# Supplementary material for: Potential Associations between Severity of Infection and the Presence of Virulence-Associated Genes in Clinical Strains of Staphylococcus aureus
Source: PLoS One. 2011 Apr 26;6(4):e18673. doi: 10.1371/journal.pone.0018673 (PMC3082525; doi:10.1371/journal.pone.0018673)
Supplement: Table S1 — Ubiquitous genes described in Figure 1 (1930 core family genes and 600 not variable in our cohort). (XLS) [file pone.0018673.s002.xls]

## Sheet: 2530_ubiquitous_sequences
Table S1. Ubiquitous genes described in Figure 1 (1930 core family genes, and 600 not variable in our cohort).
sequence	common_name	locus	strain	core	always_present
AAAAAAATTTAAGATAATAATGACAGAAGCATTGTCTTTATATATTTGGGGGTGCAACATTTTGAATACT	hypothetical protein	SA0623	N315	1
AAAAAACATTTCAAAGAAGTTGAACTCGTAACGTTTAATTATGGCCAAAGACATGATACTGAAATTGAAG	exsB protein	SA0772	COL	1
AAAAAAGTCTAAATCATATCTTAGCAGAAGATATTGTAGCTACTTATGATATACCAAGGTTTGATAAATC	molybdopterin biosynthesis MoeA protein, putative	SA2266	COL	1
AAAAAAGTTTAGGACAGAACTTTTTGATAGATGTGAATATCATTAATAATATCATTGATGCAAGTGATAT	dimethyladenosine transferase	SA0536	COL	1
AAAAAATAAATAGAGATGTTAAGTTAACATCAATTCAAACTTTAGAAGATGTGAAAGGATGGAATGAAAA	malonyl CoA-acyl carrier protein transacylase	SA1244	COL	1
AAAAAATAGATTGTAGTGTTATTGGTATTTGTGGATATGAATATCGACAATTAAAGCAAGAAACAGTACT	conserved hypothetical protein	SA2474	N315	1
AAAAAATGATGATATTTATTTTAGAATTGAAGATGGTAAAGTTTCAAAATATCATTCGGTTATCATAAAA	conserved hypothetical protein	SA2255	COL	1
AAAAAATGTTAATCCAATTGTCAATATTCCATAGTTATCATGATTTAGAGTTTCTATTTGTGACACGTGA	conserved hypothetical protein, similar to diarrheal toxin	MW0263	MW2	1
AAAAAATTGACTGGCCTGGCGAAGATATTGATAACATTTTCCATAGATTAATCAATATTAAGATTAAATA	ORFID:SA2340~hypothetical protein, similar to transcriptional regulator tet	SA2340	N315	0	1
AAAAACGGCGGTAATATGGGTGTATCTGGATCAGTTGCTTATATGTTTGATCATGTGGCAACATTTGGTA	conserved hypothetical protein TIGR01033	SA0727	COL	1
AAAAAGCAATAGGATTAAAAACATTTTTAGAGGAAAGAGGACATGAGTTCATTATATTAGCAGATAATGG	NAD-dependent formate dehydrogenase	SA0171	N315	0	1
AAAAAGCGTTAGTTGAACGTTTCAACGGTATCTTAGCTACTGAAGGTGCAGAAGTTTTAGAAGCAAAAGA	ribosomal protein S6	SA0437	COL	1
AAAAAGGATTCGGCTTTATCGAAGTTGAAGGAGAAAATGACGTATTCGTACATTTTTCAGCAATTAACCA	cold shock protein, CSD family	SA1437	COL	1
AAAAAGGTGGCGTATTTGGTACTACTCAAGGACTACAACAACAATATGGTGAAGACAGAGTTATCGATAC	branched-chain alpha-keto acid dehydrogenase E1	SA1347	N315	1
AAAAAGTATAAATTGGATAAAGACTCAGTTATATTATTAGAACAAATTCGTACACTTGATAAAAAACGAT	conserved hypothetical protein	SA1873	N315	1
AAAAAGTATGCAAGGTGCTAATATTATTATACTTGCGATGATTATAGGTGCGATGATCGCCTTCGATATG	ORFID:SA2434~fructose phosphotransferase system enzyme fruA homolog	SA2434	N315	1
AAAAATATCCATTAACTAATGCAGATAAGCAAATATTAGAAAGATATAAAATAGGATTGAAAAAAGGTTA	tRNA (guanine-N1)-methyltransferase	SA1256	COL	1
AAAAATCGTAAATATGAAGAATTAGATGTTCCATATTTTACAGATAGAACACGTGCGTCATTAAAAATTC	conserved hypothetical protein	SA1405	N315	1
AAAAATGGAAAAATAGTTATTGATTTATTATTGAAGCTACTTGATGAAAATAAAACTATGATTGTCGTAA	ORFID:SAP022.~hypothetical protein, similar to ABC transporter, ATP-binding	SAP022	N315	0	0
AAAAATGTTTATTTAAAGGGCCATGTATTATTGAAGTAAACGGACAACAGTTAAGTATTAGGCATTGCGA	hypothetical protein	MW2472	MW2	1
AAAAATTATCTTTATAAAAACTCTGATTTACAGATTTCATATAATTTCAACATGGTCGCTATTAGTGATG	DNA topoisomerase IV, A subunit	SA1390	COL	1
AAAACAGTTAGTATATACAGCTTTAATGACAGCGATTATCGCTATTTTAGGAATGGTACCGGTAATTCCA	ORFID:SA2077~hypothetical protein, similar to biotin biosynthesis protein	SA2077	N315	1
AAAACTGGAAAATTATTAACAATAATCAATAAAATATCAAGCATAATAATTATTATTGTTGCTCTAATGA	conserved hypothetical protein	SA0753	N315	1
AAAACTTCATGATTTTATTAGCAAGTCGTTTAGACGCTGTTGTTTATTCATTAGGTTTAGCTCGTACTCG	30S ribosomal protein S4	SAS052	N315	1
AAAACTTGCTGAACTACTTATTTAGTATGGGCGATCCAGTTGGGCCGTTTGCTAACTTTTTAGCAGGCGC	conserved hypothetical protein	SA1316	N315	1
AAAAGAAAATACCCAAATATATCATTTAAATATACGTATATAGATATTACAAAAGATAATGACAACTTAA	conserved hypothetical protein	SA0940	COL	1
AAAAGAAAGTTGACAATTTTTACGGATTGAGTTCTAAAAATGACAAATACGTTTCATATAAAGAAACCCA	conserved hypothetical protein	SA1649	N315	1
AAAAGATAATATTACGTATCAATCATTAATGAAATCGAATATTGAAAATATCGGTAAAGCTTTAGACAGT	ORFID:SA2194~hypothetical protein, similar to Zn-binding lipoprotein adcA	SA2194	N315	1
AAAAGATCAATTAAAGAAGTTAAGCAAAGCTATTAAATCATACGAGAGCGATATTTTAGAAGCACTATAT	aldehyde dehydrogenase	SA1736	N315	1
AAAAGCAACAAGATAAAATTAAAGATTTCTTAAAATCTAAAGGTATCAAGAGTGATGTTATCGATAAATA	conserved hypothetical protein	SA0449	COL	1
AAAAGCACGTCGCATTGAAAGTAAACAAACAATTGAATATTTAGCTCAAGCGCAACATATTAGAGACTAA	conserved hypothetical protein	SAV1878	Mu50	1
AAAAGTAAATCAATTTTTAGATTTATTTGATGAATCATTATTCGTAAAAGTAGGTATGGAACTTTTTTAT	orotidine 5-phosphate decarboxylase	SA1216	COL	1
AAAAGTATATTTAAATGGTAATTTTGAAGGCATCACATACCCAGAAAGTTTTAAAGTATTTGGTTCAGAA	tetrahydrodipicolinate acetyltransferase	SA1229	N315	1
AAAAGTATTAAAAATTTTAAAACAACAATGTCTATCGTATTTGAATGTCATATTTACACTTTACGTCAAC	ywpF protein	SA2090	COL	1
AAAAGTGGACAAATGCGAAGCTTGATTTCCATAAGTTAAAGAAAATTCTGATGCAATGGCAACGAGGTAT	alpha-glucosidase	MW0429	MW2	1
AAAAGTTAATGATTATTAATAGAGGACCAATTGTAGAAATTGAAAATCAAAAGTATATGTTTGACTATTC	conserved hypothetical protein	SA2601	COL	1
AAAAGTTAGTTATGAGCAACGTATTAATGAAATTATTGAAGCAAGTAAATTAGCAGATGAAACAGGTATT	conserved hypothetical protein	SA0327	N315	0	1
AAAATAAACTTGATATCGAAGTATCTATTATGGACTTTGATAGAGATGAGTGGGCAACACCAAATAAAAT	D-alanyl carrier protein	SA0937	COL	1
AAAATAATTTTAAAAAACAATAGTGATTTTCCGATTTATGAACAGATTAAGCAACAAGTAAAACAAAATA	transcriptional regulator, GntR family	SA1997	COL	1
AAAATACGAACGAATGAGCGATATGATAATATAGATAAGAATGATTTTAATTTAGGAGGCCTTTATGGTG	hypothetical protein	SA1890	COL	0	1
AAAATACTTAATGGACTTGTGCGTTCTTGTGAGAAACGACCAGTTAGATATCAACAACTTGAAGACATAA	conserved hypothetical protein	SA1509	N315	1
AAAATATACAATTCACACCAGTAATTAAGTGTATAGCTGGTGACCGTACAATTGTAGAAAGCTTAAAAGC	conserved hypothetical protein	SA1980	N315	1
AAAATATATTAAAAGTTTATACACTGAACTAGGTAAAATAACAGATATTGTCAATAGAATGGCTATGAGC	DNA mismatch repair protein	SA1138	N315	1
AAAATATTTTTTAGCAGTTGGTGCTGTTGCCTCTGTATTAACTTTAGGCGCTTGTGGTAATTCTAATTCA	hypothetical protein	SA0663	N315	0	1
AAAATGACTTTAAGGCAGAATTTACCGACCAAGATACGGGAGAAAAAATAATATATGATACGAATGAGGT	putative exported protein	SAR2788	MRSA252	0	0
AAAATGGTGCGCCAACACTAATATTATTGCATGGTACAGGTGGTGATGAGTTCGATTTATTACCGTTAGG	phospholipase/carboxylesterase family protein	SA2529	COL	0	1
AAAATTAATTATTAAACGACAAGATACAAGTGATTCTAAGCCTTATGAAGAAACATTTGAAATTCCATAT	succinate dehydrogenase, iron-sulfur protein	SA1160	COL	1
AAAATTATTGATTATTTTAAGCAGGTTAATGACATAACTAGCAATATTGATTTTGATAATTTAAATCAAT	hypothetical protein	SA1284	N315	1
AAAATTGAAGCTATTGTTGGTACATTAATTTTCACAGTGTTATTCATCTTTATATTTGAAGTCTATATTT	Mn21/Fe21 transporter, NRAMP family	SA1114	COL	1
AAAATTTTTCAAGCGTTCGAAACAAGGAAAATGTGGTACATGTGACATTAATCGTGATTGTTGTGGAATA	hypothetical protein	SAS088	N315	0	1
AAACAAATACATTTTTCGGTTTATTATATGCATTAGGTATTTATATTAGTGCATTATTTGCAGGCATTTA	1,4-dihydroxy-2-naphthoate octaprenyltransferase	SA1049	COL	1
AAACAATGCTTGTGTCTTTACAAACTATTGAAGAAGAATATAATGAGAATATTAGATTAAATTATAAGTG	conserved hypothetical protein	SA1701	COL	1
AAACAATTTGAAATCGTGATAGAACCGATACAAACAGAACAATATCGTGAATTCACTATAAATGAATATC	molybdopterin converting factor moa	SA2066	N315	1
AAACACATATTTTTGCAACATTATTAGCAACTCACAATTCGAACGACAGTGTTATTCTTATTACTAACAA	hypothetical protein, similar to transcription regulator, RpiR family	MW2236	MW2	1
AAACACATCAAAAAGAATTCGTTATGGTTGGACGTTTATCTGTATTAGCAGTAGCAATTGTTGCCATCGC	high affinity proline permease	SAR1994	MRSA252	0	1
AAACAGGACTACATGTTGAGCATAAAGACAAAGATCATGAAGATTATTATGAAATAAAAATTCGAATATA	ORFID:SA2498~hypothetical protein, similar to DNA-binding protein Spo0J-lik	SA2498	N315	1
AAACAGGCGAAATCTTCAATAAGTGAAGATGTCCAAATTATAAAAAATACATTCCAAAAAGAAAAGTTAG	ORFID:SA0454~pur operon repressor homologue	SA0454	N315	1
AAACAGTCCAGCAACTATTAACTGCAAAAAACGCACAAGACATTAAAAACATTTTAAAGGAGCATGATTA	ORFID:SA0320~hypothetical protein, similar to PTS fructose-specific enzyme	SA0320	N315	1
AAACATATTGTTACAATACACTTTTATTTTATCTTCATTTTTAAAATCCATTAATACAATAGAAGAAAGA	hypothetical protein	SA2586	COL	0	1
AAACATGAGTGCACAAGCACCTGCAACTAATAATGTTGAACCATCAGCTGTTCAAGCTAATCAAGTACAA	ORFID:SA1898~hypothetical protein, similar to SceD precursor	SA1898	N315	1
AAACGTAACATTAGCATGCACAGAATGTGGCGATCGTAACTATATCACTACTAAAAATAAACGTAATAAT	ribosomal protein L33	SA1369	COL	1
AAACGTACATGCCTCTAGCAATTTATTTATCACATCAATTGGCAAAACGTTTATCTGATGTGCGTAAAGA	S-adenosylmethionine synthetase	SA1608	N315	1
AAACGTTAAAATGAGTGATTTGAAAGGCACTTTAGAATTGTTAGCTAAGAAATTATTTGGTGCTGATCGT	Phe-tRNA synthetase alpha chain	SA0985	N315	1
AAACTCGTCCTTTATCAGCAACAAAACGTTTTCGTATAGTAGAGATTGTTGAAGAGTCAGTAATTATTTA	30S ribosomal protein S17	SA2038	N315	1
AAACTGGCGTCAAACACTCAAACATTTTTTATACAATTTGCATGTTTTTTTAAATACTTTTAAACATTGA	hypothetical protein	SA0965	COL	0	1
AAAGAAAATGATTTAATAAAGAATGTACCATTAAGCCAAATTAAAAATGTATTTAAAATGATAGATAAAC	hypothetical protein	SA1705	COL	1
AAAGAAAGGTTATACATCATATGCACCGCAATATGAAGGCCACGCGGCACCACCAGATGAAATACTGAAA	carboxylesterase	SA0845	COL	0	1
AAAGAAGTAAGTGATCAAGGTAGAATTACAATAAATGGTAATGTTGCTAAAGCTGGATCGGATGTTAAAG	S4 domain protein	SA0550	COL	1
AAAGACAGAAATATTCATGATATTAAAGTACATTCAAGAGGTACTGGTAGCTGGAATTTAGGAGAGCCGC	ORFID:SA1697~hypothetical protein, similar to protein-tyrosine phosphatase	SA1697	N315	1
AAAGATAGCTTGTATAAATCTTAATGAATATCAAGATAAATTAAAAATACAATTATTGAAAATCGAAAAT	endopeptidase resistance gene	SA1265	COL	1
AAAGATATAAGGATATGAACACTTGGCTTAAATTCCTAAATCAAGTTATGAATAGTAACATGTTTATTTA	conserved hypothetical protein	MW1692	MW2	1
AAAGCAAAAGAATTAAATTCTGATGTATATGTTGTAAAAGCACAAATTCATGCTGGAGGTAGAGGTAAAG	succinyl-CoA synthetase	SA1088	N315	1
AAAGCGATTCAGATTCAGACAGCGACTCAGACTCAGATAGTGATTCAGATTCAGATAGCGACTCAGACTC	Ser-Asp rich fibrinogen-binding bone sialoprotein-binding protein	MW0518	MW2	0	1
AAAGTAGTCAATCTTATTATGACAAAAGAAAGAAGAACATTTAGTTCAGAGTTTAAGTTACAAATGGTTA	probable transposase	SA0379	N315	0	1
AAAGTATACGCTTTTACTTGACACTCAACTTGATAAAAAATTAGTTATTGCCATATGTTGCACCACATTT	conserved hypothetical protein	SA0555	N315	0	1
AAAGTCATTAAGTGATGAACCTGTCTATATATTAGGTTCAATCGTTGCGATGCATGTGTTAAAAGATTAC	putative hydrolase	SAS2467	MSSA476	0	1
AAAGTGAAAATTGGAGGTGTAATTTTGACTAGAACTTATAATATTATTGGTATCCTTTCTTGTCTTATAT	hypothetical protein	SA1041	COL	0	1
AAATAAAGAACCTATTCATGATGAGCCAATTTATATTCATCAATCTAAAGATGATATTGAAGTAGAAATT	DNA gyrase, B subunit	SA0005	COL	1
AAATAAATCTAAATTTACATCAAGAAGACGATGGCAGTAATATTTTAACAGAATATGAAAAGAAATTTTC	tRNA (guanine-N(7)-)-methyltransferase	SA1798	COL	1
AAATAAATGAAGAGCATGTTATTATATTACCTATTTGGCATAAAGTGAGTGTTGAAGATGTACGTGCATA	hypothetical protein	SAS0038	MSSA476	0	0
AAATAAATTTTGCGAAAATATCATTTCTGTCCCACTCCCTAGATTGATCTATAGATACTACACTTATTAA	hypothetical protein	SAS0775	MSSA476	0	1
AAATAACGATGTAACTACAAAACCATCTACAAGTGAACCATCTACAAGTGAAATTCAAACAAAACCAACT	sdrE protein	SA0610	COL	0	1
AAATAACTTATCCGAAGAGTTGTCAGTAATAAATACGATTAAACTAGAAAGTATAACACACTATCACTTT	ORFID:SA2433~hypothetical protein, similar to transcription antiterminator	SA2433	N315	1
AAATAGAGATCGTAAATTTGTAATTATGTATGTGAATGAGCAGGATGTTGATCAAATTGTACATAAACTA	conserved hypothetical protein	SA0970	N315	1
AAATATAAAATTGATTTTAGCAAAGGTTTAGTGCCAGCAATTTTACAAGATAATCAAACAAAACAAGTAT	histidine biosynthesis bifunctional protein HisIE	SA2464	N315	1
AAATATATTAATATGACGATTCCTAAAGGTGCCGGTGCTAAAGTCGATGTAATTGCCGCAAAAATTATAA	ORFID:SA0987~hypothetical protein, similar to ribonuclease HIII	SA0987	N315	0	1
AAATATTAAACTGACAAAGGATATCTACGGTACAAGTGTTAAATCAAATTATATTTTGAAGTATGTATTT	conserved hypothetical protein	SA0456	COL	1
AAATATTCAGTACTAAGAGCTTTAAAAGCGATTGAACGTTCAAATGTTGTTTTAGTGGTCATTGATGCAG	ORFID:SA1307~hypothetical protein, similar to GTP binding protein	SA1307	N315	1
AAATATTTTAGTGTTAACAATTATGTTAGTCATTACTTTGTATTTCAGTTATATTATTAAAACACTCGCA	hypothetical protein	SA2141	N315	1
AAATCAAATGACTTATTTGAATCAATTTAGTCAACGGTTTTTAAATATTGCTAAAGGTTTAGTGACGTTA	ORFID:SA0639~hypothetical protein, similar to ABC transporter required	SA0639	N315	1
AAATCACCGATTAAGAAAACTTAATGATTTAGCCGATAAGATTAGAAATGGTGAACAAATAGAATTATAA	conserved hypothetical protein	SA0722	N315	1
AAATCAGATTCTCCAGCTTTAAATAAAGGTTTCAACAGTAAAAAGAAAAAATTTACTGACTTAAACTCAC	ribosomal protein S12	SA0591	COL	1
AAATCATCGATGAAGCGAAAGCATACAATTTTAAATCTGTATGTGTGAATCCAACGCATGTTAAATATGC	deoxyribose-phosphate aldolase	SA0133	N315	1
AAATCGAAATTGCTGCAAATCACATTTTAAAAACACGTGAAAAATTAAACCGCATTTTATCAGAGCGTAC	ATP-dependent Clp protease, proteolytic subunit ClpP	SA0833	COL	0	1
AAATCTAGAAATTATGCTTTTCGGTGACGAAAAAAAGTATAATCTGAACCATGAACGAATCGAATTTAGA	fatty acid/phospholipid synthesis protein	SA1072	N315	1
AAATCTGAATTATGACGAAGATCAATCAAGAAAAACAGCACCAAGATCATTTCAATTTGAAAGTACCTTA	hypothetical protein	SA2447	COL	0	1
AAATGAACTATGCTGGATTTAATGTTAAATCTTCAAGAACAATTTTAAATCCAGGAAAATATAATTACAT	LysM domain protein	SA0820	COL	1
AAATGATAACACACCATTTGGTATATTGGCCGAACACGTTAGTGAAGATAAAGCATTCCCTCGATTAGAA	hypothetical protein	SA0751	N315	0	1
AAATGATGCTATTAAAATTTTAAAAGAGAACGGTTTAAAATATACAGATAAACGTAAAGATATGTTAGAT	transcriptional regulator, Fur family	SA1611	COL	1
AAATGATGGTGTCGTACCAGTGATTTCGTCGTTACATCCATCCAATCAACCATTTATTAATGTTACGAAT	glycerol ester hydrolase	SA0309	N315	0	1
AAATGCTGCAATGATGGCACAAGGTATTGGAAGATTAACAGGTAAACCGGGTGTAGTACTTGTTACAAGT	alpha-acetolactate synthase	SA2008	N315	1
AAATGCTGTTTTGATTACCTTAATAATATTATTATGATGAATCAAAATAAATCGAACTATTCAATTGATG	ica operon transcriptional regulator IcaR	SA2458	N315	1
AAATGGTTATCCTATAACAAACTATGAACAAATTGATAATGCTTCATGGACAATTACAATTCAAAAAGTT	conserved hypothetical protein	SA1849	N315	1
AAATGTAACAAGCCATCAACTTGAAGAGTTAGAACTAAATCAAAAATTATCGGATTTTCGATCAATATAA	acylphosphatase	SA1439	COL	1
AAATGTATTAGTACTAGGAACTGAAGGCACAATTAAATCTGAAGCATATCGTACGCATATTAAACGTATC	glutamate racemase	SA0997	N315	1
AAATGTTATATCTCAAGAAGAAGCTGAAAAATATTTACAAATGGCTCATGAATTTTGTCCATATTCAAAA	OsmC/Ohr family protein	SA0872	COL	1
AAATTAAAGTATTAATGTTAACTAGTTTTATTGAAGATAAAGAGGTATATCGTGCATTAGATGCAGGTGT	DNA-binding response regulator VraR	SA1942	COL	1
AAATTAAGTCATTACTTGGAAACTTCAAATCTGACATTAATCCTAATATTGAACGTTTACAGTCACACAT	conserved hypothetical protein	SA1895	COL	1
AAATTAAGTGATGATATTCAAATGAACTTCGATAAAGTGAATCAATTATTGGATAAATATAAAGATAACA	conserved hypothetical protein	SA0331	N315	1
AAATTAGCGTTGTTAAAAGGTCAAGAATATGAAATTGCAACAATTAATGATCTTACAGAAGCTTTTGAAG	ORFID:SA0246~hypotheticl protein, similar to D-xylulose reductase	SA0246	N315	1
AAATTAGGATTTGTCAAAACAACAATAGAATATGCGTTGAAAGATGACAGTATGCGAGAAGAATTAACAC	UTP-glucose-1-phosphate uridyltransferase	SA2288	N315	0	1
AAATTATATCTTAGCAGATATGATATTTACGTATCCTCTTCAATTAACTTTCTTTATCCTTTTACTAATG	conserved hypothetical protein	SA0767	COL	1
AAATTCTCTCAGATAGTATTTTAGATATTGACTCTCAAAATATAGATAATCATGACTTATTAGAAATTTA	single-stranded DNA-binding protein family	SA2089	COL	1
AAATTGTCGTTTTATGGCGGGCTGAAAATGCTGTTTTATGACGGTTTGAAAATGCTGTTTTTGGCGATTT	hypothetical protein	SAR2297a	MRSA252	0	1
AAATTTAAGAGAAATTTTACTTAAAGCAAATACTTACAACAATATGCATATAAATATTGATACTGAAAAA	ORFID:SA1585~proline dehydrohenase homolog	SA1585	N315	1
AAATTTAATAGCTTTAGTATTGGATAGTTTGGACATTTCAATATTTGATGTCAATACACAAATTAAAGTG	conserved hypothetical protein	SA0274	N315	1
AAATTTCGATAAAGTAAAAGATATCATCGTTGACCGTTTAGGTGTAGACGCTGATAAAGTAACTGAAGAT	acyl carrier protein	SA1247	COL	1
AAATTTGCAGAATTAGTGGTTATGTCTAACCCATCAAAATTCGAAGATGCAGAGGATATAGCTAAAGAAA	conserved hypothetical protein	SA1306	COL	0	1
AAATTTTACCTGTCATTTTAACAGTGAGTGGTACATATACTGGATTACAATTATTATTAACAATATTCCA	L-lactate permease	SA0093	COL	1
AAATTTTGGACGATAACATTTACAATATTTCTATTTTAAACAAGACATTTATTGAATTTGAACAAAATTT	hypothetical protein	SA0749	N315	1
AAATTTTTGAGTAAGAGAAGTATGTACTTAACTATTCCTGTAACAATTCTTATTTCAATATTTTTGAGTT	conserved hypothetical protein	MW0608	MW2	0	1
AAATTTTTGATGGTAAAGATCATAAATTTGATTATAGTCTATATGAACTTGCTAACAAGTTATCTATATA	6-phosphofructokinase	SA1746	COL	1
AACAAAAATTATAATGATTTAAGAGAAGCATTAGAAAAATTACAATTGAATGATGCATCATTAGAATTTG	GTP-binding protein LepA	SA1641	COL	1
AACAAATGAAAGCTAAGGAAATTAGAGACTTAACCACTTCAGAAATCGAAGAACAAATCAAATCTTCAAA	50S ribosomal protein L29	MW2161	MW2	1
AACAACTTTTAAATATTAATATCGGTAATCAATCATCGATAGCTTATAAAGTAATGTTAGATATTTTTTA	ORFID:SA0717~hypothetical protein, similar to O-acetyltransferase	SA0717	N315	1
AACAAGCGCCGAAACTATTATTGAAAGGTGATGGTGATTTAAAAGGATCATCAGTAGGATCAAAAAATAT	putative exported protein	SAR2570	MRSA252	0	1
AACAAGTTGTTCCAGACATTTATATTTTAGGTAAGGCATTGGGTGGCGGCTTATACCCTGTATCTGCTGT	ornithine aminotransferase	SA0179	N315	1
AACAATGATTCAATTATGAGATTCAAAAACGTGAATATTAGTTTCTTTAATACGACACACAGTATTCCTG	conserved hypotehtical protein	SA1118	N315	1
AACAATTTGAATTATTTAGTATTGATAAATTCAAATGTAATTCAGAGGCTAAGTATTATCTTAATATTAT	hypothetical protein	MW1851	MW2	1
AACAGCATCGCAGTTAAAGCAATTAGAAGAAATTGTTAAAGAATGGAGCGCAAAATATGATTTATCAAAA	ORFID:SA2469~hypothetical protein, similar to histidinol-phosphate transami	SA2469	N315	1
AACAGGAAAACCTAAGAAAGTTGCCTTCTTCCAAATGATAGGTGATAGTGCGATGGATGGATTTAAAATC	probable pyrimidine nucleoside transport protein	SA0302	N315	1
AACAGTTCAAAATGATTTTGTTTCAACGATTATTAATAAACATAAAGGCAAGAAAGTTATTTTACTAACA	capsular polysaccharide synthesis enzyme Cap5P	SA0159	N315	0	1
AACATAAATCGTAAAGAATATGCTATTGTTAACTTAGACCAACTTAATAAATTTGAAGATGGTACTGAAG	ribosomal protein L15	SA2220	COL	1
AACATAGAGAAATTGGATTCCCAATTTCTACAGACAATGCAAGTTGGCGGGGCCCCAACATAGAGAAATT	hypothetical protein	SA0786	COL	0	1
AACATATCAACAACCAGTAACAATTGCAGAAATTCAAACACTCGAATCACTAATTGAAAAGATTTTAGAA	uroporphyrinogen III synthase	SA1493	N315	1
AACATATCGAATTTAACGATGGCCATCGCTCAAATGATTCACCATTTTGAACAAATCACTTTTATTAACA	ORFID:SA0235~hypothetical protein, similar to BglG antiterminator family	SA0235	N315	1
AACATATGTACATTATGTGATTCCAGTTAAACAAGTAACAACTGAAATTCAACATTTGGTTGAAGCATTT	ORFID:SA2258~hypothetical protein, similar to diaminopimelate epimerase	SA2258	N315	1
AACATCCGTTGTTATTTTCCAAGCGATTACAAATAATCGTTTATTGACACCATCAATAATGGGATTAGAT	FecCD transport family protein	SAR0788	MRSA252	0	1
AACATCTATATCAAGGTCAATTCTATAATTATTCTTATGCGATCCCTCTATTGCATGAACAACAACAAAT	putative type I restriction enzyme specificity protein	SAS0026	MSSA476	0	0
AACATGCATTAGATTTATTAGGTCTTGCTACTTTAAGTTTACTAGATACATTTTCTTGTAATAAAAAATA	hypothetical protein	SA2451	N315	1
AACATTAATATTATCTATTTTATTTCCTGTGATATTCTATATATTATTTACTTCGATATTGGAATTGCCG	ORFID:SA1157~hypothetical protein, similar to ABC transporter integral	SA1157	N315	1
AACATTTACTAATGGTAAAGTTGGGAAAAGCGACAATGTTTTAGAATTTTATACGATTGATGGTAATATC	conserved hypothetical protein	SA1989	COL	1
AACATTTCAAACCAATTCAGTCATGCAATCATGATTTTCTTATTTTAAATATGAAGGGTGAAGCAATCAC	ORFID:SA1095~site-specific recombinase XerC homolog	SA1095	N315	1
AACCTATTTTGTATTCATTAAATTATATGAAAAATAGCTTAGTTCAATTTAAAATCACTAGAAAAATATA	transcriptional regulator, GntR family, putative	SA1296	COL	1
AACGAAAAAAATCTATAGTCATAGAAAAATTTATGTAGAGCCTGTTTTTGGATTTATGAAGGTTATTTTG	truncated transposase	SA1222	N315	0	1
AACGAAATTGCTTCAACCCGCTTCAACTTCAACTGGCTTCAACTTCAGCCTACTTCATTCAATAACAAAA	hypothetical protein	SA0210	COL	0	1
AACGATATAGTACAGGTAGTAAACTTATTAAAATAGATCATCATCCTGCAGTTGATCAGTATGGTGATAT	conserved hypothetical protein	SA1526	N315	1
AACGGTTGCTAAAGTAAAAGAGGATGCAGACGAAGAAAATGAAGATGAACAATCTACTGTATCTGAAGAT	DNA gyrase subunit A	SAR0006	MRSA252	0	1
AACGGTTGGCAAACAATATGATGTTATCAACGAAACTGAAGAATATTATCAAATAATAGATAATTCTGGA	conserved hypothetical protein	SA1446	COL	1
AACGTAATTTAAAATTGATTAAGTATGCTTATCAGCAAACAAATGGTGAATTTTTAATTATAGGTACAGG	dihydroorotate dehydrogenase	SA2606	COL	1
AACGTGACGCAATTAAAAGAACGTTATCAAGTAAGTAAGAGTACTATCATTAAAGCATTAGGCTTATTGG	ORFID:SA0254~hypothetical protein, similar to transcription regulator GntR	SA0254	N315	1
AACGTTATGTTTATGAACTTTATGACAAGCATACTAAGCATATTGCAGTTGTAACAAGTGATATGAGTGA	conserved hypothetical protein	SA0491	N315	1
AACTATAAATTATTAATTGGTTCAATTATTCCACGACCTATAGCATTTGTTACAACATTAAATCAAGATG	conserved hypothetical protein	SA2452	N315	1
AACTATAGATCATAATGATGATTTATTTAAACATGTAAAGGATATATTACGTAAACAAGGACAAATTTAA	hypothetical protein	SA1049	N315	1
AACTATCATACTAAAGTTGGTTTAGATCAGATTAAAACAGCAAGAGCTCGTGTAAAGGATTTGGAATATA	conserved hypothetical protein	SA1331	N315	1
AACTATGGTATTATGTGGATTTTTATTCCCGTTAGCTATCACGTTAATTGGTCAAATATTTTTTTATCAA	K1-transporting ATPase, C subunit	SA2066	COL	1
AACTGAAAAAATAAATATCATATTTTATGGGGTTTGTGTATTGTGTATCTTATTGTTACCAATTATTTTC	ORFID:SA1687~hypothetical protein, similar to teichoic acid transport	SA1687	N315	1
AACTGAAATTAAAAATAAAGGCGTTAATATCGCATTTGTTACATTACATGTTGGGTTAGGTACGTTTAGA	S-adenosylmethionine tRNA ribosyltransferase	SA1466	N315	1
AACTGGGCATTATACGCCCATACCTCATGAACCTCATTATTTGGTTATTAGCCATGCGGATAAACTTACC	ORFID:SA2369~hypothetical protein, similar to ferrous iron transporter	SA2369	N315	1
AACTGTAATTAATAAAGTTTACCATAGATTAGTAAAAGATTATGATGTCATTATGACAAGAGAACCGGGC	thymidylate kinase homologue	MW0437	MW2	1
AACTTAGATTTTATCGATTATTTATCACGTAAAAATGTTCCTTATCAATTTGAAGATGGACCAGGAGATC	ORFID:SA2422~hypothetical protein, similar to tributyrin esterase	SA2422	N315	1
AACTTTAAAGAAATCAAAGAATTAATTGAAATTCTGGATAAATCAACTTTAACGGAAATCAATATTGAAG	acetyl-CoA carboxylase, biotin carboxyl carrier protein	SA1572	COL	1
AACTTTAACAAAAGGTATTGATGTCGTCTTTGACATTACAGATTTTCATCAAAGAATTAAAGATGCAGAC	glycerate kinase	SA2435	COL	1
AAGAAAACGGGAAAGCTAGAACTGGTTGGCTGATTGTTGACTATGCAGGATATCCGTGGCCTGGATATGA	1-phosphatidylinositol phosphodiesterase precurosr	SA0091	N315	1
AAGAAACAATTAAGTCTGGTACTATCAGTATCATTATGATGGGGATTATTTATACCCTACTAGCAATCAT	ORFID:SA0180~hypothetical protein, similar to branched-chain amino acid	SA0180	N315	1
AAGAAATTATTATAATATTGAAAAGTTATATCAAGATGCACCATTAGAATCATATGGTCAGGTTGCGTAT	conserved hypothetical protein	SA1420	N315	1
AAGAAATTGAAGAAACAGCATATATTAATCAAGAAAAAGTATTAAATGCATTTCATCATGTCAAAGCAAC	conserved hypothetical protein	SA1327	COL	1
AAGAAGAATATACAATTGACATTGGTAAGGCTAATGTGAAAAAAGAAGGTAATGACATTTCAATCATCAC	pyruvate dehydrogenase complex E1 component, beta subunit	SA1103	COL	1
AAGAAGATTTAATATATCCAATTTTTGTAGTTGAAAAAGACGATGTGAAAAAAGAAATTAAGTCATTGCC	delta-aminolevulinic acid dehydratase	SA1715	COL	1
AAGAATGGCTTACAGAACATGTCCCAGGAAATAATGAACTAAAAGATACAAATGTCGAGTTTTATTTTAA	hypothetical protein	SA2443	N315	1
AAGAATTAACATCATTAGCAGTTATTTTAAATGGTGTCATTATTTATGCCCTAGGTAATAAATTCTTGAA	holin-like protein LrgB	SA0253	N315	1
AAGAATTATGACCAAATAAGTTCTATTGAAGAACAAGAATTTATTGGTGATTTGATTCAAGTCAATCCAA	conserved hypothetical protein	SA1242	COL	1
AAGACAATGACAAGAAAAATGGATTAAATTTATTAAAAAGTAGTGCAGTAGCCACGTTACCGAATAAGGG	triacylglycerol lipase precursor	SA2463	N315	0	1
AAGACATTCGTAAATTTGCAGAAGAGGAAAATGTAAGATATTTAAGATTACAATTCACTGATATTTTAGG	glutamine-ammonia ligase	SA1150	N315	1
AAGACGATATTACAAAATTTGAATACTTAAAAAAATCTTCTCAAAATACAGGTACTGTCATTATTGGTAT	thereonine dehydratase	SA1866	N315	1
AAGACTATATTTTATTAGTCGTTAGTTTCTTAGTTTCAATCATATTGATAATTAGACATCGCTCTAATAT	conserved hypothetical protein TIGR00023	SA1388	COL	1
AAGACTTAGACCATTTGAGTCAGCAAATACACAAATCGGAAGATTCAGCAGTGTCTACAACAGATAATAA	putative surface anchored protein	SAR2725	MRSA252	0	1
AAGATAACAAATATATTAGAAATGATATTCGTAATAGAATTATTCCAGCTATTGATGAAAATAATCAACT	conserved hypothetical protein	SA0467	N315	1
AAGATAATGCATATGTAAATGATTCAAAACAAAATGCTGAAGTAAATAATAGTGCTGAATCTCAATCAAC	truncated FmtB protein	MW2086	MW2	1
AAGATAGTTGCAGGTTTGACTGCAGCCATTGAAGCTATTTCTAATGATGAGGATTTACGTATAGCTCTAG	pyrrolidone-carboxylate peptidase	SA2482	N315	1
AAGATGAAACAGAAACATACTTAAATTTAAAAATAGAATCTACTGATGATTTAAAAATAGCTGCTAAACG	carbohydrate kinase, PfkB family	SA0308	COL	0	1
AAGATGTTATTGGTGCTTTGAGAAATTTAGATTATGTATCAAAAGTAGAATTAATTAGTATGAGTATGTA	ORFID:SA1469~hypothetical protein, similar to chorismate mutase	SA1469	N315	1
AAGATTAATTTGCAATTGAATACTAAGGAACTACTAGGGGAGCCTAATGATATGGCTGAGATGAATTGTT	hypothetical protein	SA2087	COL	0	1
AAGATTACAGAAATGATTGAAAGACATCAAATCGAAGGTCATGATGTGATGAACGTAATTAATCAATTAC	conserved hypothetical protein	SA1558	COL	1
AAGATTTTTTTATAAAAGAGAAATTGAAAATAGAAAAAAACATAAGCAGCCTTCAACATTAAATGTTAAA	esterase, putative	SA2345	COL	0	1
AAGCAATCAAACACATATTGAAATTATTTACTTGAAGTCTTGTGATTTAACAACAATTCTTCACAATTTA	riboflavin specific deaminase	SA1589	N315	1
AAGCAGTATCGGAGTATATGAACCAAGTAAATGCTGATGACACTACTTTTGTAGTTATTAACTCTACATG	conserved hypothetical protein	SA1464	COL	1
AAGCATTACTGTGAATGAAACTATTTTTAAGCAGATTTCTAATAACACCAATACCAAAGGCAATGTATTG	molybdenum cofactor biosynthesis protein C	SA2069	N315	1
AAGCTAAACGGTAAAATAGATGGGAAAATTGATGTTTATATCGATGAAAAAGTGAACGGAAAACCTTTCA	putative surface anchored protein	SAR1104	MRSA252	0	1
AAGCTAACTGATAGTAAAAAGAAACAATACGGTATGTTATTTGATGCTAAAAATTTCTATTTTAATTATC	ORFID:SA0207~hypothetical protein, similar to maltose/maltodextrin-binding	SA0207	N315	1
AAGCTTATGAATCAATTGATAAATCTGTGCTAATAGAGTTGGGGTTAATCGTTGGGAAAGATGCAAGGCG	conserved hypothetical protein	SA0450	N315	1
AAGGACCACAAAATAAGGTTAAAGAAAAAGTAATGCAATCTTTAATTCAAAAAGGGTTTGAAATGGAAAC	conserved hypothetical protein	SA1690	N315	1
AAGGCATCTAACTTTATGGAATCATTACCATTTCTAATTATTGTAGAATTTTTATTTATATACATTCCGT	succinate dehydrogenase, cytochrome b558 subunit	SA1158	COL	1
AAGGTAACGTACCTGGACCTAAAAAAGGTTTAGTAGAAATCAGAACTTCAATTAAAAAAGGTAATAAATA	ribosomal protein L3	SA2239	COL	1
AAGGTATTTTCGCTTTAGAAAATAAGGTATTACGTGATATGATGGATGTTAAAATATATGTTGATACAGA	uridine kinase	SA1439	N315	1
AAGGTCATTACTTCATTCAAATCCAGATTTTATAATCAATGATCCATCAGAAATTAATACAGTATTATAA	ORFID:SA0530~hypothetical protein, similar to indigoidine systhesis protein	SA0530	N315	1
AAGGTGAAAGTGTTGCTAAAAACATTAAACGCATCTTAAACGGTGAATCAACTGAAGAATTCGAATATGT	ORFID:SA0802~hypothetical protein, similar to NADH dehydrogenase	SA0802	N315	1
AAGGTGGGGTTCCAATATCATCATTTAGCTGATGTTGAATGGGTTATTATTTGCTACTTGCATATGAATA	hypothetical protein	SA0206	COL	0	1
AAGGTTCAGAATATCAATTAAGTGAAATTAATTCTGGTTCTGTAAAATACGAACAAACGTATGATAATTT	conserved hypothetical protein	SA0020	N315	0	1
AAGGTTGGTTTAGTACATTCTCATTCATTTGTCTGAGCATTTTTATCATCACTACGCTGATATTCATCAT	ORFID:SA0263~hypothetical protein, similar to proton antiporter efflux	SA0263	N315	1
AAGGTTTAGATGATGAAGTTCGTGTTCCACTACCTAATGGTGGCGAAATGAACGTAAAAATTGTTAATAT	transcription elongation factor GreA	SA1665	COL	1
AAGTAATTTTGACGACTGTATCTAAAATTAATATTGATGCTTCTAAAGTAATTTTGACGACTGTATCTAA	hypothetical protein	MW1492	MW2	0	1
AAGTATTAGTTATAATGAAATAGAGAAGATAGATTATGATGGTCAAACTATAATGTTCAAATTTAATATT	conserved hypothetical protein	SA2288	COL	1
AAGTATTTTGGAAGAGATATAAAGATAATATTAAAAAGTCTATAACAGTTGATGAAATACGAAAAAATGG	recombination protein U	SA1489	COL	1
AAGTATTTTTAAAATTAAACTAATGAATGGCATTTGTAGGTCTGAAAATATGAATATGAAAAAGAAAAAT	hypothetical protein	SA0393	COL	0	1
AAGTCATAATTATAGTTATGATCAATTATATGACTTAATTAATGAAAAATATTTAATAAAAATGGGTAAA	bifunctional autolysin	SA1062	COL	0	1
AAGTGAATTAATATCATTGAAGAAGGACATTGGCTATTTATTGTTAGATGTAAATCAAGCTTCTGTCGTC	ORFID:SA0169~hypothetical protein, similar to acyl-CoA dehydrogenase family	SA0169	N315	1
AAGTGATTGACTTAAATGAGTATGAAGAGGATCAAGAATTATTAGATTTAACATTCTATGATAGAAAAGC	5 nucleotidase family protein	SA1031	COL	1
AAGTGCTAAATATAAATCCGGAAAACTCATTTTAGATGAGCGAAACTTCGAATCATTAATACGCCAATTT	putative small heat shock protein	SAR2475	MRSA252	0	1
AAGTGTGTTATTAATTGCATTTTTAGCCTTTTTATATTTTTCAGTAATGAAGCATAATGAGCGCATTGAA	conserved hypothetical protein	SA0275	N315	1
AAGTTAACAATTGTGAATGTAATTGATTCAAGAACGTATTCTTCTTATGAAGTTTATGATGCTCAATTTA	universal stress protein family	SA1759	COL	1
AAGTTAATCCTAATAATATTGAATTAATCATTAGTGCAGTAAAAGAAGAACAATATCCAGAAACAGAATT	conserved hypothetical protein	SA1497	N315	1
AAGTTTATATACCTGAAAATCATACTGACTTTATCTTTTCAGTGATTGGAGAGGAACTAGGTTTTATCGG	hypothetical protein, similar to rod shape determining protein RodA	MW2007	MW2	1
AATAAAAACAATACAATTTTAAAAATGATCAAAGGTGAAGAAACATCACATACACCTGTTTGGTTTATGC	uroporphyrinogen decarboxylase	SA1889	COL	1
AATAAAATTAAAAATTTGGATACTATCAAAACATATCAACAAATTGAAGCACAGATTCATCAGAACCAAA	conserved hypothetical protein	SA1313	COL	1
AATAAAGAAGATCAGCAAGTCCCGTTAGCAGTTCGAAAGGCAATACCACAATTGACAAAAGTAATAAAAA	conserved hypothetical protein	SA0185	N315	1
AATAAAGACTTAGATTATAAGAGTAAATCAAAAGAGCCAATACAATTATTAGTAATCATGGGTATTACAG	transcriptional regulator, putative	SA1301	COL	1
AATAAAGATAGCAAGACAATTAATGTTGGTACTGAGGGGACTTATGCACCATTTAGTTTCCATGATAAAG	ORFID:SA2202~hypothetical protein, similar to ABC transporter, periplasmic	SA2202	N315	1
AATAAAGGGTATAGAGAAGCATTTAAATCAAATCAACCATTATCATTAGGTTTAAATACTTACAAAGGTC	alanine dehydrogenase	SA1758	COL	1
AATAAAGTTAAAAAGAATTTAGAAAAAAGAGTAGAATCTATGAATATGACTGAACAAATCTTTAGAGTAG	transcription antitermination protein NusG	SA0582	COL	1
AATAAATTGCAATTAAATACAAATTATGAAGAAATAGATAATTTAGCAAATACGTTTAATGAGATGATGA	sensor histidine kinase ArlS	SA1450	COL	1
AATAACTTTAGAGCAACAAAATTGGCAACAACAGGTGGGTTTTTAAGAGCAGGTAATACAACATTCTTAT	conserved hypothetical protein	MW0438	MW2	1
AATAATAAAAAGTTTCAAGTTGCTGTAAATGAGGAATTTGTACAAAAATCAGATTTCATTCAACCTAATG	probable molybdopterin synthase small subunit	SA2065	N315	1
AATAATCTAGATCAATTATATAGATCTGTCATTATGGATCATTATAAAAATCCTAGAAATAAAGGTGTAT	NifU domain protein	SA0917	COL	1
AATAATGCTGCGTTTAATCAGTCAGATTTTGATTTTGTATCGTCATATATAAAAAAAGGATCATCTTTTT	TcaA protein	SA2146	N315	1
AATACAATTAAACCAGATTTGGCGATAGCTGTCGATGTAGGTATTGCTTATGATACCCCAGGTATGTCAG	ORFID:SA2244~hypothetical protein, similar to endo-1,4-beta-glucanase	SA2244	N315	1
AATACATAAAGATGAAGCTACAACTAAAGTTGTCAGTGATAACACGGAACCGCCGATTGAATCAAAAGGC	hypothetical protein	SA0121	N315	1
AATACATTTTTAAGTGATTCGCATGGTGTTAATACCTTTTTCCATGGTCATACATACACCGGAAATCAAA	adenosylmethionine-8-amino-7-oxononanoate aminotransferase	SA2214	N315	1
AATACGCAGGGTATCAACGATGATGATGTGATTGTAACTCATGATGCCGTAAGACCATTTTTAACTCAAC	conserved hypothetical protein	SAR0246	MRSA252	1
AATACGGAAGGAAAAGTAGAAGTATTTACGACTAGACCAGACACTATCTATGGTGCATCATTCTTAGTCT	leucyl-rRNA synthetase	SA1579	N315	1
AATACTAATGTTAAACATACAACTTTAGAAGCGTTTGTCACAACCGTCAATGATTTGGGTATTGAATTAA	hypothetical protein	MW0907	MW2	1
AATACTTTGAGTCCTGTTGAATTTCAGAAATTCAGTAAAATTTATGATATTTTAACTGAAGATATGATTA	ORFID:SA0515~hypothetical protein, similar to deoxypurine kinase	SA0515	N315	1
AATAGAACTTACTGATGCAGCAGTAACTTGGTTTAAAAATGAACTTGAGTTGCCTGAAAATAATAAAGTG	conserved hypothetical protein	SA1387	COL	1
AATAGATACAGATGATTTAAAAGGTCGTACGTTAACAGCAGTATTGAACGTGCGCAAAGATTTATCAAAT	conserved hypothetical protein	SA1692	N315	1
AATAGATACTACAGTAAACGATTACCAGAAATGGTTGGTGTATTCCAAGGTTTAACATTTGTGGTTACAA	PTS system, arbutin-like IIBC component	SA2114	N315	1
AATAGATATATCATAGAAATTATGAAAATAAGACAACGAGTCATGGAAATGTTACTATTACCTGAACAAA	teichoic acid biosynthesis protein X	SA0596	N315	1
AATAGCAGCCGGTGCGAAAGTTTTAGGAAATATTAAAATAAATTCAAATGTAAATATTGGTGCAAATTCA	serine acetyltransferase	SA0575	COL	1
AATAGCGACAAATTCTCAATTTTTTTATCCTATGACCTATTTCAAACCCCAACAGATACTAGAACTTTAA	truncated transposase	SA1604	N315	0	1
AATAGGAAAAAACGGTGTTGGTAAAACAACCATTATGAAAGTAATGAATGGTAATATTATTAAATTTGAT	ORFID:SA1745~hypothetical protein, similar to ABC transporter, ATP-binding	SA1745	N315	1
AATAGTTTATCGAATTTCTTATTAAATAAAAATTTAACATTAACAACGTTTATATTCGGTATTATTGAAC	PTS system, IIABC components	SA2552	COL	1
AATATAATTTAGCTAGACAAATGCTTAATATAGGTTCTACTTTAACTATTTCAAATGAAATTGAGTCTTT	thiamine pyrophosphokinase	SA1236	COL	1
AATATACCATTGAAACACATGATCAAACTGATTTTGTAAAAGATGTATATTTTATCGAAGTTGAATCATT	MutT/nudix family protein	SA1841	COL	1
AATATATGAAACAAAAAGATACTGAAACAGTATTCCAATTAGCATTACCTCATTTAATTAAAGCAAATTT	glutamyl-tRNA synthetase	SA0574	COL	1
AATATATTATAGAAATGTTGAAAAATGTTAAGACACCAGTATTTTTAGTATTAAATAAAATAGATTTAGT	GTP-binding protein Era	SA1624	COL	1
AATATATTATGAAAGAAAGACTACATATTAGCATCAATCAATTAGAATTATCGCCATATCACGTTGATAG	oxidoreductase, aldo/keto reductase family	SA0748	COL	1
AATATATTATTTAATCGTGATGACTTAATTAAAATGAAAAAGATTGATAATATAAATGTGAAAAAGATAA	hypothetical protein	SA2254	COL	1
AATATCATTGTCGCTTTTATAAAGTTGATCAACTAAGTGTACAATATCGTACATCATTTTTAATATATAA	hypothetical protein	MW1998	MW2	1
AATATGAACAAGTGACTTACCTCATAGATGCTAATCCATCTATTTTAACACCATCTTTTTATGAGCATCT	conserved hypothetical protein	SA0184	N315	1
AATATGAGCTATCGCAATGGCAAAAACGATCATGTCACTTTATCTTTAGAAGGTCAAATTGTCAGGGATG	conserved hypothetical protein	SA1892	N315	1
AATATGATTAAAAATGATGAATGGCATACTTATAAAGTGTCTAAATATTGGCGGTCAATATTACTTACAA	hypothetical protein	SA2642	COL	0	1
AATATGATTTGACAACTCAAGACAGTACAATCAAACGTAACAATTCAATAAATGATAAAGACTTCGAAAA	hypothetical protein	SA0492	N315	1
AATATGCAGTTCGTGAATACACTCGTTGTGAACGTTGTGGCCGTCCACATTCTGTATATCGTAAATTTAA	ribosomal protein S14	SA2226	COL	1
AATATGGATCAACAATTTGATGACACGGCAATAAATCAATATTTCAAAGAGAAAAATATTCAATTTGAGG	hypothetical protein, similar to ABC transporter ATP-binding protein	MW0416	MW2	1
AATATGGCCCTGAAGCAAGTGCATTTACGAAAAAAATGGTAGAAAATGCAAATAAAATTGAAGTCGAGTT	staphylococcal nuclease	SA0746	N315	0	1
AATATGTTTCATTTTATAATTATGGTGGTATATAACATGAATTATAACATATTGGAGGTTAAGGAAATGC	conserved hypothetical protein	SA2519	COL	0	1
AATATTAATTTAGAAATAGGTGATATTTTAATCATGATTGGACATGATAATGATTTAAATCGCTTTGAAA	TrkA potassium uptake family protein	SA1096	COL	1
AATATTATTTATATGACGAGTATAGTTTTAATGATCTTAACTTTATTTGAACAAGCTGTACCAATGACAA	ORFID:SA0640~hypothetical protein, similar to ABC transporter required	SA0640	N315	1
AATATTGAAGATTTTATTGTTTCTCGTATCAATGACTTTAATTATTATCAAGACCATATATTCTTTTTAA	isochorismatase family protein	SA1981	COL	1
AATATTGATTCTCAAGGTATGACGAAATGGGAGATCTTTAAAAAATATATCCTGGGAAATCCTGTTATAT	phosphoglycerate transporter family protein	SA0200	COL	1
AATATTGCTTTAGCTAATGAATTAACAAAAATTTGCAATAACTTAAATATTAATGTATTAGATGTGATTG	capsular polysaccharide synthesis enzyme Cap8O	SA0158	N315	0	1
AATATTTAAAAATAAAATCAGAATACCAAGATTGCTTATTATTTTTTAGACTAGGTGATTTCTATGAAAT	DNA mismatch repair protein HexA	SA1315	COL	0	1
AATATTTAATAGTGTTGATAATAACTATAAAAAAATCTTTTTAAAAGACGGTAATGTAGTTGGTGCAGTA	nitrite reductase [NAD(P)H], large subunit	SA2398	COL	1
AATATTTATTTGGACAGGTAGGTATTGATCAAATTGCAGGACCAACAGAAATAGCACTGATTATTGACGA	ORFID:SA2470~hypothetical protein, similar to histidinol dehydrogenase	SA2470	N315	0	1
AATATTTTTATATGCAGTGATAAAGTTTTTCTTTTCTGCTAAGAGAAAAAATTTTTACGCTAATAATTCT	ORFID:SA0199~truncated hypothetical protein, similar to oligopeptide ABC	SA0199	N315	1
AATCAAATCATTCATGATGAAAAACAAATACGACAAAAGTTAGACACTTATAATCAATTAGAAACACAAG	ORFID:SA0482~hypothetical protein, similar to creatine kinase	SA0482	N315	1
AATCAACACATGTATTTTTGAATGCTATTTAGCTAAAGCTAAAAGACCAGACACTATGCATATTTCAACT	conserved hypothetical protein	SA2102	COL	0	1
AATCAACATTCAATTCGTTATAGCTCACGATGGTGTATATGTTTTAGAAGTAAACCCACGTTCTAGTAGA	carbamoyl-phosphate synthase large chain	SA1046	N315	1
AATCAACTGAAAAAAGTTGAAGTAGAAGATTTACTAGGCAGAGATCCTGTTGAATTAGATATGGATATGA	capsular polysaccharide synthesis enzyme Cap5D	SA0147	N315	0	1
AATCAAGATTTAGGAACAGGTGCAGGTAATAAATCTGTAGAGGTTACTGTGAAAGGCCCATCAATGGATG	ORFID:SA2056~hypothetical protein, similar to acriflavin resistance protein	SA2056	N315	1
AATCAATTGATTAATTCAATCATAGAGAAATATCAATTTAGTAAAAAACAAATTGAAGCAGTATTAACAC	S1 RNA binding domain protein	SA2053	COL	1
AATCACAAATTAATCGAAGCAGTAACTAAATCACAATTGCGTACAGACTTACCAAGTTTCCGTCCTGGTG	50S ribosomal protein L19	SA1084	N315	1
AATCATCCAGGTGGTATCAAATCAATCACTGCTGGTGAATTAAGAAGAACTAACCCAGAACGTTTAATTG	50S ribosomal protein L13	SA2017	N315	1
AATCATTTATGCCAATTCCTATGCCTGCATCAGTAATCGGTTTAGTATTATTATTTGTATTATTATGTAC	holin-like protein LrgA	SA0247	COL	1
AATCCAAGAAGTACGTAAACGTGAATTTTACGAAAAACCAAGCGTAAAACGTAAAAAGAAATCAGAAGCT	ribosomal protein S21	SA1632	COL	1
AATCCATTAATGGCACATCAAATCGATGAATATTGTTTGACTGTAAATATTCAAATATCAACAAGCACAT	hypothetical protein	SAV2006	Mu50	0	1
AATCCTAAACAATTAATAAAAAATCCGATAATGTTTGTCGTTGAGGTTGGAATGGTTTTAACGTTGATAT	probable potassium-transporting ATPase B chain	SA1880	N315	1
AATCGATTGTTCAATTTAATAAATATACGAAATTGCCAGAAGCAATTACATTTACAGAAAATGCATCATG	glutamate synthase, small subunit	SA0515	COL	1
AATCTAAAAAAGAGTCCTATTTAAGTTTCACTGTCATTCTCTATATTTTTGGATTCGCTATATTAATATA	hypothetical protein	SAS018	N315	0	1
AATCTAAATCATGGATAGATATAAAATTAGATCATACTGAATTAAAAAGAACGATATGTGCTATTACAAA	transcriptional regulatory protein GltC	SA0513	COL	1
AATCTATAGTGTGAATCAAACTGAACATAAATTAATGTATCAAGCGACACAATTATTGCTAGATTATATT	DNA mismatch repair protein HexA	SA1315	COL	1
AATCTATGAAGATGAGAAATTTATGTTGATTGATCCAATTGAAGAAATTCAACCTGATCATCGACCATTT	ORFID:SA1441~hypothetical protein, similar to protease	SA1441	N315	1
AATGAAGCGATAAGTTTTATTAAAGACGATAATCCAGATTTAGACTTTGAATTTATTCATTGGCTAGTTT	ORFID:SA1355~hypothetical protein, similar to transcription termination fac	SA1355	N315	1
AATGATATCAATACACTATCATTATCAAAAATAGATGACGATCGAAAACTTGATGAAAAAATTCATGTTG	serine protease HtrA	SA0879	N315	0	1
AATGCTATTTATATTGGCAGTAGTTGGCGGGGCCCCAACACAGAAGCAGGCGGAAAGTCAGCTAACAATA	hypothetical protein	SA0794	COL	0	1
AATGGTATTAAATACGTAAAAACAATTCAACAAACATTTATCGATAACGACAAAAAACATAAAGCAGATT	ORFID:SA0587~lipoprotein, Streptococcal adhesin PsaA homologue	SA0587	N315	1
AATGGTATTACACATATCGACTACAAAGACACTGAATTATTAAAACGTTTTATCTCAGAACGCGGTAAAA	ribosomal protein S18	SA0439	COL	1
AATGGTCATTGTGACACATGAAATGCGTTTTGCAAAAGAAGTATCTAATAACATTGTATTTATTCATGAA	ORFID:SA2200~hypothetical protein, similar to ABC transporter, ATP	SA2200	N315	1
AATGTATTATAGTACGCTACGTGCTAGTAATTTTAATCCTGAAAATTTTAGAGCTATGGATTATATCATC	long-chain-fatty-acid--CoA ligase, putative	SA0214	COL	1
AATGTCTTTAGCTAGTTTAGCACGCTTAAAAGAAGATTATTCACTTCAATACAAAGAAAATTTTAAATAA	kinase-associated protein B	SA0956	COL	1
AATGTGTCATTTCTAGGAGGATATGAAATAAGAATTGAGTTATTAATCAGTGGTTTTATTTTTATATTGG	CDP-diacylglycerol--glycerol-3-phosphate 3-phosphatidyltransferase	SA1302	COL	1
AATGTTAGATAAAATGGTCGGTATTCAAATAGGTCAAACAACCGTAATTTTAATAGAAAACAAGCATTTT	conserved hypothetical protein	SA2361	N315	1
AATTAAAAAATTTAGTTAGCGAAGTAACTGACGCCGTAGAAAAAACAACGGGGGCAAATAGACAAGCAAT	4-oxalocrotonate tautomerase	SA1399	COL	1
AATTAAAAGATTTAACCATACAAAAAGGTAATATACATATTTTGAAGAAACTTAATTTGAAATTTCAATG	conserved hypothetical protein	SA0888	N315	1
AATTAAACAACAATTGAATAGCACTGCTGATGCCGTTCAAGAACAAGACCAACAACTTTCTAATAATTTC	conserved hypothetical protein	SA0271	COL	1
AATTAAAGGTATTCCGCAAGAATTAGCTTTGAAAAATGCCAAAGAAACAGAAGATGGACAATTTAAAGTG	glutamyl-tRNAGln amidotransferase subunit C	SA1717	N315	1
AATTAACTTAAAAGCAATGCAAGAGCATGTAGGTCATTCAGATTATAAAAAATCTAGAGATATACACACA	truncated integrase	SA0356	N315	0	1
AATTAAGAGATTTATTTAAAGAAGAAGGACTTGAACCATGGACATCATGTGAATTTGACTTTACAAGCGA	conserved hypothetical protein	SA0294	COL	1
AATTAAGCGAAATTTCAGTTGCACATGTTAAATTTTATACTGGCATTTTAAAAGATAGAGAAGTAGTGAT	5-methylthioadenosine/S-adenosylhomocysteine nucleosidase	SA1655	COL	1
AATTAAGCTATATCGATGTGTTATTAGATAAGAATGCTGACCAAGCTACAAAAGACAACTTAAGATCATA	hypothetical protein	SA0395	N315	0	1
AATTAATGGAATATCCGCCATATGATAAAGGTGAACCATTTTATGCATATTATAAAAATTTAAAAGAATA	conserved hypothetical protein	SA1252	N315	1
AATTACAATCATTGTATTAACTTTATATGCTCAATACACAAATTATGCACCTAGTGCTGTAAGAGCTATA	ORFID:SA1416~hypothetical protein, similar to ComEC late competence	SA1416	N315	1
AATTACAATTTATAACAAATTCGGTTTATGATGAAATTAACATTCATTTTAATCACCTTTCTAAAGATCA	ABC transporter, ATP-binding protein	SA1085	COL	1
AATTACAGTTTTAAAAATATATATCATGAATTATCAACGGATTATTTGGATGTCAGGGATGTAGATGCGC	molybdopterin-guanine dinucleotide biosynthesis mobA	SA2064	N315	1
AATTACATGATAAATTATGGGACAATGCACAATATTTAAAAAATGGATTGTCAAAATTAGGATATGATAC	ORFID:SA0508~hypothetical protein, similar to glycine C-acetyltransferase	SA0508	N315	1
AATTACATTTGCTTTATGGTTAGTCAGTGGTATTAAACTACTTACTAATAACAAGCCTAAAGATGAAATA	hypothetical protein	SA0292	N315	1
AATTACCAGAAGAAATACTTCAACAATTAGAAGAATCATGTCCATATCAACACTATATTAAACAGTTAAT	oligoendopeptidase F, putative	SA1419	COL	1
AATTAGAAGAATCATATGAATCTGAGAAAAAACGTATAGAGAATGAACTGCATAATTTAAATGAACTTAG	conserved hypothetical protein	SA0407	N315	1
AATTAGATGAATTAAATGTTGTGAAAAATGGTACAGTTGTCATTAAAGATGGCAAAATTGTATATGCTGG	imidazolonepropionase	SA2323	COL	1
AATTAGGACGTGATATGGACTTTAAAGTATTTAAAGATACTGTTGAAAATGATGGTGAAATTAAAGCAAT	aspartyl-tRNA synthetase	SA1685	COL	1
AATTATATTTTAGATTGTAAGTTACCAAAAGGAATTGACCCATATAAGTTCCATGAGTATTTAATTCATC	ribose 5-phosphate isomerase	SA2329	COL	1
AATTATGGTAGGCATAGATATTATCTTAATTGTACTTATCATCGTGACATTATTATTAAAATATATGTAA	hypothetical protein	SAS084	N315	1
AATTATGGTTGGTACAAACTATCCATATGTGGATTACTTACCTAAGAAAAATATTAAAGCAATCCAAATC	ORFID:SA2327~hypothetical protein, similar to pyruvate oxidase	SA2327	N315	1
AATTATGTGAAAACGGCTAAAAATGATATCTTTAAATTTGAAAAAGAATTAAAGAGACTAGGAATTAATG	conserved hypothetical protein TIGR00048	SA1230	COL	1
AATTATTAATATATTTAGCTAAAACACCAAATAAAGTATTTGACCGTGAACAATTATTAAAAGAAGTTTG	DNA-binding response regulator SrrA	SA1535	COL	1
AATTATTTATTGAAGAATATAATAACGTATACAATAACAACGAATTATGGAATGAGATTGATGTAACTGA	aconitate hydratase	SA1385	COL	1
AATTCATTAATTCTCTTGATAACGTCGAAAAGTTTGAAATTCTGCCATATCATCAGTTAGGTGTTCATAA	formate acetyltransferase activating enzyme	SA0219	N315	1
AATTCCACGTATAGTAGCTATTTTAGGAATTATCAGTGCTATGTTGACTTTTAAAGACAAGCAAATCAGC	conserved hypothetical protein	SA2134	COL	1
AATTCGCTAATGCTTTTAAAGAAGCTAGTGAACAGCTCGCAACATGGGTTCAAGAAGGTAAAATTCAGTC	ORFID:SA1989~hypothetical protein, similar to quinone oxidoreductase	SA1989	N315	1
AATTCGTGCAATTTTACGTCGTCAGCCACAAAAGGATATTATCGATGTCAACGGAACGCTTTTAAAGTGA	truncated (putative response regulator ArlR [S	SA1248	N315	0	1
AATTCTATTGATTGTCATGTAGGAAATCGTATTGTACTGAAAGCCAATGGAGGCCGTAAGAAAACAATAA	conserved hypothetical protein	SA0537	COL	1
AATTCTTTTAATTTTAATAAGTATAAGTTTAATTGTATATAGAAGGATTAAGTATAATCCACCGTTGTAT	prolipoprotein diacylglyceryl transferase	SA0826	COL	1
AATTGAAATTGTTGATTTCTTGAAAGATAATAAAAAATTCAAAGAAATGGGATCTAGGATTCCTAAAGGT	cell division protein FtsH, putative	SA0555	COL	1
AATTGATATACTAAATCCATACTTATGTATTATTTTCTGTAATAGTAGAGATAATGCAAATGATTTAGCA	ATP-dependent RNA helicase, DEAD/DEAH box family	SA1615	COL	1
AATTGGTAAAATTTATAAACTGACTGATGGCAGTAATCAATATTTTAAAGTAGAAAGATTAAAAGGTATT	conserved hypothetical protein	SA1930	COL	1
AATTGTATTTCAGAATCCGGATAATCAATTTGTTGGTTCAATTGTAAAATACGATGTAGCATTTGGACTC	ORFID:SA2021~hypothetical protein, similar to ABC transporter (ATP-binding	SA2021	N315	1
AATTTAAACAGAATGATATTTGGAAACATTTTAAAGCTGTGAAAAATAATCATGTTTATGACTTAGAGGA	hypothetical protein, similar to ferrichrome ABC transporter	MW1015	MW2	1
AATTTAAAGGAAATGTTAAAGAAACAGTAGGTAACGTTACTGATAACAAAGAATTAGAAAAAGAAGGTCA	conserved hypothetical protein	SA1680	COL	1
AATTTACAGGCATCTGAGTTATTAAAAATTGCAATCATATTATATATCCCATTTATGATCAGTAAAAAAA	conserved hypothetical protein	SA0962	N315	1
AATTTATCTATTCAGTTCTAATTTAGAAAAAATAACAGCATTTAGAGATGAATTAAAGCAAAATCATGTG	conserved hypothetical protein	SA1957	N315	1
AATTTATGGAAAATGCAATTAATTGTCTATTATTTTTGTACGGTACATTTAAAATTAAGGATCAATTTAA	hypothetical protein	SA0304	COL	0	1
AATTTATGGCACCTTTAGAATATGACACAATTACAGCTAGATCATTATTAAGCAAATTATTAGTTCGAGC	ORFID:SA1121~hypothetical protein, similar to processing proteinase homolog	SA1121	N315	1
AATTTATTAATTAACATCATGACTTCAGCTATAAGCGGCTGTCTTGTTGCGTTTTTTGCACATTGGTTAC	hypothetical protein	SA2433	COL	1
AATTTGATAAAGATGAAGTAATCAATGGTATGATATGGTCAGAAATTTTAGCTAAACCAAAACAATTATA	conserved hypothetical protein	SA1629	COL	1
AATTTGATCAAGTACAAAATTATATTAATAAAGGTATTGAAGAAGGTGCTGAATTATTTTATGGTGGTCC	aldehyde dehydrogenase	SA2114	COL	1
AATTTGTAGATAATCAATATTTTGCAGTATATAAATGGGATATTCATGGAGATTTAAAATTCAATAAACC	mannose-6-phosphate isomerase	SA2664	COL	1
AATTTGTTAACACCATTGTTATCTATTTTTATAACAGCATTTCTAACATTTTCATTTGTAGGTCCAATCA	PTS system, sucrose-specific IIBC components, putative	SA2376	COL	1
AATTTTAAAAAGGGACATGCTATATACGATAAAAAGAGGCGGGGACATAAATCAATGTTCTATGCTCTAC	hypothetical protein	MW1830	MW2	0	1
AATTTTAAATTTAGTTAAGTATGATCTTTATAGTATTTTTAAAAGTCCTTTAACATATTTAGCGATACTA	conserved hypothetical protein	MW1871	MW2	1
AATTTTAACTATGATACAAAAACAATTTGATGTTAATATCAGTGAGTCTGAAATTATATATTTAACATTA	transcriptional antiterminator LicT, putative	SA1393	COL	1
AATTTTAATATCGAATTTATCACTAAATTAGAGGGCGCACATTTAGATTACGAAAAAGAAAACTCAGAAC	conserved hypothetical protein	SA1099	COL	1
AATTTTATCAATTCTGGATTAATCAATCAGACGAAGATGTAATTAAATTCTTAAAATACTTTACTTTCTT	tyrosyl-tRNA synthetase	SA1778	COL	1
AATTTTATGGTAATTTAAAAGAACTGAGTCAATTAGATGATCGTTTCTTTAGATGTCATAATAGCTTTGT	accessory gene regulator protein A	SA2026	COL	1
AATTTTCAAGGCATTAGGCGATTACAATCGAATACGTATCATGGAATTGTTATCAGTCAGTGAAGCAAGT	repressor protein	SA1947	N315	1
AATTTTGATGTTGGTGGTGGAAATTTTACCTTTATGGAGATTGGGATAGGATTCATGACACACAAACCAA	hypothetical protein	SA0475	COL	0	1
AATTTTTAAAAGAAGTAAATCAACATAAAATTGATCAAACAAGTATTAACCTTATAGGAAGAAAAATTTA	conserved hypothetical protein TIGR00481	SA0984	COL	1
AATTTTTACTATGATAATTTATTTCGTAATATTAATGGTGCTTCCTTTATGGGCACAACACAAAGTTAAA	conserved hypothetical protein	SA1500	COL	1
ACAAAAAATTATGGAACCGATTCAACAAATAAAAGCATTACAAATTATTGAGGATGATAAAGCAAATCTC	ORFID:SA2211~hypothetical protein, similar to 6-carboxyhexanoate--CoA ligas	SA2211	N315	1
ACAAAACATCGATTTAGATGAAAAAGAAAAATCAGAAGAAACAGAAGCAACAGAAGCAACTGAAGAATAA	ribosomal protein S2	SA1274	COL	1
ACAAACACCCAACAAGCACATACACTAATGTCAACACAATCACAAGACGTATCTTATGGTACTTATTATA	peptidoglycan hydrolase	SA0265	N315	1
ACAAATATGATTACATTGTTGGTGACTATGGTTACGATCAATTACGATTAAAAGGCTTTTACAAAGATTC	conserved hypothetical protein	SA0786	N315	1
ACAAATCGTATTTAGTCCGGAAATAATGTCATGGATAGAACAACGTAGCTTGAATATACATCGAGGATAA	isopentenyl diphosphate isomerase	SA2136	N315	1
ACAAATTGAAGTTGAAGATAATGGAATAAACGTAGATGAAGTTATTAAATCACAAAAAAATATAGTATAT	transcriptional regulator, GntR family	SA0563	COL	1
ACAAATTGCATGGTGAATACGCGAAAGCATATAAAAAGGCTGTAAACTCAGAGAAAACATTATTTAAATA	conserved hypothetical protein	SA0943	N315	0	1
ACAACATAGTCAGCTTCATGAGAATGAAAATGTTGCTAATGAGTTAATCGACTTCTTATGGAAAAAATAA	conserved hypothetical protein	SA1990	N315	1
ACAACTTAACTAATGTTGATGTTATAGGAATAGACGAAGTGCAATTTTTTGACGATGAAATTGTAAGTAT	thymidine kinase	SA1921	N315	1
ACAAGAAAACTAAATTAATTCATGGTGGGCACACAACAGACGATTATACAGGTGCCGTTACAACACCAAT	trans-sulfuration enzyme family protein	SA0503	COL	0	1
ACAAGCATATGGTAGTTTTAGTAAATTTTTATGGTCTTATGTAAATGGTAAGCCTAAAGATTTGCAGTAT	DNA-3-methyladenine glycosidase	SA1489	N315	1
ACAATCATCATCTTGTTCGTCTTTTTATTACTACTTATTGTGCGTTATTTAATACATAAATTTAAACCAA	conserved hypothetical protein	SA1702	N315	1
ACAATTTATGATTTTGTAGTAGAAACAAATAAAGGTGTTACTTACAAATTAGATGCATATAAGGGTGACG	glutathione peroxidase	SA1325	COL	1
ACACAAAAAACTGCAAGAGCATCGTATGGCAGGCACTAATATTGATAACATTGAAGTGAATATAAAATAA	exotoxin, putative	SA0470	COL	0	0
ACACAAAACAATAAATCATCAATTTGTGCAATCACCAGTCACATGTACTAAAGCAGAGTTTATAAAACGT	ORFID:SA2368~hypothetical protein, similar to cobalamin synthesis related	SA2368	N315	0	1
ACACCAAATTCTTATCGTTTTCAAAAGCATCTAGATCATGAAGTTTTAATTCGTACATCTTTAATTGTTC	holliday junction DNA helicase	SA1468	N315	1
ACACTTATTACAGGTGGCTTACTAATTATTTTTCGACTTTGGTTAGAACTGAAATGGAAAAATAAAAAAT	conserved hypothetical protein	SA1999	COL	0	1
ACAGCAATTTAGATTCAGGAGAATATCGTTTATTAACTGAAAATGATTTTGACAAATTAAATTATAAATA	pseudouridine synthase, family 1	SA1803	COL	1
ACAGCGACTCAGACTCGGATAGCGATTCAGATTCAGACAGCGACTCAGACTCGGATAGCGACTCGGATTC	Clumping factor B	SA2423	N315	0	1
ACAGGCGCTCGAAAACAATGACGAACACATTTACTTTATCAATCATTTTAAAATCAAAAGAGAAATATGA	putative vacuolating cytotoxin paralog	SAV1119	Mu50	1
ACAGTAGGTTATGTTGAATTCGTAAGTCCAGATGAAGTTAAAGTGGATGATGAAATTGTGAGTATCGAAG	glycine cleavage system H protein, putative	SA0395	COL	1
ACAGTATCGCACAAGCAATGCGAGATAAAATTGACGAAGCTAAAAACGATGGTGATTCAATAGGGGGAGT	chorismate synthase	MW1356	MW2	0	1
ACAGTCATAATGAAACATTGATTCTTTCTCATTATATTTTTATGAATGAACTTAAAATTAATTTACTAGA	chromosome replication initiation/membrane attachment protein	SA1508	N315	1
ACAGTTGATTCACAAATAATAGATAAAACAAAACTCATTTATTTAACGTATCCAAATAATCCAACTGGAT	ORFID:SA2347~hypothetical protein, similar to aspartate aminotransferase	SA2347	N315	1
ACATAGAACATGCCGTCATAAATATTTTTAATTCTAATAGAAAAGTCTTTGGTACAAGACGAATTAAAAA	transposase, putative, degenerate	SA1855	COL	1
ACATATGGATTTTACAATCACTGAATTTGAAAGAGATGCATGGTTAGAAAATATGCAGACAGCAATTAAT	conserved hypothetical protein	SA0861	N315	1
ACATATGTTTTATACAGAAGAGACATATGAAGAAATTTTCGATAACTACGATATAGATTATTTTGTAGAT	HesA/MoeB/ThiF family protein	SA1683	COL	1
ACATATTTACAGTATTTATCGGAAAATGATGAAGCAGAAAAAACAATTTGATCAAATTTTTGATTTGTTG	GTP pyrophosphokinase	SA1689	COL	1
ACATCATTACTATACAAATTATTTTCTCCAGTATCAGAAATGATTATGAATTCAGTACAATCATCATATG	lytic regulatory protein, authentic frameshift	SA2140	COL	1
ACATGATTGTGGCATTAGAGTGCTGGTCTTTATTAAATTAATTGAAAGCTACATCAAATATTCTTTAGAT	hypothetical protein	SA0919	COL	0	1
ACATGCAACAAGGTCATATGCAATCATCAAACCATCAAATGAACCAAAGTAACAAAAAAGTTTTACCAGC	putative surface anchored protein	SAR0136	MRSA252	0	1
ACATGTTATGCATATCGTAAGTGAAATCACAGGTAAAATAAATCAAAATTTATCACCAATGACAGTTATT	ORFID:SA1199~hypothetical protein, similar to anthranilate synthase compone	SA1199	N315	1
ACATTAGAATTAACAAAAATTAAAGAAGTATTACAAAAAAACTTGAAGATTTTAATTATTTTACCGCTAT	capsular polysaccharide biosynthesis protein Cap5A	SA0136	COL	0	1
ACATTATATGAAGACGAAAGATATTAATGTAAAGCCTATTATTTCTCATTTTTTACCGTTAGAAAAAGGC	hexitol dehydrogenase	SA0235	COL	1
ACATTATGTATGGACAAGGTATTTCTAAAGAGGGTGAACTTATTGATTTAGGTGTTGAAAACGACATCGT	RecA protein	MW1168	MW2	1
ACATTATTTACTTCACCAAGTTGCACATCTTGCCGTAAAGCGAAAGCATGGTTACAAGAACATGACATTC	conserved hypothetical protein	SA1002	COL	1
ACATTGCTTGATAATAATCCAATAATTGTTAAAAATCCTGGAATACCTTATACAGTATCTATTATTGATG	UDP-N-acetylmuramoylalanine--D-glutamate ligase	SA1026	N315	1
ACATTTACTGCTAAGGAGCCATTTAATCAACTTGGTGGTTATCCATATTTTGACCAAATAGATCCAAGAA	truncated conserved hypothetical protein	SAS022	N315	1
ACATTTATTAATAATGAATCTATCATTCTTCATGTTTCATACCACAGTTTATGGCATCAATATAACAATT	ORFID:SA0882~hypothetical protein, similar to competence transcription fact	SA0882	N315	1
ACATTTGACAAAGGTTTTAGATACACTAACTGGAATATGCGTAGTATTATTATTTAGTAAATATTTTGTG	hypothetical protein	SA1015	N315	0	1
ACATTTGTAAAAAATTATCTAAATGAGCATCAAATTGATTTTGAAGAGAGAAATATCAACAATCAACAAT	conserved hypothetical protein	SA0936	N315	1
ACCAAGGTTCAGATGTACAATCAGTAAGCTACAATGCACAATCAAGTAACTCAAACGTTGAAGCTGTTTC	immunodominant antigen A	SA2356	N315	1
ACCAATTAGTAGACATTATTAAAAAACATAATGTGGGTACAGTCGTAATAGGACTACCTAAAAACATGAA	conserved hypothetical protein TIGR00250	SA1671	COL	1
ACCACATGGATTAATAGTATCTTGTCAGGCACTAGCAGATGAACCATTGCATTCATCTTTTATTATGTCG	conserved hypothetical protein	SA0307	N315	1
ACCATCTAAACACATCGATCAATTAATTCAAACTTTAAACATTAATCATTTGATGAAACAATATCCTATG	molybdenum transport ATP-binding protein ModC	SA2072	N315	1
ACCATGTAACTGAAGATATCGGCATTGTCATTGGCCAATTGTTACTTGAAATGATTAAAGATAAAAAGCA	imidazoleglycerol-phosphate dehydratase	SA2468	N315	1
ACCATTTAATGACAACAATTTTACTGAAAGATTTAATGAAGCATTTATTAGAATTTTATAAAAGAGGGTG	PTS system, lactose-specific IIA component	SA1993	N315	1
ACCATTTCAAATCGTAGGCATCATTCTTATTATGATTTTAATTTTATTACTATCACTTAAAAGACAACCT	conserved hypothetical protein	SA2548	COL	1
ACCCAAAAGAAAATATAGCGAAAGTAAATCAAGAATTGAATGAACTTCATGCCGAAATAGCTAAATGGCA	FmhB protein	SA2057	N315	1
ACCCAGGTGCAGGCGTTCCTATTGTCTTAACAAGTGCGAAAATAACTGTAGACGAAATGATTAAAGATAT	squalene synthase	SA2348	N315	1
ACCCCTAATTGGAAAAAAGGTTATTGTCAAAGGCAAAGAGGTAGGATTGTTTTTAACTGAAAGTGGTACA	assimilatory nitrite reductase	SA2187	N315	1
ACCGAAGCAACAACCACAAACTAAGCCCGAAAAGAAGACTGTTTCGAGAAAAGTGGTTGTACAATTAACT	cell division protein FtsL	SA1193	COL	1
ACCGATCTGTTAAAAATTCTGAAAGACGTGGCATGTTAAAAGGATGCGGCGGTTGCCTTATTTCTTTCAT	hypothetical protein, similar to latent nuclear antigen [Kaposis sarcoma-as	MW1737	MW2	0	1
ACCGCTATAAAACTGACGCTTCATTTTGGAAAGCAGTTTATAATTCCATCCTAAATAAATTAGAAAATAA	conserved hypothetical protein	SA1992	COL	1
ACCGGCAAACCAAGCAGGACAAGGAAATAACCAAGCAACACCGGCAAATCAAACACAGCCAGCGAATGCT	truncated FmtB	MW2087	MW2	0	1
ACCTAGATATTAAAACAATTAACGATTACACTACGCCTAATAAATTACTAGATAAAGGTGAAATTGACGC	conserved hypothetical protein	SA0771	N315	1
ACCTAGTTAATCTTTGCAAAATAAATAACATTCCATATAAAGTAGACATATATCCATATTATGGTTCAGA	glutamyl aminopeptidase, putative	SA1402	COL	1
ACCTCAATCACTATTATCCAAATCATGAAGGTATTGATTTTTATCATCGTTATAAGGAAGATATTGCCTT	6-phospho-beta-glucosidase	SA0256	N315	1
ACCTCTATCTATTGATGACATGAGTATGATTGTAGACAAAATATTAACGCAATTAAATATAAGATTATTA	ClpB chaperone homologue~ORFID:SA0835	SA0835	N315	1
ACCTTACAAGGAACAAACACTTTATTTCGACCAATATAGCGGTAAAAAGCTAGGTACGATTAAATATGAT	conserved hypothetical protein	SA1275	N315	1
ACCTTATTTATTATTGCAACCATCGCATCGTTTATAGGGCTGTTAATTTTATATTATATCTGCCGTTTGA	ORFID:SA2301~hypothetical protein, similar to alkaline phosphatase	SA2301	N315	1
ACGAAACAATTATGAACATTATCGACCATATTCGCAATGTAAATGGAATTAATAATGATGATGTGATTGT	ORFID:SA0241~hypothetical protein, similar to 4-diphosphocytidyl-2C-methyl-	SA0241	N315	0	1
ACGAAGTCCCTATGCGTATTAAGGAATTTGAGTTATTGTGGTATTTAGCTTCTAGAGAAAATGAAGTTAT	DNA-binding response regulator SaeR	SA0766	COL	1
ACGACTACAAAAAGTTTAAAGTGTTTTCACTTATTTCAACACTTGTCATTGTCATTTTAGCAATTATAAG	hypothetical protein	SA2376	N315	1
ACGAGTGTATCATCATTTTTATTGATTTCATATTGGTATAACAACGGAGATAGTCAATTTGGTGCGATGC	protein, similar to NADH dehydrogenase ORFID:MW0585	MW0585	MW2	1
ACGGAAGAAATTAATTTCTTTATTGACGGCTATGTTAAAGGGGATATTCCTGATTACCAAGCATCAAGTT	pyrimidine nucleoside phosphorylase	SA1938	N315	1
ACGGAATATGAAATTAATAAAGTTAAAGAAATCGAGCAATATATTAAAGAGCAAGAAGAAGCTGAACTAT	hypothetical protein, authentic frameshift	SA0288	COL	0	1
ACGGGGGTATTCCTGATACTGGCTTTTATCGTTTCTGGATACAAGGTATTTTTGCGAGATGGACAGATAA	conserved hypothetical protein	SA2380	N315	0	1
ACGGGTAAACTCAGTTGAATATACAAACGCAGGACCAAAAGTACACACAAATATCTTTGACCAAGATGAA	ORFID:SA0223~acetyl-CoA acetyltransferase homologue	SA0223	N315	1
ACGTAAAGCTAGATTAGTGTCTAAGAGCGATATGAAACGTGTAAAACAATTATTAGCATACAAAAAATAA	ribosomal protein L35	SA1726	COL	1
ACGTACTTTAGATATAGGTGGAGATAAAGAATTATCATACTTAAACTTGCCTGAAGAAATGAATCCATTC	phosphoenolpyruvate-protein phosphotransferase	SA1092	COL	1
ACGTGAAGCCATCAAAGAAACAGTTAAAGGTAAAATTAAAGAGTTCGGTACTTCAAACCGCGCTAAATAA	fructose-bisphosphate aldolase	SA1927	N315	1
ACGTTAAACCTATTTTAATAAATGAAAATATCGAATTCATTGAACAACACGAACACGAAATTATAGCAAT	conserved hypothetical protein	SA0624	COL	1
ACGTTGAAGTTAGCAGAAGAACATCAAATATACGATGTCTATAGTTTTACAGCAGAAGCAAATAAAGCCT	conserved hypothetical protein	SA0634	N315	1
ACTAACAAGTGATTGGGCAATAACATTTTTAACAATTTTAATTATTATAACTCCAGGGTCTACAGTAATA	ORFID:SA0582~hypothetical protein, similar to Na1/H1 antiporter	SA0582	N315	1
ACTACCAATTGCATTGGACTTCAACAAATTGGAAAGGTACCAATACTAAAGATAAATGGACAGATCGTTC	Alpha-Hemolysin precursor	SA1007	N315	0	1
ACTACTACAATGGCTACAATAACTATAACTACAACAATTACAACAATGGTTATAGCTACAATAATTACAG	secretory antigen precursor SsaA homolog	MW2217	MW2	0	1
ACTACTCTTAGTCGGCAATGTCGAAGTGACAGGATTTAAAATGCTTAAAAAAGATCTAAAAGGTGTAAAC	hypothetical protein	SA2055	N315	1
ACTATAAAACAATCTCAAAACGAATCAAACGTATTTCTGAAATTGAAAAAATGGAAGAAGATGGTTTATT	30S ribosomal protein S2	SA1099	N315	1
ACTATAACGATATTGAGAAAGATGTAAGTAAAAACAAAGGCGATAAGAATGTTCAATCGAAATTAAATCA	hypothetical protein	MW1483	MW2	1
ACTATAATAAGCATAAATATTTAGAACAACAAGAAATGTTAGGGAAAATTGTTGGTAAAGAAGATAAAGT	iron compound ABC transporter, iron compound-binding protein	SA2277	COL	1
ACTATATGACTGCATTTTGGAATATTGTTAACTGGAAAAAAGTTGATGAATTATACCAAGCAGCAAAATA	superoxide dismutase	SA0128	N315	1
ACTATCAAATATTTAATACAGCTTTTAGTGTGAATAAAAGTGGCCAGCTGATTAATGAATACGACAAAGT	hypothetical protein	SA1841	N315	1
ACTATTAAAACAATACAAAAATGTAGAATTCAATGACAAAATATTAATCAATTGGCGCATTATGCAAGAG	hypothetical protein	SAR1882	MRSA252	1
ACTCAAAGTGCTTTTAATAAAGAAGGGAAAGAGACGCAATTAATGTATACTGCTACATTTGATGTTAAAC	conserved hypothetical protein	SA0358	N315	1
ACTCAAGATGATAAAAATACAGTAAATAAATTAAGAGATGGTTATCTTTTAAGTGATAAAAAATATAAAG	hypothetical protein	SA0851	COL	1
ACTCAGACTCAGATAGCGACTCAGATTCGGACAGCGACTCAGATTCAGATAGCGACTCAGATTCGGACAG	putative surface anchored protein	SAS0519	MSSA476	0	1
ACTCAGTTGTATTACGTCACTCTCGTCGTGTAAGTGGTATTACAGATTTATCTATTAACTCAATCGATGT	adenylosuccinate synthase	SA0016	N315	1
ACTCGAAGCCTTTCATGTAGCAAATAAAATGCATATACTGGGGCCCCAACAAAGAGAATTTCGAAAAGAA	hypothetical protein	SAR0779	MRSA252	0	1
ACTCTAAAGAAAATACATTAATTTCTTCTAAAGCTGGAGATGTAACAGTTGCAGATACAATGAAAAAAAT	ORFID:SA1659~peptidyl-prolyl cis/trans isomerase homolog	SA1659	N315	1
ACTCTCTAATTTATTGCACGAAGAATGTGTTGAACATGATGTGCAACCGATTCTAGATGTTGGCATTTTC	conserved hypothetical protein	SA0227	N315	1
ACTGAAAATTATGATACATTATTATTAGGGATTGAAATGTCGCGTAAAACATTATATTCAAGAATAAATA	tRNA delta(2)-isopentenylpyrophosphate transferase	SA1323	COL	1
ACTGAAAGAAAAAGTTATACCTAACGTTATGGAAACATTAAATGATGGTGCATTACATATCGCTGAAGAA	hypothetical protein	SA1500	N315	1
ACTGATGCGTTAATTGAATCTTTATTTATTCAGTTCGCTTATTTTTCTTGGATTTCTTGTATATCATTTT	IS1272-related, transposase, degenerate	SA0260	COL	0	1
ACTGCGTTGTATCAGCTTAAAAATGAACAAATTGAATATAAAAATGATGTAGAGAGCTACTTTTTAACAT	ORFID:SA2417~hypothetical protein, similar to two-component sensor histidin	SA2417	N315	1
ACTGGCAGAAAAATATGGCATCGATGGTGTCATGATTGGTAGAGGCATTTTCCATAATCCATTCGCTTTT	conserved hypothetical protein	SA0085	N315	1
ACTGGTTGGTAAAGCAAAAGATTTACCGCACCAACTCGGAAACCAACTACATCAGCTGCCAAAGATTTAA	autolysin	SAV1053	Mu50	0	1
ACTGTAGAAGTGAAAGATGGTATGGGGAAAACAGCATTTTTATTTAATGCTTTAAAATCTGATGATATAG	ORFID:SA0678~hypothetical protein, similar to choline transporter	SA0678	N315	1
ACTGTTTTTATTTTAATTATTGTATTTATAATCCAATTCATTGGGGATTGGCTTACAAATAAACTTGATA	conserved hypothetical protein	SA0770	N315	1
ACTTAACATCATGAAATCTAAATGTTTAATTATATTAACTACCCATCATTTAGATGAAGTGGAAGCACTT	conserved hypothetical protein	SA0266	N315	1
ACTTAATATAAGGAAAATAGCAGCTCAACGAGCTGTACATTATAAAATACATATCAAAAAAGCTGATTTC	IS1272-related, transposase, degenerate	SA1425	COL	1
ACTTAGATTTAGTTTATTCAGATACATGGTTAGAAAAAATGAAATCAAGACAAGGAGTTAAATCAGAATG	cysteine synthase/cystathionine beta-synthase family protein	SA0100	COL	1
ACTTATTTGGAATTAGTGCTTGGGGCGCTAACAAATATAAGAACTCTGATAAACAAATATTTTTAATGTA	sodium:alanine symporter family protein	SA1392	COL	1
ACTTCTCAGCAATCGCTGAAGATGGATACAAATCATTAGAAGAAGGCCAAAAAGTTGAATTCGACATCGT	cold shock protein, CSD family	SA0861	COL	1
ACTTTAAATTTGTTATGCCTATTTTTGGGAAATTATTTGCAAAATCAAAAGAAGAATATGAATGGTTACA	menaquinone biosynthesis methyltransferase	MW1360	MW2	1
ACTTTGAATTATGAGGTTTACAAATACAATACCAATGACACGTCAATTGCTAATGACTATTTTAATAAAC	NPQTN cell wall surface anchor protein	SA1141	COL	0	1
ACTTTGTCAATCTTTGATTGATCAATTTAATGGAGAAATACCACAAACACATAAGGAATTAGAAAGTTTA	endonuclease III	SA1492	COL	1
ACTTTTTAATGAACCATGATGAAGGTATGTGGAAGCTTTCTTCTGATGCTTTACATCAAGCATTTAATTA	conserved hypothetical protein	SA0561	N315	1
AGAAAAAAGTAATGCAATGATTACGAATGAAATTAATCATTTATGGATTATGGATCCCATTGATGGAACT	hypothetical protein, similar to suppressor protein suhB	MW2231	MW2	1
AGAAAAAGCATTAAGTAATAATCATATTCCAGAAAATGTATATGACAATCTAGTAAAAACTGTACATAAA	ORFID:SA0859~thimet oligopeptidase homologue	SA0859	N315	1
AGAAAATTTTAATATTAACTAGTATTATGTTAATCATATTAATTAGTGTTGCAAGTATCTATTTTAAAAT	hypothetical protein	SA2264	N315	1
AGAAACAGATGGTTATATCCTTAAACATGGTGTTATGAAAGAACATGCATCATCTGTATTTAATGGTATC	conserved hypothetical protein	SA0775	N315	1
AGAAATCAATGATATTTTTGAAGAAATGGAAAAGGGTACTATAACTGGTAGAATGGTTATTAAATTTTAA	alcohol dehydrogenase I	SA0562	N315	1
AGAAATGATTTTAAAAATTGCTGTCCCATTATTGACATTAATATATCCCGTGTCTATTGCACTTGTACTG	hypothetical protein, similar to branched-chain amino acid uptake carrier	MW0283	MW2	1
AGAAATTAAATTAGCTGATAATAAAAGTGAAGCAACTAATCTTACGACAAAATTAGAACATAATAATAAA	lipoprotein, putative	SA0803	COL	1
AGAACAAATCAAAAAGAGCTTTGCGAAAACATTAGAAATGTATCCAATCAAAAACCTCGAAGATTTATAC	putative lipoprotein	SAR0444	MRSA252	0	1
AGAACTAAAAAAGGCTCTATGTCAAATTGGACTGATGCGTTCAATATCCGAAGTTAAGCAACTAAACATT	hypothetical protein	SA1856	COL	0	1
AGAAGAGGTTAATGAAATTTCGCATAACAATGGGACACTAGTGATTTATGATGAAGTAATTACTGCATTC	glutamate-1-semialdehyde aminotransferase	SA1681	N315	1
AGAAGCAATAAAAATTGTAGCAAGTTTAACGAACGGTAATGAGCAATTAACTAACATGATTAGTACAATG	ORFID:SA0875~hypothetical protein, similar to cell wall synthesis	SA0875	N315	1
AGAAGCTAATGTCATTATAAGCAATTCAACTGGAGGGAAAGAAATGCAAGTAAACAAAGTTATTTATATT	conserved hypothetical protein	SA1226	COL	0	1
AGAAGCTGCAATGGAAATGGGTTAAAGGCATCATTGAGGCGTATCAAGAAGCATTTCCAGAGCTGAATAA	putative siderophore biosynthesis protein	SAR0124	MRSA252	0	1
AGAAGGATCAACTTAATATAATGAATTCGGCAACAGAAGAGCATCATCATAAAGATTATATTAAACTATA	hypothetical protein	SA0740	N315	1
AGAAGTTAAGTCAAATGTACAACGAGATTGCGAATGAGATCAGTGGGATGATACCGATAGAGTGGGAAAA	conserved hypothetical protein	SAR0293	MRSA252	0	1
AGAATATAAAAATGATACATTATATGTCAATGGTAAAAAACAAGATGAACCATATTTAAACTATAATTTA	type-1 signal peptidase 1B	SA0826	N315	1
AGAATGAAGAAACTGTCTTATGTGCAGACTTAATTGCACCTGAAGGATACGGTGAAATTATCGGTGGATC	asparaginyl-tRNA synthetase	SA1287	N315	1
AGAATGAGAAAAAAAGAAAGATCATTAGACAATATGTCATTGAAAAACGCTGAACTACTTTATAAATTTG	hypothetical protein	SA1017	N315	0	1
AGAATTTCTTTTTGAAATTCTCTATGTTGGGGCCCCGCCTATAATTGAAAAATGCTTGTTACATGGGCAT	hypothetical protein	SA1176	COL	0	1
AGACCAACTCGTTGAATTAATTGAAAATTATTCATCACATGGATTAATGATACAACGATTTGGAACGACG	conserved hypothetical protein	SA1325	N315	1
AGACCTACGAGATTACGACAATATATTGGTCAAAATTCAATAAAAAGTAATTTAGAAGTATTTATTAAAG	Holliday junction DNA helicase RuvB	SA1696	COL	1
AGACGGCATTCGATACGGTTGCAAAATATGATCAAGTAAGACAACCAAATGTAGTTGCGAAACTATATAA	conserved hypothetical protein	SA2175	COL	0	1
AGACTATGATTTAGATATTAAAGTATATCCAAACGGAAAGTATCATTTATTAGATGAAGATGAATATGAG	conserved hypothetical protein	SA1925	COL	1
AGACTCGGATAGCGACTCGGATTCAGATAGCGACTCAGACTCAGATAGTGACTCCGATTCAAGAGTTACA	clumping factor B	SA2652	COL	0	1
AGACTGATGATAAAGAAGAAGTAGAAATGTTAAAAGAGGAGAGTAATGGTATTAAAGCTGAACTTCCAAA	peptide chain release factor 1	SA2110	COL	1
AGAGAGGGTAAATTGAAAGTATCATTTGATTATATAGATTGGATAAATACAGAGTTTGATCAATTGGGCC	conserved hypothetical protein	SA0282	N315	0	1
AGAGCAAACCTACCACTAGTGAAGCACCACCTAGTCAAAATAATCACAACGAAAATAACATGTATGATGC	conserved hypothetical protein	SA1618	N315	0	1
AGATAATATTCCTAAGGATAGTAAATATGTCGTAACTTGTACGCATGAAAGTTATAACGAAGTTATTATG	ORFID:SA1548~hypothetical protein, similar to acylglycerol-3-phosphate O-ac	SA1548	N315	1
AGATACATCATAGAACGCATTTTACATACAAATGATGAAAAACATATTCATATTTTGAAACCTAAAGATG	hypothetical protein	SA0164	N315	0	1
AGATATTACGGTATATAATAAGACGATTGACTGTTTAAATTATTATAACTATAGTGACGAAAGAATAAAG	conserved hypothetical protein TIGR00488	SA1649	COL	1
AGATATTACTAATGATTTAAATTCTGAAGATATTGAAAATGTAAGGCAAGTATTAGAAGTCATCAATCAT	transcriptional regulator TcaR	SA2353	COL	1
AGATATTACTTTGCCAGAATTAGGTAGAGAATTAGAAAATATTACAGGACATACGATTGCTGATTCTACT	conserved hypothetical protein	SA0738	COL	1
AGATATTGCAGAAGCGGTATTGTATGCATTAACACAACCAAAGCATGTTAACGTGAATGAAATTACAGTG	ORFID:SA2266~hypothetical protein, similar to oxidoreductase	SA2266	N315	1
AGATGAAAGTACAACAGTAAGTGGAAATAATAATGCTCATAGTGTGATAGATGATTTGATGAGTAAGAAT	hypothetical protein	SA2603	COL	1
AGATGAAATCAGTGGAATGATACCAGTAGAGTGGGAAAAAGTATATACAATTGCTTATGTAGATGATGAA	hypothetical protein	MW0279	MW2	0	1
AGATGAGTATCAAGATACTAATAAAGCACAATATACATTAGTTAAATTATTAGCAAGTAAGTTTAAAAAC	ATP-depentend DNA helicase	SA1721	N315	1
AGATGATATTGAATCAATTAGAATTACTGAAAACAGTGGATTATCGTTTATATTCACTTTACAAAAATAA	conserved hypothetical protein	SA1447	COL	1
AGATGTAACACATCAAGTTTTAGCCGACAATCACGTGATTGAACGCTTTGAAAGTATCAATAATCCTGTT	ORFID:SA0234~hypothetical protein, similar to inosine-uridine preferring nu	SA0234	N315	1
AGATGTACGCTATTTATATGATTATAATGAGCAAGAATTAATAGACTTGGCACAAAAGGCACAAATATTA	conserved hypothetical protein	SA0782	N315	1
AGATGTTAACTTTTATATAAACAAAGAAACTGGCATACCTATTGTAGATATTCCAGGCGGTCACTTAGGT	conserevd hypothetical protein	SA2367	N315	1
AGATTCAACCTTGAATTTATTAATAATAACGCTAAATCTGTTATTTCACCAATTATAATTACTAACACTG	PTS system, glucose-specific enzyme II, A component	SA1255	N315	1
AGATTCATTAAAAAATATTTATACTGTTACTGAAGGTTTTGAAAATCGTTTGAAATCTAACATTTATGAA	conserved hypothetical protein	SA1135	COL	0	1
AGATTTAAACGAAATTAAAGAAGTATTGAAAGATCACCATCATAATCAAAATGCAAAAATGATTATTAGT	alanine racemase family protein	SA1434	COL	1
AGATTTAATCAGACAATGTAACAAATTAGGTAAACCAGTTATTACAGCTACACAAATGTTAGATTCTATG	pyruvate kinase	SA1745	COL	1
AGATTTATTTAGCAAAGAAGAATGGCTAAGTATGTCTCTTGCAGAAAGACAAAAAGCTGAAAAAGCATTT	hypothetical protein	SA2267	N315	0	1
AGATTTGACAATGTTATTAGACGAATTAAAAGATATGTCCTTTTTTAATAAAGGAGATATATGTTTAATT	conserved hypothetical protein TIGR01440	SA2106	COL	1
AGCAAAAGCGGTTGCTAGAACAATAAGAATCGCACCTCGTAAAGTAAGACTAGTTCTTGACTTAATCAGA	ribosomal protein L22	SA2234	COL	1
AGCAAAATCTTATTGATGATAAATCAATTTTTATTGATGGTACAAAAGTAGAAGCTAGTGCCAATAGATA	putative transposase	SAR0963	MRSA252	0	1
AGCACACGGAGGTTTTCTATATGAATAACGGTACAGTAAAATGGTTTAACGCAGAAAAAGGTTTTGGTTT	cold shock protein	SAR2790	MRSA252	0	1
AGCAGCTTGAAGATCAACATTTCCTAGAAGATTATGATAAATTTCAAAATGAGGTTACTCATCGCAATTA	hypothetical protein	SA2139	N315	1
AGCATCAGATATAATTAATAATTTGCGGAATTTTGTTTCTAAAAATTTTGACTATTCCGACAGAAAGTAA	ORFID:SA2174~hypothetical protein, similar to transcriptional regulator	SA2174	N315	0	1
AGCATTATATAGCGAACGTACAGATGAAAAAATTAAGTTTAGAAATCATACTATTAAGCCTGAAAGCATG	hypothetical protein	SAVP003	Mu50	0	0
AGCATTTGAATATTTAGTTGATTTAAATGAAAAAGTTGGTGCGCATTATCCATCCATGTATCAAGATTTA	ORFID:SA2232~hypothetical protein, similar to 2-dehydropantoate 2-reductase	SA2232	N315	1
AGCCAGTTGAAGTATTATTGGCAAATATTCCTGATTTCAAAAATCCTTCACAATTTCAAGGATTTATGAC	conserved hypothetical protein	SA1534	N315	1
AGCCTGAATATCAAGAACATCAAGATAATTTCGAAGAAGCATTTGTTGTTAAGCAAATTTTACAACATTT	conserved hypothetical protein	SA0481	N315	1
AGCCTTAAGAAAAGCTTATCTTGAGAGTTTTAGAAAAGGGTTTAAACAACAAATTGAAAATACTAAAGTA	conserved hypothetical protein	SA1376	COL	1
AGCGAATTTCTTAAATCTAGAACGTCATATAGATGTCTTTGCACCTAATGATATTGTAAATGAAGAGTTA	conserved hypothetical protein TIGR00147	SA1958	COL	1
AGCGGATAAAAGTGTGGCTGTATCAAATGAAGAGTCAAAAGCATCGGCATTAAAAGTACAACAAGCAGCA	ORFID:SA1559~hypothetical protein, similar to smooth muscle caldesmon	SA1559	N315	0	1
AGCGTAAGGCTAAGTATGTAAATGAATTAGGTTTACCTGCATACGATGCACACGTATTAACATTGACTAA	glutamyl-tRNAGln amidotransferase subunit B	SA1715	N315	1
AGCTAAAAAAGCAGCTCAACTAGGCGAAGTACCTATAGGTGCTATCATCACTAAAGATGATGAAGTTATC	cytidine/deoxycytidylate deaminase family protein, authentic frameshift	SA0605	COL	1
AGCTATTTAAAATCAACAGTAGATGTTAACTTTGAAGGTTTGAAAATTGTTTTAGATGGTGCAAATGGTT	phosphoglucosamine-mutase	SA1965	N315	1
AGCTTAAAAGTGTCCAATATGATTTACAAAATATATTAGATGGCGTAACAAAAGAGGGTACTTATGGTTA	conserved hypothetical protein	SA1281	N315	1
AGCTTATAAAGCAGCTGAGTTACAAGGTCGTGTCGAAGACAGAAAAGATTTATACATACACATGCTATAA	conserved hypothetical protein	SAV1002	Mu50	0	1
AGCTTTTTTCAACCATCTTTGTGGAATTTAGTTATCTCAATTACAGTAATAAAATGGATGAATTACACAA	oligopeptide transporter membrane permease domain	SA1213	N315	1
AGGAAAGCTATCATTTATTCGATAAAGCAATGTTTGATCATGTGAAAAAAGGTGCAATTTTAGTTAACGC	D-specific D-2-hydroxyacid dehydrogenase	MW2444	MW2	1
AGGATATACAAGTCATTTTAGAGATCCTAAAGTTTTTAAATATGGTGAGAAATATTATGCAATCATTGGC	sucrose-6-phosphate hydrolase	SA1846	N315	1
AGGATATCAATATATGGGAGATAGTATGTTCATCGGAAGACCTGTTCATATTATGGCGTTAACTATAAAA	conserved hypothetical protein	SA0426	N315	1
AGGATTATTAATATTTTTAGTAGTTATTTTACATAACGTATTAGGGTATACGATTGGATATTGGTTAGCT	sodium/bile acid symporter family protein	SA2314	COL	1
AGGCGGTGGATCATACTACACAGTACAAGCAGGTGACTCATTGTCATTAATCGCATCAAAATATGGTACA	ORFID:SA0423~hypothetical protein, similar to autolysin (N-acetylmuramoyl-L	SA0423	N315	1
AGGTAAGAAATTATTACAGTCAGTGCCACTCGTTACATACATTGTAATGTTTATATTGAATATAAATCAC	conserved hypothetical protein	SA2054	N315	1
AGGTATCGCTAGCGATGGCTACAAAACTTTAGAAGAAGGTCAAAAAGTTACTTTCGAAATCACTGAAGGT	cold shock protein, CSD family	SA2731	COL	1
AGGTATGCCAATCGGTGCGAAAGTAACACTTCGCGGTGAAAGAATGTATGAATTCTTAGACAAATTAATT	ribosomal protein L5	SA2227	COL	1
AGGTTATAACATTGATAAAGAAGCGCAAATAGATTTATTTAAACAATTCAAGACCATTGCGGACAAAAAG	2-isopropylmalate synthase	SA1862	N315	1
AGTAAAATTACAGAACAAGTAGAAGTGATTGTTCAACCAATTATGGAAGACTTGAATTTTGAACTTGTAG	conserved hypotehtical protein	SA1108	N315	1
AGTAAACGAATACTATTAAAAATATTATTAACCATTCTAATCATTATCGCATTGTTTATTGGTATCATGT	transglycosylase domain protein	SA1932	COL	1
AGTAAATCATCCTAAATATGATATTACTATTGAAAAAGATAGTGATGATCTAGACGGATTAAATTATTTG	glucose-6-phosphate isomerase A	SA0823	N315	1
AGTACATCAAGCACGCATCATTGCAGGCACACAAGAACAGGTTAAAGCACAATTAGATGATTTCATTGCT	ORFID:SA0312~hypothetical protein, similar to alkanal monooxygenase alpha	SA0312	N315	1
AGTACCTATTATGATTCTATAAAAAGAAAAGATAATAAAATCACTAAAGATGATTCAAACATAGAACATG	transposase, putative, degenerate	SA1855	COL	1
AGTAGAAATTAGTGATGAAAGTCAGCTTGAAGCTTTATTAACAGCTGAAAAATATTCAGAAATGATTGGT	ORFID:SA0760~glycine cleavage system protein H homologue	SA0760	N315	1
AGTAGATGAATTACTTGATATGGTTGGATTAGAACCTGAAAAATATAAAAACAGAAAACCTGATGAATTG	ORFID:SA0677~hypothetical protein, similar to choline transport ATP-binding	SA0677	N315	1
AGTAGCTTTGACTATTATTAATTTAATTGGTGCAAGCACTTCAAAAATATTACTTGGATTCATGGTGGCA	ORFID:SA1732~hypothetical protein, similar to sodium-dependent transporter	SA1732	N315	1
AGTATAATTTTACTAATTGTTCCAGACTTAATTAGACTTAGCAAAACTTTTCTAATTGAAAGTAGGGAAT	ORFID:SA1369~hypothetical protein, similar to ComYC protein	SA1369	N315	1
AGTATAGATGCTCTAATTGATACAATTAAACAGTACCATGATAAAGAAAAAGTAGATATTTTGTTCTCAG	folylpolyglutamate synthase/dihydrofolate synthase	SA1709	COL	1
AGTATATGCGGTCATTGGTATCGTTATAACAAGTGTTTCTTATATATTGTCTATTAAAATTTTTAACAAA	conserved hypothetical protein	SA0340	N315	1
AGTATGCCATTGATGATAGATTTAACAAATAAGAACGTGGTTATAGTAGGTGGGGGTACAGTTGCAAGTC	conserved hypothetical protein	SAR2697	MRSA252	0	1
AGTATTAAAAAAAGATATCAAAGGGAGTTATTTTGTAAAAGACAAAAATTTTGACGTGTCTAAATTCATA	membrane protein	SA1038	COL	0	1
AGTATTAACTTGTTACACAGTTATGGGTTATTTATCTTCACGTTATTTAACTAAATACTTGAACTATAAG	hypothetical protein	SA0839	N315	1
AGTATTGAAAAGATTTTAGAAGGTCTCCAAACATTACCTGAACGTGCACGAAATCTAACTGAAGATGATT	hypothetical protein	SA2485	N315	1
AGTATTTATTATTGATAGTCAAGCATTGAAACGCAGTATAGATTTGATAAAAAAAGTGGAACCTGATTTT	glycerol uptake operon antiterminator regulatory protein	SA1139	N315	1
AGTCAATTACTACAGATGAATTAAAAAACAAACTTTTTGAATCTAAACCAGTTCAAATTGTTGATGTTCG	conserved hypothetical protein	SA1578	N315	1
AGTCGAAGACAGGGGCCCCAACACAGAAGCTGACGAAAAGTCAGCTTACAATAATGTGCAAGTTGGGGTG	hypothetical protein	SAS0230	MSSA476	0	1
AGTCGCAAGAAGGTGTTACTTTCTTAATTTCGAGTCATATTTTAAGTGAGTTAGTTAAAATCACAAACTC	ORFID:SA2302~hypothetical protein, similar to ABC transporter	SA2302	N315	1
AGTCGGGTGGTCATGCATCGCATACGCCTGAAACAGAAGAATATGGCATATCATCATTTGTATATAAACG	conserved hypothetical protein	SA0410	N315	0	1
AGTGCCGTTTAGATTCTCAGGATTTAGCTTTGATGTGACATCGACGTTAGTGTTCTTTATTTTAGCTATC	xanthine permease	SA0374	N315	1
AGTGCTATGGTGTATATCAATCCCGCAGCATATGCTGAACAAGATCAAAAATGGGAGAAGATTAAAGAAC	putative extracellular glutamine-binding protein	SAR1949	MRSA252	0	1
AGTTAAATACATTTTTCAAAGCATATTTACAACAAAAAGGATTTAATCCTGAATTAATGTCAGCTACTAT	ORFID:SA2490~hypothetical protein, similar to N-hydroxyarylamine O-acetyltr	SA2490	N315	1
AGTTAAATGAAGAAGAAATTAAAAACCATGCTCCTAAAGTAGCAGTAATGAATGAAGACAATGTCATTAT	aspartate 1-decarboxylase	SA2390	N315	1
AGTTACAGATGTTGAAAAATCATATCAAAGCGCACATGTTTTTAAGCGTCGTCGAACACCTATCGTGAAA	oligopeptide transporter putative ATPase domain	SA2251	N315	1
AGTTATCTAAAGATTATCCTGAATACGGTTTTGAAAAAAACGCGGGTTATGGTACCAAACAACATTTACT	RNase HII	SA1087	N315	1
AGTTATGTTAATCCTAATTATGCATTAGTGGCCAGAAAATTTGTTGATAAAGCACATCATCATCAATTAC	ORFID:SA1542~hypothetical protein, similar to glycerophosphoryl diester pho	SA1542	N315	1
AGTTCATATAAATCTAGAGTATTCAATATTATAAGCATCATAATGGTTTCAATGCTTATTTTATCACTAG	cysteine protease precursor	MW0931	MW2	0	1
AGTTTAACTGTTGCTGATGTTAAAGTAACTGGCGACTTCAAAATCGAAAACGATTCAGCTGAATCAGTTG	50S ribosomal protein L25	SA0459	N315	1
ATAAAAAGTAAAGATTCTGTATTAGAACAGGCATCATTACACTTATTGTCTTCTGGTGGTAAAAGAGTAC	polyprenyl synthetase	SA1510	COL	1
ATAAAAATGACATAGTAGCAGATGTAGTAACAGATTATCCGAAAGCAGCAGATATTTTTAGAAGCGTAGG	cell division and morphogenesis-related protein	MW0235	MW2	1
ATAAAACAATATCAACCAAGATATAATATATTATTAAAGGATGATAAAAGTTATCCATTTATTAAAATTA	excinuclease ABC subunit C	SA0993	N315	1
ATAAAACAGTCATAGCTGATGACAGTGGACTAGAAGTTTTTGCATTAAATGGTGAGCCAGGTATATACTC	conserved hypothetical protein	MW1034	MW2	1
ATAAAACTTTCTACATCAGGACATATTTTAACGAACGAATTTCAACAAACTGAAGATAAACATATTTATG	dihydrolipoamide dehydrogenase	SA1349	N315	1
ATAAAAGTTGATTTCGAAGTAACAAATAATAAAACTGAAACTGATGTCATTAATAAACCAAGATTTAGTA	hypothetical protein	SA2061	N315	1
ATAAAATGTTTAGCTATCATTTTAAAAAATATTTACAAATGTCGCCAAGTGATTATTGTAAGCAAGCTAA	ORFID:SA0215~hypothetical protein, similar to two-component response regula	SA0215	N315	1
ATAAAATTAAGTGCATACTTAATCGAATTATCAGTTTTCTTTTAATTGTTCACAGCACGTTCCTTTTTAT	hypothetical protein	SAS082	N315	0	1
ATAAACAAGAAATACAAGAAATTAATCGAACATATAGAGATAAAGATAAAGTTACAGATGTAATCTCATT	conserved hypothetical protein TIGR00043	SA1627	COL	1
ATAAACGGATTAATTCCATTTAAAACTAAAGGTAACATAACCGGGGAACTATATATAAATAATCAAGATG	ORFID:SA2476~hypothetical protein, similar to cation ABC transporter	SA2476	N315	1
ATAAAGAAATATCTGACAAACATATAAAACTATCTATTGTTACCATTAATATCTCATTTCTATTTATCAG	sodium transport family protein	SA2011	COL	1
ATAAAGATAAATAATTTAGATGAAATGAATCAATTTGCTATGTTTTTAGTTGAGCAATTGAAAAGTGGTG	conserved hypothetical protein	SA1857	N315	0	1
ATAAAGATAAGATTGAAGGGTCTTTAGAAGAAGTCGTAAAAGACGCAGATGTATTTATCGGAGTTTCTGT	ORFID:SA1524~malate dehydrogenase homolog	SA1524	N315	1
ATAAAGATAATGATGCGTGAAGTAAGATTAGCGTTATTTGAGGCTGACGTAAACTTTAAAGTGGTAAAAG	ORFID:SA1080~signal recognition particle homolog	SA1080	N315	1
ATAAAGATACCGAACAGTTATATGGTGAATTGATCACTGCTAATATATATCGAATTAAGCAAGGCGATAA	ORFID:SA1051~hypothetical protein, similar to fibrinogen binding protein	SA1051	N315	0	1
ATAAAGCTAAGTTCAATTGACCAATTTGAACAGGTTATTGAGGAAAATAAATATGTTTTTGTATTAAAAC	conserved hypothetical protein	SA0804	COL	1
ATAAAGGAATTACGTCGGTTAGGTGCAAATGTCTATGTGAGTATTGAAAATGGTATAAAATCATTAAGTA	ORFID:SA1217~hypothetical protein, similar to negative regulator PhoU	SA1217	N315	1
ATAAAGTAGTAATGCATTTTGCAGATAAATTATGTAATAAACAAGCACTATATCGTACGCTAAGTATATC	ORFID:SA1196~hypothetical protein, similar to DNA-damage repair protein	SA1196	N315	1
ATAAATATGTTGATACCGTTTCAACAAAATCTTCATTACGACGTATTATTAGCGAAGCCATAGAGCTATC	hypothetical protein	SA1161	N315	1
ATAAATCAGTAATGGATACTCAGCTAGAAGAAAGCATGTTGTATTCATTAAATGCTGGAGGTAAACGCAT	ORFID:SA1352~geranyltranstransferase homolog	SA1352	N315	1
ATAAATCATTAATTGATAAAGTGAAAAATGATTACTTTTCAAGAGAAGCTGATGATTTGAAAGCTGATAT	ORFID:SA0828~hypothetical protein, similar to ATP-dependent nuclease subuni	SA0828	N315	1
ATAAATGATGCCTATAATGCAAGTCCTACAAGTATGAGAGCAGCTATTGATACACTGGGTACTTTGACAG	UDP-N-acetylmuramoylalanyl-D-glutamyl-2, 6-diaminopimelate-D-alanyl-D-alany	SA1886	N315	1
ATAAATTACGTTTTTACCAAAGCGCATTTTATCAAGAATTATTTGATTTTTATTATGACTTATTTAAAAG	transcriptional regulator, TetR family	SA2593	COL	1
ATAAATTTTGGGAAAATATCATTTCTGTCCCACTCCCATATTCCCGATAGAAAAACAGGACTTGAACTTG	conserved hypothetical protein	SA0079	N315	0	1
ATAACAATGAGTAAATCAAGTGATGCCTTATTTAATTCATTAACACAATCGTTTGAGCTAATAGAAGGTG	ORFID:SAS072~hypothetical protein, similar to transposase for IS232	SAS072	N315	0	1
ATAACCATTTAAAATTAAACTTACTTTATCAAGATTTAGAAATTAAACGTATTGAATTTTTTAGTAAATA	conserved hypothetical protein	SA1991	COL	1
ATAACCCAGATAATCCTGATAACCCTAACAATCCTGATAACCCTAACAACCCTAACAACCCTGATAATCC	serine protease; V8 protease; glutamyl endopeptidase	MW0932	MW2	0	1
ATAACCGTTAAAGGAGAAATATTCAATACTGATGAAAGTCTAAAATCACATATTCCGAAAGATAACTTTG	acetyl-CoA c-acetyltransferase	SA0534	N315	1
ATAACGTTAATGATAAACAAGATAAGCATCAACGCGTTGTATTATACGCACATGGAGGCGCATGGTTCCA	conserved hypothetical protein	SA2323	N315	0	1
ATAACGTTTATATGTTATCGACCGTTTTGTATCCAAACTGGGGGCAATATAAACGCGCTGATTTAATCGG	phospholipase C	SA2003	COL	0	1
ATAATAAATTAAACTTTAATATCCAACAAATGAATGGTGAAATACTATCAGTTTCACAATTTACTCTCTA	conserved hypothetical protein TIGR00256	SA1688	COL	1
ATAATAACAAAATAAAGAAACTAATGATTAAAGGACTTATCATTATTAACATTTCATTTATCGTTATGAT	conserved hypothetical protein	SA0769	COL	1
ATAATAATGCTTACTGCTAAAGATTCAGAAATTGATAAAGTGCTTGGTTTAGAACTAGGTGCAGATGACT	DNA-binding response regulator YycF	SA0019	COL	1
ATAATAATTGATAAAAACGCAACAACAGTTACTATGAATTTTTTAATTTACATCACCTACTATAAATATT	hypothetical protein	SA1372	COL	0	1
ATAATAATTTACGTATCGTCACTGAAGAAGATTTAAAAAAGAATAAAAATGCATTATCTGATAAAGAATA	conserved hypothetical protein	SA1802	COL	1
ATAATCGCGATAAATATGAATCTTATATCAATAAGCAAGATAACATTGTAAATAAAGATGACGTATTTAT	hydrolase, haloacid dehalogenase-like family	SA1774	COL	1
ATAATGAAGTTAAAGGTGTACGTACAAATATTGGTACAGAGTATTTATCTAAAGCAGTAATTATTACAAC	glucose inhibited division protein A	SA2737	COL	1
ATAATGATTTTAGTAGCACAACCATTAATTAAACCGGTTCTCTATCTGTTAAAAGGAAACTTAAAGAAGC	ORFID:SA1580~multidrug resistance protein homolog	SA1580	N315	1
ATAATTTCCACTGGTATGTGAAAGGACCTAACTTCTTCTCATTACACGTTAAATTTGAAGAATTATATAA	general stress protein 20U	SA1941	N315	1
ATAATTTCTTTAAACGTTTTAGCTTCTATGCAATTGCAATTCAATACTTTGTTGTACAATTTATCATTAC	ORFID:SA2300~hypothetical protein, similar to glucarate transporter	SA2300	N315	1
ATAATTTTAGTTATAGCAATTATTGCTTATATGATTGTTCAACAAATTCTTAACAAGCGAGCTGTTAAAG	rhodanese-like domain protein	SA1592	COL	1
ATACAAGTCGTCAGTTGTCAGACAACAAAGATGATGATAAAGTCATCCATCTTAATAATTTCAAAAATTT	hypothetical protein	SA2343	N315	1
ATACAAGTTTTGGGATTGTTGGGATGTTTGTTAATACTTGTATAGTAGCTAAATATGTGATTATTAATTG	repressor of toxins	SA1812	COL	0	1
ATACAATTCCAAAAATATTCAACAACTATTAGATAAACGATATATAAATGCACAAATTAGAAAACAAGGT	conserved hypothetical protein	SA0636	N315	1
ATACACGAAAAACTATATGACTTAATTATGTGTCATTTACAACGTTATAAAAATGAAAATGATCAAATTA	ORFID:SA2379~hypothetical protein, similar to transcriptional regulator tet	SA2379	N315	1
ATACAGCTGGAATAAGATTAACTCCAAAAGAAATCGTATCTAAATTAAATGAATATATCGTTGGACAAAA	heat shock protein HslU	SA1097	N315	1
ATACATATATTAACATCTTTATATGCTTCAACATCAAATACACCACATATTGGTGAACAACAAATGAATC	conserved hypothetical protein	SA0628	COL	1
ATACATCCTCATATTAAAATAGGATCACGTAATTTAGTAGGACATACGCATAGATTTAGAGAGGCGGCTG	ORFID:SA1935~similar to amidase (HmrA)	SA1935	N315	1
ATACATGTACGTAATTATAATAATGTTAAACATAAAGATGTATTAATCGTTGGGAATACATTCAATAATT	conserved hypothetical protein	SA1980	COL	1
ATACCAAGATATATCTTTTTCAACTATAGAAGAATTTATTAATTGGGATTTAGAAAAGTTAAAATCACAT	conserved hypothetical protein	SA1274	N315	0	1
ATACCCGTGACGCTTTACGTCAATTAGAACAGAATTATCATGACACATCATCAAAAGATAATTTTTCATA	NADH:flavin oxidoreductase / NADH oxidase family protein	SAR0319	MRSA252	0	1
ATACCTAAATCAATTCTTTGGATTTAAGAGATATCTGTATCAGGATAACGAACGAGTGGCACATATTCAT	hypothetical phage protein	SAR2076	MRSA252	0	1
ATACGACAAAAGAATTATTTGAAAAATGGTTTCATCCAAAAGGGGCTAGCACAAAAGTATTTCGCTTTAA	conserved hypothetical protein	SA2193	N315	0	1
ATACGATAAGACCGATCATATCGTTGGTAGTGGCATTACTGCTGCACATCTTGCACTTAAATTGTTAAAT	hypothetical protein	SA0806	N315	1
ATACGTTATGTCATAGCTATTTTAGTAGTTGTATTAATGGTGTTGGGTGTTTTCCAATTAGGAATAATCG	ORFID:SA1119~sporulation-related protein SpoIIIE homolog	SA1119	N315	0	1
ATACTAAAGTGTTATCGACAATGATTTATGATATAGCTTTAGAATTAATTAGTACTATTCCTTTCGTACC	conserved hypothetical protein	SA0721	N315	1
ATACTGCAACTGGTGCTACTAAATCGGCAACTGTTGAAACTGGTTATACATTAAATGTACCTTTATTTGT	translation elongation factor EF-P	MW1481	MW2	1
ATAGAGAATTTCGAAAAGAAATTCTACAGGCAATGCGAGTTGGGGTGTGGGCCCCAACAAAGAGAAATTG	hypothetical protein	SA1097	COL	0	1
ATAGAGATGCTATTAGTGTTATTAATCATCAGTTTATTATTAATTTTAATCATTCCAAATATTGCTAAAC	comG operon protein 3 precursor	SA1599	COL	1
ATAGATCATGTTAGTATCAAACATAAAAATGTTAATTCAATACAATACCGTGTAGCAAATGAAAAAGTGA	conserved hypothetical protein	SA1011	COL	1
ATAGCATTGAATTATGTATACTATGACATTTATACACAAATGATTGAAATGACAAGAGACTTAGAATTAT	hypothetical protein	SA1928	N315	1
ATAGCGACTCAGATTCGGACAGCGATTCAGACTCAGACAGCGACTCAGACTCAGACAGTGATTCAGATTC	Ser-Asp rich fibrinogen-binding bone sialoprotein-binding protein	MW0516	MW2	0	1
ATAGCTAATCTTGAAAATACATTAAACAATAATGCATTTATCCAGCAATTATTAGCTGGAAATGGCTATA	conserved hypothetical protein	SA0954	N315	1
ATAGGTAATAAAATTAAAAATCTTAGAAGAATTAAAAATTTAACGCAAGAAGAACTTGCTGAACGTACAG	transcriptional regulator, Cro/CI family	SA1107	COL	1
ATAGGTCTAGTCTACGACGCATTAAACACAGAGAAGTTAGACGTTGCATTAGGTTATTCTACAGATGGTC	glycine betaine/carnitine/choline ABC transporter opuCC	SA2235	N315	1
ATAGGTGAGCTAGCGACAAAAGATTTTATTATTGGTATTGCCTTGGCCATAGTGATATTAATTGTCTTTG	conserved hypothetical protein	SA0333	N315	0	1
ATAGTACTTAGAGTCTTTATAGGATATCTTCACTTCTTTTTAAAAAAGGAAAATCAAGATAAATTTCTTC	conserved hypothetical protein	SA1016	N315	0	1
ATAGTAGCATTATCAACAGATGAATTTAATCAAATTAAACATAAAAAATCTTATTATGATTATGAACAAC	glycerol-3-phosphate cytidylyltransferase	SA0698	COL	1
ATAGTTATGATATGAAAGAACTTGCTGCTATTTTATCTGAGGCATCAGGCACAGAAATTAAATATGAACC	conserved hypothetical protein	SA0381	N315	0	1
ATAGTTTTAAAATCTAATGACAAAGTAATAAACAATGCTTGCCAAATAACAATAAATTATAAAAATAACC	hypothetical protein	SA1547	COL	0	1
ATAGTTTTTCAGAAATGATTGAAACGTATCAGCTTAATTTAATTAGTTTTAATGTTTTATATACTGTGTT	oxidoreductase, short-chain dehydrogenase/reductase family	SA1545	COL	1
ATATAAAGTTAATGAATACAAATGAAATATTTGATTATATCGCTAATCATAACTGTGCTTTTGATATTCA	conserved hypothetical protein	SA1502	COL	1
ATATAAATACAAAATTTTATCGTGTATGTTGTTATACGATGAAAATACTTTTAATCTAATAAAATCATTT	hypothetical protein	SA1487	COL	0	1
ATATAAATATCGTATTTTTGCAACGATTATTGTTGGGATAATTAAGTTTGGTATACCAATGCTTATACCA	ABC transporter (ATP-binding protein) homolog~ORFID:SA1683	SA1683	N315	1
ATATAAGTTCACCTGCCCAAAAGCTTAGAAGAGGATTAAATCAAGTAGGCTTAGGTGTGAAAACAGGGAT	penicillin-binding protein 3	SA1381	N315	1
ATATAATCCAGTTTACTTTATTGTTGAATCATACCGTGCAGCAATTTTATATCACGAATGGTATTTCATG	teichoic acid translocation permease protein	SA0594	N315	1
ATATAATGTGAAAGAGGACTTTGATGGCGTATTAAATGAATTTGATAAAATTATTGGAGTCGACAGAATC	ORFID:SA1386~hypothetical protein, similar to endonuclease IV	SA1386	N315	1
ATATACACCTGAAATCGGCCGTGGTAGAGGACCAGTGAATCATTTTGCATATTTAAAGAAAGAGGGATTA	phosphomethylpyrimidine kinase	SA1896	N315	1
ATATACCATCTATACATTCAGATTTAGATGATATTTTAGTAAATATGTTCTTATATTTACCTAATTTTTT	conserved hypothetical protein	SA1444	COL	1
ATATAGAGTTATTAACATCTAAATTGCATCAATCGAAGCAGCCTATCATCATTACTGGACATGAAATCAA	hypothetical protein, similar to indole-3-pyruvate decarboxylas	MW0162	MW2	1
ATATAGATAAAAATACTACATTTGTCATGACAATTGATGATGAAATTATATCTACGATTACGGTTAGATA	acetyltransferase, GNAT family	SA2400	COL	1
ATATAGATAAGTATAATCAAGATTTAACACAAATTAGGGGGTCTCTTTGACTTAGAGAACAAAGAAACTA	peptide chain release factor 2, programmed frameshift	SA0818	COL	0	1
ATATAGATGAATTAGTTAAAACTTTAACAAGTATTACTGGTGATAATAAATTATTTAGCATTATCATGAT	Na1/H1 antiporter family protein	SA0946	COL	1
ATATAGATGATACTGTAAAATCATTCATCAATTTAAGCCAAACAGTTGGTGAATTAGCTATTCAATTAAT	D-3-phosphoglycerate dehydrogenase	SA1773	COL	1
ATATAGGAGAATCAACATTGATAAAGATAAATAATTTAGATGAAATGAATCAATTTGCTATATTTTTAGT	conserved hypothetical protein	SAS1957	MSSA476	0	1
ATATAGTTTTTCAATATTTCTACTATCATCATTTACTATGACTTTTATAAACGTTATTCAATTTACAGTC	intercellular adhesion protein A	SA2689	COL	0	1
ATATATAAATTTTTAAAGACACAAGATAAAGTTTATGCAAGAACGTTAGATCATCCAGTTATAGAATCAT	tetrapyrrole methylase family protein	SA0549	COL	1
ATATATATCCAGGTGAATTAGGTATTGATGTCAAAGTAGGTCCATTAGCTGATGTGTTAGAAGGAGCGAA	pantoate beta-alanine ligase	SA2391	N315	1
ATATATGGATTATTTAAGTTTGAAAGATCCTAAACGTATATTAAAATCATACCCTTACATGTTATCAGGA	peptide ABC transporter, ATP-binding protein	SA2473	COL	1
ATATATTAAAGAACTAAACGAAGAGCGTGATATTTTAAATAAAGATTTAAATAAAGCGTTAAAGGATATT	femA protein	SA1410	COL	1
ATATATTATTAACACGAAACACATTAAAGAAGTGCAACAATGGTTTAACTACACTTATATGGTAATATTG	two-component response regulator	SA0251	N315	1
ATATATTCAACGAAATATAATTCATGACGATCATACTTTTATTGCTTGGTTAAAAATGTTTTTACAAGAG	urease accessory protein UreF	SA2284	COL	1
ATATATTTCAAGTGCGCATGAAGTAGAAAGTATGATGTTTTATACATGTATTTTAGATATGATTAAGTAC	conserved hypothetical protein	SA0710	COL	1
ATATCAAAAATAATATGCAACGTTATATTAGTATCAATCATTCTATCGGAGGCGTTCCAGAGATGTATTT	ORFID:SA2165~hypothetical protein, similar to transcriptional regulator tet	SA2165	N315	1
ATATCATACCGAAATGTTTGCCACTTCGAAAAACAGCGGTTCTTGTTACAGGAATCTTTGAGATATTATT	conserved hypothetical protein	SA1937	N315	1
ATATCATCAAAAAAAGGGGTGGATTCAATAAAATTAATGCTGTCAAGAATACACGTATTGAAGTTGTAAA	ORFID:SA0566~hypothetical protein, similar to iron-binding protein	SA0566	N315	1
ATATCATCTATTTTCAAGGTATGTTTTATACACAAATATTCGGAATACCAGTCTTTTTATTTTTAAATCT	two-component sensor histidine kinase	SA1701	N315	1
ATATCATTTCAACAATCAGTGACTTAGTAAAATGGATTATCGACACAGTGAACAAATTCACTAAAAAATA	delta-hemolysin	MW1959	MW2	0	1
ATATCGCCCCTATTTAAAATTAGCAGAGCCGATTTTGGAAAAACACAATATATATTATGGTCAATGGTTA	ORFID:SA2060~hypothetical protein, similar to transcription regulator MarR	SA2060	N315	1
ATATCTATACTGTCACATTGATGACACTTTATTTAATTTTGTCACATTTATTTTGACAAAGTTGATTTTT	hypothetical protein	SAS073	N315	0	1
ATATCTTAATGTACTTTAATATTTTACCGAAAATTATTGGAGGTATTGGTTGGTTACTAGCTAAAGTAAC	nucleoside permease NupC, putative	SA0701	COL	1
ATATGAAAAAGGTCCAGAGGTACCAAGAGGATTGCCAGTTATACCAGAAGCATATACACCTAAGTTAAAG	conserved hypothetical protein	SA1022	N315	1
ATATGAACAAACCATTTGTAGCTATTTGTAACTCTTATATTGATATTGTTCCTGGACATGTTCACTTGAG	dihydroxy-acid dehydratase	SA2042	COL	1
ATATGAAGGACGTACAAAACAAGAAACAGGGCACCCACCTGTATATAACAGGCCGAATGATCAAGCTATT	hypothetical protein	SAS050	N315	0	1
ATATGAGACAAGAAATTCAAGATGCAGTGATGAAAGTATATGATGAAACAGATGAAGTAGTACCAGATAA	spoVG protein	SA0541	COL	1
ATATGAGTATCCAATTGATTTAGACTGGAGTAATGAAGAGATGATTTCAGTGATAAATTTCTTTAATCAT	conserved hypothetical protein	SA1106	COL	1
ATATGATATTTATCATTATCATTGGTTTAACGCTTGTCATATTTTGTTTACTTCCTACAATTCACAAAAT	hypothetical protein	SA0105	N315	1
ATATGATTGCGATTTTAAGTAACATGTCTGCCTTATTAAATGATAATCTAAATCAAATTAATTGGGTTGG	conserved hypothetical protein	SA1540	N315	1
ATATGCCAATGATTTTAGAAAACTAGGAAATTATAAAGGTGATATTTTAGATGCTCAGAAAAAATTAAAC	phage infection protein, putative	SA2665	COL	1
ATATGTTATATCAAATGATTGATCTTATTAATGATACATTAGTGTCGATTCGTTTTAGTGTGAATCAAAA	DNA polymerase III, gamma and tau subunits	SA0520	COL	1
ATATGTTGAAGCATTCAAACCATATTTATTAACACTATTGTATTTGGCAATATTTATTACTTTATATTTA	conserved hypothetical protein	SA0934	COL	1
ATATTAATAAAGATCAAAACATAGTTGATGACTATAAAAACAAAATTTTAGATGCAATGGAAGCTAATGC	conserved hypothetical protein	SA0524	N315	1
ATATTAATGCTTATCACCTTTTTTAAAAAGAAAATCGAGGCAAATTACAAATATTCAATTAGAGTATTGG	hypothetical protein	SA1275	COL	0	1
ATATTAATTAAACAAGCAAACAGATTATCAACATTATTTGATGATATGACTCATATTATCACTTTAAATA	sensor histidine kinase SaeS	SA0765	COL	1
ATATTACTTTGTTTTACCTTTTATAATATCAACTACTATTTATTCCAATTAAGCGACCTTGATGCCGTAC	ORFID:SA0126~hypothetical protein, similar to capsular polysaccharide synth	SA0126	N315	1
ATATTAGTGATAAATATCCCTCTGAATTGTCTGGTGGACAAAGGCAACGAACATCAGCTGCCAGAGCATT	ABC transporter, ATP-binding protein	SA0718	COL	0	1
ATATTAGTTAAAAAATACGCTTACTTAGCAATTGGACAAGGTGCTGTTTTTGGTATTGCTATTTGGGTAT	conserved hypothetical protein	SA0175	N315	1
ATATTATACACCTAATGATATACAAGTAGATATAGATGACTGGGTAGTTGTCGAATCTAAAAGAGGCATA	hypothetical protein, similar to signal peptidase II homologue	MW0440	MW2	0	1
ATATTATTTTCAAGATACGCATCAATTACATTAGGTGAAGAAGGTGAAGACCCAGAATTTTCATTGCCAT	glycine betaine transporter 2	SAR2276	MRSA252	0	1
ATATTCACAGATGGTATAATAATAGAGTCGCCTATCTCTCAGGCGTCAATTGACGAAGAGAGGAGGTGCA	hypothetical protein	SAP007	N315	0	1
ATATTCATCCGAAAAATGAATATTTACGACGTGCTAAAGTGCAAGAACAATTTGTGGAAGATTTTAATCG	conserved hypothetical protein	SA2377	N315	1
ATATTCCAAAAATCACGACATTTTTAATGTTTAATAACAAAGCTGAAGAAGCTGTTAAACTATACACAAG	conserved hypothetical protein	SA1050	N315	1
ATATTGAAAAAGCAGTACTTGTTGGATTTTCAAATGGATCAAATATAGCGATTAACTTAATGTTGCGTTC	phospholipase/carboxylesterase family protein	SA2529	COL	1
ATATTGAAGCTAAAAAAGTCTTAATCGACAAATTGTTAGCACACACTAATGAGCTTGTCATTCAACCATC	5-methyltetrahydropteroyltriglutamate-homocystei ne methyltransferase	SA0344	N315	1
ATATTGACAACAGCCATTGTATCAGGTTTGGTATCAGCATTAGTAGGTATTCATGGAACGAAAGAATCAG	ORFID:SA2357~hypothetical protein, similar to regulatory protein (pfoS/R)	SA2357	N315	1
ATATTGGTTTTAAGAATTTCATATATCATGATTACTGGACATTCTAATGGTCAAGATTTAGTCATGAAGG	penicillin-binding protein 1	SA1194	COL	1
ATATTGTAACTAATAAGCTGAATTTTTATATTTCATTAGGTGGACCTGTGACATTTAAAAATGCTAAACA	deoxyribonuclease, TatD family	SA0534	COL	1
ATATTTAAATTTATCCTTTTTGTTGTTGAAATTTATTATTTCGGCATGATTATATATTTCTTTACATCTT	conserved hypothetical protein	SA1033	N315	1
ATATTTAAGATTTTAGAATACATTTATCGTTTAATCTTAAAATATTTACTTTGGTATATTAAAACTGTCA	conserved hypothetical protein	SA1990	COL	1
ATATTTAATATAGCAGATTCAAGTTTAACAATTGGTGTAATATTAATTATTATTGCCTTATTAAAGGATA	lipoprotein signal peptidase	SA1039	N315	1
ATATTTATGAAATTGTTGTAGCAGAACATTCTACACAATTAATAGAGCTATCATCTGATGAATTGAAATT	conserved hypothetical protein	SA1389	N315	1
ATATTTCTATAGTGGCATTATTACTTGCCATCATTGTTGCAGTACCTATAGGCATTTTATTATCAAAAAC	amino acid ABC transporter, permease protein	SA2452	COL	1
ATATTTCTTTTCCCATAATCATTCATTACCATCATCATTTAAGAACTTAGAAGATAAACTTGATGATATG	competence protein comGA, putative	SA1601	COL	1
ATATTTGCTAATATATTAGCATTGATTGCATTAAAAGAATTGTTGAATATGAATATGATTAAATTTGTTT	phosphatidate cytidylyltransferase	SA1280	COL	1
ATATTTGTTTGAATCTAATGTCGATTACTTTGTATATAATGGTGATATTGTTTTAATTGACCGTATTACA	secA family protein	SA2671	COL	1
ATATTTTAATCACATTAATTATTCTTTTATTAAGTATTATGGTGTTATTTATTAGTGGTTTAGCTCAAGG	conserved hypothetical protein	MW2281	MW2	1
ATATTTTACCTTCTATTATAGGAGGTTTCTTTATGGCTTTAACTTATTCACTAGACGATTTCACAGTAAG	ORFID:SA0952~spermidine/putrescine ABC transporter homolog	SA0952	N315	1
ATATTTTAGAGAAAAATAATTTTTCATTAGATAAACAAAAGTTTAAAGGTGCATATACAATTGAACGAAT	peptidyl-tRNA hydrolase	SA0546	COL	1
ATATTTTAGGCGATATTTCTGTAGACCAAATTTCAGACAGTACATTATATTATACTTGTGAAAAATTCAA	hypothetical protein	MW1455	MW2	1
ATATTTTTGGGATGTGGTGTTTAGTCAATGGCGGGCTGAAATTGTCGTTTTATGGTGGGCTGAAAATGCT	hypothetical protein	SA2200	COL	0	1
ATCAAAAAAGGTGACAACGTTAAAGTTATCGCAGGTAAAGACAAAGGTAAAGAAGGTAAAGTAATTGCTA	ribosomal protein L24	SA2228	COL	1
ATCAAAACATATTGGTGGTTTCCCAGTAAGTGGATTATTCCTGCGCTGTACAAATCAAGAAGTGATTGAT	ORFID:SA2155~hypothetical protein, similar to malate:quinone oxidoreductase	SA2155	N315	1
ATCAAAACCGTATTCCAAAGCGAATGCCTATTTAGAGTCAGTAGGAAAATCACCAATTAATTGGTGTGAA	uracil-DNA glycosylase	SA0627	COL	1
ATCAAACAACTGTATGGTAAAATCAAAGGTAAGACATATAAAAAATCTTACAACATGAATAATAGAGTTT	conserved hypothetical protein	SA0807	COL	1
ATCAAACCGTTTGTGACAACTAAATTAATTTCACCACTTGGTAAATTAAGAGCAGGATTAGATTTAATCA	protoporphyrinogen oxidase	MW1772	MW2	0	1
ATCAAAGATATATTTTATGATGGTACTTTTAAGAGAGAAGATGATTCTGTAGAAACTTTACGTTCGACTA	conserved hypothetical protein	SA1705	N315	1
ATCAAATTAAGAACAATACGATAAATAAAGCATACGAACATAAAGACCCTACAAACAATGGCGAACAAAG	hypothetical protein	SA1175	N315	1
ATCAAATTTATTAAAGAATCTATTCAGACACTTAAACCTGTTAATGACAAAAAAGTGATTCCGATACCAA	5-methyltetrahydrofolate--homocysteine methyltransferase, putative	SA0429	COL	1
ATCAACGAATCATTAAACACTTGCAACAGTATAATAAAGAGGTGGTTATATCACATCATAATTTCGAAAG	ORFID:SA0756~hypothetical protein, similar to 3-dehydroquinate dehydratase	SA0756	N315	1
ATCAACTAGGGGTATTACCTGAGCAAATTATGTATGTTGGCGATGATGCGTTAAATGATGTAGCTCCAGC	hydrolase, haloacid dehalogenase-like family	SA0667	COL	1
ATCAATATGTATATTTAGATAAAGTTCCAAATCATGCCATTATTAATGAAGCAGTTGAAATAGCAAAAGA	ORFID:SA1060~hypothetical protein, similar to RNA-binding Sun protein	SA1060	N315	1
ATCAATATTCTTGGTGCATTCCATCAGCAATATCCAAATGTTACATATAATTTAATAGAAAATGGCGGCA	ORFID:SA2330~hypothetical protein, similar to transcription regulator	SA2330	N315	1
ATCAATGAAATTGATAAATGGCGACATACTAATCAGTATGCTATTGCTTCAAAAATGATAGAAAACTTAG	transcriptional antiterminator, BglG family	SA0403	COL	1
ATCAATGAATTAGCATGGCATAATTTATTTGCTAAAAATATGTTTATTAGACCTGAATCAAAAGAAGAAG	phosphoenolpyruvate carboxykinase (ATP)	SA1838	COL	1
ATCAATGATATTTCAGATAAACACATTACTATTAGTCAAATGGAAGAAGCTTTCGAGAAAGGTTTTAAGA	conserved hypothetical protein	MW1485	MW2	1
ATCACCTAAAATTAAAAATATTACATTGAAGTTTAATGGTGATCCGAATAATGCATTGTCAGAACTTAGA	RGD-containing lipoprotein	SA0201	N315	1
ATCACGCCTTATTTCCATAATGAACTGACAAACGCGAAGTATATTTCATATTCACTAGGTATACTCGTTA	hypothetical protein	SA0425	COL	0	1
ATCACGTGAAGTGAAGTTCAAACAATTTATTTTTGATCAGTTTATGGTACAGGTATGTTTCTTAGGAGAG	conserved hypothetical protein	SA0174	N315	1
ATCACTGATATCTTAAGTAAATCATTAGGATCAAACACACCAATCAACATGGTTCGTGCTACAATCGATG	ribosomal protein S5	SA2222	COL	1
ATCAGTAAGTGATACCAATTTATTAGGACAATACGAAAAGGCAATTTCTATTAGCGATATGATAGAGATT	hypothetical protein	SA2406	COL	0	1
ATCATATATTCTTTGAAACACTTGTAAGAAAATATAATGAGTATTTACTACATAATGATATTTCAAATTA	phosphosugar-binding transcriptional regulator	SA2317	COL	1
ATCATCATTTTACTAGTATTAATAGTGGCATATATTATTGGAACGATTATAACAATGATAAGATTTTATG	conserved hypothetical protein	SA2063	COL	1
ATCATGTTGGATGCTTTTAAAGCGCATAATATTATTAATGATATTAACGATATCGATGGAACAGGTCACC	ORFID:SA1533~acetate kinase homolog	SA1533	N315	0	1
ATCATTACATTTTTAATCGTCTTAATTAACTTAATCGTTACATTTCCGGTTTTACGAAAATTTAAAATCG	conserved hypothetical protein	SA0012	N315	1
ATCATTTCCTGTTTTATTAGCTGGTATGAGAAGTTCTAGTGCTGACGAGACGAATGCCATTCGCAAGCTA	putative acetolactate synthase	SAR2297	MRSA252	0	1
ATCCACCTTTAAACCAATTAACGTCACAAATTAAATCAAAGTATTTAATTGCAACAACTGCAGCGAAAAG	DNA-directed RNA polymerase, omega subunit	SA1222	COL	1
ATCCACTTGAATCTATAAAAGAAGAAATTAAACATCAACGAGGTAAATTTGATGTAATAATCGTGCTAAG	conserved hypothetical protein	SA0784	N315	1
ATCCACTTTGTCGAGAACAAACGTTATTTAGAAGACATTGATTTAAAAGAATTGGTATTGCCGTTAATTG	conserved hypothetical protein	SA0343	N315	1
ATCCTATAATTTGAAATGTCTACTATTAAAATTGACTTATCGATATCTTGATAATCAACCTCTCAATGAC	ORFID:SA0622~hypothetical protein, similar to AraC/XylS family transcriptio	SA0622	N315	1
ATCCTTTGGATATAAACAGGGTCATCTTGAACCGATATTTATTTTAGGTAAAAATAATAAACAAAAAAGA	conserved hypothetical protein	SA1793	COL	1
ATCGATCGAATAAAAGTGTTATATAGTAAGCAGCCAAAATTGGTTGAGCGGATTTTAACTAAAAATGAAC	holo-ACP synthase	SA1875	N315	1
ATCGCAGTTGATTTAGTAGAACGCTTCATGACTAAATTACGTAGTCATAAAACATATCGTGATTCAGAAC	formate acetyltransferase	SA0218	N315	1
ATCGCTTTAGCTGAAAAATTTATGATTGGTATTTTTGTCATTGCTCTAACATTATGGATTGTCGGAAGTT	2-oxoglutarate/malate translocator homolog~ORFID:SA2486	SA2486	N315	0	1
ATCGGAAATTTCCAAAGAGTATTTTGGAAAAACTGTAGATATTTATGGTGTCTATTATAAAGCGCATTGT	enterotoxin	SAR1921	MRSA252	0	0
ATCGGTAAAATTTACGATAAAGAAGATAAAGCTAAAGAATTAAATAAAGATTTAGATAACAAAATTGCTT	ORFID:SA0691~lipoprotein, similar to ferrichrome ABC transporter	SA0691	N315	1
ATCGTCATTTATGTCATACGTATTATATGCATTTGAAGTAAATATACGAGCTTCAGCTGTGCTTGGATTA	ORFID:SA0136~hypothetical protein, similar to phosphonates transport permea	SA0136	N315	1
ATCGTGGTGATACAGTTCCTATTGTTGAAGCACTAACATCACATTTTGAATTTACTAAATTAACATTGCC	sulfite reductase flavoprotein	SA2413	N315	1
ATCGTTCTAATGTATGATCTAATGCAACACCATCAGTATCATCATTATTCCAATTATAAACGAGTCATAG	hypothetical protein	SA1162	N315	1
ATCTAAATGGTTGTATCATCGTAAGGGTTCGTGGGTTAAAGTATTGGAAAGTTTATTGATATTACCTATT	probable molybdenum transport permease	MW2196	MW2	1
ATCTACGAAGACAATTCCAACATTAATTGAAGTACAAGCTACTGAAAATTTAACTCATGGTTATTTTATT	conserved hypothetical protein	SA0157	COL	1
ATCTAGTTATCGAAAAATTAATGTCATGTATTACAGATAGCATTATTTGTGTTTCAGATTTCGATAAACA	ORFID:SA0125~hypothetical protein, similar to Eps(Exopolysaccharide)G	SA0125	N315	1
ATCTATTAATAACATTAGCTTTATCTACGTTAGGTATTTTAGTAACGGCGTTAGCAGGTGTGATCGTTAC	ORFID:SA1478~hypothetical protein, similar to transporter PAB2175 from	SA1478	N315	1
ATCTGGTATGCATTTTAGAGTAGGTCCGTTAGAAACGACAGTACAAGGAAATATGAATGAATGTTTAATT	conserved hypothetical protein	MW1174	MW2	1
ATCTGGTATTGAATTTAAAAAAATTCCATTTTCACCAGAATATGTTGCTAAATATCTGACTAAAGGTTAA	comE operon protein 2	SA1645	COL	1
ATCTGTACGATACCGATATTATGTCTGGTATTAACGTAGGTATGGATACGATTCATGTACAAACAGGTGT	hypothetical protein, similar to N-acetyl-glucosamine catabolism homologue	MW0811	MW2	1
ATCTTTGAATTTCAATCAATTTAATCTTGTAGATGCACAATGTAAACCTGATCCGAATTTTAGTTCAGTT	ORFID:SA2279~hypothetical protein, similar to phosphomannomutase	SA2279	N315	1
ATCTTTTAGTCAAAATAGAAGTCATAGCTTAGAACAATCTTTAAAAGAAGGATATTCACAAATGGCTGAT	conserved hypothetical protein	SA2059	COL	1
ATCTTTTTCACATTTATATTATCAATCTTTTTCATTTTAATTAAGTCATCCCGATTAAATAATATATTAA	hypothetical protein	SA2058	N315	1
ATGAAAAAATTAGCAGTTATTTTAACATTAGTTGGCGGTTTATACTTCGCATTTAAAAAATACCAAGAAC	conserved hypothetical protein	SA2649	COL	0	1
ATGAAAAGAACTCAGAACTTGTAATTAGTGACATTAATAATAGAGATAATATCTCAAAAGGTGATAAAGT	rod shape-determining protein MreC	SA1704	COL	1
ATGAAAATTGTTAAGAAAGATTTCACAGGTATTAGCTTCTTAAACTTAGTAGACTTTGATGCATTATACG	phosphopentomutase	SA0124	COL	1
ATGAAAATTTCTCAGAAGCATTTTTAAAACAATTAATAGGAGTTAAAAATGAATTACACACAACAACTTA	dethiobiotin synthase	SA2428	COL	1
ATGAAATTAACATTAATGAAATTTTTTGTGGGGGGATTTGCAGTATTATTAAGTTATATTGTATCTGTAA	hypothetical protein	SA2496	N315	1
ATGAACAATTAATTGAAAACTTCAATACTTTACAAGATGTATTAGCTAAAGCTAAACCATCATCTGCTAA	ribosomal protein L1	SA0584	COL	1
ATGAAGAATTATTACAACAAGGTATTACTCTAGGTATTACAACTAGAGGAGATGGTTTAAGCGACTATCC	conserved hypothetical protein	SA1030	N315	0	1
ATGAAGCTAAATCTGAATTTATTCATTTACAGCATGCATCATTACAATATTCTTTTTTAACGAATTTCTT	membrane protein, putative	SA0808	COL	1
ATGAAGTGATTACACAATGCGTACCTTCCTCATTAAACTTAAAAGTAGTTGTATTCGACGATAAAGATTA	ORFID:SA0665~coenzyme PQQ synthesis homologue	SA0665	N315	1
ATGAATAATGTATTGTTAGAGGTTAAAGATTTAGAAACATCATTAAAAATAAATAATGAATGGTTAGCAA	oligopeptide ABC transporter, ATP-binding protein	SA0997	COL	1
ATGAATTAATGACATTTTATAATTATAAAGAAATAAGAACACCAATTTTTGAAAGTACAGATCTTTTTGC	histidyl-tRNA synthetase	SA1686	COL	1
ATGACATAGAAAATAATCAAAATTTAAAAGTGTCAAAAGAATCTGGATTTAGAACTTCTTTACTTATGTA	ORFID:SA0229~hypothetical protein, similar to nickel ABC transporter	SA0229	N315	1
ATGACCATATGCATAGTCATGTAACTACAAATAATAAGAAAGTATTGTTTATATCGTTTTTAATAATCGG	cation efflux family protein	SA2138	COL	1
ATGACTGTAGATTGTCTATTGATACTAAGAATCGTAAATATCCTAAAGATATTATTGCTAGTCCACGAAT	DNA-3-methyladenine glycosylase	SA2339	COL	1
ATGACTTAGACCAAGTTAAATCATTTATTGATCGTTTACCTTTTGAACTAACTGAAGCACAGAAATCCAG	ATP-dependent DNA helicase	SA1070	N315	1
ATGATATACTGTTCATAACAGATTTATTAATTAGTGACTATTCATCTTTAATATATGAATATGCAGTATT	teichoic acid biosynthesis protein, putative	SA0242	COL	1
ATGATATCATTCTTAAAATTACAGGTATCAAAGTGATGAGCTTCCACAGTGATTTAAGTACAGTTACAGG	conserved hypothetical protein	SA0413	N315	1
ATGATCAATCAATCGAATATGGTAATAAAATTGAACGAATGATTCAAGATTTACACAAACAAGATAGATA	ribosome-binding factor A	SA1289	COL	1
ATGATCCATTTGAACATTAATGCCCTAGAAGACGGTATGTATAAGATTAAACATTTTACCTTAGATAAAG	ORFID:SA0097~hypothetical protein, similar to transcription regulator AraC/	SA0097	N315	1
ATGATCTTAAGTTGTCTTTTGTAGCTTGTCAGCATTCTTATCTAATAACACATCGATATAGCTTAATTCA	Conserved hypothetical protein	SAV0435	Mu50	1
ATGATGACAAAGATTTTGATCAATTTTTTAAAGACAATTATACTGTAGAAAAATTTACACAAGAGATTAA	ORFID:SA2159~hypothetical protein, similar to transcription repressor of	SA2159	N315	1
ATGATTATACCGTCCAAGTTTCGTTATGACTTAAATGAGCGTTTTATTATCACAAGAGGCCTTGATAAAT	mraZ protein	SA1191	COL	1
ATGATTATATAGAGGTAGTTGTTGGTAGAGAAGATGTTGAACAAGTTAAACCTGATCCTGAATTATATTT	hypothetical protein, similar to phosphoglycolate phosphatase	MW2241	MW2	1
ATGATTTAAATGATAATAAATTTTATTTTATGGAAATGAATACACGTATTCAAGTAGAACATCCTGTAAC	acetyl-CoA carboxylase, biotin carboxylase	SA1571	COL	1
ATGATTTGAAACATGTTAAAAAATTATCAACAGGTCATACTTTAGTAATGGGTCGTAAGACATTTGAATC	dihydrofolate reductase	SA1259	N315	1
ATGATTTGGTTTAATTTAAGTGATCGAGACCAATATACATTCCCTGTACCTATGTCAAAGATTTATCAAT	ORFID:SA1685~hypothetical protein, similar to A/G-specific adenine glycosyl	SA1685	N315	1
ATGCAACGCTTAATGATGCTGTTCATATTATGAGACAAAAGCGTGTTGATACTATTTTTGTAGTAGATAG	glycine betaine/carnitine/choline ABC transporter opuCA	SA2237	N315	0	1
ATGCATCATTTAATTGATACAGAACAATTTAAAATGATGAAATCTACGGTGTATTTAATCAATGCCTCTC	ORFID:SA2098~hypothetical protein, similar to glycerate dehydrogenase	SA2098	N315	1
ATGCATCTCAAGATAAATCAGATGATAATCAGAAGAAAACTGATGATAATAAACAACCAGCTCAGCCTAA	conserved hypothetical protein	SA0725	N315	1
ATGCTAGACCAGTTGTAGCAGATTCAGGTGCTATAGGCGGTAGCCATACACATGAATTTATGGCATTAAG	proline-tRNA ligase	SA1106	N315	1
ATGCTTTAAAAACGGATTTATCACTTCATCAAGTTCAACAAATGATTGATGATGCTTTGTTAATTGAACC	hypothetical protein	MW2300	MW2	1
ATGGAAACTGTATATATTGTTATAACTATGTCATTTGGTTAATTCAACATGACCTACCAAGAAATTATCA	conserved hypothetical protein	SA2132	COL	1
ATGGAATTCAGATGGATGCAGATTTAGTATTTGATGTACGATTTTTACCAAATCCATATTATGTAGTAGA	conserved hypothetical protein	SA0720	N315	1
ATGGATAGTGAATTTAAGGCAATTAAAAAAGCATCAAACAGTAATATGCTGCTTGATGCCCAAATGATGA	hypothetical protein	MW0353	MW2	0	1
ATGGATTTACAGATGTGGAAGCTAAAAATATAGAGGGACATGATGTCTTATTGTGGAAACCCATAAGATA	conserved hypothetical protein	SAV1176	Mu50	1
ATGGCAGTACCAAAAAGAAGAACTTCTAAAACTAGAAAAAACAAACGTCGTACGCATTTCAAAATTTCAG	ribosomal protein L32	SA1137	COL	1
ATGGCGAGAAAGTTGAAGATCCATATGATTATGAAAGTTATGAGAAGTTATTAAAAGATAAAATAAAATA	conserved hypothetical protein	SA2197	N315	1
ATGGCGCAAAATTAGGCACAAGCATTGTGAGCATCGTTGAAAATGGCGTAGGTTTATTAGGTAAATTATT	antibacterial protein (phenol soluble modulin)	SA1186	COL	0	1
ATGGGGCAACATTTATTTCTACAAATCCAGATGTGTCAATTCCAAAAGAGCGAGGATTTTTACCAGGGAA	haloacid dehalogenase-like hydrolase	SAR0891	MRSA252	0	1
ATGGGGTACGCAATCTACAACTACCCCTACTACACCGTCGAAACCATCAACTGGTAAATTAACAGTTGCT	bifunctional autolysin precursor	SAS0988	MSSA476	0	1
ATGGTAGTGCATTACAGATTAATAAAAACACAAATAAACAAGCTATTAAAGACTTTTTAGATGAAGATTA	transcriptional regulator, putative	SA1398	COL	1
ATGGTCAATTGCGGGATTCGCAAGCATAGTGACATTCATGTTTTATAAGGAATACTTTTATGAAGAATAA	hypothetical phage protein	SAS0903	MSSA476	0	1
ATGGTTTAGGATTACAAGAACATGAATATCAAGATGTTTCAAGTACTAATTCTAATTTGTTAGAAGCTGG	ORFID:SA1530~Xaa-Pro dipeptidase homolog	SA1530	N315	1
ATGTAGATGGACAGATACCTGTATATGTGTACTTTATAGATATAAGTTTAACAATTATATTTGCAGAGCT	ORFID:SA0834~hypothetical protein, similar to lipopolysaccharide modificati	SA0834	N315	1
ATGTCATAAATCATGTAGATAACAACGCATTTTTTGATTATATAACTGCACTTGCTAAAAAAGTAAATTA	inosine-uridine preferring nucleoside hydrolase	SA2276	COL	1
ATGTCGCTATGACTGCTAAAAAAGCAATTGAAGCAGGTGTGGTTGGTAAACCATTAGTAGCACGTGTACA	ORFID:SA0211~hypothetical protein, similar to NADH-dependent dehydrogenase	SA0211	N315	0	1
ATGTCTATAAAGATGGTAAAGTCATTGTTATTGGTATTCAATTATATAAAGATCGTGAAAAAATGTATTA	hypothetical protein	SA0291	N315	1
ATGTGAATTACTTCCTGTTATAGATGATTCCACATTTACTATTGATGAAGATGACCAACATTTACGAAAG	5 nucleotidase family protein	SA0130	COL	1
ATGTTAAAGATTTCATCAATTACCTTTCAACTTTAGATGTTGAAGTTAAAGCAGTATTTAGTCAATATTG	ORFID:SA1544~hypothetical protein, similar to soluble hydrogenase 42	SA1544	N315	1
ATGTTAATATATTAAAGGTTGATGCAAGCAGAACTTTGGAGGATAAATTATTGTCTAAGGAAAAAGTTGC	putative ribosomal protein	SAS0502	MSSA476	0	1
ATGTTATCTGCTCAAGATAGCTGGACACTTGCTAAACATTTAAAAACATTTCCAATCAGATTTAAACAAT	ORFID:SA0346~hypothetical protein, similar to cystathionine beta-lyase	SA0346	N315	1
ATGTTGATATTAAAGTAGTAACGCCTACTAAATTAACAGATAGACAAAAAGAACTAATGAAAGAATTTGC	dnaJ protein	SA1636	COL	1
ATTAAAAACAATGTTTAAAAACTTCAAAATATTATTGAAGACGCCACGTTTTGTATTACCAATGCTCATT	TcaB protein	SA2145	N315	1
ATTAAACCACATGTGACAATTAAAGCGCCATTTGAAATTGAAGATGGTGATTTAGATTCTGTCATTGAAC	conserved hypothetical protein	SA0873	N315	1
ATTAAACCATCATAAAATTGATTTAATAACTGATAATGGAGTGTTTTCGAAAGATAAAGTAGATTATGGT	conserved hypothetical protein	MW0496	MW2	1
ATTAAAGAATATGAAATAATAGAAAAGAAAACACTAGAAAATAATATATTAAAAGATAATATTAACCAAC	ORFID:SA1181~hypothetical protein, similar to exonuclease SbcC	SA1181	N315	1
ATTAAAGAATCAATATGAAGCATTAGCTTATAAAATCAATGAGCATTATGTCAAAATTTCATTAATTGGC	aspartokinase, alpha and beta subunits	SA1428	COL	1
ATTAAAGAGGCTGATAACACTGAAAAACAAACTGTTACTTCTCTAATGGAAATTATGTATGAAGATATGC	pyruvate dehydrogenase complex E1 component, alpha subunit	SA1102	COL	0	1
ATTAAAGATGCAGAAAATAACACTGAGCATTCAACAGTTTCTGATAAGAGTATAGCTGAACAATCTCAGC	elastin binding protein	SA1312	N315	0	1
ATTAAAGGCACATGCAGTTGAATTAGTAGAAGAAAATGTAGCGCTTCAACTTGAAAATGATAATTTGAAA	conserved hypothetical protein	SA0444	N315	1
ATTAAATAGTTTGAGTAAATATTTTAACCAAAAGTTAAAAGCACTCAATGTTAATTATAATAGTTCAAAC	8-amino-7-oxononanoate synthase, putative	SA2425	COL	1
ATTAAATCAACTGATTTAGCTAAAGAATTAATTAAGTATAATCAAACAGGTATGACATTAAACCAAGTTG	partial autolysin	SAV1052	Mu50	1
ATTAAATTAGCATTAAACTACCCATTAATTATGCTATTCCATACGCCGGGGGCTGTTTTAAGCACAAGTA	putative polysaccharide biosynthesis protein	SAR1839	MRSA252	0	1
ATTAAATTTATCAAATACTGCTGCGTTGTTAATTTATGAAGCGTTACGTCAACAAGATTTTCCAGGATTG	conserved hypothetical protein	SA1672	N315	1
ATTAACAAAAGAGACTGTATTGAAAATTTATGAGGATACTAATATTGATACCTTAGATTTATTAAATGAG	biotin synthetase	SA2426	COL	1
ATTAACAAAAGCGTTTGATGTGTTAACAAAGGATGAATTAACAATCTTACAACAAGCGTTTAAGAAACTA	transcriptional regulator, MarR family	SA2531	COL	1
ATTAACATATCTTTATAATAAAGATTTAGAACGCACTGGTTTATTAAATACAGCTGCATTGTTATTGAAG	mannitol-1-phosphate 5-dehydrogenase	SA2149	COL	1
ATTAACGGACACTCTCTAATAGATACCAGCATTTTAAATAAGACACTACAGTCACAATATGATAAAGAAG	hypothetical protein, similar to transcriptional regulator	MW2312	MW2	1
ATTAACTATTATTATTACAATTTTAATGTCTAAAAAGGTTAACTTTAAAGATGCTGTTAGATTATTCGGC	L-lactate permease lctP homolog~ORFID:SA2156	SA2156	N315	1
ATTAACTTTGATGATATGGATGAAACTATTTATGAAAATGCTTATCCAATCTTAAAAAAATATAAAATAC	intercellular adhesion protein B	SA2691	COL	0	1
ATTAAGCAATTAGGTATTATAGATGATGTCATTTCTGAACCACTTGGCGGTGCACATAAAGATGTTGAAC	acetyl-CoA carboxylase carboxyl transferase subunit alpha	SA1522	N315	1
ATTAAGTTATAAAAATGATTTGAAAAATAAAGTAGAAAACTTAAACAATTTAAGTCCAACTAATACAATG	exodeoxyribonuclease VII, large subunit	SA1568	COL	1
ATTAAGTTCTAATGCTAAAGGTGACGCCGACATGTTAGAAACGGAACTTCATGCTGTTATAAACGCAATG	conserved hypothetical protein	SAR2738	MRSA252	0	1
ATTAAGTTTGTTGATGGCTGTTTTGGAAAAGAAAGAAAATTATCTATTACAACAACAAGATGCTTATATC	DNA repair protein RadA	SA0572	COL	1
ATTAATAAAAGATTATTATGAACCATGGAACTATAATTATGAACATTTAACAACTGCGAAATCAGGGAAG	nitrate reductase beta chain narH	SA2184	N315	1
ATTAATAAATTGTTTAATACACACGGTGCGAAATATCGTGAGCTTGATTTGAAAAATAAATTACAAACTT	ORFID:SA0759~hypothetical protein, similar to arsenate reductase	SA0759	N315	1
ATTAATAATGATTTTATTAACAATATTCTGTTGCTTAGTTTTAAATAAATGGTTTGTATCTGCAGTAATT	conserved hypothetical protein	SA1418	COL	1
ATTAATAGATAACAACTACCGACCAATATTAAATTTAATTAGTCGGAAATCGTCACACAAAGAAGATTAG	lipophilic protein affecting bacterial lysis rate and	SA0702	N315	0	1
ATTAATGAAGAATTAACAGTTATAAATGAAGCAGTAAAAGATAAAATTGAGCAATTGAAAATGGTTGACA	ATP synthase delta chain	SA1908	N315	1
ATTAATGATATCAACGATATGAAATTAGACTGTAAAGATGAATTTATTAAGATAGATGAAGATAAATGCT	ORFID:SA2319~hypothetical protein, similar to beta-subunit of L-serine	SA2319	N315	1
ATTAATGGATAAATCCTATAAGCAGTTTGGTATAAAGAAAGATGATATTAGACAAACATATTATAAATAA	N-acetylmuramoyl-L-alanine amidase, family 4	SA2298	COL	1
ATTAATTAATGAAGGATTTAGAATTGTTTCTGGCGGTACAGATAATCACTTAGTAGCTGTTGATGTAAAA	serine hydroxymethyltransferase	SA2105	COL	1
ATTAATTATAACTTTAGAAGGTTTGTTAGATGTGTTGAATCATGACTTTGATATCCCTATTTCAGAGCGA	conserved hypothetical protein	SA1981	N315	0	1
ATTAATTCAGATGTTAATGTAACGGTAAAAGATAAAATAATGACTTTATCAACGTGCGAAGATGCATATA	conserved hypothetical protein	SA0982	N315	1
ATTAATTGATAGACCAATTAGACCTTTATTCCCTAAAGGGTATAAGCATGATGTTCAAATTATGAACATG	polyribonucleotide nucleotidyltransferase	SA1117	N315	1
ATTAATTTATTAAAAGACTATCAAGTGAATCAACAGATGTTTGATTTAACAGGTAAAGATTCAACGATAT	ornithine carbamoyltransferase	SA2656	COL	1
ATTAATTTTGCATAAAGATGAACCTATGTATTTAAAAAAACGTACATGTGTACCTACTTTGTTAATTAAT	hydrolase, alpha/beta hydrolase fold family	SA0671	COL	1
ATTACAAGAATATACAGTATTTACGTCATTGGTGGTGCAGCAGTTATAGCAATTGTTTTAGCATTCATTG	uracil permease	SA1042	N315	1
ATTACACACTATCAACGATTATTAAATTACATTACTCCTGATAAAGTACATGTAATGTATGCTGGTAAAG	FeS assembly ATPase SufC	SA0914	COL	1
ATTACATATGGATATACGACTGAGGGAACGTGGGTCAATCTATTATTTAAATCTTTATCGCTCAGCATGA	conserved hypothetical protein	SA2542	COL	0	1
ATTACATGCTATTGATTGGATTATCACGAATAAAGATGAAACAGAAACATACTTAAATTTAAAAATATAA	ORFID:SA0299~hypothetical protein, similar to carbohydrate kinase, PfkB	SA0299	N315	1
ATTACGAAAAAGAAACTCAGAACACTTTAATGTGGAGATTGCTAAATAATGAAACAATTACATCCAAATG	conserved hypothetical protein	SAV1090	Mu50	0	1
ATTACGATTAGTTGAAAAGTCTGTTAATCAAGACAATCCTTCAATGTATCATTTGTTTTATGGGGACGAA	conserved hypothetical protein	SA0326	N315	0	1
ATTACGTTTATCTTTAAACAATTGCTATTTATATTTATTGTCCCTTTCATTTATCCATATAAAAAAGAAG	hypothetical protein	SA1766	COL	0	1
ATTACTTAATTGCTTCAGACTATTCATTTGTAAATCCAGAAGATAATGACTTAGATCAAGGTTTTGAATG	tRNA (5-methylaminomethyl-2-thiouridylate)-methyltransferase	SA1676	COL	1
ATTACTTGCGATAATTGTTGTTTTATCAATCTTGCTTGTTGTCCAAAAACATCGCAATGATATCGATGCA	hypothetical protein, similar to cell-division initiation protein	MW0462	MW2	1
ATTACTTTGATTGTTGTAGATATTATTATTTACTACCCATTCCTAAAAGTTTATGATAGTGAAATTCTTG	PTS system, lactose-specific IIBC components	SA2181	COL	1
ATTAGAAAAACATGGTGATAAAATTGTATTACCAGTAGACACTAAAGTTGCTAAAGAATTTTCTAATGAT	phosphoglycerate kinase	SA0839	COL	1
ATTAGAAGAAGCAAAATTTGCAATTAGTGTGTTAGGTGGTAACGTTACAGAAACACATACCTTTAAATTG	glucose inhibited division protein B	SA2499	N315	1
ATTAGACATCTTAAAGAAGAGTTGAAAACTGCATATGAAAATACAAGACCCAAAATAGATAAATCAGTGC	transcription-repair coupling factor	SA0461	N315	1
ATTAGAGAAATTAGAGAAGAAATGAAATGTGATCTAATTGTTGGAGACAAAGTCATAACTACAGAACATG	ORFID:SA2278~hypothetical protein, similar to mutator protein mutT	SA2278	N315	1
ATTAGAGATCAATACTGGATATTAATTCAAGAAAGTAAGCGTAAAGTTAGACGTGACTACGAATTCAATG	poly D-alanine transfer protein	SA0796	N315	1
ATTAGAGCAAATTGTTCAAAAATTAGATAATGAAACAGTATCTTTAGAGGAATCATTAGATTTATATCAA	exodeoxyribonuclease VII, small subunit	SA1567	COL	1
ATTAGATCAGAGCGATGTAGTCAGACATCCATTGGTAAGTAAGATCATTGAACATTATGAAGGAGAGAAT	PhoH family protein	SA1628	COL	1
ATTAGATGTAGATAATAAAGTTGTTTATAAAGAAATCGTTAGTGAAGGTACTGATTTCCCAGATTTTGAT	ORFID:SA1535~hypothetical protein, similar to thioredoxin peroxidase	SA1535	N315	1
ATTAGATTTAAATGGCAAGGAAATATTACTCGTTGACGATATTTATACAACTGGATTAACAATTCATCGT	ORFID:SA0706~hypothetical protein, similar to comF operon protein	SA0706	N315	1
ATTAGCAGGTATTGAAAGTAGAATACCTGTTGATGAAGTTATTGAAGCAATGGATAAGGTTGGTCGTAAC	ORFID:SA2318~hypothetical protein, similar to L-serine dehydratase	SA2318	N315	1
ATTAGCGCATTTTAATGAAGTGGATGCAATTCCAGAATTGAAAAAAGTTGCAACAACAGATGAAAGACCG	conserved hypothetical protein	SA1673	N315	1
ATTAGGAATTCCAGTTAAAGTGTCTGTATCAACTAACTACAATACAATTGTTGAAGCTATGAAGTCTAAA	ORFID:SA0138~hypothetical protein, similar to alkylphosphonate ABC tranport	SA0138	N315	1
ATTAGTAATAATAATATTACAGATCCAACTTTAAACTTAGCAATGGAAGAATATGTTTTAAAAAATTTAC	lipoate-protein ligase A family protein	SA1034	COL	1
ATTAGTAGAAATTGCGTATCAAGGAAATAATTTTCTAGGCTTTCAAATTCAACAGAATGGACGTACGGTA	tRNA pseudouridine synthase A	SA2018	N315	1
ATTAGTATCACTGCTGGTTGTGGCATAGGTAAAGAAGCGAAAATAAAGAAAAGTTTTGAGAAGACATTGA	hypothetical protein	SA0081	COL	0	1
ATTAGTTGAAAAAGAAAGACGATTTACTAATTTAGAATACAAGCAAAAGAAAAAAGAATATCATGATGCC	conserved hypothetical protein	SA2318	COL	1
ATTAGTTTAAACAGTGAAGATATCCGTGCTGAGAAAGTAAAAGTACTTAAATCACTGCGTCATTTCCAAT	glucose-6-phosphate 1-dehydrogenase	SA1336	N315	1
ATTATAAAAACTTTAAAACTAGAACATTTAAATCAACATATGAAATTGATTGGGAAAATCACAAAGTGAA	gamma hemolysin, component B	SA2422	COL	0	1
ATTATATATTAGAAATTTGTGACAAAGGCTTAGAACAAGCAATTAAAGATAATGAAGCCTTAAGTACTGG	alanine dehydrogenase	SA1478	COL	1
ATTATATCCAAAAGTATATGAACAATATATTCAAACTAGAAATCAATACGGAAACTTATCGTTACTTGAT	pyruvate carboxylase	SA0963	N315	1
ATTATATCTTCATTAGTAGAAAATATCATCATGCCATTAATTGGTAAAATTTTCGGATCAGTTGATTTTG	large-conductance mechanosensitive channel	SA1182	N315	1
ATTATATGAACAAAATACTCATATAGGAGGCAAAGTGAATCGTCATGAATCAGATGGCTTTGGCTTTGAT	ORFID:SA2351~hypothetical protein, similar to phytoene dehydrogenase	SA2351	N315	1
ATTATATTTACCTGTTATTTTCAAAGTAATAAAATTACAACTCAATTTATCAAAAGGATTAATCGATGAT	hypothetical protein	SA1670	N315	1
ATTATATTTAGTGGGCACACCAATTGGTAATTTAGCAGATATTACTTATAGAGCAGTTGATGTATTGAAA	tetrapyrrole methylase family protein	SA0531	COL	1
ATTATATTTCAGAAAATACGGGTTATCCATTTGTATCTTCTGAAAATAAATTCCATGCATTAACAGCACA	fumarate hydratase class-II	MW1792	MW2	1
ATTATCGAAACAGTGTTATCAATGGGGATTTATCCAACATTGAAAGAAATATTACGTCATCGTGACATTG	N-acetylneuraminate lyase subunit	SA0304	N315	1
ATTATGAATTATATCAAGATAATGAAAAAATGGGTTCTTATCAATATGAAATTAACTATAAGGAGATAGG	conserved hypothetical protein	SA0662	COL	1
ATTATGATATTAAAACGGTATTTAAGGCGAATATTACGGATAGACGCAAATGGAGAGACAAGTTTAGATT	ORFID:SA0243~hypothetical protein, similar to teichoic acid biosynthesis	SA0243	N315	1
ATTATGTACAATCACATTCATTTATAAAATCTTTAGTGTTAGGTATTTCAGGAGGACAAGATTCTACATT	NAD synthetase, prefers NH3 over glutamine	SA1728	N315	1
ATTATTAAAAGAGCAATTAGAAGATGTGCTTGATACATTAACTGATAGAGAAGAAAATGTATTACGATTA	RNA polymerase sigma-70 factor	SA1618	COL	1
ATTATTAAACATTTTTTCTGTAAAATCATTTGGAGAAACTGAGTTTTGGTTATCATTGATTAAAGTGTTA	amino acid permease	SA1367	COL	1
ATTATTAGATCCTGAAAAATATAAAAATGCAAATGAAGAAGAATTAACAGATATATATGATTTTGTTCAA	conserved hypothetical protein	SA1938	COL	1
ATTATTCATAGACTATATAAATTTAGCGAGAGATTACTATCAACAAATTATGAATGACTATAGTACTACA	transcriptional regulator, TetR family	SA2349	COL	1
ATTATTGATATACCTAAACGTGTCTTTGCCAAATTAGATATTCCAGCAAACACTGAACCTATTCGTGGTG	aminotripeptidase	SA0698	N315	1
ATTATTGTACTGATGAAATATATCAACAATTAAAAGCTAACAATCAAATTATTCTGAAATATGTGAATAA	phosphoribosylformylglycinamidine synthase I	SA1077	COL	1
ATTATTTAAATCATCAAATGACTTTTAAAGAAATATTTAATCTCAAAGATATTGATGTCGATAATAAGGG	conserved hypothetical protein	SA1380	N315	1
ATTATTTATACCAGCAATGATTTTAAGTTTATTAATTCTATTCTTTTACTTATTTAGTGATGGATTACGT	oligopeptide ABC transporter, permease protein	SA0992	COL	1
ATTATTTCTATTTAATTGAAATTGGTCAAAAGGAACAAGCAATTACTATTTTAAATCAATTGTTGGAACT	conserved hypothetical protein	SA1296	N315	1
ATTATTTTAACATTTTTAGGAATGATTACTGCGACAATTTTAGGGAGATTTGAAAAAACATTAGAAAATG	ORFID:SA0867~hypothetical protein, similar to Mg21 transporter	SA0867	N315	1
ATTCAAATTGATACAACAAATATCTTATTTATTCTTGGTGGTGCCTTTGATGGTATTGAAGAAGTGATTA	ATP-dependent Clp protease, ATP-binding subunit ClpX	SA1721	COL	0	1
ATTCAACAGCGACAAGTCAAACGCCTATGCAAGTGTTAAATGTTTTAGAGGATTACTACAAGCGTTATAA	ORFID:SA0776~aminotransferase NifS homologue	SA0776	N315	1
ATTCAGATTCAGATAGCGACTCAGACTCAGATAGCGACTCAGATTCAGACTCAGATGCAGGTAAGCACAC	Ser-Asp rich fibrinogen-binding bone sialoprotein-binding protein	MW0517	MW2	0	1
ATTCAGATTCAGATAGCGACTCAGACTCAGATAGCGATTCAGAATCAGACAGCGATTCAGACAGCGACTC	putative surface anchored protein	SAS0520	MSSA476	0	1
ATTCATATCAATACAATAACTATACAAACAATAGCCAAACAGCAACAAATAACTATTATACTGGTGGTTC	ORFID:SA2353~hypothetical protein, similar to secretory antigen precursor	SA2353	N315	1
ATTCATGGGACTAATAGCTAAATATCCAATCGCATTAGCACCAGGTATGGGATTAAATGCATTCTTTGCA	conserved hypothetical protein	SA2050	N315	1
ATTCCAGATTTTAATAATGATGAAATAGAGATTGAAATCAATCCGGATGATATTACAGTTGATACATTCA	peptide chain release factor 2, programmed frameshift	SA0818	COL	1
ATTCCAGTAATTGGGACAGTTAGTGGAGGCGTAGTTGGAGCTGTTGGTGGTGCTGTCGGCGGTGGTCTAA	hypothetical protein	MW0373	MW2	0	1
ATTCCTTTGTTAATATAGATGGTACTGATAATTTACTTGTTCTAAAAACGTTACCTGGTAATGCACAATC	arginine repressor	MW1473	MW2	1
ATTCGAGAATGTTAAAAACGTCAGCTGTAATTTCTAATACATTATTAGTCATAGGTTTAGTCTGTCTATT	conserved hypothetical protein	SA2299	COL	0	1
ATTCGATTCTGATATTCAATTAGAATATAACGGTAAGAAAGTAAACTTAAAATCAATCATGGGTGTTATG	phosphocarrier protein HPr	SA1091	COL	1
ATTCGTATTCTACCTGGCGACAAAGTAACTGTTGAGATGTCTCCGTACGATTTAACACGCGGAAGAATTA	translation initiation factor IF-1	SA2217	COL	1
ATTCGTGAAAAAATGTCACGCAGAAAGAAAACAGCTGCCAAAAAATTATTAGAGGTATCTAATAATACAG	dihydrolipoamide succinyltransferase	SA1244	N315	1
ATTCTCAACACAAATAGCACACTATTATAAAAATCAACCAACTATCACTTGGCCTGAACAATTAGGACAT	conserved hypothetical protein	SA2138	N315	1
ATTCTGAACTAGTTGGTATCATTGTTGCATTTGTAGTGTTATTGATTACATTTGGTTCAGTCATTGCTGC	hypothetical protein, similar to antibiotic transport-associated protein	MW2473	MW2	0	1
ATTCTTATATATCGGTTATTCAATTATTGACTTACCATATATTCCTTTATTAGTTCTATTTGCTGGTGTC	conserved hypothetical protein	SA0870	N315	1
ATTCTTCTTAGTCTTTTTCTATGCCTTAGATTTAGGAATTACAGCATTGAAAAATTTATTATTTGGTTAG	preprotein translocase subunit	SA0493	N315	1
ATTCTTTAAATTGTTAACGGAATTTATAAATATAATGATTCATGGACTACTACTTTCAGTGTTCATTACG	hypothetical protein	SA0931	N315	1
ATTGAAACTATTATAAGTGAAATAGAAAAGTTATTAACTAACAATACACCATATAGTATTTCAAAAAATT	hypothetical protein	SA1151	N315	1
ATTGAAAGTGTCTTTGGTCAAACAATAAATAATTTAAAAGAGAAAGAATTAATTGTAGAAAAGAACGATG	oxygen-independent coproporphyrinogen oxidase III	SA1412	N315	1
ATTGAAGGTAATATTATTAGAGAACATTACAATCAAAATGGAGATGTATATCGTTATTTTAATAAAGAGC	ORFID:SA2424~hypothetical protein, similar to transcription regulator Crp/F	SA2424	N315	1
ATTGAAGTAAACAGTGTGCACGTAAAAAATGGGAACACAAATAATACTAAAGTAAATTTAAATACCGCAT	ORFID:SA1418~hypothetical protein, similar to late competence operon	SA1418	N315	1
ATTGAATGTTGATGGGAAAATCGTAAGCGCTGATGTTCAAGCACAGACAAAACAAGTTTTAGAAAATTTA	ORFID:SA0455~translation initiation inhibitor homologue	SA0455	N315	1
ATTGATGTTAGTAATTTTACATAAGTGGACTGTTTTTATACAACATCTTATGAATATTTTAAGTGGTGGT	hypothetical protein	SA1394	COL	1
ATTGCAAATCGTATAAATTCACAATATAATCGTGTAATGGAAACAAAAGTGAGAATCACTAAAGAAAACC	7,8-dihydroneopterin aldolase	SA0473	N315	1
ATTGCAGTACCTGCCTTAACAGAAGAGCGTAGAAAAGAGCGCGTTAAAGATGTTAAGAAAATTGGTGAAG	ribosome recycling factor	SA1102	N315	1
ATTGCGGCAGTTACAAGTGTTGTACCATATTTAGGGCCTACTATAGCGATTTCTCCAGCTATTGTAATAG	conserved hypothetical protein	SA1395	COL	1
ATTGGCTTAAAGAGATGGCACATACATTTCCAGGTCGTATTTATCTGTCAGTTGATGCTTATGGAGAAGA	ORFID:SA2466~hypothetical protein, similar to phosphoribosylformimino-5-ami	SA2466	N315	0	1
ATTGGTATTATTGGCATGATACTGATAACTATAAACATAACAACGCTCGGTGATAATTTGCTATTTATGC	conserved hypothetical protein	SA1403	N315	1
ATTGGTTCAATATAGAAAAAATAAATATAGATGTTGAAGCATCTACAATTAATACAGATCCATTTCAATA	conserved hypothetical protein	SA1388	N315	1
ATTGGTTTCTTAATATATGGACCAGTTATGTTAATTGGTTTACAAGCATTAGATTATGTACCTAAAAAAG	glycerol-3-phosphate transporter	SA0407	COL	1
ATTGTACGAAACGTTATATATGGTATCTATTGCTTTATTTTTAGGAGCAGTGATTGGTATTCCATTAGGT	ORFID:SA0421~hypothetical protein, similar to ABC transporter permease	SA0421	N315	1
ATTGTCGATATTATTTTAGCAACATTACTAGGCTTACTAATCGTTTATACTGGTTTTGGTATTTTTAAAG	cation efflux family protein	SA2416	COL	1
ATTGTCTGTAGAAATTGGGAATCCAATTTCTCTTTGTTGGGGCCCCTCCCCAACTTGCACATTATTGTAA	hypothetical protein	SAS080	N315	0	1
ATTGTGGAATAAAGTCAATCCATCCTTCGCGCTAAAATTTAACCATAGTATAATAAATAATAGTAGTTAA	conserved hypothetical protein	SA0761	N315	0	1
ATTGTTAAACCATTGCCTAATGGTAGCTTCCAAATACTCACAGAAATAAATTTGGAGAATGGCAATATTA	hypothetical protein	SA0748	N315	1
ATTGTTGATGAATTAGTCATCATTGATTTAGACACTGAAAAAGTTCGAGGAGATGTTATGGATTTAAAAC	L-lactate dehydrogenase	SA0222	COL	0	1
ATTTAAAACTTATTTTGTAACTAATGAATTAGTGTTGTTTTATAAAAATGGTATTACACTTCAATCAATA	competence protein ComGB, putative	SA1600	COL	1
ATTTAAAAGAATCATTAGATTTAATTGATTTATCTCCAATTACAATCCAAGGTCAGTTAACCATTAAGTC	conserved hypothetical protein	SA1136	COL	1
ATTTAAAGAAGTTCCAGAATTAACAGATGAAATTGCTAATGAATTAGATGCAGAAGCAAATACAGTAGAC	trigger factor	SA1499	N315	1
ATTTAACAGATTTACAACAAGATATGTATAGACGTTATAAAATTGGACCTAAAGAAACATTGAATACACT	DNA topoisomerase III	SA2243	COL	1
ATTTAACATCAGATGATATAGATTTATTTATTCCTCATCAAGCTAATATTAGAATTATGGAATCAGCTAG	3-oxoacyl-(acyl-carrier-protein) synthase III	SA0987	COL	1
ATTTAACTGAAGGTAAAGATGGACGTTTACAAACATTCAAAGTTATCTTTGCTCTTGTAATTACACTTTG	quinol oxidase, subunit IV	SA1067	COL	1
ATTTAATCATACCTATTTATGGTAAAGCTGAAAGTTTAAATGTAGCGATTGCAGGTAGTATTTTACTTTA	RNA methyltransferase, TrmH family	SA1147	COL	1
ATTTAATCGGACAATCTTCTTATATTAAAAATAATGATGTCGTAATATTCAATGAAGCATTTGATAATGG	phospholipase C	SA2003	COL	1
ATTTAATGACACATCCAAGATATCAAATTAAGAAGAAATATGTAGCAAAATTAAAAGGTTACTTAATGAG	ribosomal large subunit pseudouridine synthase B	SA1324	N315	1
ATTTAATGATAGGTACTTTATTTTTATTTTTGGTCTTAGTGATTTTTACATTATTTACATATAAAGCACC	ORFID:SA0298~hypothetical protein, similar to regulatory protein PfoR	SA0298	N315	1
ATTTACATCATTTAAATATGTCTAAAGATATTACTATTAATGATAAACCTGCGCGATTAATGGATAAAGT	ribosomal large subunit pseudouridine synthase, RluD subfamily	SA1907	COL	1
ATTTACTAAAAATAAAACAAGTACGGTCATTGTTTCAAAAGAATTTTTATCAGAAGAAGATACTGTACTC	xanthine phosphoribosyltransferase	SA0373	N315	1
ATTTAGATATGACTACAGCATTTAAGTTATTCAATAATCCTCAGTATGAAATTTACAGTAAACTATTCAA	conserved hypothetical protein	SA1988	COL	1
ATTTAGGCTATATTTTAGTTGCATTATTTTTAATTACTTGGCTTATTTCAAGTTTAATTTGGAAGTTTGG	high-affinity nickel-transport protein	SA2721	COL	1
ATTTAGTGAATTCAATCATAATAAAGATCATAGTTACACACCATTACCTAATAAAAATATTGATACCGGC	alanyl-tRNA synthetase	SA1446	N315	1
ATTTAGTTATATTGATGATGAAGCAAATAATCATTTAAGACAATTACATGAAATTAGACCGAATCACTTT	oligopeptide ABC transporter, ATP-binding protein	SA0994	COL	1
ATTTAGTTGGACCAAAAGGCATTATCAGAAGAATGGTTGACACAAAAAAATTAACTTCAATGATTTTTTA	conserved hypothetical protein	SA1454	N315	1
ATTTATAAAGATGTTACTAATGAATTTAAAGCACATCAAGCATACTTTGTTAAAAAAGATGAATTACAAC	alcohol dehydrogenase, iron-containing	SA0135	COL	1
ATTTATACTGGATCATTATATTTAAGCCTAATATCATTACTTGAAAATCGTGATTTACAAGCTGGTGAAA	3-hydroxy-3-methylglutaryl CoA synthase	SA2334	N315	1
ATTTATACTTTGAAACAAGCGCCGTACTACTTACCTTAATCTTATTCGGTAAGTATTTAGAAGCTAGAGC	copper-transporting ATPase copA	SA2344	N315	1
ATTTATCATTTTATATGCATATTCAATGCTCGTTTTGCTTGCGTTAGTAATTTCTAACATATTCATTCAC	hypothetical protein	SA0077	COL	1
ATTTATCTAATGAAATCGAAGAAAACATATATAGAGCATTACAAGAGTGTATTAATAATGTTAAGAAACA	ORFID:SA1667~two-component sensor histidine kinase homolog	SA1667	N315	1
ATTTATCTACAATGAGCATGAAGTTTATTACTTATCTAGTGGTTCAAACCCTAAATATAATGCTTATATG	fmhA protein	SA2409	COL	1
ATTTATGAATACATTCGAGTATATAATGGTAAGTTATTTACAGTAACAGAACATTATGAAAGATTTTTAC	D-alanine aminotransferase	SA1800	COL	1
ATTTATGTAGATAAGATTTCTGGTAAACCTTTATTTACATCTGAAGAAAAGTTTCATTCTGAATGTGGAT	conserved hypothetical protein	SA1256	N315	1
ATTTATTAGAAAATACAAATCTGAGTCAAACTTATCAACATACTAAATCTATTATCCTAGACAACAAATA	conserved hypothetical protein	SA0306	N315	1
ATTTATTATACTATGGTTAATTCAGTACAATCATCATATGCAGATAGTACACACCTGATTGGTATTGCTA	lytic regulatory protein truncated with Tn554	SA1956	N315	0	0
ATTTATTTTATACATGATATTAATTTTTACTCTATCTATGATTGTTAATATTCACATCGTGTGGATTATC	ORFID:SA0874~hypothetical protein, similar to multidrug resistance protein-	SA0874	N315	1
ATTTATTTTCAACGCATCAGCTTAAATTCAATAATAGTACATATATGCTTAAAATTTATATGGCTAACAC	ORFID:SA0216~hypothetical protein, similar to two-component sensor histidin	SA0216	N315	1
ATTTCAACATTAAAGCAAGAAGAGCAAATGAAGGCTGTTCAAACACATGACGTACTGCAATTGATGAACC	two-component sensor histidine kinase	SA0250	N315	1
ATTTCAAGAAAAAACATATACAGTACAAGAATTAACTGATGCTCGTGCTAGTGAACATTTCGATTATGTA	aspartate semialdehyde dehydrogenase	SA1226	N315	1
ATTTCATCCACTATTTATTAAACCTAATAAAGATGAATTAGAAGTGATGTTTAATACAACAGTGAACTCA	fructose 1-phosphate kinase	SA0654	N315	1
ATTTCTGTTTCTATTTTTATCGTTATGATGTTACTTATGAATTTAATCTTACCTGGTTCAGGTCTATTGT	ORFID:SA2241~hypothetical protein, similar to chloramphenicol resistance pr	SA2241	N315	1
ATTTGGTAAATGACATTGTTGTAAAAACATTGCTATTCTTTATTATTGGTAGTTTAGTTTACATTACAGG	MnhD homologue, similar to Na1/H1 antiporter subunit~ORFID:SA0581	SA0581	N315	1
ATTTGGTTTTATTATTGATCGATTCATTAGTTATATTGAGCAGTTTATACTTAGAAGATTTGGTGAATAA	ABC transporter, permease protein	SA0159	COL	1
ATTTGTATGACACATTATTGATGAATTATAACTTTGTCATTATCGATACGCCACCAGTGAACACAGTTAC	capsular polysaccharide biosynthesis, capB	SA2456	N315	0	1
ATTTGTTCGATTTAGTAATTTCAATGAACTATTTCAATTTATTTTCAATGAATATTACGATATTAACTTT	transcriptional regulator, AraC family	SA2378	COL	1
ATTTGTTGCTGTAATAATTTTAAGAAAACGTGAACCAAATATGGAGCGTCCATATAAAGTACCGTTATAT	ORFID:SA1270~hypothetical protein, similar to amino acid pearmease	SA1270	N315	1
ATTTTAAAAATGAATCATGGGTTACGTAACTTAATATCATTTACAGGTGATACATTAGATCATTTATGGC	N-acetylglucosamine-6-phosphate deacetylase	SA0761	COL	1
ATTTTAAAATTTTAGATCATCGTTTAACTTTCCATGGTGTGTGTGAAACATGCCAAGCTAAAGGTAAAGG	ORFID:SA1329~ferric uptake regulator homolog	SA1329	N315	1
ATTTTAAAGACGACAAAGACAGAGTATTAATTAAAAATGACGGTACATATACGTATTTCTTACCAGATAT	arginyl-tRNA synthetase	SA0663	COL	1
ATTTTAAAGATATTAATGATGTTTTTGATGCATTCCAAGAAATGGCACATAATGTTAAAAAAGGTATTAT	UDP-N-acetylmuramate--alanine ligase	SA1790	COL	1
ATTTTAAAGCGGCTCATATTGATACATCATATATTATCAAAACAACTGAAGCAAAAACGGGCCAAGCCTT	probable ribokinase	SA0258	N315	1
ATTTTAATTTTGTTTTTAATTAACTTTAGTAATAATGCCGATAAAACATCCATTAAAGTTTACAATAGAG	sodium transport family protein	SA1030	COL	1
ATTTTACTAAGGCACACGAAGAGTTACAAATATGCGCTCAACATTTGCAGATTAATAAACCTACTTATGC	ORFID:SA2189~hypothetical protein, similar to NirR	SA2189	N315	0	1
ATTTTAGAACAGTTGAAAACACATACTCAAAATAAACCTAATGACATAGCATTACATATCGATGATGAAA	substrate--CoA ligase, putative	SA0621	COL	1
ATTTTAGATTTTAATTTAGAATTAACAGAAGTAGCTGAAATTGATGCTTTAGATAGAAATGCAAGACAAG	ORFID:SA0658~hypothetical protein, similar to plant-metabolite dehydrogenas	SA0658	N315	1
ATTTTATACCTGGTGTTTTTGAAGAGAATGTGCGTCGCGTAAAAGCTTTGGAAAGCCTAGCTGCAGCACA	ORFID:SA0557~hypothetical protein, similar to oxidoreductase, ion channel	SA0557	N315	0	1
ATTTTATTTATCGTCTCCCTTTTTGAGACTAAAATTTTTCAATTTATGACTTTAAATTTGTTTTTAGCAT	conserved hypothetical protein	SA0752	COL	1
ATTTTCATCTATTGATAATGAAGAAATCACTTATATTCTTGATTATGATGATACACAGCATATCCTCATG	cysteine protease	SA0899	N315	0	1
ATTTTCTAATTTATTAATGGTATGTCATCCATTGTTATTTATGTTTTTTACTAAAATTTTCATCCAATCT	glycosyl transferase, group 2 family protein	SA2578	COL	1
ATTTTCTTGGACAGCTAAATCTAGTGAACTAATAGAAAGAAAAAGATTGATGTGGGGAAGTTTATTATTT	nitrate reductase gamma chain	MW2316	MW2	0	1
ATTTTGAAGGGATTAGTTAAAAAAGAGAGATGTGAATTAGATGAAAGACGTGTTATTGTAACAATCAAGC	hypothetical protein	SA2091	N315	1
ATTTTGGTGATGTTGTAGAACTAGCAAAGAAAACAGAAGCAACAGTAATTGGAAGTGCAGAAATGGCTGA	metallo-beta-lactamase superfamily protein	SAR1785	MRSA252	0	1
ATTTTTAAGTTTAATCAAAGATACATCATTATTAGGATTTATTTTAGTGGCTGAAATGTTTAGAAAAGCT	amino acid ABC transporter, permease protein	SA2411	COL	1
ATTTTTATATAGTGTGGCACATTTTATTCCAAAAGATGTAATAAAACTTAACGCATTTTTGCTTTTTATA	hypothetical protein	SA2032	COL	0	1
ATTTTTATCAATCCTTATTGACGAATAAACAACGTAATTATTTGGAATTATTTTATCTCGAAGATTATTC	conserved hypothetical protein	SA1079	N315	1
ATTTTTATTTATAGTATTTGTAATGTATGCTATCCAATTGGGTTATATTTTTACGTTCCCATTCATAATG	tetracycline resistance protein, putative	SA0122	COL	1
ATTTTTCAAATCAACAAATTGTCAATGATGATGTTGTATTTCGGTTAAAAGCGTTGGCACAATTCACAAT	ORFID:SA0328~hypothetical protein, similar to NADH-dependent FMN reductase	SA0328	N315	1
ATTTTTCAAATCCGAATCTATTATTCCCATTATTAGATGAAGAGTTTCATTTGCCATTAGTTGTGGCAAC	dihydrodipicolinate reductase	SA1228	N315	0	1
ATTTTTTGTAATAGATGATGAAGAGGAAGTAGAAGTACCTGACAAACAACAACAGGTCAATGAAGCGCCA	conserved hypothetical protein	SA1032	N315	1
CAAAAACAATTTAACATCAAATTTAACAAATAAAATTGGTAATTCAGTCTTTAAAATAGAAAATGTTGAC	hypothetical protein	SA0933	N315	1
CAAAAAGCTAAAACTCTTAAGTTGACGAACTATAGTAAATTAAATAAAAAAGAACTTGTTATAGCTATTA	transcription termination factor Rho	SA1923	N315	1
CAAAAATATTTACTAAAATCATGAGAAATGGTGTACCATTGTACACTGTTGTAGCAGTATCTCTTGGTAT	ORFID:SA2109~hypothetical protein, similar to transport protein	SA2109	N315	1
CAAAAATTAATCGAAGAATCTCCTTGTGCAGCATTAACTGAAGAACGACGACAACAAATATGTAACGATG	ORFID:SA1434~acetyl-CoA carboxylase (biotin carboxylase subunit), accC homo	SA1434	N315	1
CAAAAGAAGAATTACATGAAGCTGATATTATTTTAAATAGTGCGGCAGATATTTTAGAAGCTTTAAATTA	hydrolase, haloacid dehalogenase-like family	SA0602	COL	1
CAAAAGAAGAATTAGATGAATGTTTCGATCCTAAACATCATTTGAATCAAGTTGACACTATTTTCGAACG	adenylosuccinate lyase	SA1724	N315	1
CAAACTAGCTGGTGTTTCAAGACAAACCATTTCGCTAATTGAGCGAAACAATTTTATGCCATCAGTATTA	ORFID:SA0337~hypothetical protein, similar to transcriptional repressor	SA0337	N315	0	1
CAAAGTCACAAAATGTTTTGGATAACAATGGCATTAATTATCATCACAATGGTATTAGGTGTCATTCTAC	conserved hypothetical protein	SA0830	N315	1
CAAATAAATGGTCTTGGTATTTTTTGTATAGGATGTTCTTGGTGGTACGTAAGGAATATTCGTGATCTTT	hypothetical protein	SAS014	N315	0	1
CAAATAATGAAATTTCTTTAGCCGAAGCAAAAACACAACTTGAAAAAATATATGTTGCTAAGCGTGACAG	conserved hypothetical protein	SA0543	N315	1
CAAATATTAAAGTTATTATTTCAAAATGAAGATAAATATGTAAGTAGAACTGCTTTAATTGAAAAATGTT	DNA-binding response regulator	SA2646	COL	1
CAAATCATATCGATAAAGTATGTGTCATGGTAAATCCTGATTTAACAACAATTGAACACGTATTAAGCAA	N-(5phosphoribosyl)anthranilate isomerase	SA1407	COL	1
CAAATCCAGAATCTAACCAAGCTTTAAGATTGGTACTTGAACGCGCTAAGACATATTCAGTACCGAATCA	conserved hypothetical protein	SAR0680	MRSA252	0	1
CAAATGCTAAGAGTTGGGCTGAAAATGAATTAGCGACTATGGGTAAAATCGCTTTAGCTGAAAATTTATG	2-oxoglutarate/malate translocator	SAV2694	Mu50	1
CAACAAGGTTTAAATAGTGATATCATAGATGAAACATATATAAACAATCATTTAATGACAAAAGACTATC	undecaprenyl diphosphate synthase	SA1279	COL	1
CAACAATTATTAATATGGTTGTAATGTTAAGTTTGTATGGTGGTATGATTTTATTACCAATTTACTTACA	hypothetical protein, similar to multidrug resistance protein	MW2273	MW2	1
CAACACAAAGGAGATAACTTCTCTATTGAAGAAGTTAAAAACATTATAGCAGACAATGAAATGAAAGTAA	hypothetical protein	SA0702	COL	0	1
CAACATAAAATTTTAGGACTCGATGTCGGTAGTAGAACGGTAGGAATTGCAATTAGTGATATAATGGGTT	conserved hypothetical protein TIGR00250	SA1671	COL	0	1
CAACCCTAACAACCCTGATAATCCAGACAATGGCGATACCAATAATTCAGACAATCCAGATGCAGCTTAA	V8 Protease	SA1057	COL	0	1
CAACGTAATAATCTGTCATTAGAAGATGCGAAAGCACGTGTCTATAGCCAAATTTCTATTGATAAAAAAA	conserved hypothetical protein	SA1511	N315	1
CAACGTAATATTACAATTAATGGATTGTTTCACAAGATGGTAAAGCTAGGATGTCTTTTTATTAAGAAAT	hypothetical protein	SA2429	COL	0	1
CAACGTTTGCATCCAAAATACTACATGCTGAACATATATTTGTAGCTGGTAAAGGACGTTCAGGATTCGT	conserved hypothetical protein	MW0526	MW2	1
CAACTACTGCCAATATAACTTCGTAGAGCATAGAACATTGATTTATGTCCCAGCCTGTAAGACTCAGTAA	hypothetical protein	SAR0402	MRSA252	0	1
CAACTCACTGATAAATTACAAGGAAGCGATAAAATTAATCATGCTATGATTGAAAAATTGGCTAAAAGTA	conserved hypothetical protein	SA2439	N315	1
CAACTGAATTGTTACTCTTATCCGAATTAGATAATCACCAACATTTATTATTCGATGATAAGATTCAAGT	ORFID:SA2152~hypothetical protein, similar to two component histidine	SA2152	N315	1
CAACTGGTGTTAGAATTACAATTGGTTTTAAAGAACAAAATGATAAAATGTTAGAAGTTTTATCAAATTT	ORFID:SA0679~hypothetical protein, similar to histidinol-phosphate aminotra	SA0679	N315	1
CAACTTTAAATAAGGTTTACGGTTGCATTTTGATACAACAACCGATTACTAAGTCATGCTTTCCACTTTG	hypothetical protein	SA2480	COL	0	1
CAACTTTATTTTAGTTCACGATATTATTAAAGAAGTTGATCCAGATGTACTAAGATTCTTTATGATTAGC	cysteinyl-tRNA synthetase	SA0576	COL	1
CAAGACCTCAGGACAATAAAAGTTTTTCTTCGAATAATACAACAACAAATACATCTTCAAATAATGTAGA	conserved hypothetical protein	SA1484	COL	1
CAAGATAAATCGTATGACTTATACTATGATGGTCAAACATTTTATCAACTAACAACAGACATGTTCCAAC	phosphomethylpyrimidine kinase	SA0626	COL	1
CAAGATGTTAAAGTTAAAATTAAATCTATTGATAGAGATACAGAACGTATTTCATTATCAATCAAAGATA	ribosomal protein S1	SA1516	COL	1
CAAGCTGATGCACTAGTTTCAGCATTAAATAAAGCATATGCAGATGTTGAATTTAAACTATACTTAGGAT	ORFID:SA1651~ferrochelatase homolog	SA1651	N315	1
CAAGTAATGCGATTACTAAAGTCATTACAAACAGATGAAAATAAGGCAATTATCCTAATTTCACATGATA	hypothetical protein, similar to ABC transporter (ATP-binding protein)	MW2140	MW2	1
CAAGTTATTTAGAATTTGGAAACTATGAATTACGTTTACCATTGGTTAGCCTAGAAGATACAGATACTAA	dihydrodipicolinate synthase	SA1227	N315	1
CAAGTTGAAGCTATTGCTGGAGAATTAAATATTTTCACTGTACCTGTGGATTTAATTTTTATGAATGGAA	ORFID:SA2324~hypothetical protein, similar to thioredoxin	SA2324	N315	1
CAATATAATATCGATACATTACATGTTACACATTCTGAACAACCTGGGATTTCTAACATGGAAATTCAAG	acetolactate synthase, small subunit, truncation	SA2044	COL	1
CAATCATATTAGTTGCAGATGGTGAAGATACAGCAAAAGATATGTATGCAAAGCAAGGTTATGTTTACCA	hypothetical protein	MW2199	MW2	1
CAATCCATTTATAGAAATTTCTAAAGCAGAAAATAAGATAGAAGATATCGGTCAAGGTGCAGAAATCATC	gamma-hemolysin chain II precursor	SA2207	N315	0	1
CAATGAAATTGAAACGTTATATATGATGTCTAGTACTAATTATTCATTTATAAGTTCAAGTATTGTTAAA	lipopolysaccharide core biosynthesis protein KdtB	SA1134	COL	1
CAATGATGTAAACACTACATATAGTGATTTTTATACATTCAACCCATATAAGCTACTATTTTCTCAAATA	ribonucleoside-diphosphate reductase 2, NrdH-redoxin, putative	SA0790.1	COL	0	1
CAATTAAAAAAGCATCAAACAGTAATATGCTGCTTGATGCAATATGGTATTGGTTAAAATGTATTGTCTC	hypothetical protein	SAR395a	MRSA252	0	1
CAATTACAAATGCATTATATAGAGTATTATTTGAAAATATCTCAGTAAAAGAATGCGTAAAAGATTTAAT	glycerol-3-phosphate dehydrogenase, NAD-dependent	SA1514	COL	1
CAATTACAACATGATGGTCATGAACTTATATTTGCATCAGCACACATTAATTGGCGCAAATGGTGCTATG	truncated conserved hypothetical protein	MW1264	MW2	0	1
CAATTCCAAATGATCATCGCCGTATCGACCTAGCTGTCACAAAAAACTTACCACGCTTTATTGATGTCTT	ribose permease	SA0259	N315	1
CAATTCTGCAACAAAAGGCTATAAATGATGTTGCGCCATTTTTCAATGTTAGTCCTGAGCAGTTAGCTAA	DNA primase	SA1391	N315	0	1
CAATTGACGGCGAAAAAGTATTAGATAATGTATCATTCACAATGAATCCAAATGATAAAGCGATTTTAAT	ABC transporter (ATP-binding protein) homolog~ORFID:SA1224	SA1224	N315	0	1
CAATTGTTGGTGTTGTGTATGCCTTGGTGTTTGGTTTAGATGCATCAACAATTAATCTTGGTAACGCTGA	ORFID:SA0368~hypothetical protein, similar to proton/sodium-glutamate sympo	SA0368	N315	1
CAATTGTTGGTGTTGTTTATGCCTTGGTGTTTGGTTTAGATGCATCAACAATTAACCTTGGTAACGCTGA	hypothetical protein, similar to proton/sodium-glutamate symport protein	MW0359	MW2	0	1
CAATTTTAAAGCTTCAAAACCCAAATAAAAAAGATGATATGACTATTTTGATTATAAAAAGAGTAAATTA	sigma factor B regulator protein	SA2057	COL	1
CAATTTTACCAGCAGCGGGTCTGTTATTAGCTATCGGTACAGCTATGCAAGGTGAATCATTACAACACTA	PTS enzyme II (EC 2.7.1.69), glucose-specific, factor IIA homologue	MW0163	MW2	1
CAATTTTTGATACATCTAGCTTGCGACATACTTCGAAAAAATTATCAACAATTTTAAAAGGGGATTTGTA	conserved hypothetical protein	SA1436	N315	1
CACAACTGAATTTGGTTTAGCACATAGTATGACAGCTAAAATAACTTTACATCAAGCGCTATACAAATAA	hypothetical protein	SA2372	COL	0	1
CACACGCAACATATACAACTATTTTATTAGTACCGTATGCGTATTTCTTATATGTACGTATTAAACAAGA	conserved hypothetical protein	SA0199	COL	1
CACACGCATATATGGCAATGGCAGCATACTGTGATAAAGAATCGTACGAAGGATTTGCAAACTTCTTCAT	ferritins family protein	SA1952	COL	1
CACATAACAAAACATTAGCAGGGCAATTATATAGTGAGTTTAAAGAATTTTTTCCTGAAAACAGGGTGGA	exinuclease ABC subunit B	SA0713	N315	1
CACATCATAACATGATGGTGGCTCATGCTAGAGCAGTAAAATTATTTAAAGATGGCGGATACAAAGGAGA	6-phospho-beta-galactosidase	SA2180	COL	0	1
CACATTTACTTTATCAATCATTTTTAAAATCAAAAGAGAAATATGATGAAGTAATGCGTTTCGGGAAATA	conserved hypothetical protein	SA0968	N315	1
CACCAGGTATAGTGAATATGGCTAGCGCCATTACATTCAGCTTTGCGTTAGTACTCATTTTATTTACAAA	ORFID:SA0293~hypothetical protein, similar to formate transporter NirC	SA0293	N315	1
CACCTAAAATTATTCATTTATTAGACCGTATGGGTGTAATGTTCAATAGAACAAATGAAGGTCTATTAGA	succinate dehydrogenase flavoprotein subunit	SA0995	N315	1
CACGAAAGAGAATCGAGGTGTATAAACATGTTATTTGTCATTTTAGTTTTATATGTTACTGGTATTGCAT	hypothetical protein	SA0490	COL	0	1
CACGTAACAGTTCGCTTTATGTGCACCCGCCACTATTTATGAATGACTTTTCATTGAAAGCCATTTTCGA	conserved hypothetical protein	SA2256	N315	1
CACGTGACGGACGTATCATCGAACAAATCGGTACTTATAACCCAACGAGCGCTAATGCTCCAGAAATTAA	ribosomal protein S16	SA1254	COL	1
CACGTTTAAATAAGTTTATTGAGGATATCGATCATGTAAATCCTGATGAAGTACGTGTTGAAGATATAGA	conserved hypothetical protein	SAS054	N315	1
CACTCGTATCCTTAAACAAGGCCCTCGTCGCGGTGACGGTGCTGAATCAGTAATTATCGAATTAGTATAA	ribosomal protein L17	SA2212	COL	1
CACTCTTTTTAGGATTAGTTGTCGCGCTTATATATATCTTCTTCAAAGTAATTTTTGATAAGCGAATTAA	capsular polysaccharide synthesis enzyme	SAR0151	MRSA252	0	0
CACTTTATGGTATATTTGCGACAATTTGTATTAAAGGGCGTAGAAAATTATCGATTATACTTTTTGTTAT	hypothetical protein	SA0955	N315	1
CACTTTTACACGAAGATTTAAAAATCCGTAAATTTATTGATAATGAATTAAAAGAAGCATCAGTTTCTCA	ribosomal protein S3	SA2233	COL	1
CAGAAAAACACGACGTGATTGCCGAGAATTACCTGCCCTCTAGTTATTTTAGATCTAGTGGTTATGATGG	hypothetical protein, similar to xylitol dehydrogenase	MW0228	MW2	0	1
CAGAAAATCGTCTGAAATACTCAGAATCCGAACGATATAAAAAGTATATTGGGTATTTTAGAGTAATGAA	hypothetical protein	SA2513	COL	0	1
CAGAAATCGCAATTTCTGACGAAAAAGCATTTGCTCAATTAGTAACTAAAGCTAAAGATGCTTTAAAATA	ribosomal protein L20	SA1725	COL	1
CAGAAGTTAAACGAGATAATGAAACATATCTAGTATTAAATGAAGAAGATATTTTAGCGGTAATTGAATA	GroES protein	SA1837	N315	1
CAGAATGAAGCAAGAAATCAAATTCGTCATATTGATAGAGATGTTATTATGGAAGAACTTGTTTCTTACT	conserved hypothetical protein	SA1445	N315	1
CAGAATGTTAGTCAGCTTTGCTGTAATAGCTGGTATTATTTATCTGATTTATTATTTCTTCATCTTAACT	hypothetical protein	MW1484	MW2	1
CAGACAGTGACTCAGATTCAGATAGCGATTCAGATTCAGATAGCGATTCAGATTCCGACAGTGATTCCGA	clumping factor A	SA0856	COL	0	1
CAGAGAAGTCACACATGGATGACTATATGCAACACCCTGGTAAAGTAATTAAACAAAATAATAAATATTA	cell surface protein	SA0977	N315	1
CAGATAATAATTGCATGATTTCAAATGCTGTAAGAAATAATGTAGACATAAAAATCTATCCCATCATTCA	conserved hypothetical protein	SA1543	N315	1
CAGATATCCCAACTAAATCAAGTATTATGGTTGGATTAGGTGAAACTATAGAAGAAATTTATGAAACGAT	lipoic acid synthetase	SA0785	N315	1
CAGATGAATTTTATTTTTTACCTAGTTTTATGTCTCCATTGAAAAAGCACAATAATTTTATAGATGTTCA	conserved hypothetical protein	SA1422	N315	1
CAGATGATACATTTAGCAATATTCAACTACCTTTTTACACTTTAAGTGATTACAATGAATTAATTGAAGT	orotate phosphoribosyltransferase	SA1217	COL	1
CAGATGATATTGAAATGCTACAAGACTTAGTGTTAGCAGCTACTAATGAAGCGATGAATAAAGCTGATGA	conserved hypothetical protein	MW0434	MW2	1
CAGATGATTATCATCAAAAGCATGGCTTAAATGAAGTGCGCTATAACAAATTACAAGAACATGCTATTGT	aspartate transcarbamoylase chain A	SA1043	N315	1
CAGATGCACAGGATAAGTTAGTTAAACATTACCAAAAACTAATTGAGTCATTGGCATATAAATATTCTAA	RNA polymerase sigma-37 factor	SA2054	COL	1
CAGATGGTAAAGGTCGTGTTGCATGGGATACGTATTTGGAAGAAAACTATTGGTACACTGCAGAACCAGC	6-phospho-beta-galactosidase	SA1991	N315	1
CAGATGTACCAATTCGACTTATTGGTGTCACTGTAGGTAATTTAGAACAATCAACTTATAAAAATATGAC	ORFID:SA1711~hypothetical protein, similar to DNA-damage inducible protein	SA1711	N315	1
CAGATGTCATGGGTGACGTGACAAATAACATTGGTGTTATTACATATGATAATGAAAATGCGGGTCTTTT	Xaa-His dipeptidase homolog	MW1694	MW2	1
CAGATTCAGATAAAATTGTTAAAGTTAAAAAAGTTGACCATGACGATGTACCACATGGTTTAATGATGAA	conserved hypothetical protein	SA2381	COL	0	1
CAGGCATTTACAAATACACATGCACCAGTTGAAGTATTAAAAGAAAAATTCGAACCTGTACTTAAAGAAC	conserved hypothetical protein	SA1581	N315	1
CAGGTACTGAAGAAAGTCCAGGTGCTACAGAAATTTTCCAAGGTAGACAATATAAAGTATACCGTGGTAT	inositol-monophosphate dehydrogenase	SA0375	N315	1
CAGGTATTCATGATGAAAATGAAGCCATTCAATCATTATTTACAGGTAATGTTACTGTAGTCATTTATAC	fructokinase, putative	SA2028	COL	1
CAGTACAATTCATAAAAATAATTTGCCAATGATATCTTTGAATAAAGATTTAGGTTATCAAGTGAGTCAT	hypothetical protein	SA0631	N315	1
CAGTCAAAAGAACAATTAAACATTAGAGAGATGACTAAAGAAGATGTGCCACAAGTCTTTGATATTGAGC	hypothetical protein, similar to ribosomal-protein-alanine N-acetyltransfer	MW1974	MW2	0	1
CAGTCAACTACTGCCAATATAACTTCGTAGAGCATAGAACATTGATTTATGTCCCAGCCTGGACACATTA	hypothetical protein	SAS089	N315	0	1
CAGTCCTAAAATAACCAATCCATTATTACATGAGTTTGGTACGAAAAAGTATCCAGATGAATATCGATAT	fmt protein	SA1066	COL	1
CAGTTAAATTAGCATTAGAAAAGCTCATTAAACCAGAATTAAATCATCTGATTCATGAGCTTACAAAATA	molybdenum cofactor biosynthesis protein B	SA2268	COL	1
CAGTTCGATAATTATGTCACAGGCAAATATAATATTTATGCATTTTATAATAATTGTGACATGAACTATT	conserved hypothetical protein	SA1235	N315	1
CAGTTTCATAGTCAATGTTTAAAGCAAAATCTTATTGATGGTACAAAAGTAGAAGCTAATGCCAATAGGT	IS1272-related, transposase, degenerate	SA2172	COL	0	1
CATAACAATTGACAATAACAATTCAATTTATAGAATAATATTCCATATTGAAAAAGGAAGAATTCGTTAT	ORFID:SA1371~hypothetical protein, similar to competence protein	SA1371	N315	1
CATAAGAATTACACCTCAAAGACAAGCAATATTACGTTATTTAATTTCTTCACATACTCATCCAACAGCT	ORFID:SA1678~transcription regulator Fur family homolog	SA1678	N315	1
CATAATATGATGGTTGCTCATGCAAGAGCAGTGAAATTATTCAAGGATGGCGGCTATCAAGGAGAAATTG	6-phospho-beta-galactosidase	MW2115	MW2	0	1
CATACAAAGGCCAAAAGTTGAAAGGAATTTCATTTGAAAATTCTAATGGTGAATGGGCTTATAAAGTGAC	conserved hypothetical protein	SA0359	N315	1
CATAGCACCAGTCATCAGTGGCTGTGCTGTTGCGTATTATACTTATTGGCTTAGTAAACGCAACAAATAA	putative membrane protein	SAR0716	MRSA252	0	1
CATAGGACAATTATTAGATAAAAAATTATTACAACAATATTTTGGTAAAGATCGATTTAGATTATTCAAT	ORFID:SA0417~hypothetical protein, similar to sodium-dependent transporter	SA0417	N315	1
CATAGTTTGTTTATTAATCCAATCACTCGAAAACTTCATACGTTCAATTTAGAGAAAAAACAAATAATGA	ORFID:SA0858~hypothetical protein, similar to transcription factor	SA0858	N315	1
CATATACGGACCTCAAATATTAATTCAAGAACTATCTAATCATTACAATCAGGTTGCTAGTCTCAATATC	hypothetical protein	SA2720	COL	0	1
CATATAGGTAAGTTTGAACTTGTATTTGTACCACACCTTACATTTATGTATATTTTAATGATGGTAGTGT	ORFID:SA1474~hypothetical protein, similar to cell shape determinant	SA1474	N315	1
CATATCCAACAGACAGAACAGAAGTTTATTTAAATGACTATGCTAAAATAATTATGAGTCATAACGTAAC	ORFID:SA0857~hypothetical protein, similar to negative regulator of	SA0857	N315	1
CATATTAAGTAAGTCAATTATTAAATTATTACCAGAAAAGATATCTAAACTAAGTAGTGGAGAAGTTATA	ORFID:SA0851~oligopeptide ABC transporter ATP-binding protein homologue	SA0851	N315	1
CATATTCATATGTATCAGTCATTGAATTGAGCAATTATTTAGCTGGTAAATCTGATGAAGATCCTTATGA	conserved hypothetical protein	SA0633	COL	1
CATATTTTTAAAAATTTAGAAACGAAAGTCTTAACGATGGGGTTCATAGATGATTTGCTATATCCGGACG	ORFID:SA0011~hypothetical protein, similar to homoserine-o-acetyltransferas	SA0011	N315	1
CATCAGGTACTGTAGATATTACCATTTCTGTTGAACAAAATCGTATCGCAGATTGTCGTATTTATGGGGA	ORFID:SA0316~hypothetical protein, similar to lipoate-protein ligase	SA0316	N315	1
CATCATGACAGACATCATAACACTTATGTTACGAAATTAAATGCTGCAGTAGAAGGTACAGATTTAGAAT	superoxide dismutase SodA	MW1505	MW2	1
CATCTGAGAATGGTCAACAAAAGCTAGCTGCTATTAATGTAAAAGCATATATTGGTGATATATTAAAAGC	ORFID:SA2231~hypothetical protein, similar to glucose epimerase	SA2231	N315	1
CATCTGTACCAGAAGATTTACAAGTCTTATTCAGCACAATTAAGCGTGTCATGCGTCTAATTGATAATAT	2-oxoglutarate dehydrogenase E1	SA1245	N315	0	1
CATGAAAAAATATATCAAAACAGCATTTTTTTGTAGTATGTATTGGTTAATTGTTCAACTAAATATAGCA	hypothetical protein	SA2352	N315	1
CATGAAAATGATTTAAAGCCAGATGAAGTTGCATCAAATACATCAGACAATAATCAACAATCCAATGATT	conserved hypothetical protein	SAR1168	MRSA252	0	1
CATGAAACATTAATCAAAGCATCTAACCACCAATATTTAAACTCATTTTGGAGTCATTTAAAACCAGTAA	gluconate operon transcriptional repressor	SA2295	N315	1
CATGATTCACAACTAGAAATTAATAACGAAGAAGAATTATTAACTTTATTCGATGAAGAGGGAAATGAAG	conserved hypothetical protein	SA1670	COL	1
CATGATTTCCAAACTAAGTTGAAAAACGGACGTAAATTCTTAACTAAAGGCGATAAATGTAAAGTATCTA	translation initiation factor IF-3 infC	SA1504	N315	1
CATGTGCCAAGACCACCAGCGATGGTTGAAACATTGACTTATATTAAAGAGTTTATGAAACAAGTTGAGT	conserved hypothetical protein	SA1611	N315	1
CATTAAATCACCAATGGTAGGTACATTCTTTTTACAAGATAGTAAAGAATTAACTGAACCAATTGTGAAT	ORFID:SA1435~hypothetical protein, similar to acetyl-CoA carboxylase (bioti	SA1435	N315	1
CATTAATATGACACCTTTTTTCAAACATTCCGAACCACATGACTCTGCAACTACTATTCGATTATCAAAT	conserved hypothetical protein	MW0994	MW2	1
CATTAATGATGACACCAAAATTTGATATTAACCTTTTTCTCAATTATTCACTTTTACAATTCATCATTGG	hypothetical protein	SA1602	N315	1
CATTAATTGATGCTGATTTTATTGGTAAATCTGTATTAAAAGATCAAAAAGAAAATGGTGCACCAAGAAG	glycine cleavage system T protein	SA1595	COL	1
CATTACAATTACCTTTAATATTGAAAATTATTTTGAATCTTGCACTTATAGGTATTGTAATTATCGTTCT	hypothetical protein	SA2401	N315	0	1
CATTACATTTAATGTTAAGTTTCGGTATGTTTATCGTCACTTTCATTGGTGTAGTAGTCGCAATAATTAA	hypothetical protein	SAR1000	MRSA252	1
CATTACCTATATTAACTGGTATCAAAATCGATGCGAAAGAACATGAAGTTATACTAACTGGTTCAGACTC	DNA polymerase III, beta chain	SA0002	N315	1
CATTACTATTTGGTACTTTTTTATATTTTATTGCTACTCAAGGTTTTGTAAATATGCAATTAATCGTTGC	Na1/H1 antiporter subunit	SA0807	N315	1
CATTACTTTGTTTCTACATGGATAATCCCCTTATTATTAATAAATATTCTATATTTTATTATGACGATTG	hypothetical protein	SA0844	N315	1
CATTAGAAACAGAATTAACTACAAAAGAAATTTTATTTAAATATGTACTGAACAATAAATGGGTATGGGC	glycerol-3-phosphate transporter	SA0407	COL	1
CATTATATGAAATTCCATATTTTGTAAAATATTTAGCTGATTCTTATACGAATGGAAAGGTAATTATGTT	acetoin utilization protein AcuC	SA1785	COL	1
CATTCGTCGTAGAAAGCTTAAAGATTATGAACCAGAAGAACTGGAAAGTGTAGTAGAACATGAAATTCAA	conserved hypothetical protein	SA1973	COL	1
CATTCTTCTTAGAATTTATGGCCAAAGATGTTTCAAAAGGTAATGCAATTAAAGCGTTATGTCACAAATT	conserved hypothetical protein	SA1167	N315	1
CATTGAAAAACGCTGAACTACTTTATAAATTTGCCAATGGTATATTTAGTGATGAAAATTATGAAGAATA	putative DNA-binding protein	SAR1148	MRSA252	0	1
CATTGGTTGAAATAGTTAAGTATAAGAAATTGGATATATTGTTGATTGCGGGAGATATCTCAAATCATTA	conserved hypothetical protein	SA2225	N315	1
CATTGTATAATTGAAATAACAATATTTTGCTATTTTCAATTTAGTACGATTTATATTTATTATACAGAGG	conserved hypothetical protein	SA0497	COL	0	1
CATTGTCTGTAGAAATTGGGAATCCAATTTCTCTTTGTTGGGGCCCATCCCCAACTTGCACATTATTGTA	hypothetical protein	SAS1375a	MSSA476	0	1
CATTGTGATTATCGTTTTAACACATACTGAGTTTCAACTTAATGCCGGTGATAGTAATGTTTTTTTATTA	putative membrane protein	SAR2686	MRSA252	0	1
CATTGTTAAACAAAAGTTTGTTATATAGTGGTATTATTTTGCATGATATTGGTAAAGTTAGAGAATTGAG	cmp-binding-factor 1	SA1898	COL	1
CATTTAATGAGCAGAATAAGAAGATACCCATTGCCTTTAGTACTTGAAATATCAAATATCGAAAGTGTAA	conserved hypothetical protein	SA1722	N315	1
CATTTACAGTGGAATTTTTTATAGATAGTAACAACCAATTGTATGTGAACGAGATTGCACCAAGGCCTCA	ORFID:SA0917~phosphoribosylaminoimidazole carboxylase carbon dioxide-fixati	SA0917	N315	1
CATTTAGCGATTTTAAGTGTGCTATATGAACTTAATATTGAAATTCCAAAAGATGTAATGACAGCAACAT	maltose operon transcriptional repressor	MW1462	MW2	1
CATTTATACTAATTTAAGTTTGGTGTTTCACTATAATGTTGTGTATAATAAACAACGTTTACTACCAAAC	hypothetical protein	SA1488	COL	0	1
CATTTATCGGGTGCAGAAGTCGCAGAACTTATACAAGCAAATGTTAAAACAGTATTTAAAACGCTTGTTC	ORFID:SA0652~hypothetical protein, similar to transcription regulation prot	SA0652	N315	0	1
CATTTGAGTTTGATTCACAAGATGACTTTGTGAGAATAATTGAACAATTAAATCGTAGGTATGGTAAATA	ORFID:SA0348~hypothetical protein, similar to transcription terminator	SA0348	N315	0	1
CATTTGATGTAACTGAAACTAAAGGTAACTATGATGTTTTAGTTAACGTTCATGGTGGTGGTTTCACTGG	ribosomal protein S9	SA2206	COL	1
CATTTTAATAGTCTAATGAATGAAATTCAAAATAATGTTAAAACAGATTTAACATTAGGTGATTTGAATA	transcriptional regulator, putative	SA2302	COL	1
CATTTTATAAAGTTGAAGGCTTTTTTTATTCTCATATTGATAATGCTTTAAATTTGGTTGATGCATATAC	xpaC protein, putative	SA1440	COL	1
CATTTTGTATATATTGTAAAATGTAGTGATGGAAGTTTATATACAGGATACGCTAAAGACGTTAATGCAC	conserved hypothetical protein	SA0530	COL	1
CATTTTTACAAGTAGCAAAAACAGCGGTGGATAATTTTAAAGCATCTGATAAATTATTAATCACTTCTAC	conserved hypothetical protein	MW2429	MW2	0	1
CATTTTTTAGCAGAACTTGCTAATAAATATGATGTTCAATATTTACTACAAAGTCGTGTTTTAAACACAA	hypothetical protein	SAV2380	Mu50	1
CCAAAAGATAGCCAATTATCATATTTAGATTTAGGAAATAAAGTTAAAGCTTTATTATATGATGAACGTG	ORFID:SA0841~hypothetical protein, similar to cell surface protein	SA0841	N315	1
CCAAAATTGTACATGTAGATATTGATCCTTCAGAAATCAATAAAGTTATTCATGTAGATTTAGGTATTAT	acetolactate synthase, large subunit, biosynthetic type	SA2043	COL	1
CCAACAGATGTAGAAGTTCTAGATGAACAAAAAGGTAAAGATAAACAATTAACATTAATTACTTGTGATG	sortase	SA2316	N315	1
CCAACATAGTGAAATTGGCTCCTCCCAATTTCTACAGGCAATGCAAGTTGGGGTGGGGCCCCAACATAGA	hypothetical protein	SA0836	COL	0	1
CCAATACATAAAGTCAGAACATATTGAAGATACTTATTTACTTATGGATTCATTTATTTCAAAATATGAT	probable cytosol aminopeptidase	SA0803	N315	1
CCAATATATTAATCGTAAACGCTATAATCCCGTTAAAGTACTTAATGAAGTAAAATCATATTTTATGAAT	hypothetical protein	MW1689	MW2	1
CCACATGCACAAGAAGTTGTGAAAAAATTAACTGAACATTATGATGTATATATTGCTACAGCAGCAATGG	conserved hypothetical protein	SA0680	N315	1
CCACTCACATGATTTTTTTGATGAAACATAATTACATGATTGATTGCATCATTTTGTTAAACAATTTATT	hypothetical protein	SA0101	N315	0	1
CCAGGTGACATCAATCAAATGGTTGAAAAGGTTGACCAATTATTAAATAATAGCCAAATGATGCAACAAT	putative glycosyl transferase	SAR0568	MRSA252	0	1
CCAGGTGGTAAAATAGAAGAAGGAGAATCACAAGTACACGCGCTGTTAAGAGAAGTAAAAGAAGAATTAA	conserved hypothetical protein	SA0425	N315	1
CCAGGTGTATCGATTGCGACAGGAAGCACGATTTCTTATGCACCAGGTATTTACTTAGTTAAATTGTTAC	probable PTS galactitol-specific enzyme IIC component	SA0238	N315	1
CCAGTGCATTAGACGTTAATAATAAAGAAAAGATAGAAAATATCATTTTTAAATTAGCAGATCAAGGCGT	ABC transporter, ATP-binding protein	SA2462	COL	0	0
CCATATGAAATGGGACTAGTTAAAAATCAATATGTTGCAAGAACATTTATTCAACCAACTCAAGAATTAC	amidophosphoribosyltransferase	SA1079	COL	1
CCATGAGAAAGGTAAGTTAATTGGTATGTTGCAAATGTTTATGACAAAAGAGAGCATTGCAGATCGCATT	conserved hypothetical protein	SA1664	N315	1
CCATTAAAGCTTTATTTGAAGCATGGGCATTGTAAAGTATTACTTGGTGTCGCACGAGGTAAGAAAAAAT	ssrA-binding protein	MW0743	MW2	1
CCATTTGTTAACAATAAACGATATAGTTCCAAATAAATATGACAAATTAAAAGAAGATATTGATCAATTT	DNA repair protein	SA1350	N315	1
CCCAACGATTGTTAGAGATTTTCAGAGTGTCATTGGTAAAGAAATAAAATCACAGATATTGAAGAAAGAA	tryptophan synthase beta chain	SA1204	N315	1
CCCATCAAAATTCGAAGATGCAGAGGATATAGCTAAAGAAAGTTTAAAGCTTTACATTAATGCATATCGT	conserved hypothetical protein	SA1306	COL	1
CCCATCTTTTAACACAGCGGGAAGGCTTACCAGCTAAACAAGAGGTCATTGAAAATTACCAAAAAAATCA	conserved hypothetical protein	SA2370	N315	1
CCCATGTCAGCAATTGTTGGACGCAAAGAGATTATGAATTGTTTAGAAGCACCAGCACATTTATTTACAA	ORFID:SA2397~hypothetical protein, similar to pyridoxal-phosphate dependent	SA2397	N315	1
CCCTAAAAATGCAGATTATATTAACTTAGAAAAAGAGTTGACTAAATCAAATGAGTCGAAAAATAAATAA	conserved hypothetical protein	MW1501	MW2	1
CCGAAGATTGTATACAGTCATTTGAGCATAAAGAAAGACCGCATTACGGTATTCAGTACCATCCTGAATC	anthranilate synthase component II	SA1200	N315	1
CCGAAGCGATAGTGTCACATGAAGACTTAATTGAAGAATTATTAGGTATGGAAATTGAAGATGAGATGGA	ORFID:SA0780~hypothetical protein, similar to hemolysin	SA0780	N315	0	1
CCGCTATACGCACTAAAAATTTGGATCAAATGACTAAAGCGAAACATAGATTAGAAAGTATTTACGATTC	hypothetical protein	MW0205	MW2	1
CCGGACAAGCAGCAGACTTGTATCGCTCTGGATATAATGCTGCGAAAGGTGCAGTGATTAATTTTACAAA	3-oxoacyl-(acyl carrier protein) reductase, authentic point mutation	SA2482	COL	0	1
CCGGATGTAGATATTTATATTGCTGCACTTGATGAAAAGCTAAATGATAAAGCATATATCACACCAGGGT	uracil phosphoribosyl transferase	SA1914	N315	1
CCGGGTTTTGGCAAAGGTGTTATCAAGAGGGAGTAATTGCGGATTTACAGTTAAAAAATAATGGTGATTT	ORFID:SA2223~hypothetical protein, similar to transcriptional activator	SA2223	N315	1
CCGTGAAGGTGGTATTCGCGGCATTGTAATTAGTTTATTATCACTAGATCATATCGATGTATCTGATGAT	ORFID:SA0693~hypothetical protein, similar to UDP-N-acetylenolpyruvoylgluco	SA0693	N315	1
CCTAACAACTAAAAGTTGTAAGGTAAAAGAGGGATACATGCACCGAGCGCAAGCAAAAAAGCCCCTAACA	hypothetical protein	SA0930	N315	0	1
CCTAATGTCATTCCAAATTGCTGTATATTCATTCATTGGTATTGAACTTATAGGTGTAACTGCTGGTGAA	amino acid ABC transporter homolog	SAV2438	Mu50	1
CCTACTGAAGATACAACGATGTTTGATCAAGTAGCAGAAGTTATTGAACGTCTTCGTCCATTTTTATTAC	hypothetical protein, similar to nitrogen fixation protein NifU	MW0818	MW2	1
CCTAGCGTTTCTATTAATCGCGATATTATTCTTAACGTTAGGTTTTTGGAAAACAGTACTTATCATCGTT	conserved hypothetical protein	SA2174	COL	1
CCTAGGCATGATTCTATTAGGAATCGTTGCTTTCTATGAAGAAAAGAAAATTAGAAGTTTAAAAATTTAA	phosphoglycerate transporter family protein	SA0200	COL	1
CCTATGCATACAATAAGTTTAGTGAAACAGAATTACCATTAGCATTATCATTTTTTAGTGGTAAACGTCT	PTS system, N-acetylglucosamine-specific IIABC component	SA1547	N315	1
CCTATTTATATAACAACAGATAGTGATTACAATATTTCGGTTATTAACACGAAAATTTTACAAGCGCCTA	ORFID:SA0836~hypothetical protein, similar to transcription regulator LysR	SA0836	N315	1
CCTGAAAGAAAAGCACATTATTGTTGTACGCATGGCGGTAAAAAATTGACAAATATTAAAGTATATGACT	HisF cyclase-like protein	SAR2755	MRSA252	1
CCTTAATGATAGATATGGTTTTAAACGTGACTTCAAACTATATGAATGCGATGACTATTCAGCATGTTCT	putative transposase	SAR0932	MRSA252	0	1
CCTTACCGCTTATACTAGGCGGTATTCGCTTGTCGTCTGTGTATGTAATTAGTTGGGCTACACTTGCAAG	putative glycine betaine/carnitine/choline transport system permease protei	SAR2537	MRSA252	0	1
CCTTATTAAATTTCCGTATGAATAACAGAAATCATAGAAAAATCATCGTAATCGATGGTCAACTAGGTTA	ORFID:SA1155~cardiolipin synthetase homolog	SA1155	N315	0	1
CCTTGAAAATGAAAAAACGCAGATCAATGATTCAGAAAATGAATCTAGTGATCTCCGTAAAGCAAAATAA	hypothetical protein	SA1953	COL	0	1
CGAAATTTAAATAGCCCTAACATTAAAACAAGAAAGCGTGCTTTAAAGATTATTAAGCAACACAAAAGAG	hypothetical protein	MW2338	MW2	0	1
CGAAATTTCATTAGAAACACCTATTGATATTGAGGTTATACCAAATGCTATTCAGTTACTTACTGTCAAT	ORFID:SA0681~hypothetical protein, similar to multidrug resistance protein	SA0681	N315	1
CGAACACCTATATCATTACTACAAGGTTATACTGAATCAATTGTAGATGGTATTGTTACAGAACCGGATG	staphylococcal respiratory response protein SrrB	SA1322	N315	1
CGACCGTTGGCATAAGGGAATTTGTAAACAAATCGTTTTGAATTTAGTAGAGAAAGGTGAAAAGGGTTAA	hypothetical protein	MW0360	MW2	0	1
CGACTTTACAAATACAGAATAGTCTTGAGCACGTACTTAAAATTGCCAAAGTTTTTAATAAAAAGATTAA	ribonuclease P protein component	SA2739	COL	1
CGATCTTATAGATACATATTCTTTGAAACATTATCGTAAATATATTTATTTTGCTTGCTTTGTGCTGGCG	putative Sec-independent protein translocase protein	SAR0343	MRSA252	0	1
CGATGACAATAAACATTTTAGAAAAAGTAGGTATAAAACATGCAACTCGACAATTTGATGCTTATCCACA	oligopeptide transport ATP-binding protein	SA0198	N315	1
CGATGGATAAAGTAGATGATCAACTTAAGTTGTTACAACAGTTGATGCAAATTTTTCAAAGTGAAGAAAA	ORFID:SA0236~hypothetical protein, similar to PTS fructose-specific enzyme	SA0236	N315	1
CGATTATATATCAAATTATCAACTACTGAGAGAGCACCCTATCCATACAGATTAGAAGAGACAGATGATA	ORFID:SA1337~transcription regulator AraC/XylS family homolog	SA1337	N315	1
CGATTTAGTATTCTTATTTGAAAATGAATTTGCAACAAGATGGTTTGAAGAGAAATTCCTTGAAATTAAA	peptide chain release factor 3	SAV1021	Mu50	1
CGATTTCAAAAGAAAATATTAGTAAATATGCTGGTGATTATATATTTTTAAGTAAGCCTTCATACGGGAA	hypothetical protein	SAV0803	Mu50	0	0
CGATTTGGATTAAAGAAGATGATTCATTCCCAAAACAAGAGAAGCTAACAGAAAACATTTTGTCTTATTT	conserved hypothetical protein	SA2626	COL	1
CGATTTGTTGTTAAATTCATTCTGTTTTTCACAATATTAAATATTATTGCCGTATACATATTTGACCCTG	conserved hypothetical protein	SA2475	N315	1
CGCAACGATCAAATATGACGGCGCATATTGCATTAATGGCTATAGATGGATTACTTATATTGCTAATAGT	truncated amidase	SA1756	N315	0	1
CGCAGAAGGCATAGAACTTGCAACTACATTGATTGATAATGGTGAAGCATTGAAAAAATACCATCAAATG	anthranilate phosphoribosyltransferase	SA1201	N315	0	1
CGCCAATAGCAACTATGATTATCTTGGTAATCTTTTCTTTAGCTTTTTATCCTGCATATAATCCTAAACC	ORFID:SA2164~hypothetical protein, similar to phage infection protein	SA2164	N315	1
CGCCAATTCATTAAAAGAATTGTTAAAACAATCCTTGTCGGTTATGTAATTAAATTTATTCGAAATAAAC	hypothetical protein	MW0922	MW2	0	1
CGCCAGATATTTCATATGAGATTTCTGCAAATGATTTCTTTAGATCATTAATGGAAGACACGACCATCAA	menaquinone biosynthesis protein	SA0896	N315	1
CGCCTAGGGGATGTCTTAGTTCTTGATAATATTTTAGATAAAGCTGAATTACAACAAAAGCTCTCAGAAA	conserved hypothetical protein	SA0319	N315	1
CGCCTATTTATATCACTCAAATGCTAGAAGCGTTACTGGAACTATACAGAAAGTTAATGGTGCTTGGTAT	ORFID:SA1123~hypothetical protein, similar to 3-oxoacyl- acyl-carrier prote	SA1123	N315	1
CGCGTTTTATAAATTATAGTGAGGCAGAGGTTAATGATGGGTTAGCCGGATTTAATCCAGTGTTAACTGC	ORFID:SA2081~hypothetical protein, similar to urea transporter	SA2081	N315	1
CGCTATTCGAACCATTAACTAAAATTGAAACATATGAAAATATTGCAACTAAAATCGCTATGATTGTTAT	conserved hypothetical protein	SA0349	N315	0	1
CGCTCAATTGTTAAATTAAACGAGGCGAAAGTTGTCAAAAAGATAGAGCGTTGGCAAAAAATAATTAAAG	conserved hypothetical protein	SA1406	N315	1
CGCTCATACTTACAAAATATTGTTGAAACGAAAATGAACACGTTCTTTGCAAGTATTGTTGTTGGTTTGA	hypothetical protein	MW2255	MW2	1
CGCTGTCGAGTTATTGAAAAACAGGGTCAACGTTTAGTTACCGATGGAGACTTCACTTTGACCAAAAAAG	kDa Myosin-crossreactive streptococcal antigen homologue ORFID:MW0081	MW0081	MW2	0	1
CGGACAGCGACTCAGATTCAGACAGAGACTCAGACTCAGATAGTGATTCAGACTCGGATAGCGATTCAGA	sdrD protein	SA0609	COL	0	1
CGGATTATATTGCAGTACACACTGGTTATGATTTACAAGCAGAAGGGCAATCACCATTAGAAAGTTTAAG	hypothetical protein, similar to hexulose-6-phosphate synthase	MW0525	MW2	1
CGGTAGAAGATGTTCATAAACTTTGTGAGGATCCTCAGTACATGTCACATGTAAAACATATCGGTAAGTT	mevalonate kinase	SA0547	N315	1
CGGTGGAACAAAAGAAATGTATGTACATACCTATGAAGAACTTGTAAGTTTAATTTTAAAATTAAAAGAT	phosphotyrosine protein phosphatase	SA2107	COL	1
CGGTTAATGATGAACTTAGTGCATTGATTAAGTTATTAATTTCAAAAATTAACGGTTGTCATTATTGTGT	conserved hypothetical protein	SA2262	N315	1
CGGTTATTTATGAAGAACTCACATTAGAGGAACATATAGAGATGACAGCAATGGCATATGATATTGATCG	ABC transporter ecsA homolog~ORFID:SA1655	SA1655	N315	1
CGGTTGCATCACAATTTAATCTGGATTATCAAATTATTGAGACTAGTAATGAAAGAGAAGTTATTTTAAA	maltose operon transcriptional repressor	SA1339	N315	0	1
CGTAACCCCTGGGAAGGATTAGAAGCGGATACGTTTGAAGATGTCGCAAAATGGTTACGTGACGTTCGCG	conserved hypothetical protein	SA0412	N315	1
CGTATGAGACACCAGCAAATTTGAATAGTATTGAAAAAGAAATCTATGATGAAGGATACAAAATTGTAAT	hypothetical protein	MW2009	MW2	1
CGTATTTATTATTCAACCAACATCATATCCTGTGAATCTACATTTAATGGAATTATTAATTATGATTGAT	ribose-phosphate pyrophosphokinase	SA0544	COL	1
CGTCAAAGGCATTGATGATGTTATTTCAAGAGATTCATCAATTGGAACAGACAATTTTAATGGTAACTCA	ORFID:SA2416~hypothetical protein, similar to ABC transporter (ATP-binding	SA2416	N315	1
CGTGTTTTTTGTTATTGTATTTATATGAAGAAAAGGAGGCACCACTTTGTTTACTTACTTTAAATCAGCA	hypothetical protein	SA2139	COL	0	1
CGTTAAATTCCATGATGGTACACCATTTGATGCTGACGCAGTTAAGAAAAATATTGATGCGGTTCAACAA	oligopeptide transporter putative substrate binding domain	MW2391	MW2	1
CGTTACAACTTAGCGCCTGATGAATTAGAAAAATATAAACAACTTATTTTAGACGATAAAATGTTAGTTG	hypothetical protein	MW0363	MW2	1
CGTTGCATAAATATATTAAAAAGATATTTATATCTGAGGAAACAGGATATCAAAAACCTAATCCGGAATT	conserved hypothetical protein	SA1018	N315	1
CGTTTTGATTGTGTACCATCACAATTAAATTATGTAATCAAAACACGATTCACTAATGAACATGGTTATG	ORFID:SA0480~transcription repressor of class III stress genes	SA0480	N315	1
CTAAACTTGAAGGTAAAAGTCATATTGCAAGGTGCACAAGTTAAAGCGACTGATTTAAGAGCAGCAGCAG	UDP-N-acetylglucosamine 1-carboxyvinyltransferase	SAV2099	Mu50	1
CTAAAGAGCAATTGGATCCTGTTTACAAAGAAATTATTAGATTAATTTATAGAGAAGAGATTCCAAAATG	conserved hypotehtical protein	SA1110	N315	1
CTAAAGAGTAAAGAGATTATAGATGAGTTAAAAAGCATGAATATAGAGGTTTCAAATCATATGCAAGCTT	translation initiation factor IF-2	SA1112	N315	1
CTAAAGATACTGTCTACCATAAGAAAGCTTTGAAAATGTCTATGATTGTTGGATTCTTTTCAACTTTACT	ORFID:SA0937~cytochrome D ubiquinol oxidase subunit 1 homolog	SA0937	N315	1
CTAAAGCGTTTCATGGTCGTTACTTATTGACAGGAGATTTAGCGAAGATGGACGACGATGGCGATATATT	putative acyl-CoA synthetase	SAR0226	MRSA252	0	1
CTAAATATAACATTCATTATTTAAGTGACGACGAATTATTAAAAAAGATATCAAAGGAAGTTATTTTGTA	truncated hypothetical protein	MW0913	MW2	1
CTAAATTAATTACAGATAAATGTAAGAGTTACAAAGTTCCATTCAGAAAGTTTGGAAATCGAAATGAATT	30S ribosomal protein L7 Ae	SA1287	COL	1
CTAAATTATTTACCTAGTCTTAAATTTGATTATGCTCAAAATGAAGCGGCACGACTTGAAGAAATTATGT	DNA repair and genetic recombination protein	SA0004	N315	1
CTAACCAAAAATAAATACGATGATAATTACTCATTAACAACTTTAATCCAAAACTTATTCAATTTAAATT	N-acetylmuramoyl-L-alanine amidase domain protein	SA2666	COL	1
CTAAGAAACCGTTGGTACTCATCATGGATAAGCAATCTGATATCGTTCAACATGTTGAACAATATGATGC	capsular polysaccharide synthesis enzyme Cap5L	SA0155	N315	0	1
CTAAGAAAGATGATACTGATTTGAAGTTAGTTAGTCATAACGTTTATATGTTATCGACCGTTTTGTATCC	phospholipase C	SA2003	COL	0	1
CTAAGGTTAATAGATTAATTGAAAGACGATTATTACGTCATTTCAGTAAAAAAGGTTATATCACATGGGA	conserved hypothetical protein	SA1426	N315	1
CTAATCATGAAAGCCAAGGTATAAAATTATTATTAGCAGCGATTATGTTTATGATTTGTGCTTTTATAAG	conserved hypothetical protein	SA1998	COL	0	1
CTAATTATAATTTATGTAGTTTACCAAACAATGATCTTTGTATCGATAAAATATTTGAATATAAAAAGAG	conserved hypothetical protein	SA0838	N315	1
CTACATCAAGTCGCATCGTGGTACCAGCACATCAAAGTAACATGGCATCAACGCCAAACCTGTCTATAAC	hypothetical protein	SA2081	COL	0	1
CTACATTTTATGAGGAAGACAAACATTTAATCTTTGGTTATACACCAACGTGTGGTACTTGTAAGGTTTC	thioredoxin, putative	SA0881	COL	0	1
CTACGTTGAAAAAGTTAATATTGATGGAAGTATTCTAATTTCAGAAATGAACTGGATTGGTGAATATATC	staphyloxanthin biosynthesis protein, putative	SA0270	COL	1
CTACTACAATGGCTACAATAACTACAACAATTACAACAATGGTTATAGCTACAATAATTACAGCCGTTAC	ORFID:SA2093~secretory antigen precursor SsaA homolog	SA2093	N315	0	1
CTACTGCCAATATAACTTCGTAGAGCATAGAACATTGATTTCTTTCCTAGCCTGTTTATCATTTATGTCT	hypothetical protein	SAR1680	MRSA252	0	1
CTACTGGATTATCAATTTGTTGAAAAAATTAAAGATGGACGGGAAGATGAAATTATTAATTACTTTGATC	NADH-dependent flavin oxidoreductase, Oye family	SA0959	COL	1
CTAGAAAGTTTAAAAGTGACATTTTTAACACTCAAAATTGGAAATATGACGAACTTAATGATGAATTTAT	IS1272-related, transposase, degenerate	SA2355	COL	0	1
CTAGACGAACTAACAACAGGGTTACATGTTGACGATATTAGCAGATTATTAAAAGTATTAAATCGATTAG	exinuclease ABC subunit A	SA0714	N315	0	1
CTAGATTTATTCATAATAAAATTGCAATGTTATCGATTATTTTTTTATTAATCATAACTATTGTATCAAT	Hypothetical protein, similar to oligopeptide transport system	SA0854	N315	1
CTAGCAATATCTGAAGTTGTTAAACTTAACTTTACCGGTCTTCCTATACTACTTGCAGTCGGATTTGGGG	conserved hypothetical protein	SA0773	N315	1
CTAGTAACGATAAATTTAATGCATCTGAATTCTTAACTTCATTTGATGCATTACATCAATTATTTATCGT	isoleucyl-tRNA synthetase	SA1206	COL	1
CTAGTGTTAACTATGTAAAAAAGCGTTTAATTCAGAACATTCAGCGTATTTTAAGTAAGGAAGGACTATA	hypothetical protein	SA2417	COL	0	1
CTATAAAGATTTTGAATGAATATGATGGTATTAGCGTATCTAATATTTCTCCGATTTATGAAACAGCACC	2-amino-4-hydroxy-6-hydroxymethyldihydropteridin e pyrophosphokinase	SA0474	N315	1
CTATAGTTTCTTTATTTTTAAAAGAATGTGCTGAATATGACATTGATTTTAAAAAATTAGTACATAGACG	hypothetical protein	SA1590	N315	1
CTATCAATTACTATATAAATTTAGTACCCTTTTGCCACTTAATTATAACAAATTCTCAAATTTTAAAAAT	hypothetical protein	SA1755	COL	0	1
CTATGTATTCTTACAATGAAGATGGAACTGAACATTATTACGAATTCCATACTAAAAAAGGTATGTTATT	hypothetical protein	SA0570	N315	1
CTATTAGGGCCTCAATATTTGATTGATAAATTAACATTTATGCACGCCTATAATTGTATTTGTGCCAATG	HisC homolog~ORFID:SA0902	SA0902	N315	1
CTATTATATTACTGTTTTAGAAGATGCTGTTGGTGATAGATCAGATGATAAACATGACTTTATTATTGAA	isochorismatase family protein	SA2667	COL	1
CTATTCAACAGTAAAATATTATTATTGTTATCTTTTATTTTACAGCAATCATTTTTATATTACTTTACGA	intercellular adhesion protein C, authentic frameshift	SA2692	COL	0	1
CTATTCCTGAACATAGTTTTTTAAGAAATGCTAAAACAGGCAGCTTACTAGACGATGCGCCATTAATTAA	ORFID:SA2261~hypothetical protein, similar to efflux pump	SA2261	N315	1
CTATTCCTGCATTATTACCTTTATATAAAGCGTTAAATATGAATAAATATTTATTGATTTTACTATTAGC	citrate transporter, permease protein	SA2636	COL	1
CTATTGACGCTGAGACAACTGGTGGCAATACAAAAGTCAGCGTTCTTCAAACAGATGCTGCTATTAACCC	hypothetical protein, similar to serine proteinase Do, heat-shock protein h	MW1670	MW2	0	1
CTATTTTATTAACGATTACGGTCATATTTGCTATTAGTTCATATACAGGATTGAAAAAAGGTATTCAAAA	choline transporter	SA2408	N315	1
CTCAAATAAGCAAAATATAATCGATCAAGCAGAAACAATCATATTACCGGGTGTCGGTCATTTTAAAGAT	putative amidotransferase	SAR2757	MRSA252	0	1
CTCAAATTGAGCATACGGTTATCGTGACTAAGGATGGTCCGATTTTAACGACAAAAATTGAAGAAGAATA	methionyl aminopeptidase map	SA1704	N315	1
CTCCAAATGAATTTAGCTTGTTAGAACTATTGTCAAATCATAAAGGAAAAGTACTCACTTATGAGATGAT	KDP operon transcriptional regulatory protein KdpE	MW2003	MW2	1
CTCCTTTAAAGTAACTAAAATTGCTCAATATCTAGCAACAGTTGAAGAATATCATGGTCGAAAGATTAAT	conserved hypothetical protein	SA0711	N315	1
CTCGTCCAATAGGTTGGATTTCTACTGTATCGAAAGATGGGAAAGATAATTTAGCGCCTTATAGTCAGTA	conserved hypothetical protein	SA2448	N315	1
CTCGTTTAATTTTGCAAGTTATATGTCAGCTAGTAAATTTTTCAAAGATTACGCTTTGAAAACAAATGAT	ribonuceloside diphosphate reductase major subunit	SA0686	N315	1
CTCTAAACAAATACTTTTGATTATGGGCATTATATCTCTTATTGTTTTATTTATTTTTACACTATTCATC	hypothetical protein	SA2502	COL	1
CTCTATTATGGAAGAAGGGAATATTAAACGTGCTGTTATGGGTGAAAAGATAGGTACGTTAATTACAAAA	uridylate kinase	SA1101	N315	1
CTCTGTAAGCTATTACTTTAAAAATAGTTTTTATATCACACCAAGTGGCATGTTAACGAAGCCACAGTTT	conserved hypothetical protein	SA2366	N315	1
CTCTGTTATTGTTGACTTAACAATTATGGAAAATTTTAATGACCTTGATTTACCGGAAAAAACTGTTATC	conserved domain protein	SA1035	COL	1
CTCTTTAGAATTAGGAGATTATTTTAAAGAACAATTAAAGCAAATTGATCATCCATCAATTAAAGAAGTC	ornithine aminotransferase	SA0960	COL	1
CTCTTTTTTTATGTCTAAAACGTCAAAATAAAAGCAAACACAAAGAAAGATGGCTTGGCGAAGTGAAAAC	hypothetical protein	SA2051	COL	0	1
CTGAAATCGTGATAGGTTGTCAATCTTATTGTGGACCTGGACGCCGAAAAACATTCACTTTTGTTAATAA	conserved hypothetical protein	SA0639	COL	1
CTGAATATTACTGGCATTGGGATTTAAAAAATTCAAAGTTAGATGTATTTGACTATAAAAAATTAATGCA	ORFID:SA1555~acetoin dehydrogenase homolog	SA1555	N315	1
CTGAATGCGCAAGAAGCACAAACAGGATATGTCAATTTAAATAATTATGATGAATTATTCAATCAAATTG	tagatose-6-phosphate kinase	SA1995	N315	1
CTGACATCATTACTATACAAATTATTTTCTCCAGTATCAGAAATGATTATGAATACATCTTATCAAGAGT	lytic regulatory protein truncated with Tn554	SA1949	N315	1
CTGACGGAATAATAACTTTAATTTTATTGAGTGGAAGTTTAGTGAAAAAATACACAGTTAATCAAGGGAA	hypothetical protein	SA0613	N315	1
CTGAGTAAACAAATTAAAAAATATAGGGAACGAGATGGTTATTCACAAGAATATCTTGCTGAAAAGTTAT	hypothetical protein, similar to hypothetical protein	MW2624	MW2	1
CTGATAATTTAATTCTTTTAGGTATCAAAACAAGAGGTGAATATTTAGCGAATCGTATACAAGATAAAAT	pyrimidine operon regulatory protein	SA1210	COL	1
CTGATTATAAACTTAAATCATCATATATGGATAAACAGTTAATACTGGAATTATTCATTCTATCTTTATA	conserved hypothetical protein	SA1643	COL	1
CTGATTTTATTGGAGAATCTAATATTGTTGAAGGACGCATGGTTAGAGATTATGTCGTGAATATTTATGG	ORFID:SA0950~spermidine/putrescine ABC transporter, ATP-binding protein hom	SA0950	N315	1
CTGCAAAATACAATAGCAAAGAAAAAACAGGCGCGTCACCTTATGAAGGTATACGCACCTGTTTATAGTA	hypothetical protein	SA0174	COL	0	1
CTGCGGATTATGAGTTAGAGTTCGAAGTTAAAGACTATAATCAAGGTTTACAAAAGTTCCAATCTTTATT	conserved hypothetical protein	SA0862	N315	1
CTGGAATCGATGAAAATACCACATCACATCACTTATCAAATCAACAATTGAACGACTTAGTAAATATGTT	conserved hypothetical protein	SA1576	N315	1
CTGGATTAACCGACATGCCAATTAAAGATATTGAGGCAAAATATGAAGGGGAAGGTTATGGTAAATTTAA	tryptophanyl-tRNA synthetase	SA0855	N315	1
CTGGCGAAGGCAAACAATTTTTCAGCACTCAAGATATTATTTACGCGAGTAAAATCATTCCATTCTTTTA	hypothetical protein	SAS009	N315	1
CTGGCGCTCAATTAGCAAGTCAATTTACTGCAATACAGACAAATAATCAATTAAGAAAAGCCATGAAATT	putative esterase	SAR0665	MRSA252	0	0
CTGTAGAAAATATTGAAGAGTATTTTCCATTACCTGAACACTTAACATCGACACATAATAGCGACATATT	SOS regulatory LexA protein	SA1174	N315	1
CTGTAGGTATGCTTGGGAAACTTTTAGCTGAAGATATTGAAGGTCTAGATTTCAGTGCTGTAGAATCATT	ORFID:SA0135~hypothetical protein, similar to phosphonates transport permea	SA0135	N315	1
CTGTATCCAAAAAGCAACACCACAAATGTTAAGACAACGTAGTGGTGCTATCATCAATTTATCAAGTGTT	3-oxoacyl-(acyl-carrier-protein) reductase	SA1245	COL	1
CTGTATTTCATATTCATTTCCACTTAATTCCTCGATATGAAAATGATATTGATGGATTTGGTTATAAGTG	Hit-like protein involved in cell-cycle regulation	MW1778	MW2	1
CTGTTATCACAACATTAGCTTTAGGTGCTTGTGGTAATTCTAATTCACAAGATCAAGGTAACAAAACTGA	conserved hypothetical protein	SA0768	COL	0	1
CTGTTCCCTCTTATTATACCAATATTTTTTGCAGTTTTTGATATTTTCCTGACATTTATGCCCGATTTTT	conserved hypothetical protein	SA0025	COL	0	1
CTGTTGCAGTACAATATCCAAACTTTTACGGTTCAATTGAAGATCTTGAAAAGATTCAAAGCTTTATTGA	glycine dehydrogenase subunit 1	SA1366	N315	1
CTGTTTATAGATACACATCATATCATTAATGACGGTATGAGTAATATACAATTAATGAATGATCTTAACG	ORFID:SA0173~hypothetical protein, similar to surfactin synthetase	SA0173	N315	1
CTTAAAACAACATAAAACTTCAAAAGAAATGGTTATTACAATTATCGGCTTAGTACTCATTTTAGTAGCC	ORFID:SA0260~hypothetical protein, similar to ribose transporter RbsU	SA0260	N315	1
CTTAATCGTAAAGGATTACAGATTAGTGCAGAAACTGCCAAAGAACACATACTGGATATTGCGGGAATTC	ORFID:SA2297~hypothetical protein, similar to GTP-pyrophosphokinase	SA2297	N315	1
CTTAGCATTCCATTACAATATTTAGTTGCAGCAGCTTTAGAAGTAACTGATGTGAATATATTTAAGCCTT	conserved hypothetical protein	SA1064	COL	0	1
CTTAGCCGTTATTTCAATTCTACCAATATTAGCAACTAAGTTTATGGGATTACCACAATCAATTCAGATT	preprotein translocase SecY subunit	SA2028	N315	1
CTTATAAATTAGAAGCATTTAGAGGTAAAGTGATTTTAGTTGTTAATACTGCAACAGAATGTATATATAG	glutathione peroxidase	SA2641	COL	1
CTTATCAACCAAATAAACGTAAACATAGTAAAGTTCATGGTTTCAGAAAACGCATGAGCACAAAAAATGG	ribosomal protein L34	SA2740	COL	1
CTTATTATTATCATGGTCATAAAGGACATGGTGCAACAGCTATTGGAAAATATAGATCATTTAGTGGTTA	ORFID:SAS029~hypothetical protein, similar to lactococcin 972	SAS029	N315	0	1
CTTATTTAAAAACGAAAGACGGTAGAACTTTTTATGGTACCAATGTAGAAAATGCTTCTTATCCATTATC	cytidine deaminase	SA1625	COL	1
CTTATTTAAAATCTGGAAGAAACCTAGGTTCAACAATTGCATTACATATAGCAAATAATTTTGTTTCTTT	abortive infection protein family	SA2306	COL	1
CTTCATTCCTGCTATTTCAAATATTGCTGCCGCTTTTATCGGTAACTATATCGGAGGCGGTCTCATTATA	putative formate/nitrite transporter	SAR0302	MRSA252	0	1
CTTCCTTTAAAGTTGATGGTAAAAAATATGAATTTGAACTTTCAGATGAAGATTTAAAAACACAAACACT	conserved hypothetical protein	SA0967	N315	1
CTTCGTAGAGCATAGAACATTGATTTATGTCCCAGCCTGTGACAATCCATCTAACCTTTTCATCAGTTGA	hypothetical protein	MW1725	MW2	0	1
CTTCTGTTAGAATCCCTCAAAATGATATTTCACGATATGTTAATGAAATTGTTGAAACAATACCTGATAG	truncated transposase	SAS055	N315	1
CTTGAAGAAATTCAAGAGAATAATGATAGTTTTTTATTAGATTTAAATGAAGAAGAAGGTCTAATCGCAC	two-component sensor histidine kinase	SA0018	N315	1
CTTGAAGATTTATACGACAAAGAAGGATATCGAGATGGCGAATTTAAAAAAGGTGACAAAGGGATGTGGA	hypothetical protein	MW0398	MW2	0	1
CTTGTATTGGTAATTCGTATTATTTTATTACCATTCATGTTGTCAAACTATAAAAATAGTCATATGATGC	membrane protein, putative	SA2082	COL	1
CTTGTGATTTGTTAGCACATTTTCAATTCTCTCAACCCACACTTAGCTATCATTTGAAAGCATTAGTAAA	ORFID:SA1591~arsenical resistance operon repressor homolog	SA1591	N315	1
CTTGTTAAACGTATTCAAAGAGTCGTTACAGACCATGGCACTGAAATAGGCATTCGTTTAAAACAACCTA	urease accessory protein UreE	SA2283	COL	1
CTTGTTAGAATCACAAGATTCTATTTTCTTTTCACAAACACCTGAACAATTAATAAAGGTCAATAATAAA	ORFID:SA0895~hypothetical protein, similar to menaquinone-specific isochori	SA0895	N315	1
CTTTAAAAGAATTTAAATCTGCAACAGAAGATTTAGACAAAGAGTCTCACGACACACCCAGTAAGGAATC	conserved hypothetical protein	SA0335	N315	1
CTTTAAACTCTACTAAACGTAGATGGAACGCTAACCTTCAAAAAGTTAGAATCCTAGTTGACGGTAAACC	ribosomal protein L28	SA1238	COL	1
CTTTACCAAATGGTAAATCAGTTGATGAAAGAATTAAAGAAGCAATTTCAACAATCGGTGAAAAATTAAG	translation elongation factor Ts	SA1276	COL	1
CTTTATCTAATTCTTACTATTATATTATTAGTGAATAGACAAAATGCGATTAGACCTATAGCGATTATTC	conserved hypothetical protein	SA2241	COL	1
CTTTATTATTTACTATTTTACAATCAGTTTTTATTAAATAAAAATACAGATATTGGATTGGTTGGTTTTG	hypothetical protein	SA1738	COL	1
CTTTATTTTCTTAAAAGTTGAGAAAAAAGTAGATAATCCGCTTATTGATTTTAAATTATTTGAAAATAAA	hypothetical protein, similar to transmembrane efflux pump protein	MW0079	MW2	1
CTTTCAAAATAGTGTTGTAGAGGTGCTTACGTTTAAAGCTATTCAAGCTTGTAAAGAATATAGTGTTCAG	ORFID:SA1854~hypothetical protein, similar to O-sialoglycoprotein endopepti	SA1854	N315	1
CTTTCCCTATAGATTATTTCTATGGTTATTTAAATGAAGTTGCAGGTTGGAACTTAACATTATTCATCGT	conserved hypothetical protein	SA0929	N315	1
CTTTGATAGACGAAAGTGATGAGCTTAATCATTCGATAGAACAATTATATCAACATTTAGGTGACCGTTA	hypothetical protein	SA2372	N315	1
CTTTTATTACGTAAATACTATGCTTTTATAAAACTTGATCATAACGATATTATTAAAGAACTGCAGAAAT	ORFID:SA1092~hypothetical protein, similar to DNA processing Smf	SA1092	N315	1
CTTTTCTCAAGATTTTCATAACCTACAAATAAATATGTCACATTTTAAGAAAGGTATTTCAAAATTAAAG	hypothetical protein	SA2187	COL	0	1
CTTTTCTGTACTTCACTACAGCATGGTCTCTTGCAGGATTCGCAAGTATCGCAATACTCATATTTTTTAA	hypothetical protein	SAV1990	Mu50	0	1
CTTTTGGTTATGGTAATAATGATGAAGATAAAAAAGAAGGCATTCATTATAAAAATTTATTAGGTACTTA	cobyric acid synthase, putative	SA1950	COL	1
GAAAAAAATATATACTTGCCTTGTATATGGCAAAACCCATACATCTGGTATTATTGAAGCTAATATTAGA	conserved hypothetical protein	SA0866	N315	1
GAAAAAGCTGAAGCACGCAACATTTCACAAAAGAGTGCAATGCGTACAGCAGTTAAAAACGCTAAAACAG	ribosomal protein S20	SA1642	COL	1
GAAAAAGGTTCAGGCGAACCAAACAAAACTAAAGTTGCTACAGTAACTAAAGATCAAGTACGCGAAATTG	50S ribosomal protein L11	SA0495	N315	1
GAAAAATTGTTTGCAAATACAGTGATTGAAGAATATAGCTATAAAGTGTTAGATGATGAAAAGGAGAATG	phosphoribosylformylglycinamidine synthase, PurS protein	SA1076	COL	1
GAAAATAATATATTTTTCATTTACTGGAAATGTCCGTCGTTTTATTAAGAGAACAGAACTTGAAAATACG	nrdI protein	SA0791	COL	1
GAAAATGCAGCTGAGACTTCAAATAAAGAAGCTACAGTAGATGCAGACGCGCAACATGATGCTGAACAAC	conserved hypothetical protein	SA0370	N315	1
GAAAATTAGAATGTCCTGCTGGAAAAGTATTGTTTTTTCATGAAGGAGTAAGTATGAATATGATTCAAGC	ORFID:SA0705~hypothetical protein, similar to comF operon protein	SA0705	N315	1
GAAAATTATATCTATATCAGAAACACCGAACCACAACACAATGAAGATTACACTTAGTGAAAGCAGAGAA	conserved domain protein	SA1466	COL	1
GAAACAAAACAAAAGCGTGTTGAAAAGTATATTAACCAAATACTAGAAGGTAAAGGGATGCATGATAAGT	conserved hypothetical protein	SA2238	N315	1
GAAACATGGATTTATAAAGCTATTAATAATCAAACAGAACAAGAGATGAGAGAAAAGTTTAGACACTATT	ORFID:SA2429~hypothetical protein, similar to arginine repressor	SA2429	N315	1
GAAACTAAAATTTTAATATTAACCATGTTTGATGATGAGGAGTATTTGTTCCATGTGTTGCGTAATGGTG	hypothetical protein, similar to response regulators of two-component regul	MW2313	MW2	1
GAAACTAACTTAAATATCAAACGTTTAATGGAAATTTCATCATACCGTGGTATCCGTCACCGTCGTGGTT	ribosomal protein S13/S18	SA2215	COL	1
GAAACTTTTAATTATAATGAAGAAAATAATGCTATAGAAATAAGTGAAAAAGATGACATGTCAATTATCG	ORFID:SA1180~hypothetical protein, similar to exonuclease SbcD	SA1180	N315	1
GAAAGATGTCATGGCAATAGGTGACAATTTAAATGACTTATCAATGTTAGAGAAAGTTGGCTATCCAGTT	conserved hypothetical protein	SA0517	N315	1
GAAAGCAACAATGGAAGAAAATTATAAAGCGATTACTACAGCATTAGGTATTTATGACCTAGGAAATAAA	ORFID:SA2492~hypothetical protein, similar to ABC transporter	SA2492	N315	1
GAAAGGTTACATCACAAGTCAACAATCTAGCGAAGATTTAAGATGTAAAGAATTAATTTTGACTGATCAA	hypothetical protein, probable ATL autolysin transcription regulator	SA0904	N315	1
GAAAGTGAAATTATTGAAAACCATAAGTGTACACACATTGTATCGAATGATTTCTTTACATTGGTTAAAT	ORFID:SA1945~hypothetical protein, similar to mannnose-6 phospate isomelase	SA1945	N315	1
GAAATAATACAAAATGCTAAAGATAGAGATGCGTTATACCTTAATTTAAATGATTATCAATTGTTAATTG	conserved hypothetical protein	SA1327	N315	1
GAAATCATATTACTTAATCCGATGGGTATGGCTATCGAAGATATTTCAAGTGCTTATTTTATTTATCAAC	ORFID:SA0113~hypothetical protein, similar to ornithine cyclodeaminase (EC	SA0113	N315	1
GAAATGAGTATCGGCGTTATTACAAATGATATATATACAAAAGAAGACGAAAAGATATTAGTAAATTCAG	urease accessory protein UreG	SA2285	COL	1
GAAATTAAAGTTTTGGTATTAACAAGTTATGTTGATGATGAACATGTAATTTCAGCAATCAATAAAGGTG	ORFID:SA1666~two-component response regulator homolog	SA1666	N315	1
GAAATTAAATCAGGTGTTATGGAAGGCAATGTTATTACAGCAGAAGAAGTTAAAACTGTTGGTTCATTAC	50S ribosomal protein L10	SA0497	N315	1
GAAATTAATCACATGCACAGAAAAACTTCATTAGGGTACTATTTAGATAAACAATTTGAGGGTCATGGGA	ORFID:SA0330~hypothetical protein, similar to ribosomal-protein-serine N-ac	SA0330	N315	1
GAAATTATTTATTGATAGTACTCAGCAATACGTAAGTGGTGATGTCAGAATTAAATTATTCAAAGGTAAT	argininosuccinate synthase	SA0964	COL	1
GAAATTGAATTAACAAAAACAGAGTATGATTTACTATATCTTCTAGCTGAAAATAAAAACCATGTTATGC	DNA-binding response regulator ArlR	SA1451	COL	1
GAAATTGGTGCTGGTGGACGAGAACATGCACTTGCATATAAACTTAATCAATCGAATCTAGTTAAACAAG	phosphoribosylamine--glycine ligase PurD	MW0957	MW2	0	1
GAAATTGGTTCAACATTAATTGAAGCTGCTAAAGAAGCAGGTATTTATGAATCATTATTAACAGTTAATA	succinyl-CoA synthetase	SA1089	N315	1
GAAATTGTAAAACAGCAAAATATAGATTTATTGATAACTAAACATGATAAAAAGGTGTTTAGTAGTGGCA	alkaline phosphatase synthesis sensor protein	SA1515	N315	1
GAAATTGTTGAAACGATATCTGATAGCGAATTCGATGAATTTATATGTCCTAATAACAAAAGAATAGGTT	IS1272-related, transposase, degenerate	SA1442	COL	0	1
GAAATTTATTAAAGAACAGAAGTCAAAATTATGTGCTCATAAGATTATTAAATTGGCTTAGAACAACAAA	competence-damage inducible protein cinA	SA1127	N315	1
GAACACTAATTAATAAGTTTAATTTAATGAATATCAACTTTAAAATGCCGAGCAAAAAGAATCATATTAA	perfringolysin O regulator protein, putative	SA2546	COL	1
GAACAGTTTATGTTTTATTTCAGCCTTTCATCAATGATATAATAAGCAACTGGAATACTAAGTTTTTATA	conserved hypothetical protein	SA2162	COL	1
GAACCTAAAGAAAGTGACTTTGAATTAACTTTAATGGAAATAGAGTATCCTGAAAAATTCGTCACTTTAA	ORFID:SA1034~hypothetical protein, similar to cell-division protein	SA1034	N315	1
GAAGAAAATGCATTTATGTGCAACCACATTCATATACAATTGAAAATCAACAACAAAATAAACACACGTA	hypothetical protein	SA2224	N315	1
GAAGAAAGAAGTGAAATGGATGGCTACGGGCGTATTAGAGGACGATATTGTCAAAGAGATATATGGCAGC	hypothetical protein	SA1050	COL	1
GAAGAAAGTTTTTAACGAAGCTTTTCATGTGAATAATTACGATATAAATGTAACTACACCAGTTATTTCT	conserved hypothetical protein	SA1258	N315	1
GAAGAAGAAAAATTAGATATTCCACCAGAAGCTTTAAATTATATAGCAAATCAAATTCAATCTAATATTC	chromosomal replication initiator protein DnaA	SA0001	COL	1
GAAGATAAATATGATTACTTAACAGGCTTAGGTAATGTAAAAGAATTTGATAGACATTTAAATGAAATTT	GGDEF domain protein	SA0809	COL	1
GAAGATCCTACAATTATTGAAAATTATATTAATGCTGGTATCGTACTTGCTGATGCGAATGAGATTGAAA	conserved hypothetical protein	SA1448	N315	1
GAAGATGCTGATAAAGTTGAAGCATTCTATGAGAAAATTAAAGATCATTCTTCAATTGAAATAGAATTAC	conserved hypothetical protein	SA2378	N315	1
GAAGATTATTAATATAGAAACAGGTAAAATCACTTTAACTAAAAAAGGTTGGAGTCGAATTGACTCAAAA	conserved hypothetical protein	SA1223	N315	1
GAAGATTTTGACAATGAACGGGTATATTTTAGTAAGCAACGATTAAAGCAATATGAAGTTGATATTGCTG	squalene desaturase	SA2349	N315	1
GAAGCTTTAAAATCTAAAGAAGACAAAATGATTGAGATCAGACGTTATTTACATCAGCATCCAGAATTAT	ORFID:SA0098~hypothetical protein, similar to aminoacylase	SA0098	N315	1
GAATACAAGAAAAAGATAATTGAATTAATTGAAAGTAATTTAACAGGATATGAAATTTCTAAAAAAACTG	hypothetical protein	SA1152	N315	1
GAATAGTTTATTAAAGTTGTATTTTGATAGAAATTTACTGACACCACAAAAATTATTGAATTATTTAAAA	hypothetical protein	SA0131	COL	0	1
GAATATAGTAAAGTCATTGGCATTCATAAATGGATTCAATTTTTATTTATTGTTATTGTAGCGATGGTTA	ORFID:SA1384~hypothetical protein, similar to ABC transporter	SA1384	N315	1
GAATATGAATCCATTAATATTAATCATCGGTTAGGTAAGTTACTTGATTCATATGATATTCCAGATGTTG	ORFID:SA1304~hypothetical protein, similar to component A of	SA1304	N315	1
GAATCAATAATGATTTAAATCAATATGATACAACGCTATTTAATAAAGACAGCAAAGCGGTTAATGATGC	hypothetical protein	SA0273	COL	0	1
GAATCAATACATTACAATCATTTGCTGAGTCGTTTATGAGACCCTGTCAATTAGCTAAGATGATATCGCG	probable type I restriction enzyme restriction chain	SA0189	N315	1
GAATCAATGCTCCATTATACACGCACAGAGAAGATTAAACAGATGTATAAAGAAATAGATGTAAATGAGA	conserved hypothetical protein	SA0170	N315	1
GAATGATGCTTGAAGGTGAAAAAATCAAAGCTTTTTATGAAGATATGCCGCCGTATCAGACTGTCAAAAA	conserved hypothetical protein	SA0673	N315	1
GAATGCCTGCGAGTCAAGCCACACCATCATCAAGATCTGATTCACAAGAGTCAAATACAAATGCATATAA	FtsK/SpoIIIE family protein	SA1791	COL	0	1
GAATGCGTCTAAAAGTGATAAATCTAGTGTAGAAAAAAGTGAATCTAATGAGGAAACTGCTCCTGTAGAG	conserved domain protein, putative	SA1847	COL	1
GAATGGTCATGAGGATTTAGCAAAGGCGAAGTTTTACGTCGATAGAGTGTTTGACTTGTGGGAGGGGTAA	hypothetical protein	MW1422	MW2	0	1
GAATGTGGTGACAGAAACTACATTACAACTAAGAACAAAAGAAATAATCCAGAACGTGTTGAAATGAAGA	ribosomal protein L33	SA1608	COL	1
GAATTAAAGACAGATAAAACAAGGGAAATGATGGATTCAGATGCAGAAATTAATATTAAAGAAAAATCCA	homoserine dehydrogenase	SA1164	N315	1
GAATTATACAAATAGACGATATGAACCAATCTCAAGCTTTAATTGGAAATAATGATGAACATTTAAAAGC	ORFID:SA1400~phosphate starvation-induced protein phoH homolog	SA1400	N315	0	0
GAATTATCATTAATTTTTATAGGTTTAGTATTCGTAATTGAAACATTATCTGTTATGTTACAAGTCGCTA	phospho-N-acetylmuramoyl-pentapeptide-transferase	SA1195	COL	1
GACAAATCGCTAGAAAAGTGGATACAGATGTATTAAGAAAATTAGCAGAGCAAGTTGATGATATTGTATT	ORFID:SA1708~hypothetical protein, similar to UDP-N-acetylmuramyl tripeptid	SA1708	N315	1
GACAACAAAGGATTAAACTTTGTGTTAACGTCTGGGACATTTTTTGTAAAAATGAATGAAAAACAATATC	ORFID:SA0849~hypothetical protein, similar to peptide binding protein	SA0849	N315	1
GACAACTTTAAGATTAATCCGGAATGGTTAATTGAGTTAGATAAATGTGCAAATAGAGACACTGCACCAG	ORFID:SA1440~hypothetical protein, similar to protease	SA1440	N315	1
GACAAGTTATCTAATACTTATAAAAAAGTAGAAGAAACACAACCAAGATTTATAAATCAGTTGTTATCTA	conserved hypothetical protein	SA1465	COL	1
GACAATGCTTTCGATGCTGCTGAATATGATATGACTCATGTATTTCATATACAAGGGGAGTATATACTGC	hypothetical protein	SA0315	N315	1
GACAATTAAAAAGCAAGTGCCTGTATGTTGTTTTACTTTTGGAATTCCAAGCGAATCTATTATAAAAAGA	hypothetical protein, similar to 2-nitropropane dioxygenase	MW0803	MW2	1
GACAATTATTAAAGAGAACTTTAAGGGAATATCCCGGTTTAAACCATAAACAAATGAATGATTTATTTAC	hypothetical protein	SA1168	N315	1
GACACATGGTTATACAGTTGCTACTATTAAACATCATGGGCATGCTAAGGAAGATATTCAATTACAGGAT	probable molybdopterin-guanine dinucleotide biosynthesis mobB	SA2067	N315	1
GACACCTTCCAATCATGTTGAGCAGTATCAAACTTTTAATTTAAAAGATAACGCATATTTAGAATATGTC	urease accessory protein UreD	SA2088	N315	1
GACACGATTTACGAATTGTCTCAAAATCGAAAAATAGATATGAGACTTGCAGCATATATCATAGGTATTA	NAD-specific glutamate dehydrogenase	SA0819	N315	1
GACATCAACTTGATAACGATGTTGAATCGCTTAATTATCAATTAGTAAAAGCTACGGAAGCCTTTGAAAA	chromosome segregation SMC protein	SA1077	N315	1
GACCAGGCTTAGAGATGGCAGGTTATTTTTCACATTATGCGTCAGATAGAATACAACTATTAGGAACAAC	HPr kinase/phosphatase	SA0715	N315	1
GACCATATTTTCATATGATTTGGCATATTTTTATTGTAATAGCATCACTATTGCATTTAATTGCGATCTT	ORFID:SA1973~hypothetical protein, similar to hemolysin III	SA1973	N315	0	1
GACGGACAGTATCGTGGTATTGCAACATGGAGATACGATCAAAAACGTCAACGTTTAATTGGTACAATAG	hydroxymethylglutaryl-CoA reductase	SA2333	N315	0	1
GACGTATTAGGATTAAATATTATAAATGAGACATTAACATCGATACAATATGAAGTAGGTCAAAATAATC	conserved hypothetical protein	SA1037	N315	1
GACGTTAACCTTGAAAATGGTCAAGTAAGTGTTCAATATGATGACAGTAAAGTTGCTGTATCTCAAATGA	copper ion binding protein	SA2573	COL	1
GACTACTTAAGTATGATCCGAGGACAAGTATTAACAACATTTTCCACAATAAAAGTGGTTGATCCAATCG	conserved hypothetical protein	SA2360	N315	1
GAGAAAATATTAGTAGATTGAGTCAATATTATGGTCATACAATTGGTTATATTTCTCAAAATTATGCAGA	oligopeptide transport ATPase	SA1212	N315	1
GAGATGCTTTGTCAAAACATGTTGATGAAGACGACAAGAAAGTTCTAACGTCGCGAAATACGACTTTAGA	hypothetical protein	SAV0855	Mu50	0	0
GAGATTATTTATTAAAGTTAGTAGAAGCACATGACATTGAACATCAATACTATATGTCACCAGGTGGAAC	ORFID:SA1566~endo-1,4-beta-glucanase homolog	SA1566	N315	1
GAGATTATTTATTCGCCTATAGTTTCAGAACAACGCTTTAAAATTATTCCTAAAGCTAAAAGAGGAACAT	ORFID:SA0172~hypothetical protein, similar to integral membrane protein	SA0172	N315	1
GAGGACAAATTCCAAAATCTATCTGATCTAAGATTCATTTCCAAATTTAAGTACTCATACGACGTTCAAA	hypothetical protein	SA1850	COL	0	1
GAGGCAAAGTATGACTTATTAGATATTTTTAAAAACAATCTAGTTAATTTTCTCAATAAGAATGGTCTAA	ORFID:SA1679~hypothetical protein, similar to D-3-phosphoglycerate dehydrog	SA1679	N315	1
GAGGCTATTTTCCAGATATGGAAATGGCCTCTTTTTATAATCAAATTAATAAGAATAAATATGTTTATTA	hypothetical protein	SA1379	COL	0	1
GAGTAAAACTTATAAAAGCTACCTAGTAGCAGTACTATGCTTCACAGTCTTAGCGATTGTACTTATGCCG	hypothetical protein	SAS063	N315	0	1
GAGTACGGTGCAGTAGATACAGTGATTGATGCTATAGATACGATTGTTACATCTAAAGATAATCAAACGA	4-diphosphocytidyl-2C-methyl-D-erythritol synthase, putative	SA0240	COL	1
GAGTATTTGAAAAAGGTACGAAAGTAGTAATGGTGCCGAATACACCTACAGAGCAACATCATATTATCGC	ORFID:SA0242~hypothetical protein, similar to xylitol dehydrogenase	SA0242	N315	0	1
GAGTCACGTATCACCAACAATTAAAGATATGATTGAACGTTTTGTACATGAACATGATGTCATTATGTTT	formiminoglutamase	SA2327	COL	0	1
GAGTGAAACGTTCATTACAATGGGGTAATGATGCTTATACAATGATTTTAGATCGTATGAATATTGAAAC	conserved hypothetical protein	SA1723	N315	1
GAGTTAGTACCTTCTGTGAAAACAGCTGGTAAAATATTATATCGAGATCAAGACATTTTTGATCAAAAAT	phosphate ABC transporter, ATP-binding protein	SA1421	COL	0	1
GATAAAAATACTTATTCATTATATAATGTTAACAAGATGTATTTTAAAGTTTACATTGAGTGAGGGATAT	hypothetical protein	SA0532	N315	0	1
GATAAAGAAAAAATTTATGATGAATGGACAAAACATGGTATTAAACCATTAAAATTTAATATTTATCATG	phosphomevalonate kinase	SA0638	COL	1
GATAAAGTTAAAGAAGGTATCTTTAATAGTTTATATGATGTGTCAGGTATAGGTTTAGATTTATTTGCAG	conserved hypothetical protein TIGR00095	SA1133	COL	1
GATAAATAAAGGTGATATTATAGCGTTGGTTGGACCTTCTGGCTCTGGTAAAAGTACATTTCTAACTATG	ORFID:SA0297~hypothetical protein, similar to ABC transporter ATP-binding	SA0297	N315	1
GATAAATTAACAGATGTATTTGATAAATGGTTATCCTCTGATCTTGCTAAATCATTAAATTGTCATTGTT	conserved hypothetical protein	SA1935	COL	1
GATAAGCAATTACGATATCAAGATATTGCTATTTTATATCGTGATGAATCTTATGCTTATTTATTTGATT	exonuclease RexB	SA0970	COL	1
GATAAGTAAAGTGACTTATATCATGAGTTTACATAACATATCTATAAGCAACTTAAGAATCTTAGAAGTA	prephenate dehydrogenase	SA1197	N315	1
GATAATATTATTTTAGCTCCTAAATTATTAAAGAAAGATAATAACGATGAATTACATAAGGAAGCATTGT	amino acid ABC transporter, ATP-binding protein	SA1915	COL	1
GATAATCACAATACGAAATCAAAAATAATTATAAAAAGTAAATTGAGCAACTCAGGAATAGATGTCACTG	hypothetical protein	SA2695	COL	0	1
GATAATGAAAAAATATAATATTCCAACTGCTGATTATAAAGAAGTTGAGCGAAAAAAGGATGCTTTAACA	phosphoribosylamine--glycine ligase PurD	SA0926	N315	1
GATAATGTGTCTGGATATCAGTTACCACAAGCTCAAATTCAAACACAATCTGTTCATAGTAAAGACATAA	hypothetical protein	MW0045	MW2	0	0
GATAATTATGGTTTAGAAAGAATTTCTAAGACAAATCATGGATATAATTATGTTTATTCCAATGATAATT	hypothetical protein	SA0651	N315	1
GATACGCAGCGTGCTGGGGCTCCGACGACTGATCATCATAAAGCAATGCCAATTATTATACACGGCGATG	2-oxoglutarate dehydrogenase E1 component	SAR1425	MRSA252	1
GATACTGAATATATTAATGGTATTAAGACAAGATTAAATATTCCATTAGATAAAAAAGTGATTATGTACG	TagF domain protein	SA0239	COL	1
GATACTTCAGAAAAGCCAAAAGAAGATTCAAAAGAAACACAAATCAAAAAGAGCTTTGCGAAAACGTTAG	hypothetical protein	SA0403	N315	0	1
GATAGATATTCCTTTAGATGAATCATCATTTATGTATGATACACCAGGTATTATTCAAGATCATCAAATG	conserved hypothetical protein	SA1425	N315	1
GATAGCGATTCCGACTCAGACAGTGACTCAGATTCCGATAGCGATTCAGATTCCGACAGTGATTCCGACT	fibrinogen-binding protein A, clumping factor	SA0742	N315	0	1
GATAGGTATCGTCTTTATCTTATTCCATATTCAAACAATAAGTCATCGTTTATTCATGACATTTATATAT	hypothetical protein	SA0267	N315	1
GATAGTGAAGCGCTTTTTGAGAAAATGTCATTTGCAACAACACTTAATCATATTTTATCAATTTGTAACG	ORFID:SA1273~hypothetical protein, similar to 5-3 exonuclease	SA1273	N315	1
GATATACAAAATAATTTAGGTAGTAATGATAAATTAAATGAATATATTACACATAGAGGTTCTGCTTCAT	Dyp-type peroxidase family protein	SA0415	COL	1
GATATAGAATCACTTTTAAAACATTACAAAATCAAGCTAGAAACTTTTATTGAATTACATTCTAAGACGC	ORFID:SA0672~hypothetical protein, similar to urea amidolyase	SA0672	N315	1
GATATAGATGGTGTTGTATGTGGCGAGATATTGGCGCACGTATACAGCGTTGAACCAGGAATTTTAATGT	hypothetical protein	MW0412	MW2	0	1
GATATCAATATGAAAGTAAAATTAAAACAGTACTTCACGGGTTAAATTTTAGTGAAGAAGATTTCAATAA	hypothetical ABC transporter ATP-binding protein	SA1852	N315	1
GATATCATGACAAATTTAAATGTTATTAAAATTCCAGCTAATATATTATTTGGTGGTAAAGATGAGCCAT	ORFID:SA0416~hypothetical protein, similar to carboxylesterase	SA0416	N315	1
GATATGTATGTGGTACCACCATCAAGACTTATCAATGAAATACCTTACGCAATGAAACAATTAGAAAGTT	conserved hypothetical protein	SA0007	N315	1
GATATTAATAATCAAGTATCTGAACTATCAGTGTTAATTGCTTCTAAAGTTCTTAGAAAAGAAATTTCTG	ATP synthase F0, B subunit	SA2099	COL	1
GATATTAGAAAAGTTTATTTTAAAATTCGTAATAAAAATAATAAACTCATCGAACGATTTAATGGTCTAG	acetyltransferase, GNAT family	SA2245	COL	1
GATATTTCTATTGGTAATGAAGTGGAAATTGTATCGAAAGATGAAATGAATAAAGTAATTATCATTAAAC	iron-dependent repressor	SA0691	COL	1
GATATTTCTATTTTTACGTATGCATCTATAATTTTCACAGCAATACTTGGATTTGTTCTATTCGGAGAAT	conserved hypothetical protein	SA0684	N315	1
GATATTTTCGAAAAATTTATTTCGTCGTCCCACCCCGGCAAGGTTGACTAGAATTGAAAAAAGCTTGTTA	hypothetical protein	SAS087	N315	0	1
GATATTTTTGACTAAACCAAATGCTAACCCAGAAATACAATCACTGTGTCTAATGAATAATTTGTTTTAT	hypothetical protein	SA0673	COL	0	1
GATCAAGCAAGTTATTACATTTGATGAACTTCCAGAACAACTTAACAAAGTAATTAATCATGAAAATAAA	conserved hypothetical protein	SA2160	N315	1
GATCAGTAAGTACAAAACAAATTGCCGAAGCACTAAAAGCACAACATGATATTAAAATTGATAAACGTAA	50S ribosomal protein L9	SA0014	N315	1
GATCATATGAAACCTGATAAACCATTTATTAAAGATTTAACGGATGATGATTTAAAAGAAGCGATACAAA	conserved hypothetical protein	SA0957	N315	1
GATCATTATTATTTCAGTTGCTGCTAAGACAATAACAAAAGTGTTGAGTGCGCTAGTTATGGGAATATTA	conserved hypothetical protein	SA0415	N315	1
GATCATTGGAGATTCAAAAGAAGAACAAATCAAAAAGAGCTTTGCGAAAACGTTAGATATCTACCCTATT	Staphylococcus tandem lipoprotein	SA0485	COL	0	1
GATCCAATTCATAACTCTAAGTTAGTAACTAAATTAATTAACAAAATTATGTTAGATGGTAAACGTGGAA	ribosomal protein S7	SA0592	COL	1
GATCTATTATAAGTTATTTCTTATTAATTACTCTAAAAAAACGTGGTATTCTTCAAAGGTTTATAAAATA	conserved hypothetical protein	SA1314	COL	1
GATGAAAATGGAGCTTTTATCATGAAACATCAAATCGGCTATGATTTACACACACCAAACGTTGATGTCT	gluconokinase	SA2294	N315	1
GATGAAACGATGATTAAAGATCAATTACATAGACAAATTTTAGAACAAGCAATTGTTGATGGACTTAAAA	N-acetylmuramoyl-L-alanine amidase	SA1458	N315	1
GATGAAAGATGGAAAAATGAGTAAATCTAAAGGTAATGTTGTAGACCCTAATATTTTAATTGATCGCTAT	methionyl-tRNA synthetase	SA0448	N315	1
GATGAAGCTACACAAATGGGTAGTCAAACTGGTAAGGATCAATTAGATAAAATTCAATCATATATTGATG	aldehyde dehydrogenase	SA0154	COL	1
GATGAAGTAGACGTGAAAGTATTATCTATTGCTGATGATGGAAAAATTAGTCTTTCAATTAAGAAAGCTA	ORFID:SA0466~hypothetical protein, similar to polyribonucleotide nucleotidy	SA0466	N315	1
GATGAATCAAGCACGACATCAATGAAAATTGAAGCTAAAGAATTAAAAGGTGCGCATATTTTTCTAGATA	UDP-N-acetylglucosamine 1-carboxylvinyl transferase 2	SA1926	N315	1
GATGACAACCAATTACTATGTTGAATCTATAAAATTAAAATTGAATTTCATTATGAATATCGATATAATG	hypothetical protein	SA0933	COL	0	1
GATGATGTATTTAATGCAGTAAGACAAACTGCAGCTCAATTTGGCGATTTCCATGTCATGGTTAACAATG	acetoinreductase	MW0100	MW2	1
GATGCATATGCAGGTGTATTCGGAGATAACGGTGCTGAAAACGTGAATAAAAAAGGAGGAAAAAGATCAT	urease beta subunit	SA2083	N315	1
GATGCGGGTTGTGTTAATTGAGCAAGTGTATAGAGCATTTAAGATTATGCGTGGAGAAGCATATCATAAA	conserved hypothetical protein orfX	SA0023	N315	0	1
GATGGAACGATTCAAGGACTTTTTGAAGTTTTGGATGTACCATATGTAGGAAATGGTGTATTGTCAGCTG	D-alanine-D-alanine ligase	MW2006	MW2	1
GATGGGGTTCCAATATCATCGAATGGGTTATTATTTGCTACTTGCATACGAATATGAGTCTTTTCAAATT	hypothetical protein	SAR0219	MRSA252	0	1
GATGGTGACAAGAAAGACTTTTTAGAAAAAATTCGTAAAGCATTATATATGAGTAAAATTTGTTCTTATG	6-phosphogluconate dehydrogenase, decarboxylating	SA1554	COL	1
GATGTGAATCCAGAAGAAATATGTCGAATAGTAAAACAACACGAGGATGCTCGTAATAAAGTTAACCAAC	ORFID:SA1122~hypothetical protein, similar to precessing proteinase	SA1122	N315	1
GATTAAAAGTATTAGTAGACAAAGAAGATGCACCCGTATTAAATGGTACGACTATTGATTTTAAGCAATC	conserved hypothetical protein	SA0801	N315	1
GATTAAAATTATTAGTTGCGTTAAGCAACAATTTAGATAAAGCTGAAATCAAATCATATTTTGAATTATA	probable L-asparaginase	SA1310	N315	1
GATTAAACATATAAAAAACCATATACCTGATAGTTTTGTTATTGCTGGTAATGTTGGTACGCCAGAAGGT	ORFID:SA1172~hypothetical protein, similar to GMP reductase	SA1172	N315	1
GATTAAATTTAGACTATCTTGATCTAGTGCTTATTCACCAACCTTATAATGATGTATATGGCTCATGGCG	hypothetical protein, similar to oxidoreductase, aldo/keto reductase family	MW2127	MW2	1
GATTATAAAATCAATATCTTAGATACACCAGGACATGAAGACTTTTCAGAAGATACGTATAGAACATTAA	peptide chain release factor 3	SA1025	COL	0	1
GATTATACAGTCACATTAGTTGATCGTATGCCATTTCATGGATTGAAACCAGAATTCTATGCTTTAGCTG	ORFID:SA0799~hypothetical protein, similar to NADH dehydrogenase	SA0799	N315	1
GATTATGTATATAATCTTGTGAAAAAGCATCATTCTGTTAGAAAATTTAAGAATAAACCTTTAAGTGAAG	ORFID:SA0367~hypothetical protein, similar to nitro/flavin reductase	SA0367	N315	1
GATTATTTATGATATTCGAAATGCTAAAATAGGAAATTATTGTTTTGATATTTTTAAAGATATGACTGAG	GTP-binding protein, putative	SA1260	COL	1
GATTATTTTTATGTGGTGAAGTATTAGATATACATGGTTATACTGGTGGTTATAATATTACAAGTGCACT	conserved hypothetical protein TIGR00275	SA1805	COL	1
GATTCAAAGGAATTTATTTGCTTTACAAATGAATCCAGTTATTTTCTTTATTATAAACTTCATTCTCATA	hypothetical protein	SA0571	N315	1
GATTCAGCTAGAAGACAACCTGAGCAAACTGAAACATACGTCAAAGGTTCAGTCGTTGGGTTCTTTACAC	hypothetical protein, similar to alpha-acetolactate decarboxylase	MW2131	MW2	1
GATTCTTTAGGTGATTATGGTAAAGGGATTTTAAAATTGGCGAATATATATAGAAAAGCTGGCATTAAAA	ORFID:SA1143~hypothetical protein, similar to lysophospholipase	SA1143	N315	1
GATTGAAAATGGTGCATGTATTCAACAGTCTGTTGTTAATGATGCTAGCGTAGGAGCTAATACTAAGGTC	ORFID:SA0457~UDP-N-acetylglucosamine pyrophosphorylase homologue	SA0457	N315	1
GATTGAAAATTTATTTGATATACCTGGTATTGGTTATCTATTAATGGATAGTATTAAATCTCGAGATTAT	peptide ABC transporter, permease protein	SA1417	COL	1
GATTGCATTAGCTGCCTATAAATATTATTCTGATAAAAATGATGTTATGAAACCACATCAAATATATGGT	sucrose operon repressor	SA1847	N315	1
GATTTAAATCTAACACGCGTGAGGAAATCATTAGATATTTACAATCTATCCAACAAACATTGAATAATTA	tryptophan synthase alpha chain	SA1205	N315	1
GATTTAATGAGACATATGCTGAACAAATGAAATCAAATAATTATATGAATAGCGCGATTGTAGAGTTTAT	ORFID:SA2217~hypothetical protein, similar to lipoprotein inner membrane	SA2217	N315	1
GATTTATATGAAACTAAATCTATTTTAGAAAATGTCATATTATCAACATGTAATCGAACTGAAGTATATG	glutamyl-tRNA reductase	SA1719	COL	1
GATTTATCCGTGCCGAAGTAACAAGTTATGATGACTATGTACAATATGGCGGCGAAAGTGGCGCTAAAGA	ORFID:SA0351~hypothetical protein, similar to GTP-binding protein	SA0351	N315	1
GATTTATGAAAAATGGATTTTGAAGAATGTGAATCAAAAGATGCGATATAGTATTAAGAAAATGTGCCTT	hypothetical protein	SA1027	COL	0	1
GATTTATTCCAGGCACTTTGAATACAGAAATCTATGACAGTATTATTAAAGTAGGAAATGATACAGCGAT	cysteine synthase	SA0557	COL	1
GATTTCAAACGTAAAGGTGCAGAACTTGCCAACTTCTATACAGGTATTATAAATGACTTGTTGCGTGTTG	lipase precursor, interruption	SA0390	COL	0	1
GATTTTAAAAGATGCAATTAAACCAAACTTAGTACAATCAATTGAAGGGACACCTGCATTAGTTCATGGT	formyltetrahydrofolate synthetase	SA1553	N315	1
GATTTTAGCGTTACTGCAAATAATTTTATATTAGTAGTGGATGCTGGTCACACAAGAACTTCAAATATTA	hypothetical protein	SA2468	COL	0	1
GATTTTTTAATTCTTTTATTAAATTAATACTTTTCTGCAGTGTTATTAACTCAATTGTACTAATTTTGTC	hypothetical protein	SA1600	N315	0	1
GCAAAAAACTAGTTAAAGCAGTTGTTGAACACGCTCGAGAAAATCATTTAAAAATTATTGCCTCATGTTC	conserved hypothetical protein	SA2309	N315	1
GCAAAACACCGAACGATCCATTGTTAGAATCGTTGATTGACAGGGAAGATGTCATATTAACACCACATAT	ORFID:SA2346~hypothetical protein, similar to D-specific D-2-hydroxyacid de	SA2346	N315	1
GCAAAAGATATAGCGGCTTTTAGTGTACTTATAGTTTCAATATTAGCATTTATTATAGGTTTAATAGTAT	ORFID:SA1398~hypothetical protein, similar to diacylglycerol kinase	SA1398	N315	1
GCAAAATATGATGAAGTATACGGCTTAACTAAAAAAGGTAGTAAGCAGTTTATTCTCATTAGTGAAAATG	hypothetical protein	SA1933	N315	1
GCAAAATTTATTTCGTTGTCCCACCCCAACTTGCATTGTCTGTAGAAATTGGGAATCCAATTTCTCTTTG	hypothetical protein	SAS005	N315	1
GCAAACTATGTGTTAGCCAACGAAGCTAAAGTTTTCCGCAAAGGTGGCGTATCACAACATACGGTTTATA	hypothetical protein	SAR0248	MRSA252	0	1
GCAAACTTATTGAGCGACTTACTGGAGAAACATATAACAATATCGAACTCATCAAATCTTTATCAATTTA	hypothetical protein	SA0576	N315	0	1
GCAAAGAAAGTATGGGTATTGTAAGAACAACTTTTATAATAGATGAACAAGGTAAAGTATTAGATGTTAT	conserved hypothetical protein	SA1680	N315	1
GCAAGCAATCAAAAGTAATGAATCATTTAAATCTATAATTAATAGCGATACACCTGTAATTGTTAAATTT	ORFID:SA0758~hypothetical protein, similar to thioredoxin	SA0758	N315	1
GCAAGCGATTCCGACTCAGCGAGCGATTCCGACTCAGACAATGACTCGGATTCAGATAGCGATTCTGACT	clumping factor A	SA0856	COL	0	1
GCAAGTAAACAAAGTTATTTATATTTTATTAGCATTGTTCTTAGGTAGTTTTGGTATTCATAAATTTTAT	conserved hypothetical protein	SA1226	COL	1
GCAAGTACATCAAATTGACTTAGGTATAGAATTACAGTCATTATTATTCTTTATGAAAAATTACAGTGAA	conserved hypothetical protein	SA2035	COL	1
GCAATCGTAAAAGTAACAGATGCAGATTTTGATTCAAAAGTAGAATCTGGTGTACAACTAGTAGATTTTT	thioredoxin	SA1155	COL	1
GCACAAGCAGAAGCGGATAAAAGTGTGGCTGTATCAAATAAAGAATCAAAAGCAGTGGCATTGAAAGCAC	conserved hypothetical protein	SA1788	COL	0	1
GCACCAACTAATATTATTCCAGGATTAGATTTTTCTCCAGACAAAATGTTGCAAGGGCGTTTATTCTCAT	Catalase	SA1170	N315	1
GCACCTAAAGAAAAACAGTCAATTATTGACCAAATTAAAAACTTAGAAGGTTCATTCCATTTTGAAACAT	alkyl hydroperoxide reductase subunit F	SA0365	N315	1
GCACTTTATACTCTAAATCAGAATTGGAAGAGTTATGCAAAGTATGTAAGCAATATCAGCTTCCATTATT	conserved hypothetical protein	SA1154	N315	1
GCAGATTTAGCTATCTTATTAGGAATTAATTGGCTCGCAATTTTACTATATATTGAAGCTTTTGTATCAC	ORFID:SA2239~hypothetical protein, similar to amino acid transporter	SA2239	N315	1
GCAGATTTTGTAAATATCGCACGTGGCATGATGATTAGTGTCGGTTGTATTATGAGTCAACAATGCCATA	ORFID:SA2248~hypothetical protein, similar to glutamate synthase (ferredoxi	SA2248	N315	1
GCAGGAATCGGTACAGCATTAGTAGGTCAAGCACATCATGCAGATGCTGCTGAAAATTATACAAATTACA	ORFID:SA2097~hypothetical protein, similar to secretory antigen precursor	SA2097	N315	1
GCAGTAGAATTTATAGCACAAAAAAGATTAGAAAAGCATAGTTGGAAAGCTGGAAAATCGAATAGTAAAT	hypothetical protein	MW2625	MW2	1
GCAGTGGTATACGCTGTATTTTATAAACATACATTTAATATTGGTTGTGCAATTGCAATTGTTGTAGTTA	glycerol uptake facilitator protein	SA1319	COL	1
GCATAGTCCAGAGGTGAACCTAGGAACACCATCTTTAATGTTTAAAGAGAAAAACTTTGATGCATTATAC	conserved hypothetical protein	SA1340	N315	1
GCATCATAATCAAGCAGCAGAAATCGATAATTTAATTTGGTATTTTAGTGAGTTATTTAAAAGTGAATTG	ORFID:SA0697~hypothetical protein, similar to glycerate kinase	SA0697	N315	1
GCATGTCATAAATCTTATACGAAGTCAGATGTTATTGATAGAACTTTGAAACATTGTGATAATTGTGGTG	ORFID:SA1999~hypothetical protein, similar to regulatory protein, SIR2	SA1999	N315	1
GCATTATTCAATTTATCACAATTGATTTTGGTAGTTTTTTCTTAATGGGTATTATATTAATCTTGATTTC	hypothetical protein	MW1039	MW2	0	1
GCATTGAAACTATTGAAGGCTTCCAACAAATGTTTGTCACTAAAACATTAAATACCGAGGATACAGACGA	conserved hypothetical protein	SA0160	N315	1
GCCACTTGTAATATCTGGTGGTATTTTAATGGCAATCGTATTTTTATTTGGAGTAGACTCATTTAAACCA	fructose specific permease	MW0662	MW2	0	1
GCCCAGACATCACACGCTTTAGAGATTTACCTGACTGGATTAAAGAGAATAAAGCGTTATTTACAGATAA	conserved hypotehtical protein	SA2481	N315	0	1
GCCCATTACTCAAGAAGAATGGCAAAGATACGATACGTATTTTGATAAAATGATTGAAAGAAACAAGAAA	conserved hypothetical protein	SA0546	N315	1
GCCCGCCATGGTGTTGCTATGGAAAATGGTTTGCAAGAACTTAAAGATGTAGCGAACAATATTACATTCA	conserved hypothetical protein	SA0832	N315	1
GCCTAAAAATGTCATATATGTAATCAGAGTAGAAAGTGTTGAGGCGTTTCAGAAGTTGTTTAGAAAAGTA	hypothetical protein	SA0094	COL	0	1
GCCTACTAAATTGATATTAAAAGATGCATCTTATTTACATAGCAAAACATCGATAACATTTATTTTAAAA	hypothetical protein	SAS1812	MSSA476	1
GCCTGGACACTTTGACATTTATGGACCTCAAATTTTAATTCAAGAACTATCTAACTATTACAATCAGGTT	hypothetical protein	SA2488	N315	0	1
GCGAAAAATGTAAAGTCATTAAACGTAAAGGTAAAGTAATGGTAATTTGTGAAAATCCAAAACACAAACA	ribosomal protein L36	SA2216	COL	1
GCGAAACAGATCCAATCACATTAATTAAAATAAAAGATATTTATGAAAGCATGGAAGAAATTGCTGATAA	conserved hypothetical protein	SA0618	N315	1
GCGAACTATCAATGATTTATGTCGATACAGGAGCAATGTATCGTGCATTAACATACAAATATTTAAAATT	cytidylate kinase	SA1518	COL	0	1
GCGAATTATGAATATTATTGTACTAAATGTCATGCAAAATATATACGTATCCGTAAAGTTGATACGAATC	conserved hypothetical protein	SA1867	N315	1
GCGACAATCGTACTTTGTACGTTTGTAATTTATATCATCACATTATTTTTCACAAAATTTACGAATAGAA	ABC transporter, permease protein	SA0689	COL	1
GCGATGACAGATGTGATTACAGGTAACACGAAACGTATTTACCTATCGCATTTATCACAAGACAATAACA	conserved hypothetical protein	SA0021	N315	1
GCGCATAAACATGTTAGAAGTAAAAATGAAGATGAAAGTAGCCCGATTATCAATAACAAAGTAATTACAT	conserved hypothetical protein	SA0983	N315	1
GCGGATTAGGTACACTTATCGGAACGCCGCCGCTAATTATTTTAAAAGGACAATACATGCAACATTTTGG	putative sodium:sulfate symporter	SAR2009	MRSA252	0	1
GCGGTTACGGACGTGGACGTCGTATGCAAATTGAGAAAGATACAGTAGAAATAGTATCAGGCGTTAGAAA	chorismate synthase	SA1506	COL	0	1
GCGTAGTGAATTAGTGCAAGTGATTGGATCTATGATAGTGATTTATAGAGAATCTAAAGAAAATAAAGAA	conserved hypothetical protein	SA1423	N315	1
GCGTCGGCACAACAGTGGTTGAGGGTATTCAACAAACGGCTAAAGCTGAACATAATGTGAAACTAATCAA	serine protease SplE, putative	SA1865	COL	0	1
GCGTGCTTATAACATCATTAAATGAATTAGATGCTGCCTTAGAGGGTAAAGTAGGTACTGTGATTAAAAA	hypothetical protein, similar to carbamate kinase	MW1051	MW2	0	1
GCTAAAAGATTTAAAATTGTTATCAAAGAAAAGAAGTTTACAAGACGAAAGAACAGTTATTGTTTATGTT	staphylococcal accessory regulator R	SA2287	COL	1
GCTACAGGCCATATTGTAAATCTATATTTTCCGTTTGTTGAAGTTGAAATGATGTTAACATTGTTGGATA	ORFID:SA1450~iron-sulfur cofactor synthesis protein homolog	SA1450	N315	1
GCTAGATGAAAAAATGAAAAATTTAGATGATTATATGCGTTATTTAATTACTAAAAAAGAACAACTTAGC	conserved hypothetical protein	SA1945	COL	1
GCTAGTTATATCGTCTCAAGTTAAAAGTTTTATATCTTATGTCGTAATTATTAATACAAAGGTTATTCAT	hypothetical protein	SA1556	COL	0	1
GCTATATAGCTGTTCCAAGCAAAATGAGAAAGCTCAAAATAAATCTGTTAATCCAAATGAGTATGCAAAG	hypothetical protein	SA2473	N315	1
GCTATGAACATAGAAGATGGTCGTTTAAATGTCATTTTAATGGTCGGTGTGAATGGTGTTGGTAAAACAA	signal recognition particle	SA1078	N315	1
GCTATGTTAGGTGTTACTGAACCAGCTATGTTTGGTGTGAACTTACCTTTGAAATATCCATTTATCGCTG	PTS enzyme II, phosphoenolpyruvate-dependent, trehalose-specific	SA0432	N315	0	1
GCTATTAAAGCTAGCTAAACAATATCATGCAAGTATTATTACGACAGATTTCAACCTAAATAAAGTTTGT	conserved hypothetical protein	SA0485	N315	1
GCTCCTCACTTTAAATATTTTAATTACTAAAGGATCAGAATTAGGTGTAACCTCACTTCTTTTTATCACT	Blt-like protein	SA1269	N315	1
GCTCTGATGAACAAGGTATTGTTCACATGGTAGGACCTGAGACAGGACTTACACAGCCCGGCAAAACAAT	3-isopropylmalate dehydratase large subunit	SA1864	N315	1
GCTGAACAATTATTAGCTCAAGTGAATCAATTATTAGCAGATAAAGATCATTTACATCTTGTTTTTGAAT	staphylococcal accessory regulator S	SA0096	COL	1
GCTGACAAGGATAAAAAAGTTGTCACTGAACCAAAAAATACAAAAGTAGAAAATGGTAAAGTGACAACAT	lytic regulatory protein truncated with Tn554	SAV2147	Mu50	1
GCTGGGAAAGATCCAAAAAATGATCCGATTTTCTTGGAAAAATCAGATTCAGATGCTGTAAAGCCATATA	putative lipoprotein	SAR0463	MRSA252	0	1
GCTGTATCTGTACCATCTTTTGTACTTGCTGTACTTTTACAATATGTATTTGCAGTTAAATTAAGATGGT	oligopeptide transport system permease protein	SA0845	N315	1
GCTGTGCCAAAAGATTCACCAAAATTATTGTCACAAATTAATAAAACGATTAAAGAGGTTAAAGATAAAG	ORFID:SA1675~hypothetical protein, similar to glutamine-binding periplasmic	SA1675	N315	1
GCTGTTTAACAATAAGTATTTGTGCAGGTATTGGTAACGGCTTAATTTTTAAATTAGTACCATCCTACTT	nitrite extrusion protein	SA2176	N315	1
GCTTATAGTAAAGTGCAAACGCTCAATAATGAAGGGAAAACAGTAGAGATAATGGATGATATTGATTCTT	conserved hypothetical protein	MW1238	MW2	1
GCTTATATTTATTCTTTGACTTTGCAGGTTATAGTTTATTTGCGATAGCATTTAGTTATTTATTCGGTAT	DltB protein	SA0936	COL	1
GCTTCGATGAGATTGAATTAAATCGAATTGAGATCAGTGCCGCAGTTAATAATGAAAAAAGCCAAGCTAT	putative acetyltransferase	SAR0339	MRSA252	0	1
GCTTGCATCATAAATATAATAAGAAAGTTATGATGGCGAAGTTTAACAATTTTCATGAACTAAAACAACA	conserved hypothetical protein	MW0701	MW2	1
GCTTTAGAAAATACACGTGATAAAGTTAAGGATTTCAATCATGTTTCTTTAATAAAAGATGGACATGAAA	conserved hypothetical protein	MW1704	MW2	1
GCTTTATCTATAAAATACTTTATGTTGTCAAAATCAACGCTTATACATATGACATAATGACGGAGGACAT	conserved hypothetical protein	SA0199	COL	0	1
GCTTTGTTACCTATTGGATATGCAGATGGCTATTTACGCATAATGCAAGGTAGCTTTGTAAATGTAAATG	alanine racemase	SA1874	N315	1
GGAAAATACCTTTAAATTGTGAAGCTTGTGGCAATAGAAATTATAATGTTCCTAAGCAAGAAGGCACGGC	50S ribosomal protein L33 type 3	SAR0538	MRSA252	0	1
GGAACAAATCAACTCATCATTTGTTCCAATGATATAGAAATGGGCGGAGGATCTATGCTTTATACAGTTA	Drp35	SA2480	N315	1
GGAACGATTATCGATCAATTTAAATTGATGTTTAAAGATGGAGAAATTATTGATTTTTCAGCTGAAAAAG	aminopeptidase ampS	SA1695	N315	1
GGACCATTTATGGACTTTATATTACCTAAAATACTATTAAGAAGTCCTGAAAAATTCACATTAGCAGTTG	ORFID:SA0209~maltose/maltodextrin transport permease homologue	SA0209	N315	1
GGACGAGTGGTAACGAAACGTATACCGCAGCATCGTGTAAAAACAATACAAACAAAAGAAAGTCAACCAA	hypothetical protein	SA1978	COL	0	1
GGACGTCGTAGACATTTATTAAACTACTTACGTAGTAAAGATATTCAACGTTACCGTGAATTAATTAAAT	30Sribosomal protein S15	SA1116	N315	1
GGAGACAGACAGTTGCAATCATGCATAATCCTGAAATACGTATACTGTGTAGACAGTTATTACTAGATGG	ORFID:SA2393~hypothetical protein, similar to 2-dehydropantoate 2-reductase	SA2393	N315	1
GGAGATAAAGTTTCCCCTAAGTTAGCACTTGTGCATCCGAATTTTAAAGTAGATGTCGTATACCAAGGTA	hypothetical protein	SA2444	N315	0	1
GGATAATGAACATAACGTTTATAATCATTGGGGAGGACTTGATATAAATGACTATAGATCGACGTATTAG	hypothetical protein	SA2611	COL	0	1
GGATAGGTACATGTTGGAAATCGCCATTATATATCTATGATCCTAAAGTAAGAAAAACACTTGGTATAAA	conserved hypothetical protein	SA0757	N315	1
GGATATAAATCATCATTAAAATTGATTGACGATTTATATGAAAAGTTAAATATTGAAAAACAATCAAAAT	lipoprotein	MW0088	MW2	1
GGATTCGAAATATTTAATAAAGGTGAAGGTCCTATTCTTGGTGGCAACTTAGGAGGAAGTTTATTATCAA	lysine-specific permease	MW1625	MW2	1
GGATTTAGACTTACAGTTGAGACGTCGAGGAATTGATACAATTGTTCTTGGCGGTGTAGCAACACATGTT	putative isochorismatase	SAR0188	MRSA252	0	1
GGATTTAGTGCAAGCAAAACATATGATATAGAAGTTTGGTTACCAAGCTACAATGATTATAAAGAAATTA	seryl-tRNA synthetase	SA0009	N315	1
GGCAAATTGTAGATGAAACAGCATTAATCGATGCACTAGACAATAAAGAAATTTTAGCATGTGGTTTAGA	ORFID:SA0791~hypothetical protein, similar to glycerate dehydrogenase	SA0791	N315	1
GGCACAGTTAAGTTACACTTTATGAAACAATATAATAAATTTACCGATATCGATTATGCACATGCAGATA	replicative DNA helicase	SA0015	N315	1
GGCAGAACAATCAAAACAGAAACAAGCTAATGAACAACAAAAGGCCCAGAACTTATTCGCACGTTGGAGA	hypothetical protein	MW1600	MW2	0	1
GGCATGGTCATTTGTCTTCTTATGAATTTGAGCCAGATAAAGAATCTATCTTAAGTGTAATCTTGCCTCA	ATP synthase F1, gamma subunit	SA2096	COL	1
GGCCATCCTGAATACAGACATACTGATGGTGTAGAAGTTACTACTGGACCACTTGGACAAGGTTTTGCTA	transketolase	SA1177	N315	1
GGCGCAATTAATGTACATGCATCATTGTTACCAAAGTATAGAGGTGGTGCACCAATTCATCAGGCAATTA	methionyl-tRNA formyltransferase	SA1059	N315	1
GGCTTATTTATTCAATGTCATTTTGCTGAAAATGAATCTCGAGTTTTAACAGGTGGTTATTACAAAGGAA	ORFID:SA2472~hypothetical protein, similar to ATP phosphoribosyltransferase	SA2472	N315	1
GGGAAATGAAGTGCCAATTGTAGATCGTTTAACATTAGATTTAATTAAGCAATTAATTCGTATGAATAAT	ORFID:SA1442~hypothetical protein, similar to caffeoyl-CoA O-methyltransfer	SA1442	N315	1
GGGCTGTTAGCAAGTGTGCTTAATACATTTGCTTTGTTTAATATTAATTTATCCTGGATTGAGTCTCGTC	ORFID:SA1731~hypothetical protein, similar to chorismate mutase/prephenate	SA1731	N315	1
GGGGATTTTGAACCAGTATCGATTAAGATGGCTAAGGATCAAAATTTATCATTAAATCCAACTAAAATTT	conserved hypothetical protein	SA0527	COL	1
GGGGGAAAATTTATTAAAAGCAATCCAAGACGTGACAGGTTTAGAAGAACATGACCCTGTGATTCAAGCT	ORFID:SA0231~hypothetical protein, similar to flavohemoprotein	SA0231	N315	0	1
GGGGTATCTGAGCATTTATATCATATAGGCGCTGTTTATATTGGTAGCATCTTTGGTATAATAACTTTGA	nitrate reductase gamma chain	SA2182	N315	0	1
GGGGTGGCTGAGACGGCACCCTAGGAAGGGACCCGTCATCAAAAATTCTATTTATAGAATTTTACAGTAA	hypothetical protein	SAR0249	MRSA252	0	1
GGTAAACACGCAGATAATATATCAATTGGTGGAATTACAAAAACAAATAAGAATCAATATAAAGACCCTG	exotoxin homolog [Genomic island nu Sa alpha2]	MW0394	MW2	0	0
GGTAATGAATCAGAGCTAGTAGACCAAATTCGTCTAAGTGATACGTATGACAATAACTTAGAAATAGTAG	conserved hypothetical protein	SA0741	N315	1
GGTACATTTTTAAGAAACATACAAGTAACATATACGCATGCACAACTAAAAGGTGGTAATAAAGAACCTT	conserved hypothetical protein	SA0526	N315	1
GGTAGTAACATTATTGAGAACAGTAATGTTGTTAATGGGTATATATTTAATTATTCGAGCGTTGATTTAA	conserved hypothetical protein	SA0783	N315	1
GGTATTGATGTCGAATTGATTAAATTGAATGGTTCTGTTGAATTAGCTTGTGTCGTAGATATGGTAGACG	ATP phosphoribosyltransferase	SA2471	N315	1
GGTCCGATGGCGCGGGTAGCTGCTGTTTTAAAAGCTAAAAGTGTCAATGAATTATGGTTTGGATTAATAC	putative transporter protein	SAR2696	MRSA252	0	1
GGTGATTACATTACCTATTTCAGCATTGTTAGCAGGTTTACTATTCTATATACTTAACTTATTTTTCTAA	phosphate transporter family protein	SA0722	COL	1
GGTGATTATAGAAGGTATAGTACATATTTCAAAAAAGAATAAAGCAATCGATAACTTTTTAAACCAAGTT	hypothetical protein	SA0088	N315	1
GGTGTTAAAGTTATAGATAAATTAACTAATGAAAATTATACAATTAAGGCTAAAAAAGTGGTTAATGCAG	aerobic glycerol-3-phosphate dehydrogenase	SA1321	COL	1
GGTTACAAGTATTTAACAGATACTTATAAAAGCTATAAAGAAAAATATGATACAGCAAAGTACTACTATA	IgG-binding protein SBI	SA2418	COL	1
GGTTATCGTCCACGTGTCTATACTATTCCGGTGGGAAGCATTGATGCGTTATCATATCCTAAATTATCAA	ORFID:SA2441~hypothetical protein, similar to lipopolysaccharide biosynthes	SA2441	N315	0	1
GGTTATGTTATTAACTGATTCTCCATCAATCAGAGACGTGTTATTATTCCCTTATATGAGACAAAAATAA	lysyl-tRNA synthetase	SA0475	N315	1
GGTTCAATCATTACATGAGTTTTTAGAGGAAAATATAAATTATCTAAAAGAAAATGGTTTGTATAATGAA	aminotransferase, class II	SA0596	COL	0	1
GGTTTAAAAACAAATGATAAATATGTTTCTTTAATTAATTATTTACCTAAAAATAAAATTGAATCTACAA	gamma hemolysin, component C	SA2421	COL	0	1
GGTTTACATGGCATTTGGGATACATCTTTAACTGTACTTGGCAGTGATACGTTGAAAATATTTATTTTAA	hypothetical protein	SA0228	N315	1
GGTTTAGATATTATACGCAAAAAAGGTTTCTACAGTCAAATAGGTATTTTTAAGGATGCTGAAATTCCAT	sorbitol dehydrogenase	SA0239	N315	1
GGTTTATTAGTACCTGTAGTGAAACATGCTGATCGTAAGTCTATTTTCCAAATTTCAGATGAAATTAATG	dihydrolipoamide S-acetyltransferase component of pyruvate dehydrogenase co	SA0945	N315	1
GGTTTTACAATTGGCTTATTAATCAAAAAATTTATAAAGAATATGTAGAAAACTTTTATTTACATCGAGG	conserved hypothetical protein	SA0161	N315	0	1
GTAAAAAGTAGTGCAATTAGTAATACAATGATTTGTGCATTAGCACAGCACAATTATGAATTAGCAGGTA	ORFID:SA1166~homoserine kinase homolog	SA1166	N315	1
GTAAAAATCCAATGGATGGTTCTCAAGTAACAGGTGTTATTGTTACTGGTACAATCAATAGAGAAAACTA	conserved hypothetical protein	MW2606	MW2	1
GTAAAAGAAGCAATTCAAGAATACTATCCAAATTTTACATTAGATTATGATGTTGATCCTATTAGACAAG	ORFID:SA0511~hypothetical protein, similar to UDP-glucose 4-epimerase relat	SA0511	N315	0	0
GTAAAATTACAATTGGTTTAGTAGGTAAATATGTTAGCTTACAAGATGCATATTTATCAGTTGTTGAATC	CTP synthase	SA2119	COL	1
GTAAACTTAACTCGTTCTAAATTTGAAGAATTATCAGATTCATTAATTAGAAGAACAATGGAACCTACAC	dnaK protein	SA1637	COL	1
GTAAAGAAGACAACAACAAACCTGGCAAAGAAGACGGCAACAAGCCTGGTAAAGAAGACAACAACAAGCC	Immunoglobulin G binding protein A precursor	SA0107	N315	0	1
GTAAAGTGTTTAATTATGGTCAACAATATGGTGAATTAATTAAACTTAAGGTTGAAAATATGAGAGAACA	DAK2 domain protein	SA1240	COL	1
GTAAATAAATATTACGAATTACGTAAAGAGTTAAAAGCAAAAGGTGATTACGAAGCGTTAAGAAAATTAC	ribosomal protein S14	SA1370	COL	1
GTAAATATGATCTTCCAACATTTTAATTTGTTATGGTCAAGGACTGTGTTAAAAAATATTATGTTTCCGC	ABC transporter ATP-binding protein homologue~ORFID:SA0769	SA0769	N315	1
GTAACTACGTAACATTTGGTGAGTTTGGTTTACAAGCTACAACAACGTCTTGGATCACATCTCGTCAAAT	ribosomal protein L16	SA2232	COL	1
GTAACTGGTATTGTTTATCAAGATAAAGAAACACCATCATATGAATCTCAAATTAAAGAGTTAGATGATA	pyruvate ferredoxin oxidoreductase, beta subunit	SA1309	COL	1
GTAAGTACATTATTTATTATTAATGAAGATAACGATTTTGTTGGTGTGTGTTCAAGAAAAGATTTATTAA	CBS domain protein	SA1621	COL	1
GTAAGTATTGCTGATGTCAGTTATTATGTAACTGAAGATTCAGCTTTAGATAAAGAAGCTTATGATAGAG	ribonuclease R	SA0735	N315	0	1
GTAAGTGAAAGAACGCATACAACTAAAGAAGATGATATTCCAAGCTTCATTAGAAATAGAGAAGAAAGAC	cell division protein	SA1029	N315	1
GTAATATGGGTGTCGTACCACCGATTGAAGGTTTTTTACAGGGATTAAGAGATATTACGACTGAATACGG	glutamate-1-semialdehyde 2,1-aminomutase	SA1491	N315	1
GTAATTGACCCTGAATTAGGAATTGATATCGTTAATTTAGGTTTAGTATACAAAGTGAATGTTGATGATG	conserved hypothetical protein	SA0833	N315	1
GTAATTGGAAGCAGTTTTTAGCAGATAAGTTTGCCAATATGAGATGCTATACTGAAAAAGTATACTTGGT	hypothetical protein	SA0120	N315	1
GTAATTTCTACAGACAATGCAAGTTGGCGGGGCCCCAACATAGAGAATTTCGAAAAGAAATTCTACAAGC	conserved hypothetical protein	SA0412	COL	0	1
GTACAATTAGTATTAAACTTTATTATCGCAGTGTTTTGGTTGTTTGTAACAAATAGTTACACAACAAATA	Na1/H1 antiporter subunit	SA0809	N315	1
GTACAGCTGTTGGTACAGGTATTAATGCACATCCTGAGTTTGGTGATAAAGTGGCACAGTATATTTCTGA	fumarate hydratase, class-II	SAR1942	MRSA252	0	1
GTACATCTAAATTAATGTTAACTGATTTTCAAAAAGAGAATTATAATAAATATATTCAAGGTCAGAAACA	hypothetical protein	SA0259	COL	1
GTACATTATAAAATACATATCAAAAAAGCTAATTTCCATCAAATAATTAATAGAAATCAGCTTTTTTACA	truncated transposase	MW1278	MW2	1
GTACCGAAACACTTTGAAAAGGTTGATACTTTACCTTATACATCAACGGGTAAATTACAGAGAAATAAGT	O-succinylbenzoic acid-CoA ligase	SA1615	N315	1
GTACGATTGATTTAAATCAGTACTATTATAAAAATAGATCAAATGCAGCAAGTTTTATTATGATGGATTA	hypothetical protein	MW1716	MW2	1
GTACTATACTTTACATGTGTAAAAGATAATATTGTTCCATCAAAAGAAGTGATTACATTAAACAAAATAG	conserved hypothetical protein	SA1899	COL	1
GTAGAAAACAAATCTGCTTACTTAATCGGGTCTGGGTTAGCTTCACTTGCGGCAGCTTGTTTCTTAATTA	67 kDa Myosin-crossreactive streptococcal antigen homologue~ORFID:SA0102	SA0102	N315	0	1
GTAGAGAAACTACTCATTAAAATTGACGATATGTTAGAAGGAATAGAAATATATGATTTCCTTGAGTCTA	hypothetical protein	SA1621	N315	0	1
GTAGAGTACATGGATGATAAGTATCCATTCTATTTAGATCCAATGCCAAACCTTTATTTTACTAGAGATC	arginine deiminase	SA2428	N315	1
GTAGGATTACTGAGACTTTTGGCAAATATCAACATTCACCATTTGATGGTAAGCATTATGGCATTGATTT	ORFID:SA0205~hypothetical protein, similar to lysostaphin precursor	SA0205	N315	1
GTAGGCATTATTAACATATATTTTGAAATTTTAGAAGATAAAATTAAAATTGTTATTTCTGATAAAGGTG	anti-sigmaB factor	MW1989	MW2	1
GTAGTGAATCCAATTATCATGGCAGTATTGTTCACGATTTTCACAGCAATTTTTGCTGCAGTAATTAAAC	hypothetical protein	SA0986	COL	1
GTAGTTTCTTATTTGTCGGCCCTACTGGTGTTGGTAAAACAGAGCTTGCTAAACAATTAGCAATTGATCT	ATP-dependent Clp proteinase chain clpL	SA2336	N315	0	1
GTATATAAAAAATGCTTCTGCAATAGATGCAATAAACATGCAATACAATATGGAGGCGAAGTAAATGAAA	hypothetical protein	SA2595	COL	0	1
GTATATAAACTTGTAGCTATTGAAAATGAAGAGGGTTCATATAGTGATCGTATTAAATTATCAAATAACG	ORFID:SA1729~nicotinate phosphoribosyltransferase homolog	SA1729	N315	1
GTATATATTGATGAGTTAAAAGTACAATATGCACAAAATGATGAGTCACCTTTAGTTAATGAATTTTCAG	conserved hypothetical protein	MW1785	MW2	1
GTATATTACGAAAATAAAATAAAGCATCCACTTGTTGATTTTTCAATTTTTAAAAATAGAGGATACAGTG	drug transporter, putative	SA2449	COL	1
GTATCAGACATGAACCCTTATATCGTTGCATCACTCGTAGGTTTACTATGTATTTTATATACATTTTTAG	ORFID:SA0303~hypothetical protein, similar to sodium-coupled permease	SA0303	N315	1
GTATCATACAAAGCATTTGTATTAGTTTTCATTTTAATGAGTTTTATTATTGCTAACCAAGGTTTAAATG	branched-chain amino acid transport system II carrier protein	SA1443	COL	1
GTATCATCCTCCGTAAATTTACAGTTTATACACATTGACAGTAAGTTGATTTTACAAGCTTTATTCAATT	sensor protein KdpD	SA1882	N315	1
GTATCTAGTTTATTAGGTATGTTAGGTATAAGTATTGTTACAATTAATGGTGTTGATCAAGGTAAACGAG	ACT domain protein	SA1300	COL	1
GTATCTATGGCATTGCTAACAATACTAATTTTATGTGCGGACTTTTTAGCTAATAAATATTTTGTGAATC	conserved hypothetical protein	SA0629	N315	1
GTATGAAACTAATCCAATTAATCACTTCTACTATACTCGTATCTATGGCAATCAGTTTAGTAGGTAACAT	iron compound ABC transporter, permease protein SirC	SA0097	COL	0	1
GTATGATTGCTGGGTCATATGCTGGGGCTCATTTTGCTATTAAACAAGGTGTTGGTTATGTAAAAGTATT	conserved hypothetical protein	SA1763	COL	0	1
GTATGGTTATATTAGGCATTTATGTCGCAATAACTAAAGATTTCACACTAATTTCTTATATAAATCAAAC	hypothetical protein	SA2281	N315	1
GTATGTGGACGATATATACAGATTTTGCCAAAAGTAATAAAGCAGACGAATTAAGTAATGAAGGTATGGT	hypothetical protein	MW0401	MW2	0	1
GTATTAAAAAATAATAAACAATTCGATAAAGAAATCGAACAAAATATTCAAACATTAAAAGAACGCTATG	aminotransferase, putative	SA2000	COL	1
GTATTAATAAAAAAGATATTCGCACAATCATTCACTTTCATCTTTCAACAAGTCCTTCTAACTACATTCA	probable ATP-dependent DNA helicase RecQ	SA1313	N315	1
GTATTAGCTGGTGTGGCTGTTGGGGCAGCACTTGTTTGGTTGGTTCCATGGGTATACAACCTTTTCCAAT	traB protein	VRA0009	Michigan	0	1
GTATTATCTTATTCTTACTACGATTATCGTGTTCTTCTGTATATTCCTTATTTTTAGTCCTATTGGAAAA	osmoprotectant transporter, BCCT family	SA1384	COL	1
GTATTATTCAAATATTAAATGAATTAGAAGAATATTTACAAATCAAATCGCAATTTGGTTCATTGAAAAT	conserved hypothetical protein	SA1557	COL	1
GTATTATTTTCTTTAGTGGATCATTATATATTTTAGTATTAACTCAAATTAAAGTTTTAGGTGCGATTAC	conserved hypothetical protein	SA0629	COL	1
GTATTCAAAATCCTTCTTTAGTTGAAAAACTAAATCAGTATGAATCTTCGTTAATTCAAAAAGTGGAGGA	phosphoribosylaminoimidazole carboxylase, catalytic subunit	SA1073	COL	1
GTATTCTGTCTTGTATATTAACTGTATTTTTGACATCTCTCTATATTAAGCATAAAGGTTATCGGAAAGG	hypothetical protein	SA2497	N315	1
GTATTGGGTTTGTTTACTCTGAAAATTATTTTAATGAGAGATGGACTACGAAGCAACTTGAAAAAATGAT	ORFID:SA1747~hypothetical protein, similar to ABC transporter, ATP-binding	SA1747	N315	1
GTATTGTTAACTTTTGTAACGACCATACATGATACCGATGATGGTCGTTTTTTTAATGAACACAAACATG	hypothetical protein	MW1019	MW2	0	1
GTATTGTTATCTTATAGCTGCAGTTGTATTTTTAGTTTTCTATATCAATTTATATCTATAGAAGAAACGT	ORFID:SA1486~hypothetical protein, similar to type IV prepilin	SA1486	N315	1
GTATTTAAAGTTTTTTATCAACATAACAGAGACGAGGTAATTGTGCGTGAAAATACACAATCACTTTATG	conserved hypothetical protein	SA1099	COL	0	1
GTATTTAGTTCATCACCTATCCCAGGTAATACAAAAAGTATTAACAGAACTATTAATTCCTTGTATAAAG	metallo-beta-lactamase family protein	SA1098	COL	1
GTCAAAATATAGAATTCAGTAAGAAATTACAAGAATTGAATGTACCAGTAGATACTTTGTTTTATGATGG	lipase/esterase	SA0712	COL	0	1
GTCAAGATTTAATCAATGGTGAGTTGCAAAAAGCGAATGATGCTTTAGGCTATATTTATTCTATTAAAGG	riboflavin kinase / FAD synthase ribC	SA1115	N315	1
GTCAATATAGACTTAAAATCGTATTAAATGCTGAAAGCAAATTTGAAACGATAGTGTCACCTTTACCTGA	para-aminobenzoate synthase, component I, putative, authentic frameshift	SA0774	COL	1
GTCCCAACACAGAAGATGACGAAAAGTCAGCTTACAATAATGTGCAAGTTTGGGATGGGCCCCAACAAAG	hypothetical protein	SA1469	COL	0	1
GTCCTTATATATATTTAAATAATGAAGAACTTGCCAATATCAATCCAAAAGTTATGATTTTAGCCACTGA	iron compound ABC transporter, iron compound-binding protein	SA1045	COL	1
GTCCTTTAGCTTCAAATGAGTTAGGAAAATTAGCAGTTAATGAAATGTTAAATGCAATACAAAATAAATA	conserved hypothetical protein	SA0597	COL	1
GTCGTATGTTTCCAGTTTCCAATAAGGCACAAGACGTCGTTGATACTTTAGTGACAACTATAGAAAATCA	putative exported protein	SAR1840	MRSA252	0	1
GTCGTATTTAAGCTTCAAGCTATGGATACAATGACAAGTTTCTGGATTCCACAATTAGGTGGTCAAAAAT	ORFID:SA0913~hypothetical protein, similar to quinol oxidase polypeptide	SA0913	N315	1
GTCTAATTACACAGATCATCAATTAATTGAAACTACAAATAGAGCTATTAGCTTATATATGGCAAATTAA	hypothetical protein	SA0867	COL	1
GTCTACAATTAAAAATCAACCAGTGACATCTGAAACACCGGAAAAAGCGTGTACATCTGAAACACCGAAA	hypothetical protein	SA2338	COL	0	1
GTCTGATACGAATTGTTATGGGAACTACACTATTAACACATGCAGCAAACTTATTTTTAATAACTATGGG	Na1/H1 antiporter subunit	SA0811	N315	1
GTCTGTAGAATTTCTTTTTGAATTTCTCTATGTTGGGGCCCCGCCAACTTGCATTGTCTGTAGAATTTCT	hypothetical protein	SAS036	N315	0	1
GTCTTCTATTTCAATTACCAATATTATTTATGGGTCTTGCAAAATTCGGTCTTATAGATACCACATCATT	MttB family protein	SA0417	COL	0	1
GTGAAAACTATTATATGTATAAAAAGTTTGGTGTTTTACCAGAAATGGAATACGAAATTAATAAAGTTAA	conserved hypothetical protein	SAS0278	MSSA476	0	1
GTGACACATATAAAAGTTACCTAGTAGCAGTACTGTGCTTCACGGTCTTAGCGATTGTACTCATGCCGTT	hypothetical protein	MW1430	MW2	0	1
GTGAGTTACTAAAACCAGCGCATCAATTAAAATCACCTGACGAAATCAAAGAAGAATTAGACAAAAAAGA	hypothetical protein	SA2263	N315	0	1
GTGATACTAATTCAATTATTTATGGCATTTATTATTGGGGTTTTAGCTGCTCATCAATTTAAATTTAATG	ORFID:SA1676~hypothetical protein, similar to regulatory protein (pfoS/R)	SA1676	N315	1
GTGATAGAGGCGAAATTAAAGTCAATGCTCAACTTCAAACATCTGTGCCACATATTTATGCTGCAGGTGA	ORFID:SA0551~mercuric reductase homologue	SA0551	N315	0	1
GTGATATAGTGGAATTTGAAGTACAAAACATTAACGAAGGCTATATTCATCAAGTGTTTGAGCGGAAAAA	conserved hypothetical protein	SA1064	N315	1
GTGATTATGAAACGCTAGTTGATTCTATTCAAGATAAAATATTTGAATTAGAAGGCGATTTACCTTTATT	metallo-beta-lactamase family protein	SA1602	COL	1
GTGATTTCACATTGCCAATGTCTGTATTTGATGATTTATATGAAGAATATACGGAATGGCTAAAATTTTA	conserved hypothetical protein	SA1456	COL	1
GTGCACTTATACCCATCTATTAATATTGACAGGGTAAATGAACTATACCAGTTATGTGATATTTATCTTG	hypothetical protein	SA2440	N315	1
GTGGATCTAATCATTTAGGTGGTTTAGAGGGTGGTATGTCAAATGGTATGCCAATTATTGTAAATGGTGT	chorismate synthase	SA1299	N315	0	1
GTGTTCATTTAAACAAACTTACTGAAGAACGAAGCAAGCGATTGGAAAAAACACGCAAAGCTTTAGAAGA	universal stress protein family	SA1753	COL	1
GTGTTTTTTGATGGCAATCGATCAGTGTCAAGAGATATTTTCTTTGAAAAAGCACTTAAAGTGATACGTC	urease accessory protein UreD	SAR2378	MRSA252	0	0
GTTAAAAAAGCCACAAAATTTGCAGTTGCTAACCTTATTATCGTGTCAACAGTTTTCAGTTCTGTCACAC	alkaline phosphatase III precursor	SA2420	N315	1
GTTAAAACAAATACTGCCACGTGCTACAAAAATATCGATACTCTTTGCTGTAGCATTTTTCATCATAAAT	hypothetical protein	SA2110	N315	1
GTTAAAACATTTGATGATTCGTTAAAAAGATTATTACAAGATTTAGAAGATACAATGTATGCACAAGAAG	polypeptide deformylase	SA1227	COL	1
GTTAAACAGTCTTAGATTTGGAGAATTAGATAATAAACAAAACCAAAGATTACTTAAAGGGGTTGTAAAG	phosphoribosylformylglycinamidine synthetase PurL	SA0921	N315	1
GTTAAATGATATGAATATCATTCCAGGCTATTATGGCGTAAATAGTATAGATCTGATGAATGATTTATAC	ORFID:SA0969~hypothetical protein, similar to glycerophosphoryl diester pho	SA0969	N315	1
GTTACGATCAGACCAAATTAAAAAACTATATACAGATTTATCGGATGATTTATATCAATCAAAGCTAGGG	glutamate synthase large subunit	SA0430	N315	1
GTTACGGGTCAACGGGGCAATCATCGGTCAAACAACAACTTGATGTTGCTAAACAATTACTATCACAATA	argininosuccinate lyase	SA0821	N315	1
GTTACTGAAAATGACAACGCTAATCAGTCACATTCAGTATCGTTAAATGCCACACAAGCAGTTGATGAAA	hypothetical protein	SAR0453	MRSA252	0	1
GTTAGATGAGAATTGTGACTGTTATACATGTCAAAACTATTCAAGAGCGTATATACGTCATTTAATCAAG	queuine tRNA-ribosyltransferase	SA1694	COL	1
GTTAGATTTACATGGTGCGTTTTGGGCATTCATTGGTTCGATCGAATTTGATTATTTAGGCTATATTTTA	high-affinity nickel-transport protein	SA2721	COL	0	1
GTTAGCTAATAATATGAATATTCAATTGATATTAACAATACCTATGGTCTTTGGTTTAATTGCAATTATG	polysaccharide extrusion protein	SA0117	COL	1
GTTATACAAACGATGTAGTTAAAAATTTTACAGCGAATGGTTTATTAAGTATTGGTGCGAGCCCTGCCAT	hydroxyethyl thiazole kinase	SA1895	N315	1
GTTATATATCTTGGATTATTGTGGTAGGTATTTCATTAATTCTTGTCGTAATTGTTAGTATTTTCTTATG	transporter, CorA family	SA2375	COL	1
GTTATGTTTCAAGTCATCATGAAGTGTTTAAAGAAGCGAATAAGACTATTGTAAATAAACATTTATACTA	pyridine nucleotide-disulfide oxidoreductase	SA2369	COL	1
GTTATTACAATATTAGTATTGTTGATTGCTGTTATATTAATTTACATGTTTTCACCACTTAGTAAAATTG	ORFID:SA1027~cell division protein, FtsQ homolog	SA1027	N315	1
GTTATTACGATTGATAAAGAAAAAGAACAAGTATTTGAAGATATTTATCAATTTTTAGAGTCATTAGACT	ORFID:SA0734~carboxyesterase precursor homologue	SA0734	N315	1
GTTATTTGAAAATGATTTCATCTGCTAAAAAATCGATTTATATTCAATCTCCCTATTTTATACCTGATCA	hypothetical protein, similar to cardiolipin synthetase	MW2011	MW2	1
GTTCGTCGTAATGACGGTTCATACATCAAATTTGATGAAAATGCATGTGTTATCATCCGTGATGACAAAG	ribosomal protein L14	SA2229	COL	1
GTTGAAAAATTAGGCGGTATCGTAGTAGGTATTGCATTTATAATTGAATTGAAATATTTAAATGGTATTG	adenine phosphoribosyltransferase	SA1690	COL	1
GTTGATTATTATTCCTTACTTACTATTTAAATCGAATACACTAAATATTATTCATACGGGTGATAATATT	iron compound ABC transporter, permease protein	SA0706	COL	1
GTTGCAGCAAATGCACAAAATAATGCATCAAATACATCAGACAATAATCAACAATCCAATGATTCAGAAA	hypothetical protein, similar to cell-divisio initiation protein	MW1075	MW2	0	1
GTTGGCAATTGGCGGGACAAGTTCTTTAAAGAGCGTGAAGGTAAATATCAAGTAGAAGTAAAAGAAGCAT	hypothetical protein	SA1344	COL	0	1
GTTGTAAAACATGGACCATTACGAGTTGAACTAGGTTCATGGAAAGCGCCTTACAGTATTGTCTTTGTTT	Na1/H1 antiporter subunit	SAR0911	MRSA252	0	1
GTTGTATTTTATATTAAAAGATGAAAATATAGTAGAAATTCAACTACTTGTCACAATGAGTTATCAATAT	conserved hypothetical protein	SA0692	COL	1
GTTGTCCAAATTGCCAATCTCGGTTTAACAATCGCTGTAAATATCACTATCATATTTATTTTGAAATTTA	conserved hypothetical protein	SA0800	COL	1
GTTTATTAACTTTTTAAATCAAATGACTGCTGGAAATTTCGATTTGACTGAAGAAACTCCAAAGCAGTTA	conserved hypothetical protein	SA0703	N315	1
GTTTATTGATTATCCGTTATTAGTTACATATATTGTATTGAGTTTAATTGGATTAGTGATGGTATATAGT	cell division protein,FtsW/RodA/SpoVE family	SA1122	COL	0	1
GTTTCAAATTATTAGTGGTGAGCAGGACATTAAAGATGCTTTAACTCAATTTGAAATTGAAAAGGATTAA	conserved hypothetical protein	SA1946	N315	1
GTTTTAGTAGATGGTCTATTTATACAACACTTATTCAAACCTGATTTACCATATAAAGGTTCTTTAAATC	anaerobic ribonucleoside-triphosphate reductase activating protein	SA2634	COL	1
GTTTTGTTTAAATATGTTGAAAATATTTTAAATAAAGATAAAGACCAATTATCTGTAGATAAATTAAGAG	riboflavin synthase, alpha subunit	SA1819	COL	1
TAAAAAAACTAAATCTCGTTTAGACATTATTAATACTTTGCCAGCATCTAATAAAGTAAGTCACGAATTA	conserved hypothetical protein	SA2076	COL	1
TAAAAAACCAGATATGCTTGAAAGTGAAAAAGAAGAAGCGTTAAAGCCATTTATTTTACTTGTTGTAGAT	hypothetical protein	SA1943	N315	1
TAAAAAAGAAAGTGACTTTGAATTCACAAAAAATCATAAAAGGTTATTATTAGGTTCTGTATTTTTGATG	conserved hypothetical protein	SA1659	COL	0	0
TAAAAAGTACAAGTAGTCAAAATAGCGACGGCACAATTAAGCGTGTCATGCGTCTAATTGATAATATTCG	oxoglutarate dehydrogenase	SAV1413	Mu50	0	1
TAAAAATAGCGATAATGAACAAGTTAAAAATGTAAAAGATAAGATAAATGAATATACAGGATCGAATAAC	conserved hypothetical protein	SA1679	COL	1
TAAAAATGCAGTATTACCAATATTGACAGCATCTTTATTAGCTTCTGATAAACCGAGTAAATTAGTTAAT	UDP-N-acetylglucosamine 1-carboxyvinyl transferase 1	SA1902	N315	1
TAAAAATGTAATGGTTAAAGGTTTAACTGCTTTAACTATTTTAACTATTTTAACATCTCTTGGTTTTGCT	serine protease SplA	SA1869	COL	0	0
TAAAACATGCTGATATTGATTTAGAAGCTAAAAATGCAGTTGTAATTGGACGAAGTCATATTGTCGGACA	FolD bifunctional protein	SA0915	N315	1
TAAAACGTAACGTTGATCAAGTAGAAGTAGGTAAAACAGCGGCTTACTTATTAAGTGACTTATCAAGTGG	trans-2-enoyl-ACP reductase	SA0869	N315	1
TAAAACTGAAAATATCGTTTATATCGGTTCTTCATTCCATAATAACGCTTTATTACGCAAAGTTGTGGAA	ORFID:SA1932~hypothetical protein, similar to hypothetical protein T13D8.31	SA1932	N315	1
TAAAAGAAAAACTTTTAACACTAGAATATGTTAGAAACGAATTGAATGATTATAAAGCTTCAATGAGATA	capsular polysaccharide biosynthesis protein Cap5E	SA0140	COL	0	1
TAAAAGCTAACGAAGAATCTAAAAAGTTATTCGATGAGTTCCGTGAAACTCAAATTAACTTCCAACAAAA	conserved hypothetical protein	SA1663	N315	1
TAAAAGTATCGGCATTTATATAATATTTATGTTATTTGGCGGAATTTTGAATAGGTTATCAAGAATCGTA	hypothetical protein	SA2331	COL	0	1
TAAAATCGACACCCAAACTTTATTAGATTTTTTAGCAGAACTTGCTAATAAATATGATGTTCAATATTTA	conserved hypothetical protein	SA2377	COL	0	1
TAAAATGAATTCATTGAATATCCATCAAGAAATTATTGATGAAATGTCAGATATCATTTTAATGTTATAT	DNA repair protein RecO family	SA1623	COL	1
TAAAATTACCGATACACGTTAAAATTACTAATTTTATACGTACGAATGATCTTGAACAAATTGAACGGAC	ORFID:SA0116~hypothetical protein, similar to rhizobactin siderophore biosy	SA0116	N315	1
TAAACCAAGAATACAGCGATGCTTACTTAAGTTTAATAACAAGTAACATGGAAGGTTTCTCTTTAGCGCT	ORFID:SA0523~hypothetical protein, similar to poly (glycerol-phosphate) alp	SA0523	N315	1
TAAACTATTACAGTCATTATCAGCCCTCGGTGTTTCTGCTACACTAGTAACACCAAATTTAAATGCAGAT	chitinase-related protein	SA1071	COL	1
TAAAGAAGAAGCGAAAGAGAAGTACGAGGCACAATTTAAAAGAGGTGCAGTTATTAAATTAGGGCAGTTG	hypothetical protein	SAV1972	Mu50	0	1
TAAAGAATTAGATGGAGATATTATACCGCCTAACAATTTTGTTGTGCTAAATGATCATGATAACAATCAG	type-I signal peptidase	SA0825	N315	0	1
TAAAGACATGAATTATACATTGCAAACAGAAATTGAATATGTACGTGAAAACTACTATATAAATGAATCT	conserved hypothetical protein	SA1767	COL	1
TAAAGACGAATCAGTTGAAAAAAACACTGAATCAACAGTTGAAGAAACAAACATCAAACAAAATATTGAT	GrpE protein	SA1410	N315	1
TAAAGATAATCACAAAAAGCCTACATCAACAGATAAAGATCAAAAAGCTAATGACAAACACCAATCATAA	conserved hypothetical protein	SA0632	N315	1
TAAAGATTTAAAAGAACAAGATTTAGTTATCAAGATTGAAGATCATGTTCATTCTGTAGGTCATTCAGAA	valyl-tRNA synthetase	SA1710	COL	1
TAAAGCTGAAGTCATGATGTTAATTAATAAATTGAACATCCATCATACACCTCCTCTCTGCGTTAAAGTA	hypothetical protein	SA2218	N315	0	1
TAAAGGTACTAATTTTAAGCGATTATTAAAATCACTGTCTCCTTATGTCAAAGTAAAAAATGATGTAAAC	ROK family protein	SA0313	COL	1
TAAAGGTTATGCTAAAACGATTGATGAAGAACAATTAACAGCACAAATTTTATTACAAGAACTAAATGAA	undecaprenyl-PP-MurNAc-pentapeptide-UDPGlcNAc GlcNAc transferase	SA1251	N315	1
TAAAGGTTTTGTTGAAGGTAAATACGATGGTGGTAGACACCAAATCCGTGTAGATATGCTTAATAAAATG	galactose-6-phosphate isomerase LacA subunit	MW2121	MW2	1
TAAAGTACTTAAATATATTGGTATGGTAAATATGTATTATTTAAGTTCACTTTTATTTGGCATTGCTTTG	ORFID:SA1982~hypothetical protein, similar to transporter	SA1982	N315	1
TAAAGTTATCATTATATTATTTATTTCATTAATTGTTGCAGTAGCATTTTTCTTTGGTCTGAAAACATAT	conserved hypothetical protein	SA2383	COL	1
TAAATACAACTTTGTTACTAATAACGATAAATCGATTAATAGCGAGCTCATTAATTTCATTATTAATTAT	acetyltransferase, putative	SA0871	COL	1
TAAATACATTTACAAATGGTCTAGGTAATTATATTGCAAATTTCTTTAGTATGAGTTTACGTATTCCGTC	ORFID:SA1987~glycine betaine transporter opuD homolog	SA1987	N315	1
TAAATAGATTAACAATTATTTTATCAATATTATTTTTTGTACTTATGATTTGCATAAGTTATCTTGGTAT	preprotein translocase, SecG subunit	SA0844	COL	1
TAAATATGGAATTACAAATAAGTTGGTATTATATGTACCAACATATAGAGAAGATAAAGCAGATAATAGG	teichoic acid biosynthesis protein B	SA0696	COL	0	1
TAAATGGCTTTGTTTTTTCAATATTAGGATTTTTAGTACCTGAAGTTATTATTAAAATTATCAAAACAGA	Na1/H1 antiporter, putative	SA0687	COL	1
TAAATTAATCAATAAGTATAAAGATGAAATTAAATTTGATAGAAATCAAAAAGTGCTTCCAGCAGTAGTT	iron compound ABC transporter, iron compound-binding protein	SA2167	COL	1
TAAATTAGCCAAAGCAAGAGCAGAGTCTCACTTGGAAAATGATGACGACAATACTGATATTCATAGAGCC	ATP synthase F1, epsilon subunit	SA2094	COL	1
TAAATTGTTATATAGGCATATGGGACCGCAAAATTGGTGGCCTGCTGATAATGACATTGAACTGATGTTA	ORFID:SA0565~hypothetical protein, similar to endonuclease III	SA0565	N315	0	1
TAAATTTTAAAATTAATGCACTATTGATTAAAAGTAAAAGTGATTACATTTCATTGGGACTTATTAGTCA	probable ATP-dependent DNA helicase dinG	SA1288	N315	1
TAACCAAATTAAACAAATTATACCTCACAGACAGCCATTTTTATTAATTGATAAAGTAGTTGAATATGAA	beta-hydroxyacyl-(acyl-carrier-protein) dehydratase FabZ	SA2091	COL	1
TAACCCTATATGGTTGAATCATGTTGATTATTTGGTTAAAAGTGTATTATTAAAAAGTATAAAATTAAGA	hypothetical protein	SAS034	N315	0	1
TAACCTTTTTAAATGAGGTTGTATGGAGTAAGCCATTAGTTTATGGTTTGCTAATTACTGGTGTGCTATT	hypothetical protein, similar to Na1/H1-dependent alanine carrier protein	MW0894	MW2	0	1
TAACGCTGAATATAAAGCAACTGAAGAGAACAAAAAATTAATCGCTAAAATTAAACATTTAGAAACAAGC	galactose-6-phosphate isomerase LacB subunit	SA1996	N315	1
TAACGTTCCAAGAGAATTACTAGATAACAATATACCTATGGGAAGAGGCATGATTAAATGGGCTCCTTTT	conserved hypothetical protein	SA1986	COL	1
TAACTATATACCGAAAAGTTTTGAATCAGGCATTTATGTTTTTAGTGAATCCCAAGTTCCAGGAACAGAT	Phe-tRNA synthetase beta chain	SA0986	N315	1
TAACTATTTATATTGCGACTGGCGAGTGGCGCGTGCCTCAACATATGTCTAATTCGACATGGTCATTGTT	NADH dehydrogenase subunit 5	MW0407	MW2	0	1
TAACTCAATTATTATTTTAGGTGTATTAGCCATTATTTTAATTATTGTATTTGATGGTATGACTGAAGAT	conserved hypothetical protein	SA2229	N315	1
TAACTGTTTTTGAAAGAAGTAAAGAAACAGGTAAAATTACTCTATGTGATAATACTCGTGTAGCATCTGA	conserved hypothetical protein	SA1737	N315	1
TAACTTAAATAGTACTAGCGTTTATTCAGTAATTGAAAATCATTTTGTCTTTCATTCATTAAATCAAATC	transcriptional antiterminator, BglG family/DNA-binding protein	SA2147	COL	1
TAACTTATCAGGTACAGCTGAAAAGCCACGTTTAAACGTATATCGTTCAAACAAGCATATCTACGCTCAA	ribosomal protein L18	SA2223	COL	1
TAACTTTAATCATAACGAAAAAGGTAGGAAGAAAACAAAAATTTATACTCAACATCGCAAATATTTTAAG	hypothetical protein	SA1983	COL	0	1
TAACTTTTTCAGAGCAAAATACACTCGCGAAAATAGATGATTTAATGAATACTTATTGCAATCAATGTCC	conserved hypothetical protein	SA1264	N315	0	1
TAAGAAGTGACATCGTTGCTTTTATTTTTAATGTTACATTTGAAGCATTAAGTTCATCATGCACTGTAGT	hypothetical protein	SA0223	COL	0	1
TAAGAATTTCTGTAGGTATTGAAGATACTGAAGATTTAGTCGATGATTTAAAACAAGCACTAGATACGCT	cystathionine gamma-synthase homolog	SAV0461	Mu50	1
TAAGACAAAGAAAAGATTTTAAAGTAATTGAAGAACGAGATTATATTCGTAACACTAAAGAAAGTGGTTA	GTP pyrophosphokinase	SA1010	COL	1
TAAGCCTATTTTAGATTTCTATGATCAAAAAGGTGTATTGAAAAATATTGATGGTTCAAAAGATATTAGC	adenylate kinase	SA2218	COL	1
TAAGCTGTTAGAGTTGGAGAATATCGATATGTCAAAGCTTTATATACCTAAACACAGTACAAAGCCGTAA	probable methylated DNA-protein cysteine methyltransferase	SA2335	N315	0	1
TAAGTAATATCATTACATTAGATGATATTAATGGTGATATTCATATGCATACAACGTATAGTGATGGTGC	DNA-dependent DNA polymerase beta chain	SA0990	N315	1
TAAGTACATGTGCCATTGTAATCAAAGAAGATAAGCAGCATTATACATATACACATGAGTTAGGCGAAAT	ORFID:SA1266~hypothetical protein, similar to cell wall enzyme	SA1266	N315	1
TAAGTATAAAGATTCACGTGAACAATTCGAACAACGTACACACAAACGTTTAATCGATATTGTAAACCCA	30S ribosomal protein S10	SA2048	N315	0	1
TAAGTATTGGTGTTTTGGGGTTTGGAGATGTAGTCGGAGGTTTGGAGGATTTGAGCGATTTGGGTATGGA	hypothetical protein	SAR0419	MRSA252	0	1
TAAGTTATATACAATTATGGGATATGTAGGCTTATTTATTGTAGTAGCTGTAATTATTAAATATTTCAAA	conserved hypothetical protein	SA0711	COL	1
TAATAAATATATAAATACAAAAAGACCTAACTATAGTAAGAAGGAAGTAATAGAAGTAGGTGTATTTAAT	hypothetical protein	SA1317	N315	0	0
TAATAATCCATATGCCTATGTGATTCAAGCACTTAGAAAAACATTGAAATTATGTTTGACATCACCAAAA	ORFID:SA2183~hypothetical protein, similar to nitrate reductase delta	SA2183	N315	1
TAATAATCCTGAATTAGAACGTTCATTAAAAGATGCGAAAGAAACATTTGTTAATAGAAAAAATCAACGC	hypothetical protein	MW1822	MW2	1
TAATAATGCGCAAACTGCAACTTATACACTTACTTTGAATGATGGTAATAAAAAAGTAGTGAATCTAAAG	hypothetical protein, similar to MHC class II analog	MW2130	MW2	1
TAATAATGGTGTAGCAACTAAAGCGGGTAAAGATCCTAAAAATGATCCGATATTTTTAGAAAAATCAAAT	ORFID:SA0422~hypothetical protein, similar to lactococcal lipoprotein	SA0422	N315	0	1
TAATAATTTGGTGGTAACAATTTATCATCAAGATAAGAAAGTCTATCAAAATATTATTAAATTTGCGCGA	conserved hypothetical protein	SA2710	COL	1
TAATAGTGATTCTAAAATTTTAGTTGTAGGTGCTGAAAAAGATAAAGTCGGCGAAGCATTCAATGTTCAA	manganese-dependent inorganic pyrophosphatase	SA1735	N315	1
TAATATCACTATTAACTTTCATTTCAGTTGAAATACTATATAATAAAAGTAACAAAAAGTACGGAGGTAA	conserved hypothetical protein	SA2052	N315	0	1
TAATATTAGAAGAACTTTCGCACAAAGATTTTTTGACTTTACAAGAATTAATAGATCGAACTGGTTGCAG	ORFID:SA0653~hypothetical protein, similar to transcription repressor of	SA0653	N315	1
TAATATTAGATGGTAATCAAATTGAAGGTAAGAAAGTTACAGTAGATCATGATGGTAAAGAGTTTAAATA	ATP-dependent Clp protease, ATP-binding subunit ClpC, authentic frameshift	SA0570	COL	0	1
TAATATTATTTCAAAATTGCAACACTATTCAATTGAGGCGAAACCAGGTATATGTATTATTGGGGAAGTT	tetrapyrrole (corrin/porphyrin) methylase family protein	SAS2289	MSSA476	0	1
TAATATTTATAAACCACATTCTGGCTTTACATTAGAAACACAATTTTTACCAAATGATATTAATTTATAT	aldose 1-epimerase	SA2332	COL	1
TAATATTTCTAAAATTCTCGATTTTCAAATATCAGAAAACAAACCTATAATTGGTGAAAATATATTTAAA	isopropylmalate synthase-related protein	SA0981	COL	1
TAATATTTCTTTAGCTTTATCTGATTTTAAGAATTCCATCCACTCTTTTGCTAATTTACTATCTGATGTA	probable molybdate-binding protein	SAV2279	Mu50	1
TAATATTTTTGAAATTTCAAAAGATATAACAATTGAAGAAAAAGGTCATATTAAATTAACTGATGAACTT	conserved hypothetical protein	SA1792	COL	1
TAATCAAAGCTCAAGCCCAGCAGCGATGTTTGTATTAGTAGCAGGTATAGGTTTAATCGCGACTGTACGA	ORFID:SA0022~hypothetical protein, similar to 5-nucleotidase	SA0022	N315	0	1
TAATCATCATTATGATGAATCTGGTGAAGAGATTAAAGCAAGTAACAAATCATTCTGGGGAACTGTGTTG	toxic anion resistance protein homologue	MW0902	MW2	1
TAATCATTGGTGACCGTCAAACAGGTAAAACAACAATTGCAATTGACACAATTTTGAACCAAAAAGATCA	ATP synthase alpha chain	SA1907	N315	1
TAATCGTTATTATAGGTTCGGTTGCATTAGCGATTTATATGCTTGTTGTTTCTATCAAACGTAAAAGTAC	hypothetical protein	SA0732	N315	1
TAATCTTTAATTTCACTCATTTACTTTTCAATCTTTTAAAAGCGAGGTTTTTAATAATGACAAAAATTAT	D-specific D-2-hydroxyacid dehydrogenase	SA2312	N315	0	1
TAATGACACAGAGGGGTTGCTAAAAGAGATTGAGGACGTGTATAAGAAAGCGCAAGCGTTTGATGAAATA	conserved hypothetical protein	SA0356	COL	0	1
TAATGATTTTTTCTAGTCAAAAAACGACTTATTTTGGTTATATGAATAGTAAAACAAATGCAGAAAAAGT	hypothetical protein	SA1276	N315	1
TAATGCAATTGAGGAAATGGCAAAGGAACACAATATTAAAGTAGATATTAAACAAATCAAAATTACAGAA	ORFID:SA0237~hypothetical protein, similar to PTS, galactitol-specific IIB	SA0237	N315	1
TAATGCATCAACTGGTATCATCACTTATTTATGAGAATATTGTTGTGTATAAAGCGTCATATCAAGACGG	ORFID:SA0117~hypothetical protein, similar to rhizobactin siderophore biosy	SA0117	N315	1
TAATGGTAAAATCGACACCCAAACTTTATTAGATTTTTTAGGTTCTCCACCAAATGTGGTGGGTATATAA	probable type II DNA modification enzyme	SAV2378	Mu50	0	1
TAATGTCTTTATACCTAACACACCTTTACATGATGGTGCAATGATTATTCAAGGCACTAAGATTGCAGCA	conserved hypothetoical protein	SA1967	N315	1
TAATGTTAAAGAAACAGTAGGTAATGTTACTGATAATAAAAATTTAGAAAACGAAGGTAAAGAAGATAAA	conserved hypothetical protein	SA0912	COL	1
TAATTAAATATCTTGAAGATGTGTCAGATGAAGATATCATTAATTATGAAATTAAAACAGGTGCACCGCT	ORFID:SA2204~phosphoglycerate mutase, pgm homolog	SA2204	N315	1
TAATTATGAAAATCAAGAAGGTCGTCGTGTGTTTGTTACTGAAGTTGTGTGTGATAGTGTTCAATTCCTT	single-strand DNA-binding protein of phage phi Sa 2mw	MW0342	MW2	1
TAATTATGAACCAGAATCAGTGATGGGTTCAACATTCCATAAATTAAATAAGCAGCATGATGCGGCAAAC	ORFID:SA0210~hypothetical protein, similar to NADH-dependent dehydrogenase	SA0210	N315	1
TAATTATTCTGTGTTTAATAAATTAGCAGCACAATTAGCAAAATCATTTCAAGTTGTGTTAATTGATTTA	ORFID:SA0569~hypothetical protein similar to 2-hydroxy-6-oxo-6-phenylhexa-2	SA0569	N315	1
TAATTCCAGGTTTAGAGAATGTTGATATTGTTAGATATGGTGTGATGCATAGAAATACCTTCATTAACTC	glucose-inhibited division protein gid	SA1094	N315	1
TAATTGAATTATTTGATAATACTAATCAAAGTTCTTCAAGTATGCGCGAGATTGATATACCTTTTGAACC	ORFID:SA2092~hypothetical protein, similar to transcription regulator	SA2092	N315	1
TAATTGCTTATGAGCCAATCTGGGCAATCGGAACTGGTAAATCATCAACATCTGAAGATGCAAATGAAAT	triosephosphate isomerase	SA0729	N315	1
TAATTGGAAGATTAGCAAGTGAACTTGGCACTGCTATGAAAGGTTTAGATATCAATCAATTATCATTAGA	pyridoxine biosynthesis protein	SA0564	COL	1
TAATTGGTTTCGGTAACTTTGAGGTACGTGAACGTGCTGCACGTAAAGGTCGTAACCCTCAAACTGGTAA	DNA-binding protein HU	SA1513	COL	1
TAATTTAAAACATCTTTCTCCCAATACTTTAATGAGTGATATTGTTTATATACCGTATAAAACACCTATT	shikimate dehydrogenease	SA1424	N315	1
TAATTTAGGTCGTAAATCTTTAGAAGAAGTTAAATACAAATTAGAAGATTTAGGATTAGGATTAAGAAAA	DNA-directed RNA polymerase, alpha subunit	SA2213	COL	1
TAATTTATGCAGTCATTGTATTACTATTAAATATTTTCTATTCTGATTTGAAAATAACAATGACATTATT	conserved hypothetical protein	SA0749	COL	1
TAATTTTATGTATCGGTATCGTAGCTGTATTAAATTCTGTTAAGAAAAACTTAGATTATGTTGCAAAAAC	conserved hypothetical protein	SA1789	COL	1
TAATTTTCCATATAATGGCGTCGTTTCATTTAAGGATGCGACAGGTTTTGTAATTGGAAAAAATACAATT	serine protease SplC	SA1629	N315	0	1
TAATTTTTTAGAAAATGTTGAACAATTTAACGATGTACGTAACATGTTTGGTTACACTGGTACATATAAA	purine nucleoside phosphorylase	SA2130	COL	1
TACAAAACCAATATGAAGAATTACAAAAATTAGGCGTAAATGTATTCTCAGTATCAACTGATACTCACTT	alkyl hydroperoxide reductase, C subunit	SA0452	COL	1
TACAAAATCTATTATAGCTATTATTAGCTTATGTATACTTACATATACAACAATGATTGGTAGCGTGTTG	conserved hypothetical protein	SA0979	N315	1
TACAAAATGGTGTCGTATGATTATTAGACAGATTTTGTCAAACGCATTGAAATATAGTGAGAATTTTAAT	ORFID:SA0615~hypothetical protein, similar to two-component sensor histidin	SA0615	N315	1
TACAAACCATAGCCGGGTACACGGTCTTTGCAGTTGGTTTAAAGTATTTAACTAAACGTAAAAATAAATA	hypothetical protein	MW0215	MW2	0	1
TACAAATAAACTTACGGAAATTGAACAGTCAGATTTACAAATGCATATTGGTGAAATAGAAGATGCGAAT	ORFID:SA1447~hypothetical protein, similar to deoxyribonuclease	SA1447	N315	1
TACAAATCTAAAATACTGTTGAAATATATTTTTAGTGAAGAATCAGAAGTTAAAGATTTAACTGAAGAAA	hypothetical protein	SA0324	N315	0	1
TACAACCATCATAATACTTCTCAAATCTCGTCAAATTAAAGTAAATACAGCACAAATTAACAATTTTAAA	hypothetical protein	SAR1325b	MRSA252	0	1
TACAATTGTAAATGCTGAAAATGCAGCACATGGTAAAGGTTTGACTGAAAAAATATATAAACAATTACTA	conserved hypothetical protein TIGR00282	SA1307	COL	1
TACACCAGCAGGTTATTATTTTGATCAAGATGTGGTTACTAAATCAGGCATATTAAAAGAGGGGCGACTC	o-succinylbenzoic acid synthetase	SA1614	N315	0	1
TACAGCAGCTATTATGTTAACTAATCCAAATACTTTAGGTATTTTCGAAAAAAACATTATGGAAATCCGT	ORFID:SA1365~glycine dehydrogenase (decarboxylating) subunit 2 homolog	SA1365	N315	1
TACATCAACGTTCTTTATTCAATGAAGCACGTATTGCCGTTACTTTAATTCGTGGGAATCATTACTTTAA	ORFID:SA0646~hypothetical protein, similar to deoxyribodipyrimidine photoly	SA0646	N315	1
TACATGCAATTTTTGTCATTTTTACTAAAAAAGCAGATAAAGATGGTTATATTATATTCCCTAAAAATTA	conserved domain protein	SA1047	COL	1
TACATGCAGGATTTTTAGTTCATACACCATATACGATGTTAAAGTTACGTGAGGCTACAAATGAATATAT	conserved hypothetical protein	SA0212	N315	1
TACATGTATTAACTTTTTTAACTAAGCATCATTCAGAAAAATTCAATAGTAGTTCATTAGCTGAATTAAC	putative DNA-binding protein	SAR0601	MRSA252	1
TACATTTAAAATAAGTGATCAGTCATTCTACCAAATTAATTCTGAACAAACAGAGAAATTATATAATAAA	RNA methyltransferase, TrmA family	SA1957	COL	1
TACATTTAAAGATTTAGGTAAACAAGTATTTAATTACTTTTCAACACCTTCATTTGTAACGAATATATAT	heat shock protein, Hsp20 family	SA2385	COL	1
TACATTTATTACTAATCGTATTAAATATTATTATATTGCTTTTTTTCAGTTTACCGTTGTTACTTTCATA	hypothetical protein	SA0889	N315	1
TACATTTTCAACAATGAGAGATTTAACAGCAGGTATCGTTTCTAAATCTTACGCATTAAATTATTTATTA	anaerobic ribonucleoside-triphosphate reductase	SA2410	N315	1
TACCAATACATTAGTTAATGGTTTAATGTATCAAATTAAAAATTTGTCAGGTATTAATGGAGAAATTCGT	ribosomal large subunit pseudouridine synthases, RluD subfamily	SA1209	COL	1
TACCATATTACAAAATAAATAGAAATAATAATTTATTCGTACAAGATTATGGAATTAAGCGTAAAGGTAG	hypothetical protein	SA0611	N315	1
TACCATATTTTATTCAGCAACAATATTGGTTCTTGTTTTATCATGATGAAAACTACTTTGCTGTAAAATA	metallo-beta-lactamase family protein	SA1797	COL	1
TACCATTTTTAATAATTATATTGTTGCATTCTAAATTTAGATTCAATGCTGTAAGTATGATATTAGTAGG	iron compound ABC transporter, permease protein, putative	SA1144	COL	1
TACCCTGAGTTATCTTTTGAAGAATTTCAAACACATGATTATATTGTTAACCAATTAAGCCAGTTATCTT	hypothetical protein, similar to N-acyl-L-amino acid amidohydrolase	MW0504	MW2	1
TACCCTTCTGAATTGTCTGGTGGACAAAGACAACGAACATCTGCTGCAAGAGCGTTTATTACATTACCTT	ABC transporter ATP-binding protein	SA0616	N315	0	1
TACCTATGGCATTACTTAACACTTTTGAAAGGAAAAGCCTATTGTGATATCTATTGCAAACGCATTACAT	hypothetical protein	SAS028	N315	0	1
TACCTTAATTATTGAAAAGGGGAATGTCGTTGAATCAATCTATAATTATCCTACTCACCAAACATTTTTC	ORFID:SA1311~hypothetical protein, similar to thioredoxin reductase homolog	SA1311	N315	1
TACCTTCAACACCGTATGATGCTAAAGGTCTATTATTATCTTCAATTGAATCAAATGATCCTGTTTTATA	2-oxoisovalerate dehydrogenase beta subunit	SAR1594	MRSA252	0	1
TACGAACATATAGATGGTATGATTAAATCTTTAATCGATGATACAAATCCATCATTGATTATTTCATTTT	conserved hypothetical protein	SA0525	N315	1
TACGAGCAAGATTATTTGTCGATCAAATTGTATCTTTTGTGAATAATAGTCCATATGAACATTTAAAATA	azoreductase	SA0607	COL	1
TACGAGTTAGGTAAGTATGTAACTGAGCAAGTATATATTATGATGACAGCTAATGATGATGTAGAGGCGC	hypothetical protein	SAS062	N315	0	1
TACGCAGGTATTGATTTAATTAATAATAAACTTGAAAGACAAGTTCGAAAATATAAAACACGTATTAATC	ribosomal subunit interface protein	SA0815	COL	1
TACGCTCTGCTTTAGATAAAACTAAGATTTCACAAACAACATGGTTATCTTCAACTGGTTTCACTGGTGA	conserved hypothetical protein	SA2128	N315	1
TACGGCATTAACCTTCTTTGTTATGCCTGACAAATATACTGCTTCTACTCAAATACTAGTGAACATGAAA	capsular polysaccharide biosynthesis, capA	SA2457	N315	0	1
TACGTGCGATTTTACGTCGTCAGCCACAAAAAGATATTATCGATGTCAATGGTATTACAATTGATAAGAA	truncated (putative response regulator ArlR	MW1305	MW2	0	1
TACTAATGGTTCACAATTTTTCATTGTTCAAATGAAAGAAGTACCTCAAAATATGTTAAGTCAACTTGCA	ORFID:SA0815~peptidyl-prolyl cis-trans isomerase homologue	SA0815	N315	1
TACTAATTGTCGATCAATTTACAGGACGTACAATGCCAGGCCGTCGTTTCTCAGAAGGTTTACACCAAGC	preprotein translocase subunit	SA0708	N315	1
TACTACAATGGTTACAATAACTATAACAATTACAACAACGGTTATAGCTACAATAACTACAGCCGTTACA	staphyloxanthin biosynthesis protein	SA2291	COL	0	1
TACTAGTTATCTTAATCTTAATGAATGGCGTTGCGATTATTTTACGTAACAAATTTAGTAAAAAATTCTA	phosphate ABC transporter, permease protein	SA1422	COL	1
TACTATGATCATAAAAAAGTGTTAGAAAATATAAACATTAAAATAAATAAAGGTGAATTTTTAGCGATTG	ORFID:SA1385~hypothetical protein, similar to ABC transporter ATP-binding	SA1385	N315	1
TACTATGCAGCAAGATTTTCGTTTCGTACCAATCTCTCAAAATAATAAGATACAAGAAACTGTAAAAATT	hypothetical protein	SAR1491	MRSA252	0	1
TACTGAAAAATTATGAAAATTTAACATATGTAACTAATATTTATGGTAAAAATCTAAAAGATAAAGGCTA	exonuclease	SA1954	COL	1
TACTGAATTTAAAGCAGAAGTATACGTATTATCAAAAGACGAAGGTGGACGTCACACTCCATTCTTCTCA	translational elongation factor TU	SA0506	N315	1
TACTGTCACCAGTACAAATACCGGCAAGCATTATTATTGCATTAATTGGTATACCAGTGTTATTTTACAT	ORFID:SA0567~hypothetical protein, similar to iron(III) ABC transporter	SA0567	N315	1
TACTTATTTAGAAAATGAAGATATTCGTGCTTTAATTCAAAAATTAAAAGATAAACATGTTAATATGATT	DNA ligase, NAD-dependent	SA1965	COL	1
TACTTGTTATCGTTTCAACATTAGGTGGTATTTTCATTTTAGGAGAAAGAAAAGATCGTCGTCAGATGAC	ORFID:SA2053~glucose uptake protein homolog	SA2053	N315	1
TACTTTTAGCACAATATGGAATTGTTACGACAGGAGATAAAGATGTTGAAATTCCTAAGCATTTAATCAT	ORFID:SA0339~hypothetical protein, similar to ABC transporter ATP-binding	SA0339	N315	1
TAGAAAAATTATATGTATTTACAAAAGCAGCGTCATCTTTAACAGGAGATAATGCAACAATTCCAAATCA	ORFID:SA0829~hypothetical protein, similar to 5-oxo-1,2,5-tricarboxilic-3-p	SA0829	N315	1
TAGAAAATGAATTTACGCCAAACTTTAACTTTAATGATTATCACATTATGATTGTACATCCATGGCAATT	hypothetical protein	SA1983	N315	1
TAGAAAATTTAGACATTTGTATTTTTGCAGAAAGTTTAGGAGGTACTGAAACATTAGTGACCTTCCCTTA	ORFID:SA0347~hypothetical protein, similar to cystathionine gamma-synthase	SA0347	N315	1
TAGAAATAATTTCATTGTGTTCGTTTTATCATTTTTTATTAGTATTATATTGTATTCATCGCACGTATTA	conserved hypothetical protein	SA1490	N315	1
TAGAACTCAAATGATTACACTAAATGAACCTTTTAATGTAGACGAATTACTAGAAACAATAAAAGAACAT	hemolysin, putative	SA0762	COL	0	1
TAGAAGAAATAGATTTAATTGGTAGTCATTTAGATAAAGAAATCGAAGATTTAAATCATTCTATTCAGAA	putative transposase	SAR0698	MRSA252	0	1
TAGAAGAAATTGAATTAATAGACCGCTATGCTAATGATACGGTGCAAGTTGTATTACGAGTTAATCCAGG	diaminopimelate decarboxylase	MW1288	MW2	1
TAGAAGATGTTGAAGGGGTTATGGCCATTGACGATATAGCTCAAGTCGAAGGTTTAGACATGATAGTCGA	ORFID:SA0118~hypothetical protein, similar to various aldolase	SA0118	N315	1
TAGAAGCATTACATGAAAATTCTCAAAAAGTTGAAAATAAAAATGAAATAGCGCAAGTAGGTGCGATTTC	GroEL protein	SA1836	N315	1
TAGAAGGAACAGCTACAATTAATGAATTGTTAGAACATGGGAATTTAGGGATTGCAACGTTAACAGGGTC	ORFID:SA2394~hypothetical protein, similar to alpha-acetolactate decarboxyl	SA2394	N315	1
TAGAAGTTATTTAATAGAAGAACTGGATGATTGTCTCACAATACAAAAAAATAATGACACTGCATATTAC	conserved hypothetical protein	SA2403	N315	1
TAGAATAAAAGTTGCAATACTGTTTGGGGGTTGCTCAGAGGAGCATGACGTATCGGTAAAATCTGCAATA	vancomycin/teicoplanin A-type resistance protein VanA	VRA0040	Michigan	0	0
TAGAATATAATTATCGCTACTATTTAACTGAAAATGAATATAAGCAATACCATATTCAATTAAAGGGATT	para-aminobenzoate synthase, component I, putative, authentic frameshift	SA0774	COL	1
TAGAATTAATACATATGTTTGATCATCAACAATTTATAACTTTACTACTATATGCTGTAACAAGTTATGT	crcB protein	SA1832	COL	1
TAGAATTGAAAAAAGCTTGTTACAAGCGCATTTTCGTTCAGTCAACTACTGCCAATATAACTTTGTAGAG	hypothetical protein	MW2385	MW2	0	1
TAGACAATAAAATGAATAATCAAATGAATAGAATTGAGTTATTAAAAGAACGTAAAAAAGAACTATTACA	probable specificity determinant HsdS	MW1750	MW2	0	0
TAGACTGTGACATCATAACTCATTTAAGAACTTCGCTTATTAATTTTCTACCAATACAATCCCTTCTAAG	hypothetical protein	SAS004	N315	0	1
TAGAGATATTAAGCCACAAAATATATTAATTGACAGCAATAAAACGTTGAAAATATTTGATTTTGGAATT	protein kinase. POINT MUTATION	SA1232	COL	1
TAGATAATCCGATAAAGCCATTGCAAAATGATAAAGATAGCATTATCGATTATATTAAAGGAGCTTTATA	threonine synthase	SA1165	N315	1
TAGATATGACAGAGAGCTTTAATGAAACTATGGAAAAGTTTAATACAAGAGATAAAAATCGATTCGAAAG	conserved hypothetical protein	MW1349	MW2	1
TAGATATGATATTTGGTACACATAATATTCATCATTTACCAGAAATTTTAGAAGAAGCATACTTATCTAA	tRNA-i(6)A37 modification enzyme MiaB	SA1312	COL	1
TAGATTGGTTAAAGATAGCTAATGAATATAAAATTCCTACTTATGTATTAGGGGTAGGACTTGGCGGTTT	ORFID:SA1584~lysophospholipase homolog	SA1584	N315	1
TAGATTTATTAATCCCACCATTCTCAAGTCGTAAACAATATGATGACTTATCATTCAACTTTTTATATTA	hypothetical protein	SA1156	COL	0	1
TAGCATGAATATTTTCTTCGTTGAAAATGGAAAAGTAATTACACCAGAGTTGAATGGCAGTATTTTACCT	ORFID:SA0512~branched-chain amino acid aminotroansferase homologue	SA0512	N315	1
TAGCATTAGGTTTTGATGAAGATTTACGAGATTATCATATTGCTGCACAGATTTTAAAATATTTTAACAT	riboflavin biosynthesis protein	SA1587	N315	1
TAGCATTATCTGAATTTGGTGATCAAGTATTCACTTGGCAACAATATGACGAAATTGTTGAAAAAGAAGG	isocitrate dehyrogenase	MW1638	MW2	1
TAGCATTGACATCCATTTTTCCAATGCGACCACTCCTAAAAGAAGCGGATAAAATCTTTTTATTACCATT	hypothetical protein, similar to ABC transporter ecsB	MW1776	MW2	1
TAGCGGTCAGTCTAACTGCACTATTTTCAGGTATGTTTGTCGTTGGAGCAGGTGGTCTAGCAGATAAAAT	ORFID:SA0099~hypothetical protein, similar to transmembrane efflux pump	SA0099	N315	0	1
TAGCTATTAAGAATTTGAAACAATTAGATGAGAACTTTGGGGTTATTGAACAACCAACTTTAAAATTCGA	ORFID:SA1974~hypothetical protein, similar to UDP-N-acetylglucosamine pyrop	SA1974	N315	1
TAGGAATGAAAGGTACTTTCATTAAAGTTAAAAAAGAAAAATTCTTAGATGAATTAGAAAAAAGTAAATA	transcriptional regulator CodY	SA1272	COL	1
TAGGACAATCTGAAGTATTTATTTCAATTAAAAAACAATTACCATACATACCTAAGCAACGTTTATACAC	pyrimidine nucleoside transport protein	SA0479	N315	1
TAGGATCGGGTATTAGCTTGGTTCAAGTTGACTACAAAAGACAGTTAGTGGGCTCTACGATGAGTCAAAT	NADH dehydrogenase subunit 5	SA0411	N315	0	1
TAGGATTTATTCGAAATGGTGGCTTTAATATATATAGTCATCCAGAACGTATCATCGACTCTGAACAATA	protein homolog ORFID:MW2198	MW2198	MW2	1
TAGGGAAAATTATCACACAGATACAACAATACAAAGATATTGATTACCCGATAGCGATTGTCTTTCAAGC	uroporphyrin-III C-methyl transferase	MW2320	MW2	0	0
TAGGTATTCCTGCATTTTTAATGAGTATCTTAATGGGATTCACAGGATTAGTTTTAAATTTATTTTTAGC	conserved hypothetical protein	SA0323	N315	1
TAGGTCATAAATTAGGTGAGTTTGCTCCTACTCGTACATTCAAAGGACACGTTGCAGACGACAAGAAAAC	ribosomal protein S19	SA2235	COL	1
TAGTAATGTTATCTCCATTATTAATCATATTCTTTATAGTGTTGTCTATTTTAGAGGAGCGTAAACGTAC	hypothetical protein	SA2419	N315	1
TAGTAGAAGAAAAAGTTTTTAAAGATCCGATACATCGATATATTCATGTTGAAGATCAATTGATATGGGA	conserved hypothetical protein	SA0560	N315	1
TAGTATCACTAGCAATGACAAATTATTGTTAGTTGGTTCAGGTGCATATCCAATGACGTTAATTCAAGTA	conserved hypothetical protein	SA2257	N315	1
TAGTGAATACATATGTAACTATTCCATCAGTATTGTTAAATATTTTAAATACTATATCAACAATTTGCTT	conserved hypothetical protein	SA0329	N315	1
TAGTGATACTGAAATATTCAAATTGCTCTCTTTATTACAAGACGATATAGATCATATGAAAGTTAGTTAA	conserved hypothetical protein	SA0625	COL	1
TAGTGATATGGTAACTGTAACATCTACTGATGATAAAAACGTAGTAATCATGTCAGAATCAGATTATAAC	addiction module antitoxin, Axe family	SA2405	COL	1
TAGTGATGTTGATATTGATGGTTGTATTGCCCATGTGGATTATTATTTTTTGGAAACACATGGACAGGAC	molybdopterin biosynthesis protein moeB	SA2071	N315	1
TAGTGGTGCTGTAACAGATGCTTATATTCAAGCAATGAAAGATCGTGAGCAAGTTGTATCAACATTTATG	PTS system, mannitol specific IIA component	SA1962	N315	1
TAGTGTAAAAAATGAATTTGAATTGTTATGGCAAAAGAGTACCCCACTGACTGAGCAATGGATTAATTCA	conserved hypothetical protein	SA2277	N315	1
TAGTGTTATTAAAGATTTGAATAAAATAAAGGAAACTGAGAAATATTGGAATGTATTAGATGATTATTAC	ORFID:SA0886~hypothetical protein, similar to lactococcin 972 immunity	SA0886	N315	1
TAGTTGTTTATGTAGCAGGAGGGTGTCTATGGGGTGTTGAAGCATTTTTTGCAACAATACCTGGAATTAT	ORFID:SA2453~hypothetical protein, similar to peptide methionine sulfoxide	SA2453	N315	1
TATAAAAAGATACTAATTCGTTTATTAATTGCTTTTGCAGTACTTTTCTCAGCAGATTTCACTTATCAAT	conserved domain protein	SA2557	COL	0	1
TATAAAACGTTTATTACTACCGCTGATGAAATTATAGAGAAGTATGGTATGAGCCGTCAGCATCATCGTT	ORFID:SA2421~hypothetical protein, similar to transcriptional regulator	SA2421	N315	1
TATAAAAGCTACCTATTAGCAGTACTGTGCTTCACAGTCTTAGCGATTGTGCTTATGCCATTGCTGTACT	putative exported protein	SAR2091	MRSA252	0	1
TATAAATACATACACAAACTTTTTATATTCTAAACAAATCATCAACAATTTGTATCATGAAGCAGTTAAA	membrane protein, putative	SA2354	COL	1
TATAAATATCATGCTAAAAATAAAAAATTAGTATATCTTTCATTAGGTTTAAGCACTGTAGGAACCGTGT	conserved hypothetical protein	SA0508	COL	1
TATAACATTCCAAGTTATTAATAAAAATGTAACAGCCATTACAAGCAATCAAAAATTCAAACTAAAATTA	response regulator-related protein	SA2360	COL	1
TATAACGACACAACTAATCGTAGTTTCGTTGAAATGGAAGCCACGATAGAAGTAGTTACTGATCAAAAAG	ORFID:SA2170~hypothetical protein, similar to general stress protein	SA2170	N315	0	1
TATAAGTATTTTCAGCAGAACAATAAAAAAATGGTGAAGAAGATTAATGAGTTACTTAAAAGTATTGACA	conserved hypothetical protein	SA2195	N315	1
TATAAGTGCAATTTTGATGAAAAATAAATGGCCGTTTTTAATTGCTTTACCATTTATGATTGGTTATGGC	transcriptional regulator, MerR family	SA2517	COL	0	1
TATACAAATGATTTAGGTACTGAAATTGAAGAAATTGAAATTCCTGAAGACCACTTAGATAGAGCTGAAG	translation elongation factor G	SA0593	COL	1
TATACAAGAAAAATATATGATAAATTAGGATATGAAAACACTAAAAATTATGATCAATTAAAAAAAGTAG	endonuclease III, putative	SA0664	COL	1
TATACACATAATACTGTAGATGAACATTTAGATATGGTAATGATTACTCACCATTTAAATGCGGCTATTC	urease, alpha subunit	SA2282	COL	1
TATACACCATTCATTGATTGGCTTGGCTATATATTCTATCCATTTATTTATATTTTCCCAATTGCTGATC	conserved hypothetical protein	SA0308	N315	1
TATACCAATTGGTTATACGTTTAACTTAGACGGATCAGCACTTTATCAATCTATTGCAGCATTATTCGTT	proton/sodium-glutamate symport protein	SA2172	N315	1
TATACTAAAAATATGTCACACTGCAATGTTCACGTTTAAAAGAGTCTCAATCTCTGCAAATAAAATATTC	hypothetical protein	MW2264	MW2	0	1
TATACTATTTTATCAAAAATAATAATGAAACCTACATTATTAAATCAAACTTATATTACTTATACAAAAT	conserved hypothetical protein	SA1524	COL	1
TATACTATTTTTCTTTATTATATTTGTGCATAATTTCGATTTTATGCTTTATATCACTATCTTAATGTTA	cobalt transport family protein	SA1084	COL	1
TATAGAGTTTTTAATGGCTGCAAGAATACTTCAAGGATTAACATATAGTGCATTGATTCAAAGTGTCATG	drug transporter, putative	SA0103	COL	1
TATAGATAAAAATAATGCGTTAAAAGCAATAGTTAATGGTTATAAAACACTACAAGCAGAAGTAGATGAC	peptide chain release factor 2, programmed frameshift	SA0818	COL	0	1
TATAGATGTTAATAAATTGCTTCAAGCTTTTGTCTATTTTAAATCATTTGAGAAGTTACGACATAATAAT	hypothetical protein	SAS017	N315	0	1
TATAGCTATTGTAATGGCATTATTTTTAGTATTAGCTGGTTGCTCTAATTCTAACGATAATAATGAAAGT	probable molybdate-binding protein	SA2074	N315	0	1
TATAGGTAAATCCGTGTTAATCATTAATGGCGCTGGGGGTGTAGGAAGTATTGCCACTCAAATTGCTAAA	putative zinc-binding dehydrogenase	SAR2277	MRSA252	0	1
TATAGTGGCGGTCATGTTGATAACCCTACTTATGAACAGGTATGTACGAATAAAACCGGCCATGTCGAAG	peptide methionine sulfoxide reductase	SA1257	N315	1
TATAGTTATTACTACCACTTTTGTTATCTTTAATATTTTAATCACATATAATAAAGATTTAGATGATTTA	hypothetical protein	SA0865	COL	1
TATATAAAAAAGGGAAATTTTTATCAATTCAAATGTACAATGCTTTAGCATATAATTATTATTATTTAGG	TPR domain protein	SA0828	COL	1
TATATAAAAAAGTAGGCTTTATATCTGATGGACAGATTGAATTATACAAGCACATGTATCATCATTTAAT	acetyltransferase, GNAT family	SA1048	COL	1
TATATAAAGAAGGAATTACTAAACATACAGTTAGATTACTTCATGCAATCGAATTAGAACGTTTAAATTT	ORFID:SA2095~hypothetical protein, similar to D-octopine dehydrogenase	SA2095	N315	1
TATATAGCTGGTTAAATGGGATGTCTACTGAAGATATATTAATTGCTGGTATGGTTAACGCAAAGAAAAC	truncated hypothetical protein	SA0300	N315	1
TATATATTAAGTATTATGGCAGCAATGAAATAGTAGCATTAAAGCTCACAGATGATTTAATTAATAGAAA	ORFID:SA0264~hypothetical protein, similar to penicillin amidase (EC	SA0264	N315	1
TATATATTAGAGCGATAATTCCAGTATTTCCTTTAGCACTCTATATTTTAATTAACATTCAAGCTTATGG	conserved hypothetical protein	SA0824	N315	0	1
TATATCATTAAAGTCAATTGCTGAAGAAAATAATTTGAGTGATTTATATTTAGAACAGCTTGTAGGTCCT	Rrf2 family protein	SA1681	COL	1
TATATCATTTTGAAAAGATATATAAAGCTATCAAACATGTCATTGTTTTTATATTTATGATTTTCATTGC	transglycosylase domain protein	SA1779	COL	1
TATATCGTTTTAAAGCTTAAAAGTAAGCCTAATAAACTACATCAAATGTCTAAAAAATATGTATCTGCCA	conserved hypothetical protein	SA0577	COL	1
TATATGAAGGTATAGATTTGAAAAAACAAGGTACGATTGGTTTAATAACATATATGAGAACCGATTCTAC	DNA topoisomerase I	SA1267	COL	1
TATATGAGACAACAAATTACTAATTTGATTCAAATCATTGATACGATTAAATATAATACCTTAATGACAG	hypothetical protein	MW2235	MW2	1
TATATGGGTCAAGATAATGATATTTTCAAAGATCAATTAGGTCATCTAACTGTTCAGCTAAGAAAGTATC	siderophore biosynthesis protein, IucC family	SA0102	COL	1
TATATTAATGAAATTAAAATTAAAGATGACATACTTTATTGTTATACAGAAGATTCTATTAAAGGATTAT	conserved hypothetical protein	SA1009	COL	1
TATATTAGTTGTTTTCACAGCAATTTCATATATTTTAGGTGTTCAATTTAAAAGAATGTCATTTTTACAA	Na1/H1 antiporter, putative, authentic point mutation	SA1014	COL	1
TATATTATCTGGTTTTGATCCAATAAGAAGAGAAATTGCTAGAACAGCACTTGTTAACTTAGTATCTGAT	HD/HDIG/KH domain protein	SA1305	COL	1
TATATTCACTAAATTATTTAGTGATCTTTTTCGTGTTAGCTGTAATTGTTTCATTACTTACTTTGATCTA	ORFID:SA0965~cytochrome caa3 oxidase (assembly factor) homolog	SA0965	N315	1
TATATTGACTGCGGGGACCCAACACAGAGAATTTCTAAAAGAAATTCTACAGGCAATGCACGTTTATGTT	hypothetical protein	SAS024	N315	0	1
TATATTGATATGGAACATCCTAGAAAATCCAAATGTAATTGTCCTCATGCTGATGGAAGACGAGTGATAT	hypothetical protein	SA1210	N315	1
TATATTGATGAAATAAATATGGCTAAACCTGAAACATTGCCTGTATTAAATGGTGTATTAGATTATCGTC	ORFID:SA1241~hypothetical protein, similar to nitric-oxide reductase	SA1241	N315	1
TATATTGCAGATATTCAGAAAAAACTTCAAGAATATAAAGCAATGGGTAAAATTGATTTTCAATTAACAC	conserved hypothetical protein TIGR00106	SA1603	COL	1
TATATTGGTGATTCAACGTTTGATGTTGAGATGGCACAACGTGCTGGTATGCAATCTGCAGCTGTCACTT	hydrolase, haloacid dehalogenase-like family	SA0619	COL	0	1
TATATTTATCTCGCTACGTTTTTAGAGTATGTCGTACTATACCTCACTTTATTTACGGACATACTAAGAT	hypothetical protein	SA0647	N315	0	1
TATATTTATTAATTCACAAGTTGGTATTTTATTATTTCTTATGAGTTGCCTATTTAATATCATTTTATCA	conserved domain protein	SA2037	COL	1
TATATTTCTGGAAAATATGTATTAGATTTACAAGAAGATGATGTTTATTGGTGTACAGCAGATCCAGGTT	acetyl-CoA synthetase	SA1783	COL	1
TATCAAAACGACTTATATTTACTTAATAACAATTTCCTATTACAAATCAAATTAGATTTAGATTCATTAA	conserved hypothetical protein	SA1923	COL	1
TATCAAAATTCCTACAAGTGAAATTAAAAATATTACACAAGACCAAGATATTCATGCAGTTCCTAAATTA	conserved hypothetical protein	SA2163	COL	1
TATCAAACAAGTACATATTTACAAGATGATATTGGTGATTTACGTCAAGGATATGAATATTCTCGTACTG	trans-sulfuration enzyme family protein	SA0503	COL	1
TATCAACAACAACATCCTGATGATGAAGTGAAACATATTGATTTATTTGAAACTTATATTCCAGTTATTG	NAD(P)H dehydrogenase (quinone), putative	SA0190	COL	1
TATCAAGCCACTTCATTTCAATCGTCATTCACTTTGGAAAATGGACTTTATATTTCATCACTAGTAAAAT	hypothetical protein	SAS086	N315	0	1
TATCAATTGATAGATAAACCTACAGACGTACATACATTTACTCCTAAATACCATAAATTAGCTGAGGCGG	ORFID:SA1856~hypothetical protein, similar to glycoprotein endopeptidase	SA1856	N315	1
TATCACTGGAAGATTTACTTGAAGGTGCAAAAGATACTTTGATTCGACATGATGTTAATGAAGACAATAT	lumazine synthase	SAV1767	Mu50	1
TATCAGCATTGTTATACTTATTGTTAATTATTTTAAACAGCTCAATAAAATAAATACTAGAAAATTTAAA	hypothetical protein	SA1746	N315	1
TATCATCCACCATGATCTATCAAAAGCAAAGCAATACTTTGATCGCATTATTCTATTAAATCAAACATTA	ABC transporter, ATP-binding protein	SA0690	COL	1
TATCATGAGATTGAAATGATAATGACAACAGTTGATTTAAATGATCGTTTAACTTTTCATAAAAGAAAAG	4-diphosphocytidyl-2C-methyl-D-erythritol kinase	SA0538	COL	1
TATCATGATAGTGAAGAAACTGAAGAAGATGTTATTGATGTGAAAGACAAAGATAACGAATCTAAATTAG	cell division protein	MW1068	MW2	1
TATCATTGCTTGAAATTATAAGTAATAAATATAACTTTAATTATCAAATAGAGCACCACGAATTTGGTGG	3-isopropylmalate dehydrogenase	SA2047	COL	1
TATCCAAATAATCGTACTGTTCATTATGGTTATACAGCTGCATTTATACTTGTTATATTACAAGTTATCA	ORFID:SA0964~hypothetical protein, similar to heme synthase	SA0964	N315	1
TATCCAACATGTTCAGAGTACACTAGAGAAGCGATTCAATACCACGGTGCTTTCAAAGGCCTTTATTTAG	conserved hypothetical protein TIGR00278	SA1842	COL	1
TATCCAATTATGATTAATAAGTGGTATATTCCACAGGAAATATCTGAATTAACACTGACACGTATAAGAC	transcriptional regulator, GntR family	SA0120	COL	1
TATCCATGTAGTAAATGGCACTTATTACTTTCACGGTCATATCGTGCCAGGTTGGCAAGGTGTGAAAAAG	conserved hypothetical protein	SA0351	COL	0	1
TATCCATTACATAAAAGTATACATTTGTTATTTTTCTTACCATATAGAAAATCGTTTAAAGTTCATAAGT	conserved hypothetical protein	MW1781	MW2	1
TATCCATTTTCAGATCAGAACGTGGTTTAACTGAGAATATCGTTAGAGAAATTTCTAACATGAAAAATGA	conserved hypothetical protein	SA0778	N315	1
TATCGATGTAGTGTTAGAATGTACTGGTTTCTACACTGATAAAGATAAAGCACAAGCTCATATTGAAGCA	glyceraldehyde-3-phosphate dehydrogenase	SA0727	N315	1
TATCGCAGTAGCACGTGCAGCAGCTGACTTATTAGGTCAACCACTTTACAAATATTTAGGTGGATTTAAT	enolase	SA0842	COL	1
TATCTAGGGGTTATACCATTTTTACAAGATTTAATTACAGATGGCATTATTGCTGGTGTAGGATCAGTAT	ORFID:SA2337~ferrous iron transport protein B homolog	SA2337	N315	1
TATCTATTTACTATTTATCTTAGCGGCACTCCTTATTACATTAACGACGATCCAACATGTAACAGAAGAT	hypothetical protein	SA0268	N315	1
TATCTGTAACCATTTTAAAAGACTTGAATGATAACTTGAGCATTTCTAATGTCATTAATGAAAAGGTGCT	ORFID:SA2358~hypothetical protein, similar to transcriptional regulator (Te	SA2358	N315	1
TATCTTAAGCATAATACTAAAGAACCCAATACCATCAAAACTGTACATTTCACAAGTTTAAAAAGAGGAC	conserved hypothetical protein	SA2487	COL	0	1
TATCTTAATTCTGTTAAGGAAGCACAAGAGGAGTCAAAAAATAAAAGTAATCCCAAAATTGATGTTGATC	hypothetical protein, similar to transporter	MW1823	MW2	0	1
TATGAATTAGTATTTGGTGCAGGGTCAATTGGCATTATGGGTGCCATTCAAGATGGTGTATTAAATCATG	conserved hypothetical protein	SA0635	N315	1
TATGATAAGGACATCAAAAAAGCAATTGACGATGTCAAAGAAACTAAAAAGGATGAATTTGCTAAAATTC	hypothetical protein	SA0269	N315	1
TATGATGGTAAGCATTTTAAATTAAATAAAACAGATAAGACATATATAAAGGAAGAAATTATAAATATTG	conserved hypothetical protein	SA1190	COL	1
TATGATTTTAATGTTTGCGATAGCAGGTTGTGGCAAAGGTAATGAAACAAAAGAAGGTTCAAAAGAAACA	putative lipoprotein	SAR0439	MRSA252	0	1
TATGCCTTACATTGATGCTGAGCGTTTGTATCACTTTGCTATGGAACGTAAATCGTTAGTCACTAACTAG	conserved hypothetical protein	SA2491	COL	1
TATGGATATTTGTATTGAAAATGGTATTATGGGGATTCCAAGTTTTCTAGTATATAAAAATGGTGAACTG	ORFID:SA1565~thioredoxin homolog	SA1565	N315	1
TATGGATTATTGAAAAAAGTAGTACATATTGATGCCATCAGCAGTATTACGATTGAATGTATTGTTACAG	ORFID:SA2487~hypothetical protein, similar to rarD protein	SA2487	N315	1
TATGGTACTAAATATGAAGCACATCAAATTTGGGAATGGGAGAATCATCATCATGAACCTAAATTTAAAG	hypothetical protein	SAS010	N315	1
TATGTAGTGCCTAAAGGAACAATTTTTGCTTCTTCAATCGAAATTTCAAATACTTATAGTTTAGTAGGTT	conserved hypothetical protein	SA0625	N315	1
TATGTATCATTTATTAATCATGATAATTATGATGATGTATTAAATATTGTTGAAGCAACTTTAAATGATG	autoinducer-2 production protein LuxS	SA2126	COL	1
TATGTATTAATTTGGATAATTCAATTCTTTAAAAATAAGAACTACGTAAACACTATTAACAAGCAACTGA	hypothetical protein	MW2285	MW2	0	1
TATGTGCGATAGGTAATGGTTTAGTCGCAACACCTGGACTTACGATTGCAATTTTCAGTATGCCTAATGA	drug transporter, putative	SA0261	COL	0	1
TATGTGTTCAAAGTGTGTACATCGGTGTGACGATTGATGATAAATTGAGCTCAGATGCTCAAAGGAGAAT	hypothetical protein	SA0227	COL	0	1
TATGTTGATTGGATGAATTCAGAATTTGGTCCATCAGGAAAGGAAAACTACTATATGTATAAAAAGTTTG	hypothetical protein	MW0277	MW2	0	1
TATTAAAAAAGAAATTGCTGAAATCTTAAAGAGTGAAGGTTTCATTAAAAATGTTGAATACGTAGAAGAT	ribosomal protein S8	SA2225	COL	1
TATTAAAACAGATTATATACAAAATGATTATCCAACAACGAAACCAATTTTTGCATGTTATACAAAAGAT	ORFID:SA2240~hypothetical protein, similar to para-nitrobenzyl esterase cha	SA2240	N315	1
TATTAAACAACTTCGTACGTCGTGTTTGTGATTGTAAAGGACAATGGACGATGGAAAACTTTATCGAAAT	GMP synthase	SA0376	N315	0	1
TATTAAACAATACGATTTGTATGCTTACTTGTCTGAAGAACAACATAAAACAATATTTTTAACTGATATT	primosomal protein N`	SA1224	COL	1
TATTAAACAATATGGTACAAGGTGTTTCTCAAGGATACGTAAAAGTACTTGAACTTGTTGGTGTAGGTTA	ribosomal protein L6	SA2224	COL	1
TATTAAACGAACGATAATTTTACTTATATTATTCGTTGTCGTATCCCCTATAAACTCACCAAAAACAATT	conserved hypothetical protein	SA0750	N315	1
TATTAAACTTTAAATTAATATTTACCTTACCGTTAACGATTTTAAACCGCCAGTCGTTATTTAAAAATAT	ORFID:SA0220~hypothetical protein, similar to glycerophosphodiester phospho	SA0220	N315	1
TATTAAAGAGAATATTGAAGTAGCAGAAAAATATGGTGCAGTAGATACAGTCATTGAAGCAATTGATACG	hypothetical protein, similar to 4-diphosphocytidyl-2C-methyl-D-erythritol	MW0227	MW2	1
TATTAAAGATATGAAAAAATCACAAAAATACGAAGAAAAAGCAGGCTTAACACCTAATAAATTAGATGAG	conserved hypothetical protein	SA0742	COL	1
[truncated: 532 more rows]
