# Supplementary material for: Potential Associations between Severity of Infection and the Presence of Virulence-Associated Genes in Clinical Strains of Staphylococcus aureus
Source: PLoS One. 2011 Apr 26;6(4):e18673. doi: 10.1371/journal.pone.0018673 (PMC3082525; doi:10.1371/journal.pone.0018673)
Supplement: Table S2 — Overall association of S. aureus genes with clinical outcome. (XLS) [file pone.0018673.s003.xls]

## Sheet: Supplemental_Table_1
Table S2. Overall association of S. aureus genes with clinical outcome.
sequence	common_name	locus	strain	pi	vf	sp	mec_ indicator	percent_ ambiguous	p_ association	fdr_ association	p_mrsa_vs_mssa	prop_pres_sick	prop_pres_notsick	prop_pres_MRSA	prop_pres_MSSA	prop_pres_CC30	prop_pres_CC5	prop_pres_other	prop_pres_CC1	prop_pres_CC8	prop_pres_CC15	prop_pres_CC45	significan_ association	selected_ for_ verification
AAAAAACTTAGAGAGGTTTATCCAATCACAACAAAAAAATCTCCAGTATTAAAATTACATATAGATGGTG	hypothetical protein	MW0397	MW2	1	0	0	0	0.33	0.0496	0_tan	0	0.14	0.28	0.07	0.48	0.1	0	0.54	1	0	0	0.27	0	0
AAAAAAGATGATTTTGTTGCCTATGCATCACCTGAAAATAACTTTCAATTTGTAGGTGATTTAATTAAAA	hypothetical protein	MW2401	MW2	0	0	0	0	0.12	0.0667	0_tan	0.4797	0.99	0.94	0.97	0.95	1	0.98	0.96	1	0.83	0.5	1	0	0
AAAAAATTGAATTTACTTTTTTAGAGAATAAAAATGAAAATATTTACTTTACTGATAGTCTACATCTTAA	hypothetical protein	MW0072	MW2	0	0	0	0	0.3	0.0047	2_orange	0	0.21	0.43	0.16	0.63	0	0.02	0.63	1	0.94	1	0	1	0
AAAAAGACTTTCATGGTACATAAGCATCTTAATTTTAATAGTTGTTATAGCTGGTTGTGGCAAAGGTAAT	hypothetical protein	SA0396	N315	1	0	0	0	0.26	1	0_tan	0.003	0.9	0.91	0.85	0.99	0.75	1	1	1	0.63	1	1	0	0
AAAAAGATAATGTACCGTCAGATGATTTTAATACTACTGTTAGTGGTGAAGATAGTTGGAAAACACTTAC	probable beta-lactamase	SA1633	N315	1	0	0	0	0.35	0.7439	0_tan	0.7401	0.61	0.58	0.58	0.61	0.21	1	0.64	0.29	0.27	0.13	0.4	0	0
AAAAAGATTGAGGTTGGAAATACTTAATCCAACGAAGGAACAAGATTCCAATATTGTATATGGACCATTA	hypothetical protein	MW1404	MW2	1	0	0	0	0.35	0.0122	1_yellow	0	0.14	0.31	0.09	0.5	0.2	0.02	0.38	0.71	0.31	0.38	0.5	1	0
AAAAAGCAAACATACAAACCTCATGTTAAACAATCAAAAGAAAAAACGCCTAAATGGCTCACAGACGGCA	hypothetical protein	MW1920	MW2	1	0	0	0	0.54	0.3953	0_tan	0.1372	0.9	0.84	0.91	0.8	0.95	0.86	0.88	1	0.57	0	1	0	0
AAAAAGGCATGGATGCAGAAAAAGTGGCTAACATGCCGATACACTTCTTTTTAGACATTGTCGAATCGAA	hypothetical phage protein	SAS1879	MSSA476	0	0	0	0	0.27	0.0003	3_red	0	0.48	0.76	0.23	1	0.45	0.3	0.97	0.94	0.86	0.86	0.93	1	0
AAAAAGGTCAAATTAGCCATAGACGAAATGCAATTAATTTATTAGAAGCTTATCTTGCGGGTGATCAAAA	conserved hypothetical protein	SAR1124	MRSA252	0	0	0	0	0.19	0.5835	0_tan	0.0261	0.8	0.83	0.76	0.89	1	0.57	0.86	0.7	0.57	0.67	1	0	0
AAAAAGGTGATCAGACGATTTTCCTGTCCAAAACAGAAATGATTATATTAGAAATTCTTATTACCAAAAA	DNA-binding response regulator	SA0716	COL	0	0	0	0	0.3	0.7046	0_tan	0.0065	0.97	0.96	0.92	1	0.96	0.88	1	0.93	1	1	1	0	0
AAAAAGTCTATCAACAAGTACATCAGAATCGTCTAGTACATCAGCATCATTAAGTGACAGCACATCGAAT	putative cell wall-anchored protein	SAS2540	MSSA476	0	0	1	0	0.09	0.1616	0_tan	0.0195	0.92	0.96	0.9	0.98	0.81	0.98	1	1	0.95	1	1	0	0
AAAAAGTTATTTTAGAGGGAAATTATAGAGAGAGTAACAGGGCACCTTCCATAGTTGATTTTCTTTATGA	putative DNA-binding protein	SAR0704	MRSA252	0	0	0	0	0.23	0.3212	0_tan	0.0234	0.88	0.93	0.85	0.96	1	0.69	0.96	0.94	0.73	1	0.89	0	0
AAAAATAAATATGGAGTGGAAAGATACTCGGTCGGTGGTATCACAAAGAGTAATAGTAAAAAAGTTGATC	exotoxin 9	SA0385	N315	1	1	0	0	0.11	0.6759	0_tan	0.0609	0.97	0.98	0.95	1	0.94	0.97	1	1	1	1	1	0	0
AAAAATCAAGAAATTGTAAGTGATTTAGAAAAAGGTTTGTATCGAAAACGTATGTTAAGTTATGGTGGAT	hypothetical protein	SAP002	N315	0	0	0	0	0.06	1	0_tan	1	0.99	0.99	0.99	0.99	1	0.98	0.97	1	1	1	1	0	0
AAAAATGAAATTGTATAGTTGCTTTTGTAAAATTTATAATCCTTCTATGAAAGATAGAGAGATTTTAAAA	hypothetical protein	MW1396	MW2	1	0	0	0	0.28	0.1036	0_tan	0.4672	0.83	0.71	0.74	0.8	1	0.55	0.8	0.7	0.64	0.64	0.69	0	0
AAAAATTCAGGCATTTTCAAACAGTGACATTTGAAGATTTGTCGAAATTGGAAAAAAGTAGTACACCATC	arginase family protein	SAR2420	MRSA252	0	0	0	0	0.24	0.6696	0_tan	0.0613	0.97	0.98	0.95	1	1	0.9	1	0.93	1	1	1	0	0
AAAAATTCGAGGTTATACCAGAAATGGAATATAAAATGGAAGAAATTAAAGAAATCGAACAATATATTAA	conserved hypothetical protein	SAS0273	MSSA476	0	0	0	0	0.11	0.587	0_tan	0.1018	0.98	0.99	0.97	1	0.96	1	1	1	0.94	1	1	0	0
AAAAATTGACAAAGGCAAAAATGATGAATTCAACACAATGTCTTCTAACTTAGATAAAGAAATTAGCAGA	ORFID:SA0272~hypothetical protein, similar to transmembrane protein Tmp7	SA0272	N315	0	0	0	0	0.22	1	0_tan	0.3126	0.85	0.84	0.82	0.88	0.71	1	0.92	0.55	0.5	0.75	1	0	0
AAAACAAAACATAATAGACGAGATTAAACGCCTTGCACTCAAGAATAAAAGAAATAGTATTGCTACGATT	transposase	SAR1827	MRSA252	0	0	0	0	0.34	0.1083	0_tan	0.1898	0.65	0.52	0.63	0.52	1	0.08	0.35	0	0.73	0.14	0.38	0	0
AAAACCCATTAACGCCCAAAGAACAAATTGTATTAAGGGAAATTGGCAATGGTTTAAGTAGTAAAGAAAT	DNA-binding response regulator, LuxR family	SA1355	COL	0	0	0	0	0.04	0.1797	0_tan	0	0.91	0.96	0.87	1	0.77	1	0.97	1	1	1	1	0	0
AAAACTGCATTTGATACAGTTGCAAAATATGACCAAGTAAGACAACCGAATGTAGTTGCAAAACTATATA	putative membrane protein	SAR2275	MRSA252	0	0	0	0	0.21	0.3556	0_tan	0.1241	0.97	0.99	0.96	1	1	0.91	1	1	1	1	1	0	0
AAAACTTAAAAGAGAAAATAGCAATTATAGACCCAGCAGACCATCATTACTATCAACCATTATGGACGTT	ORFID:SA0084~hypothetical protein, similar to homo sapiens CGI-44	SA0084	N315	0	0	0	0	0.18	0.4276	0_tan	0.0289	0.96	0.98	0.94	1	0.89	1	1	1	0.95	1	1	0	0
AAAAGAAAACTCAAGCGATTGGACAATTAAAAGTAACTAAACCAGATATCGATAATTTGATGAAGACAGT	hypothetical protein	SAV1980	Mu50	1	0	0	0	0.31	0.0399	0_tan	0	0.7	0.84	0.6	0.95	0.72	0.55	0.91	1	0.86	0.8	1	0	0
AAAAGAAGGTGGAAAAATATTTGGATCAGGAAGTAGAGCACCGATAGCTATATCTATTTTAGTTAAAGAT	conserved hypothetical protein, degenerate	SA2205	COL	0	0	0	0	0.33	0.1563	0_tan	0	0.22	0.32	0.13	0.53	0.15	0.06	0.57	0.2	1	0	0.3	0	0
AAAAGAATTGACTGAGAATTTTAAAATAACTGATTCATCAAAGAAAAAAGCTTTAAATTGGTGGGATTAT	hyaluronate lyase precursor	SA2003	N315	0	1	0	0	0.19	0.2643	0_tan	0.053	0.76	0.67	0.77	0.64	0.57	1	0.67	0.29	0.33	1	0.5	0	0
AAAAGATATGTACCTGAAATATATTGATATTTTTAAAGAGGCTTCCATTCAATATTTAAAAGAGAAATAA	ORFID:SA1814~hypothetical protein, similar to succinyl-diaminopimelate desu	SA1814	N315	0	0	0	0	0.19	1	0_tan	1	1	0.99	0.99	1	1	1	1	0.89	1	1	1	0	0
AAAAGATTTTTTAAAATATCGATTTAATTTAACATTTCTTGATTTATCTATCTTATATGTAATATCATCT	staphylococcal accessory regulator U	SA2507	COL	0	0	0	0	0.23	1	0_tan	0.7547	0.66	0.66	0.67	0.64	0	0.98	0.48	0.86	1	1	0.2	0	0
AAAAGCAAGAATTGTAACAATAAACGATAAACCTTATAGGTTCAGTAAATTTGAAATGGAATTAATAGAA	hypothetical phage protein	SAR2077	MRSA252	1	0	0	0	0.1	1	0_tan	1	0.99	0.99	0.99	0.99	0.97	1	1	1	1	1	1	0	0
AAAAGGTAATAGTTACGCTTGCATAAATTCTTTCCAGCCGATTAGTAAGTTTCGCATAAGAAAAGTTTTA	hypothetical protein	SA0319	COL	1	0	0	0	0.4	0.2068	0_tan	0.1156	0.25	0.35	0.26	0.4	0.17	0.5	0.25	0.14	0.17	0.17	0.2	0	0
AAAAGGTTTTGTTATAGATTTTGAAAATCCGTTAGAAAGTGATTCTGGTAACTATTGCATGGATTTAGAA	hypothetical protein	SAR1313	MRSA252	0	0	0	0	0.36	1	0_tan	0.0035	0.63	0.62	0.53	0.77	1	0.08	0.67	0.78	0.22	0.33	0.5	0	0
AAAATAAATGGCCGTTTCTAATTGCGTTGCCGTTTATGATTGGATACGGCATTGGTGTTACTTTTTATTA	hypothetical protein, similar to transcriptional regulator, MerR family	MW2426	MW2	0	0	0	0	0.46	0.0346	0_tan	0	0.62	0.79	0.54	0.92	0.33	0.77	0.77	1	0.75	1	1	0	0
AAAATACCAATCTATCAAGCGTTGAAGTACAACAAAAGTCATTTTTATTTAACGAACATTATGGATTCCT	hypothetical protein	SAR0426	MRSA252	1	0	0	0	0.3	0.3652	0_tan	0.0004	0.73	0.8	0.66	0.89	1	0.27	0.9	0.57	0.42	0.5	1	0	0
AAAATAGTTTTATGTATTAGTTTTCTATTTTTAACAATTTTTATTGGGGGTTGTGGCATGGGTAAAGAAG	putative lipoprotein	SAS0074	MSSA476	0	0	0	0	0.22	1	0_tan	0.4731	1	0.99	1	0.99	1	0.98	1	1	1	1	1	0	0
AAAATATAACACACTATCACTTTGACAATGTAGATTTATTAATAACGACCCATGATATTCCTAAACAAAC	transcriptional antiterminator, BglG family	SA2662	COL	0	0	0	0	0.08	0.3078	0_tan	0.0013	0.94	0.97	0.92	1	0.84	1	1	1	0.95	1	1	0	0
AAAATATAATCATCAAAAGTATTGCAGCATTGACGATTTTAACATCAGTGACTGGCGTCGGCACAACAAT	serine protease SplF	SA1627	N315	1	1	0	0	0.06	1	0_tan	0.4688	1	0.99	1	0.99	1	1	1	1	1	1	0.92	0	0
AAAATATTATGAGCATTCAATCGAAAAGATAGTTTTTGCTGATGATAACGGTAAAATTATTGCAATGAAT	sensory box histidine kinase, putative	SA2390	COL	0	0	0	0	0.16	0.3338	0_tan	0.0296	0.88	0.93	0.86	0.95	0.63	0.98	0.97	1	1	1	0.75	0	0
AAAATATTGGACTAGAAGAATTTGGTTCGGATATTTTAACGGAGTTGGGAAAGCGACCTATGACCCGAAA	hypothetical protein	SAV0899	Mu50	1	0	0	0	0.28	0.5747	0_tan	0.2466	0.78	0.81	0.77	0.84	0.72	0.89	0.85	0.73	0.73	0.5	0.93	0	0
AAAATCATACGGCTAATCCTGAACAGGCGGCAAAGTCTAACACAGAAAATGTATCAACATCGCTTTCAAC	exotoxin	SAR0424	MRSA252	1	1	0	0	0.2	0.1231	0_tan	0.0008	0.91	0.97	0.89	1	1	0.81	1	1	0.82	1	1	0	0
AAAATCCAAAAAGTAAAAACTACCTAGAGGTACTTATGGCTAAGAATAGGGACATTAATTTTGGTACTGT	hypothetical protein	SA0141	N315	0	0	0	0	0.26	1	0_tan	0.2424	0.93	0.92	0.9	0.96	0.96	1	0.92	0.73	0.29	1	0.86	0	0
AAAATCGGTTATATTCGTGTCAGTTCGACTAACCAGAATCCTTCAAGACAATTTCAGCAGTTGAACGAGA	Tn1546, resolvase	VRA0036	Michigan	0	0	0	0	0.46	1	0_tan	0.298	0.01	0.02	0.01	0.05	0.04	0	0	0	0	0	0	0	0
AAAATGAAAGTTATAAATGAATATAATTACTTTGACTACCATAAGAAAAGGTGGGGGCTCTTTGGGTATT	hypothetical protein	SAV0804	Mu50	1	0	0	0	0.56	0.419	0_tan	1	0.98	1	0.98	1	0.97	1	1	1	1	1	1	0	0
AAAATGCATATGAAATAGAGTTGAAACGTATTGAAAGGGAGATACAAAATCTTAGTGATTTAAAATATCA	hypothetical protein	MW0075	MW2	0	0	0	0	0.25	0.0016	3_red	0	0.39	0.63	0.12	0.94	0.35	0.22	0.93	1	0.46	0.63	0.92	1	0
AAAATGGATTAATAGAAAATTTGAAAATTATGCACGTAGACACGGCTTTATCTCAGCTGTTCCATTACGC	hypothetical protein	SAV0850	Mu50	1	0	0	0	0.29	1	0_tan	0.2236	0.82	0.81	0.78	0.87	0.97	0.57	0.79	0.92	0.87	0.88	0.75	0	0
AAAATTAGACACACTAGAAGAAGTAAAAAAGGGCTATTTTCCAATCAAACGTGCGATTGACTTGGTATTA	putative sugar transferase	SAR0131	MRSA252	0	0	0	0	0.24	0.4332	0_tan	0	0.9	0.93	0.84	1	1	0.71	1	0.91	0.78	1	1	0	0
AAAATTAGAGTATAACTATAATGTTTTAAGACAGTTTGGGTTACAAAATAACGGGCAACCAGTCATCAAA	hypothetical protein	SAR0379	MRSA252	0	0	0	0	0.36	1	0_tan	0.0836	0.67	0.68	0.61	0.75	1	0.15	0.75	0.29	0.64	0.44	0.44	0	0
AAAATTGAGAATATTACGGATTCAACTCAAACTAAAATGGATGCTTATAAAGAAGTTAGACAAGCAGCTA	FmtB protein	SA1964	N315	0	0	0	0	0.27	0.8614	0_tan	0.3717	0.76	0.74	0.78	0.71	0.61	1	0.63	0.3	0.31	0.25	1	0	0
AAACAGGATTCCAAATAGGCGTAATGGAAGCTAGGTTGAAGAAGATGAGAAAACAACGTGATGAGTACAA	hypothetical protein	SAV1977	Mu50	1	0	0	0	0.2	0.1349	0_tan	0.2068	0.88	0.95	0.89	0.94	0.89	0.89	0.92	0.92	1	1	0.88	0	0
AAACATACACACACAAAGATACTCTTACTGTGACATATGCAGGCGAGATTGAGCACACTTACGAAGTCGA	hypothetical protein	SA0326	COL	0	0	0	0	0.34	0.3163	0_tan	0	0.61	0.7	0.52	0.88	0.47	0.8	0.75	0.56	0.55	0.33	0.93	0	0
AAACATATAAATAAAAAAGCGACAAAACTACTTGAAGATTATAAAAAGGTTCAACAAAGAAAATCGGAAG	hypothetical protein	SAS035	N315	0	0	0	0	0.03	0.4655	0_tan	0.4957	0.99	1	0.99	1	0.98	1	1	1	1	1	1	0	0
AAACCTATTATCATAATGGAAGTGCTATAATTGAAAATAAAGAGAGTAATGATCAATTTTTAAAGAACAC	enterotoxin P	SA1761	N315	1	1	0	0	0.31	1	0_tan	0	0.37	0.37	0.24	0.6	0.25	0.45	0.63	0.22	0.33	0.29	0.4	0	0
AAACCTTTTAGTATTAGTTCTATCACATATATATTAGCTAACCCATTCTATATCGGCAAAATTCAATTTG	cassette chromosome recombinase B	SA0057	N315	0	0	0	1	0.18	0.0004	3_red	0	0.72	0.47	0.98	0.03	0.74	0.83	0.05	0.43	0.69	0	0.08	1	0
AAACGAAAGAGAAAATCAAAGTGACAACTTTAGATGAATTGACACCCTTAATTGGTAAAAAGGTTATTGT	assimilatory nitrite reductase small subunit	SAR2488	MRSA252	0	0	0	0	0.25	0.2352	0_tan	0.0006	0.86	0.92	0.82	0.98	1	0.68	1	1	0.67	0.71	1	0	0
AAACGAAATATACCTTAGATTACGATAATGTATCAAATGAATTTCTAGTAGAAGATTCACATGATAATTA	truncated hypothetical protein	SAVP019	Mu50	0	0	0	0	0.34	0.2139	0_tan	0.0077	0.33	0.23	0.35	0.13	0.58	0.14	0.08	0.17	0.21	0	0	0	0
AAACGATCCAGAGTATTTAAGATTTTATAAATCGAAAACGTGGCAAAACATGCGTCGAATTGTATTGTTA	hypothetical protein	MW1910	MW2	1	0	0	0	0.25	0.0111	1_yellow	0	0.43	0.62	0.22	0.94	0.31	0.23	0.96	0.88	0.8	0.67	0.85	1	0
AAACGCCAAAGAATATGTAGTACGAGCTAAATTGAAAGCTAGAGAAGTAATGAATAAGGGTTATTGGACT	hypothetical protein	SAV0896	Mu50	1	0	0	0	0.26	0.3334	0_tan	0.1158	0.79	0.85	0.78	0.88	0.77	0.9	0.93	0.88	0.64	0.25	0.93	0	0
AAACGGTTTAAAAATCAAGATGTATTAAAGCATATTAATATCACTTTAGAAAATAACGAAGTTTATGGAT	hypothetical protein, similar to EpiF [Genomic island nu Sa beta2]	MW1760	MW2	1	0	0	0	0.34	0.0543	0_tan	0.006	0.11	0.23	0.11	0.29	0.02	0	0.38	0.78	1	0	0	0	0
AAACGTAATAAATATGGTACTTACTACATGGAAGAAAGTGCTAGATTCACAAACGGTAATCAACCAATCA	amidase	SAV0913	Mu50	1	0	0	0	0.3	0.1882	0_tan	0.0294	0.73	0.63	0.74	0.58	0.92	0.53	0.43	0.33	0.64	0.2	0.85	0	0
AAACGTGTTGATACTATTTTTGTAGTAGATAGTAATAACCATTTACTAGGTTTCTTAGACATTGAAGATA	amino acid ABC transporter, ATP-binding protein	SA2453	COL	0	0	0	0	0.19	1	0_tan	0.4957	0.95	0.96	0.96	0.94	0.93	1	0.96	0.67	1	0.33	1	0	0
AAACTAAATTAAGGAATGATTTATATAGTATTACTGCAAGCATTGATTTGGGTCAAAAATTGCATGTTGT	ATP-binding protein, putative	VRA0052	Michigan	0	0	0	0	0.37	0.0725	0_tan	0	0.38	0.53	0.26	0.75	0.33	0.15	0.69	0.94	0.45	0.8	0.77	0	0
AAACTATATACATCTTATGGCACTTATGGATTTTTACATCAAATAAAAATCAATAACCCGACCCATCAAC	signal transduction protein TRAP	SA1653	N315	0	0	0	0	0.16	0.5444	0_tan	0.7633	0.96	0.93	0.95	0.94	0.87	0.98	1	1	1	1	0.67	0	0
AAACTATTCGCCTGAGAATGCAATGAAGTCAGCAATGTTACAACTGCAAGAATTAAAAGGATCTAAAAAA	hypothetical protein	SA1794	N315	1	0	0	0	0.39	0.5071	0_tan	0.1748	0.54	0.48	0.55	0.41	0.37	0.8	0.2	0.25	0.25	0	0.5	0	0
AAACTTAGAGGACGAAGACTTAATTCCAGAAGAACAAATAGTAATTACACTAAGCCATAATAACTACATT	DNA gyrase, A subunit	SA0006	COL	0	0	0	0	0.07	0.473	0_tan	0.4865	0.99	1	1	0.99	1	1	1	1	1	0.86	1	0	0
AAAGAAAAAGAAGCCAAGAAGTTACTTGATGACATGAAAACTGATACGAATAGAACATATTTGTGGTCAG	hyaluronate lyase precursor 1	SAR1892	MRSA252	1	1	0	0	0.33	0.8689	0_tan	0.4016	0.65	0.67	0.63	0.7	1	0.26	0.64	0.27	0.5	0.57	0.38	0	0
AAAGAAAGTGTACTCAAGAAGATTTAGCAAACCTCTTGAATATATCAACTGAAGGTTATCGTTTAAAAGA	prophage L54a, Cro-related protein	SA0322	COL	1	0	0	0	0.26	0.1584	0_tan	0	0.59	0.7	0.4	0.92	0.58	0.58	0.92	0.69	0.33	0.71	0.87	0	0
AAAGAAGTAGGTGCAGGTGTTTCTGTGCATGTTAAAAGATACTACATTTATAAGGAAGAGATTTCGCTGA	exotoxin 3	SAR0427	MRSA252	1	1	0	0	0.25	0.5254	0_tan	0.0047	0.84	0.88	0.79	0.94	1	0.61	0.94	0.89	0.67	0.63	1	0	0
AAAGAAGTTTATTATTTTTAACTGTTTTATTGTTATTATTCTCATTTTCTTCAATTACTAATGAGGTAAG	STAPHYLOKINASE PRECURSOR	SA1758	N315	1	1	0	0	0.08	1	0_tan	0.6777	0.98	0.97	0.98	0.97	0.97	0.98	1	1	1	0.67	1	0	0
AAAGACTTTAGTTTTCAATATCATAGTCAAGCAACACCTACATTACAGAAAATAAATGTTGATATTTATC	hypothetical protein, similar to cation ABC transporter (ATP-binding protei	MW2603	MW2	0	0	0	0	0.06	1	0_tan	0.1044	0.99	0.98	1	0.97	1	1	0.96	1	1	1	0.8	0	0
AAAGATAAATATTTTAAATAATCATATATATTCCGAATATTTTTTTAGAGACCTGTTAAATATTGTATAT	hypothetical protein	SA1860	COL	1	0	0	0	0.3	0.0678	0_tan	0	0.25	0.39	0.16	0.57	0.12	0.04	0.5	0.93	1	0.33	0.29	0	0
AAAGATGGTACAGTGTGGACAAGTTTATATAAAAAGAATGAGACAACAGATAAATATGTAAAAGTTGAAG	conserved hypothetical protein	SA1574	COL	0	0	0	0	0.25	0.0027	2_orange	0	0.34	0.57	0.09	0.94	0.29	0.22	0.84	0.67	0.5	0.83	0.85	1	0
AAAGCATATGCTTTGATGAGTATACCACGACATAATTTACCAGAAAGTGAGAAGGCTATTTATGACAAAG	putative exported protein	SAR2149	MRSA252	0	0	0	0	0.21	0.4959	0_tan	0	0.87	0.9	0.78	0.99	1	0.57	1	0.83	0.83	0.89	1	0	0
AAAGCGATCAAAATACTTGGGGAACGGGCAGGGGCTCGACTTCGCGATAATTTTAAAAATCCATGTATAA	hypothetical phage protein	SAR2065a	MRSA252	1	0	0	0	0.08	0.4932	0_tan	1	0.99	1	0.99	1	0.99	1	1	1	1	1	1	0	0
AAAGCGCTTAGATGACAATCCGGGTGAATTACTAAAGTATGACAGTATAACAATAAGACATGCATATATA	conserved hypothetical protein	SA0348	COL	1	0	0	0	0.32	0.5549	0_tan	0	0.78	0.83	0.68	0.97	0.9	0.58	1	0.58	0.56	1	1	0	0
AAAGCGTATTTAGTTGAACTTATCCGTTGGCTTTTCACTTTTGGCATTTTATTCCAATTGCCAATATTAT	conserved hypothetical protein	SA0334	N315	0	0	0	0	0.22	1	0_tan	0.2284	0.85	0.84	0.82	0.88	0.72	1	1	0.57	0.45	1	0.54	0	0
AAAGCTGTAAATGTTGAAGGTTCTACAAAAATCGGAGCAAAACAAATGTATCAGTCCATACAATTTGCTG	conserved hypothetical protein	SA0043	N315	0	0	0	1	0.41	0.0028	2_orange	0	0.92	0.72	0.97	0.39	0.94	0.94	0.63	0.57	0.44	0	0.57	1	0
AAAGCTGTGAAAGATAATAAAGTATATGATGTTGATCGAAATAAGTGGTTGCAATCAAGAGGTATTATGG	transport system extracellular binding lipoprotein	SAR1011	MRSA252	0	0	0	0	0.18	1	0_tan	0.5004	0.99	0.99	0.98	1	1	0.98	1	0.92	1	1	1	0	0
AAAGGAACCAATATTTTAACTGGAATAATTTCGTGTCCCCAATGTTCTGCACCTATGGCTGCGAGTAACA	cassette chromosome recombinase B, authentic frameshift	SA0041	COL	0	0	0	1	0.49	1	0_tan	0.5713	0.03	0.03	0.02	0.06	0.02	0.05	0.11	0	0	0	0	0	0
AAAGTACAATGAACAAGGTTATATTATGCTATCCGAAAACTTGCCGTACAACGAAGAAATGTTAGCAAAT	conserved hypothetical protein	SA0341	COL	1	0	0	0	0.34	0.4567	0_tan	0	0.21	0.27	0.1	0.6	0.21	0.2	0.44	0.46	0.08	0.2	0.38	0	0
AAAGTACTTTTTAGGTGGGCTTTTATCAAGCGTATTATTACTGATATTTGGCGTATTTAATCCAATTAAT	ORFID:SA2210~hypothetical protein, similar to BioX protein	SA2210	N315	0	0	0	0	0.12	0.3942	0_tan	0.0002	0.92	0.95	0.88	1	0.79	1	1	1	0.91	1	1	0	0
AAAGTTGGATGAAACACAACGCAAATATTATATAAATATGCTAAAAGATTACTATTCTCAAGAAAGCTAT	exotoxin 5	SAR0429	MRSA252	1	1	0	0	0.26	1	0_tan	0.0004	0.7	0.71	0.6	0.84	1	0.18	0.82	0.5	0.38	0.43	1	0	0
AAATAAAAAAGTGATTGAAAATTATATTCGTAATCAATTACAAGAGGATATCGTTGCAGATGAAATCTCA	truncated hypothetical protein, similar to transposase	MW0122	MW2	0	0	0	0	0.19	0.0129	1_yellow	0	0.6	0.77	0.36	0.98	0.47	0.31	0.97	1	1	1	0.88	1	0
AAATAAGATACACTCGAGATCTTTTCAACAAACATCTAAGCATGAATAACGAAGACGCATTTGCTGGTTT	hypothetical protein	SA0323	COL	1	0	0	0	0.36	0.4949	0_tan	0	0.31	0.37	0.17	0.66	0.26	0.33	0.6	0.44	0	0.5	0.58	0	0
AAATAAGCAAAGAAAATCTAAATTACGATAAAGAGTTTGATCTAAATCAAGGTGCCAAACCTAGTGGAAT	hypothetical protein	SA2204	COL	0	0	0	0	0.37	1	0_tan	0	0.17	0.17	0.08	0.4	0.02	0	0.5	0	1	0	0.11	0	0
AAATAAGGGACAAGCACACCTATCCGATTATCATGCTGACCGGGAAAGATACAGAGGTAGATAAAATTAC	vancomycin response regulator VanR	VRA0037	Michigan	0	0	0	0	0.44	0.1195	0_tan	0.0036	0	0.06	0	0.12	0.02	0	0	0	0	0.14	0.2	0	0
AAATACTTGAGGGTTTACCTAATGCTATGCAAGATGCACTCAAAGGAGATATTTATCTTGATGAAGCAGT	hypothetical phage protein	SAR1532	MRSA252	1	0	0	0	0.15	0.2641	0_tan	0.7104	0.98	0.95	0.97	0.96	0.99	0.93	0.95	1	1	0.89	1	0	0
AAATAGGGACATTATCAGGTTATATAGCTGCGTCAATTATGATTGCCTTACTCACTTTCTTCTTAACTGA	putative proline/betaine transporter	SAR0577	MRSA252	0	0	0	0	0.19	0.4976	0_tan	0.5064	0.98	1	0.98	1	1	0.96	1	1	1	1	1	0	0
AAATATATCACACATTTTTACCTGCATTCACTTTAGGTTTATTATCTACTGCTGGTTATATTCAATATTT	oligopeptide ABC transporter, permease protein	SA0999	COL	0	0	0	0	0.08	1	0_tan	0.2289	0.99	0.99	1	0.98	1	1	1	1	1	0.33	1	0	0
AAATATTAATAAAAATTGAATATAATCATGAAAACAATATGCAAAAGTTAATCATGACTAAAATCCCTTT	hypothetical protein	SA0601	COL	0	0	0	0	0.36	0.1796	0_tan	0	0.85	0.92	0.69	1	0.69	0.89	1	0.93	1	1	1	0	0
AAATATTGATACAAAATGAAGATACACCTAATTTTAATTTTGTAAAAGATTTTGATAGTTTTAAAGTCTA	conserved hypothetical protein	SA1335	N315	0	0	0	0	0.11	0.4836	0_tan	1	0.99	1	0.99	1	0.98	1	1	1	1	1	1	0	0
AAATATTTCTTGGCAAATTAATGAAGGTGATAAATGGATTCTATATGGTTTAAATGGTGCTGGCAAGACA	ABC transporter ATP-binding protein	SAR2241	MRSA252	0	0	0	0	0.15	0.5527	0_tan	0.0022	0.93	0.95	0.89	0.99	1	0.74	1	1	1	1	0.93	0	0
AAATCAAAAGTCAGTAAATAAACATGACAAGGAGGCACTATACCGATACTACACTGGAAAGACTATGGAA	exotoxin 14	SA0390	N315	1	1	0	0	0.06	0.4622	0_tan	0.4933	0.99	1	0.99	1	0.98	1	1	1	1	1	1	0	0
AAATCCACCAATTATTCGGAGTATGTAGAAGTACCGTATACAACTGGTTGAAATATTACCGTGAAGATAA	conserved hypothetical protein	SA0333	COL	1	0	0	0	0.46	1	0_tan	0	0.66	0.65	0.5	0.87	0.71	0.54	0.75	0.67	0.7	0.63	0.75	0	0
AAATCTATGATGGCAGGTTTCTTATTGTCCATTGTTACTGTTTTTATGTTTGGTATTAAAACACAATTCG	putative nitrite transporter	SAR2493	MRSA252	0	0	0	0	0.21	0.7246	0_tan	0.0013	0.77	0.8	0.69	0.89	1	0.43	0.96	0.5	0.47	0.64	1	0	0
AAATCTGAATTTACAGGAGGACCGATTAAACGCATATGGTTGTGAAAAGATATTTAGCGACCATATTAGT	resolvase	SAR1828	MRSA252	0	0	0	0	0.41	0.5718	0_tan	0.004	0.71	0.75	0.65	0.89	1	0.33	0.63	0.6	0.44	0.5	0.83	0	0
AAATGAAAAGAGTTTATTTGTCATTGACGAATTTTACGATGTTGCAATCGCAATCTATTATTTAGATGGA	hypothetical protein	MW1043	MW2	1	0	0	0	0.22	0.6107	0_tan	0.0002	0.89	0.92	0.83	0.98	0.53	0.98	1	1	1	1	0.82	0	0
AAATGAGGACTTCGGTACGATGGATGATTTTGAAAGGTTAATTAATGTTGCGCATGAAAAAGGTATTAAA	putative glycosyl hydrolase	SAR0474	MRSA252	0	0	0	0	0.32	1	0_tan	0.7176	0.74	0.73	0.73	0.75	1	0.5	0.57	0.4	0.7	0.5	0.71	0	0
AAATGATGTGTGGATTGGTGCAAATGTAATTATTATGGATGGATTAACAATAAATACTGGTGCAGTCATA	capsular polysaccharide synthesis enzyme O-acetyl transferase Cap5H	SA0151	N315	0	0	0	0	0.18	0.8054	0_tan	0.214	0.9	0.92	0.88	0.94	0.82	0.98	0.96	0.77	0.95	0.8	0.88	0	0
AAATTAAAAATACTATTTATAATCATTTACATTTAAAGCATATATTTGAATCGATGCCTTATCTCTATGG	conserved hypothetical protein, authentic point mutation	SA2387	COL	0	0	0	0	0.05	0.4983	0_tan	0.217	1	0.98	1	0.98	1	1	0.9	1	1	1	1	0	0
AAATTAACCCACCTGCTCAAAAAGCAGTCGGTAAATCTGCAAGTAAAATAACAGTTGGAAGTAAAGCACC	lytic enzyme	SA1759	N315	1	0	0	0	0.09	1	0_tan	1	0.98	0.99	0.98	0.99	0.99	0.98	1	1	1	0.5	1	0	0
AAATTAAGTGAAATGTACAATGAAATTGCGAATAAAATTAGTAGCATGATACCAGTAGAATGGGAAAAGG	conserved hypothetical protein	SAR0294	MRSA252	0	0	0	0	0.15	1	0_tan	0.2391	0.99	0.99	0.98	1	0.99	0.98	1	1	1	1	1	0	0
AAATTCATATTCGGACATAGATAAAATGAAGTCTTTAATGACAGATAACAGTATTTCTAAAAACGGATTA	hyaluronate lyase	SA2194	COL	0	1	0	0	0.21	0.1898	0_tan	0	0.22	0.3	0.14	0.43	0.11	0.04	0.27	0	1	1	0.21	0	0
AAATTCGGCGCCAACAAGTAAACAGGCACAGGCAGCAATAACCCCATATTATACTTATAATGGTTATATT	immunodominant antigen B	SA2660	COL	0	0	0	0	0.05	0.7103	0_tan	0.0142	0.96	0.97	0.94	1	0.9	1	1	1	0.95	1	1	0	0
AAATTGATACAGGTAGAATTACATATGATATATCAGAAAATAAAATTAAAGACATACAAATAATTACAAA	hypothetical protein	SAR1325	MRSA252	0	0	0	0	0.53	0.4761	0_tan	0.2547	0.83	0.76	0.74	0.83	0.98	0.82	0.82	0.17	0.7	0.25	0.57	0	0
AAATTGCATGATGTACCAGCTAAAGAAAATACAATTACAGAACCAAAGCAAGTTGTAGTGAATCCTTTGT	pathogenicity island protein, authentic frameshift	SA0892	COL	1	0	0	0	0.37	0.0211	1_yellow	0	0.41	0.61	0.13	0.97	0.3	0.15	0.92	0.64	0.87	0.71	1	1	0
AAATTGTTTTTAATGAAGATTATGATGAAGATGGCGTTTACGAAGAGAAACAAGGTAAACAAAACAATTA	hypothetical protein	SA1768	N315	1	0	0	0	0.21	0.745	0_tan	0.001	0.71	0.74	0.63	0.85	0.57	0.83	0.75	0.58	0.55	0.6	1	0	0
AAATTTCATATTAGTCATAAATTCAGCACTATTTATTTGGATAAACTCAGCATTTTACTTATTCATAGGA	hypothetical protein, similar to macrolide-efflux determinant	MW0062	MW2	0	0	0	0	0.21	0.0116	1_yellow	0	0.31	0.49	0.21	0.67	0.13	0.07	0.64	0.93	0.95	0	1	1	0
AACAAAACAATAGTTCAAGACGTCTTAACTAGACATCAACAAGGGCAAACAGATTTTGAAACATTTTGTG	hypothetical protein	SA0419	COL	0	0	0	0	0.36	1	0_tan	0.0049	0.95	0.97	0.91	1	0.91	0.91	1	1	1	1	1	0	0
AACAAATTTTAGAAGGTGTTCTATCAGAAAGTACCACATACGGTGATGCAAGAAATAAATTAGAAACATT	hypothetical protein	SAV1996	Mu50	1	0	0	0	0.26	0.0008	3_red	0	0.37	0.63	0.18	0.96	0.32	0.17	0.91	0.93	0.87	0.71	0.85	1	0
AACAACTGAAGATCAAACGGGTGATACATTGGAAATGAAGGGTGTACATTCAGCTAATTTCAACAATGAC	putative tRNA pseudouridine synthase B	SAR1247	MRSA252	0	0	0	0	0.29	1	0_tan	0.2779	0.98	0.99	0.97	1	1	0.95	1	1	0.9	1	1	0	0
AACAAGAACGTCCAGAGAGTATACCAGCATTAACTAGTGAAAAAAATCATAATCAGACTATGGCATTAAA	ORFID:SA0743~hypothetical protein, similar to staphylocoagulase precursor	SA0743	N315	0	1	0	0	0.28	0.217	0_tan	0	0.63	0.53	0.71	0.39	0.38	0.98	0.35	0.25	0.22	0.17	0.3	0	0
AACAATTACATCAACAAATTGAATTAGTTAAACGCTTAGTCCCTTATGTACCGAAAGTAGAACTTCATAT	putative glycosyl transferase	SAR0569	MRSA252	0	0	0	0	0.24	1	0_tan	0.4974	0.99	0.99	0.98	1	1	0.97	1	0.89	1	1	1	0	0
AACACATCAATCTATGATGCTTGATATGTATATCATATATAAAACAATTAAAAATATCGTTACTTCAGAA	capsular polysaccharide biosynthesis galactosyltransferase Cap5M	SA0148	COL	0	0	1	0	0	0.477	0_tan	1	0.99	1	0.99	1	0.99	1	1	1	1	1	1	0	0
AACACTTAGTATATTGTTTTAAATTAGATAATGATGAATTTAATTTGAAAAATAAGTATAAAAAATACAA	hypothetical protein	SA2292	N315	0	0	0	0	0.62	0.11	0_tan	0	0.59	0.76	0.33	1	0.53	0.7	1	0.83	0.33	1	1	0	0
AACAGGATTGTATTGTGAATTAGTGGAAAAAACGTTGAAAGATTCTTATGTAGAGTATGTCCTACTTTAT	hypothetical protein	SAV0409	Mu50	0	0	0	0	0.41	0.3701	0_tan	0.5245	0.11	0.06	0.1	0.06	0.04	0.04	0	0	0.54	0	0.17	0	0
AACAGTGCGAAAGTTCAACTAGATAAAGAGATTAAAAAGAATAAAGGTAAACATAAGTTAGCTATTGCTT	hypothetical protein, similar to outer membrane protein precursor	MW0284	MW2	0	0	0	0	0.2	0.6537	0_tan	0.0281	0.96	0.98	0.95	1	0.91	1	0.97	1	1	1	1	0	0
AACAGTTTGAATCTACAGGAACTATAAAAAGAATCAAAGACAATATTTTAAATTTTGATGCATACATTGA	serine protease SplC	SA1867	COL	1	1	0	0	0.12	0.2498	0_tan	0.1063	1	0.97	1	0.97	1	1	1	1	1	1	0.67	0	0
AACAGTTTTAGTGTGAACTTACCATGGACAACACCAGGTCCACTCGGCATCATCATGGGTACTGGATTTG	PTS system, lactose-specific IIBC component	SAR2281	MRSA252	0	0	0	0	0.17	1	0_tan	0.4993	0.99	0.99	0.98	1	1	0.98	1	0.94	1	1	1	0	0
AACATAAACATACAACAGATCGCAAAGGACACGTGATTGGAATGTTAGAGTGGGCATTAGATTACATTGT	hypothetical protein	SAR0372	MRSA252	0	0	0	0	0.18	0.4855	0_tan	0	0.88	0.91	0.81	0.99	1	0.73	1	0.85	0.88	0.86	0.93	0	0
AACATAGTGAAATTGGATTCCCAATTTCTACAGACAATGCAAGTTGGCGGGGCCCCAACATAGAAGCTGG	hypothetical protein	SA1177	COL	1	0	0	0	0.06	1	0_tan	1	0.99	0.98	0.99	0.98	0.99	0.98	0.97	1	1	1	1	0	0
AACATATATGAAATGTTAATGCTTGCTACTATCTTTATGATATCTACAATTGCTTATAAACATCAAAAGA	hypothetical protein	SA1783	N315	1	0	0	0	0.28	0.2333	0_tan	0.0091	0.78	0.86	0.74	0.9	0.71	0.91	0.89	0.82	0.46	0.63	1	0	0
AACCGGGTGGTGGCACAACGGACTACGCAGTTGAAATTTACTTCAAGGCTGTAAGAGAAGGACATTATAC	conserved hypothetical protein	SAR0558	MRSA252	0	0	0	0	0.31	1	0_tan	0.2501	0.99	0.98	0.97	1	1	0.91	1	1	1	1	1	0	0
AACCTGACAAAGGAAAGTTATTATCCCAATATTGACCGAACTGAGATGATTTCAAAAGGATACGTGGCTT	vancomycin B-type resistance protein VanX	VRA0041	Michigan	0	0	0	0	0.36	0.0452	0_tan	0	0.04	0.13	0.01	0.27	0.04	0.02	0.18	0.1	0	0.22	0.42	0	0
AACCTGATGAAAAAATTTCAGATACAGAACGAAAATTGAATAGTAAAGAATTTTATAATATTAAACGTAA	conserved hypothetical protein	SA1582	COL	0	0	0	0	0.33	0.0649	0_tan	0	0.09	0.19	0.04	0.38	0.04	0.04	0.53	0.43	0.2	0	0.22	0	0
AACGACAGAGCAAAGTGAATGGAAACCGGTAATCCACGACACAATCAGTGACAGTTTAGTGGTACCTAAT	nitrate reductase alpha chain	SAR2486	MRSA252	0	0	0	0	0.15	0.8733	0_tan	0.7479	0.74	0.75	0.73	0.76	1	0.49	0.7	0.58	0.44	0.5	1	0	0
AACGACCACTCAAGAACTCAAACAATATATAACTCGTCTATTCCAACTATCTAACAATGAAACATGGGAA	hypothetical protein	SA0056	N315	0	0	0	1	0.41	0.0023	2_orange	0	0.93	0.73	0.99	0.38	0.94	0.92	0.78	0.83	0.67	0	0.38	1	0
AACGATCTTGAACAGTATATGGAGATTTTATCAGTTGAGGGAAGTTCAGGTAATTTCAAGTTTTATAATA	hypothetical protein	SAR1895	MRSA252	1	0	0	0	0.28	0.7606	0_tan	0.2769	0.58	0.55	0.53	0.62	1	0.05	0.43	0	0.18	1	0.33	0	0
AACGCATCATGGAATACGATTAGTCGATCATCACCTGTCATGCACCATGTCTTTTTGATTTCCTTTGTGG	putative membrane protein	SAR2543	MRSA252	0	0	0	0	0.15	1	0_tan	0.2293	0.99	0.99	0.98	1	1	0.96	1	1	1	1	1	0	0
AACGTTAGAGAGTGAGGATATGAGTAACTTTGGTCGGAGTCCTGCTGGGATAGATGGAAAGTATGCCCGA	dUTP pyrophosphatase	SAV1974	Mu50	1	0	0	0	0.28	1	0_tan	0.0115	0.92	0.92	0.87	0.98	0.91	0.89	0.96	1	0.92	0.88	0.92	0	0
AACGTTGCTATTGATATTCGAAGTGGAGAAATTCATTTGGTATTAGATGATGATAGCCTTGATATATTAA	SAP domain protein	SA2142	COL	0	0	0	0	0.37	0.056	0_tan	0	0.25	0.41	0.15	0.69	0.19	0.09	0.71	0.1	1	0	0.5	0	0
AACTAATACTAAATTAAAGCAAACAGAAAAAGAATTTAATGATTTAAACAATACTATTAAGAATCATAGC	phage tail tape meausure protein, TP901 family	SA0379	COL	1	0	0	0	0.31	0.1208	0_tan	0.0012	0.85	0.75	0.88	0.66	0.98	0.74	0.42	0.56	0.77	0.83	0.5	0	0
AACTACAATCAATTGATGCTTCTAAAGTAATTTTGACGACTGTATCTAAAATTAATAAAGAAGAACTTAA	hypothetical protein	SA1370	N315	0	0	0	0	0.08	0.4615	0_tan	0.4751	0.99	1	0.99	1	0.98	1	1	1	1	1	1	0	0
AACTACACAATCAGACTGGCGAACGGTTCCTAATTGCTTAGCATCTCAAAATTATATATCTATCGTAAAA	hypothetical protein	SAS0028	MSSA476	0	0	0	0	0.38	0.1004	0_tan	0	0.14	0.26	0.01	0.6	0.17	0.04	0.64	0.22	0.27	0	0.46	0	0
AACTACATCAAATAATGCGAAACCTGTTACAAAGTCAACAAACACAACAGCACCTAAAACGAACAATAAT	bifunctional autolysin precursor	SAR1026	MRSA252	0	0	0	0	0.24	0.7666	0_tan	0.3509	0.93	0.95	0.92	0.96	1	0.82	0.95	0.91	0.89	1	1	0	0
AACTAGAAGATGCTAGATTTAGAACGATTATTAAACTTTATAGTTACTATGTCTCATTAAAAGAACATTA	hypothetical protein	SA1008	N315	1	0	0	0	0.28	0.5256	0_tan	0	0.82	0.86	0.7	0.96	0.34	0.98	0.97	1	1	1	0.78	0	0
AACTAGCGCCTAACTTAAAAACTAGAGATTTAGTGTTATTAAGATATATGTATTCATATAAAGAAATTAA	hypothetical protein	SA0849	COL	0	0	0	0	0.33	0.7241	0_tan	0.2118	0.72	0.74	0.68	0.78	0.28	0.98	0.75	0.8	1	0.29	0.33	0	0
AACTATAGTATATGAAGTTTTAACTAGTGGTAATCAACCATTCACTTATGAGTTACCTAAAGATTTATCG	hypothetical protein	SA0320	COL	1	0	0	0	0.1	1	0_tan	0.4977	0.99	0.99	0.98	1	0.99	1	1	0.92	1	1	1	0	0
AACTATAGTATCTATAGTTTTAATCATAGTCGGCGTAGTTTCGTTAAACATTTTCGGAACATCGCATTAA	quaternary ammonium compound-resistance protein QacC	VRA0026	Michigan	0	0	0	0	0.31	0.7481	0_tan	0.0015	0.62	0.65	0.54	0.79	0.8	0.52	0.8	0.44	0.36	0.5	0.62	0	0
AACTCATTACGAGTATTTGGTTCATTTGGCAACATAGTATTTGGTATGACAGTGATACTTGCATGTTTAA	ORFID:SA0294~hypothetical protein, similar to branched-chain amino acid	SA0294	N315	0	0	0	0	0.08	0.6059	0_tan	0.1196	0.8	0.83	0.77	0.86	0.61	0.98	0.87	0.67	0.5	1	1	0	0
AACTCTTCCTGAGCCAGAACGCAGCAAAGAACACATAACATCAAATGGTGAAACTAAAATTCCATACTAA	hypothetical protein	SAV0802	Mu50	1	0	0	0	0.45	0.3331	0_tan	0	0.65	0.74	0.29	0.98	0.79	0.33	0.96	0.79	0.67	0.83	0.91	0	0
AACTGATTTTTATAAGAATAAAGTATCGAACCATAGTAGATACACAAATAATACAAATGAAACAATTTAA	hypothetical protein	SA2420	COL	0	0	0	0	0.4	0.281	0_tan	0	0.85	0.92	0.7	1	0.71	0.81	1	1	1	1	0.94	0	0
AACTGTAATGTATGCATTATTAAAACTGGAAGAAGCAAAGTATGTTAGTGTTAAATTCGGTTGGGAAGAT	hypothetical protein	SA1800	N315	1	0	0	0	0.17	0.0704	0_tan	0	0.75	0.86	0.66	0.96	0.58	0.88	1	0.8	0.92	0.86	1	0	0
AACTGTAGGGGTTAGCAATGGAGATACTACATCATCGTCACATTGTGCGCTTGGGGATATTGTAGGTCTT	hypothetical phage protein	SAR2089	MRSA252	1	0	0	0	0.28	0.3614	0_tan	0.0157	0.86	0.9	0.83	0.96	0.98	0.67	0.95	1	0.83	0.6	1	0	0
AACTGTCGTACTCGAACCACAAGAAAAAGCAGTGATCAAAACAGATGTAGCTGTGAGTATACCAGAGGGC	prophage L54a, deoxyuridine 5-triphosphate nucleotidohydrolase	SA0357	COL	1	0	0	0	0.21	0.0812	0_tan	0.7728	0.97	0.9	0.94	0.93	0.99	0.92	0.96	0.85	0.93	0.75	0.92	0	0
AACTTTCTATATTTCCAAATATGAATTTACGAATGTGGGAAAATCCAGTTACTCAAAATAATATTCGATT	epidermin biosynthesis protein EpiD	SA1875	COL	1	0	0	0	0.23	0.0045	2_orange	0	0.32	0.54	0.18	0.79	0.27	0.12	0.84	0.93	1	0.43	0.5	1	0
AAGAAAAAATCAATGATGTAGCTATCAAACATGGTTGGTTTGTTGAAGATAAATTTGTCAAAAATGAATT	hypothetical protein	SAV0789	Mu50	1	0	0	0	0.31	1	0_tan	0.0003	0.74	0.75	0.63	0.89	1	0.26	0.84	0.63	0.92	0.4	0.8	0	0
AAGAAAACAAGTCTTTAAAGTCTAAAATAAGCGATTTAAAGCGTGATGTGAGTTTAATCTATGAAAGCAC	plasmid recombination enzyme	SA0029	N315	0	0	0	1	0.34	0.0006	3_red	0	0.77	0.5	0.91	0.06	0.79	0.88	0.23	0.3	0.4	0	0	1	0
AAGAAAATCAAAAAGTAAAGGTGAAATATTCATTTATGGTGATATTGTAAGTGATAAATGGTTTGAAAGT	protease	MW1399	MW2	1	1	0	0	0.31	0.7876	0_tan	0.1729	0.92	0.9	0.88	0.95	1	0.79	0.93	0.86	0.82	1	0.86	0	0
AAGAACAAGAAGGCGCCAAATTATTAGCAGATAAAGGCTATTTAGATGATGTTGATGGTCTAATGATTGC	putative peptidase	SAR2109	MRSA252	0	0	0	0	0.15	1	0_tan	0.2438	0.99	0.99	0.98	1	1	0.96	1	1	1	1	1	0	0
AAGAAGAGGTTAAGTTATTCTCTAAACAAGACTATAAAAATAAAAAAGGTGATAACGTTGACCCTAAACG	PTS system, arbutin-like IIBC component	SAR2408	MRSA252	0	0	0	0	0.26	0.8734	0_tan	0.7461	0.66	0.67	0.65	0.68	1	0.39	0.83	0.11	0.27	0.5	0.4	0	0
AAGAATATGCAATACATGATTTTGAGCTTCCTTTTGATGTGGACGAATACACGCCGATTAGTGAAATCAA	hypothetical protein	SAV0405	Mu50	0	0	0	0	0.43	0.8199	0_tan	0.0181	0.18	0.16	0.12	0.31	0.11	0.09	0.38	0.25	0.54	0	0.22	0	0
AAGAATCAAACAAAATCTATTCCAAAAACGGTTAGCGTCAAAGATTATGATGGTAAATATATTGGTGAAC	hypothetical protein	MW2577	MW2	0	0	0	0	0.36	0.2507	0_tan	0.0038	0.53	0.63	0.49	0.74	0.96	0	0.69	0.86	0	0	1	0	0
AAGACAAGGTATCAAAGTATCAATACAGCAAAGAATACTTTAAAAGGTATTGAGTGTATTTACGCTCTAT	IS431mec, transposase	VRA0002	Michigan	0	0	0	0	0.37	0.0008	3_red	0	0.93	0.72	1	0.29	0.92	0.96	0.33	0.75	0.91	0.14	0.44	1	1
AAGACCGCAGGTTCAAAAAGAAAAATCGCCATCAATTCAAGGATAGCAAATGTATTGAAAAAAATAATGT	prophage L54a, integrase	SA0318	COL	0	0	0	0	0.43	0.5314	0_tan	0.0008	0.23	0.18	0.13	0.41	0.19	0.21	0.09	0.13	0.17	0.5	0.38	0	0
AAGACGTATATCAAACATTTTTTGTTGTTTAACGGATTGATGGGCGGATTGTCCTTTGTATTATTGCTTA	ORFID:SA0068~potassium-transporting ATPase A chain homologue	SA0068	N315	0	0	0	1	0.44	0.0863	0_tan	0	0.94	0.84	0.97	0.39	0.92	0.95	0.6	0.8	0.83	0.25	1	0	0
AAGACTGCGACTCAAAACACACCATCATCAAGTACTGATTCACAAGAGTCAAACACGAATGCATATAAAA	FtsK/SpoIIIE family protein	SAR1819	MRSA252	0	0	0	0	0.33	0.6207	0_tan	0.3096	0.99	0.96	0.99	0.96	1	1	0.95	1	0.89	1	0.67	0	0
AAGAGAAATAGCACTAGATAGGGATAACAACCTATGCCAAATGTGCTTGCGTGAAGGGAAAATTACAGAT	hypothetical phage protein	SAS0930	MSSA476	1	0	0	0	0.33	0.0026	2_orange	0	0.35	0.6	0.02	0.96	0.37	0.18	0.92	0.67	0.5	0.71	0.85	1	0
AAGAGATACTTCAATCAAGTCCTTTTGTTTGGTTTAAAGATGCCTTAGATGGCTATGACTACCTTGTTGA	putative carboxylesterase	SAR0835	MRSA252	0	0	0	0	0.22	0.2181	0_tan	0.0001	0.81	0.89	0.76	0.96	1	0.57	1	0.73	0.64	0.86	1	0	0
AAGAGTATATCGGCGACTTTATTAAGCCTATCAAACCATTACTATATAAGGTACAAACATACTTAAATCA	fmhA protein	MW2333	MW2	0	0	0	0	0.09	0.1845	0_tan	0	0.91	0.96	0.86	1	0.75	0.98	0.97	1	1	1	1	0	0
AAGATAATAGTGGGAATGCAGTAACAAATACAGTCACAGGATTGCCGTCTGGATTAACATTCGATAGCAC	putative serine rich repeat containing protein	SAR2734	MRSA252	0	0	0	0	0.14	0.4593	0_tan	0.0157	0.81	0.85	0.77	0.9	1	0.58	0.97	0.75	0.47	0.88	1	0	0
AAGATAGAATTCAAGGATTTGAAACGATAGCTTCTCAAAATAAAATTAATTATCAAATTATTGAGACTAG	maltose operon repressor	SA1552	COL	0	0	0	0	0.37	0.0216	1_yellow	0	0.41	0.61	0.19	0.95	0.15	0.14	0.92	0.33	1	0.67	1	1	0
AAGATGGTACTAAAGATAGAGTTACACAAATGTGTTTTAGCATGTTGATCGATACACTGAAAGATATATA	hypothetical protein	SAR1897	MRSA252	1	0	0	0	0.31	0.4376	0_tan	0.875	0.53	0.46	0.5	0.48	1	0.07	0.31	0	0.11	0.29	0	0	0
AAGATTTAAAAGAGATACCAGTCCTAATATAAAACCTCGTCAATTTATTGTTATTAGTAGCGATAATGGA	hypothetical protein	SAV0917	Mu50	1	0	0	0	0.29	0.0283	0_tan	0	0.15	0.3	0.02	0.6	0.15	0.06	0.59	0.31	0.23	0.5	0.5	0	0
AAGCACTTTATCTCAATATATTAACGACGTACAATCACCCGACCAAGATAGAATTTACCTACTTTCTAAA	phage repressor	MW1936	MW2	1	0	0	0	0.51	0.4683	0_tan	0.0056	0.45	0.52	0.4	0.68	0.31	0.43	0.89	0.78	0.57	0.5	0.5	0	0
AAGCAGAAATAGAATTAACAGCAGTAAAAACGAAAAAGAAAATTGTTACCATTCAAGAATTAGATGTTCA	enterotoxin homolog	MW1552	MW2	0	1	0	0	0.56	0.0566	0_tan	0	0.55	0.74	0.38	0.96	0.14	0.6	0.83	1	0.2	1	1	0	0
AAGCAGGACATGGCAGAATGCTACAAGTTAATTTGGAAGATTGTATATATATTGGCGATATTGATGTTTA	hypothetical protein	SA1584	COL	0	0	0	0	0.3	0.8454	0_tan	0.0003	0.8	0.82	0.7	0.93	1	0.38	0.9	0.88	0.94	0.57	0.8	0	0
AAGCCATTAGTCAAATGACACCAGCTTTTTGGGTTTACTTTGAATTTGATTTACAAAAAGAGGAAATAAT	hypothetical protein	MW0744	MW2	1	0	0	0	0.3	0.0012	3_red	0	0.23	0.48	0.05	0.87	0.18	0.14	0.81	0.8	0.63	0.43	0.71	1	0
AAGCGCGTATTTAAAGGTGCTGAATATCAATTAAGCGAGATTAGTTCAGATTCTGTAAAATATGAACAAA	yycI protein	SA0022	COL	0	0	0	0	0.41	0.1277	0_tan	0	0.13	0.24	0.03	0.56	0.13	0.06	0.78	0.13	0.38	0	0.5	0	0
AAGCGGACATATGAAAAGTGAAAAAATTCCATCTGTCGGGTTTATTACAGAACCAATATGCTTTATCTAA	hypothetical protein	SAR1832	MRSA252	0	0	0	0	0.35	0.2333	0_tan	0.001	0.75	0.84	0.7	0.92	1	0.5	0.9	0.86	0.7	0.57	0.64	0	0
AAGCTAATAATAGCGCCAGTAATGAGAACAAAATACATGCTTTAACAAATGAGCTACACGTTGAAAATGG	hypothetical protein	SA1795	N315	1	0	0	0	0.21	0.5819	0_tan	0.0847	0.94	0.91	0.96	0.88	0.97	0.97	0.78	0.9	0.94	0.2	1	0	0
AAGCTATGGTCAGTTTTTCTTTAGTTCTTATACAGTTGCCACTGAATTTGGCTTTTTATTATTTTCATTT	conserved hypothetical protein	SA2315	N315	0	0	0	0	0.41	0.8465	0_tan	0.4242	0.76	0.74	0.78	0.71	0.61	1	0.71	0.69	0.22	0.25	0.44	0	0
AAGCTGAATACAAGAAGAAATTAGAAGAGACGAAAAAAGCTTTAGATGAACAAGTGAAATCCGCGATAAC	iron-regulated heme-iron binding protein	SAR1102	MRSA252	0	0	0	0	0.22	0.7367	0_tan	0.1751	0.73	0.76	0.7	0.8	1	0.38	0.87	0.5	0.36	0.5	1	0	0
AAGCTTAAGAATGAAATTATACGAAAGTATGATTTAAAACCCTCAATTATCTCAAATTCGATAAAACAAC	transposase, IS3 family	SA0464	COL	1	0	0	0	0.08	0.3157	0_tan	0.0013	0.94	0.97	0.92	1	0.89	1	1	0.81	1	1	1	0	0
AAGGAAAGTATACAATATTTAATTCAGTTGTGTGGAAAGAGTAATATTCCAATAGGTATAATCCCAGCAT	PfkB family carbohydrate kinase	SAR1587	MRSA252	0	0	0	0	0.27	0.4864	0_tan	0	0.73	0.78	0.62	0.93	1	0.34	1	0.57	0.64	0.57	0.88	0	0
AAGGAAAGTTGCATCCTTTACAAAAATATGTGCATAGACAATTTGAAAATAGAGATCATAAAGTATATGT	hypothetical protein	MW1406	MW2	1	0	0	0	0.51	0.5522	0_tan	0.0011	0.73	0.67	0.57	0.86	0.86	0.53	0.71	1	0.5	0.57	0.7	0	0
AAGGAAGTTGATTTCCGAATCCGCCAAACACTAATTAAAAACAAAAAATTATATAATGGTGATTATAATA	exotoxin	SAR1140	MRSA252	0	1	0	0	0.33	0.7112	0_tan	0	0.75	0.78	0.64	0.93	1	0.23	0.93	0.4	0.5	0.57	1	0	0
AAGGAATTGTGCATTACCCTGATGAGAATTTTAATCGCTGGAGATTTAACGCAAGAAAGATGAATAAATT	hypothetical protein	SAV1991	Mu50	1	0	0	0	0.2	0.5196	0_tan	0.3317	0.93	0.96	0.93	0.97	0.99	0.86	1	1	1	0.71	0.93	0	0
AAGGCATTGAGTCGAATGAGGCAATTTTAAAACGAGCGATAAATGAAGTTAAGTCAAAACAAACGCAATT	respiratory nitrate reductase alpha chain	SA2185	N315	0	0	0	0	0.08	0.8269	0_tan	0.6643	0.89	0.9	0.88	0.91	0.75	0.98	1	1	0.69	1	0.82	0	0
AAGGCGTTAATAGCTGGTGCTAAGGTAATTGTTGAAGAAGTAAAAAAACAACTAAAGCCCTCAAAAGATA	hypothetical protein	SA1770	N315	1	0	0	0	0.08	1	0_tan	0.3705	0.98	0.97	0.96	0.99	0.99	1	1	0.86	0.93	0.89	1	0	0
AAGGCTGTCTATTAGAGGACAAAGATGGAGATTTCTTTTTAAAGTATTATCAATGGAAAATGAAAAAGGA	transposase B for Tn554	SA1483	N315	0	0	0	0	0.25	0.0004	3_red	0	0.84	0.6	0.92	0.36	0.89	0.92	0.35	0.27	0.22	0.29	0.42	1	1
AAGGGCAAATTAGTCATAGACGAAATGCGATTAATTTACTTCAAGCTTTTCTTGAAGGTGAAAAAAATGT	conserved hypothetical protein	SA0998	N315	0	0	0	0	0.06	0.106	0_tan	0.1121	0.97	1	0.97	1	0.95	1	1	1	1	1	1	0	0
AAGGTCAAGTTTCACAAGCATTGATGGGAACTGGTATTAAAGATTCTACTGCAAGAAGCATAGGGTTTTG	hypothetical protein	SA0850	COL	0	0	0	0	0.24	1	0_tan	0.1622	0.88	0.88	0.85	0.93	0.75	1	0.89	0.79	1	0.67	0.77	0	0
AAGGTTATCTATCATGCATCACCTAGAAATTATGAATAGATACTTGGAGTCTCAAAATGAAAATATGTGA	hypothetical protein	SA0182	COL	0	0	0	0	0.25	0.0109	1_yellow	0	0.35	0.54	0.16	0.81	0.22	0.11	0.77	0.5	0.95	1	0.54	1	0
AAGTAGATAATGTTGAAGTTAGCGATGCACATTATACCATTGTAAAAGACGAAAAAGTAGCTATTACGAC	putative molybdenum cofactor biosynthesis protein B	SAR2359	MRSA252	0	0	0	0	0.24	0.8539	0_tan	0.0418	0.78	0.81	0.74	0.87	1	0.57	0.75	0.63	0.47	0.63	1	0	0
AAGTGAATTATGCCGCTGATACAGATGCAGTAGCGACACTGTTTAGTACAAAGAAAAATTTTACTAATGA	conserved hypothetical protein	MW1375	MW2	0	0	0	0	0.42	0.0279	0_tan	0	0.38	0.57	0.22	0.9	0.23	0.14	1	0.92	0.33	0.92	0.9	0	0
AAGTTGAAAAAGTACACGGTCAAAAAAGGGCGCGTACTTATGAACAAGTTAATCATATTCTCACTCTCGA	hypothetical protein	SAV1994	Mu50	1	0	0	0	0.45	1	0_tan	0.0047	0.04	0.03	0.01	0.16	0.02	0	0	0.13	0	0	0.29	0	0
AAGTTGAAACCTAACTGTCATTGCACATCTAAATATCTCAATAACTTCATTGAACAAGATCATCGTCACA	probable transposase	SAVP024	Mu50	0	0	0	0	0.46	0.2722	0_tan	0.0149	0.44	0.33	0.45	0.18	0.71	0.26	0.33	0	0.2	0	0	0	0
AAGTTGTGTTATCCAAAATCATGGAGCGAGAGAGCAAAGAGCGTGAAATGGCTAGGCAACGACGTAAAGA	conserved hypothetical protein	SA0350	COL	1	0	0	0	0.23	0.8004	0_tan	0.038	0.92	0.9	0.87	0.96	0.93	0.88	1	0.8	0.83	0.88	0.94	0	0
AATAAAGGAGAAATTAGAAATGGCGAGTCCGGAAGTGATCAAAAATTAACTAGCGGTCAAGTTGAAAGTT	hypothetical protein	MW1440	MW2	1	0	0	0	0.34	0.6589	0_tan	0.0001	0.84	0.87	0.76	0.98	1	0.55	1	0.89	0.6	1	0.92	0	0
AATAACTAGCCATCTTTTTTGTAGCTTTGGTTGTGAAAAGACGGGTAGTTTTAACAGCTTCTGTTGTTAA	hypothetical protein, similar to gallidermin precursor [Genomic island nu S	MW1766	MW2	1	0	0	0	0.39	0.0006	3_red	0	0.24	0.52	0.17	0.8	0.19	0.02	0.85	0.9	1	0.5	0.43	1	0
AATAAGTTTTAAGTTAGGAATAAAGTACTTATTAACGATAAAAAGAGGGAACATAGAAAAAGATAGGTTT	hypothetical protein	MW1769	MW2	1	0	0	0	0.41	0.0282	0_tan	0	0.55	0.74	0.39	0.93	0.14	0.63	0.95	1	1	1	0.7	0	0
AATAATAAACAAAAGAATTTAATGTCTGTAATTAATCAATGTATTGAACTAGAAAATTTTTCTTACACTG	hypothetical protein	SA0331	COL	1	0	0	0	0.37	0.004	2_orange	0	0.03	0.16	0	0.35	0	0	0.46	0.25	0.14	0.17	0.25	1	0
AATAATATTACTTTTTCAAATTTAGCTGAAAAGATAAATCAAGAATTTGAAATTAATGATATTACTAAAG	epidermin biosynthesis protein EpiB	SA1877	COL	1	0	0	0	0.21	0.0195	1_yellow	0.0049	0.13	0.27	0.14	0.31	0.02	0	0.3	0.86	1	0	0	1	0
AATAATCAAAGTGATAATGCTAAATATAAAATTTTAAGTTACTATGTACTTATGTATAAATCAGTGAAAG	hypothetical protein	SA1684	COL	0	0	0	0	0.59	0.0159	1_yellow	0	0.65	0.86	0.49	1	0.48	0.62	1	1	1	1	0.91	1	0
AATAATCAATATCAGAAAAATATTGGTTACCATGATGATAAATTAGGCAAATTATTTAAAGAAAAAGACC	putative exported protein	SAR1894	MRSA252	1	0	0	0	0.33	0.7248	0_tan	0	0.7	0.73	0.56	0.94	1	0.12	0.94	0.67	0.25	1	0.78	0	0
AATAATGCAAGTATTCAAACGCAAATAGAAATATTAAAATCACAAAATAGTTTCCCTAAAAATCTTTCAT	hypothetical protein	SA2272	N315	0	0	0	0	0.35	0.5123	0_tan	0.2435	0.63	0.57	0.64	0.54	0.08	1	0.8	0.14	0.27	0.2	0.4	0	0
AATACGCTTCTCAAAACGGAGTTAACGGCTTTCCTAGATTACGAAAAGTATGATCGCATTGGTTTTAACA	transposase	SAV0415	Mu50	0	0	0	0	0.35	0.7251	0_tan	0.1071	0.06	0.04	0.07	0	0.02	0	0	0	0.54	0	0	0	0
AATACGTTCTTTGCAAGCATAGTTGTTGGTTTAATGTACTCTGTATTTTCAGCAAATACAACTTACGATA	putative membrane protein	SAR2421	MRSA252	0	0	0	0	0.21	0.8592	0_tan	0.371	0.8	0.78	0.76	0.82	1	0.51	0.84	0.44	0.64	0.57	1	0	0
AATACTAATATGACATATGATGTTGTTTTCACTAGTGGTGCAACGGAATCTAACAATATCGCGCTTAAAG	aminotransferase class-V protein	SAR1794	MRSA252	0	0	0	0	0.16	1	0_tan	0.1123	0.99	0.98	0.97	1	1	0.95	1	1	1	1	0.95	0	0
AATACTCGAAATAGTCAAAAGTGATAAAATCATTGAACGTGTTGTAGCACGTGTTAACCAAGAAAATCAA	cassette chromosome recombinase B	MW0038	MW2	0	0	0	1	0.25	1	0_tan	0.0598	0.06	0.07	0.09	0.02	0.05	0.03	0.07	0.25	0.14	0	0.08	0	0
AATAGAAAAATTACTAAATGATAAATCAATATCTAATTATAGAATTAATCAAGACACTGATGTTTCTTAT	hypothetical protein	SA1332	COL	0	0	0	0	0.08	1	0_tan	0.2466	0.99	0.98	0.97	1	1	0.98	0.97	1	1	1	0.91	0	0
AATAGAAGAGTTTACAAAAGGCAATATGAAATATATACTAAAAGTAACAAGAATTTCGTTTGTAAACGCA	hypothetical protein	SAR0705	MRSA252	0	0	0	0	0.21	0.7207	0_tan	0	0.78	0.81	0.64	0.97	1	0.29	0.93	0.94	0.55	1	0.94	0	0
AATAGAATTTTAGGTATTTCAATTAATTTACCAGAAGGACAAACATTTACTTTCCATGACTTGAACCGTC	conserved hypothetical protein	SA0044	COL	0	0	0	1	0.39	1	0_tan	0.0002	0.04	0.04	0	0.16	0.04	0.04	0	0	0	0	0.2	0	0
AATAGACAAGTTTATCAGAAATTCATAAACGACCATTCAAAAGAACACGCAAAAGAAACTATAAGAAAAA	integrase	SA1810	N315	1	0	0	0	0.1	1	0_tan	0.476	0.96	0.96	0.97	0.95	0.97	0.97	0.96	1	1	0	1	0	0
AATAGATGCAAAAAACACTGATATTAAAGTTTATAGAGTCGATAATGCTAATGATTTATCTGAAAGTTAT	fibrinogen-binding protein	SAV0811	Mu50	0	1	1	0	0.26	0.3378	0_tan	0.8712	0.71	0.63	0.67	0.65	0.35	0.98	0.63	0.25	0.2	1	0.45	0	0
AATAGCACAAGCAGACAAACAAGAACAAAGAAGTAAAGTATATGAAAATCTTTACAATGGCAATGTTGAT	traF protein	VRA0013	Michigan	0	0	0	0	0.46	0.2607	0_tan	0	0.64	0.73	0.53	0.94	0.78	0.42	0.93	0.71	0.3	1	1	0	0
AATAGCGAAACAAGAATACTTAAGAATATTACCGCACATGCAAGAATTGCCAATTTCCAACTTAGATAAA	hypothetical protein	MW1909	MW2	1	0	0	0	0.25	0.0066	1_yellow	0	0.34	0.55	0.18	0.83	0.28	0.15	0.91	0.93	0.73	0.57	0.64	1	0
AATAGGTTTTAATGTACACAAGGTGTTTAAAATGCCCGAAAAACAGGCACTATTTGAAGATTTGTACCAT	hypotehtical protein	SAVP005	Mu50	0	0	0	0	0.33	0.0063	2_orange	0	0.29	0.51	0.01	0.94	0.32	0.12	0.85	0.62	0.2	0.63	0.91	1	0
AATAGTAAAAAAGTTAATCACAAAGTAGAATTAAGCATTACTAAAAAAGATAATCAAGGTATGATTTCAC	exotoxin, putative	SA0470	COL	1	1	0	0	0.37	0.8371	0_tan	0.0001	0.78	0.81	0.68	0.93	0.42	0.97	0.91	1	0.78	1	0.56	0	0
AATATAATTTTAACGACAACATTATTACTATTAGGTACTGTATTACCTCAAAATCAAAAACCAGTATTTA	exotoxin 1, putative	SA1178	COL	1	1	0	0	0.24	0.4388	0_tan	0.0064	0.8	0.85	0.75	0.91	0.1	1	0.93	1	1	1	0.43	0	0
AATATACACTCCCATTTGAAAACTTTTATTCACAATAAACTACTTTATTATCAATGTCAAACCATAAAAG	hypothetical protein	SAP026	N315	0	0	0	0	0.28	0.5885	0_tan	0.0001	0.75	0.79	0.66	0.91	1	0.24	0.94	0.93	0.29	1	0.76	0	0
AATATCTAATATCAACAAGTCATTTAATAAAAGATGTGTTCTAAAAAATATTTCGTTCGATATTGAACAA	ABC transporter, ATP-binding protein	SA1352	COL	0	0	0	0	0.28	1	0_tan	0.0175	0.85	0.86	0.79	0.92	0.27	0.98	0.96	1	1	1	0.33	0	0
AATATCTAGAAGCACGTTTCGGACCTAGCATTCGTGTTATTGGCTCATTATTATTTGTCGTTTATCATCT	sodium:solute symporter family protein	SAR0311	MRSA252	0	0	0	0	0.05	0.4802	0_tan	1	0.99	1	0.99	1	1	0.98	1	1	1	1	1	0	0
AATATTACTTGAATCATAAACAATCTTATAGAGAAGTTGCAGAACACTTTAATATCTCATACGGTCAATT	putative insertion element protein	SAR0962	MRSA252	0	0	0	0	0.26	1	0_tan	0.0396	0.79	0.8	0.74	0.87	1	0.61	0.86	0.73	0.64	0.63	0.67	0	0
AATATTGCTGATGCCAATCGTATCAACGTCTTTAAGACTAATGGTTTCTCTAAAAGTTTAGGTGAACACC	transcriptional regulator, GntR family	SA0249	COL	0	0	0	0	0.06	0.7609	0_tan	0.0591	0.94	0.96	0.92	0.98	0.86	1	1	1	0.95	1	0.89	0	0
AATATTTTTGGTCAATTATTGAAAATTTAAAAGAAGATAATCGAACGATACTCTATACATCGCACTATAT	ABC transporter, ATP-binding protein	SA1352	COL	0	0	0	0	0.21	1	0_tan	0.2834	0.86	0.87	0.84	0.9	0.56	0.98	0.96	1	1	1	0.29	0	0
AATCAAAGACAGGTTATTATTTCACCCTAGACTCGAAAAAGAGTTAAGAGCACAAGGTATCGTACATTAT	hypothetical protein	SA1799	N315	1	0	0	0	0.25	0.1864	0_tan	0	0.67	0.76	0.6	0.88	0.51	0.82	0.8	0.7	0.64	0.6	1	0	0
AATCAAATGGCTAATAATTTAAAAATTTCAGTTACTGCTTATAGAAATAAAGAAAGAGGAATAACACCAT	hypothetical protein	SAV0785	Mu50	1	0	0	0	0.31	0.0194	1_yellow	0	0.17	0.34	0	0.68	0.24	0.13	0.61	0.2	0.27	0.29	0.38	1	0
AATCAATACTGTTATATTTGAGAGCTACTTAGCCAAAGCTAAAAGACCAGACACTATGCATATTTCAACT	putative ATP synthase protein I	SAR2198	MRSA252	0	0	0	0	0.09	0.4977	0_tan	0.4562	0.99	1	1	0.99	1	1	1	1	1	0.86	1	0	0
AATCACAGAGGAAGTCACTGAAGATACTGAGTTTGATTGTCTAGTAGAACTAAACGATATTGAAGGTTTT	hypothetical phage protein	SAR1535	MRSA252	1	0	0	0	0.29	0.2611	0_tan	0.0021	0.7	0.62	0.58	0.82	0.98	0.33	0.88	0.45	0.31	0.57	0.62	0	0
AATCAGAGTAGTCTGGGTGTAGTGACATACATTACAAATAAATTAAAGTCGACGTTGAAGCAACACATAA	hypothetical protein	SA2588	COL	0	0	0	0	0.08	0.7868	0_tan	0.0498	0.94	0.93	0.9	0.97	0.84	1	1	0.94	0.95	1	0.81	0	0
AATCATAAGGATATTGATATGATTCTAAAGAGATTATATAATAGTGGTAACATAATATATAAAGTTAGGT	hypothetical protein	MW1197	MW2	0	0	0	0	0.32	0.0007	3_red	0	0.2	0.45	0.06	0.78	0.1	0	0.76	0.8	0	1	1	1	0
AATCATAGACACAGATAAGTTCGTCAATCTGTTAATGAATTATGATGTGATAGAGTTAAGTGAGGATAAA	hypothetical protein	SA0055	COL	0	0	0	1	0.36	0.0032	2_orange	0	0.09	0.28	0	0.6	0.16	0.02	0.54	0.2	0.23	0.44	0.3	1	0
AATCATCAAATAAAGTTGAAAATAATACTGCTACTGATGAAAAGGCTGAAAGTAAAGATTCGAAGGTTGC	putative DNA-binding protein	SAR0403	MRSA252	0	0	0	0	0.32	0.3394	0_tan	0.0307	0.91	0.85	0.83	0.94	1	0.73	0.94	0.78	0.79	1	0.63	0	0
AATCATTATGGTTCATTAATACCGTTAACGCCTTTAGATAGTAGTTTATTGAGAAAAGAACAAAATGATA	conserved hypothetical protein	SA0908	N315	0	0	0	0	0.02	0.4723	0_tan	0.4979	0.99	1	0.99	1	0.98	1	1	1	1	1	1	0	0
AATCATTGCCATACGATATCGATGGTATTGTGATAAAGGTTAATGATTTAGATCAGCAGGACGAAATGGG	DNA ligase	SAR1996	MRSA252	0	0	0	0	0.31	0.8112	0_tan	0.3343	0.89	0.88	0.86	0.92	1	0.67	1	0.75	0.88	0.6	1	0	0
AATCTATTGTTGAATGTAACATAGCCAAAAACAAAGACGGCGAAACCGGAATAATTGAATTCGAGTATTA	prophage L54a, replicative DNA helicase, putative	SA0343	COL	1	0	0	0	0.48	0.6624	0_tan	0.0012	0.03	0.05	0	0.15	0.03	0	0	0.33	0	0	0	0	0
AATCTCTAATTGAAGATGCTAAAGAAAAAGCGAATCAAAAAATTAAAGCAGCAACAAAAGAAGCTGACGA	MutS family DNA mismatch repair protein	SAR1117	MRSA252	0	0	0	0	0.37	0.7924	0_tan	0.7824	0.91	0.89	0.89	0.92	1	0.75	1	0.78	0.7	0.8	1	0	0
AATCTGGCAATATAAAAGGTAACTCTGAAGAAACAAGTACAGTATCTAATATAAGTTATGAAATAGAAAA	conserved hypothetical protein	SA2496	COL	0	0	0	0	0.22	0.0616	0_tan	0	0.27	0.4	0.13	0.61	0	0.04	0.47	0	0.95	1	0.95	0	0
AATCTTTTAAAATGATTGTAGTTATTGCATTTTTAGGTGCCATTGTTGTTACTATATTAGTTGTTGCGCT	lipoprotein	SA0110	N315	0	0	0	0	0.13	1	0_tan	0.2214	0.95	0.94	0.93	0.97	0.85	1	1	1	0.95	1	0.85	0	0
AATGAAAAAAGAAAATGGTGAGCAACAATTTTATCATTATGCCAGCTCTGTTAAACCTGCTAGAGTTATT	conserved hypothetical protein	SA0976	N315	0	0	0	0	0.19	0.6864	0_tan	0.0989	0.87	0.84	0.81	0.91	0.68	1	1	0.5	0.5	1	0.86	0	0
AATGACCAAAACCAAACAAATAATAACCAATCAAGTAATAATCAAAAATCAAGTTACGTTGCACCATATT	ORFID:SA2158~hypothetical protein, similar to TpgX protein	SA2158	N315	0	0	0	0	0.04	0.2172	0_tan	0.2339	0.98	1	0.98	1	0.97	1	1	1	1	1	1	0	0
AATGATCAAGCTGAAATGGATAATGAGTCGGAAGACATTCAACATCATGATATTGACAATAACAAAGCCA	putative lipoprotein	SAR1881	MRSA252	0	0	0	0	0.23	0.5804	0_tan	0.0002	0.91	0.94	0.85	0.99	1	0.71	1	0.92	0.82	0.88	1	0	0
AATGATTAACCAATTTAGTATAGGTATTCGTATTTCAGACCAACAATTCTTTAAATTTAGATTTATTCAA	diarrheal toxin	SA0276	COL	0	0	0	0	0.13	0.7924	0_tan	0.1849	0.92	0.93	0.9	0.95	0.8	0.98	1	0.93	1	0.71	1	0	0
AATGATTGACCAGGTAGATGATATGTATATCACAGTAATAGATGGAAAGTTTCAAGGAGACACATTCTTT	trimethoprim resistant dihydrofolate reductase	VRA0004	Michigan	0	0	0	0	0.41	0.7145	0_tan	0.1262	0.73	0.7	0.66	0.79	0.84	0.54	0.75	0.71	0.85	0.43	0.6	0	0
AATGATTTAAATCAATATGATACAACGCTATTTAATAAAGATAGTAAAGAAGTCAACGACGCGATTGCTA	hypothetical protein	SA0273	N315	0	0	0	0	0.19	0.7796	0_tan	0.0002	0.93	0.94	0.87	1	0.83	1	1	0.92	0.63	1	1	0	0
AATGCCTTGGGACATTATATTCACAGTAGGTGTCATTATATTAGTAGTTATTTTTATAAGGGGATACAGA	putative nitric oxide reductase	SAR0261	MRSA252	0	0	0	0	0.29	0.1684	0_tan	0.0608	0.6	0.49	0.61	0.45	1	0.23	0.26	0.09	0.22	0.13	0.25	0	0
AATGCTAGGTTTCGTTAAAGGTATAGATAATCATTCAAGTAAAGTTATCCGTAATGTTTCTAATGTTGCA	hypothetical protein	SAV0901	Mu50	1	0	0	0	0.28	0.2789	0_tan	0.0046	0.63	0.54	0.68	0.46	0.63	0.78	0.13	0.2	0.42	0.13	0.79	0	0
AATGGGCAGGCCTTTATGATCATCGCATGTTTCAAGTTGTAGCCAAATACGATGCGGAAATTGTTTTAAT	dihydropteroate synthase	SAR0515	MRSA252	0	0	0	0	0.17	0.0803	0_tan	0	0.84	0.93	0.79	0.99	1	0.67	1	0.89	0.64	0.89	1	0	0
AATGGTCATAGAGGGGTATGCGTTAAAGTTTGACACTTGGTCTGAAAATCTTGGTGGATTCAAAGAAACG	hypothetical protein	MW1905	MW2	1	0	0	0	0.32	0.1211	0_tan	0	0.64	0.76	0.41	0.95	0.6	0.37	0.96	1	0.86	0.8	0.93	0	0
AATGGTTGATACAGCAATAACTGCCACATACAATCCAACAGATCGTAAAAAACTTGAGCCACAAGATATT	putative short chain dehydrogenase	SAR2567	MRSA252	0	0	0	0	0.19	0.2672	0_tan	0.006	0.95	0.98	0.93	1	1	0.82	1	1	1	1	1	0	0
AATGTAACTAACACTGACGACCACCAAGCTAAGACAAAATCAGCTCAACAAGGAAAAGTTAATAAAGCTA	fmtB protiein	SA2150	COL	0	0	1	0	0.36	0.3224	0_tan	0	0.51	0.6	0.29	0.84	0.35	0.18	1	0.5	1	1	0.6	0	0
AATGTACTTAACTTATATCTGCTTAGTTTCATTGTTAACAATATTATTACTAGCAATATCTAACATGTAT	hypothetical protein	SAV0787	Mu50	1	0	0	0	0.32	0.2031	0_tan	0.0002	0.8	0.88	0.73	0.95	1	0.41	1	0.71	1	0.67	0.79	0	0
AATGTATGAAGTGAAGAAATCTTATACTGACTTGGAAAAAGGCCAGTATTTAAAGTCAGGTAAACGTGTT	hypothetical protein	MW1903	MW2	1	0	0	0	0.22	0.0024	2_orange	0	0.5	0.72	0.2	1	0.44	0.27	0.97	1	0.8	0.91	0.94	1	0
AATGTTAAGTTTGAGGATATGCTAGACATCAAATTTTATTCGTTGGATGATATAAATGGTTTGTCACTGT	portal protein	MW1906	MW2	1	0	0	0	0.42	0.3753	0_tan	0	0.31	0.39	0.2	0.66	0.13	0.16	0.85	0.92	0.58	0.33	0.33	0	0
AATTAAAATCAGTTATACAACAAATTAAAACCAATCCAAACTCTCGACGTCACATTGTTTCAGCATGGAA	thymidylate synthase	VRA0005	Michigan	0	0	0	0	0.39	0.0147	1_yellow	0	0.45	0.25	0.51	0.04	0.58	0.25	0	0	0.54	0	0	1	1
AATTAGAAGCTTTATTAAAAAAATACTATGAACATTCAATCGAAAAAATAGTATTTGCCGACGATAGTGG	putative histidine kinase	SAR2481	MRSA252	0	0	0	0	0.3	1	0_tan	0.0968	0.84	0.83	0.79	0.89	1	0.55	0.93	0.56	0.67	0.57	1	0	0
AATTATTAGGTACTATTATTTGGAGTATTGCTACATTTTATTATTCAAGAATGATGGAAATAATGAATTT	hypothetical protein	SA0878	COL	0	0	0	0	0.52	0.6542	0_tan	0.1124	0.98	0.96	0.92	0.99	1	0.83	1	1	1	1	0.75	0	0
AATTATTTTTAGAAATAGATATAGACAATCATAGATATATATGTTTAAGCTCAAAGTTTAATTTTGAAAA	hypothetical protein	MW1749	MW2	1	0	0	0	0.2	0.0595	0_tan	0.1297	0.12	0.23	0.14	0.23	0.02	0	0.05	0.86	1	0	0.08	0	0
AATTCACTCTAAAATGATTATTGAGACAAATAATAGCAATATGGAATCTAGAGGAATGGTGCTCTATATA	hypothetical protein	MW2406	MW2	0	0	0	0	0.35	0.0538	0_tan	0	0.38	0.54	0.16	0.92	0.19	0.02	0.91	1	0.14	1	1	0	0
AATTCGAGGACGTCAAGTCATCATAAATAAATTTGCAGTTGAACTTAATAAAGATATTTATACAGGGCTA	conserved hypothetical protein	SA2300	COL	0	0	0	0	0.08	0.115	0_tan	0.1117	0.97	1	0.97	1	0.95	1	1	1	1	1	1	0	0
AATTGAATGAAATTTTACCAAATACAATAAGAGTAATACATGAATATAATTATTTTGACTATTATAAGAA	tetracenomycin polyketide synthesis O-methyltransferase TcmP, putative	SA2009	COL	0	0	0	0	0.3	0.0156	1_yellow	0	0.27	0.46	0.16	0.71	0.04	0.02	0.84	0.91	1	1	0	1	0
AATTGATACAGGTAGAATTACATATGATATATCAGAAAATAAAATTAAAACTATTGTTTTACAAAAATAG	hypothetical protein	SAS039	N315	0	0	0	0	0.61	1	0_tan	1	0.85	0.85	0.86	0.84	0.97	1	0.93	0	1	0.14	0.67	0	0
AATTGATGGGTAGCAGCTTAGGTGGTACGTACTTATGGCCAATCGTTGCGATTTCCAATATTTGTCAGGG	PTS enzyme II	MW0428	MW2	0	0	0	0	0.02	0.4723	0_tan	1	0.99	1	0.99	1	0.98	1	1	1	1	1	1	0	0
AATTGCCGGCTTAAGGTTGGGTGTATTAATGAGTACTGTTGAAACGATACAGCGTATTCAAACAATAGAA	putative aminotransferase	SAR2759	MRSA252	0	0	0	0	0.2	0.3388	0_tan	0.0064	0.8	0.86	0.76	0.91	1	0.58	0.94	0.73	0.64	0.67	1	0	0
AATTGCTATGTATTTTAAAAACCCATCAAGAATACTAGGAAGTTTCTTTATTAAACACCACGGTTATCGT	conserved hypothetical protein	SA0051	COL	0	0	0	1	0.34	1	0_tan	1	0.01	0.01	0.01	0.02	0.04	0	0	0	0	0	0	0	0
AATTGTTGAAAGATAGATTCGAAGATTTAAAGGATAATCATGGTTGGCATTTTGAGGAGTTATATCCACA	hypothetical protein	SAR0373	MRSA252	0	0	0	0	0.28	0.375	0_tan	0.0011	0.73	0.79	0.66	0.88	0.99	0.43	0.9	0.56	0.75	0.56	0.64	0	0
AATTGTTGGCGCATTTTGTAGAGCCTATACGATAGAAGAAGCTATATCAACTTTTATTCCTGACTTATAC	hypothetical protein	MW1408	MW2	1	0	0	0	0.24	0.1263	0_tan	0.0017	0.91	0.83	0.94	0.77	1	0.82	0.69	0.69	0.8	0.8	0.83	0	0
AATTTAAAGAGGGTATGCAACGAGCTAGAAAAGAGTTAGATTATACTGCTAATAGTAATACAGTAGCAAC	hypothetical protein	SA1321	N315	0	0	0	0	0.25	0.6146	0_tan	0.1213	0.89	0.92	0.87	0.95	0.67	1	1	1	1	1	0.64	0	0
AATTTAACTGACAATAAAAACTTTGTAGTTTCTGAAGACAAATTGAATAAGATTGTAGATTCATCGGCAG	extracellular ECM and plasma binding protein	SA0744	N315	0	1	1	0	0.22	1	0_tan	0.7867	0.92	0.93	0.93	0.92	0.77	1	1	1	1	1	0.38	0	0
AATTTAATTAGCCCAACCAGTGGAACGCTTTACTTTAAAGGTAAACCATATGATGATTACGAACCAGAAA	ABC transporter ATP-binding protein	SAR2544	MRSA252	0	0	0	0	0.24	0.7269	0_tan	0.0008	0.78	0.75	0.66	0.88	1	0.29	0.96	0.43	0.43	0.57	1	0	0
AATTTACCAAATCAACAAAGGCGACAAACTAGCACAACTGGTTATCGTGCCTATATGGACACCTGAACTA	putative dUTP pyrophosphatase	SAR2072	MRSA252	1	0	0	0	0.19	0.3307	0_tan	0.0181	0.97	0.93	0.98	0.9	0.99	0.95	1	0.92	1	0.5	0.92	0	0
AATTTCACGTTAGACAATAAACAATCGCTACTAATTCAAGGCTCATTTGGTACAGGTAAATCACACTTAT	hypothetical protein	SAV0869	Mu50	1	0	0	0	0.45	0.0073	1_yellow	0	0.27	0.51	0.13	0.85	0.25	0.24	0.75	0.33	0.67	0.75	0.8	1	0
AATTTCGCAAATGATGACCACCCTAACAACCCTGATAATCCAGACAATCCAAATAATCCGGACAATCCTA	glutamyl endopeptidase precursor	SAR1022	MRSA252	0	0	0	0	0.16	0.4677	0_tan	0.4975	0.99	1	0.99	1	1	1	1	1	0.94	1	1	0	0
AATTTCTACAGACATTGCAAATTGGGGAAACGGGCCACAACATAGAAAAATTGGATCCTCAATTTCTACA	hypothetical protein	SAS1775	MSSA476	0	0	0	0	0.24	0.497	0_tan	0.0002	0.94	0.96	0.88	1	0.91	0.85	1	1	1	1	1	0	0
AATTTTAAAGGTGTTATTGAACAAATTCCGCCAATGTATTCATCAGTCAAGGTGAATGGCAAAAAATTAT	tRNA pseudouridine 5S synthase	SA1114	N315	0	0	0	0	0.17	0.4975	0_tan	1	1	0.98	0.99	0.99	1	1	1	0.82	1	1	1	0	0
AATTTTAGGGCAAATTCATGTAAGTACAATAACACTTTTTGAATTAGGTATTTTATTCTCAGTTGTTGGT	ORFID:SA0579~hypothetical protein, similar to Na1/H1 antiporter	SA0579	N315	0	0	0	0	0.11	0.5815	0_tan	0.026	0.92	0.95	0.89	0.97	0.77	0.98	1	1	1	1	0.88	0	0
AATTTTGAATAGGGATTGCTTAACCACCGAACAAATCGCTAAAGAATTATGTAATAAAGATTGGGAATGA	hypothetical protein	SAS0040	MSSA476	0	0	0	0	0.36	0.0032	2_orange	0	0.16	0.38	0	0.82	0.14	0.1	0.87	0.44	0.3	0.5	0.6	1	0
AATTTTTAGAAATCCTTGGAGAACCAGACTTTAATATGATTTCACATGAGAATATTCAATTGGTCGCAAA	hypothetical protein	MW0375	MW2	1	0	0	0	0.29	0.0007	3_red	0	0.33	0.59	0.13	0.89	0.24	0.12	0.97	1	0.33	0.63	0.69	1	0
ACAAAAAATGGCAGTTTATTATATCAGAAAATAGGGATAAACCCATGCAATAATAGCACGCCTTCGAAAG	hypothetical protein	MW0041	MW2	0	0	0	1	0.44	0.0309	0_tan	0	0.09	0.23	0.08	0.41	0.13	0.02	0.5	0.57	0.22	0.2	0.38	0	0
ACAAAACTAGATACAAATGGTAAACAAACAGAATTTAAACGTCGATTCGCCAATATTAATCCTGAAGTAT	hypothetical protein	SAR0628	MRSA252	0	0	0	0	0.36	0.8057	0_tan	0.0008	0.89	0.88	0.8	0.97	1	0.54	1	0.8	0.67	0.67	1	0	0
ACAAAAGTTGCCAGTTTATATATTATTCACACTGTTTGTTGTGGTTGCGATTGTTTCGAATGTATGGCTT	putative membrane protein	SAR2412	MRSA252	0	0	0	0	0.28	0.5115	0_tan	0.0005	0.84	0.88	0.78	0.97	1	0.63	0.94	0.78	0.75	1	0.9	0	0
ACAAAATGGACATATGTTAGGTCATCATCTATATAATGAAAATAAAAAAAGAGCCATTTTAAATAATAAG	hypothetical protein	MW1201	MW2	0	0	0	0	0.3	0.0395	0_tan	0	0.51	0.67	0.32	0.9	0.62	0.09	0.85	1	0.93	1	0.62	0	0
ACAAAGTAATAAAAAAGCAAAAGCTACAGCTCAAAAGTTAGAAGCAAGCTCAAATAACAATCATGAATAA	ORFID:SA2142~hypothetical protein, similar to multidrug resistance protein	SA2142	N315	0	0	0	0	0.15	0.0325	0_tan	0.2793	0.93	0.99	0.94	0.98	0.83	1	1	1	1	1	1	0	0
ACAAATAAATACAAAGGTCATTAAAGAAAATTATGAGGATGTTTTGCGATTAGCTCATTCTATAAGGGAG	Tn1546, transposase	VRA0035	Michigan	0	0	0	0	0.38	1	0_tan	0.0707	0.01	0.01	0	0.05	0.04	0	0	0	0	0	0	0	0
ACAACAAAAAGAAATGCGAAAGATGATACAGGCAAAAGTACTTCTCTTGTCTTCTACCAAATCAAAATTG	hypothetical protein	SA0072	N315	0	0	0	1	0.1	0	3_red	0	0.65	0.27	0.87	0.01	0.69	0.75	0.04	0.06	0.09	0	0	1	0
ACAACACCTAAATATATTAAGTTTAGACATGATTATAACATCGTGGAATATAATGACGGTACATTCGAAT	fibrinogen-binding protein precursor	SAR1130	MRSA252	1	1	1	0	0.2	0.1467	0_tan	0	0.82	0.9	0.74	0.98	1	0.6	0.96	0.82	0.65	0.86	1	0	0
ACAACATTAAATTAGACGAAACTTGTAAGGGAGATATTAACATAACATCATGTAATTCTGAATACTTTTT	hypothetical protein	SA1635	N315	0	0	0	0	0.26	1	0_tan	0	0.79	0.79	0.65	0.94	0.37	1	0.96	0.79	0.38	1	0.67	0	0
ACAACTTTATGCCATCGGTATTAACTGCAATAAAGATTGCTCGTATCTTCAATGAAAAGGTGGAAACTAT	putative DNA-binding protein	SAR0346	MRSA252	0	0	0	0	0.14	0.3173	0_tan	0.3248	0.94	0.97	0.94	0.97	0.99	0.91	1	1	0.88	0.8	1	0	0
ACAAGAAAGTTAAAAACGCTGATTTTAATATTTGTTGCCACAATTGCATTAAGTGGTTGTGCTAATGATG	transport system extracellular binding lipoprotein	SAR0953	MRSA252	0	0	0	0	0.07	0.4664	0_tan	1	0.99	1	0.99	1	1	0.98	1	1	1	1	1	0	0
ACAAGCTATCTCAAACGGAACCCAAAATGACATTAAATTGTATATTCGTGATCCGCAAGGTGATTATTTA	hypothetical protein	SA1771	N315	1	0	0	0	0.13	0.6216	0_tan	1	0.97	0.99	0.98	0.98	0.99	1	0.96	1	0.94	0.88	1	0	0
ACAAGTTTCTAGCAAAGCTGATGCTTCTTCATCCTATTTAACGGAAAAGGAACGTAACTTAGGAGCGGAA	hypothetical phage protein	SAR1548	MRSA252	1	0	0	0	0.3	0.6792	0_tan	0.0924	0.85	0.81	0.88	0.77	1	0.77	0.87	0.5	0.45	0.7	0.8	0	0
ACAAGTTTGCCATTTCCTGCAGATATAACTGTTAGAATGCATAACCCTAATAACATTGTTTTTGATAAAA	capsular polysaccharide synthesis enzyme Cap8J	MW0133	MW2	0	0	1	0	0.23	0.8158	0_tan	0	0.9	0.88	0.77	0.99	1	0.44	0.96	1	0.75	1	1	0	0
ACAATGGTTGAAGGTATTCAACAAACAGCCAAAGCCGAACATAATGTGAAACTAATCAAAAATACTAATG	serine protease	SAR1902	MRSA252	1	1	0	0	0.05	1	0_tan	0.4825	1	0.99	1	0.99	1	1	1	1	1	1	0.92	0	0
ACAATTGCCTACGTAGATGATGAAGGTGGAGAGGTTGTTTTTAATTATACTAAACCAGGAAGTGAAGATT	conserved hypothetical protein	SA0297	COL	0	0	0	0	0.14	1	0_tan	0.0995	0.99	0.98	0.97	1	1	0.92	1	1	1	1	1	0	0
ACACACCCTAATCACGTTAAATGTGAATAAAGTGTGTCTAAAAAACAATACATTGCAAATTGAATTGTAA	hypothetical protein	SA2380	COL	0	0	0	0	0.23	0.4085	0_tan	0.0006	0.9	0.94	0.86	0.99	0.61	0.98	1	1	1	1	0.91	0	0
ACACACTATTGAAGAAGAATATAATGAGAATATTAGATTAAATTATAAGTGTGGTGCATCACGATGGTGA	conserved hypothetical protein	SAV1646	Mu50	0	0	0	0	0.24	1	0_tan	0.4144	1	0.99	0.99	1	1	0.97	1	1	1	1	1	0	0
ACACATTAGGCTATAAGCATCAAGGCTTTCCAGTCGGTTATGATTCAATGAGTCAAATCCGTTGGTTATC	FemAB family protein	SAR2501	MRSA252	0	0	0	0	0.23	1	0_tan	0.0644	0.97	0.96	0.93	0.99	1	0.86	1	0.91	0.89	1	1	0	0
ACACGATATTAAGTTAATTACCAATGATCCAGTAGTTGACGTGGATAGAGCAAATCAAAATGTAACGACT	nitrite reductase large subunit	SAR2489	MRSA252	0	0	0	0	0.18	0.8595	0_tan	0.2866	0.79	0.81	0.76	0.83	1	0.55	0.85	0.62	0.5	0.67	1	0	0
ACACTAAATAGTGAAAAATTGGCACAGGAAAGGGTGATTGGTGCTAATGTTTGGGTAGATGGTATTCAAA	enterotoxin H	MW0051	MW2	0	1	0	0	0.34	0.0107	1_yellow	0	0.35	0.55	0.15	0.94	0.27	0.17	0.88	1	0.5	0.67	0.91	1	0
ACAGAGAAAAAAATCTCACAAAGCTTACAATTTAATTTTCTTACTGAGCCAAATTATGATAAAGAGACAG	putative leukocidin F subunit	SAR2107	MRSA252	1	1	0	0	0.34	0.5068	0_tan	0.0131	0.82	0.87	0.78	0.93	1	0.48	0.85	0.67	0.78	0.67	1	0	0
ACAGATTAGTGGCATTCGCCTTTATACCAATGATAGAAGGTAAAATTTGTATTAACCATATTGACGGGAA	hypothetical protein	SAV0865	Mu50	1	0	0	0	0.44	0.0046	2_orange	0	0.03	0.19	0.01	0.42	0.13	0.02	0.38	0.14	0	0.2	0.3	1	0
ACAGCTAGAGTCGTCATTTTATAAATTGACACCAGGCAGACAGCATCAATACATTTATCACATTGGACAA	conserved hypothetical protein	SAR2539	MRSA252	0	0	0	0	0.26	0.4786	0_tan	0.0298	0.87	0.91	0.84	0.95	1	0.7	0.93	0.92	0.67	0.83	1	0	0
ACAGTGAATTTTACAGTCCTATGATGGCTAATATGAATGAACATGAATTAAGGGCTATGTTAAGAATGAT	hypothetical protein	SAV0880	Mu50	1	0	0	0	0.22	0.7481	0_tan	0.0003	0.69	0.72	0.6	0.85	0.6	0.74	0.77	0.75	0.79	0.63	0.87	0	0
ACAGTGGTTGATGGTATTCAACAAACAGCCAAAGCCGAAAATACTGTTAAACAAATTACAAATACAAATG	serine protease SplF	MW1752	MW2	1	1	0	0	0.15	1	0_tan	0.1741	0.99	0.99	1	0.98	1	1	1	1	1	1	0.33	0	0
ACATACACTTTTCAAACCAATTGTATATGGATTTGAAAGCTTTTTGAAAGGTAGTACACTAATTTTTACA	conserved hypotehtical protein	SA1105	N315	0	1	0	0	0.16	1	0_tan	0.4599	0.91	0.92	0.9	0.93	0.85	1	0.93	1	0.58	0.5	1	0	0
ACATACTTAAATATTTCAAAAAATCAAGGTGGTACGCCATATTTCAAACCATTACATATGGTGCTACGAT	putative membrane protein	SAR0931	MRSA252	0	0	0	0	0.14	0.2368	0_tan	0.0141	0.88	0.93	0.85	0.96	1	0.75	1	1	0.65	0.91	1	0	0
ACATATTACACATTTGTAGATAAATTTGTGAGTGCAGTGCGTAAAGAATATCCTAATGCACTATTACATT	putative malolactic enzyme	SAR0824	MRSA252	0	0	0	0	0.28	0.6002	0_tan	0.0132	0.77	0.72	0.67	0.84	1	0.29	0.9	0.33	0.36	0	1	0	0
ACATATTATTAAAGATTTAATTGTTGCGACACTACGCGCAATTGTGCAATTAATCATTTTGGGATTTTTG	conserved hypotehtical protein	MW2377	MW2	0	0	0	0	0.17	0.668	0_tan	0.389	0.87	0.89	0.86	0.9	0.6	0.98	0.96	1	1	1	0.67	0	0
ACATCAGTTATGACCATGAGTATGTTGGGCTATTTATTATATTACTAGGTGTTGTACTTCTTAAAGTTTT	putative membrane protein	SAR1863	MRSA252	0	0	0	0	0.36	1	0_tan	0.0003	0.68	0.69	0.58	0.85	1	0.06	0.92	0.2	0.13	0.2	1	0	0
ACATCGCAGATATGATAATCAAGGCGATCATATAAGAATAAAAATGTTTGACGACAGATTAGAAATTAGT	hypothetical protein	SAR2299	MRSA252	0	0	0	0	0.23	1	0_tan	0.0021	0.75	0.74	0.65	0.86	1	0.3	0.95	0.5	0.42	0.5	1	0	0
ACATCGTCGACATCTACTAAACTTGTTGACTATATTAATGTATCTAAAAGGTATAATCCACCATTAAATG	hypothetical protein	SA1828	N315	1	0	0	0	0.27	0.7631	0_tan	0.5431	0.53	0.5	0.53	0.49	1	0.09	0.3	0.09	0.46	0	0.2	0	0
ACATGATAGTGTGAAATTAGGCACAAGTATCGTAGACATCGTTGCTAACGGTGTGGGTTTACTAGGTAAA	antibacterial protein (phenol soluble modulin)	SA1187	COL	1	0	0	0	0.1	0.0251	0_tan	0.0002	0.91	0.98	0.89	1	0.77	1	1	1	1	1	1	0	0
ACATTAAGCAAATAGATGAAACCGAAGATGAGTTAGAGAATTATAGTATATTGAGAAAGCTTGGATTTAC	ABC transporter permease	SA0617	N315	0	0	0	0	0.12	0.664	0_tan	0.0257	0.97	0.98	0.95	1	0.89	1	1	1	1	1	1	0	0
ACATTAGAAATTAGATATTTCTTGTCATCTCTTTTTTATAACTCAAATGAACTTATGTTTACAAATTACA	hypothetical protein	MW1780	MW2	0	0	0	0	0.28	0.5151	0_tan	0.0003	0.92	0.96	0.87	1	0.63	1	1	1	1	1	1	0	0
ACATTCAAAGATTCAACAGGACGTAAACATACACACATAACTAAAGCTAAGAGTAATCAAAGGTTTACAG	hypothetical phage protein	SAR2071	MRSA252	1	0	0	0	0.1	1	0_tan	0.1228	0.98	0.98	0.96	1	0.99	0.95	1	1	1	1	1	0	0
ACATTGCCGAATGGTTGGACATCAAATTTAACAAAAGCGGATAAGAATAATGGCTCATTATCTATTACAG	Cell wall associated fibronectin-binding protein	SA1472	COL	0	1	1	0	0.31	0.1593	0_tan	0	0.44	0.56	0.32	0.73	0.26	0.13	0.79	0.92	1	0	1	0	0
ACCAACAACACAACGGACAAACTCAAACTGGTAATAATCCGTTCGACAATACCGAAGAAGACTTTTCTGA	prophage L54a, single-stranded DNA binding protein	SA0339	COL	1	0	0	0	0.56	0.3239	0_tan	0	0.35	0.46	0.08	0.83	0.53	0.14	0.71	0.56	0	0	0.7	0	0
ACCAACGAAATAAAACTTTCAAAGTGTTTCTGCTTGGTGACGATAAAAATAAATATAAAGAAAAAACACA	exotoxin 13	SA0389	N315	1	1	0	0	0.18	0.0727	0_tan	0	0.88	0.95	0.83	1	0.69	1	1	1	1	1	1	0	0
ACCAGATCTTCAAAAAATGGCTGTGGAACAAGTTGTAGAGCAAGCAGAATTAATGGCAAGTCAGCAATAA	hypothetical protein	SA0035	COL	0	0	0	1	0.31	0.1282	0_tan	0	0.63	0.74	0.44	0.97	0.55	0.51	0.91	1	0.85	0.8	0.93	0	0
ACCCAAATGATACAGAGATTGGTTTTTATTCTCCTGAAACATTCTATCAAAGAAGCGAAAAAGTAATAAG	hypothetical phage protein	SAR1505	MRSA252	1	0	0	0	0.32	0.046	0_tan	0.0047	0.82	0.67	0.82	0.61	0.98	0.6	0.5	0.56	0.77	0.57	0.4	0	0
ACCCTAAAAATGATCCGATATTTTTAGAAAAATCAAATTCAGATGCTGTAAAGCCATATATTAATATTGT	hypothetical protein, similar to lactococcal lipoprotein	MW0418	MW2	0	0	0	0	0.08	0.2354	0_tan	0.4979	0.98	1	0.98	1	0.96	1	1	1	1	1	1	0	0
ACCCTATTAGAGAAGAATATGTAGAGGGAGAAACAGACCCGATATATAAAAGAGAGTATAAGCATTTTTA	conserved hypothetical protein	SA1640	N315	1	0	0	0	0.28	0.704	0_tan	0.0022	0.82	0.79	0.71	0.9	0.54	0.98	1	0.6	0.31	0.4	1	0	0
ACCCTCTTTACACCTTATATGATGGAATCACTCTCTTCCCTAGGTGTGAAACCAGACATTATCGATTTAA	hypothetical protein	SA1620	N315	0	0	0	0	0.05	1	0_tan	0.4979	0.99	0.99	0.98	1	1	1	1	1	0.85	1	1	0	0
ACCGATTGGTGTGATCTCGCTTTTGTGACGAAGCTAGTCCTTGGACAGTCAGAACAGCCACGTTGGAAAG	ORFID:SA0067~hypothetical protein, similar to kdp operon sensor	SA0067	N315	0	0	0	1	0.28	0.0101	1_yellow	0	0.73	0.53	0.93	0.02	0.78	0.85	0.15	0.2	0.36	0.2	0.1	1	0
ACCGCTTAGTACTTGATAAAAATAAGCATGTTGTATCTGAAACGACAGACTCAAAAGGCCATGCTACTTA	putative lipoprotein	SAR2763	MRSA252	0	0	0	0	0.16	0.0882	0_tan	0	0.83	0.92	0.77	0.98	1	0.54	1	0.89	0.8	1	1	0	0
ACCGTCATATTAAAGTAAGAAAGACAAGATATCAAAGTATCAATACGGCAAAAAATACACTCAAAGGCAT	probable transposase	SAVP014	Mu50	0	0	0	0	0.18	1	0_tan	0.0063	0.97	0.97	1	0.93	1	0.96	0.92	0.92	1	0.86	1	0	0
ACCTATGAATGATAATGGCTATGATATCAGCAATTATTTAGAAATCAATGAAGCCTTTGGAACGATGGAT	alpha-glucosidase	SA0433	N315	0	0	0	0	0.13	0.4215	0_tan	0	0.91	0.95	0.86	1	0.64	0.98	1	1	1	1	1	0	0
ACCTCTCTTTTTTAAATGTAACCTCAATTATACAACAAATAAAAAAATTAGAAAATAGATTATTCAAGAA	hypothetical protein	MW1234	MW2	0	0	0	0	0.17	1	0_tan	0.1727	0.99	0.99	0.98	1	0.98	0.98	1	1	1	1	1	0	0
ACGAAATACTTCAGCGAATGGTCGAGAACCTTTCGGAAGAAAAATTTGGACGTACCTTTCAACATCGTGC	conserved hypothetical protein	SAR2150	MRSA252	0	0	0	0	0.03	1	0_tan	0.2362	0.99	0.99	1	0.98	1	1	1	1	1	1	0.86	0	0
ACGAAGAGTTAATTGCCATAGATAAGCATGGTAATAAAATGTTTATTAAATTTTATCCGAATACGGAGGA	hypothetical phage protein	SAR2075	MRSA252	1	0	0	0	0.27	0.7087	0_tan	0.13	0.81	0.78	0.75	0.85	0.98	0.67	0.95	0.6	0.6	0.44	0.58	0	0
ACGAAGATGAGTTCTTTGTAAATAATTTCTTTTTAAGATATATCAATTCAGAGGTACTAGATAATGCATA	hypothetical protein	MW0355	MW2	0	0	0	0	0.32	0.0852	0_tan	0	0.23	0.36	0.12	0.55	0.23	0.02	0.78	1	0	0	0.2	0	0
ACGAATTTGCTTCTGACAACAATTTAACGTTTACTTCGTCTTATTATCACACAATGAGAAAAAGTTTTAG	hypothetical protein	SAR0290	MRSA252	0	0	0	0	0.26	0.5736	0_tan	0	0.78	0.82	0.66	0.94	1	0.45	0.93	0.75	0.7	0.8	0.73	0	0
ACGAGACCCGGTCATGAAATGGTTACATTAGAAGAAGAGCTGAACAGAGTATTACCTGTTGTTGAAGCTA	dihydropteroate synthase chain A synthetase	SA0472	N315	0	0	0	0	0.06	0.109	0_tan	0.247	0.97	1	0.97	1	0.95	1	1	1	1	1	1	0	0
ACGAGTTAGATTATTGGTTGAATAAACGCAAGTCAGAAAATGAACAGATTGATATTGATAGAGTGCTTAA	hypothetical protein	MW1416	MW2	1	0	0	0	0.29	0.0012	3_red	0	0.35	0.61	0.09	0.97	0.4	0.19	0.96	0.75	0.22	0.75	0.92	1	0
ACGATAAAATCTTTTAAGGAACTCTATAGGTTTGATGATGAGATTGTACTTCAAGCACAACAGACCATTA	hypothetical protein	SAV1992	Mu50	1	0	0	0	0.34	0.146	0_tan	0.5728	0.79	0.68	0.76	0.71	0.94	0.46	0.91	0.91	0.9	0.17	0.36	0	0
ACGCAAATTGGAAAGAAAGCGAAAGAGAGGTACGAGGCGCAAGTTAAAAGAGGTGCAGTTATTAAAGTGG	hypothetical protein	MW1917	MW2	1	0	0	0	0.3	1	0_tan	0.0255	0.95	0.96	0.91	0.99	0.94	0.9	1	1	0.94	1	1	0	0
ACGCACCAGAAGATGAGCAAACTGAAACATTTTTACGCGGCTTCTTAGGCCGTATGCTATTTAGTGGAGA	ABC transporter, ATP-binding protein	SA1427	COL	0	0	0	0	0.5	0.0668	0_tan	0	0.41	0.59	0.29	0.87	0.29	0.17	0.86	0.75	1	1	0.83	0	0
ACGGTTTGGTTCGACGGTGTTGAGAAGACTTTAAAAGCGCATCATCCAGATATCATAGTACTTAATGGTG	conserved hypothetical protein	SAR2558	MRSA252	0	0	0	0	0.31	1	0_tan	0.345	0.77	0.77	0.74	0.82	1	0.56	0.89	0.57	0.6	0.43	0.7	0	0
ACGTACACACATACATGCCTACAAACTATACAAAACATAAAAAATATTTACAAAGTCAAATGCCAAGGCT	hypothetical protein	MW1918	MW2	1	0	0	0	0.38	0.1435	0_tan	0	0.64	0.76	0.47	0.95	0.74	0.43	0.89	1	0.6	0.4	1	0	0
ACGTAGTAACGATGGATTTAGCACTGGATAAAGCTGTAAGAGATGATATATATCGTTATCTAACAAATTA	helicase, putative	SA2499	COL	0	0	0	0	0.16	0.4982	0_tan	0.0053	0.97	0.94	0.99	0.91	1	1	0.85	0.92	1	0	1	0	0
ACGTATCAAAGCTTTAGCTAGTGTTGAAAATAAACGCAACGAACAAATGATTTACATTGTAAATGACAAA	hypothetical protein	SAV0893	Mu50	1	0	0	0	0.43	0.8487	0_tan	0.0449	0.74	0.71	0.66	0.83	0.63	0.83	0.83	0.5	0.63	0.4	0.92	0	0
ACGTCCTGACGTCTGGACCGATTCCGCCAAATCCATCAGAGTTAATCACATCAAGAGCATTTGCGAATTT	putative capsule synthesis protein	SAR2744	MRSA252	0	0	0	0	0.23	0.2172	0_tan	0.0021	0.87	0.93	0.84	0.98	1	0.72	1	0.89	0.8	0.78	1	0	0
ACGTGAAAAATTATTACATGCATCGTCTCCAGAAGAAGTGTTAGCAATTATTGATCATGCTGATGATGAA	PTS transport system, fructose-specific IIABC component	SAR0753	MRSA252	0	0	0	0	0.11	0.7411	0_tan	0.1876	0.76	0.79	0.74	0.82	1	0.53	0.81	0.67	0.53	0.64	1	0	0
ACGTGACAAATGGATTAAACAATATTGAAACCGTTGTTTTAGCAAAAGATAATTATGGTCTGAAGGATTT	DNA polymerase III alpha subunit	SAR1781	MRSA252	0	0	0	0	0.32	0.6194	0_tan	1	0.69	0.64	0.67	0.66	1	0.33	0.42	0.25	0.44	0.43	0.89	0	0
ACGTGGTTTATCAACTTGAGTTAAGTGTCGTGAATAATTTGGAAAGTTATGAACACACAGAATATGTTAA	hypothetical protein	SA1831	N315	1	0	0	0	0.25	0.0006	3_red	0	0.34	0.59	0.12	0.97	0.25	0.14	0.96	0.64	0.93	0.83	0.92	1	0
ACGTTTGTAGAGAAAAAAGAAGAAAATATATACTTTAGTGATAGCTTAGATTATAAAAAAAGCGGAGATG	Staphylococcus tandem lipoprotein	SA0079	COL	0	0	0	0	0.3	0.0634	0_tan	0	0.44	0.59	0.22	0.9	0.32	0.16	0.91	0.93	0.67	1	0.67	0	0
ACGTTTTAACGAAGTATATTCTATCACAGCAATAGACAAAAACAATAAGCCATTTATATATGCACCTACT	putative subtilase family protease	SAR2789	MRSA252	0	0	0	0	0.35	0.8647	0_tan	0.0514	0.68	0.66	0.61	0.78	1	0.26	0.78	0.58	0.4	0.33	0.44	0	0
ACTAAAGGACATCGTTGATGAAAACGAAAGAATATTAACCGAATACAGTAAATCAATTAATAAGACGGAA	hypothetical protein	SAV0849	Mu50	1	0	0	0	0.39	0.0587	0_tan	0.8525	0.44	0.28	0.36	0.39	0.16	0.7	0.38	0.4	0	0	0.33	0	0
ACTAAAGTTATATATCGTGGTTGGAATAAGGAGATATTTATTTTACAGGGTAAAAATATGAATGTTATTG	hypothetical protein	SAV1973	Mu50	1	0	0	0	0.44	1	0_tan	0.0281	0.73	0.74	0.66	0.84	0.98	0.44	0.83	0.83	0.13	0.5	0.75	0	0
ACTAAGTCAAATGTATAACGAGATTGCGAATAAGATTAGCAGTATGATACCGGTAGAATGGGAAAAGGTA	hypothetical protein	MW0269	MW2	0	0	0	0	0.01	0.4703	0_tan	1	0.99	1	0.99	1	0.99	1	1	1	1	1	1	0	0
ACTAATGAAGGTAATGTTGTAGGTTATAATATTTTTGAAATTACTAATGAAGGTAATGTTGTAGGTTATA	conserved hypothetical protein	SAR1820	MRSA252	0	0	0	0	0.55	0.1148	0_tan	0.0019	0.83	0.69	0.68	0.97	1	0.16	1	0.4	0	0.33	0.75	0	0
ACTAATGACATTGAGAGAAGTTTCAGAAAAATATCATATATCTCCAGAACTTCTTAGATACAGATACAAA	hypothetical protein	MW1423	MW2	1	0	0	0	0.34	0.1951	0_tan	0.0001	0.8	0.7	0.86	0.57	0.97	0.63	0.3	0.78	0.86	0.56	0.42	0	0
ACTAATTTAAGAGTAATCATGGCTAGAGATAACGTAAGTGTTCAAGATTTGCACAATGAAACTGGCGTAT	conserved hypothetical protein	SA0349	COL	1	0	0	0	0.34	0.0847	0_tan	0	0.73	0.84	0.65	0.97	0.92	0.53	0.89	0.78	0.82	0.83	0.77	0	0
ACTACATCAATTAATGCATGAGGCGTTTACACCGTTGAGAGAACTTGGCATAGACTGGCCTTCGGTAAAT	acetyltransferase (GNAT) family protein	SAR2491	MRSA252	0	0	0	0	0.29	1	0_tan	0.2311	0.72	0.71	0.68	0.76	1	0.49	0.75	0.33	0.5	0.38	0.56	0	0
ACTACCAATGACGCAGATTTTGTTTGGACTTCTTCGTCATTAATATATATGATCCTTTTAACACTACTTA	putative membrane protein	SAR1133a	MRSA252	1	0	0	0	0.35	0.7334	0_tan	0.0007	0.67	0.7	0.58	0.84	1	0.06	0.83	0.14	0.13	0.2	1	0	0
ACTACCATGTATTGAAATGGATTTAAAAGAGATGCAAGAAGAAACTTTAAGCCAGAGTAAGATTGGTGGA	conserved hypothetical protein	SAV0834	Mu50	0	0	0	0	0.02	1	0_tan	1	1	0.99	0.99	1	1	1	1	0.93	1	1	1	0	0
ACTAGAACAGCTAAGGGATATTTTTTAATAAGTGAGACAACAGAAGACAAAAAAGGATACGTTCATAATA	hypothetical protein	SA2273	N315	0	0	0	0	0.24	0.6521	0_tan	0.0011	0.87	0.89	0.81	0.96	0.68	1	0.92	0.73	0.44	1	1	0	0
ACTATATTTTCCCATTTTAAATTCTAAAAAACAAGTAGAAATTTTAGAAACACTTATCAATTTATTGATT	hypothetical protein	SA1246	COL	0	0	0	0	0.77	0.0175	1_yellow	0.0175	0.81	1	0.81	1	0.79	0.9	1	1	1	1	1	1	0
ACTATTGGTGCAGTGATAAACCTAGTATTATGTATTATTTTGATATATTTTTATGGAATTTACGGTGCTG	polysaccharide extrusion protein	SA0117	COL	0	0	0	0	0.18	0.7027	0_tan	0.003	0.95	0.97	0.92	1	0.98	0.89	1	0.85	1	1	1	0	0
ACTATTTAGAAAATAGCGATTTGAGACCTAAAACAAAACGACGCAAACAAAATGAATATCATAAACACTT	integrase	SAV0847	Mu50	1	0	0	0	0.36	0.4758	0_tan	0.07	0.74	0.68	0.65	0.79	0.57	0.89	0.84	0.7	0.4	0.5	0.75	0	0
ACTCAAGCTTAATATCTTCATCAGTTTAGCCGAACTTGAATCGGATAACATTGGAGAACAAGTCAGAAAT	cassette chromosome recombinase A	MW0039	MW2	0	0	0	1	0.15	0.2499	0_tan	0.587	0	0.03	0.02	0.01	0.02	0.02	0	0.08	0	0	0	0	0
ACTCTTTATACGACGAAAAAAATAGATGGATGGGTTACTTTAATAGCAATGATATTAAGGTAGTAAAATA	ORFID:SA2382~truncated hypothetical protein, similar to glutamyl-endopeptid	SA2382	N315	0	0	0	0	0.3	0.496	0_tan	0.3877	0.74	0.69	0.69	0.76	0.46	1	0.81	0.44	0	0.6	0.57	0	0
ACTGAGAATAATGATATGAATGACTTGAATGATATAAAGTACAAAAATGAAATTAGTAATCATTCAAATC	ORFID:SAP001.~putative replication initiation protein Rep [Staphylococcus a	SAP001	N315	0	0	0	0	0.28	0.4403	0_tan	0.0246	0.62	0.56	0.52	0.71	1	0.15	0.74	0	0.25	0.17	0.54	0	0
ACTGATTGCGCCTTTAGCATCTCCGATTCAAGAATCTAGAGCTAATACTAATATAGAGAATATTGGTGAT	leukotoxin LukE	SA1638	N315	1	1	0	0	0.26	0.2452	0_tan	0.018	0.78	0.85	0.76	0.9	0.1	0.98	1	1	1	1	0.33	0	0
ACTGGACATTTATTAAGTAAAAAATATTTATCAGATGTACCAATTAAAGATTTAGCGAAATCAGATAAAA	ORFID:SA0850~hypothetical protein, similar to oligopeptide ABC transporter	SA0850	N315	1	0	0	0	0.03	1	0_tan	1	0.99	0.99	0.99	0.99	1	1	1	1	1	0.6	1	0	0
ACTGTGACATATTATTATTTCTCTACTAACGGTATATGGGAAACTTATGATTTCACTCCATTTCTTTTTG	hypothetical protein	SAVP010	Mu50	0	0	0	0	0.28	1	0_tan	1	0.01	0	0.01	0	0.02	0	0	0	0	0	0	0	0
ACTGTGCTTTACAGTCTTAGCAATTGTACTTATGCCGTTTCTATACTTCACTACTGCATGGTCGATTGCG	hypothetical protein	MW1927	MW2	1	0	0	0	0.26	1	0_tan	1	1	0.99	1	0.99	1	0.98	1	1	1	1	1	0	0
ACTGTTGAAGATACTAAACGACTGATAGAAAAGGGGACACTAAGCGAATTGTGTAAAGCCCATTATCACT	phage integrase family protein	SAR0629	MRSA252	0	0	0	0	0.28	0.3655	0_tan	0	0.74	0.81	0.65	0.94	1	0.36	0.94	0.5	0.5	0.5	1	0	0
ACTGTTTCAGATTATTACTATTGGAAAATAATTGATAGTTTAGAGGCACAATTTACTGGAGCAATAGACT	staphylocoagulase precursor	SA0222	N315	0	1	0	0	0.28	0.4131	0_tan	0.0007	0.72	0.65	0.79	0.53	0.63	1	0.63	0.3	0.31	0.29	0.3	0	0
ACTGTTTGAATTGGGCATTTTGTTCTCGGTTGTCGGGGTTATTGTAACGGTGATGCTGTCTCTTAGTGGA	putative membrane protein	SAR0631	MRSA252	0	0	0	0	0.27	0.3292	0_tan	0.0054	0.92	0.97	0.9	1	1	0.79	1	1	0.89	1	1	0	0
ACTTAAGGCGACTGGATACAGATTCCATGACACTACAAAAGCAGATGCGTTAACTGGCGAAGATTTAACA	hypothetical protein	SAV0898	Mu50	1	0	0	0	0.28	0.8266	0_tan	0.6541	0.85	0.87	0.85	0.88	0.81	0.94	0.94	0.9	0.8	0.43	0.93	0	0
ACTTACACGGTGCATTTTGGGCATTTATTAGTTCAATCGAATTTGATTATTTAGGCTATATTCTAGTCGC	putative nickel transport protein	SAR2778	MRSA252	0	0	0	0	0.23	1	0_tan	0.1988	0.91	0.92	0.89	0.94	1	0.77	0.97	0.9	0.92	1	0.77	0	0
ACTTAGACAGCGTAAGGTCGGCAGTATTAGCCGATAAAGAAAAATCGAAATATAATGAACCTCTCTTTTA	hypothetical protein	SAV0889	Mu50	1	0	0	0	0.21	0.3831	0_tan	0	0.85	0.9	0.78	0.98	0.8	0.93	1	0.85	0.77	0.71	0.94	0	0
ACTTGACGTTTGCGACTTATAACAATGTCGTTGTAATATCGATTGTTGCGACTATGATCATCATATTGGT	hypothetical protein	SA0338	N315	0	0	0	0	0.08	0.3693	0_tan	0.0605	0.96	0.99	0.96	1	0.91	1	1	1	1	1	1	0	0
ACTTTATCTAATGGCGCTAAAGGTTATTATAGTCCTAAATCTGATGAAATTGTAATCTCTGATGATTTGT	LtrC-like protein, authentic frameshift	VRA0056	Michigan	0	0	0	0	0.29	0.1188	0_tan	0	0.32	0.21	0.38	0.08	0.52	0.18	0	0.15	0.08	0	0	0	0
ACTTTCAATTTGTAGGTGATATAATACTAAGCAAAAATTTATCGGAAATAATTAAAATAAAAACAAAATC	putative membrane protein	SAR2562	MRSA252	0	0	0	0	0.38	0.741	0_tan	0.2372	0.57	0.53	0.52	0.62	1	0.09	0.5	0.13	0.2	0	0.22	0	0
ACTTTGACAATGTTGATTTACTAATTACAACTCACGATATCCCAAAGCAAACTTTACAAATGCTCCCTAA	transcriptional regulator (antiterminator)	SAR2719	MRSA252	0	0	0	0	0.22	0.7639	0_tan	0.0955	0.63	0.6	0.67	0.54	1	0.44	0.24	0.33	0.4	0.38	0.3	0	0
ACTTTTGAGGAAGCATTGAAAGAAAGTTTGCGAAAAGTTAAAGGCGGTTTTACATTTGCGATATTAACTA	phosphoribosylpyrophosphate amidotransferase PurF	SA0922	N315	0	0	0	0	0.03	0.2298	0_tan	0.2468	0.98	1	0.98	1	0.97	1	1	1	1	1	1	0	0
ACTTTTGTTAAAAAATGGATTTGGTCAAGTTTTGGTCAAGTAAATGTTTTATGTATTTATTTTTTTAAAG	hypothetical protein	SA1330	COL	0	0	0	0	0.18	0.4975	0_tan	0.4987	1	0.98	1	0.98	1	1	1	1	1	1	0.82	0	0
AGAAAAAATTAAAAGTTCCTTGTTCACTAATGGCTCATATACTTTTGTTGGAGACAAAATAGTAGCTATC	hypotheticalk protein	SAV0854	Mu50	1	0	0	0	0.29	0.1592	0_tan	0	0.34	0.45	0.16	0.72	0.32	0.33	0.71	0.45	0.31	0.5	0.59	0	0
AGAAAAAATTTCTCTTCGAGATAGACAAGAATGGTGGTACAATGTTTTTTATGACGATGGCAAATATAAT	hypothetical protein	SA1858	COL	1	0	0	0	0.32	0.0024	2_orange	0	0.19	0.42	0.16	0.58	0.12	0.06	0.5	0.92	1	0.14	0.31	1	0
AGAAAAGCAAGGATTGTAACAATAAATGATAAACCATATAGGTTTACCAAATCTGAAATGGAATTAATAG	hypothetical protein	SAV1979	Mu50	1	0	0	0	0.19	0.1547	0_tan	0.0006	0.86	0.93	0.82	0.97	0.82	0.9	0.96	0.94	0.83	0.88	1	0	0
AGAAAATAAAGTTACTTGATATGAATCACAGCGAAAAGCAGCAATTGTTATCACAAATAGTGACGAAAGA	hypothetical protein, similar to uroporphyrin-III C-methyltransferase	MW2539	MW2	0	0	0	0	0.19	0.012	1_yellow	0	0.49	0.68	0.21	0.96	0.37	0.26	0.9	1	0.56	1	0.89	1	0
AGAAAATACTGTAGCACAATTAGATCATGCAGTGAATAGACTACATGAAAAGATAAACCTTAATAAAGAG	traD protein	VRA0011	Michigan	0	0	0	0	0.47	0.3502	0_tan	0.0573	0.4	0.3	0.4	0.21	0.6	0.18	0.33	0.25	0.22	0	0	0	0
AGAAAATATTAGGTATTTCATTCAATTTACCTGAAGGAGAAGAATTTACATTTCATGACTTGAACAGTCG	hypothetical protein	SA0060	N315	0	0	0	1	0.27	0.0004	3_red	0	0.82	0.58	0.88	0.4	0.93	0.89	0.47	0.25	0.25	0	0.4	1	0
AGAAACACACGCACAGCTAAGGGGTACTACTTTGTCAGGACGTTTTATCGCAAGGATAAATTACCTGATA	hypothetical protein	SA0405	N315	1	0	0	0	0.21	0.8356	0_tan	0.0528	0.86	0.87	0.82	0.92	0.69	1	0.87	0.5	1	1	0.67	0	0
AGAAACTTCTTTATACGCAAAAAATTCTCCATGTTATATATGTCAATATAAAAATGTGAATCGTCTACAC	hypothetical protein	SAV0805	Mu50	0	0	0	0	0.35	0.4434	0_tan	0.4436	0.74	0.8	0.75	0.81	0.36	1	0.67	0.8	1	0.25	0.67	0	0
AGAAAGCAGTTGTCAGAATTAAAGATGGTGGTCCTAGAGATTACTATACTTTTGACTTAACTCGTCCTTT	hypothetical protein	SA1166	COL	1	0	0	0	0.17	0.7686	0_tan	0.5538	0.95	0.93	0.93	0.95	0.9	1	0.95	0.67	1	1	0.8	0	0
AGAAAGCTGCATGCACAGTGATAACGATGTATCCTCATTTAGACGGTGTATTATCACTCGATCTCACAAC	hypothetical protein	MW0035	MW2	0	0	0	1	0.38	0.0011	3_red	0	0.92	0.71	0.99	0.17	0.9	0.95	0.38	0.78	1	0	0.25	1	0
AGAAAGTTATCGATTTGAAATCAGGTATTTACACAGCGAATTTAATCAATTCAAGTGATATTAAAAGTAT	truncated map-w protein	SA1751	N315	0	0	0	0	0.2	0.5749	0_tan	0.0814	0.92	0.94	0.9	0.97	0.64	1	1	1	1	1	1	0	0
AGAAATAGAATCAATCTATCATAAGTATAATGGTATTTATGGCTATCGTCGCATTTATATCTATATTCGC	putative insertion element protein	SAR0480	MRSA252	0	0	0	0	0.26	0.873	0_tan	0.4225	0.68	0.66	0.7	0.64	1	0.5	0.45	0.36	0.5	0.33	0.4	0	0
AGAAATGTATGACATGCCAATTGATGAGTTATTTTCATCAAAAATTAAAGTAGAGGGGTCAAGGCAATGA	hypothetical protein	SAV0786	Mu50	1	0	0	0	0.37	0.0196	1_yellow	0	0.45	0.66	0.09	0.98	0.5	0.24	0.94	0.93	0.5	0.5	0.94	1	0
AGAACACTTCAAAGAATTAGTGTCAGACAAAGTCGGTTTAGTAACATGTATGTATGTAAATAATGTAACT	ORFID:SA1538~hypothetical protein, similar to iron-sulfur cofactor synthesi	SA1538	N315	0	0	0	0	0.05	0.4626	0_tan	0.489	0.99	1	0.99	1	0.98	1	1	1	1	1	1	0	0
AGAACATAAAGGTTCGTTAACGGATACGCTAAAAGAAATGCAACAAGATTTACAAAGTTCAATCTCTTAT	putative GMP reductase	SAR1347	MRSA252	0	0	0	0	0.37	1	0_tan	0.3904	0.81	0.81	0.78	0.85	1	0.6	0.78	0.71	0.7	0.67	0.5	0	0
AGAACGCAAAAAATCAGATGAACGTATTAAAGATGCGGTTCAAGAAGCTGAGAAGTTAGCTAAAATGAAG	hypothetical protein	MW1199	MW2	0	0	0	0	0.15	0.0756	0_tan	0	0.8	0.89	0.68	1	1	0.32	1	1	0.71	1	1	0	0
AGAACTAACGCAAGAAGAATTAATGAAAGCTATTAAAGCTATTAAAGCAAGAATAGCTAAGCATAAGTAA	hypothetical phage protein	SAS0928	MSSA476	1	0	0	0	0.28	0.0127	1_yellow	0.0005	0.79	0.61	0.79	0.53	0.95	0.6	0.31	0.63	0.69	0.5	0.33	1	1
AGAAGAGGAAGTTAAATTATTTTCTAAGCAAGATTACAAAAATAAAAAAGGTGATAGCGTAGATTCTAAA	PTS system, IIBC components	SA2316	COL	0	0	0	0	0.08	1	0_tan	0.3785	0.89	0.9	0.87	0.92	0.71	0.98	0.97	1	1	1	0.71	0	0
AGAAGATGTTATCCGGAGATATAGGAGCTGACGCATTACGCCATTACTTAAAAGCTGATGCTGCGTATTT	transcriptional regulator, TenA family	SA2086	COL	0	0	0	0	0.2	0.5721	0_tan	0.2507	0.95	0.92	0.95	0.91	0.9	1	0.88	1	1	0.5	0.77	0	0
AGAAGGTATTCTTAAAATGGATTATGCCCCATATACAGCTGAAAATGTCGTTCAAAACGCTAATAAATTA	putative isochorismatase	SAS0162	MSSA476	0	0	0	0	0.08	1	0_tan	0.0597	0.98	0.98	0.96	1	0.95	1	1	1	0.95	1	1	0	0
AGAATCAAACAAGCTATGAAGTCATCGAATTTAAAACAAATAGATATAGTAAACAAAGCTAAAAGCATGG	putative regulatory protein	SAR1556	MRSA252	1	0	0	0	0.34	0.6959	0_tan	0.0048	0.78	0.81	0.71	0.9	0.98	0.53	0.91	0.78	0.57	0.57	0.85	0	0
AGAATGTAATAGACGACCCGTTAATATTCAATACAACGATGGCTACGACTTAATGATAGACCAGCGTTTT	hypothetical protein	SAS064	N315	0	0	0	0	0.17	0.4317	0_tan	0.4087	0.98	0.96	0.98	0.95	1	0.96	0.95	0.93	1	0.67	1	0	0
AGAATTAAACAAATTAGAAAATCAGATATTAATGTTAGGTAAAACATTTTATCAAAACTATAGAGATGAT	staphylocoagulase precursor, putative	SA0857	COL	0	1	0	0	0.28	0.0383	0_tan	0.0064	0.14	0.28	0.14	0.32	0	0	0.14	0.86	1	0	0.25	0	0
AGACATGTTCATTATTATGACAATCCAATGTATTTTATTAGGTTAAACTTCCCTAACAACTTAAGCGTTG	prophage L54a, amidase, putative	SA0389	COL	1	0	0	0	0.24	0.0112	1_yellow	0	0.54	0.35	0.69	0.13	0.77	0.39	0.05	0.33	0.46	0	0	1	1
AGACATTAGCGATCGCCTTAACCACCCATTTCAAACGATTAGCGATACAATTAACAATAAAGAAGATTTG	hypothetical protein, similar to transcriptional regulator tetR-family	MW2474	MW2	0	0	0	0	0.24	0.0195	1_yellow	0	0.56	0.73	0.27	0.98	0.47	0.3	1	1	0.59	0.75	1	1	0
AGACATTATAAGTTATATCGGTATAGACCAATCTAGAATTGTTAAAAGCGTAAAAGAATTATCAAAAAAG	ORFID:SA2286~staphylococcal accessory regulator A homolog	SA2286	N315	0	0	0	0	0.2	1	0_tan	0.001	0.86	0.87	0.78	0.95	0.46	1	0.96	0.94	1	1	0.73	0	0
AGACTAATATCAATGAACTAATCAAATATTACACTCAGCCGCATTTTTCATTATCTGGAAAATGGTTATG	exotoxin 3, putative	SA1180	COL	1	1	0	0	0.4	0.6654	0_tan	0.6678	0.84	0.8	0.8	0.84	0.5	1	0.8	0.58	1	0.33	0.44	0	0
AGACTATCATGGTCTGTCACAAAGAGAATACAATGATAGAGTTTCTGAAATTATAAATAATGATAATTGA	hypothetical protein	SAV2001	Mu50	1	0	0	0	0.21	0.351	0_tan	0	0.79	0.85	0.7	0.95	0.97	0.53	0.96	0.83	0.71	0.33	1	0	0
AGACTTCATTGGTAATGAAGGCTCGATATTTTCTAAGCAATCAGTAATGATCACAGCACTTACTGTGCAA	putative membrane protein	SAR2700	MRSA252	0	0	0	0	0.32	0.6211	0_tan	0.8021	0.87	0.9	0.88	0.9	1	0.72	0.88	0.75	0.75	0.83	1	0	0
AGAGAAGGTACATTGAATGTATCTTTTGATTATATTGATTGGGTTAATACGGAGTTTGATCAATTAGGCC	hypothetical protein	MW0274	MW2	0	0	0	0	0.3	0.535	0_tan	0	0.8	0.85	0.59	0.99	0.5	0.89	0.96	1	0.88	0.92	1	0	0
AGAGAGAAGCAAAACTAATAATAGGTATTTCAAGTACAGTTACAGATTATATTAGCGGATACCTTGATAA	hypothetical protein	SAV0406	Mu50	0	0	0	0	0.37	0.0453	0_tan	0	0.2	0.35	0.09	0.72	0.14	0.12	0.58	0.25	0.73	0.5	0.73	0	0
AGAGATAAGCAAGAACTATTAAATAAGTATCACGAATTATTAGACAAATACTTTCTTCATAATATTTCGT	hypothetical protein	MW0753	MW2	1	0	0	0	0.26	0.0017	2_orange	0	0.25	0.48	0.04	0.91	0.19	0.13	0.82	0.82	0.25	0.57	0.9	1	0
AGAGCAGAAAAAACACTTTTAGATTATTTTTACTCATTCTCTATTTTATTTATTTTTGCTATAATAAATA	putative membrane protein	SAR0693	MRSA252	0	0	0	0	0.35	0.5819	0_tan	0	0.72	0.76	0.58	0.92	1	0.31	0.88	0.93	0.22	0.89	0.76	0	0
AGAGTAAAGAAGAAGCTGAGCGCAAATACGAGGCACAAGTTAAAAGAGGTGCAGTTATTAAATTAGGGCA	hypothetical protein	SA1782	N315	1	0	0	0	0.32	0.3606	0_tan	0.0068	0.85	0.9	0.81	0.97	0.71	0.93	1	1	0.7	1	1	0	0
AGATAAGATGTCCAAAAAGGATCTAATAACACGTCAAACTGATAATGAAAATAGAAGAACTGTGCTAATA	ORFID:SAP009.~hypothetical protein, similar to MarR family	SAP009	N315	0	0	0	0	0.25	0.0481	0_tan	0	0.7	0.83	0.53	0.99	0.55	0.88	0.96	0.64	0.62	0.8	0.94	0	0
AGATAATAATAAAGATTCAATAAAAGAGACTTTAGACGATACAAAACATTTACCACTTTTATTTGCGAAA	Cell wall associated fibronectin-binding protein	SA1472	COL	0	1	1	0	0.06	0.345	0_tan	0.1218	0.97	0.99	0.96	1	0.94	1	1	1	1	1	1	0	0
AGATACAGTAAATGAATTTTTCATGGACAAAGATATATATCCAACTGGTCCTATAATTTTCCAAAGAGAA	hypothetical protein	SAR0289	MRSA252	0	0	0	0	0.31	1	0_tan	0	0.66	0.66	0.53	0.87	1	0.14	0.88	0.57	0.27	0.33	0.55	0	0
AGATATAGACAGTCACGACAATTTGAATAGTTTCAAAGCACGCATCGGCAGTACTATCGATAAGTTAGCT	hypothetical protein	SA0075	N315	0	0	0	1	0.23	0.6091	0_tan	1	0.99	0.98	0.98	0.99	1	0.98	1	1	0.85	1	1	0	0
AGATCAAAAAGAGCTTTGCGAAAACATTAGATGTATACCCTACGAAAAATCTAGAAGATTTTTATGACAA	Staphyloccoccus tandem lipoprotein	SA0483	COL	1	0	0	0	0.57	0.8351	0_tan	0	0.61	0.65	0.39	0.93	0.6	0.19	0.95	0	1	1	1	0	0
AGATGCATTTCAAAAGTCTCCCAAAGAACTGGTTGAAACTGACCAAATGTCAATACAATACCTGAATAAT	truncated conserved hypothetical protein	MW2310	MW2	0	0	0	0	0.02	1	0_tan	0.4894	1	0.99	1	0.99	1	1	0.97	1	1	1	1	0	0
AGATGCTTTAAATGGCGCAGTTAGAGGACGTCAAGTGATTATTAATAAATTTGCTGTTGAGCTCAACAAA	conserved hypothetical protein	SAR2392	MRSA252	0	0	0	0	0.25	0.5914	0_tan	0.0007	0.9	0.93	0.85	0.99	1	0.69	1	0.9	0.88	0.88	1	0	0
AGATGGGCAAATATTCACGGAGTTATATCAAGGTGATGATGACAAACATACTTTCTTTAAAGAAATCATA	putative ABC transporter protein	SAR0671	MRSA252	0	0	0	0	0.24	0.6004	0_tan	0	0.75	0.79	0.65	0.92	1	0.35	0.94	0.56	0.54	0.57	1	0	0
AGATTACCTAACTCGTCACTATTTGGTGAAAAATAAAAAACTCTATGAATTTAACAACTCGCCTTATGAA	staphylococcal enterotoxin B	SA0907	COL	1	1	0	0	0.29	0.186	0_tan	0.0105	0.1	0.18	0.09	0.24	0.02	0.08	0.4	0.36	0.62	0	0.08	0	0
AGATTTATTTAAAGATGAAGGATTGACTGAAGAAGATGTTCTGAACAAGATGAGTACTAAAACTTATACA	hypothetical protein	SA0377	COL	1	0	0	0	0.31	0.3724	0_tan	0.0028	0.89	0.83	0.93	0.76	0.99	0.83	0.75	0.78	0.86	0.63	0.64	0	0
AGATTTTAAAGTAAATGGAAAACGGTTCAAACAAATAGATAATTATAATGATAATAGTAATGATAATATG	hypothetical protein	SAS1429	MSSA476	0	0	0	0	0.29	0.7363	0_tan	0.0628	0.69	0.72	0.64	0.78	0.15	0.95	0.95	1	0.11	1	0.17	0	0
AGCAACGACGGAGATAAGAAAGAAGAAAGCAAGAGCTATACTACAAATGATATCGTTAAAGGTTTTAAAG	pathogenicity island, lipoprotein, putative	SA0888	COL	1	0	0	0	0.38	0.4358	0_tan	0	0.2	0.25	0.1	0.47	0.13	0.04	0.46	0.3	0.64	0.33	0.42	0	0
AGCACACCATATCTAATACTAAACAAAGGATTTTTAATAGTTATTTCGACTATCTTACTGCTTACTTTTT	accessory gene regulator protein C	SA2025	COL	0	0	0	0	0.21	0.0034	2_orange	0	0.41	0.63	0.21	0.91	0.25	0.17	0.97	0.54	1	0.4	1	1	0
AGCACCGCAACAAACAGCAAATGCGACAACACCGCCTTCAACTAAAGTGACAACACCTCCATCAACAAAC	exotoxin, putative	SA0472	COL	1	1	0	0	0.09	0.3318	0_tan	0.0502	0.97	0.99	0.96	1	0.92	1	1	1	1	1	1	0	0
AGCAGGTTATACACTTGATAAGAATAATGTGCCTTATAAAAAAGAGGATGGTAATTACACAGTTGCCAAT	amidase	SAS0954	MSSA476	0	0	0	0	0.38	1	0_tan	0.0043	0.42	0.42	0.31	0.55	0.6	0.22	0.36	0.27	0.57	0.56	0.46	0	0
AGCATCAGTAAAAGCTGAAGATATATCAAAAAAGGAGGATACACCAAAAGAAGTAGCTAATGTTGCTGAA	ORFID:SA2285~hypothetical protein, similar to accumulation-associated prote	SA2285	N315	0	0	0	0	0.33	1	0_tan	0.1797	0.85	0.85	0.81	0.9	0.29	1	0.94	0.92	1	1	0.44	0	0
AGCATGAAGTAAAAAATTGGAAAACCGTCAATCAAATAATTGAAAAAGAACACTTGGACAAAAATGAATA	hypothetical protein	SA1852	COL	1	0	0	0	0.33	0.2208	0_tan	0	0.65	0.74	0.33	0.99	0.54	0.26	1	0.92	1	1	0.87	0	0
AGCATGATATTAACGGGAATGTCCCTATATTCATTAATATTGGTGAATGGGACGGAGACGATGAGGAATT	hypothetical protein	SAV0800	Mu50	1	0	0	0	0.18	0.262	0_tan	0.0009	0.91	0.95	0.87	0.99	1	0.74	0.96	1	1	0.67	1	0	0
AGCATTGAGAAGAACGTTAAATTACCTTCAGATGCAGACGTTTCAGTTAAAAAAGGCGACTTTGTAATTG	putative exported protein	SAR2470	MRSA252	0	0	0	0	0.17	0.1403	0_tan	0	0.83	0.91	0.76	0.98	1	0.61	1	0.83	0.54	0.9	1	0	0
AGCATTGGGGCTTATTTTGCCCCTAGGAGCGCAAAACGTGTTTGTATTTAATCAAGGTGCTAATCAAAAA	putative LysE type translocator	SAR2591	MRSA252	0	0	0	0	0.31	1	0_tan	0.593	0.74	0.73	0.72	0.76	1	0.52	0.69	0.43	0.58	0.6	0.33	0	0
AGCCACTACCGAATGACAAGTTAAGAAAAGAAATCGAAAACTTTAAATTCTTTGTACAATACGGTGACTT	hypothetical protein	SA2269	N315	0	0	0	0	0.17	0.6836	0_tan	0.0056	0.98	0.96	1	0.93	1	1	0.9	1	1	0.25	0.86	0	0
AGCCATCGAAATTAAAGGAAGTATACAATAGTAAAGATCCAAAGTATAAGAAGATTGACCGGTATTTACA	autolysis and methicillin resistant-related protein	SAR1030	MRSA252	0	0	0	0	0.3	1	0_tan	0.0015	0.73	0.73	0.64	0.86	1	0.21	1	0.4	0.33	0.33	1	0	0
AGCCGCGTATATAAATTGTGATTTTTTATTGGACGAAGCTGAAGTACCAAAAGAATTAACTCAATTACAC	AgrD	MW1961	MW2	0	0	0	0	0.4	0.5755	0_tan	0.0004	0.76	0.71	0.62	0.9	1	0.18	0.77	1	0.14	0.2	0.75	0	0
AGCGCATTGTATATCTAAATGGGGACATGATTTTAGACCGAGTTATCAAAACGTTATTTCTAAAGTATTT	putative ATP-dependent DNA helicase	SAR0774	MRSA252	0	0	0	0	0.23	0.3108	0_tan	0.0194	0.88	0.93	0.86	0.96	1	0.7	1	0.82	0.88	0.88	1	0	0
AGCGCGTTTATACAGAAATGTATTTTCTGTGATGTTACGCAATGATTTAAAGCGTTATATAGATTTTTAG	hypothetical protein	MW2614	MW2	0	0	0	0	0.36	0.0089	1_yellow	0	0.31	0.52	0.18	0.81	0.27	0.14	0.8	0.94	0.36	0.57	0.78	1	0
AGCGTGGATGCAGTCATCAATGATTAAAGATGAAAAAGCATTACAAAATTCTAAAACACATAATAATTTC	hypothetical protein	SAV1985	Mu50	1	0	0	0	0.23	0.6144	0_tan	0.0389	0.89	0.92	0.87	0.96	0.97	0.79	0.95	1	0.87	0.33	1	0	0
AGCTAATACTGAACAATATGGTGCTGTATATCTTGTAAATCTATTTTCAAATATTAGAACACCCGAAAAC	conserved hypothetical protein	SA0037	COL	0	0	0	1	0.48	0.1364	0_tan	0	0.51	0.66	0.38	0.82	0.33	0.43	0.93	1	0.69	0.88	0.58	0	0
AGCTAATCCTGAATATACAATTCATTATTTATCACAGGAAATTATGAGGTTAACACAAGAAAACGCGATG	hypothetical phage protein	SAR2047	MRSA252	1	0	0	0	0.2	1	0_tan	0.104	0.92	0.92	0.89	0.96	0.99	0.9	0.89	0.82	0.7	0.8	1	0	0
AGCTACCCATCAAAAGAAAGATACTGAAGTAAATCATCAAAAAGACGAGAATACAAACAACACAAATGAA	putative exported protein	SAR2718	MRSA252	0	0	0	0	0.23	0.8353	0_tan	0.0206	0.86	0.84	0.79	0.92	1	0.58	0.9	0.92	0.67	0.67	1	0	0
AGCTATCTACTATCAAAGAAGAGCATTATGAAAAAATTGTTGATTTTATGAATGCGAGAATAAATGCATG	hypothetical protein	MW1428	MW2	1	0	0	0	0.27	0.1815	0_tan	0.4348	0.85	0.76	0.78	0.84	0.98	0.61	0.79	0.89	0.8	0.78	0.62	0	0
AGCTGATGAAGTATGGTATTCACCAGTTGTATGTATGGCTTTAAGTAAAGCGCATAATATTAATTTTTAT	hypothetical protein	SAV0793	Mu50	1	0	0	0	0.31	0.1264	0_tan	0	0.24	0.37	0.09	0.69	0.08	0.02	0.8	0.43	0.87	0.33	0.65	0	0
AGCTGCAAGAGCAAGAGGGAGAAAAGGTGGAAGACCTTCACTACCAGATCATAAGAAAAGAGAGATCAAA	truncated resolvase Res	SAVP013	Mu50	0	0	0	0	0.31	0.0027	2_orange	0	0.33	0.57	0.01	0.97	0.31	0.19	0.87	0.64	0.5	0.83	0.93	1	0
AGCTTCTATTCAACAAAAGGTTATTCCAGAACATTTGCTTGCTAGATTAACTACAATCATAACAAGTATT	hypothetical protein, similar to export protein	MW2292	MW2	0	0	0	0	0.11	0.6231	0_tan	0.6247	0.01	0.03	0.03	0.01	0	0	0.04	0.33	0	0	0	0	0
AGCTTTTATTATGTCTACCGTTTTGAATGTTTTATTTTTAGTTGGGTTAACTTTCTTAGTTCAATTAGAA	putative membrane protein	SAR0688	MRSA252	0	0	0	0	0.4	1	0_tan	0.0175	0.74	0.75	0.67	0.86	1	0.37	0.85	0.33	0.5	0.43	0.63	0	0
AGGAAACAAATAGAGGTTGTTTAAAAAGCGCCGCCATGCTTATTGTCTTATTTCTATTCATTATATTTGG	putative membrane protein	SAR1133	MRSA252	1	0	0	0	0.31	0.7933	0_tan	0.0029	0.89	0.91	0.84	0.97	1	0.63	1	0.88	0.88	0.75	1	0	0
AGGAAAGGCCTTTTCGCATAAGTTTTTTGTATCTAAAACTTGGATTAATAATGCTCCTACAAAAGAAGAT	hypothetical protein	SAV2596	Mu50	0	0	0	0	0.31	0.2141	0_tan	0.2034	0.59	0.49	0.58	0.47	0.08	0.98	0.7	0.09	0	0	0.27	0	0
AGGAACAACAGCTACACAAACCTCTAATTCGCCATTAAATGTTTCTACAGACGCTAAAGCTTATCATATT	exotoxin	SAR1139	MRSA252	1	1	0	0	0.32	0.6263	0_tan	0.0543	0.86	0.9	0.84	0.94	1	0.66	0.94	0.86	0.67	0.57	1	0	0
AGGAACACTTACAAGCCATAATCGAGTGGGCATTACAACAAATAGAAAATAACTTTGATTTTGAGAATGA	hypothetical protein	MW0749	MW2	1	0	0	0	0.26	0.0096	1_yellow	0	0.45	0.64	0.12	0.97	0.39	0.29	0.93	0.82	0.57	0.71	0.87	1	0
AGGAACGAATATTGGATAAATATGGGGATGATGTTAAGGCTATTGGTGTTTATGGCTCTCTTGGTCGTCA	kanamycin nucleotidyltransferase	SA0033	N315	0	0	0	1	0.46	0.4335	0_tan	0	0.96	0.92	0.99	0.57	0.98	0.98	0.8	1	0.88	0.25	1	0	0
AGGAAGGATTTCGTGACGAAGAGTTTGATAAAGGAGATAAAGGCACTTGGATTGTTGATTCTGAGATGGT	putative lipoprotein	SAR2573	MRSA252	0	0	0	0	0.25	0.2488	0_tan	0.1464	0.9	0.96	0.9	0.96	1	0.82	0.9	1	0.7	0.83	1	0	0
AGGACTTAAGCAATTAGTTGATTTAGAGAGAGAATGGGTTCCGGAAGGTGAAGGTCAATCATTATATATT	putative aminotransferase	SAR0559	MRSA252	0	0	0	0	0.21	0.3233	0_tan	0.0081	0.81	0.87	0.78	0.93	1	0.58	1	0.73	0.7	0.67	1	0	0
AGGAGACTGGGTTAAAAGTGCAATGTCTGAGATAGACAGTATTAAAGATGATTTGAAAAAAATTAATAGC	hypothetical protein	SA0408	N315	0	0	0	0	0.17	0.2116	0_tan	0.2417	0.95	0.99	0.96	0.99	0.95	1	1	1	0.92	0.8	1	0	0
AGGCAAGATTACAAAACTATAAAAATCGATCTATAAGTAATATGGTGTTGTTGAAAACAGTACTAAATCA	hypothetical protein	SAR0380	MRSA252	1	0	0	0	0.31	0.5176	0_tan	0.2594	0.67	0.61	0.6	0.68	1	0.21	0.61	0.2	0.53	0.17	0.42	0	0
AGGCAGAATACCCGTCCAATTAGCTAGGAAAAAATTCCCTTATCACGACTTATCAGACGAGAGAATAATG	hypothetical protein	SAV0859	Mu50	1	0	0	0	0.3	0.2115	0_tan	0.1395	0.93	0.86	0.86	0.93	0.92	0.87	0.87	0.91	0.75	0.8	1	0	0
AGGCAGAGTCTAATGACATTCATTATAAGTAAATTGAAGTCGACGTTGAAGCAACGCATAATAAATGCTC	hypothetical protein	MW2493	MW2	0	0	0	0	0.36	1	0_tan	0.0031	0.94	0.94	0.89	1	1	0.64	1	1	0.9	1	1	0	0
AGGCCTAGGAGTTATAAGTTCAAGAGAATTTTCAAAAGCAGAAACACAACGTATGCAATTTATTTATGAT	traG protein	VRA0014	Michigan	0	0	0	0	0.46	0.0302	0_tan	0.0076	0.5	0.3	0.48	0.21	0.66	0.32	0	0.3	0.18	0	0	0	0
AGGCGATGTGAAAGTTAAAGAGCGGGAGATAGAGATATTAAGAAGTAGATTGAGACATTTTGAAGGTTAA	hypothetical protein	SAV0883	Mu50	1	0	0	0	0.29	0.4017	0_tan	0.0099	0.81	0.87	0.78	0.93	0.78	0.91	0.89	0.86	0.77	0.8	0.87	0	0
AGGCGCGTGAAGCTGGATTCGACCCAGCAGCAGTTGTAGTTGTAGCAACGATTCGTGCATTAAAAATGCA	formate--tetrahydrofolate ligase	SAR1810	MRSA252	0	0	0	0	0.18	0.7155	0_tan	0.1224	0.96	0.97	0.94	0.99	1	0.89	1	1	0.8	1	1	0	0
AGGCTAACACGGCTGAAAGCAATGCCAAACTATACACAGATGACAAGTTTAATAAAAGATATTCAGTTAT	hypothetical phage protein	SAS0949	MSSA476	1	0	0	0	0.38	1	0_tan	0.0244	0.15	0.14	0.1	0.25	0.15	0.17	0.21	0.1	0	0.17	0	0	0
AGGGCGTCTTTGATTATCGTCGTTCGTTACTGCGCACCGATGTTGTGTTAAATAGTGAGGATAATAAATC	putative exported protein	SAR0020	MRSA252	0	0	0	0	0.37	0.0276	0_tan	0	0.82	0.65	0.98	0.38	0.98	0.86	0.36	0.25	0.14	1	0.38	0	0
AGGGTTGGGCTAAAAAGATTGATGTCTATGCTGGAGTAAATGGGCAAACATATACAATAGGAAAGGCCTT	ORFID:SA2389~truncated hypothetical protein, similar to metalloproteinase m	SA2389	N315	0	0	0	0	0.36	0.8331	0_tan	0.0147	0.83	0.81	0.77	0.93	0.59	1	0.91	0.8	0.25	0.75	0.89	0	0
AGGTGCGATTGACAAAGCTGTATTAACTTTACTTGGCGATGGTTCTAAATCTTATATCCAACCATTGAAA	IgG-binding protein SBI	MW2341	MW2	0	0	0	0	0.49	0.1745	0_tan	0	0.25	0.37	0.19	0.63	0.17	0.15	0.64	1	0.38	0.17	0.29	0	0
AGGTTACCAATTAGATGGTCCACTCGTTGACATGGTTGAAATGGGACGTGACATATTAGACGGTGTCATA	terminase large subunit	SAR1519	MRSA252	1	0	0	0	0.3	0.0448	0_tan	0	0.63	0.47	0.69	0.33	0.9	0.46	0.2	0.2	0.23	0.17	0.13	0	0
AGGTTTATAGATTTCGAAAAAGAAAGTGCACGGAAATATAAAAAAATATATGCTCGATTTTTAGTTATTA	hypothetical protein	SA0283	N315	0	0	0	0	0.2	0.4324	0_tan	0.0007	0.81	0.86	0.75	0.93	0.28	0.98	1	0.92	0.95	1	1	0	0
AGTAAAACTTCATTATATAATCAGTCTCAAGTTTATAAAATTATGAAAGATATAAAACAATCTATAACTA	hypothetical protein	SAS1251	MSSA476	0	0	0	0	0.29	0.0003	3_red	0	0.24	0.52	0.07	0.89	0.12	0.06	0.86	1	0.13	1	1	1	0
AGTAAAATTATATAATGTTGTATATTCTTATAACGGCATTAAACGTAATTTTAAACAAGTTGAAAATGAA	conserved hypothetical protein	SA2489	COL	0	0	0	0	0.12	0.0953	0_tan	0.0114	0.95	0.99	0.94	1	0.86	1	1	1	1	1	1	0	0
AGTAGAATGGGAGCAAGTATTTACAATAGCTTATGTAACTGATCAAGCTGGGGAAGTCATTTTTAATTAT	conserved hypothetical protein	SA0292	COL	0	0	0	0	0.08	0.3612	0_tan	0	0.88	0.92	0.81	0.99	0.73	0.97	0.97	0.93	0.89	1	1	0	0
AGTAGATAATCGAATTATTCCTAAAAATATAACTCAAAACAAAATCTTCAAATTGAGTAATTTAACCTTA	hypothetical protein	SA0377	N315	1	0	0	0	0.14	0.3618	0_tan	1	0.99	0.97	0.98	0.98	1	1	0.86	0.5	1	1	1	0	0
AGTAGCTTATTTATTAAAAGGTGGTAAAGTTACAAAAGTAGATGGCAATCAAAATAGTGTATCTTTTGTG	hypothetical protein	SAR1321	MRSA252	0	0	0	0	0.26	0.3445	0_tan	0	0.78	0.83	0.6	1	1	0.28	1	0.91	0.56	1	0.93	0	0
AGTAGTAGCTAGTAATGAAATATCAGAACTATTATATGAATATGACAGTGAGTTAATGTCAGCTGATGAA	hypothetical protein	MW1412	MW2	1	0	0	0	0.29	0.0355	0_tan	0	0.25	0.41	0.12	0.68	0.22	0.22	0.57	0.53	0.23	0.63	0.67	0	0
AGTATGATGATGAGTATTTAATGGTCGATGTAATAAGCACTTGGCTTGTATACTTTTTTCCATTTATTAA	conserved hypothetical protein	MW0554	MW2	0	0	0	0	0.28	0.0191	1_yellow	0	0.51	0.69	0.29	0.95	0.32	0.14	0.93	1	1	1	0.77	1	0
AGTATGTTGCAATTACCACAAGTTGATTCATTTGTAAATCTTATGACGAGCTTTGTTGAAGAACCAAAGG	LysR family regulatory protein	SAR0683	MRSA252	0	0	0	0	0.17	1	0_tan	0.4975	0	0.01	0	0.01	0.03	0	0	0	0	0	0	0	0
AGTATTATACATTCGCTCTAGATGGCTTGGGCCAAAGAATTTTAAAAGCGTTAGAAGAGAAATTGAAACA	cardiolipin synthetase homolog	MW1205	MW2	0	0	0	0	0.21	0.0032	2_orange	0	0.31	0.53	0.17	0.77	0.15	0.04	0.96	0.92	0.23	1	1	1	0
AGTATTCAATTTTTAGAACCGAAGAACACAGATGATAATCAACAAGATTTATACCAACAACAAGCGCAAC	single-strand DNA-binding protein	MW1921	MW2	1	0	0	0	0.56	0.0719	0_tan	0	0.5	0.68	0.42	0.9	0.73	0.31	0.79	0.89	0.5	0.25	0.89	0	0
AGTATTGCAAATCATTATGACAACGCTAAATTATATACCCACTTAAAAGGCGAACAAGGTTATATCGGTG	flavohemoprotein	SAR0233	MRSA252	0	0	0	0	0.26	0.7994	0_tan	0.0038	0.89	0.91	0.84	0.98	1	0.78	0.95	0.91	0.73	0.86	0.92	0	0
AGTCCAGAAATGATTATGCAACGTGCTTTAAAAATTGCTAACAACACAATCAATCAATTAGAAACAAAGA	phage anti repressor	MW1932	MW2	1	0	0	0	0.07	1	0_tan	0.1012	0.99	0.98	1	0.97	1	0.98	1	1	1	0.67	1	0	0
AGTCGTGGATACTCAAATGACCAATCTAGAAGCAAGGTGTTTAATGAAAAAGGATTGCAAAAAATGATTT	uncharacterized phage protein	SA0371	COL	1	0	0	0	0.29	0.7749	0_tan	0.7733	0.93	0.91	0.93	0.91	1	0.86	0.81	1	0.86	1	0.85	0	0
AGTGAAACATAAATATTTGAAAGTCAACCGCTCTAATATGATTACATATAAGTCCAATCAATATTCAGCA	ORFID:SAS076~hypothetical protein, similar to transposase for IS232	SAS076	N315	0	0	0	0	0.29	0.4926	0_tan	0	0.71	0.76	0.56	0.95	0.3	0.98	0.96	0.5	0.4	0.57	1	0	0
AGTGAAATCAAAAACAAATACAAGAGGTATTCAAAGAGAAAATAAAAATTATGAAAATATAGATATTGAT	truncated Pre protein	SAP023	N315	0	0	0	0	0.18	0.6663	0_tan	0	0.87	0.89	0.75	0.99	1	0.55	0.97	1	0.73	1	0.89	0	0
AGTGCACTTTTTTGCGTATTGTTATTAATGTCTTTTAACTTATTGAGTGCGAGACTATTTGGAGAGTTAG	putative D-serine/D-alanine/glycine transporter	SAR1775	MRSA252	0	0	0	0	0.19	0.7124	0_tan	0.0636	0.8	0.83	0.76	0.87	1	0.58	0.84	0.7	0.58	0.67	1	0	0
AGTGCTCCCATAGATAAATTTAAACGTAGTATGAAACGTTCTGATTTTTACTCAATGAGTATATTATTGG	hypothetical protein	SAR1132	MRSA252	1	0	0	0	0.28	0.4788	0_tan	0	0.73	0.78	0.62	0.91	1	0.25	0.94	0.6	0.4	0.5	1	0	0
AGTGCTGTGACTGATTCAGACGGTATTATTAAATTCGACCGCGACAATAAACCAGGTATTACAAATTTAA	putative tryptophanyl-tRNA synthetase	SAR0964	MRSA252	0	0	0	0	0.15	0.857	0_tan	0.0711	0.81	0.83	0.77	0.87	1	0.62	0.95	0.67	0.47	0.64	1	0	0
AGTGGACTGGTTTATTTATCTTGATTGGATTATTTGTGGCCGACTGGACAGTTGGATTAGCAGCTATGAT	putative membrane protein	SAR2371	MRSA252	0	0	0	0	0.19	0.1136	0_tan	0.2477	0.97	1	0.97	1	1	0.93	1	1	1	1	1	0	0
AGTGGAGATTGTTTCGGGTGTAAGAAATGGTTATACATTAGGTAGCCCTATTACAATGGTTGTTACTAAT	chorismate synthase	SAR1477	MRSA252	0	0	0	0	0.26	0.7898	0_tan	0.0318	0.91	0.92	0.87	0.96	1	0.73	1	0.88	0.86	0.75	1	0	0
AGTGTAACTGAAATAAAAGCTATTAGAGTTGTTAATGATAGAAGATTATCGCAATTGGCCAGAATGAAAT	hypothetical protein	SAV0884	Mu50	1	0	0	0	0.39	0.0791	0_tan	0	0.26	0.41	0.09	0.87	0.22	0.17	0.75	0.33	0.38	0.6	0.85	0	0
AGTTAATGTGAACCGATTACGTAAGAAACTATCTGAAATAGGGATGGACAGCGCAATTGAAACAAAAGTA	putative response regulator protein	SAR0669	MRSA252	0	0	0	0	0.28	1	0_tan	0.0853	0.9	0.89	0.86	0.94	1	0.66	1	0.83	0.83	0.67	1	0	0
AGTTACAATCTTTGATTAACAAATATCCACAAATACAAAAAAATATGAAATCAGAGTTCATTGCTTATTA	hypothetical protein	SA2679	COL	0	0	0	0	0.26	0.8321	0_tan	0.033	0.87	0.85	0.8	0.92	0.35	0.98	0.97	1	0.95	1	0	0	0
AGTTACCACAAGCTCAAATTCAAACACAATCTGTTCATAGTAAAGACATAACTGGTAATGAAGCACATGT	truncated hypothetical protein	MW0044	MW2	0	0	0	1	0.3	0.0124	1_yellow	0	0.32	0.52	0.1	0.86	0.31	0.13	0.86	0.73	0.4	0.63	0.75	1	0
AGTTACCTTAAAGGATGACAGTTTATACTTAACTGATGAAACATATCATTCAGTGAAAGCAAACACAAAT	ORFID:SA0202~hypothetical protein, similar to gamma-glutamyltranspeptidase	SA0202	N315	0	0	0	0	0.15	0.5158	0_tan	0.8707	0.78	0.73	0.76	0.74	0.52	0.98	0.76	0.6	0.55	1	0.6	0	0
AGTTACTTTAGTAATTAAACTGATTCCAATCATCGTTATTGTAATTTTTGGTATTTTTCAATCTGGAGAT	amino acid permease	SA1476	COL	0	0	0	0	0.06	0.62	0_tan	0.1283	0.91	0.93	0.89	0.95	0.77	1	1	1	1	1	0.82	0	0
AGTTGATGAGAGGCTCAACAAAATGCTGAAAGGAGAAGACAATGGGAGAAGTATCGTGGATAAAACTTAA	conserved hypothetical protein	SA0340	COL	1	0	0	0	0.41	0.0311	0_tan	0.1934	0.89	0.74	0.77	0.87	0.93	0.65	0.83	0.73	0.5	0.67	0.92	0	0
AGTTGATTGGAAAAATAAAACAGTTAAAGTCGTTGATAAATACTCTGATAATAAATCATTTAGAGAAGGA	hypothetical protein, similar to leukocidin chain lukM precursor	MW1942	MW2	0	1	0	0	0.13	0.4686	0_tan	1	0.99	1	0.99	1	0.98	1	1	1	1	1	1	0	0
AGTTTAATTACTGATGAAGAAAAGAAATATTTTGAACAACAAGCAAATGTAGAGTTGAGTCCTACATCAG	ORFID:SA0827~hypothetical protein, similar to ATP-dependent nuclease subuni	SA0827	N315	0	0	0	0	0.29	0.0612	0_tan	0	0.66	0.51	0.73	0.36	0.44	0.98	0.36	0.18	0.25	0.14	0.25	0	0
AGTTTTAAATATTTTTACAATAGCTTTTAAATCAATATTGAAAAATAAAGGTAGAAATATATTTACAATG	truncated hypothetical protein	MW0173	MW2	0	0	0	0	0.62	1	0_tan	0.0011	0.24	0.26	0.14	0.45	0.1	0.67	0.6	1	0	0	0.2	0	0
ATAAAAAAGCTTATAATTTAAAGCGAACTTTTGAACAACCGATAGTTATGTATGAATTTACAGATAAGTT	hypothetical protein	SA1580	COL	0	0	0	0	0.26	1	0_tan	0	0.72	0.73	0.59	0.88	0.98	0.25	0.81	0.78	0.93	0.6	0.65	0	0
ATAAAAATAATGACTTGTCGAAAAAAATATCTATATTAAAACAAACAAACCATACTGAAATGAATATTAC	iron compound ABC transporter, ATP-binding protein, putative	SA0798	COL	0	0	0	0	0.24	0.4165	0_tan	0.0126	0.82	0.87	0.78	0.92	0.29	0.98	0.97	1	1	1	0.2	0	0
ATAAAACTTACTATATCTATTGTAAAAGTGGTAATAGAAGTAGAAAAGCCAGTCAATTTCTTGCACAACG	conserved hypothetical protein	SA0047	COL	0	0	0	1	0.41	0.2275	0_tan	0.0594	0	0.03	0	0.06	0.02	0	0.13	0	0	0	0	0	0
ATAAACAAAATTATGACAAATCTAAATTAAAATATACTGCTAAATTATTCCCATTCGGACCATTATTTGC	amino acid permease	SA1728	COL	0	0	0	0	0.03	1	0_tan	0.0656	0.96	0.97	0.94	0.99	0.88	1	1	1	1	1	1	0	0
ATAAACATGATGATGTAACTGTTAAGCAAGACAAAGATGAATCTAAAGATCATCATAGTGGTAAAAAAGG	elastin binding protein	MW1369	MW2	0	1	0	0	0.13	0.4941	0_tan	0.0228	0.97	0.95	0.99	0.92	1	1	0.89	0.92	0.75	0.5	1	0	0
ATAAAGAGAAACACTTAAATATGCTAGAATCTAGAGAGCAATTATCAGTCGAAGAATACGAAACATTCTT	probable HMG-CoA synthase	SA0035	N315	0	0	0	1	0.38	1	0_tan	0.5779	0.68	0.68	0.7	0.64	0.93	0.36	0.33	0.82	0.62	0.44	0.7	0	0
ATAAAGAGATTGCTTCGCTCAATATTCAATCCATCATCACACATGGCTATTTCGGTTCCATGCACGGTAG	putative DNA-binding protein	SAR2777	MRSA252	0	0	0	0	0.28	0.8376	0_tan	0.0205	0.83	0.85	0.78	0.92	1	0.61	1	0.8	0.7	0.75	0.73	0	0
ATAAAGTTAAAAAATCTAAAATTGCTAAAGAATCAGTAGCTAATCAAGAGAAAAAACGAGCAGAATTACC	cell wall surface anchor family protein	SA2505	COL	0	0	1	0	0.24	0.4044	0_tan	0.5291	0.88	0.84	0.84	0.88	0.54	1	0.81	0.93	1	1	0.64	0	0
ATAAATATCCGCAAGCTTTTATTCATATGGTTGGTTTTTCAAGAGGTGGACTACAAGGGTTGTTGACGTT	conserved hypothetical protein	SAR1873	MRSA252	0	0	0	0	0.18	0.7363	0_tan	0.0014	0.95	0.96	0.91	1	1	0.85	1	0.92	0.83	1	1	0	0
ATAAATCTAAGAAATTACTTAACATTTTAGAAAAAATTTGTGATGAGAAGAAATTGAAAATCATATTATC	CadX	SAP006	N315	0	0	0	0	0.28	0.0193	1_yellow	0	0.68	0.84	0.6	0.96	0.26	0.85	0.85	0.94	0.89	0.9	1	1	0
ATAAATGTAGACAATCAGGAAAAACAGAATAATGTAAATCAAGCTGTTCAGCCTCAAAATAATACTAATG	surface protein, putative	SA0479	COL	1	0	0	0	0.31	0.0678	0_tan	0	0.17	0.3	0.12	0.46	0.13	0.04	0.54	0.11	1	0	0.25	0	0
ATAACAAGCACGATTCAAGACAATTTGGTTTAATCGATAAAAAGGATATTATTGGTAATGTTAGTTTACG	signal peptidase IA, inactive	SA0968	COL	0	0	0	0	0.45	0.0319	0_tan	0	0.62	0.8	0.45	0.97	0.57	0.41	0.94	0.82	1	1	1	0	0
ATAAGAAAACTCTTAATCGAAAAATATAGATTGTATAAAGGAACGTCTGATAAAGGTAGAATTGTTATCA	exotoxin 5, putative	SA0473	COL	1	1	0	0	0.42	0.6237	0_tan	0	0.83	0.87	0.57	1	0.81	0.5	0.96	0.86	1	1	0.94	0	0
ATAAGAAATGCGAGCGATAGTATACAAAAAGTTGGCGAAGAATTTAATCAAACAGACGTAATGATTGGTA	hypothetical protein	SA2373	N315	0	0	0	0	0.21	0.154	0_tan	0.0007	0.9	0.96	0.87	1	0.85	1	1	0.91	0.7	1	1	0	0
ATAAGACATTAGTTATTGATGGCGATATGTGTAAGCCAACACAAAACTATATTTTTAATGAGCAAAATAA	capsular polysaccharide synthesis enzyme Cap5B	SA0145	N315	0	0	1	0	0.04	1	0_tan	0.1201	0.99	0.98	0.97	1	0.97	1	1	1	0.95	1	1	0	0
ATAAGACGCAAAATAGTGGTTATGAAAATGAATATTTTTATATTTCGGCCATACCTTATAATTTAGCTGA	hypothetical protein	SA1528	COL	0	0	0	0	0.49	0.1443	0_tan	0	0.48	0.63	0.36	0.89	0.59	0.15	0.73	0.69	1	0	0.67	0	0
ATAAGTACGACAAAGTTTATATCGTACCTTTAGATAAGCTGACAAAACAAGAATTATTAGAACTATGCGA	hypothetical protein	SA1773	N315	1	0	0	0	0.11	0.172	0_tan	0.106	0.93	0.87	0.87	0.94	0.99	0.92	0.85	0.6	0.73	0.63	1	0	0
ATAAGTGATGTGTTGATAGATGATGAAATAAATACCGATGAATTCTTTTCAATAGGTGATGAAAATTCTA	hypothetical protein	SA1821	N315	1	0	0	0	0.22	0.0714	0_tan	0	0.87	0.95	0.83	0.99	1	0.65	0.93	0.92	1	0.86	1	0	0
ATAATCTTACTGCTGTTTTTAATATTTGGATTCATTGTTGTGGTTACTTTAAAAAGTGAGCATCAATTAA	hypothetical protein	SA1780	COL	0	0	0	0	0.19	0.2594	0_tan	0.0025	0.95	0.98	0.92	1	0.88	1	1	0.94	1	1	1	0	0
ATAATGTTAGATATATTTTTCATTAAAGATGTAATGGCTATTGTTGTCGGAGTTTTAATGTTTATTTTTA	truncated hypothetical protein	SA1634	N315	1	0	0	0	0.25	0.6764	0_tan	0.0208	0.83	0.86	0.79	0.92	0.29	0.98	1	1	1	1	0.56	0	0
ATAATTACGCAACTTAGTGCATCTAAAGGTTCTATACAACGTTTAATGGGGATTATAATTAGTGAAAATT	conserved hypothetical protein	SA0045	N315	0	0	0	1	0.43	0.0002	3_red	0	0.87	0.58	0.93	0.24	0.9	0.92	0.2	0.33	0.36	0	0.29	1	0
ATAATTGTATCGACTAAACAGCAACAATTGGATATATCAGCTCGAATAAATAATGAAATCCCTGTTCATA	glycosyl transferase, group 1 family protein	SA0052	COL	0	0	0	1	0.27	1	0_tan	0.119	0.02	0.02	0.01	0.05	0.03	0.02	0.07	0	0	0	0	0	0
ATACAAAGTGAAGAAAATGGTCTTACAAGAGCGAATTGATAATGTATTAAAACAAGGATTAGTGAGATAA	ORFID:SA1003~hypothetical protein, similar to fibrinogen-binding protein	SA1003	N315	1	1	1	0	0.22	0.5662	0_tan	0.0039	0.91	0.94	0.87	0.98	0.63	1	1	1	1	1	0.78	0	0
ATACAACAATGGTGAGTTTTCATATAATCCTGAAGCACCAATTTATTCGGCTAAATATCAATTACACAAC	Staphylococcus tandem lipoprotein	SA0482	COL	1	0	0	0	0.29	0.0268	0_tan	0	0.3	0.47	0.16	0.77	0.16	0.06	0.95	0.2	1	0.9	0.42	0	0
ATACAAGATGTCCAATTGCTCAAGATATGTGCAAAAAAAGTATGCCAGAATTAAAGGACATTGGTAATGA	oligopeptide ABC transporter, ATP-binding protein	SA0998	COL	0	0	0	0	0.28	0.8199	0_tan	0.0082	0.87	0.88	0.82	0.96	1	0.66	1	0.6	1	0.25	0.92	0	0
ATACACACATACTTTATGGCGTGTTTATAGTGCTCATCGGTATTGTGTTATTACGGTTATTCAAAATTAA	CAAX amino terminal protease family protein	SAR1862	MRSA252	0	0	0	0	0.26	0.7432	0_tan	0.0202	0.69	0.72	0.64	0.8	1	0.29	0.72	0.38	0.36	0.29	1	0	0
ATACACCTATTGTTTACTACACTAATAATTCTAAAGTGACCTTATTCGAAAGACCTAGTGAAGAAGTATT	hypothetical phage protein	SAR1529	MRSA252	1	0	0	0	0.21	0.5219	0_tan	0.6666	0.89	0.85	0.88	0.85	1	0.77	0.76	0.75	0.87	0.78	0.83	0	0
ATACAGGTGTGATGAAAAACCATGACGATTTGAAAAATAATTTCTCGACTGATTCTAAAAATTTAGTACC	epidermin leader peptide processing serine protease EpiP	SA1874	COL	1	0	0	0	0.36	0.0033	2_orange	0	0.32	0.57	0.22	0.82	0.3	0.1	0.71	1	1	0.29	0.7	1	0
ATACATTATTCTCGCATACGCTAGAAGGATTTGAAGGGAAAAAGAAAATTAATGCAATAATGACCAAATT	phosphoglucomutase/phosphomannomutase family protein	SA2501	COL	0	0	0	0	0.36	0.7996	0_tan	0.0003	0.87	0.89	0.78	0.97	0.6	0.96	0.89	1	1	1	1	0	0
ATACCGCAACAAGCAGAATTATTATTTTCGGGGAACCATATTAGAAACCAAGGATTTATCATCGATCATC	putative glutamine amidotransferase class-I	SAR0228	MRSA252	0	0	0	0	0.32	0.4282	0_tan	0.7487	0.62	0.56	0.6	0.57	1	0.06	0.29	0	0.11	0	1	0	0
ATACCTTGGTTTAGGTAAACTAGGATATTGGAGAGATACACATTTACGAATTCAAGGAGATGCAGTTGAT	putative cardiolipin synthase	SAR1328	MRSA252	0	0	0	0	0.32	0.7426	0_tan	0.7352	0.67	0.64	0.67	0.63	1	0.43	0.33	0.3	0.36	0.4	0.38	0	0
ATACGCCTGCTTACTACAAGTTATACGGCGATAAAATAGTTGGATTCGATACTAACGATTTCCCGATTAC	putative exported protein	SAR0436	MRSA252	1	1	0	0	0.24	0.8801	0_tan	0.7614	0.6	0.59	0.61	0.58	1	0.31	0.71	0.15	0.3	0.33	0.17	0	0
ATACGTGATGATGAATAGTAAGTTGTTTAGTCATGTATATATTAAAGATTGTAAAGTAAGGCAATCATTT	pathogenicity island protein	SA0900	COL	1	0	0	0	0.31	0.6096	0_tan	0.0161	0.73	0.69	0.63	0.81	0.98	0.24	0.82	0.44	0.87	0.5	0.62	0	0
ATACTATGGATGATAAGGGCAGATACGTCGATGAAAATGGAAAACTAATAAATAAGGATTATGACGTTTT	hypothetical protein	SAS0377	MSSA476	0	0	0	0	0.22	0.0002	3_red	0	0.37	0.65	0.1	0.95	0.31	0.19	0.97	1	0.5	0.71	0.87	1	0
ATACTGACAATATTAATAGCCAAGATACAAGTTATACACCTCAAGTAAAAGTAACAACACCAATTTTAGT	ORFID:SA0255~hypothetical protein, similar to PTS beta-glucoside-specific e	SA0255	N315	0	0	0	0	0.08	1	0_tan	0.0194	0.94	0.94	0.9	0.98	0.84	1	0.97	1	0.95	1	0.89	0	0
ATACTGCTGTTCAAGCGAGCCATATGGTAGATGGTAATATTACAGTGATTGATTCTAAATCTATTTCGTT	conserved hypothetical protein	VRA0003	Michigan	0	0	0	0	0.28	0.4978	0_tan	0.0002	0.7	0.75	0.62	0.88	0.79	0.56	0.84	0.75	0.85	0.57	0.79	0	0
ATAGAAAAAATCATTCGAAGAGTAAATGAAAATAAAAAGAAATATGGTTTTGAAAGTACTACTGAAGACA	ORFID:SAP031.~hypothetical proetin	SAP031	N315	0	0	0	0	0.38	0.1387	0_tan	0.7206	0.54	0.41	0.5	0.45	0.98	0.07	0.45	0.67	0.11	0.4	0.53	0	0
ATAGACGACCAATAGATATTCAAATTAATGACGGATATGAACTTATGGTCCGATCTTATTTCATCAACAA	conserved hypothetical protein	SA0329	COL	1	0	0	0	0.38	0.0205	1_yellow	0.2994	0.64	0.44	0.58	0.48	0.93	0.32	0.58	0	0.09	0.14	0.25	1	1
ATAGAGTGACGATTATTAAAAGTATTGAGTTATTAGAGGCTGAAGGATTTATCTATACTAAAGTGGGGAG	ORFID:SA0104~hypothetical protein, similar to transcription regulator GntR	SA0104	N315	0	0	0	0	0.16	0.315	0_tan	0.3313	0.94	0.97	0.94	0.97	0.85	1	0.97	1	1	0.88	1	0	0
ATAGATGGACCGAGTCATTGCGAGATACGCAAATAGACAACTTCAAAGAAATCATGTCACAAAAAAAGTA	conserved hypothetical protein	SA0071	COL	0	0	0	0	0.28	0.0088	1_yellow	0	0.47	0.67	0.28	0.94	0.31	0.23	0.91	1	1	0.6	1	1	0
ATAGCAAATCATTGAAGAACTCTAATGGTGAAAGTAAAAAAGCAGCTGATTTGATGAAAGACAACCTCAA	hypothetical protein	MW1390	MW2	1	0	0	0	0.51	0.1394	0_tan	0.8494	0.61	0.46	0.53	0.55	0.81	0.39	0.38	0.4	0.4	0.5	0.56	0	0
ATAGCCACAATTCATAGGAAAACCACTAATTACTGTAAAGAAAATAATTTTGATATACCAAGTTATAAAC	ORFID:SAP014.~probable transposase - Staphylococcus aureus transposon Tn552	SAP014	N315	0	0	0	0	0.31	0.1344	0_tan	0	0.27	0.39	0.18	0.61	0.04	0.17	0.46	0.88	0.2	0.89	0.92	0	0
ATAGCTAAAGAAAATAATAAAATTATAGGATTTGCATATTGCTATACACTTTTAAGACCTGATGGAAAAA	hypothetical protein	SAVP027	Mu50	0	0	0	0	0.39	0.7426	0_tan	0.0165	0.55	0.52	0.46	0.67	0.67	0.29	0.67	0.45	0.67	0.2	0.58	0	0
ATAGGTTATAGCAATATTGCTAGCTTAAAAGTGAATGAGTTTGATGAACGTTTTAAATTGAGTGTGTTAG	putative primase	MW0751	MW2	1	0	0	0	0.28	0.1471	0_tan	0.0041	0.08	0.15	0.06	0.21	0.06	0.03	0.13	0.5	0.17	0	0.25	0	0
ATAGGTTGGACAGTATTTATTTTATTATGGGGAACAACACTTTGGGGTATTTTATATAAATCCATAGCTG	hypothetical protein, similar to hemolysin III	MW2096	MW2	0	1	0	0	0.05	0.4649	0_tan	0.4868	0.99	1	0.99	1	0.98	1	1	1	1	1	1	0	0
ATAGTATTCAATTTTTAGAACCGAAAAACTCAAATGACACTCAACAAGATTTATATCAACAACAAGTACA	single-strand DNA-binding protein	SAV1983	Mu50	1	0	0	0	0.05	1	0_tan	1	0.99	0.99	0.99	0.99	0.97	1	1	1	1	1	1	0	0
ATAGTATTCACATTATTTGTAGCAGTTGCGATTATTATGAATGTATGGTTTACCCATCAAAACGTTAAAA	hypothetical protein	SA2118	N315	0	0	0	0	0.16	0.1526	0_tan	0.0002	0.91	0.96	0.88	1	0.73	0.98	1	1	1	1	1	0	0
ATAGTTTTATATTAGTTTTTATATTACTTTTTAACATTAAAGATCTTACGTATGCTCAAGGTGATATTGG	extracellular enterotoxin type I precursor	SA1646	N315	1	1	0	0	0.23	0.5085	0_tan	0.3726	0.89	0.86	0.85	0.9	0.89	1	0.92	0.4	0.2	0.33	1	0	0
ATATAAAAATTGATAGAGATGATCAACCTGATTTGGAGAACATCGAACATAACTATTTGAATAGTGGAGG	conserved hypothetical protein	SA2355	N315	0	0	0	0	0.13	0.1822	0_tan	0.0204	0.96	0.99	0.95	1	0.9	1	1	1	0.95	1	1	0	0
ATATAAAGAAGCAGGAAAGCCTACTTATCCTCATGAAAATTTATATCGAGGACGTAATCATAGTATTTCA	hypothetical protein	MW0047	MW2	0	0	0	1	0.41	0.2303	0_tan	0.0009	0.11	0.18	0.08	0.33	0.06	0.04	0.14	0.63	0.25	0	0.55	0	0
ATATAAAGGGATTAAAGCAGATGGTGGCAAGGTGAATCAAGCGAAACAATTAGCGGCAAAAATAGCTAAA	hypothetical protein	SA0278	N315	0	0	0	0	0.1	0.7095	0_tan	0.064	0.96	0.97	0.94	0.99	0.89	1	1	1	1	0.83	1	0	0
ATATAAAGTAATTACTAAAGATGCATTTGCATTACCTTACACAATTATTAAAGCAAAAAATCAACCAACA	hypothetical protein	SA0310	N315	0	0	0	0	0.09	1	0_tan	0.0189	0.94	0.94	0.9	0.98	0.82	1	1	1	0.95	1	0.88	0	0
ATATAACACCAAATTAGAACAGGAACGAAAGCAAAGATTGACTGATACAAATAAAGTTAGTGAAAATGCT	traA protein	VRA0008	Michigan	0	0	0	0	0.39	0.2065	0_tan	0.0008	0.36	0.25	0.39	0.11	0.59	0.16	0	0.17	0.23	0	0	0	0
ATATAATTACTGTTTACTGTCCTGAAAACGGAACTGCGACTGATGAATATTTTTGTGAAATTATATTTAA	hypothetical protein	MW1439	MW2	1	0	0	0	0.35	0.0429	0_tan	0.061	0.82	0.68	0.8	0.67	0.95	0.5	0.74	0.82	0.77	0.57	0.5	0	0
ATATAATTTAGAAGAACTTTCGATGAAAGAATACAATGAACTACAGGATGCATTAAAGAGAGCACTGGAT	staphylocoagulase precursor	SA0209	COL	0	1	0	0	0.25	0.5594	0_tan	0.0012	0.16	0.2	0.11	0.3	0.07	0.07	0.13	0.11	0.95	0	0.27	0	0
ATATACAGCCGAAAGTCAGATTAGAAATGCGACGAGTGCGAGTAAAGTAATGGTAATGAACCAAGGCCTT	conserved hypothetical protein	SAR2369	MRSA252	0	0	0	0	0.31	1	0_tan	0.2562	0.75	0.76	0.72	0.81	1	0.57	0.75	0.57	0.54	0.43	0.57	0	0
ATATACCAAGAGACGAATGGAATCGATTAGTAAATGAAGTAAATAATCAATACAGTTACCAAGCTGACAA	hypothetical phage protein	SAS0899	MSSA476	1	0	0	0	0.41	0.075	0_tan	0	0.26	0.41	0.17	0.7	0.11	0.18	0.54	0.75	0.77	0.63	0.75	0	0
ATATACTAGCAGAAATTAAGCCTATGCTCAATTTTGATGAGCAAATAGCGAAATTAAAACAGATGAATAT	ORFID:SA0355~hypothetical protein, similar to hypothetical protein virulenc	SA0355	N315	0	0	0	0	0.11	1	0_tan	0.1105	0.9	0.9	0.87	0.94	0.7	0.98	0.97	1	1	1	0.76	0	0
ATATACTGATGAGGGTAAACACTATTTAGAAGTCACAGTAGGGCAACAGCATTCTCGAATCACTTTACTT	exotoxin 3, putative	SA0468	COL	1	1	0	0	0.35	0.1718	0_tan	0	0.27	0.38	0.16	0.65	0.16	0.13	0.71	0.14	1	0.17	0.33	0	0
ATATAGAAGATTACAAAAAATCTGATGACATATTAATTAATTTGTATATAGAAACATATGAATTTTATTG	phage terminase small subunit, putative	SA0366	COL	1	0	0	0	0.45	0.4788	0_tan	0	0.43	0.5	0.27	0.69	0.38	0.37	0.64	0.25	0.69	0.7	0.58	0	0
ATATAGCAGACATGATAGAATTTTATATGTAAATCTTGTAGGTAATCGTTTTAAAAATAATATAAGTATG	hypothetical protein	SA2490	COL	0	0	0	0	0.11	0.0727	0_tan	0.0001	0.91	0.97	0.88	1	0.78	0.98	1	1	1	1	1	0	0
ATATATAGAGGACAGGAGTCTTTCGAATGAAGACGTTCTTTTTCAATCACTACGAACAAATCAAGTATTA	integrase/recombinase, phage integrase family	SA0678	COL	0	0	0	0	0.07	0.6491	0_tan	0.0384	0.89	0.92	0.86	0.95	0.73	0.98	0.97	1	1	1	0.78	0	0
ATATATTACAACTCAATGGCATGGAGTGTGACATCAATGTTAAAGAACCACTAAAGATTTATTATGTAGT	hypothetical protein	SA2259	COL	0	0	0	0	0.28	1	0_tan	0.1595	0.99	0.99	0.97	1	1	0.94	1	1	1	1	1	0	0
ATATATTTAATATTGTTTTTATTAAGCCTACCATTGTTATTATTTATCGGGAGAAAAACACATTTTTATT	hypothetical protein	SAV0915	Mu50	1	0	0	0	0.2	1	0_tan	0.6091	0.92	0.91	0.91	0.93	0.89	0.95	0.96	0.88	1	0.8	0.86	0	0
ATATCAAAGATGAGAACATAAAAAAAGAAATCGAGAACTTTAAGTTCTTCGCGCAATATGGCAGCTTTAA	putative lipoprotein	SAR0106	MRSA252	0	0	0	0	0.09	1	0_tan	0.0949	0.99	0.98	1	0.97	1	1	1	0.9	1	0.75	1	0	0
ATATCGGCCGAGGTTATATAACTATACTTGGACAATATAATGAACCAATTTTATTTGATGCACCTTTAAT	FtsK/SpoIIIE family protein	SA1578	COL	0	0	0	0	0.21	0.4628	0_tan	0	0.78	0.83	0.66	0.96	1	0.33	0.92	0.78	1	0.57	0.87	0	0
ATATCGTCGTTAAGCTGTTTTGGTTTACGTTTCATGGATTCTACCCCAATTTTCATAAATATAAAAATTC	hypothetical protein	SAS0393a	MSSA476	0	0	0	0	0.31	0.0283	0_tan	0	0.45	0.63	0.23	0.95	0.36	0.15	0.91	1	0.56	1	0.73	0	0
ATATCTAATATTAGTTATGAAATAGAAAATGCAAATGATAATAATTTAGATAATGAAAAAATTAGAGGGC	hypothetical protein	MW0074	MW2	0	0	0	0	0.37	0.1589	0_tan	0.1327	0.05	0.13	0.07	0.15	0.02	0	0	0.92	0	0	0.1	0	0
ATATCTTGAAACACGCAATGATATTCAAGGTGGTTCGTTAAAAACAGACTCAGGATTTGTAGTTATTCCA	capsid protein	MW1904	MW2	1	0	0	0	0.34	0.141	0_tan	0.0001	0.19	0.3	0.15	0.44	0.06	0.08	0.73	0.8	0.5	0	0.14	0	0
ATATCTTGTTTAAAATTAATATTAATCCTACTATTTTTACTTTCAATACTTTTGGTCATATATCAAACTC	hypothetical protein	SA1208	N315	0	0	0	0	0.26	0.1777	0_tan	0.0069	0.6	0.5	0.65	0.44	0.17	0.97	0.5	0.8	0	0.11	0	0	0
ATATGAAAAGCAACCTCAAAAAGATTACGACCCACAATTAGAGAAAGAACGAGAGGATTTTTTAAAACAA	replication protein Rep	SAP027	N315	0	0	0	0	0.42	0.5209	0_tan	0	0.21	0.17	0.3	0.02	0.8	0.05	0	0.57	0	0	0.1	0	0
ATATGCAATCACAAATGATGGCATTGTTATTAACGGCAAATGGTCATAAAGTCGTAACCGAAACAGTTTT	UDP-N-acetylglucosamine 1-carboxyvinyl transferase 1	MW2024	MW2	0	0	0	0	0.09	0.7966	0_tan	0.7973	0.93	0.92	0.92	0.93	0.79	1	1	1	1	1	0.75	0	0
ATATGCAGATAATTCTATTGATACAACAGATGGAAAATTCCATGGTCAATTACTTAATAATTTAAAATTA	hypothetical protein, similar to surface protein precursor	MW2416	MW2	0	0	0	0	0.15	0.0178	1_yellow	0	0.19	0.35	0.12	0.47	0.1	0.03	0.58	0.87	0.17	1	0.25	1	0
ATATGGTGAGAAAGAGTATAAGCAAGCGATAGATAAATTGATGACTAGAGTTTTGGGAGAAGATCATTAT	staphylocoagulase precursor	SAR0222	MRSA252	0	1	0	0	0.28	0.6466	0_tan	0.0847	0.56	0.51	0.59	0.45	1	0.25	0.15	0.11	0.18	0.13	0.25	0	0
ATATGTACAGGCAACTCATGTCGAAGTCAAATGGCTGAAGGTTGGGCTAAACAAATCTTAGCGGATGATT	arsenate reductase	SA1824	COL	0	0	0	0	0.19	0.6877	0_tan	0	0.84	0.87	0.74	0.98	1	0.44	0.96	0.73	1	1	0.88	0	0
ATATGTATGAACAGTAAAAATGAACCTACACATATTCAAACACTATCGATTGGATCTATTAACCAAACGG	ORFID:SA0053~truncated hypothetical protein, similar to DNA repair	SA0053	N315	0	0	0	1	0.42	0.1399	0_tan	0.0001	0.89	0.8	0.93	0.61	0.96	0.98	0.57	0.5	0.29	0	0.6	0	0
ATATTACAAATTCATGGCTCAAGCCTTTGCATATGACACATACATCATTCAAACAAACCAATAACAAATC	ORFID:SA2230~hypothetical protein, similar to beta-lactamase	SA2230	N315	0	0	0	0	0.01	1	0_tan	0.4873	1	0.99	1	0.99	1	1	1	0.93	1	1	1	0	0
ATATTACTATACACTTTTTATATTTGTCTATAATAAAAAGATTTCATTTTTACTCTATTATACATTTCAG	hypothetical protein	SAV1949	Mu50	1	0	0	0	0.5	0.2338	0_tan	0.1045	0.37	0.26	0.37	0.21	0.52	0.14	0.2	0.58	0.53	0	0	0	0
ATATTACTTATTTAAATAAAGGTGAAACGTCGCTAATCATGACGTTAGAAGGGCTACTAGATGTGTTGAA	hypothetical protein	SAR2270	MRSA252	0	0	0	0	0.22	1	0_tan	0.4888	0.77	0.76	0.74	0.79	1	0.53	0.67	0.5	0.55	0.5	1	0	0
ATATTATGTCACATAAGATTTGGTTATTAGTGCTCGTCTCCACGTTAATTCCATTAATACCATTTTACAA	methicillin-resistance MecR1 regulatory protein	SA0034	COL	0	0	0	1	0.3	0.0047	2_orange	0	0.83	0.64	0.99	0.11	0.82	0.91	0.25	0.55	0.77	0	0.56	1	0
ATATTATTTTTGATAAATATGATTTTGAAACAGTAATGTACTCACTTTTAAAATTAGAAGAAGCTAAATT	conserved hypothetical protein	SA0330	COL	1	0	0	0	0.38	0.1109	0_tan	1	0.75	0.61	0.68	0.69	0.97	0.48	0.82	0.14	0.3	0	0.5	0	0
ATATTCAATACAATCAAAGAATTGATAGAAAACAAAGAGATATCGAGTTATCAAATTAATAAAGATACTG	hypothetical protein	SA1331	COL	0	0	0	0	0.36	0.077	0_tan	0	0.77	0.88	0.6	0.98	0.85	0.48	0.97	0.83	1	1	0.77	0	0
ATATTGTAATTACTAAAACTTATTTTGAAAAATACACTAAACAAATTAAAGCAGCACAGATGATATTAGA	truncated Pre protein	SAP025	N315	0	0	0	0	0.24	0.8438	0_tan	0	0.82	0.84	0.71	0.96	1	0.37	0.96	0.94	0.44	1	0.88	0	0
ATATTGTTGATGAAACATATGAATATATTTTAACTGTTGTAAAAGCAGGTATGACTGAAAAAGAATTAAA	Xaa-Pro dipeptidase	SAV1530	Mu50	0	0	0	0	0.04	0.6017	0_tan	0.1139	0.98	0.99	0.97	1	0.95	1	1	1	1	1	1	0	0
ATATTTAGTAGAAGTAAAGAAGAAGCATTTATTATGTTGACAGCGTTGAGTTCGTTCCAAGTAACAAAAT	hypothetical protein	SA0401	N315	1	0	0	0	0.19	0.5137	0_tan	1	0.9	0.86	0.88	0.88	0.75	1	0.84	0.73	1	1	0.69	0	0
ATATTTATTAGGATTTGCTGAACGCGAAGAATCTACAAAACAAGATACTATCGCCGCGCACTTAGATGGA	transcriptional regulator, Cro/CI family	SA0890	COL	1	0	0	0	0.41	0.0635	0_tan	0	0.39	0.55	0.18	0.95	0.34	0.18	0.89	0.62	0.83	0.5	1	0	0
ATATTTGGAGTGTAAGCGATGATTTAGGACATCATGACGGACTTGTTAAAAGGTGTATCGATGATTTAAC	hypothetical protein	SAV0897	Mu50	1	0	0	0	0.25	0.246	0_tan	0.0048	0.85	0.91	0.82	0.95	0.8	0.95	0.95	0.9	0.85	0.86	0.93	0	0
ATCAAAATCAATTGCAGATTCTGTTAGTGGCCAATTAAATCAAGTCGACAATAATGTGAATAAGCTACAT	hypothetical protein	SA0272	COL	0	0	0	0	0.41	0.0431	0_tan	0	0.43	0.61	0.27	0.93	0.23	0.18	0.88	0.57	0.95	0.67	1	0	0
ATCAAAATCTGATGATAAAGGACGTAAGAAAAAGGGTAGTCAACGTAAAGGTAAAAATGAACGCAAAAAT	ribonuclease R	MW0742	MW2	0	0	0	0	0.41	0.1226	0_tan	0.0022	0.2	0.32	0.18	0.42	0.15	0.09	0.64	0.86	0.33	0	0.43	0	0
ATCAAAGTTGGATCACAACCAGTTCAAAATAATCAAGAAGTAAGTTCGGAACAAACAAAAAAGAATTTTG	hypothetical protein	MW0395	MW2	1	0	0	0	0.25	0.0681	0_tan	0.0016	0.11	0.22	0.09	0.28	0.05	0.03	0.26	1	0	0	0.1	0	0
ATCAAATTAATCAATTGGGGAAAGAATATGGTGAGGTAACTGATGAAGATATCTACAATATCATCCGTAA	membrane anchored protein	SAR2119	MRSA252	0	0	0	0	0.31	0.7014	0_tan	0.3332	0.81	0.78	0.77	0.83	1	0.6	0.9	0.63	0.55	0.43	0.89	0	0
ATCAACGGGGATGTTCCTATATTCATTAACATTGGTGAATGGGACGGAGACGATGAGGAATTAGATAAAA	putative terminase small subunit	SAR0382	MRSA252	1	0	0	0	0.14	0.2196	0_tan	0	0.88	0.94	0.83	0.99	1	0.61	1	1	1	0.8	1	0	0
ATCAACTGGAATTAGAAGACTGCGAAAAATATACAGACGAACAAGTTAAAGCAATGAGTCATAAAGAAGT	hypothetical protein	MW1421	MW2	1	0	0	0	0.22	0.4466	0_tan	0.0015	0.89	0.93	0.84	0.98	1	0.71	1	1	0.88	0.88	0.94	0	0
ATCAATAAAAAAGAAACATTTTTAACTGATATGCTTGAAGGATTGTTAATTGCGCACCCAGAGTTAGATC	dihydroxyacetone kinase family protein	SA0707	COL	0	0	0	0	0.02	0.2239	0_tan	0.4979	0.98	1	0.98	1	0.97	1	1	1	1	1	1	0	0
ATCAATATTCAGTACCAGCAATGTGTAAAGTCCTAAAAATACCAAGAAGTACCTATTATGATTCTATAAA	truncated transposase	SA1623	N315	1	0	0	0	0.1	0.0929	0_tan	0.0352	0.93	0.98	0.93	0.99	0.87	1	1	1	1	0.71	1	0	0
ATCACAAAACAATCAACTTAATAATAATTCAGATCCATCTAATAATACTCCTGCAAATATAAATGAAAAC	hypothetical protein	MW1438	MW2	1	0	0	0	0.28	0.2667	0_tan	0.3638	0.9	0.84	0.89	0.83	0.95	0.76	0.95	0.85	0.85	0.83	0.8	0	0
ATCACTAGAAAAGAAAAAGGTGACACACAAAAGAAAGTTGCTAGCAAACTTGATATTAGTCCACAACGTT	hypothetical protein	MW0747	MW2	1	0	0	0	0.39	0.0694	0_tan	0	0.23	0.37	0.07	0.77	0.13	0.19	0.67	0.7	0.22	0	0.79	0	0
ATCACTAGTCCTACAGAAGCGAGAAAAGATTTTTATCAATTACTAAAAAATGTTAATAATAATCACGAAC	hypothetical protein	SAV2457	Mu50	0	0	0	0	0.2	0.275	0_tan	0.0003	0.84	0.9	0.78	0.96	0.43	0.98	1	1	1	1	0.75	0	0
ATCACTCTCGTTGAAAAAACAAATTTTTTAGGGGTAAATGGCTCGGCTACGTATCAAATTACTTTGAATC	hypothetical protein, similar to acyl-CoA dehydrogenase family protein	MW0149	MW2	0	0	0	0	0.28	1	0_tan	0.0123	0.91	0.91	0.86	0.98	1	0.63	1	0.93	0.57	1	1	0	0
ATCACTTCCAAGATGTTAATAATGTTGTTAATGCGCTAAGGGATAAAGGATTTATCGAATCTGACCATGA	conserved hypothetical protein	SA0043	COL	0	0	0	1	0.43	1	0_tan	1	0.03	0.02	0.02	0.02	0.05	0.02	0	0	0	0	0	0	0
ATCAGGATGCACAAAAAGATGCTTTTGAAAAATTAAAGGATATTGTAAATCAGCATAATCATGTTCTATT	conserved hypothetical protein	MW0214	MW2	0	0	0	0	0.13	0.3052	0_tan	0.001	0.94	0.97	0.91	1	0.79	1	1	1	0.95	1	1	0	0
ATCAGTTCAGTAATGGTTAAACAGCCAAAAGGTGAAATTATGAAATCAAGAGGGATGTATCTATTTTTAA	hypothetical protein	SA0398	N315	1	0	0	0	0.34	0.5664	0_tan	0.4057	0.8	0.75	0.8	0.73	0.72	1	0.77	0.4	0.4	0.2	0.5	0	0
ATCATAATGATGATGAACAAAATGTAGAATATGATTTTTATAATTTAAATGGTGAGTATGGTTATGAGGT	ORFID:SA1429~enterotoxin homolog	SA1429	N315	0	1	0	0	0.21	1	0_tan	0.4021	1	0.99	0.99	1	1	1	1	0.92	1	1	1	0	0
ATCATACCTTAAATAAAGACGATGTTATTAAAGAAGGATTTTCATATCATGAGAGACGCATTCACAATGA	hypothetical protein	MW0750	MW2	1	0	0	0	0.35	0.0319	0_tan	0	0.14	0.29	0.06	0.57	0.13	0.08	0.6	0.73	0.18	0.17	0.3	0	0
ATCATAGTTTACCTCAATTAACTCGAAAAAAACTAACAGAAAGACTAATGACTATATCAGGAAAGATTGG	O-nucleotidylltransferase(9)	SA0049	N315	0	0	0	1	0.38	0.0163	1_yellow	0	0.93	0.78	0.95	0.61	0.98	0.98	0.63	0.17	0.5	0.2	0.56	1	0
ATCATATCATTACACAGCGAGATGATCGCAATAAAAATGTGAGATATTGGCGCAAAGAAGTAACAGTAAC	putative membrane protein	SAR2588	MRSA252	0	0	0	0	0.36	0.313	0_tan	0.6001	0.69	0.61	0.67	0.61	1	0.39	0.42	0.11	0.33	0.33	0.3	0	0
ATCATATTAAGAATCATGGATTGTTTATCCCTATGATTTTTATGTTTTTATTAGGTGCATTTACAAAATC	Na1/H1 antiporter, MnhA component, putative	SA0679	COL	0	0	0	0	0.04	0.0238	1_yellow	0.0286	0.95	1	0.96	1	0.92	1	1	1	1	1	1	1	0
ATCATTAGTACCAGATAGATGCTTCTTAATTATCTCTGAAGAAGTTGAAAGATTTATGGAAAATGCATAC	hypothetical protein	SA2543	COL	0	0	0	0	0.37	0.2407	0_tan	0	0.55	0.65	0.34	0.93	0.39	0.25	1	0.93	1	0.8	0.67	0	0
ATCATTATTGCTGATCATAACATGTCTCGAAACGAAGCAATCGATACGTTGATTCATCAACTTAAAGTGT	putative PTS transport system, IIABC component	SAR2720	MRSA252	0	0	0	0	0.26	1	0_tan	0.6416	0.88	0.89	0.88	0.9	1	0.71	0.82	0.89	0.82	0.75	1	0	0
ATCATTGGATGATGGATTCGAAGACGCCTTTCAATATACCGTACAAGGAAATTCCCACAATCGACTAAAG	truncated transposase	SAVP025	Mu50	0	0	0	0	0.46	0.855	0_tan	1	0.64	0.61	0.62	0.64	0.74	0.49	0.63	0.43	0.73	0.25	0.8	0	0
ATCATTTAAATGACAAGGGTCATACTGTATCAAGACGAAAGATAGGTCGTATCATGAAAAAATATAATCT	transposase	SAR0082	MRSA252	0	0	0	1	0.28	1	0_tan	0.3486	0.97	0.98	0.99	0.96	1	0.97	1	1	1	0.4	1	0	0
ATCCAAACAATCGACAGAGAGTATTGCGCGCTATCGAATACTATTTTAAAACAAAAAAACTTTTAAGTAA	putative tRNA delta 2-isopentenylpyrophosphate transferase	SAR1278	MRSA252	0	0	0	0	0.25	0.7309	0_tan	0.0155	0.73	0.76	0.68	0.84	1	0.31	0.82	0.56	0.5	0.67	1	0	0
ATCCACATCATTAAGTGGTTCTACAAGTGAAAGTAAATCCGATTCAACATCAATGAGCATAAGTATGTCT	LPXTG cell wall surface anchor family protein	SA2676	COL	0	0	1	0	0.15	0.0932	0_tan	0.0098	0.9	0.96	0.89	0.98	0.68	1	0.97	1	1	1	1	0	0
ATCCGTGAAGATATATGGAGTAAGTTAGCAAATGAATGGAATATAGGAAATTCACTTCTATACAATGAAA	conserved hypothetical protein	SAP008	N315	0	0	0	0	0.32	0.6405	0_tan	0.0106	0.55	0.51	0.45	0.66	0.23	0.79	0.67	0.33	0.25	0.29	0.73	0	0
ATCCTGATGATGTAGTTGAAGTTTTTGGAGTATCGAAAACACATGCAAAATCCACACTTTCGAGACTTAA	hypothetical protein	MW1429	MW2	1	0	0	0	0.48	1	0_tan	0.0001	0.61	0.62	0.47	0.82	0.72	0.49	0.77	0.67	0.33	0.5	0.69	0	0
ATCGAGGGTTTATTTATATCTATAGAAGTCAAATTACTTTTAACTTTATTCATTGTACATGTTAATGGTA	hypothetical protein	SA1959	COL	0	0	0	0	0.47	1	0_tan	0.2428	0.95	0.94	0.91	0.97	1	0.74	0.95	0.8	1	1	1	0	0
ATCGATAAAAAAACTTTTAGCGAAAGACTTAGTAGTTGAATCGCACAATGAATTTAACAAAAGAGAAGTT	transcriptional regulator, MarR family	SA2524	COL	0	0	0	0	0.26	0.0014	3_red	0	0.43	0.67	0.16	0.99	0.35	0.22	0.96	0.69	1	0.71	1	1	0
ATCGCAAGGTTCTCATGTTCTGCTACAGTTTGCGGTCTTTGGAAGATATATCATTTACTATTATTAACAT	hypothetical protein	SA1884	COL	0	0	0	0	0.23	0.0518	0_tan	0.0003	0.91	0.98	0.88	1	1	0.58	1	1	1	1	1	0	0
ATCGCGTTAGCTACTGATTATAATCCAGGCAGCAGTGTAACGAATAACTTGCAACTTGTTATGGCCATTG	imidazolonepropionase	SA2121	N315	0	0	0	0	0.21	0.287	0_tan	0.0002	0.69	0.61	0.76	0.5	0.51	0.98	0.47	0.6	0.45	0.29	0.29	0	0
ATCTAAAAAGTTAAATTATACAAAAACGAAAGATGAAGATGGTACTCAAGGTGATACAGTCCTTGTGAAT	multicopper oxidase protein	SAR0721	MRSA252	0	0	0	0	0.36	0.197	0_tan	0.6149	0.57	0.45	0.49	0.55	1	0.03	0.5	0	0	0	0	0	0
ATCTAGAAGAGTTTTATGATAAAGAAGGATATAGAGATGGAGAATTTGAAAAAGATGATAAAGGGACTTG	hypothetical protein	SA0404	N315	1	0	0	0	0.3	0.7946	0_tan	0.0122	0.9	0.91	0.86	0.98	0.8	0.98	1	0.63	0.75	1	1	0	0
ATCTAGAGAGCAATTATCAGTCGAAGAATACGAAACATTCTTTAACAGATTTGATAATCAAGAATTTGAT	HMG-CoA synthase, truncation	SA0029	COL	0	0	0	1	0.4	0.1061	0_tan	0.0227	0.73	0.85	0.71	0.88	1	0.31	0.82	0.83	0.78	0.4	0.94	0	0
ATCTAGTTCTCTTAATTAAGTTCTTATCAAAAAAACTTATCCACCTGTACTGGATAGATATGACCATCAA	hypothetical protein	SAV0396	Mu50	0	0	0	0	0.41	0.0219	1_yellow	0	0.25	0.44	0.11	0.76	0.26	0.16	0.73	0.33	0.75	0.29	0.55	1	0
ATCTATTTGCTATAGCTGCACTATGTTTAGTCATGATTATATGTTATCCAATTACATTAATTATTGTCTC	capsular polysaccharide synthesis enzyme Cap5K	SA0154	N315	0	0	1	0	0.24	0.6089	0_tan	1	0.77	0.73	0.75	0.74	0.43	1	0.96	0.11	0.95	0.2	0.5	0	0
ATCTCGAAACGGTATCAAAAATTGATTGTCGTACCATTATTTTTATACGACGGAAGGCTTGTTAACAAAG	hypothetical protein, similar to NirR	MW2323	MW2	0	0	0	0	0.06	1	0_tan	0.4978	0.99	0.99	0.98	1	0.96	1	1	1	1	1	1	0	0
ATCTGCACATAAACTATATAGTGATAATGGGTATGTTAGCAATACATCTGGGTTTACTAAACAACTATAA	acetyltransferase, GNAT family	SA2012	COL	0	0	0	0	0.39	0.0156	1_yellow	0	0.26	0.46	0.19	0.69	0.18	0.07	0.64	0.92	1	0	0.42	1	0
ATCTGGCATTTTATACCAAATTTACGAGGCACACCCAGATGCTGATATGTATTTGCATTTAGGCGATTCA	conserved hypothetical protein	SAR1125	MRSA252	0	0	0	0	0.18	0.0628	0_tan	0.0006	0.86	0.94	0.83	0.98	1	0.72	0.96	0.92	0.7	0.9	1	0	0
ATCTTAGCATTAGTAAATCAATTCTTAGCGAATAAAGGTATAAGTCCGATACCAGTAGATGAAGAAAGTG	holin, SPP1 family	SA0388	COL	1	0	0	0	0.18	0.7806	0_tan	0.0032	0.94	0.93	0.88	0.99	1	0.82	0.96	0.93	0.93	0.89	1	0	0
ATCTTGATTTTGGTGATATTACATCAGCATATGTTGTAATGGTTAATACAAAATTCCAATATACAAATAG	Ser-Asp rich fibrinogen-binding, bone sialoprotein-binding protein	SA0520	N315	0	1	1	0	0.23	0.8541	0_tan	0.5789	0.79	0.81	0.78	0.82	0.36	0.97	0.85	0.85	1	1	1	0	0
ATCTTTATTATTTTGCAGCTGTACAAAACCATTATGATTTATTTAATTATTGGTTGATGGGTTCGATTTC	hypothetical protein	SA0283	COL	0	0	0	0	0.18	0.1711	0_tan	0	0.86	0.92	0.8	0.98	0.54	0.98	1	1	0.95	1	1	0	0
ATCTTTGTACTAACTCTAACAAGTTATTAGATAAACTTCACAAAGCATTAAAAGATCGTGAAGAGTACAA	conserved hypothetical protein	SA0355	COL	1	0	0	0	0.42	0.2845	0_tan	0.0317	0.3	0.39	0.29	0.49	0.16	0.48	0.45	0.13	0.64	0	0.5	0	0
ATCTTTTAGCAAACGTAATGAAACAAGCTAGAATATTATTCGATGAATCTAAGGCGATGATAAAAGCTAG	terminase large subunit	SAS0932	MSSA476	1	0	0	0	0.44	0.1518	0_tan	0.7198	0.69	0.56	0.64	0.6	0.86	0.48	0.31	0.67	0.64	0.6	0.7	0	0
ATGAAAAAAACAGCATTTACATTACTTTTATTCATTGCCCTAACGTTGACAACAAGTCCACTTGTAAATG	enterotoxin P	SAV1948	Mu50	1	1	0	0	0.38	0.5065	0_tan	0.1133	0.62	0.56	0.64	0.49	0.97	0.17	0.3	0.78	0.62	0	0	0	0
ATGAAAAAATTCCCCTTTCTATAGAAGATAGAAAAGAAGTGAAAACTTATTTAGATGACGCTAGAAACAA	hypothetical protein	VRA0055	Michigan	0	0	0	0	0.34	0.212	0_tan	0.0003	0.32	0.23	0.37	0.09	0.56	0.14	0	0.17	0.25	0	0	0	0
ATGAAAACATGTGAACAAATTAGTTACCATGATTTTAAGCACAATAATGTTTGGTATATTGTTAAAATTG	hypothetical protein	SA1559	COL	0	0	0	0	0.28	0.4541	0_tan	0.0021	0.94	0.97	0.9	1	0.96	0.78	1	1	1	1	1	0	0
ATGAAAGTTCTATCGCAGATGACACACCAGAGGGACGTAGTATTGTGAAATTAGCTTATAAACAACATAT	ORFID:SA0070~potassium-transporting ATPase B chain homologue	SA0070	N315	0	0	0	1	0.34	0.0003	3_red	0	0.86	0.61	0.98	0.16	0.88	0.86	0.22	0.38	0.6	0.17	0.5	1	0
ATGAAAGTTGCCTTTTTATTTTTGGTAAAAGTTCATGCGTCAGTGAATTGTGTAAGTTTTTCAAAAAGTA	hypothetical protein	SAS046	N315	0	0	0	0	0.07	1	0_tan	1	0.99	0.99	0.99	0.99	1	1	1	0.93	1	0.83	1	0	0
ATGAAATATCTCTACCATCGTTGTTAAAACAGTTATCCAATATTTCATATACGAACAGTGCAACGTTCCC	ORFID:SA0182~hypothetical protein, similar to indole-3-pyruvate decarboxyla	SA0182	N315	0	0	0	0	0.1	0.672	0_tan	0.6767	0.9	0.87	0.89	0.87	0.73	0.98	0.89	1	0.95	1	0.67	0	0
ATGAAATGACTTTGATGATTATGTTGAAGTCATTTCTTTATTTTTGTCTAATTTTCAATCAAATTGATAT	hypothetical protein	SA1273	COL	0	0	0	0	0.31	1	0_tan	0.311	1	0.99	0.98	1	1	0.96	1	1	1	1	1	0	0
ATGAAATTGAATTTATTTTATATAACTTTAACATCGCTGTTAACAATATTATTACTAGCAATATCTAACA	hypothetical protein	MW0748	MW2	1	0	0	0	0.34	0.0896	0_tan	0	0.12	0.23	0.04	0.45	0.11	0.06	0.46	0.62	0.09	0.14	0.27	0	0
ATGAACATGTTGTTACATGATGTACGTTATGAGAACTTTGATATCCGTAATGATGATACGTTGGAAAATC	type I restriction modification system modification protein	SAR1899	MRSA252	1	0	0	0	0.18	0.2362	0_tan	1	1	0.98	0.99	0.99	1	1	0.94	1	0.93	1	1	0	0
ATGAACGAGCAAATAATAGGAAGCATATATACTTTAGCAGGAGGTGTTGTGCTTTATTCAGTTAAAGAGA	hypothetical protein	MW1914	MW2	1	0	0	0	0.27	0.0331	0_tan	0	0.41	0.58	0.17	0.91	0.38	0.25	0.84	0.92	0.5	0.83	0.83	0	0
ATGAAGATTATGCAAGATATTCTGAAAAATATAATGATTTAATATCGGAATTTGATAATGAAGATATCTA	conserved hypothetical protein	SA2190	COL	0	0	0	0	0.21	0.2307	0_tan	0	0.8	0.87	0.72	0.97	1	0.18	0.96	1	1	1	0.82	0	0
ATGAAGGGAGATAAAGAAGCACATGCCACTCCCTTTCACGACAGAAAGGGGGTGAAAAGCATGAAACCAT	hypothetical protein	SAV0395	Mu50	0	0	0	0	0.65	0.0778	0_tan	0.0003	0.74	0.9	0.66	0.96	0.77	0.79	1	0.88	0.89	0.75	1	0	0
ATGAAGTATTTGATGAATTGTATCTTGCGATTTTAAAATATTTAAATACAGTAAGTATAGAGAACATAAG	hypothetical protein	MW2395	MW2	0	0	0	0	0.19	0.0036	2_orange	0	0.44	0.65	0.24	0.91	0.23	0.15	1	1	1	1	0.6	1	0
ATGACTATGACATATAACGCGCGCAAAGAATACTTAAACCAATTTTTCGGATCTAAGAGATATCTGTATC	hypothetical protein	SA1786	N315	1	0	0	0	0.09	0.4931	0_tan	1	0.99	1	0.99	1	0.98	1	1	1	1	1	1	0	0
ATGACTGATGCAATGGAGGATTTCGACGAAATAGAAAATAACGATGATGTATGGTCTGAGACGTTAGAAA	hypothetical phage protein	SAR1525	MRSA252	1	0	0	0	0.27	0.0316	0_tan	0	0.78	0.62	0.86	0.47	0.97	0.65	0.28	0.42	0.82	0.56	0.36	0	0
ATGAGCGACACATATAAAAGCTACCTAATAGCAGTGCTATGCTTCACGGTCTTAGCGATTGTACTCATGC	hypothetical phage protein	SAR1546	MRSA252	1	0	0	0	0.25	0.0227	1_yellow	0.0119	1	0.94	1	0.93	1	1	0.88	0.78	1	0.88	1	1	1
ATGAGTGATGGAGGATTGATTGATGTGAAGAATTGTTACAATAATTTTTGGATGTCGTGTTTAGTCAATG	hypothetical protein	MW2133	MW2	0	0	0	0	0.37	0.1125	0_tan	0	0.6	0.73	0.29	0.99	0.5	0.33	0.92	1	0.57	1	0.93	0	0
ATGATAAAAAAATGATTAATCGTATTAATAGAATACAAGGGCAACTAAATGGAATTATTAAAATGATGGA	conserved hypothetical protein	SA0062	COL	0	0	0	0	0.32	0.6408	0_tan	0.3533	0.85	0.89	0.84	0.9	0.54	1	0.9	1	0.95	0.25	0.7	0	0
ATGATAAAAGTGATAAAAATGCTGTTAATAAAGAAGAAAAACACGATAACGGTACAAATAATTCTGAAGA	hypothetical protein	MW1739	MW2	0	0	0	0	0.44	0.2297	0_tan	0	0.69	0.79	0.49	0.97	0.89	0.04	1	1	0.33	0.33	1	0	0
ATGATATACAATTTCGATTATAGTTTGCTGTACGAAAGAATGGCAGAGTATAGATATAGCCAAAGTTCTT	hypothetical protein	SAV1997	Mu50	1	0	0	0	0.28	0.0144	1_yellow	0	0.39	0.59	0.28	0.81	0.31	0.59	0.84	0.55	0.15	0.43	0.67	1	0
ATGATCAATTTGATAAAAACGATAAAGGCACATGGATTATTAATTCTGAAATGGTTGTTCAACCTAAAGG	hypothetical protein	SA0096	N315	0	0	0	0	0.44	0.2608	0_tan	1	0.76	0.67	0.71	0.71	0.03	1	0.71	1	0.5	1	0	0	0
ATGATTGAAGTAGATGCTACAAATCTTGTGAAAACGAGAAATCATTATAAAAACAGCTTTAAAAATAAAG	2-oxoisovalerate dehydrogenase, E2 component, dihydrolipoamide acetyltransf	SA1560	COL	0	0	0	0	0.26	0.579	0_tan	0.0108	0.9	0.94	0.87	0.98	0.56	1	0.96	1	1	1	0.86	0	0
ATGATTTTATGTAATAACTTCAGTTATAGAGTGAATGAAACAGCAGCTAGAGTGCTAAATTATGTTGCTT	ORFID:SA0077~hypothetical protein, similar to serine/threonine protein kina	SA0077	N315	0	0	0	1	0.26	0	3_red	0	0.7	0.38	0.88	0.02	0.78	0.81	0.06	0.08	0.11	0	0	1	0
ATGCAACTTAAAATACTCTATTACAAAAAAATTATTAAATGGAAGTATCGATTTAAATGATTTGAAAGAA	conserved hypothetical protein	MW0379	MW2	1	0	0	0	0.36	0.0138	1_yellow	0	0.11	0.28	0.07	0.51	0.1	0	0.5	1	0	0	0.4	1	0
ATGCAATTAGGTAAGTACGAACCAATGGAAGGTACTGAGAAGAAGTTTACTTTTTGGGCTGATAAACCAG	hypothetical protein	SAV0891	Mu50	1	0	0	0	0.25	0.2234	0_tan	0.0018	0.8	0.88	0.76	0.94	0.72	0.91	0.94	0.9	0.89	0.63	1	0	0
ATGCACTCGAAGAAGTGAGAAAAGGCTATTACCCAATTAAACGTGCGATTGACTTAGTATTAAGTATCGT	ORFID:SA0124~hypothetical protein, similar to glycosyltransferase TuaA	SA0124	N315	0	0	0	0	0.04	1	0_tan	0.1195	0.97	0.97	0.95	0.99	0.92	1	1	1	0.95	1	0.94	0	0
ATGCGATAAAGAAGGATGAAAATGGCAGACCTCAGGATAAGCAAATAGAATATCCCGTTAAAATGATTGA	hypothetical protein	SA0094	N315	0	0	0	0	0.19	0.673	0_tan	0.0001	0.86	0.88	0.78	0.97	0.66	1	1	0.69	0.33	1	1	0	0
ATGCGGATTTACAACGCTAAGCCTATTTTCCTGACGAATCCCTCGTTTTTAACAACGTTAAGAAAGTTTT	IS431mec, transposase	VRA0034	Michigan	0	0	0	0	0.41	0.0564	0_tan	0	0.13	0.27	0	0.64	0.17	0.08	0.44	0.13	0.18	0.25	0.67	0	0
ATGCGTAAGGAGGTGAAAAGCCTCATGCTAGACATAATAAAAACACTTCTAGAACATCAAGTATTGGCAG	hypothetical protein	SA0909	COL	0	0	0	0	0.25	0.2468	0_tan	0.057	0.91	0.86	0.93	0.84	0.91	0.94	0.89	0.78	0.89	0.63	0.8	0	0
ATGCTAAAAACACAAATGTTACTATAAAAAGTGGTGGTGTAGCAGATAATGGTGATTATTATACTGGAGA	bone sialoprotein-binding protein	SAR0567	MRSA252	0	0	0	0	0.36	0.7378	0_tan	0.596	0.66	0.63	0.62	0.68	1	0.32	0.58	0.14	0.33	0.17	0.5	0	0
ATGCTAGTCAATGGGATTATGATTCCTATCACAGCATTTTTAATTGAACGTTTTACATTACGTTCTTTAT	putative transporter protein	SAR0094	MRSA252	0	0	0	0	0.26	0.1797	0_tan	0.4452	0.59	0.48	0.56	0.49	1	0.17	0.43	0.08	0.23	0.13	0.27	0	0
ATGCTATTTGTCATTTTAGTTTTATATATCATTGGTATTACATTTATTCTACTCAGTGTTTTTGGTTCAA	hypothetical protein	MW0405	MW2	0	0	0	0	0.2	0.7341	0_tan	0.0004	0.94	0.96	0.89	1	1	0.77	1	1	0.87	1	1	0	0
ATGCTTAAATTAATACTTAAAAGGTTAGGGTTAATGATCCCGTTACTAATTTTAATCTCAATAGTTGTAT	probable oligopeptide transport system permease protein OppB	SA0853	N315	0	0	0	0	0.09	1	0_tan	0.0411	0.98	0.98	1	0.96	1	1	0.96	0.91	1	0.33	1	0	0
ATGCTTCCAAAGATAAAGAAATTAATAATACTATTGATGCAATTGAAGATAAAAATTTCAAACAAGTTTA	penicillin binding protein 2 prime	SA0038	N315	0	0	0	1	0.33	0.0191	1_yellow	0	0.86	0.7	0.98	0.21	0.94	0.9	0.17	0.67	0.77	0	0.44	1	0
ATGGACAGATTGATACACTTGAGGAATATGGTTGTGAACGTATCTTTAGCGAGAAAGCGAGTGGTCGTAA	truncated resolvase	SAVP030	Mu50	0	0	0	0	0.38	0.041	0_tan	0	0.19	0.35	0.01	0.81	0.18	0.08	0.79	0.44	0.14	0.5	0.8	0	0
ATGGATACGGGTTGCTTGATAGTAATATTTATATGTCAAAAGAAATAGCACAAAAATTTTCAGAGATGGT	D-alanyl-D-alanine carboxypeptidase VanY	VRA0042	Michigan	0	0	0	0	0.52	0.7046	0_tan	0.0013	0.05	0.07	0.02	0.26	0.04	0.02	0.4	0.33	0	0	0	0	0
ATGGCAGCAACAAAATTGATTGTGAAACTATTTATGAAATAAAAAATTTTCTAACTTCAAATATTAGAGT	hypothetical protein	SAR0414	MRSA252	1	0	0	0	0.4	1	0_tan	0.0001	0.67	0.68	0.56	0.88	1	0.09	0.7	0	0.44	0.5	0.92	0	0
ATGGCAGCTAGTAACACAACGAACACATTGAAAGATGGTACTAAGAAGCGAATACGTTATTATTCTTGTA	site-specific recombinase	SAS0032	MSSA476	0	0	0	0	0.31	0.5952	0_tan	1	0.01	0.03	0.02	0.02	0.03	0	0	0	0.08	0	0	0	0
ATGGCGATGATGAGGAATTAGATAAGGCAGTGAAAGATGTATCTAACGCTAATCCTAATCATACTGTGAT	phage terminase family protein	SA0906	COL	1	0	0	0	0.22	0.5485	0_tan	0	0.83	0.86	0.72	0.97	1	0.33	0.88	1	1	0.67	1	0	0
ATGGCTTAGCTATAAAAGCAATTAACAAAGTGCAACAATCTAAGTATCTTAAATTAAAAGGTGTACATTG	diaminopimelate decarboxylase	SAR1412	MRSA252	0	0	0	0	0.43	0.27	0_tan	1	0.73	0.63	0.68	0.7	1	0.32	0.78	0.14	0.4	0.5	0.2	0	0
ATGGGAAAAAATATACCTATGAATTAGCCGAACAGTTTTCTAAAGAGAAGTCGGGTGGTCAAAAAGCAGA	hypothetical protein	SAV0400	Mu50	0	0	0	0	0.49	1	0_tan	1	0.09	0.09	0.09	0.09	0.04	0.03	0.17	0	0.58	0	0	0	0
ATGGGCTTAACAGAAACAGCTTACCAATTCACAGCTGGTGTACTTAAAAACGCACGTGGATTTACAGCGG	glutamine-ammonia ligase	MW1192	MW2	0	0	0	0	0.25	0.1163	0_tan	0.001	0.05	0.13	0.03	0.17	0.02	0	0.17	0.43	0	0	1	0	0
ATGGTCACAGAGTCCATAATGCATTTAAAAATAGAAACTACACTGTGAAATATGAAGTCAATTGGAAGAC	gamma-hemolysin component C precursor	SAR2510	MRSA252	0	0	0	0	0.26	0.2542	0_tan	0.0112	0.78	0.85	0.74	0.9	1	0.44	0.94	0.78	0.7	0.67	1	0	0
ATGGTCATAAAGTTGTAACACCAGGACAAGCTAGTATTAGAATTCATCACTTTTGTGCTGTACCTCAAAT	putative exported protein	SAR0845	MRSA252	0	0	0	0	0.21	0.7198	0_tan	0.0718	0.78	0.81	0.75	0.86	1	0.54	0.92	0.64	0.5	0.6	1	0	0
ATGGTTAGAGCATTACAAGACACATTCAGGCTCGAAACCAACCACTATTAAAGAAAAGAAAAGTAATACT	putative integrase	SAR0366	MRSA252	0	0	0	0	0.39	0.1827	0_tan	0.3822	0.61	0.49	0.58	0.5	1	0.08	0.15	0	0.55	0	0.2	0	0
ATGGTTTATGTGGTGATGAACAACAAGTTATTCGGTCATGTATATATTAAAGATTGTAAGGTGAGGAAGT	hypothetical protein	SAR0377	MRSA252	1	0	0	0	0.42	0.5286	0_tan	0.0001	0.78	0.83	0.7	0.96	1	0.39	0.88	0.6	0.62	0.8	0.9	0	0
ATGTAATAGGTTTAATTATGGCTATAAGTATGATTGCTGGGTCATATACTGGAGCACATTTTGCTATCAA	conserved hypothetical protein	SA1536	N315	0	0	0	0	0.06	0.5222	0_tan	0.1018	0.94	0.97	0.93	0.98	0.86	1	1	1	1	1	0.89	0	0
ATGTAATCGACTTTATCTTTGATAGAGATATAATAACCGTTTTCTTCCCAGAGAACGGAACTGAAACTGA	hypothetical phage protein	SAS0894	MSSA476	1	0	0	0	0.3	0.246	0_tan	0	0.09	0.16	0.01	0.35	0.16	0	0.33	0	0.13	0.14	0.36	0	0
ATGTAGACAAAAATGATTTAAAGAAAAAATCTGATATAGATAGTAGTAAGTTATTTAATTTAACAAGTTA	enterotoxin	SAR1917	MRSA252	1	1	0	0	0.34	0.0432	0_tan	1	0.95	0.84	0.89	0.9	1	1	0.94	0.25	0	0	1	0	0
ATGTATCATCCAGAAGTATGGCTTATTGATGGTAAAAGTAAGAAATTAACAACATATAAAGAAGCCATTG	putative siderophore biosynthesis protein	SAR0123	MRSA252	0	0	0	0	0.14	0.3049	0_tan	0.0249	0.76	0.82	0.73	0.86	1	0.5	0.92	0.64	0.54	0.75	1	0	0
ATGTATGGTTTAGTATATTGTTTTAAATTAGATGAATTTGAATTTAATTTAAAAAGTAAGTATAAAAAAT	hypothetical protein	SA2510	COL	0	0	0	0	0.42	0.0186	1_yellow	0	0.53	0.73	0.23	0.99	0.3	0.34	1	0.78	1	1	1	1	0
ATGTATGTGTTTTAAAGTATTGAAAACCCTTAAAATTGGTTGCACAGAAAAACCCCATCTGTTAAAGTTA	hypothetical protein	SAS002	N315	0	0	0	0	0.39	0.0981	0_tan	0.007	0.9	0.78	0.9	0.7	0.98	0.92	0.78	0.33	0.44	0	0.44	0	0
ATGTATTCGAAGGAAATATTTTTAAAGTAAATCCAGAAACTAAAGAAATTAAGCGGCCTTTTGTAAGCCA	conserved hypothetical protein	SAR2770	MRSA252	0	0	0	0	0.21	0.0977	0_tan	0.0001	0.86	0.94	0.81	0.99	1	0.69	1	0.92	0.7	0.86	1	0	0
ATGTATTTGAATATTTTAAACAAATTTCAAATAATAAACATTTTAAGTCTAATAAATTGTTATATAAACA	hypothetical protein, similar to UDP-glucose:polyglycerol phosphate glucosy	MW0919	MW2	0	0	0	0	0.33	0.4019	0_tan	0.1627	0.64	0.71	0.63	0.75	1	0.05	0.22	0.86	1	1	0.22	0	0
ATGTGGATTGATGTATTAAGTCAAAACGGAGATTATCAACCAACTGCAAAAGCGGTAGATGGATATATCA	hypothetical protein	SA0342	COL	1	0	0	0	0.43	0.0433	0_tan	0	0.15	0.3	0.02	0.66	0.18	0.07	0.62	0.56	0.1	0.2	0.44	0	0
ATGTGTCTGAAGATGGGAAGACTTATACATTCCATTTAAGAGATGATGTGAAATTCCATGATGGAACAAC	oligopeptide transporter putative substrate binding domain	SA2255	N315	0	0	0	0	0.28	0.4656	0_tan	0.1166	0.88	0.91	0.86	0.95	0.67	1	1	1	0.75	1	1	0	0
ATGTTAAAGTTGAAGTTAAATATAAAGGTAATAGTCAAAGGCCAACCGAATTTTCAGTTAGATATAATAT	hypothetical protein	MW0268	MW2	0	0	0	0	0.36	0.51	0_tan	1	0.64	0.58	0.61	0.61	0.18	1	0.72	0.86	0.33	0	0.67	0	0
ATGTTGACTCTATCACTGATGAGCAAAGTGCAATAAGACACTTTAGAGCTCAATCAAAAGTTTTTAAAGA	hypothetical phage protein	SAR1533	MRSA252	1	0	0	0	0.2	0.1156	0_tan	0	0.79	0.89	0.71	0.98	0.98	0.6	1	0.83	0.62	0.88	0.86	0	0
ATTAAAGAGATTAGGTTTAATGATTCCGTTACTAATTTTAATTTCTATTGTTGTATTTTCATTAGCTATC	probable oligopeptide transport system permease protein OppB	MW0876	MW2	0	0	0	0	0.44	0.4932	0_tan	0	0.5	0.56	0.32	0.79	0.48	0.14	0.96	1	0.25	0	0.73	0	0
ATTAAATACACTTATTGATAATGAACAAATGGAGTTAGGACACCAAACAAGCTTATTTGAATATATATGA	hypothetical protein	SA1790	N315	1	0	0	0	0.06	1	0_tan	1	0.99	0.99	0.99	0.99	0.97	1	1	1	1	1	1	0	0
ATTAAATCACTTAATGTTAAACAAGGTGACAAACTCGATAAAGGTGACAAAGTAGCAACTGTTACTGTAC	conserved hypothetical protein	SA2143	N315	0	0	0	0	0.06	0.27	0_tan	0.0142	0.95	0.98	0.94	1	0.88	1	1	1	1	1	1	0	0
ATTAAATCTAGTCAAGAGAGAAAAACTAACTGGGTTAAATGTGGTCTAGGAACAGTTGGAGGCGCTGGCA	putative membrane protein	SAR0385	MRSA252	0	0	0	0	0.14	1	0_tan	0.101	0.99	0.98	0.97	1	1	0.95	1	0.93	1	1	1	0	0
ATTAACAGGGGTTTAATATATGGATTACACAAATCAAAAAAGAAAATACATAATATTTGGTATGTTCTTG	truncated hypothetical protein	SAVP021	Mu50	0	0	0	0	0.46	1	0_tan	0.0169	0.6	0.59	0.51	0.73	0.83	0.4	0.71	0.43	0.14	0.2	0.5	0	0
ATTAATAAGTGTTGGAGTAGTGATTAAATATGCACCTGCAGCCACTAAGAAGAAGCCTATCCCAGCGAGG	accessory gene regulator B	MW1960	MW2	0	0	0	0	0.29	0.7743	0_tan	0.0002	0.93	0.91	0.85	1	1	0.62	1	1	1	1	1	0	0
ATTAATATTGGTGAATGGGATGGCGATGATGAAGATTTAGATAAGACGGTACAAGAGGTATCTAACGCTA	ORFID:SA1820~hypothetical protein, similar to bacteriophage terminase small	SA1820	N315	1	0	0	0	0.26	0.1863	0_tan	0	0.89	0.94	0.84	1	1	0.59	1	0.9	1	1	1	0	0
ATTAATCATAAGAGAGTACAGAGAATGATGCAGAAGCATCATTTGAACTGCCGAGTTAGACCTAAAAAGA	transposase	SA0063	N315	0	0	0	1	0.38	0.1044	0_tan	0.0001	0.93	0.84	0.96	0.73	0.95	0.94	0.9	0.5	0.86	0.29	0.86	0	0
ATTAATCCCTTTAAAGATTACAATAGTATTATCCGTTATTCTTGAAACACTGTACTATTATCCATACATT	hypothetical protein	MW2384	MW2	0	0	0	0	0.04	0.4739	0_tan	0.4913	0.99	1	1	0.99	1	1	1	1	1	0.91	1	0	0
ATTAATTCAATTTTATAATGAAAAAAATCCAGTCGTAGTTGAAGAAATGGAACAATTTATAAATAAAATT	ORFID:SA0041~xylose repressor homologue	SA0041	N315	0	0	0	1	0.38	0	3_red	0	0.84	0.5	0.87	0.11	0.96	0.85	0.11	0.13	0.33	0	0.11	1	0
ATTACTCTCTTGTAGAAGAAAGTGATATAAAATATAAAACATCTAAAAACTTTATCAATAAAGTATACAA	methicillin resistance regulatory protein	SA0040	N315	0	0	0	1	0.24	0.0513	0_tan	0.1252	0.91	0.81	0.9	0.81	0.95	0.92	0.82	0.8	0.7	0.56	0.62	0	0
ATTACTGACCCAACGTCAAAAGGCGTCTCAGATTCATCTATAGCACAGACATATCAAGCGCCTAGAGATA	hypothetical protein	SAV0912	Mu50	1	0	0	0	0.29	1	0_tan	0.5786	0.76	0.77	0.78	0.74	0.9	0.67	0.67	0.67	0.71	0.43	0.79	0	0
ATTACTTACTTTATATTTTGTTGGTTTTAGGTGCTCTGAGTACATTAAAATTATTTATTAAGCCTTTATG	membrane protein, putative	SA2064	COL	0	0	0	0	0.09	0.7115	0_tan	0.0054	0.96	0.97	0.93	1	0.89	0.98	1	1	1	1	1	0	0
ATTAGAAAAAGATTCAAAAGCTAAAGAGAGGCGTTGGAATAGTGGAGACATTAAGTTGCTTATAGCACAT	conserved hypothetical protein	SA0363	COL	1	0	0	0	0.32	0.3133	0_tan	0.0222	0.85	0.78	0.76	0.9	1	0.61	0.86	0.78	0.5	0.86	0.64	0	0
ATTAGAAAAAGGGACATCGTATCATAAGATTTTGATTAAAAACTTCAATTTATGGCAAGCGCAAAGAGAA	hypothetical protein	MW1908	MW2	1	0	0	0	0.28	0.0874	0_tan	0.0108	0.14	0.25	0.14	0.3	0.04	0.04	0.5	0.69	0.5	0	0.1	0	0
ATTAGAATTCAAACCTAAACTTACCAGCGTTTATGTGAAAGAATTTAATAACACTGGAATTTACAAATAT	conserved hypothetical protein	VRA0045	Michigan	0	0	0	0	0.35	0.1553	0_tan	0.0036	0.33	0.22	0.35	0.12	0.55	0.15	0.07	0.2	0.14	0	0	0	0
ATTAGAGGATACAAAGAAAGCTTTAGATGAGCAAGTGAAATCAGCTATTACTGAATTCCAAAAAGTACAA	iron-regulated heme-iron binding protein	SAS1063	MSSA476	0	0	0	0	0.1	0.6077	0_tan	0.1939	0.91	0.94	0.9	0.95	0.76	1	0.97	1	1	1	0.86	0	0
ATTAGCGATTATTTTATTTATCGCTACATACTTAAACATTTCAAAAAATCAAGGCAGATCACCATTTTTC	conserved hypothetical protein	SA0974	COL	0	0	0	0	0.26	0.7232	0_tan	0.4872	0.96	0.95	0.94	0.97	0.82	1	1	1	1	1	0.8	0	0
ATTAGCTAAAGCAATCGGAATTGTCGGTGGCGTAAACGCTTGCAGCAGTTTATTTGATGAACCTAAAGTA	AgrD protein	SAS066	N315	0	0	0	0	0.26	1	0_tan	0	0.86	0.85	0.75	0.98	0.59	1	0.92	0.63	0.57	1	1	0	0
ATTAGTACCTATTTTAAATCCTATTCTCCCAACACAAAAATTATCGGAGTTGAACCTTCAGGTGCTAGTA	threonine dehydratase biosynthetic	SAR2148	MRSA252	0	0	0	0	0.19	0.7181	0_tan	0.0056	0.8	0.82	0.73	0.89	1	0.48	0.96	0.62	0.54	0.75	1	0	0
ATTAGTATTACTAAAACATATTACAATCCAAATAATAACAAGAAGAAATTTCAGATACTTCCCCCTAAAA	truncated hypothetical protein, similar to integrase [Genomic island nu Sa	MW1951	MW2	1	0	0	0	0.29	0.0054	2_orange	0	0.38	0.6	0.22	0.85	0.35	0.19	0.68	1	1	0.2	0.79	1	0
ATTAGTCAAAAGTATGATGAAATAGCTCAAAACTTTGGAAAAATAGCGCAATTAAATTACTACAGTAGTG	hypothetical protein	SA0280	N315	0	0	0	0	0.26	0.0872	0_tan	0.0872	0.92	0.98	0.92	0.98	0.75	1	1	1	1	0.6	1	0	0
ATTAGTGACAGGGGTTATTGGAAGTCTTTTTGTGTATATTATATTGTTGCAAATGGCACAATTTTATTCA	ORFID:SA1654~hypothetical protein, similar to ABC transporter ecsB	SA1654	N315	0	0	0	0	0.16	0.2072	0_tan	0.0629	0.96	0.99	0.95	1	0.95	1	1	0.92	0.89	1	1	0	0
ATTATAAATTTTTAAAACAATATGGTGTGTCTAATACATTTATTTGTAAGATGTATCATATTTCAATTGA	hypothetical protein	SA1586	COL	0	0	0	0	0.27	1	0_tan	0.0006	0.74	0.72	0.61	0.85	0.97	0.29	0.75	0.7	0.93	0.5	0.64	0	0
ATTATACTAATAAGAGGAATAGTAAAAGCAATTCTAAGTAAAATTGCAGATAAGAGGTTTGTTAAAAGCA	conserved hypothetical protein	SA0030	COL	0	0	0	1	0.47	1	0_tan	0.0294	0.74	0.72	0.79	0.59	0.96	0.48	0.62	0.89	0.75	0.25	0.44	0	0
ATTATATAGTCACGGACATTTTTGTCCATAACCCACTAGGAGGTCGTCAGAATCAAACTGACCACGCACT	anti repressor	SA1801	N315	1	0	0	0	0.12	0.4439	0_tan	0.2473	0.83	0.87	0.82	0.88	0.97	0.77	0.84	0.73	0.65	0.57	1	0	0
ATTATATGAATTAAAACAATCCTTAGGTATGATTGGACAACAATTAAAAAATAAAAATGATGAATTGAGT	phage major capsid protein, putative	SA0370	COL	1	0	0	0	0.29	0.1741	0_tan	0.0277	0.85	0.76	0.86	0.71	1	0.67	0.6	0.63	0.77	0.67	0.67	0	0
ATTATATTACTGAGTATCTTAATTTTTATTTATTCTCAATTTACTCTTAAAGAAATGAAATATAAACGTA	AgrC	MW1962	MW2	0	0	0	0	0.33	0.4283	0_tan	0.0798	0.59	0.52	0.61	0.47	1	0.09	0.19	0.79	0	0	0.17	0	0
ATTATATTCGAAGCCTTAAATATGACGGGATAATGTATGAGAGCATATTACAAGATGGTACTTTTAACTT	hypothetical protein	SA0183	COL	0	0	0	0	0.21	0.0085	1_yellow	0	0.36	0.56	0.18	0.85	0.2	0.16	0.88	0.53	0.95	1	0.57	1	0
ATTATCGAATATATATTGGTGCCCAATGTCGTAGAATCCAAGTTTGTCATAATGGTAAGTATCATTATTA	hypothetical protein	SA0290	COL	0	0	0	0	0.36	0.0012	3_red	0	0.35	0.62	0.17	0.95	0.14	0.07	0.96	0.63	0.88	0.86	1	1	0
ATTATGAAAAGTCTCTAATAGAGGAAGCGAAAGAAAAAGCAAATCAGAAGATTAAAGCTGCAACAAAAGA	MutS-like protein	SA0991	N315	0	0	0	0	0.03	0.0765	0_tan	0.0002	0.92	0.97	0.89	1	0.82	0.98	1	1	1	1	1	0	0
ATTATGTGTGTTCCTATGACAGTTGCTTTATGTACAATATTCCTTAAATTTATCTCAATTTTTATTCTTC	membrane protein, putative	VRA0059	Michigan	0	0	0	0	0.4	0.7382	0_tan	0.0736	0.53	0.56	0.49	0.66	0.74	0.38	0.67	0.56	0.25	0.33	0.5	0	0
ATTATTAAACCATGTGTCGCCACCTATTAAAGATATGATTGAGCGTTTTGTGCATGAACATGACGTCATT	hypothetical protein, similar to formiminoglutamase	MW2254	MW2	0	0	0	0	0.5	0.2252	0_tan	0	0.77	0.87	0.63	1	0.67	0.68	0.94	1	0.86	1	1	0	0
ATTATTACGAGTTCTTAGTGAGATATAACAAAATAGATACATTATTGACGGAAAATGAATCTAAAAATCT	putative helicase	SAS2376	MSSA476	0	0	0	0	0.4	0.0247	0_tan	0	0.27	0.46	0.23	0.59	0.11	0.05	0.63	0.86	1	0	0.67	0	0
ATTATTGCTGATAAGTATTCAGTTAAAGTTAAAAACCCACAAACAGTGGATCAAATCAATTATTTCCAAG	ORFID:SA0638~bacitracin resistance protein (putative undecaprenol kinase) h	SA0638	N315	0	0	0	0	0.13	0.2492	0_tan	0.0014	0.92	0.96	0.89	1	0.78	1	1	1	1	1	1	0	0
ATTATTGTAGTCATCATATTTGTGGTACAAAGTGTTACAGAAGGTGCTTATCAATACATCGTTGCTGCAA	lysine-specific permease	SAR1761	MRSA252	0	0	0	0	0.21	0.6398	0_tan	1	0.71	0.67	0.69	0.69	1	0.48	0.71	0.42	0.43	0.43	0.46	0	0
ATTATTGTGAACATGAAGTACTTAGCTCGATTATCAATGGCGCATATATTATAGTCAAAACCTCACCAGG	arginine repressor family protein	SAR2715	MRSA252	0	0	0	0	0.27	0.2691	0_tan	0.0062	0.84	0.9	0.8	0.95	1	0.6	1	0.88	0.73	0.67	1	0	0
ATTATTTTACTATACAAGCGTGATAAAAAAGTATAATATTTCGAGATCAGGATTTATGAATTCAGTATAT	hypothetical protein	MW0272	MW2	0	0	0	0	0.42	0.4867	0_tan	0.0191	0.13	0.19	0.11	0.28	0.09	0.07	0.13	0.85	0	0	0.27	0	0
ATTCAACAATCAGTCAACTAGGAATGATTATGGCAATGGTCGGTATCGGTGGTGGATATGCTCAACACCA	hypothetical protein	SAV0621	Mu50	0	0	0	0	0.19	0.2716	0_tan	0.0174	0.95	0.98	0.93	1	0.91	1	1	1	0.71	1	1	0	0
ATTCAAGAAGCAACGAAGCTAGCGATGGAGAAAGGAATAAGTATAAGGAGAGAGAATCAAGATGTGTATG	hypothetical protein	SA1803	N315	1	0	0	0	0.16	0.2853	0_tan	0.0023	0.85	0.9	0.8	0.95	0.99	0.71	0.96	0.64	0.8	0.75	1	0	0
ATTCATTAGAATTTTCATCACCTATTGAAAGAAATCATCGGTTTTTATTTCATCATCTATCAACACATCA	hypothetical protein	SAV2014	Mu50	1	0	0	0	0.28	0.6256	0_tan	0.001	0.65	0.69	0.56	0.8	0.97	0.19	0.76	0.5	0.82	0.33	0.73	0	0
ATTCCAAAGGCAATTAACAGTGTACCCATTAGAATTTTAATATTTTACGTTGGTGCGTTAGCGGTTATCA	D-serine/D-alanine/glycine TRANSPORTER	SA1519	N315	0	0	0	0	0.05	0.2405	0_tan	0.1354	0.93	0.97	0.92	0.97	0.85	0.98	1	1	1	1	0.88	0	0
ATTCGATAAGATTTATAACATACTAAACATCGAAGCAATACCGTCTAACGTACTACTAAAAAACTTGAGT	ABC transporter, ATP-binding protein	SA2537	COL	0	0	0	0	0.12	0.1769	0_tan	0	0.91	0.96	0.86	1	0.7	0.98	1	1	1	1	1	0	0
ATTCGGAGTAAAGGAGACAACTGAAAGAAGTAATAGCTATAAGGCCACAGGGCTCACTACCCAAAGCATC	integrase, degenerate	SA0441	COL	0	0	0	0	0.26	0.0301	0_tan	0	0.52	0.69	0.29	0.95	0.42	0.24	0.96	0.62	1	0.8	1	0	0
ATTCGTCAAACATTAATAAAGAATAAAAAGTTATATAACGGAGAATTTAATAAAGGTCAAATTAAGATAA	ORFID:SA1011~hypothetical protein, similar to exotoxin 3	SA1011	N315	1	1	0	0	0.2	0.7013	0_tan	0.0033	0.95	0.97	0.92	1	0.73	1	1	1	1	1	1	0	0
ATTCTGAACGCTTTATTATATCAGAAGAAAAATCAGAGACTGGGGAACTTATATTTAAATTTTATAGACA	ORFID:SA0089~hypothetical protein, similar to DNA helicase	SA0089	N315	0	0	0	0	0.08	0.1654	0_tan	0	0.96	0.91	1	0.86	1	1	0.8	0.86	1	1	0.56	0	0
ATTGAAAAACAGTGATTTGATGATGGAGCATACCAATAAAGCTGGAGCAAGTAATATTGTTAAGAATCCA	terminase small subunit	SAS0931	MSSA476	1	0	0	0	0.36	0.0328	0_tan	0	0.32	0.5	0.1	0.87	0.31	0.21	0.88	0.75	0.3	0.57	0.67	0	0
ATTGAAAAGATTGGACAGTTAATTGGACGAATTACAGGTGGGGAACCTAGCGATACAAAAAAGTTCGTGA	hypothetical protein	MW1897	MW2	1	0	0	0	0.49	0.1117	0_tan	0	0.61	0.76	0.43	0.94	0.54	0.39	1	1	0.73	0.33	1	0	0
ATTGAAAGAAGCTGGGATTGTCCTAACAGACTTCCAAAAAGGTAATGAAAAGGCTCGCGAACGTATGAAA	putative NAD synthetase	SAR2005	MRSA252	0	0	0	0	0.4	0.852	0_tan	0.7108	0.29	0.27	0.29	0.26	0.97	0	0.09	0	0	0	1	0	0
ATTGAACTTGATGAAGCAGTAGGAATTATGGCAGGTCAAGTTATCTATAAATATGAGGAGGAACAAGGAA	hypothetical protein	SA1785	N315	1	0	0	0	0.16	0.3687	0_tan	0.3853	0.99	0.96	0.96	0.99	0.99	1	0.96	0.91	0.91	0.89	1	0	0
ATTGAATATAAAAATGTGACAGGTTATATCAGTTTCATTCAACCAAGTATTAAATTTATGAATATCATAG	exotoxin 1, putative	SA0469	COL	1	1	0	0	0.33	0.1203	0_tan	0.0006	0.8	0.9	0.77	0.96	0.08	1	1	1	1	1	0.33	0	0
ATTGAATTGATTGAACCTTTGGACGTAGTAGATTTCCATAATTTTGCTAAAAAATCTTATTTTATTTTGA	UDP-N-acetylglucosamine 2-epimerase	SA2103	COL	0	0	0	0	0.07	0.5631	0_tan	0.1351	0.94	0.96	0.92	0.97	0.83	0.98	1	1	1	1	0.94	0	0
ATTGACTTCTTAGCGGTAATGGGATTTGCTTCGGCAATTAGTGTTGTTTTTGCAGTACTTAGCGCTTTAA	MmpL efflux pump, putative	SA2566	COL	0	0	0	0	0.57	1	0_tan	0.0216	0.89	0.9	0.83	0.98	0.94	0.76	0.83	0.67	1	1	1	0	0
ATTGATGCTGTAAACAAAACTGCAGAAAAAGCTGTAGATAGTGTTGGTAATGCCATTGGTGATGCCACAA	conserved hypothetical protein	SA0553	N315	0	0	0	0	0.26	0.0634	0_tan	0	0.34	0.21	0.48	0.07	0.04	0.98	0.08	0	0	0	0.05	0	0
ATTGCTTTAATTCAAAAAGCAGCTAATATTGTTGATGAAACATATGAATATATTTTAACTGTTGTAAAAG	proline dipeptidase	SA1588	COL	0	0	0	0	0.04	0.1016	0_tan	0.0131	0.95	0.99	0.95	1	0.9	1	1	1	1	1	1	0	0
ATTGCTTTTTTCTAAAGGTGTTATCTTAGTTGAAGGAGATGCTGAAGAAATACTTATTCCTCAAATAGTA	hypothetical protein	SAV0414	Mu50	0	0	0	0	0.21	1	0_tan	0.4862	0.05	0.04	0.06	0.03	0	0	0	0	0.54	0	0.15	0	0
ATTGGAACAGCATTACCACTTGCAGGTACTGTAGCTACAGGGGCAATTCATTTTACAGCCAATGAAGTTA	conserved hypotehtical protein	SA2242	N315	0	0	0	0	0.13	0.4904	0_tan	1	0.99	1	0.99	1	0.98	1	1	1	1	1	1	0	0
ATTGTACTTTTTGGGAAAGTGATTGTTGATTGTCCTATTTGGTTGAATCCTGTTGATTATTTGGTTAAAA	hypothetical protein	SAR1126	MRSA252	1	0	0	0	0.42	0.3065	0_tan	0.0013	0.85	0.91	0.79	0.97	1	0.46	1	1	0.88	0.67	1	0	0
ATTGTAGCCATTTTTATTGTTTTGGATGATAAACTCTTTTTGGAATTTTTAGTTTTTATAATTTGCAACT	hypothetical protein	SA0848	COL	0	0	0	0	0.32	0.7131	0_tan	0.5816	0.78	0.75	0.75	0.79	0.44	0.98	0.69	0.7	1	0.14	0.71	0	0
ATTGTGTTGTATGGGGAAAACAAGCAGAAAGTTTAGTTGATTATCAAAGTAAAGGTAATCTAATTATTAT	traM protein	VRA0020	Michigan	0	0	0	0	0.36	0.8669	0_tan	0.0004	0.64	0.61	0.5	0.79	0.79	0.44	0.77	0.62	0.5	0.33	0.64	0	0
ATTGTTATTTACCTAATTTATAGTCTAATTGTCTATTTCATCTGCATTATAAATTTTTTCATAATGGCTG	putative membrane protein	SAR2034	MRSA252	0	0	0	0	0.16	1	0_tan	0.4627	0.99	1	0.99	1	0.98	1	1	1	1	1	1	0	0
ATTGTTGTATCATTAATTTTTATTACACAACAAACAGATGGTTTATCATCAATATCAGACTTTTATTTAA	Na1/H1 antiporter, MnhA component, putative	SA0679	COL	0	0	0	0	0.16	0.4817	0_tan	0.0091	0.88	0.92	0.84	0.95	0.58	0.98	1	1	1	1	0.8	0	0
ATTGTTTGATCCATCAAATTTTGAAGAAGCTAAAGTGGCTTTAATTGAAAAAGAATTAGTAACAGAGAAT	hypothetical protein	SA0279	N315	0	0	0	0	0.21	0.5413	0_tan	0	0.83	0.87	0.74	0.97	0.37	1	1	1	0.95	0.5	1	0	0
ATTTAAAAATTATGAGCAGATAGATCCAACTATAGAAATCGAAAATGGAAATACAAAATTAAAATTAAAT	hypothetical protein	MW0918	MW2	0	0	0	0	0.21	0.2546	0_tan	0	0.85	0.91	0.75	0.99	1	0.4	0.9	1	1	1	0.92	0	0
ATTTAATATTACTAATGTACTTTTAAATTTAAGGGTTTTTAAAAATAGAACATTTGCATTATGTACGATT	ORFID:SA1970~hypothetical protein, similar to multidrug resistance protein	SA1970	N315	0	0	0	0	0.04	0.4609	0_tan	0.487	0.99	1	0.99	1	0.98	1	1	1	1	1	1	0	0
ATTTAATTGGTAGTCATTTAGATAAAGAAATCGAAGATTGTGCTCAAATTAGAAAACAGACCCGTAAAAA	IS1272-related, transposase, degenerate	SA1813	COL	0	0	0	0	0.04	1	0_tan	1	1	0.99	0.99	1	1	1	1	0.92	1	1	1	0	0
ATTTACAAAACAACTCAAGAATTAAGTTTTGTAAGTTCGTTAGATTTTTATTTAACGAAACATTTAACTT	hypothetical protein	SA2629	COL	0	0	0	0	0.1	0.4815	0_tan	1	0.99	1	0.99	1	0.98	1	1	1	1	1	1	0	0
ATTTACATTACTTAGTATTTTAATTGTGATTTTTATTTTTCAGTTTGCATATTCTAAACTATTTAATACG	hypothetical protein	SA2013	COL	0	0	0	0	0.28	0.0678	0_tan	0.0088	0.16	0.29	0.16	0.34	0.08	0.02	0.07	0.86	1	0	0.15	0	0
ATTTACTGGAGATTGGCGAGGAGTTTGGGATGCGATTGTTATGATTCTTAAAGGAGTCGTTCAATTAATA	phi PVL ORF 15 and 16 homologue	SAV1955	Mu50	1	1	0	0	0.42	0.2355	0_tan	0	0.7	0.8	0.57	0.94	0.71	0.59	0.93	0.75	0.64	1	1	0	0
ATTTAGAAGGATCTAGAATACACAACGCATTTGTAAACAGAAATTACACAGTTAAATATGAAGTGAACTG	Panton-Valentine leukocidin chain S precursor	MW1379	MW2	1	1	0	0	0.41	0.0255	0_tan	0.1665	0.03	0.13	0.06	0.13	0.02	0	0.22	0.71	0.17	0	0.1	0	0
ATTTAGATATAAATTATTCTGCTAAAGGTACTACAATTGTATTATTTAGTGGAGAATTAGACAAAGCTGT	conserved hypothetical protein	SA0063	COL	0	0	0	0	0.3	0.3267	0_tan	0.188	0.71	0.64	0.72	0.62	0.03	0.98	0.57	1	0.95	0	0.14	0	0
ATTTAGTAATAAAAGAACTATTAATGAAAATGAATATCCTGTTTTAACATCGTCAAGACAAGGTTTAATA	probable specificity determinant HsdS	SA1625	N315	1	0	0	0	0.41	1	0_tan	0.8531	0.62	0.62	0.63	0.6	0.3	0.98	0.64	0.17	0.13	0.13	0.25	0	0
ATTTAGTAATATTACCTATGGCGATTTTCAAGGTATTGAATTAATTATTGAAAACGTTCTCAATTACATG	hypothetical protein	SA0819	COL	0	0	0	0	0.38	0.1489	0_tan	0.0002	0.8	0.9	0.73	0.95	0.52	0.94	1	1	1	1	0.67	0	0
ATTTATAAAAATCCTAAATATCGAGTTATTAGATATAATAATGAATATTTCATGGTCGATTTAGTAAGTA	conserved hypothetical protein	SA0650	COL	0	0	0	0	0.31	0.0073	1_yellow	0	0.34	0.56	0.22	0.82	0.09	0.03	0.94	1	1	1	0.22	1	0
ATTTATATGAAATCATTCAATATAGACAAAGTATTGACTACATATATATTTTATTATGATTGTGAAAAAG	hypothetical protein	MW2309	MW2	0	0	0	0	0.58	0.0571	0_tan	0	0.52	0.72	0.08	1	0.22	0.43	1	1	0.5	1	1	0	0
ATTTATCTTCGCTATTGGAGCGACAGACATAACAGATGTAATTACAAATACTGTTGGAGGCTTTCTTGGA	vanZ protein	VRA0043	Michigan	0	0	0	0	0.4	0.1929	0_tan	0	0.04	0.1	0	0.29	0.1	0	0.22	0.11	0	0	0.22	0	0
ATTTATTAACACAAATTACTTTAAAACATGAGAATATGGAAGGAGGATCTTTAGTACTACAGTTCTATAT	intercellular adhesion protein C	SAR2750	MRSA252	0	0	0	0	0.4	0.7465	0_tan	0.3156	0.94	0.92	0.91	0.96	1	0.79	1	1	1	1	0.63	0	0
ATTTATTAAGTTTAAAAAATTAATGAATTTTGCATTTAAAGGGAGATATTATAGTGAAAAACAATCTTAG	hypothetical protein	SA2512	COL	0	0	0	0	0.46	1	0_tan	0.3923	1	0.99	0.98	1	1	0.94	1	1	1	1	1	0	0
ATTTATTCAGATCTATCCCTTCACTTGAAATTGATCATGCGTCAGTATTAGATGAATTCTATTGGTTAAA	putative myosin-crossreactive antigen	SAR0111	MRSA252	0	0	0	0	0.15	0.2897	0_tan	0.0173	0.85	0.9	0.82	0.94	1	0.67	0.96	0.92	0.64	0.78	1	0	0
ATTTATTTAATAATCCAGGTGAACTATTAAAATATAACGTTATAAATATCAAGGTTTTAGATTTAGAGGT	hypothetical protein	MW1424	MW2	1	0	0	0	0.34	0.1044	0_tan	0.8545	0.8	0.68	0.75	0.73	0.95	0.49	0.53	0.67	0.8	0.6	0.82	0	0
ATTTCAAGATAATGCATTAGTATCGCCGTATCCTGGTGCTAAAGAAATGATATTAATTCCAGACTTTGCC	hypothetical protein	SAR0101	MRSA252	0	0	0	0	0.21	0.0338	0_tan	0.0052	0.9	0.98	0.89	0.99	1	0.79	1	1	0.8	0.86	1	0	0
ATTTCCTACCAAAGAAAACATAAGGAGTTTGGACATCTTGAAGGAGATACTATTGTTGGTCGTCGTCATG	integrase/recombinase, core domain family	SA2727	COL	0	0	0	0	0.1	0.3902	0_tan	0.0001	0.92	0.96	0.88	1	1	0.74	1	0.93	1	1	1	0	0
ATTTCGGATTAATTATAGTCCCATTATTAACAACAAATGATGCGGATTTTGTATGGACTTCTTCATCATT	putative membrane protein	SAS1095	MSSA476	0	0	0	0	0.18	1	0_tan	0.0408	0.91	0.92	0.87	0.95	0.62	1	1	1	1	1	0.73	0	0
ATTTCTGCATGGATTTCTTAGCGACAGCCGTACTTATCATAATCACATCGAAAAATTTACTGATAACTAT	hydrolase, alpha/beta hydrolase fold family	SA1053	COL	0	0	0	0	0.08	0.6021	0_tan	0.2473	0.98	0.99	0.97	1	1	0.96	1	0.94	1	1	1	0	0
ATTTGAAGGGATTAGGTGGAGAACACAACGATTACGAAAAAATTACATATAGCACTTCTTCTAATAATGT	putative exported protein	SAR0846	MRSA252	0	0	0	0	0.32	0.3672	0_tan	0.0657	0.79	0.72	0.7	0.83	1	0.45	0.75	0.57	0.58	0.43	0.75	0	0
ATTTGCAATAGGTAATGCAATCAAATATCTATCTAGAGCACCGTTGAAAAACGGACACGAGGATTTAGCA	hypothetical protein	SA1787	N315	1	0	0	0	0.36	0.0903	0_tan	0.697	0.82	0.7	0.75	0.78	0.69	0.86	0.85	0.57	0.5	0.63	0.8	0	0
ATTTGCTATATTATGGTAGTTATATTATATTTGGCTACTTTATCGTATTTGCAGTTGAACATTTGATGGA	putative membrane protein	SAR2259	MRSA252	0	0	0	0	0.26	0.5948	0_tan	0.0001	0.76	0.79	0.66	0.91	1	0.36	0.94	0.44	0.64	0.57	1	0	0
ATTTGGTGAAATCAAAAATAAAATTATCAGCTTTAACGGGTTCGAATTTAAAGTGTCTGCGATGAAGAAA	hypothetical protein	SAV1988	Mu50	1	0	0	0	0.42	0.0103	1_yellow	0	0.21	0.43	0.13	0.78	0.15	0.14	0.5	0.57	0.77	0.6	0.75	1	0
ATTTGTAAAACTGGATACTCTAATATCCGGTAATAGCCGGTTAAATCGACATAGGATGTCACTAGCTATT	replication initiation protein, degenerate	SA0132	COL	0	0	0	0	0.28	0.0327	0_tan	0	0.23	0.38	0.15	0.58	0.13	0.04	0.8	0.86	0.89	0	0.25	0	0
ATTTGTTAAAAGATGGTAAATTTACAAAAGTATATGTCAATCAAGATAGTGTATCTTTTGTGCCAGGGTA	hypothetical protein	SA1341	COL	0	0	0	0	0.28	0.1293	0_tan	0	0.85	0.93	0.75	0.99	1	0.29	0.96	1	1	1	1	0	0
ATTTTACAAGTGAAGGTAAATTAAAAGTTTCACTTGATTATATTGATTGGATAAATACAGAGTTTGATCA	conserved hypothetical protein	SA0287	N315	0	0	0	0	0.3	0.8238	0_tan	0.0028	0.87	0.85	0.78	0.95	0.47	0.98	0.95	0.93	0.85	1	0.91	0	0
ATTTTAGAAGGAAGAGTTAGAGATATTAGAGATAGACAATCAATTTACTTTACTGACCCTGATGGTCATA	fosfomycin resistance protein fofB	SA2124	N315	0	0	0	0	0.12	1	0_tan	0.2614	0.97	0.96	0.98	0.95	1	1	1	0.71	1	1	0.62	0	0
ATTTTCCTAATAATGATGAAAATATTAAGCCTGGTATTATTCAAATGGATATAGATAGTCTTGAAGTTAT	hypothetical protein	SA1340	COL	0	0	0	0	0.29	0.4878	0_tan	0	0.71	0.76	0.57	0.93	1	0.18	0.88	0.64	1	0.67	0.67	0	0
ATTTTGATAAAGAGGGATTAACTGAAGAAGAGATTGAAGAAGTAAATAGATTCATTGAATGGGTTAGAAA	hypothetical protein	SAV0851	Mu50	1	0	0	0	0.4	0.0877	0_tan	0	0.34	0.49	0.2	0.78	0.31	0.28	0.67	0.75	0.71	0.57	0.5	0	0
ATTTTTAAAAACTAAACTTGAGTGTTCAGATATGTACGCTCAGAAACTCATAGACGAGACACAAGGCAAT	hypothetical protein	SAV0870	Mu50	1	0	0	0	0.28	0.4667	0_tan	0	0.75	0.8	0.63	0.97	0.65	0.84	1	0.7	0.75	0.67	0.92	0	0
ATTTTTAATAAAGTGCATGAGTTATTTAATAAAGTGACGTTTATAGATAGAATTTATAACATAATAATAG	hypothetical protein	SA1237	COL	0	0	0	0	0.6	1	0_tan	0	0.8	0.8	0.42	0.98	0.52	0.55	1	1	1	1	0.88	0	0
CAAAAAAGCAAATAGAGGCATTAGTCTATAATTTTTATGAAGTCAATAATATCAATTTAAGTTCTGGTTT	hypothetical protein	SAS1724	MSSA476	0	0	0	0	0.18	0.0011	3_red	0	0.4	0.64	0.21	0.89	0.22	0.13	0.9	1	1	1	0.64	1	0
CAAAAACGTTAGACATGTATCCTACTGAAAATCTAGAAGACTTTTATGACAAAGAGGGATATCGAGATGG	hypothetical protein	MW0400	MW2	1	0	0	0	0.39	0.0467	0_tan	0	0.46	0.63	0.27	0.89	0.28	0.19	0.96	1	0.5	1	0.64	0	0
CAAAAAGACGAAGATAAAAGTGAAAATATGCCTGAAGAAAAATCAGAATCAGAAACAGATAAGGATTTAC	putative lipoprotein	SAR1879	MRSA252	0	0	0	0	0.22	1	0_tan	0.0038	0.9	0.89	0.82	0.96	1	0.67	1	0.88	0.67	0.71	1	0	0
CAAAAATCGAATCATCAGAATATAGAGAGAGCTTAGATAGTTTTAATGAAATTTTAATGAAATATCTAGA	hypothetical protein	SA2202	COL	1	0	0	0	0.36	0.5654	0_tan	0	0.2	0.24	0.1	0.46	0.08	0.02	0.46	0.13	1	0	0.25	0	0
CAAAACCAAACAAATAATAACCAATCAAGTAATAACCAAGCGAATAATAATCAAAAATCAAGTTACGTTG	conserved hypothetical protein	SA2365	COL	0	0	0	0	0.26	0.0297	0_tan	0	0.79	0.91	0.65	1	0.5	0.9	1	1	1	1	1	0	0
CAAAACGATACGAATTAACGGATGCAGATTGGGAAGCGATTGATGAATTAGTTGATAAAAAGTATAAAAA	hypothetical protein, similar to lipoate-protein ligase	MW0304	MW2	0	0	0	0	0.05	0.217	0_tan	0.2423	0.98	1	0.98	1	0.97	1	1	1	1	1	1	0	0
CAAAAGAATTGATGATTACAAAAGGGCATATCTACTATCAATCTCGAAAGCTAGATAGAGTCCCTCGTGA	hypothetical protein	SAV0393	Mu50	0	0	0	0	0.42	1	0_tan	0.4716	0.07	0.06	0.07	0.03	0.02	0.02	0	0	0.54	0	0	0	0
CAAAAGTTGGTAGTCAAGAAAGGGCTGTTTTAATTGAATGGGTAGGTCCTATGAATCGCAAAAACATTAT	conserved hypothetical protein	SA0373	COL	1	0	0	0	0.18	0.4992	0_tan	0.0654	0.91	0.87	0.85	0.94	1	0.76	0.9	0.85	0.92	0.78	0.87	0	0
CAAAATACGAGTTAAATAATACTAAAAAGGTCGCAAATGCATTTGGTTTAAATGAAGCAGATACAAATCT	hypothetical protein	SA1823	N315	1	0	0	0	0.23	0.7009	0_tan	0	0.8	0.84	0.67	0.98	1	0.38	0.92	0.75	1	0.71	1	0	0
CAAAATAGATCACAATTCAGAGGACGACTTATTAGAAATATATTACTCTTGGGCATTCCATGAAATAGCT	hypothetical protein	MW1902	MW2	1	0	0	0	0.28	0.2236	0_tan	0	0.41	0.51	0.25	0.75	0.31	0.26	0.88	0.86	0.57	0.5	0.58	0	0
CAAACAAGCATCACCAATGGCAGATGATTATGTTAATGTCTTAAAATTGAATATCACTTTAGATAAACTC	potassium-transporting ATPase C chain homologue	SAV0074	Mu50	0	0	0	1	0.3	0.0174	1_yellow	0	0.88	0.73	0.96	0.56	0.9	0.96	0.79	0.43	0.5	0.14	0.5	1	0
CAAACCATCTCGAAACAAATTGTGTCTTTTTACATTGCGATTACATTCTTAAAGTTCCAATTAACAAACT	conserved hypothetical protein	SA1828	COL	0	0	0	0	0.15	0.8097	0_tan	0.0065	0.9	0.91	0.84	0.96	0.62	0.98	1	1	1	1	0.8	0	0
CAAACCGTTTTAAGATTATTAGAATGGGTGCAGACATAAGAATTAAATGTGAAAATTGTCAAAGAAGTAT	conserved hypothetical protein	SA0434	COL	0	0	0	0	0.26	0.0075	1_yellow	0	0.75	0.91	0.6	1	0.67	0.59	1	1	1	1	1	1	0
CAAACTATTATAATCAATGCTATTTTTCATTGGATAATATGGAATTAAATGATGGTAGATTAATTGAAAA	enterotoxin Yent1	SA1645	N315	1	1	0	0	0.4	0.5799	0_tan	0.0634	0.74	0.69	0.65	0.8	0.56	1	0.89	0	0	0	1	0	0
CAAACTCATCAACCCACATATTACCGCAGAAGGTTATAAAATTGGCAATCGAGGATTTACCAATTACATT	hypothetical protein	SAV0412	Mu50	0	0	0	0	0.4	0.0789	0_tan	0	0.27	0.42	0.12	0.76	0.28	0.17	0.69	0.38	0.62	0.33	0.67	0	0
CAAAGTTGATTTTTGTTTATATTGAGGATTGCGTTATGGCTCTTTACACTAAAGATAGTCACATACATTA	hypothetical protein	SAR2243	MRSA252	0	0	0	0	0.3	0.209	0_tan	0.0002	0.72	0.81	0.66	0.92	1	0.48	0.82	0.63	0.57	0.71	0.73	0	0
CAAATAAGAAAGTATTAAAAATTAATGCCTATACAGGAACAGACATGGCTAAACTTGATTTAAATAGTCT	hypothetical protein	SA1882	COL	1	0	0	0	0.22	0.3898	0_tan	0.0021	0.84	0.89	0.79	0.95	0.38	1	1	1	1	1	0.64	0	0
CAAATATTAATTATAAGTGTAAAGAGAAATTAGGAACTGGTTTAGAATTTAAATCGATGATTAGCTTACT	hypothetical protein	MW0757	MW2	1	0	0	0	0.33	0.0052	2_orange	0	0.14	0.34	0.03	0.69	0.15	0.08	0.75	0.56	0	0.38	0.55	1	0
CAAATGCGTCACGGGAAAATCATCCTGCGCAAATCAAAACTTACCACATTTTTAAGTTGGCTAACTTTAT	putative exported protein	SAR2531	MRSA252	0	0	0	0	0.13	0.4801	0_tan	0.0198	0.79	0.83	0.75	0.89	1	0.6	0.92	0.67	0.53	0.64	1	0	0
CAACAAATTGAATTAATTAAACGCTTAGTATCGTACGTCCCAAAAATAGAGCTTCATATGTATGGTTTTG	hypothetical protein, similar to poly (glycerol-phosphate) alpha-glucosyltr	MW0520	MW2	0	0	0	0	0.11	0.8143	0_tan	0.1668	0.9	0.91	0.88	0.93	0.67	0.98	1	1	1	1	0.83	0	0
CAACAACAAACTAAGGGTCGCTATTCTATAGTGATATTTGATATCTACGGTACTTTAACTTTAGATAACG	anthranilate synthase component I	SAR1380	MRSA252	0	0	0	0	0.23	0.8615	0_tan	0.0083	0.76	0.78	0.69	0.86	1	0.28	0.92	0.6	0.57	0.67	1	0	0
CAACAATTAGATGGTTACATTTCTATAGAAGATTTTTTTAAGCATATGGATGAATTATCGAAGAAAGAAG	hypothetical protein	MW1200	MW2	0	0	0	0	0.28	0.0079	1_yellow	0	0.46	0.67	0.2	0.95	0.35	0.15	0.89	1	0.43	1	1	1	0
CAACACGTGTAAATAATGTTGCAGCGATTAACTCAATGCAACCTTCTGAAGAATTGAAACAAGCAATTTT	putative mannitol-1-phosphate 5-dehydrogenase	SAR2247	MRSA252	0	0	0	0	0.39	0.5178	0_tan	0.0185	0.81	0.85	0.77	0.94	1	0.59	0.86	0.83	0.63	0.8	0.71	0	0
CAACTCAAAATAAGGGGGAAGCTCTGAAAGTTAAAGGTATGGTCTTGTATATGAATAGAAATACCAAAAC	Staphylococcus tandem lipoprotein	SA0082	COL	0	0	0	0	0.41	0.0433	0_tan	0.0001	0.83	0.94	0.74	0.97	0.75	0.75	1	1	1	0.89	1	0	0
CAACTGGTGATTTTGCTGGGTTTATTGCGGCGACACTTTTACGAGGCGTTCACTTTATACAAGTGCCAAC	3-dehydroquinate synthase	SA1505	COL	0	0	0	0	0.45	0.0908	0_tan	0	0.24	0.39	0.18	0.68	0.13	0.14	0.5	0.5	1	0	0.67	0	0
CAAGAAAAGAAGTGAATTACGCTGCAAATACAGATGCTGTTGCTACACTTTTTTCTACTAAGAAAAACTT	hypothetical protein	SA1533	COL	0	0	0	0	0.36	0.0148	1_yellow	0	0.33	0.53	0.21	0.9	0.17	0.14	0.85	0.38	1	0	1	1	0
CAAGCAGCAAACGCGACAACACCACCTTCGTCTAATGTAGACACATCACCACCACAATCGCCAACCACAA	exotoxin homolog [Genomic island nu Sa alpha2]	MW0385	MW2	1	1	0	0	0.26	0.3366	0_tan	0.0002	0.92	0.96	0.87	1	0.76	1	1	1	1	1	0.93	0	0
CAAGCGTTGTTCGATAAATCTGTTAAAATATTAGAAGATACATTTGATTCAATTAAATATTTATTAGAAG	L-lactate dehydrogenase	SA2395	N315	0	0	0	0	0.06	0.3569	0_tan	0.0003	0.93	0.97	0.9	1	0.84	0.98	1	1	0.95	1	1	0	0
CAAGTCGTATTATCGAAGAAGCATCTCAATACGATATATTAATTGCCTTACACAGTTTGAATAGTTTAAA	hypothetical protein	SAS0036	MSSA476	0	0	0	0	0.21	1	0_tan	1	0.01	0.01	0.01	0.01	0.02	0	0.05	0	0	0	0	0	0
CAAGTTATAGTATATGAATATATTCCACAAGATAAAATAGAAAAAGGGAAAGGCGAAATAACAGTAAATA	hypothetical protein	SAR1311	MRSA252	0	0	0	0	0.38	0.8612	0_tan	0	0.65	0.68	0.53	0.89	1	0.17	0.85	0.57	0	0.4	0.63	0	0
CAATAAAAATATTTGTGCGTTTTTATTGTTGGAAAATAAAATTTTAATCGCTATTGTTAATTTCTGTAAT	hypothetical protein	SA2604	COL	0	0	0	0	0.26	0.4659	0_tan	0.375	0.99	1	0.98	1	0.98	1	1	1	1	1	1	0	0
CAATAAAAGAAATTGAGGAAAGAACATTTCCAAATAATGAAGAAGAGTTTAATGCAATATTAACTCTATC	hypothetical protein	SAR1327	MRSA252	0	0	0	0	0.23	0.1386	0_tan	0	0.82	0.9	0.71	0.99	1	0.41	1	0.82	0.75	0.75	1	0	0
CAATACTTATGTTTGAAAAGTGTTGAATTAGGTGTGGTTATTGTGATGATTTATTGTTTGAAAGTTGATG	hypothetical protein	SA0642	COL	0	0	0	0	0.21	0.2231	0_tan	0.1424	0.98	1	0.97	1	0.96	1	1	1	1	1	1	0	0
CAATCAAATGCTAGTCCTAATGTCATAGGATACACTCGACGCGATAGTGAGTACTGGCGCGAGCTATGCT	hypothetical protein	SA1829	N315	1	0	0	0	0.33	1	0_tan	0.0253	0.75	0.75	0.68	0.85	1	0.44	0.79	0.5	0.57	0.6	0.73	0	0
CAATCAGTTAATTAATCATGGCCATACATTTAAGAGTGATTTTAAAAATGTAGCTAAAGGTGATTGGGTT	hypothetical protein	MW0076	MW2	0	0	0	0	0.27	0.0115	1_yellow	0	0.27	0.46	0.1	0.78	0.22	0.06	0.91	1	0.11	0.43	0.45	1	0
CAATCTTGATGAAAAACAAATGGCCGTTTTTAATTGCTTTACCATTTATGAATTGTTACGGCATTGGTGT	ORFID:SA2296~hypothetical protein, similar to transcriptional regulator, Me	SA2296	N315	0	0	0	0	0.06	1	0_tan	0.103	0.99	0.98	1	0.97	1	1	1	1	1	0.7	1	0	0
CAATGATAATAAAACTATAGATGCAGAGAATTTTCATTTGGATGTAGAGATTTCATATGAGAAAACTGAA	staphylococcal enterotoxin SeG	MW1937	MW2	1	1	0	0	0.34	0.0169	1_yellow	0.0007	0.13	0.29	0.13	0.39	0.04	0.02	0.57	0.78	0.79	0	0.27	1	0
CAATGGAGATTAACGAAAATAATAGTAATGTGAACAAAACAAACATAAAAGCGACTAAAATAAAATCAAC	hypothetical protein	SAR2115	MRSA252	0	0	0	0	0.33	0.6099	0_tan	0	0.71	0.67	0.54	0.91	0.99	0.21	1	0.25	0.46	0.43	0.89	0	0
CAATGTATAGTTTCGGAACGATTCCTCGTGGAGATACAGGCTATTTCTTTAATCAAGCATATAAAAAAGA	putative extracellular solute-binding lipoprotein	SAR0230	MRSA252	0	0	0	0	0.18	0.526	0_tan	0.3314	0.94	0.96	0.93	0.97	1	0.82	1	0.78	1	0.89	1	0	0
CAATTAAAGATTTACTACATTTAACTGAATCACAGCGGAATATTTTATTCTCAAGCCGAATACCAAGGAC	ORFID:SA0688~hypothetical protein, similar to ferrichrome ABC transporter	SA0688	N315	0	0	0	0	0.09	0.8107	0_tan	0.0299	0.9	0.92	0.87	0.95	0.75	0.98	0.97	1	1	1	0.75	0	0
CAATTACAACTAATAACTCTCCAAATCTAAAATTATATATAGATGGTGATATAAAAGGAAGCTCAGTAGG	staphylococcus tandem lipoprotein	SA0486	COL	0	0	0	0	0.46	0.1071	0_tan	0	0.19	0.32	0.13	0.6	0.18	0.05	0.38	0	1	0	0.22	0	0
CAATTGCCCATGAAATAGGACATTTTTTACACAATCATAAAAATAAAATCAAATATAGAAATAATAGTTA	hypothetical protein	SAR1885	MRSA252	0	0	0	0	0.32	0.5045	0_tan	0.0003	0.71	0.66	0.56	0.83	1	0.15	0.84	0.3	0.42	0.57	0.6	0	0
CAATTTATTATGTAATTAATTATAGCATTGATGAACAAGGTGTGCAATGTATTTTTGTAATATTACAATA	hypothetical protein	MW2353	MW2	0	0	0	0	0.34	0.3608	0_tan	0.2785	0.98	1	0.98	1	0.98	1	1	1	1	1	1	0	0
CAATTTTATCTGGAGATTACTAGCTTGTTATGTAACGAGTGTCACAGTGATTATAGTTGCCTTGATTATA	hypotehtical protein	SAVP033	Mu50	0	0	0	0	0.37	0.007	1_yellow	0	0.11	0.28	0.02	0.56	0.11	0.06	0.69	0.22	0.17	0.43	0.38	1	0
CACAAAAAGGTACAATTGCTAAATTAGATGGCATGGAAGGTTCTATGGTACAAGCAGGCAATCCAATTGC	putative exported protein	SAR2438	MRSA252	0	0	0	0	0.23	0.2782	0_tan	0.0067	0.93	0.98	0.91	1	1	0.84	1	0.93	0.89	1	1	0	0
CACAAGATTTTAAATCTGAGGAAAACGCTAAAAAGATTGCTGAAACTTTAAATCTTTTATATCAATTAAC	hypothetical protein	SA1763	N315	1	0	0	0	0.3	0.638	0_tan	0	0.58	0.62	0.46	0.82	0.41	0.57	0.75	1	0.88	0	0.75	0	0
CACAAGCTAAAACAATGATTAAACCGACAGGGATTGCCAATGACACAGGTAAATCAGTAGAAGAAATGAT	hypothetical protein	SAR1909	MRSA252	1	0	0	0	0.36	0.518	0_tan	0	0.8	0.85	0.68	0.99	1	0.36	0.95	0.8	0.56	0.83	0.82	0	0
CACACAGATATAATTTATGGAATTAATTTTACAAACACCTGTGCAAAACATCATAGTGATGAGGAAATGT	hypothetical protein, similar to AbiD1 [Genomic island nu Sa alpha2]	MW0368	MW2	0	0	0	0	0.29	0.0019	2_orange	0	0.32	0.57	0.1	0.97	0.19	0.11	0.93	1	0.3	0.4	0.92	1	0
CACAGTTCAATTCATTGATGAACCAAAAGCTATACAATACAGAGAAACTTTAAGATTAACTTCACTCTAA	putative exported protein	SAR1911	MRSA252	1	0	0	0	0.34	0.1139	0_tan	0.8677	0.53	0.4	0.48	0.45	1	0.02	0.17	0	0	0	0	0	0
CACATAAAGAAAAACATACTCGTCAAATTGCTGAAAAAAGATATATAGCTAGGAAAGCTGCATCATTAAT	lactose phosphotransferase system repressor	SA1998	N315	0	0	0	0	0.28	0.6059	0_tan	0.2906	0.99	0.98	0.97	1	1	1	1	0.86	0.71	1	1	0	0
CACATATTCCAAAAGGTAGAGGAATAGTTAAATGGAACGCATTTAAGACGATACCCCAGCAATATGAAAT	hypothetical protein	SAVP018	Mu50	0	0	0	0	0.34	0.6242	0_tan	0.0017	0.63	0.58	0.49	0.75	0.8	0.36	0.74	0.42	0.46	0.43	0.73	0	0
CACATGATGCCCAAGTGAAACTGTATAATGTTGTGTATTCATACAATGGCATTAAACGTAATTTCAAACA	hypothetical protein	SAR2568	MRSA252	0	0	0	0	0.28	1	0_tan	0.0052	0.85	0.85	0.78	0.94	1	0.68	0.93	0.9	0.6	0.83	0.73	0	0
CACATGTTCACGAAGTCAATGGCACTTATTACTTTCACGGACATTATAAAACGATGTTTAAAGGCGTGAA	hypothetical phage protein	SAR1536	MRSA252	1	0	0	0	0.3	0.5514	0_tan	0.0001	0.79	0.84	0.71	0.96	1	0.53	0.89	0.62	0.5	0.89	1	0	0
CACCAAGCAAAAATGAAAACAGACAAACTACAAAAGTTGTAAGTAGTGAAGCTACAAAAGATCAAAGTCA	iron-regulated heme-iron binding protein	SAR1103	MRSA252	0	0	0	0	0.34	1	0_tan	0.0334	0.78	0.77	0.71	0.86	1	0.4	0.75	0.5	0.55	0.33	1	0	0
CACCAATCAAGATCATTTTATTAAATATAGACCCGGCACAAATTACAACTATATTAGACGAGCTAAATAA	conserved hypothetical protein	SA1209	N315	0	0	0	0	0.08	0.7503	0_tan	0.3336	0.96	0.95	0.94	0.97	0.87	1	1	1	1	1	0.8	0	0
CACCAATTTCAACAGACAATGCAAGTTGGGGTAGGACATCGATAAAAAAATACTTTTTCTTTAGAAATTA	hypothetical protein	SAS1093	MSSA476	0	0	0	0	0.01	0.4726	0_tan	1	0.99	1	0.99	1	0.99	1	1	1	1	1	1	0	0
CACCCATTTATGTACTAAGTAATATTGCTGGCGTGCTAATCAACGATGTTGTTATACCTCAACTACCCTT	putative amino acid kinase	SAR0183	MRSA252	0	0	0	0	0.3	0.4236	0_tan	0.0132	0.8	0.85	0.76	0.91	1	0.58	1	0.71	0.6	0.67	0.75	0	0
CACCCTCGTTTTACATTTGATTCAAAGAAGAAGGTAAAAGATAAGATTATTTGCAACTTAAAAAGTCAAT	hypothetical protein	SA0298	COL	0	0	0	0	0.13	1	0_tan	0.4567	1	0.99	0.99	1	1	1	1	0.93	1	1	1	0	0
CACCTTTTCATTTTATCTTCTCATATATTTAAATCAATTACTTTTGATTGTGGTAAGGAGTTCTCAAACT	integrase/recombinase, core domain family	SA2729	COL	0	0	0	0	0.17	0.4315	0_tan	0	0.83	0.87	0.72	0.97	1	0.37	0.92	0.71	1	1	1	0	0
CACTAAAAAAGCTACTATTTCAAATTATGAGACAGGGTACAGAACTCCTAAACAAGATGATTTGTTTGAA	prophage L54a, repressor protein, putative	SA0321	COL	1	0	0	0	0.31	0.1404	0_tan	0	0.6	0.72	0.49	0.89	0.6	0.59	0.91	0.7	0.45	0.8	0.92	0	0
CACTAAAAGAACTTGATTTTAAATTAAGAAAGCAATTAATTAGTCAAAGTGGCTTGTATTCAAATGGTCT	exotoxin homolog [Genomic island nu Sa alpha2]	MW0382	MW2	1	1	0	0	0.38	0.018	1_yellow	0	0.19	0.38	0.1	0.63	0.15	0.07	0.69	1	0	0	0.36	1	0
CACTACCTGGTAATGTAAAAGAAAAAGAAAGTGCTAAAACAGTTTCAGCAAAATTGAAACAAGAGTTAAA	cysteine protease precursor	SA0900	N315	0	1	0	0	0.13	0.5552	0_tan	0.1344	0.93	0.95	0.91	0.97	0.8	1	1	1	1	1	0.87	0	0
CACTGATACTAGTTATTTCTACACCCAACGTTTTAGCAGAGAGTCAACCAGACCCTATGCCAGATGATTT	enterotoxin typeC3	SA1817	N315	1	1	0	0	0.41	0.0877	0_tan	0	0.2	0.33	0.14	0.62	0.02	0.08	0.73	0.8	0.73	0	0.67	0	0
CACTTCTTTTTAGACATTGTCGAATCGAAGATTGAAACAAAGCGAACTGCGAAAAGTTTTAAAGATATTT	hypothetical protein	MW1896	MW2	1	0	0	0	0.31	0.0003	3_red	0	0.26	0.54	0.13	0.83	0.26	0.12	0.9	0.88	0.56	0.5	0.58	1	0
CACTTGTTACTAAAGTTAATATATTTAAACATATACATTCGATGATGTGGACGACGATACCTGCATCAAT	ORFID:SA2094~hypothetical protein, similar to Na1/H1 antiporter	SA2094	N315	0	0	0	0	0.06	0.4867	0_tan	0.0658	0.95	0.97	0.94	0.99	0.88	0.98	1	1	1	1	1	0	0
CACTTTCAATTTGAAAGATGGAGAAAAGCAAGAAATTGATTTAGGTGATAAATTGCAATTCGAGCACATG	exotoxin homolog [Genomic island nu Sa alpha2]	MW0388	MW2	1	1	0	0	0.42	0.3248	0_tan	0.171	0.96	0.91	0.88	0.95	0.96	0.82	1	1	1	1	0.58	0	0
CAGAAAAAGAATTAGATGATATTGTTAAAGATGAGGTTGAAAAGAAAAATAATAAATATATGACGCAAGG	putative membrane protein	SAR1291	MRSA252	0	0	0	0	0.28	0.2891	0_tan	1	0.59	0.51	0.56	0.55	0.97	0.07	0.6	0	0.92	0.17	0	0	0
CAGAAGTGTTAAAACAACTTAGAGAATGGCATCTCGGCTACCTAGACCGAAAGCCAAACAACAAAGATTA	hypothetical protein	SA0909	COL	1	0	0	0	0.16	0.7463	0_tan	0.0379	0.96	0.95	0.92	0.99	0.97	0.93	1	0.83	1	0.88	1	0	0
CAGAGAATAAAGAAGAAGCAAAAGAGAAGTATGAGGCACAAGTTAAAAGGGATGCAATTATTAAAGCGAG	conserved hypothetical protein	SA0358	COL	1	0	0	0	0.46	0.8339	0_tan	0	0.75	0.77	0.4	0.99	0.68	0.57	1	0.82	0.57	0.8	0.93	0	0
CAGATATCGATAGTATTACTAGGTTAATTACTGATGACTATTATTTTACAATTCTTACAGACAGTTTTGG	hypothetical protein	MW0756	MW2	1	0	0	0	0.29	0.6618	0_tan	1	0.02	0.04	0.03	0.04	0	0	0.09	0.33	0	0	0.11	0	0
CAGATCTCAATAAACATTCTCATGTTTTTGATCAACAAACTATGATAATTACTGATCACGACATGTCTCG	fructose phosphotransferase system enzyme fruA homolog	MW2562	MW2	0	0	0	0	0.06	0.3634	0_tan	0.0593	0.94	0.97	0.92	0.98	0.85	1	1	1	0.95	1	0.94	0	0
CAGATTCTTTTATGCTTAAATATGGTTCCAATGTAAGTACAGAAAAAAGGCAACAAGTGTTAGAAGATTT	portal protein	MW1400	MW2	1	0	0	0	0.24	0.1202	0_tan	0.117	0.87	0.78	0.79	0.88	0.99	0.61	0.82	0.82	0.83	0.78	0.79	0	0
CAGATTGGAAAGGAGAAAGAAGGACTAAAAGTGACAGCAAAAAGAAAGATGTCGATTCTGAATTAAAAAA	hypothetical protein	SAR0286	MRSA252	0	0	0	0	0.25	0.3116	0_tan	0.0001	0.69	0.77	0.61	0.88	1	0.3	0.96	0.73	0.45	0.5	0.64	0	0
CAGCTTTAATCGGTTCAATTATCTTTATTGCAATCGTAACGTTAATTTTAAGAGCGGTTCGTAAAAAATA	putative membrane protein	SAR0392	MRSA252	0	0	0	0	0.19	1	0_tan	1	1	0.99	1	0.99	1	1	1	1	1	1	0.91	0	0
CAGGAATTCTCTTTGAAGAATTAGCACATAATAAACTTACATACGGTGATATAGCCGATTACTCGAAATT	hypothetical protein	MW1437	MW2	1	0	0	0	0.37	0.4107	0_tan	0.3978	0.61	0.54	0.6	0.53	0.83	0.36	0.33	0.56	0.46	0.56	0.55	0	0
CAGGTAAATCTATAGAAAACAGACCTGTTTTTCAAGAAGTATTAAATTTTTTAAGAATGGGAGATCGTTT	recombinase Sin	SAP015	N315	0	0	0	0	0.4	0.8335	0_tan	0	0.18	0.2	0.08	0.51	0.09	0.14	0.64	0.22	0	0.2	0.6	0	0
CAGGTGAAAAGACAAAAACATTTCATCAATATCAAGAAACATTAGAGTATATTTTATCCCATCATGTGAC	3-dehydroquinate synthase	MW1355	MW2	0	0	0	0	0.33	0.2265	0_tan	0	0.25	0.34	0.18	0.55	0.12	0.08	0.27	0.92	1	0	0.45	0	0
CAGGTGTACTCATCAATGATGTTGTTATACCTCAATTGCCATTAGTCGATATTCATCAATATATTGAACA	acetylglutamate kinase	SA0167	COL	0	0	0	0	0.05	0.4842	0_tan	0.0332	0.95	0.97	0.94	0.99	0.87	1	1	1	1	1	1	0	0
CAGGTTTATTAGAAAGTAGTAGAGAAACGCATTTCGCTTTCAAAATATATAATGATCCATTTGATATGGT	hypothetical protein	SAV0794	Mu50	1	0	0	0	0.45	0.0974	0_tan	0	0.06	0.15	0.02	0.38	0.09	0.07	0.38	0.14	0	0.2	0.2	0	0
CAGTAAAAGATAATCCGTTTGCGAATGCAAATGGTCCGATTGAAATAGATGACAATGATTTACCATTCTA	single-strand DNA-binding protein	SA1792	N315	1	0	0	0	0.09	1	0_tan	0.188	0.98	0.97	0.99	0.96	0.97	1	0.93	1	1	0.75	1	0	0
CAGTAGAATGGGACCAAGTATTTACGATAGCTTATGTAAATGATAGAGGTGGAGAGATCGTTTTTAATTA	conserved hypothetical protein	SA0291	COL	0	0	0	0	0.24	0.793	0_tan	0	0.93	0.91	0.82	0.99	0.98	0.64	0.93	0.82	1	1	1	0	0
CAGTATTTGCATTAGGAACAGATTTAATTTATCAAAATAATATTTTTGGATTAAAAGATAAAGTAGACTG	conserved hypothetical protein	SA0643	COL	0	0	0	0	0.33	0.2474	0_tan	0.0005	0.3	0.4	0.25	0.53	0.24	0.11	0.22	0.93	1	0	0.4	0	0
CAGTGGCTCGTCAAATTTATCCATTTAATGGTAATAAATCACAAGCATTACAACAATTGCCTAATTTCCA	putative lipoprotein	SAR2457	MRSA252	0	0	0	0	0.23	0.7238	0_tan	0.0189	0.77	0.8	0.72	0.87	1	0.45	0.89	0.75	0.47	0.56	1	0	0
CAGTTAATTCAGTTGAAACTATGAAATCAGTTGGTCCATCTATCGCGCCAACAAATGCTAAAGGTACATT	conserved hypothetical protein	MW1738	MW2	0	0	0	0	0.41	0.1784	0_tan	0	0.45	0.57	0.24	0.95	0.27	0.21	0.88	1	0.44	0.67	1	0	0
CAGTTGTTAATGTTTTAAAAGAAAATGGTGCAAAAACTGTGGGTATACGATTTGAAACGTTACCAGAAGA	conserved hypothetical protein	SAR2256	MRSA252	0	0	0	0	0.17	0.0678	0_tan	0.0001	0.81	0.91	0.77	0.97	1	0.61	1	0.91	0.54	0.89	1	0	0
CAGTTTTGTAAGTAAGAATGATATTATGTATTTATATTTTGAATATTACGAACTTTACAAAAATAAAGAA	hypothetical protein	SA1361	COL	0	0	0	0	0.5	1	0_tan	0.0001	0.95	0.96	0.76	1	0.97	0.82	1	0.9	1	1	1	0	0
CAGTTTTTGAGGGTAAAAAGTGTTTATGCCATAATGATTTTAGTTGTAATCATCTATTGTTAGATGGCAA	N-acetyltransferase	SAVP026	Mu50	0	0	0	0	0.45	0.1457	0_tan	0.0033	0.42	0.29	0.43	0.15	0.6	0.21	0.13	0	0.54	0	0	0	0
CATAAAAAGTTCAAGTTCTGCTCTTGGCAATGCTTTTAATCTTGCTGAATTATTGGATAATGCTACTAAT	hypothetical protein	SAV1989	Mu50	1	0	0	0	0.39	0.1876	0_tan	0	0.04	0.1	0	0.28	0.09	0	0.14	0	0.08	0	0.3	0	0
CATATAAATTCTAGAATATACTATTACAAAGTCACTGAAAACGCTGAAACTTCCAAACCCTTTGTTGTTA	conserved hypothetical protein	SA0374	COL	1	0	0	0	0.31	0.1122	0_tan	0.4178	0.94	0.86	0.92	0.87	1	0.82	0.91	0.89	0.92	0.78	0.7	0	0
CATATACAAAATGAATGTGCTGATAATGATTTACTCAAATTAAAAGGTGATTTTTATTCAATGATGAATG	hypothetical protein	SA1517	COL	0	0	0	0	0.37	1	0_tan	1	0.98	0.99	0.98	0.99	1	1	1	0.89	1	0.8	1	0	0
CATATACAGACACTGAAGAAATTATCAAAAGTATTGATAAAATTTTTGATAGTATTACTTATTTTGTAGC	ORFID:SA0193~hypothetical protein, similar to Enterococcus faecalis plasmid	SA0193	N315	0	0	0	0	0.37	0.7394	0_tan	0.8622	0.63	0.6	0.63	0.6	0.08	1	0.79	0.92	0.11	0	0.17	0	0
CATATATAGAAATGTGATTGTACTTGATTACGATGAAATAAATGATGTAAAACAACTACATGACGCAATC	pathogenicity island protein	SA0896	COL	1	0	0	0	0.43	1	0_tan	0.1527	0.08	0.09	0.07	0.16	0	0	0.5	0	0.58	0	0.13	0	0
CATATATCATCAGCCTTATCTTTAAGGGGCATGACCAAGTAATGATTATCTCGGTATCCGTTGCGACTTT	ORFID:SA0341~hypothetical protein, similar to low temperature requirement	SA0341	N315	0	0	0	0	0.15	0.1707	0_tan	0.0389	0.93	0.98	0.93	0.99	0.85	1	1	1	0.9	1	1	0	0
CATCAAAAGTTCACTAGAATACAAATTTTTGGTAAAGATATAGAAAGATTTAAAGCACGCAAAAATCCGG	exotoxin homolog [Genomic island nu Sa alpha2]	MW0386	MW2	1	1	0	0	0.15	0.2066	0_tan	0.2249	0.98	1	0.98	1	0.95	1	1	1	1	1	1	0	0
CATCAAATTGAATACGGTTATACAAAAATGATTATGAGTGCAAAGAAATCTGTATATTTACAATCACCAT	cardiolipin synthetase	SA1351	COL	0	0	0	0	0.54	0.3143	0_tan	0	0.6	0.7	0.42	0.98	0.55	0.32	0.82	0.75	1	0	0.92	0	0
CATCACAAGAGGAATTAATGAAAGTATTCCACTAGACCTTCAAATCTTACTTTGGCACATGGTAGAAAAA	hypothetical protein	MW0036	MW2	0	0	0	1	0.41	0.3002	0_tan	0	0.54	0.64	0.42	0.83	0.53	0.47	0.79	1	0.77	0.38	0.64	0	0
CATCATGGACTTCTTATCAAACTAGATATGAAGTTTTAAAGCAATTATGTACAACCTATAAAATGGCATT	phi PVL ORF 20 and 21 homologue	SAV1953	Mu50	1	0	0	0	0.1	1	0_tan	0.2257	0.97	0.97	0.96	0.99	0.99	0.95	1	1	1	0.33	1	0	0
CATCCAGAAACAAATTAGAACCTATCATGTTGATAATTGTAAATGATGTAGATCATCCGATAAATGAAAG	hypothetical protein	SA1641	N315	1	0	0	0	0.18	0.0271	0_tan	0.7806	0.97	0.89	0.94	0.92	1	1	0.96	0.29	0.14	0.33	1	0	0
CATCGCCTGAACATAATTATCAATTTGGTGGCGCTATGATAAAAAGTGAAGGAGTAGATAAATTATTAAA	hypothetical protein	SA2485	COL	0	0	0	0	0.19	0.7691	0_tan	0	0.93	0.94	0.86	1	1	0.68	1	0.93	1	1	0.94	0	0
CATGGTTAGCACTCTTTTTCCCAATGATTAATTGGCTGATTCCAAAAAAGTACGTCAAAATCAGCGAAAA	conserved hypothetical protein	SA0652	COL	0	0	0	0	0.19	0.0011	3_red	0	0.46	0.7	0.25	0.97	0.33	0.12	0.97	1	1	1	0.85	1	0
CATGTATTCTTAGTTATAGAAGATGAAAACCATAATCACAGTGATGCTGTTTTTGGAAAAAGTATATTAC	hypothetical phage protein	SAR2102	MRSA252	1	0	0	0	0.27	0.6964	0_tan	0.0014	0.8	0.83	0.73	0.92	0.97	0.62	0.89	0.57	0.64	0.4	1	0	0
CATTAAAATTTCAAACATTAAATGAAATCATTGAAACAATTAATAATTCTTCGCAAAGTTTAGAAGGTAC	hypothetical protein	SAR1896	MRSA252	1	0	0	0	0.29	0.8758	0_tan	0.0006	0.6	0.58	0.49	0.76	1	0.07	0.62	0	0.09	1	0.45	0	0
CATTAACGCCTTTAGATAGTAGTTTATTGAGAAAAGAACAAAATGATACGACAGATAAAGATAAGACATC	conserved hypothetical protein	MW0939	MW2	0	0	0	0	0.15	0.3892	0_tan	0.0185	0.92	0.95	0.9	0.98	0.76	1	1	1	1	1	0.86	0	0
CATTAATGGGTGGTAGTGATAATGTAGCAACGTCTCCATTCACATTAGTGTTTAAAAATGCTGGATTTCG	lysine specific permease homolog	SAV1682	Mu50	0	0	0	0	0.04	0.2422	0_tan	0.0024	0.93	0.97	0.9	0.99	0.82	0.98	1	1	1	1	1	0	0
CATTAGGTTATAAGGTCCTGTATGTTACTGATACGAAGTATCTGAAATACAAATTTAACGGCATTACGCA	hypothetical protein	SA1793	N315	1	0	0	0	0.15	0.6727	0_tan	0.6576	0.98	0.97	0.98	0.97	0.97	0.98	0.95	1	1	0.86	1	0	0
CATTATTACAAAAATTCGACTTTTGTAATAATATTTCACATTTTCGACACTTTTTTGCTATAAAACAACC	hypothetical protein	SA2454	COL	0	0	0	0	0.14	0.4976	0_tan	0.4732	1	0.99	0.99	1	1	1	1	0.86	1	1	1	0	0
CATTCTTTGTGTCTAATATGTCTCCAAAGAAAGGCAGAGCATTAGATATCGGATGTGGCTCGGGTTTGTT	hypothetical protein in transposon Tn554	SA0047	N315	0	0	0	1	0.33	0.2487	0_tan	0.0019	0.98	0.93	0.99	0.86	1	0.97	1	1	0.88	0.4	0.86	0	0
CATTGAAAATTTAGATGATGAAGTATTCCATTTAAGTGCATTACAAGACATGAATCGTATACCAATTGAC	hypothetical protein	SA1616	N315	0	0	0	0	0.08	1	0_tan	0.1024	0.99	0.98	0.97	1	0.94	1	1	1	1	1	1	0	0
CATTTCTAGAAAACTTTGCCATGAAAATGGTAGATATTGTTGTTAATGGATACATATTAATTACAGTACT	ORFID:SA2216~hypothetical protein, similar to ABC transporter, ATP-binding	SA2216	N315	0	0	0	0	0.11	0.4883	0_tan	1	0.99	1	0.99	1	0.98	1	1	1	1	1	1	0	0
CATTTGTTAGTGATAATACGTTAACAGTAAATGTGAATCGTTTACGAAAAAAATTATCTGAAATTAGTAT	DNA-binding response regulator	SA0716	COL	0	0	0	0	0.1	0.583	0_tan	0.0261	0.92	0.95	0.9	0.97	0.78	1	1	1	1	1	0.83	0	0
CATTTTCAAAAGTTTATTAGCGAAATAGATACGTTAGTCTTAAAAGTGATTAGTCGTATAACAGTAATTG	hypothetical protein	SAR0089	MRSA252	0	0	0	0	0.39	0.8629	0_tan	0.012	0.66	0.63	0.57	0.78	1	0.11	0.9	0.2	0.33	0.43	0.45	0	0
CATTTTCAGTAGGTACTATATGCTTAATCGTCTTAAATATTTTTATAAATCCTGACGTTTTCTCATTACA	putative membrane protein	SAR0626	MRSA252	0	0	0	0	0.2	0.7585	0_tan	0.6403	0.69	0.66	0.66	0.7	1	0.43	0.79	0.36	0.4	0.5	0.46	0	0
CATTTTGATACCAATACTAAAAGTTGCATATCCGTTTTTTAAAAAAGTTGAAAGAGAAAAGTGGTATTTT	hypothetical protein	SA2633	COL	0	0	0	0	0.09	0.4142	0_tan	0.0109	0.96	0.98	0.94	1	0.9	1	1	1	0.95	1	1	0	0
CCAAAACAAAATTAGATTAACGGATTCTGGAACTGTTGTAAGTGGTGATTATATTAGAGCTTCAATTAAT	hypothetical protein	MW1426	MW2	1	0	0	0	0.25	0.4048	0_tan	0.3956	0.94	0.91	0.91	0.95	1	0.84	0.9	0.91	1	0.73	1	0	0
CCAAAGAAATGATATTAATTCCAGACATTACCGAAGCAATAAATCTCACTAATTTATTTGAGCTCATAAA	hypothetical protein	SA0087	N315	0	0	0	0	0.31	0.6656	0_tan	1	0.87	0.83	0.85	0.86	0.74	1	0.91	0.4	0.6	1	0.5	0	0
CCAAATCCAAAAGACACTATTAGTTCTCAATTTTATTGGGGTTCTAAGTACAACATTTCAATTAATTCAG	Panton-Valentine leukocidin chain F precursor	MW1378	MW2	1	1	0	0	0.35	0.1185	0_tan	0.7285	0.04	0.11	0.06	0.09	0.04	0	0.14	0.5	0.17	0	0	0	0
CCAACGCAAGAGTTACGTGAACAAGGTGTAAGAGTTAAGCTATCTGCAGTGAAAGATATTGTAGACGGTA	putative amidophosphoribosyltransferase precursor	SAR1044	MRSA252	0	0	0	0	0.17	0.4171	0_tan	0.3279	0.72	0.78	0.72	0.78	1	0.51	0.67	0.58	0.47	0.63	1	0	0
CCAACGCACCAACTAACAAACCAACTACAGCAGTTTCAACAACAGGAAACAAAAGACACGATGTAGATGC	hypothetical protein, similar to 5-nucleotidase	MW0023	MW2	0	0	0	0	0.12	1	0_tan	0.3598	0.98	0.98	0.97	0.99	1	0.94	1	1	0.91	1	1	0	0
CCAACGTTTAAACTTGGCTGTTTTTTAGTTTTCGGATATATTTTCGCTGGAAGTTTTTCAATATTTTCAT	conserved hypothetical protein	SA0651	COL	0	0	0	0	0.15	0.0232	1_yellow	0	0.47	0.64	0.3	0.86	0.3	0.19	0.93	1	1	1	0.67	1	0
CCAAGACCGAAATAGATTAACGGATTCAGGAGCTGTTGTAAGTGGTGACTATATTAGAGCTTCAATCAAT	hypothetical phage protein	SAS0908	MSSA476	1	0	0	0	0.33	0.5391	0_tan	0.3973	0.84	0.79	0.8	0.86	1	0.63	0.8	0.75	0.82	0.75	0.75	0	0
CCAAGACGAATAAAAACGATTATAAAGATTTCGTAAATAATGTAGGTCTAGAAATAACTAAACCAACAGG	exotoxin	SAR0435	MRSA252	1	1	0	0	0.36	0.8685	0_tan	0.0002	0.61	0.63	0.51	0.83	1	0.1	0.5	0.25	0.1	1	0.33	0	0
CCAATCCATTTGCTAAAGAATTGGAAAACCGTAAAAAAGCTGCGATTTCAAAAATTAAAGATATTTCTAC	very large surface anchored protein	SAR1447	MRSA252	0	0	1	0	0.3	1	0_tan	0.7488	0.61	0.6	0.59	0.62	1	0.12	0.38	0	0.17	0	0.95	0	0
CCAATCGTTTTAAAATTATTAGAATGGGTGCTGACATTAGAATTAAGTGTGAAAATTGTCAACGAAGCAT	conserved hypothetical protein	SA0350	N315	0	0	0	0	0.16	1	0_tan	0.4726	0.99	1	1	0.99	1	1	1	1	1	0.88	1	0	0
CCACTAACAATAAATTACCTAATCATATTTACAATTATCTTTATTGTGGTTTACACATTGATTTGGATTA	putative membrane protein	SAR2450	MRSA252	0	0	0	0	0.29	0.4914	0_tan	0.0002	0.7	0.76	0.62	0.87	1	0.24	0.95	0.29	0.27	0.5	1	0	0
CCACTAGCTAATAACATCAAAGAAAAAGAAAGTGCTAAAACAGTTTCACCACAATTAAAGCAAGAGCTAA	cysteine protease precursor	SAR1021	MRSA252	0	0	0	0	0.34	1	0_tan	0.0065	0.95	0.95	0.9	1	1	0.72	1	1	0.88	1	1	0	0
CCACTATTTCTGGGGTTGCTAACTATGCTGTATCACAAGATGGAGAAAATGGTGCAGAAATTCATTTGTT	phage terminase, large subunit, putative	SA0367	COL	1	0	0	0	0.34	0.1043	0_tan	0.807	0.91	0.82	0.87	0.85	1	0.77	0.8	0.89	0.69	0.73	0.86	0	0
CCAGAAAAATTAAATCAAAAAGATTTAAACTTACTTAAGACACTTTATGATAATGGCACGCCAATTAAGA	DNA-invertase	SAP013	N315	0	0	0	0	0.25	1	0_tan	0.0006	0.83	0.82	0.73	0.93	1	0.41	0.89	0.94	0.62	0.9	0.82	0	0
CCAGAAAAGAAGTGAATTACGCTGCTAATACAGATACAGTAACAACATTGTTTAGTACAAAGGAAAATTT	hypothetical protein	SA1531	COL	0	0	0	0	0.21	0.0008	3_red	0	0.42	0.66	0.2	0.94	0.39	0.15	0.96	0.58	1	0.63	1	1	0
CCAGTCATGGCATCTGCATTCTTAATCTTTACCATTGTCATCATGTTTATTGCTGGAACAGGACAATATG	conserved hypotehtical protein	SA0065	N315	0	0	0	1	0.25	0.0926	0_tan	0.0001	0.96	0.88	0.98	0.81	0.97	0.98	0.89	0.83	0.82	0.67	0.75	0	0
CCAGTTGTTGTTGTGCTCCATAGTACACATTTATCCGGTACCGGTAATGGTATAAAAAGTTTTTATAAAA	ORFID:SA0522~hypothetical protein, similar to poly (glycerol-phosphate) alp	SA0522	N315	0	0	0	0	0.1	1	0_tan	1	1	0.99	0.99	1	1	1	1	0.83	1	1	1	0	0
CCATACTGTTAAATTAATCGGTACGGATCTAAAGAAACTAATCCTGGAGTATAGAATTGTATATGATTAA	leukotoxin F-subunit	SAV1819	Mu50	1	1	0	0	0.23	0.5217	0_tan	0.0088	0.85	0.88	0.8	0.93	0.4	1	0.96	1	1	1	0.67	0	0
CCATCACAATCTTTAGTAAATTGAAACCACAATTACCTACATGTCGCGTGATTTTTACTCCGCATCTCAA	conserved hypothetical protein	SAR0007	MRSA252	0	0	0	0	0.13	0.4928	0_tan	1	0.99	1	0.99	1	1	0.98	1	1	1	1	1	0	0
CCATCAGATTATAAAAAGCCTGAAGAAAAAACATCAGATACTGAACGTAAATTAAATAGTAAGGAATTTT	putative membrane protein	SAR1296	MRSA252	0	0	0	0	0.31	0.386	0_tan	0	0.76	0.69	0.58	0.94	1	0.15	0.8	0.5	0.88	0.8	0.67	0	0
CCATGAAAGAACCAAACAAACAAGATATTAAGATTTCACATTCCTATTTATACGGTAATTCTGATAGTAC	putative membrane protein	SAR2453	MRSA252	0	0	0	0	0.29	1	0_tan	0.0037	0.7	0.71	0.61	0.82	1	0.19	1	0.22	0.33	0.17	1	0	0
CCATTACCATTAAAATTTGGAGATTATCTATCGGCTTCAAGTATGCGTTCATTAATTAATATCGCAGCGC	putative siderophore biosynthesis protein	SAR0121	MRSA252	0	0	0	0	0.11	0.4836	0_tan	1	0.99	1	0.99	1	1	0.98	1	1	1	1	1	0	0
CCATTCCTCGCTAAAGTCTGAAACTCTTTACATCAATAATCAGCTTAATAGCTCTAATCATATTGTAATA	transposase	SA0062	N315	0	0	0	1	0.32	0.0138	1_yellow	0	0.89	0.73	0.93	0.55	0.93	0.95	0.73	0.56	0.5	0.2	0.5	1	0
CCCACTTTGCATAAAGTACTTATCGTTAACTCAACGCAAGTTGTTCCTATTCACAAAAAGCACATACAGT	hypothetical protein	SA1610	N315	0	0	0	0	0.07	0.3133	0_tan	0.0356	0.94	0.97	0.93	0.99	0.9	1	1	1	0.8	1	1	0	0
CCCATTTTCCAACAAAAATATATTAAGCCATTCATTTAATGGTAAAAAATCATTACTCAAAAGTAGATTA	bla regulator protein blaR1	SAP011	N315	0	0	0	0	0.38	0.228	0_tan	0	0.61	0.71	0.38	0.95	0.45	0.26	0.96	0.94	0.64	0.9	0.94	0	0
CCCTATTGTCATTCGACACTCACAAACATGACTGTCCGAAAACCAGATCATTCATTGCGTTACTATGTCT	site-specific recombinase	SAS0033	MSSA476	0	0	0	0	0.53	0.7332	0_tan	0.0112	0.07	0.09	0.04	0.24	0.11	0.05	0	0	0	0.2	0.25	0	0
CCCTGATCCGTTATCTAATCCTATGTCTGACCCTTTACTAGGAGATAGTTGGATGGTAGGTGATTTGAAA	hypothetical protein	SAS0077	MSSA476	0	0	0	0	0.3	0.0297	0_tan	0	0.41	0.59	0.24	0.87	0.38	0.19	0.91	1	0.57	0.33	0.77	0	0
CCGAATTGAACCTTCAGTAAATATAGAGATACATCATCATTTCTTATACAATACAAGAGATTTATATTAG	hypothetical protein	SA1391	COL	0	0	0	0	0.17	0.2033	0_tan	0.1855	0.98	1	0.98	1	0.97	1	1	1	1	1	1	0	0
CCGCTTATGGTAAGACAATCCAAGATTTAGGCATTGACTCAGCATTGACAGCAGCACTTGCGGCTGCAAC	putative permease	SAR2430	MRSA252	0	0	0	0	0.23	1	0_tan	0.0908	0.8	0.8	0.75	0.86	1	0.61	1	0.45	0.54	0.63	0.92	0	0
CCGTCGATTCCTACAATTGATAAAAATGGCATTGAAATTAGAGATGAAATTGTTTTGACAAAATATTTGT	conserved hypothetical protein	MW0053	MW2	0	0	0	0	0.27	0.8194	0_tan	0.0011	0.89	0.86	0.79	0.96	1	0.44	0.92	1	0.78	0.25	1	0	0
CCGTCGATTCCTGAAATGGGTGAAAATGGCATTGAAATTAGAGATGAAATTGTATTGAAAAAATGTTTAT	acetyltransferase (GNAT) family protein	SAR0098	MRSA252	0	0	0	0	0.14	0.0806	0_tan	0	0.84	0.92	0.77	0.99	1	0.6	1	1	0.69	0.88	1	0	0
CCTGAATCTATGAATACATTAAGAGAATTAGCAGAAGCAATACAAAACAACTCTATTTCAGAAAGTGTAT	hypothetical protein	SAV0910	Mu50	1	0	0	0	0.25	0.1608	0_tan	0.5327	0.88	0.8	0.85	0.81	0.87	0.9	0.69	0.75	0.54	0.88	0.87	0	0
CCTGATCAAGCATTTTGTAAAGGTACAGTTCGTACATTTGACTCGAAAATACAAGAACATGTCATGCATA	putative peptidase	SAR0554	MRSA252	0	0	0	0	0.41	1	0_tan	0.4862	0.93	0.94	0.92	0.96	1	0.88	0.86	0.88	0.8	0.8	1	0	0
CCTGTATACCCAGGTAATACATTGTACGTTATCGCTGAAATTACAAATAAGAAATCCATAAAAAAAGAAA	MaoC domain protein	SA0032	COL	0	0	0	1	0.21	0.0162	1_yellow	0	0.91	0.77	0.99	0.6	0.92	0.97	0.65	0.77	0.81	0.29	0.54	1	0
CCTTAAAGAAGTGACTGGTGAGTTTAAAGATAAAATTTCATACAAATACGATAACGTAGCAAGTATTAAT	fibrinogen and keratin-10 binding surface anchored protein	SAR2709	MRSA252	0	1	1	0	0.3	1	0_tan	0.5731	0.78	0.77	0.76	0.81	1	0.53	0.67	0.4	0.38	0.5	1	0	0
CCTTCACTACCAGATCATAAGAAAAGAGAGATCAAATTCTTATATGATGAACAAAAGCTGTCTGGTGAAG	hypothetical protein	SAVP012	Mu50	0	0	0	0	0.37	0.0202	1_yellow	0	0.33	0.53	0	0.96	0.23	0.2	0.95	0.64	0.45	0.67	0.83	1	0
CGAAAACATTAATATCATTGGTGCAAAATGTTGTTAAATATATTGTGTGGTTTATAGTTGTAACTACCAT	putative membrane protein	SAR0358	MRSA252	0	0	0	0	0.27	0.3743	0_tan	0.0058	0.74	0.8	0.69	0.88	1	0.41	1	0.38	0.27	0.57	1	0	0
CGAAACTATTATTGAAAGGCGATGGAGATTTAAAAGGTTCATCCGTAGGTTCTAGAAGTCTTGAATTTAC	Staphylococcus tandem lipoprotein	SA2493	COL	0	0	0	0	0.2	0.4579	0_tan	0.0478	0.95	0.97	0.93	0.99	0.94	0.96	0.94	1	1	1	1	0	0
CGAAAGCAGCTAACTTTGTACGTAACGATTTACCACAGTTGGAGCAACGTTTAACCAATGCGACTGCAAG	putative membrane protein	SAR2722	MRSA252	0	0	0	0	0.24	1	0_tan	0.7364	0.73	0.73	0.72	0.75	1	0.44	0.83	0.46	0.43	0.57	1	0	0
CGAAATTGAACGAAAATTCAAAAACACTATATCGTGACTTAGTTGAAGAAAAGCTGATTTCTATCAAATA	truncated transposase	MW1309	MW2	0	0	0	0	0.34	0.0383	0_tan	0	0.68	0.83	0.56	0.96	0.89	0.18	0.92	1	1	1	0.92	0	0
CGAATATTGAAGGTATTGAAGATAATTATACACCATTAATTATTAAGCCATCTGTCATAAAAGGTATAAA	3-phosphoshikimate 1-carboxyvinyltransferase	SA1504	COL	0	0	0	0	0.11	0.8307	0_tan	0.282	0.88	0.89	0.86	0.91	0.69	1	0.93	1	1	1	0.69	0	0
CGAATCCAAAACCAGATCCAGATAACCCGAAACCAAAACCAGACCCAGATAAACCAAAGCCAAATCTGGA	ORFID:SA1839~hypothetical protein, similar to SdrH	SA1839	N315	0	0	0	0	0.05	1	0_tan	0.6217	0.98	0.98	0.97	0.99	0.93	1	1	1	1	1	1	0	0
CGAGGTCTCCATCAAGAAATTAGCAATGATTATTTAGAGCCCTACCATGATACGTTAATACAATTACATG	ORFID:SA0958~myo-inositol-1(or 4)-monophosphatase homolog	SA0958	N315	0	0	0	0	0.05	1	0_tan	0.8155	0.91	0.91	0.9	0.92	0.78	0.98	0.97	1	1	1	0.72	0	0
CGAGTATGATTTAACACCTTCGCCGTTAGGAAAATGGATAAAGCAATATCAAAACACGGGTACATTCAAT	transposase	SAR0081	MRSA252	0	0	0	1	0.03	1	0_tan	0.1155	0.99	0.98	1	0.97	1	1	1	1	1	0.75	1	0	0
CGAGTGAAGTGAACTTTAGAACTCAATTAACTGGATACCCTGAAAATCGCTATAAAACATATTATTATTA	fibronectin-binding protein precursor	SAR2580	MRSA252	0	1	0	0	0.23	0.4433	0_tan	0.8769	0.68	0.62	0.64	0.66	1	0.33	0.79	0.38	0.3	0.22	0.54	0	0
CGATAAAAGTAACTTCCAAAAAAACTTAATATTTTCACTTGTCATATTCCCATTCTTATTTGTGCCTTAC	putative membrane protein	SAR1910	MRSA252	1	0	0	0	0.36	1	0_tan	0.046	0.71	0.72	0.66	0.81	1	0.36	0.77	0.33	0.42	0.75	0.5	0	0
CGATTACGGCATAAAGATATCAATACCACTATGAATATCTATGCTAAAATCACAAATTCATACAAAAAAG	integrase/recombinase-related protein, authentic frameshift	SA2015	COL	0	0	0	0	0.28	0.0216	1_yellow	0	0.35	0.53	0.2	0.77	0.34	0.12	0.65	1	1	0.29	0.5	1	0
CGATTTAAATTATTATCTTGATTCATTTGAAAATGATTCAGATGAAATAGTTACCGCATCACTTAAAATC	hypothetical protein	SA1791	N315	1	0	0	0	0.38	1	0_tan	0.6731	0.03	0.03	0.04	0.03	0.04	0.03	0	0	0	0	0.33	0	0
CGATTTGAAAATTTAACAGAGATTCAAGCACGTAGCGAAGAAATTAAATATTATCTAGCTGAAGCAATTA	conserved hypothetical protein	MW2373	MW2	0	0	0	0	0.1	0.1567	0_tan	0.003	0.94	0.98	0.92	1	0.85	1	1	1	1	1	1	0	0
CGCATCCTGGTTTTCCAACCGATATGCAGTCACAAATGATGGCATTATTATTAACAGCAAACGGACATAA	putative UDP-N-acetylglucosamine 1-carboxyvinyltransferase	SAR2188	MRSA252	0	0	0	0	0.23	0.7667	0_tan	0.0014	0.92	0.95	0.88	1	1	0.8	1	0.91	0.73	1	1	0	0
CGGACGATTGTGTTCTAATCATAGAGGCTCAATGGAAGAACTACGGGACGAAAACCAGACGATAACTCAA	hypothetical protein	MW2135	MW2	0	0	0	0	0.32	0.0596	0_tan	0	0.41	0.57	0.22	0.88	0.39	0.18	0.86	0.93	0.31	1	0.73	0	0
CGGAGACGTTAAATTTGTTATATCAATTAACTAACAAAAAACAACGTGTGAAAGTAGTGAAAGAAGTTGT	hypothetical phage protein	SAR2046	MRSA252	1	0	0	0	0.18	0.8146	0_tan	0.0001	0.91	0.89	0.82	0.99	0.98	0.83	0.96	0.71	0.67	0.86	1	0	0
CGGCTATAAACAAAAAACAGAATATCATAAACAAATGTATATGCGCGAGAAGCAAATAGAGGATCATTTA	truncated Pre protein	SAP024	N315	0	0	0	0	0.22	0.3739	0_tan	0	0.85	0.9	0.74	1	1	0.47	0.96	1	0.8	1	0.94	0	0
CGGTTGACGGACGTAGCAATGCGTATGAATTGAACGATTTCAAGGAGTATGAAGCTATTATTGATAATTA	hypothetical protein	SAV0894	Mu50	1	0	0	0	0.24	0.5806	0_tan	0.4559	0.77	0.82	0.77	0.83	0.77	0.89	0.84	0.64	0.69	0.63	0.81	0	0
CGTAAGATTCCATTGTTTATCTTTTTCGTATCAATCGTTGGTCCTCTATTAGAAGAATATGTATTTAGAA	putative membrane protein	SAR2118	MRSA252	0	0	0	0	0.12	0.6247	0_tan	0.0704	0.79	0.76	0.72	0.83	1	0.51	0.83	0.57	0.47	0.67	1	0	0
CGTATTACAAGTCATAGTTTATGTACTCCTGGTTGTGCTAAGACTGGTAGTTTTAATAGCTTCTGCTGTT	lantibiotic epidermin precursor EpiA	SA1878	COL	1	0	0	0	0.26	0.0035	2_orange	0	0.46	0.68	0.23	0.98	0.38	0.21	0.96	1	1	0.83	0.91	1	0
CGTGAATTGGGCCGTTATTTATTTAAAAATACAGACTTAATGAGAGATAGTAACGATAATAGTCTAAAGA	hypothetical protein	SA1851	COL	1	0	0	0	0.33	0.1286	0_tan	0	0.26	0.37	0.11	0.68	0.18	0.06	0.6	0.25	1	0.33	0.46	0	0
CGTGACAGCGATCGAAAAGAATTTGAAGAATGTATTCAAATTATTAGAAAGTCTGACAGTATTAATGAAT	heptaprenyl diphosphate syntase component II	MW1359	MW2	0	0	0	0	0.35	0.0565	0_tan	0.0001	0.11	0.24	0.09	0.36	0.11	0.02	0.5	0.86	0	0.14	0.22	0	0
CGTTCAGGAATCGCATTTTCGTCTAAACGGTTACTGAAATTAGCTATTATATTATATGGATTAAAGTTAA	putative membrane protein	SAR0718	MRSA252	0	0	0	0	0.31	0.2141	0_tan	0.8728	0.54	0.44	0.5	0.48	1	0.05	0.2	0	0.1	0.13	0.33	0	0
CTAAAAAGAAAAAAGGCGAGGCATTATTACTATACGGAACACAAAGAGCATTTATAAGAATTGATTTAGA	traE protein	VRA0012	Michigan	0	0	0	0	0.49	1	0_tan	0.2918	0.63	0.62	0.6	0.71	0.74	0.5	0.5	0.67	0.4	0	1	0	0
CTAAAGAATGTAATGAAATAACTATGCAGAATTTTCAACAGTTTATGGTTGAAAACGAAAATACGATTGA	hypothetical protein	SAS0047	MSSA476	0	0	0	0	0.38	1	0_tan	1	0.01	0	0.01	0	0.02	0	0	0	0	0	0	0	0
CTAAAGATGATGGTATTGTGCAACCGAACATTACAGAAGACATTAAGAAAACATTAGAGGATATAAAAAA	ORFID:SA2339~hypothetical protein, similar to antibiotic transport-associat	SA2339	N315	0	0	0	0	0.05	1	0_tan	0.2315	0.99	0.99	1	0.98	1	1	1	1	1	1	0.87	0	0
CTAAATACAAAAATCATCAAATAGAAACTAATGAAAAACGAATTAAAAATCATTTGAATCGCGCTTTTAA	truncated transposase	SA1622	N315	1	0	0	0	0.05	1	0_tan	1	0.99	0.99	0.99	0.99	1	1	1	1	1	0.75	1	0	0
CTAAATCTCATAAGACGCCTAGATATTACTTTGCTAACGAGCATGAGATTGAAAGATATTTTGAATTTTT	hypothetical protein	MW1417	MW2	1	0	0	0	0.31	0.0117	1_yellow	0	0.22	0.41	0.06	0.79	0.26	0.12	0.8	0.44	0.23	0.5	0.75	1	0
CTAAATTATATACACACTTAAAAGATAAACAAGGCTATATTGGCGCTGAAGAATTACAAGCATTTTTAGC	hypothetical protein, similar to flavohemoprotein	MW0216	MW2	0	0	0	0	0.06	0.4242	0_tan	0.0134	0.96	0.98	0.95	1	0.92	1	1	1	0.95	1	1	0	0
CTAACATTGTGTATGGACCGTTGCAAAAAGGTGAACCAGTTAGAACAACTGAACTAATGGCAACAAGATT	phage regulatory protein	SAS0929	MSSA476	1	0	0	0	0.3	0.0661	0_tan	0.0368	0.92	0.82	0.82	0.93	0.98	0.69	0.84	1	0.83	1	0.71	0	0
CTAACTGCATTCAATACAAACTTCAATCCTAATACAGGAACTAAAGGCGCATTAGAATATAATGATAAAA	methicillin-resistant surface protein	SA0050	COL	0	0	1	1	0.42	0.0972	0_tan	0.014	0	0.05	0	0.09	0.02	0	0.13	0	0	0	0.13	0	0
CTAAGCATTCCATTACAATATTTAGTTGCAGCAGCATTAGAAGTAACTGATGTGAATATATTTAAGCCTT	conserved hypothetical protein	SA0907	N315	0	0	0	0	0.03	0.4721	0_tan	0.4936	0.99	1	0.99	1	0.98	1	1	1	1	1	1	0	0
CTAAGTGATAAAAAGAACGACAAACAAGGAGTTCAAATGGTATTGATTAAACATTTTGGCGATATTGTAG	3-dehydroquinate synthase	SA1298	N315	0	0	0	0	0.22	0.0771	0_tan	0.0004	0.53	0.4	0.59	0.33	0.05	1	0.16	0	0	1	0.13	0	0
CTAATCAAAGTAAGTTATTGAAATACACAACAGATCAAACGAATATTGTATCAATCAATAGTGATGGTCA	hypothetical phage protein	SAR2053	MRSA252	1	0	0	0	0.13	0.214	0_tan	0.7493	0.97	0.93	0.94	0.96	0.99	0.98	0.93	0.82	0.87	0.6	1	0	0
CTAATGATGCAACAGAACTTAATACGAACGATCAATTATATCAAAAGCTTGTTAATTCACATTTGAAAGG	putative NADH-Ubiquinone/plastoquinone (complex I) oxidoreductase protein	SAR0633	MRSA252	0	0	0	0	0.24	0.7333	0_tan	0.3005	0.76	0.74	0.72	0.79	1	0.43	0.75	0.44	0.36	0.57	1	0	0
CTAATTAAATATGAACAAGGTGAAGTAGTAAACGATATTAATACAGTGATTGATGATTTAGTATCTGATC	cell division and morphogenesis-related protein	SA0249	N315	0	0	0	0	0.18	0.1556	0_tan	0.0004	0.87	0.93	0.83	0.98	0.65	1	1	1	0.38	1	1	0	0
CTAATTATGGAGCATATTATGCAATATATTAAAGGTGTGGCTGTTGAGAGTACATACGTTAGTCTGATTG	acetyltransferase, GNAT family	SA2368	COL	0	0	0	0	0.33	0.0529	0_tan	0	0.32	0.47	0.2	0.7	0.17	0.13	0.8	0.44	1	0.5	0.5	0	0
CTAATTCCTGTTAACTGTATTATAACAACTTTACAGCAAAAAAATGCAAAATCAACTAATAAATTAATGA	hypothetical protein	MW2436	MW2	0	0	0	0	0.15	0.7573	0_tan	0.0002	0.94	0.95	0.88	1	0.71	1	1	1	1	1	1	0	0
CTAATTTCTCAAAAAGATTTTGAAGTTGGAAACTCAATATACTTAAATATCTTAGTAAAAGATATCGAAG	hypothetical protein	SAR0715	MRSA252	0	0	0	0	0.28	0.7525	0_tan	0	0.62	0.65	0.5	0.82	1	0.15	0.68	0.42	0.27	0.43	0.67	0	0
CTACAGCTGAAAGAATATATCCAATAGTACTTGAATCTCTAATGATAGCAATTACTGAGATTAGACCTGG	Xaa-Pro dipeptidase	SAV1529	Mu50	0	0	0	0	0.6	0.0605	0_tan	0	0.35	0.56	0.09	0.98	0.42	0.17	1	0.5	0.17	0.5	0.91	0	0
CTAGAAATCCTTGTTCACATCACGACCACAGTCATCAGTGGTTGTATTATTGCGTTATTTACGCATTGGC	conserved hypothetical protein	VRA0033	Michigan	0	0	0	0	0.31	0.3598	0_tan	0	0.73	0.8	0.62	0.97	0.82	0.6	0.94	0.77	0.85	0.75	0.83	0	0
CTAGGTTCTATGGGGACTATGGCAGGTAGTCAAATTATGTTTATTCTATTTATTCTATTGATTTTAGTAT	traL protein	VRA0019	Michigan	0	0	0	0	0.38	0.0664	0_tan	0.0019	0.52	0.36	0.54	0.25	0.68	0.4	0.13	0.38	0.27	0	0.13	0	0
CTAGGTTTGAATGATTTAGTCCGTATAGTACAAGTTAAAACGATTAGGGGTATAAACAATGTAATTGTTA	hypothetical protein	SAV0903	Mu50	1	0	0	0	0.3	0.7542	0_tan	0.0567	0.6	0.57	0.65	0.5	0.63	0.69	0.33	0.38	0.46	0.29	0.79	0	0
CTAGGTTTGAGAAACTTATCGATTATTCATCAAATCTTAACACAAGTCAAAAAAGATTTAGGTATTAATA	DNA POLYMERASE III ALPHA SUBUNIT	MW1646	MW2	0	0	0	0	0.08	0.4229	0_tan	0.0056	0.91	0.95	0.88	0.98	0.76	1	0.97	1	1	1	0.94	0	0
CTAGTACAACTAAAACATAAAACGGAATCAACTATTATCTTAGTCGCTCACGATATTGATGAAGCTATTT	putative ABC transporter ATP-binding protein	SAR0173	MRSA252	0	0	0	0	0.16	0.5548	0_tan	0.0092	0.83	0.87	0.79	0.92	1	0.63	0.96	0.75	0.58	0.78	1	0	0
CTAGTATTACTGACAAGGACAATGTGAACTTTAATAAGCCAATCACCTTTGCTAATACGTACTTAAGAGA	putative membrane protein	SAR1861	MRSA252	0	0	0	0	0.3	0.7276	0_tan	0	0.73	0.76	0.62	0.9	1	0.19	0.94	0.57	0.5	0.29	1	0	0
CTAGTTACTGTTTAGAAAGAAGTAACAACCCTGAATTGTTGCGAGCAGTTGCAGAGTTGTTAAAGAAGGT	hypothetical protein	MW1930	MW2	1	0	0	0	0.28	1	0_tan	0.1394	0.98	0.98	0.96	1	0.98	0.94	1	1	1	1	1	0	0
CTATAATGTTCGTAATTACAGATTACAAAAAAATTTCATTTTCCACCACATTTTAGGAGTTACTTTAATG	hypothetical protein	SA2265	N315	0	0	0	0	0.33	1	0_tan	0.3714	0.93	0.92	0.91	0.95	0.76	1	0.95	1	1	1	0.6	0	0
CTATATTGTATTAGATGATAAACAAGTCATCGAAAACTCAGACTTATTCTTCAAAGGAAAGTTTGATAGC	hypothetical phage protein	SAR2070	MRSA252	1	0	0	0	0.13	0.1119	0_tan	0	0.82	0.9	0.73	1	0.99	0.63	0.96	0.86	0.75	0.88	1	0	0
CTATCATCGGAAATAAAAATGAATTCAATGGAAAATGTTTCATTTGAACTATTGCAACAATTTTCATCGA	DNA polymerase III, alpha chain	SA1525	N315	0	0	0	0	0.42	1	0_tan	0.6306	0.84	0.83	0.82	0.86	0.66	1	0.92	0.6	0.4	0.33	0.8	0	0
CTATCCCAAATAGTGATAGCTATATTCAAAAAAGGGACTTTTTTATTTTTAATAAGAAGGTTAACGGTTA	alkaline phosphatase synthesis sensor protein	SAS1620	MSSA476	0	0	0	0	0.1	0.3607	0_tan	0.0598	0.93	0.96	0.92	0.98	0.77	1	1	1	1	1	1	0	0
CTATCGAAAATCAATATAACGATAGAGATGAACAACTGGAACATTCAAAAGCTATTCTTAACTTACCTAT	hypothetical phage protein	SAR2048	MRSA252	1	0	0	0	0.1	0.3928	0_tan	0.3744	0.96	0.93	0.93	0.96	0.99	0.91	0.97	0.86	0.93	0.8	1	0	0
CTATGTCTTAAAAGTGACGAAACTTCAAATGTGCCAAGTGTTGAATCACATCAAAATCATTTTTATTTAA	hypothetical protein	SA0471	COL	1	0	0	0	0.16	0.1568	0_tan	0	0.87	0.93	0.8	0.98	0.62	0.98	1	1	0.94	1	0.88	0	0
CTATTAAAGAAATAGAAGAAAGAACATTCCCAAATAATGAAGAAGAATTCAATGCAATTTTAACTTTATC	conserved hypothetical protein	SA1350	COL	0	0	0	0	0.17	0.7889	0_tan	0.013	0.91	0.93	0.87	0.97	0.71	1	1	1	1	1	0.8	0	0
CTATTAATTCATTGCTATCATTAATGTCAATTGAAGGTATTATTGTACTTGTTATATATCATGGTCATAG	conserved hypothetical protein	SA1811	COL	0	0	0	0	0.04	0.3538	0_tan	0.0004	0.93	0.97	0.9	1	0.82	1	1	1	1	1	1	0	0
CTATTAGTTACTAAAAAGAATGATGTATCAGAAACAGTTAATACAGATAATAAAGACACTGTTAAACAAA	putative membrane protein	SAR1816	MRSA252	0	0	0	0	0.47	1	0_tan	0.0028	0.79	0.78	0.7	0.93	1	0.25	1	0	0.5	0	1	0	0
CTATTATAATAATGCATTAGCTATCAAAAGATTTTTTATAGCTTTAGATAAAATTATTGACTTCAACAGA	conserved hypothetical protein	SA0440	COL	0	0	0	0	0.25	0.1092	0_tan	0.0389	0.83	0.92	0.82	0.93	0.36	0.98	0.97	1	1	1	0.56	0	0
CTATTATTAGCATGACATCACTTCAACCATCACAATATATCATTGCTGTTGTTATTGGGTTTGTCATTTG	putative transport protein	SAR0271	MRSA252	0	0	0	0	0.11	0.1843	0_tan	0.0006	0.86	0.92	0.82	0.97	1	0.7	1	0.85	0.64	1	1	0	0
CTATTGTAAGGTCGAAAAACATTAAAACAGATCATTGGCTACCTGTCACGTTTACTATTAGTAAGAAAGA	pathogenicity island protein	SA0898	COL	1	0	0	0	0.29	0.0449	0_tan	0	0.42	0.58	0.19	0.88	0.33	0.23	0.93	0.58	0.88	0.5	0.73	0	0
CTCACTACTGTGGAGTATGGGCAATCGTAAATCCAATAGCCGGCGGTGTATGTGAAGCAGTTTGCGGAAC	hypothetical protein	SAP003	N315	0	0	0	0	0.5	0.1041	0_tan	0	0.39	0.54	0.19	0.91	0.29	0.29	0.88	0.6	0.38	0.6	1	0	0
CTCATATGAATATCCAGAATAACGACTTTAAACAAGTCAATATCAAAAAGTTATTGGAGGCAAGGCAATG	hypothetical protein	SA1832	N315	1	0	0	0	0.26	0.4508	0_tan	0	0.78	0.83	0.63	0.99	1	0.39	0.96	0.73	0.69	0.71	0.93	0	0
CTCATTTGAGTTTGATTCACAAGAAGATTTTCTAAGAATAATTGAACAATTAAATCGTAGGTATGGTAAA	hypothetical protein, similar to transcription terminator	MW0336	MW2	0	0	0	0	0.15	0.0284	0_tan	0.0068	0.93	0.99	0.92	1	0.81	1	1	1	1	1	1	0	0
CTCCAATTGCTCTTGATGAAAAGGCGACGTCACTGTCGGCCATAATTAATTTGATAAAATTATACAATGT	hypothetical protein	SAR1876	MRSA252	0	0	0	0	0.21	0.444	0_tan	0.0004	0.8	0.85	0.74	0.94	1	0.52	1	0.67	0.5	1	1	0	0
CTCCGGTATTGTCCATTGGAATTGGCCAAATAACGATAGAAAGGTATGGGTTCATATATGCGAAATATAG	conserved hypothetical protein	SAV0780	Mu50	0	0	0	0	0.59	1	0_tan	0.1394	0.06	0.07	0.04	0.13	0.06	0.06	0.14	0.14	0	0	0	0	0
CTCCTAATATTAGAAATTCAGAAGAAAAACAAATTTTAGAAACTAATATATACAATTTAATTAAGAAAAG	hypothetical protein	SAP020	N315	0	0	0	0	0.23	0.8819	0_tan	0.2865	0.56	0.54	0.52	0.61	0.96	0.12	0.44	0.83	0.17	0.8	0.69	0	0
CTCTTGAATCAGAATATCCATATTTTAAAGAAGGACTAGTATTATTTACTTATCTTCATCTAGCGAATGA	alanine dehydrogenase 1	SAR1787	MRSA252	0	0	0	0	0.32	0.7643	0_tan	0.0026	0.93	0.94	0.88	1	1	0.78	1	0.83	0.8	1	1	0	0
CTCTTTGATAGTGACATGGACAATTTGAAACATATGGATTGCGACAATCCTGTTACTGAAATATATTTTA	hypothetical protein	SA1948	COL	0	0	0	0	0.08	0.4302	0_tan	0.1098	0.96	0.98	0.95	0.99	0.91	1	1	1	1	1	0.95	0	0
CTGAAGAGCTTGAAACATATATAAAGCAACAGGATTTGGAATATGAGGAACAGAAGCAACTAACTTTATT	hypothetical protein	SAV1978	Mu50	1	0	0	0	0.1	0.4978	0_tan	0.4977	1	0.98	0.98	1	1	0.97	1	1	1	1	1	0	0
CTGAATATTGCGACAGATAAAGATATTGAAACATTAAAAACGAAAGCGCTAGAAATTAATCAAGTATTAA	putative phosphoribosylaminoimidazole-succinocarboxamide synthase	SAR1040	MRSA252	0	0	0	0	0.24	0.8291	0_tan	0.0036	0.86	0.87	0.79	0.94	1	0.59	1	0.73	0.63	0.71	1	0	0
CTGACAATAAACATAAGTCGTTACATCAAATGATTAATCATCAATTTGTGCAATCACCAGCCAAATGTAC	hypothetical protein, similar to cobalamin synthesis related protein CobW	MW2502	MW2	0	0	0	0	0.13	0.6618	0_tan	0.0256	0.97	0.98	0.95	1	1	0.87	1	1	1	1	1	0	0
CTGATGATATATTATCGGTGAATAAGATATTTTATACTGCACCGGCTGAAAAACAAACAAGATTAAGTAA	potential ATP-binding protein	SAR1826	MRSA252	0	0	0	0	0.37	0.4218	0_tan	1	0.82	0.76	0.79	0.79	1	0.46	1	0.56	0.85	0.5	0.63	0	0
CTGATGCTAGGATGAAAGCCAAACAAAAAGTTAACACATTAAGCAAACCGCATCAAAACTATTTCAATAA	hypothetical protein	SA0859	COL	0	0	0	0	0.3	0.1414	0_tan	0	0.57	0.69	0.28	0.96	0.48	0.26	0.92	0.7	1	1	0.93	0	0
CTGCCGTTCCATTAGCAGTAACTAAATTTCGATCTTTTTCTGTAATAATTCAACAAATTTATGCTTTAAC	hypothetical protein	SA0056	COL	0	0	0	1	0.36	0.0013	3_red	0	0.16	0.4	0	0.88	0.15	0.1	0.71	0.58	0.2	0.5	0.8	1	0
CTGCGAGGCTGTCGGCAGTGCCGACCAAAACCATAAAACCTTTAAGACCTTTCTTTTTTTTACGAGAAAA	hypothetical protein	SA0030	N315	0	0	0	1	0.33	0.5923	0_tan	0.3077	0.99	0.97	0.97	1	1	0.98	1	0.86	0.9	1	1	0	0
CTGGCAATTGATACCCTTTTTGCCCTTCACTCGATAAATATATCTCAACAACATAGAAATATTACAGTCG	truncated amidase	SA1757	N315	1	0	0	0	0.07	0.615	0_tan	0.6055	0.98	0.99	0.99	0.98	0.97	1	1	1	1	0.8	1	0	0
CTGGTGTTATTGGAGAATATTTGCCAATGGATAAAATTAAAACTGGTACAGAACATATTAATGATGCTAA	putative arginine biosynthesis bifunctional protein	SAR0184	MRSA252	0	0	0	0	0.26	0.5266	0_tan	0.0004	0.83	0.87	0.77	0.96	1	0.6	1	0.75	0.75	0.71	0.94	0	0
CTGTATCGACTTATTGGCATGATGCACATAAATGGAATGATAGAGCTAAAGCTGAGGGTTATAAAGTTGA	traG protein, putative	SA1576	COL	0	0	0	0	0.28	0.7202	0_tan	0	0.74	0.78	0.63	0.93	1	0.21	0.86	0.67	1	0.6	0.8	0	0
CTGTATCTCATTTCAAAGGAGTCTCATATTAAAACGTCTGTTACGGAGTTTGATTTAAACAAAGTCAAAA	conserved hypothetical protein	SA0191	N315	0	0	0	0	0.34	0.7338	0_tan	0.729	0.7	0.66	0.66	0.7	0.4	0.98	0.89	0.44	0.1	0.29	0.36	0	0
CTGTCATAACAAAATTCATGCAAATGATAATGACAAAAGTAATATTAAGAGAATTAGAGTTATAAAAATT	hypothetical protein	MW1403	MW2	1	0	0	0	0.27	0.365	0_tan	0	0.44	0.52	0.28	0.75	0.29	0.41	0.8	0.7	0.7	0.7	0.59	0	0
CTGTGCATATTATACATTTAGAGCTTATATACTTAAACATGATGAATTTACTCCTTATATTATGAAATGT	ORFID:SAS069~hypothetical protein, similar to transposase for IS232	SAS069	N315	0	0	0	0	0.38	0.2123	0_tan	1	0.99	0.94	0.96	0.96	1	1	1	1	0	1	0.4	0	0
CTGTGCATCCAGATGGTACAGATGAACCAATACTTTATTTAGAAGGATTTAATTTCGATAATGGTAAAGC	putative bifunctional protein	SAR2393	MRSA252	0	0	0	0	0.17	1	0_tan	0.0604	0.83	0.82	0.78	0.88	1	0.6	0.92	0.58	0.58	0.75	1	0	0
CTGTGTTAGTTATCTTATTATTGATTCCATCTATCATCGTTCTCAGTGGGCAATTTGATGCGCTTGGTAA	putative membrane protein	SAR2649	MRSA252	0	0	0	0	0.22	0.7422	0_tan	0.3131	0.72	0.74	0.7	0.78	1	0.48	0.88	0.45	0.6	0.71	0.5	0	0
CTGTTCCAGTAAATATAAAGCTCTTATTTAACGAAGCAATAAAAGAAAATATACTAATACACCCAGGAGA	putative transcriptional regulator	SAR2593	MRSA252	0	0	0	0	0.35	0.5217	0_tan	0.6219	0.55	0.49	0.54	0.49	1	0.09	0.29	0	0.1	0.17	0.11	0	0
CTGTTGTTAATGCATTAAAAGAAAACGGTGCGAAAACGGTCGGTATACGATTTGAAACATTGCCGGAAGA	ATP-binding protein, Mrp/Nbp35 family	SA2156	COL	0	0	0	0	0.08	0.7961	0_tan	0.5991	0.93	0.94	0.92	0.94	0.82	1	1	1	1	1	0.75	0	0
CTGTTTGCCAGACCCGTCGTCTAAATAGTCGGATAGATAAAGTAAGATATATGTTCAATAAAATAACTTA	tetracycline resistance protein	SAV0398	Mu50	0	0	0	0	0.33	0.7556	0_tan	0.176	0.06	0.08	0.09	0.02	0	0.02	0	0.2	0.62	0	0	0	0
CTTAAATTAATTTCACCAACATTCGAAGATATTAAAACATGGTATCAATTGAAAGAATATAGTAAAGAAG	hypothetical protein	MW1383	MW2	1	0	0	0	0.29	0.5574	0_tan	0.068	0.94	0.91	0.89	0.97	1	0.8	0.89	1	0.92	1	0.92	0	0
CTTACATATAGAGAAAGTCATTTTGCGCTGGAATTATTACATCAGTCTCAGTCAGTTACTTCAATGGACT	arginase	SAR2255	MRSA252	0	0	0	0	0.2	0.8467	0_tan	0.334	0.82	0.84	0.81	0.86	1	0.65	0.84	0.73	0.53	0.67	1	0	0
CTTATCTTTTTTGTATTCGGCGCATTTATATTTGTGATGATTGTACTACAATTCTTTGTCAGTAGTGAAA	putative oligopeptide transport system permease	SAR1394	MRSA252	0	0	0	0	0.21	0.7543	0_tan	0.105	0.95	0.94	0.92	0.98	1	0.89	0.96	0.92	0.93	1	0.71	0	0
CTTATGTAGATGATCAAGGTGGAGAGGTCATTTTTAATTATACAAAACCTGAAAGTGAAGATTTGAATTA	hypothetical protein	MW0276	MW2	0	0	0	0	0.28	0.0014	3_red	0	0.35	0.6	0.16	0.93	0.24	0.15	0.96	1	0.55	0.75	0.93	1	0
CTTATTGAAATCGATGTATGAAGAGACAAAGCAAAACGACCCGATTGTAGCAAATGTCTATATAGAAACT	hypothetical protein	SA0344	COL	1	0	0	0	0.35	0.0355	0_tan	0	0.4	0.57	0.04	0.96	0.33	0.18	0.96	0.58	0.55	1	0.92	0	0
CTTCAATTTCACAAAAATAATTCCCGCTGAAAGTATCTATATTTACACATTACTTCCACCATTATATAAC	hypothetical protein	SA1886	COL	0	0	0	0	0.08	0.4886	0_tan	1	1	0.99	1	0.99	1	1	1	1	1	1	0.94	0	0
CTTCTATGTCTAAAATCACTTTAACTCCAATACAAATTATTAACATGATGACTCGATTACAAAGTGCAAG	FdhD protein homolog~ORFID:SA2075	SA2075	N315	0	0	0	0	0.01	0.4726	0_tan	1	0.99	1	0.99	1	0.99	1	1	1	1	1	1	0	0
CTTGAAGGTATGTATGTTACACGAGAACAGCAAATACAAATTCTTCATGCAATTAATAATGAGAAAGAAA	hypothetical protein	SAR0090	MRSA252	0	0	0	0	0.28	0.7013	0_tan	0	0.78	0.82	0.62	0.99	1	0.28	1	0.75	0.5	0.67	1	0	0
CTTGTATTATATAATGAATAATATCTTAGTGCAAGCACCTAAATCATTAAATAAATGTAAAGCTAAATAA	hypothetical protein	SAR0710	MRSA252	0	0	0	0	0.29	0.8601	0_tan	0	0.76	0.74	0.58	0.99	1	0.25	0.9	0.67	0.4	0.83	0.87	0	0
CTTGTCTTTGATCGCCAAACATTATCAATCCCACCCTTATATTTATTTATCTTTAATATATAACAACATT	hypothetical protein	SAP030	N315	0	0	0	0	0.19	0.8405	0_tan	0.0004	0.85	0.86	0.76	0.95	0.99	0.46	0.93	1	0.75	1	0.95	0	0
CTTGTTGTGCTATTCACATTCCTTTTCTTACTTGGGTATTTTTTACCAATAGGTATAGACAAAGTTAAAA	conserved hypothetical protein	SA2538	COL	0	0	0	0	0.2	0.0902	0_tan	0	0.82	0.91	0.76	0.98	0.26	0.98	1	1	1	1	1	0	0
CTTGTTTATTTGGAAGTAGTAGAAAAGATGGCAATTCAGCTATCGCAGTAGAGAATCTATTGAAGAATTT	conserved hypothetical protein	MW0063	MW2	0	0	0	0	0.3	0.0281	0_tan	0	0.47	0.65	0.27	0.92	0.31	0.26	0.82	1	0.95	0.4	1	0	0
CTTTAACGATATCGAACGATGTTTATTTTGATTTAGGAAGTCAAAGAGGTTCTGGTGCCAATGCAAATAG	hypothetical phage protein	SAR1502	MRSA252	1	0	0	0	0.42	0.0131	1_yellow	0	0.75	0.55	0.79	0.37	0.96	0.5	0.29	0.44	0.44	0.4	0.17	1	1
CTTTGATCTATTAGAATACATTGATGACTATAGAGTTAAACATGATCTAGAGAAAATTAGTGAAGAGTGA	hypothetical protein	SAV0784	Mu50	1	0	0	0	0.39	0.0265	0_tan	0	0.07	0.2	0.01	0.44	0.1	0.1	0.45	0	0.1	0	0.25	0	0
CTTTGCGAATCTAGAGTCATTAATCAAAACCCTAAATATAGAATTATTAAATACAATAATGAATATTTCA	conserved hypothetical protein	SA0647	COL	0	0	0	0	0.23	0.0033	2_orange	0	0.38	0.59	0.21	0.84	0.17	0	0.88	1	1	1	0.61	1	0
CTTTGTTATTGATATTACATTAGCACATATATATAAGTTTAAACATACAGATTTCAACTATTTACCAAAT	hypothetical protein	SAR0592	MRSA252	0	0	0	0	0.3	0.5056	0_tan	0.1624	1	0.98	0.97	1	1	0.95	1	0.9	1	1	1	0	0
CTTTTATGCAATCACAAGGTTAATTGGATTATTTGTATTGATTAATGGTGTGATTCAAATTGTTTATCGT	putative membrane protein	SAR2780	MRSA252	0	0	0	0	0.18	0.2574	0_tan	0	0.79	0.86	0.73	0.94	1	0.53	0.96	0.73	0.67	0.75	1	0	0
CTTTTGTAACGATACCGGATAATATTATTTTATCTTTAATAAATAATTTAGATGAATTGTTGAATGGCAA	ORFID:SA0142~hypothetical protein, similar to DNA-binding protein	SA0142	N315	0	0	0	0	0.12	0.3401	0_tan	0.7595	0.97	0.94	0.95	0.96	1	1	0.97	0.83	0.44	1	0.82	0	0
CTTTTTAGGTTTTATATTAAAACAGACAACTTTTCTATGTATTTAATGATTATCTTCTTAATTTGTTTAG	hypothetical protein	MW2134	MW2	0	0	0	0	0.47	0.0076	1_yellow	0	0.2	0.43	0.08	0.8	0.1	0.03	0.69	1	0	1	0.67	1	0
CTTTTTATTTGCTCAAAACATCGCCAAAGCTATTGGGTATGATATTCAAGTTTATACAGAGCAATTAACA	ORFID:SA1760~holin homolog [Bacteriophage phiN315]	SA1760	N315	1	0	0	0	0.08	1	0_tan	1	0.99	0.98	0.98	0.99	0.99	1	1	1	1	0.67	1	0	0
CTTTTTTCATTGTATTTGTGACGATTATCATTCCATCATTAGAATATTATGCATTATATTTAGGTGTGAT	hypothetical protein, similar to ferrichrome ABC transporter (permease)	MW2102	MW2	0	0	0	0	0.24	0.5043	0_tan	0.1839	0.85	0.89	0.84	0.91	0.49	0.98	1	1	1	1	0.56	0	0
GAAAAAAATTATTTTATCAACAACATTGTTACTATTAGGTACAGCATTTACACAATTTCCTAATACACCT	ORFID:SA1010~hypothetical protein, similar to exotoxin 4	SA1010	N315	1	1	0	0	0.22	0.411	0_tan	0.0017	0.83	0.88	0.77	0.94	0.28	0.98	0.97	1	1	1	0.64	0	0
GAAAAAAGCAGCAGTCACAGAATTTAAAAATACCTTTGTACCACAAAATATAAGAGAAACCTTCTTTAAG	hypothetical protein	SAR0287	MRSA252	0	0	0	0	0.38	0.5898	0_tan	0.0029	0.68	0.73	0.61	0.85	1	0.15	0.85	0.67	0.5	0.67	0.44	0	0
GAAAAAAGTTATAAGTTTATTTGTTGCAATTTTATCAGTGTTGATTTTTACGGATAATGCGAACGCCGAA	hypothetical protein	SA2381	N315	0	0	0	0	0.18	0.4502	0_tan	0.1825	0.81	0.85	0.79	0.87	0.56	0.98	0.97	1	0.44	0.75	0.75	0	0
GAAAAAATGTTTGAAGAGCTTATGAATAAAGATGAGGTTCATCCTGAACAAGTATTTGAAAAAATTTATC	capsular polysaccharide biosynthesis protein Cap5D	SA0139	COL	0	0	0	0	0.05	1	0_tan	0.3745	0.94	0.95	0.93	0.96	0.86	1	1	1	0.95	1	0.83	0	0
GAAAAATATAACGAAGCTTTGAGTAGGGATAATGATGTAATAGCTTTATTTGAAACAAAATTAGATTTAG	hypothetical protein	MW1427	MW2	1	0	0	0	0.39	0.1885	0_tan	0.228	0.79	0.69	0.7	0.81	0.96	0.52	0.63	0.75	0.75	0.75	0.6	0	0
GAAAACAAGGACTTTAGCGATAGAGCAAATGAAGAATTAAAGAAGTATAACACTAAGATGTATGTATCTA	hypothetical protein	SAV0888	Mu50	1	0	0	0	0.37	0.7336	0_tan	0.857	0.66	0.62	0.63	0.66	0.6	0.82	0.33	0.33	0.45	0.14	0.73	0	0
GAAAAGAAATTCTACAAGCAATGCAAGTTGGGAGCGGAGCCCCAATTGGATTTCCAATTTCTACAAGTAA	hypothetical protein	SAR0936	MRSA252	0	0	0	0	0.29	0.7755	0_tan	0.0077	0.91	0.93	0.86	0.98	1	0.66	0.96	0.89	0.91	1	1	0	0
GAAAATCGAAATTTTGAGATTTTTACCAATTCGATTTTTTTCATAGAAATTAAAAAAGCCAACAAGGCTC	hypothetical protein	SAS083	N315	0	0	0	0	0.34	0.6108	0_tan	0.602	0.99	0.97	0.97	0.99	0.94	1	1	1	1	1	0.91	0	0
GAAACAAAAGCGGCAGAGTCTTCTAAAAACTTTGTAAATTTAGATCCTATCAAACCAGGAGCTCAAAAAG	hypothetical protein	SA0394	N315	1	0	0	0	0.32	0.0731	0_tan	0.0008	0.71	0.56	0.73	0.47	0.5	1	0.42	0.22	0.2	0.2	0.33	0	0
GAAACCATTGCTGTCAGATATATTATTGTATTTTTTACGTAAAAACACAGATGATCAACATTATGAGTAA	conserved hypothetical protein	SA0872	N315	0	0	0	0	0.18	0.5995	0_tan	0.1212	0.98	0.99	0.97	1	0.93	1	1	1	1	1	1	0	0
GAAAGAAATCAGGCATTAAGAAATGAAGCTATTAAAATTCATGGAACTACATGTAAAGTATGTGGATTTG	truncated hypothetical protein	MW0046	MW2	0	0	0	1	0.46	0.1444	0_tan	0	0.18	0.3	0.09	0.62	0.14	0.07	0.56	0.63	0.3	0.2	0.7	0	0
GAAAGAATTGATCTCTTTAATTATCTACAAAAACATATATATTCACGAGATGATGTATATTTTGATGAAC	hypothetical protein	SA1777	N315	1	0	0	0	0.16	0.4705	0_tan	1	0.92	0.89	0.9	0.91	0.97	0.97	0.77	0.57	0.73	0.4	1	0	0
GAAATATAAAAAGTTTTGCATTGTACATAAGTATCTTGCTTTTAATAGTTGTTGTAGCAGGTTGTGGCAA	putative lipoprotein	SAR0438	MRSA252	1	0	0	0	0.31	0.0127	1_yellow	0.0288	0.88	0.99	0.89	0.98	1	0.78	1	1	0.86	0.75	1	1	0
GAAATCTTGACTAGTGAATATTTAAGGCCTGAGATTTGTAAAGAATTAAGGGAGAAATTAAAACAGTATC	hypothetical protein	SAR1884	MRSA252	0	0	0	0	0.35	0.872	0_tan	0.5055	0.57	0.55	0.54	0.6	1	0.12	0.38	0.22	0.22	0.22	0.22	0	0
GAAATGAGTATGATACTGTTATCGCTATTAATCTTCTAAACGGGAAAATTCCTCATTGGAATGAAATTTT	hypothetical protein	SAV0413	Mu50	0	0	0	0	0.23	1	0_tan	0.2613	0.04	0.05	0.06	0.01	0.02	0	0	0	0.54	0	0	0	0
GAAATTACAGTTTATGGTAATACATACCCGTTGAAAGACACATGTTTCCAAACTATCAATCGTAATAATC	fructose-bisphosphatase	SA2304	N315	0	0	0	0	0.07	1	0_tan	0.5023	0.9	0.9	0.88	0.92	0.75	1	0.93	1	1	1	0.71	0	0
GAAATTTGGGAAACAAAGACCGATTACGTATATAGCCGATTTCTCTTTGTGGAAGGAAGGGAAACTGGTT	conserved hypothetical protein	SA0347	COL	1	0	0	0	0.22	0.3089	0_tan	0.0205	0.94	0.88	0.86	0.96	0.94	0.86	0.95	0.83	0.93	0.86	0.93	0	0
GAAGCATCAACCAACAAAAGGTGCCATTGTCTACATTCATGGTGGCGGTTTAATGTTTGGAAAGGCCAAT	hypothetical protein	SAR0318	MRSA252	0	0	0	0	0.28	0.5666	0_tan	0.0437	0.91	0.94	0.89	0.97	1	0.77	1	1	0.8	0.86	1	0	0
GAAGCTAAGGAAGCTAGTGACGTTTCAGAAGTTAAAGGCACAGATGTTACAAGTAAAGTTACAGTAGAAA	ORFID:SA2291~fibronectin-binding protein homolog	SA2291	N315	0	1	0	0	0.28	0.7829	0_tan	0.5757	0.91	0.93	0.91	0.94	0.85	1	1	0.88	0.57	0.75	0.91	0	0
GAAGTACGAGGAACAAGTTAAAAGGGATGCAGTTATTAAATTAAGTAGATATAGGAGAGGGATAAACTAA	hypothetical phage protein	SAS0921	MSSA476	1	0	0	0	0.38	1	0_tan	0.0001	0.9	0.9	0.79	0.99	0.98	0.56	1	0.83	1	1	1	0	0
GAATAAAGAAGGAATAAACAATTACATTATCAACTTTACATTAACTAAACAGCAAAAAAAGCCATCTATA	hypothetical protein	SA1258	COL	0	0	0	0	0.23	1	0_tan	0.2098	0.99	0.99	0.98	1	0.95	1	1	1	1	1	1	0	0
GAATAACATATACAAGGACGACTATGTATTGTTTGGCACATTCTATAAAGCTTACAGCGAGTCTACTATT	hypothetical protein	SAV0783	Mu50	1	0	0	0	0.32	0.1182	0_tan	0	0.15	0.26	0.03	0.56	0.1	0.12	0.62	0.14	0.15	0.13	0.75	0	0
GAATAATTGGATCAAAGTGGCACAAATATCTGTTACAGTCATTAACGAAGTGATTGACATCATGAAAGAA	hypothetical protein	SA0039	COL	1	0	0	1	0.36	0.5401	0_tan	0.7552	0.95	0.91	0.92	0.94	0.98	0.93	1	0.88	0.89	0.6	0.8	0	0
GAATAGCATTACATACATTTTTAGTAATGTCTGAATACTATGGTGTAGACTTTCATAAGGTAGTTAAAAA	helix-turn-helix domain protein	VRA0062	Michigan	0	0	0	0	0.39	0.8684	0_tan	0.4864	0.43	0.42	0.4	0.47	0.72	0.22	0.36	0.36	0.17	0.33	0.18	0	0
GAATAGCGAAGGTATGGTACTACATTTTAATAGAAATACGAGGACAGCAACAGGATATTATACTGTAAGA	hypothetical protein	SA0402	N315	1	0	0	0	0.32	0.389	0_tan	0.0231	0.82	0.87	0.79	0.93	0.63	1	1	0.75	0.63	0.75	0.91	0	0
GAATCAGTTGAAAATTATAGTAGTGAATTTGATATTTATGACGATGAACAAGAACTTAAATTAAAAATTT	excisionase	SAV0848	Mu50	1	0	0	0	0.31	0.3642	0_tan	0.0626	0.89	0.84	0.82	0.93	0.95	0.83	0.84	0.8	0.67	0.8	0.85	0	0
GAATCATTATAAGTCACTTAAAGTAACGAGATTTAAAAAGTCGCCAATGGACAGTTATTTTATAGGTGGT	putative exported protein	SAR1889	MRSA252	0	0	0	0	0.22	1	0_tan	0	0.66	0.67	0.52	0.85	1	0.17	0.91	0.3	0.23	1	0.67	0	0
GAATCGATGAAAATTTTCAAAGCTCAAGTAATGCTTAGAAATTTAAAGCTATTAAGCGAGTGGATTGTTA	hypothetical protein	SAVP011	Mu50	0	0	0	0	0.34	0.0027	2_orange	0	0.45	0.7	0.05	1	0.43	0.32	0.97	0.83	0.5	0.86	0.93	1	0
GAATGATGGCTAAACATCAAACGGAAGAGCCAACTGTCGCTCAAATTGAACAATTAAAAGTATTGGTTGC	tagatose 1,6-diphosphate aldolase	SA1994	N315	0	0	0	0	0.4	1	0_tan	1	0	0.01	0	0.01	0	0	0.06	0	0	0	0	0	0
GAATGATTATAAAATTGTTGGAATGAATAATTCACAAGCTACTAATAGGCGATTGGAAAATTTAGATTGT	capsular polysaccharide synthesis enzyme Cap5I	SA0152	N315	0	0	0	0	0.39	0.3234	0_tan	0.4218	0.81	0.74	0.75	0.81	0.29	0.98	0.95	0	0.95	0	0.44	0	0
GAATGTGTTTAACTACACTATAGATGACCATTTTCACGAAAAAACTGACAAGCCTATTATTCGCATATAT	hypothetical protein	MW1899	MW2	1	0	0	0	0.4	0.0304	0_tan	0	0.22	0.4	0.15	0.65	0.13	0.1	0.85	0.92	0.54	0.2	0.36	0	0
GAATTCAGTTTTACATTAGATCCTTGTTCAACAGACGAGAACGCCAAATGCCGGAAGTATTATACAGTAA	phage N-6-adenine-methyltransferase	SA0346	COL	1	0	0	0	0.43	0.0171	1_yellow	0	0.05	0.19	0.03	0.45	0.2	0	0.4	0	0.15	0	0.33	1	0
GAATTGGGTAAGATGACACGCGAAAAAAATTATCGTGTTGAACTTAAAAATAATAAGATAGTAGTTTTAG	hypothetical protein	MW0399	MW2	1	0	0	0	0.29	0.0365	0_tan	0	0.27	0.44	0.13	0.7	0.15	0.1	0.6	1	0	1	0.36	0	0
GAATTTTGGGTCATTTGTGTATATGTACTATGCAATTAAGAGCTTGTGGGTGAAGCCTAAGTTAGTAAAT	putative membrane protein	SAR0291	MRSA252	0	0	0	0	0.21	0.1695	0_tan	0.0001	0.8	0.88	0.73	0.95	1	0.57	0.96	0.92	0.71	0.78	0.75	0	0
GACAAACTAGAAGAAGTGAGAAAAAGCTATTACCCAATTAAACGTGCGATTGACTTAATTTTAAGCATTG	capsular polysaccharide biosynthesis glycosyltransferase, putative	SA0114	COL	0	0	0	0	0.1	1	0_tan	0.005	0.94	0.93	0.89	0.98	0.79	1	0.97	1	0.94	1	0.9	0	0
GACAAAGTAGATGAACCATTTATAAATCAACAACATTTGGATGAATTAGAACAGTTAAGAGCGCATATTG	alpha-acetolactate synthase	MW2132	MW2	0	0	0	0	0.33	1	0_tan	0	0.94	0.93	0.83	1	0.98	0.65	1	1	0.78	1	1	0	0
GACAACGGCAATCAGTGGTTGTCTCGTTACGTTATTTGGTTATTGGCTCCATAAACGTGATAAAAAATAA	putative membrane protein	SAR0706	MRSA252	0	0	0	0	0.22	0.4796	0_tan	0.0001	0.87	0.91	0.8	0.98	1	0.53	0.97	0.94	0.8	1	1	0	0
GACAATTTAGAACTTATTAATATGTTTTTGGATGGGCTTAAATGTGAATTCGAACAAACTAATCAATCAT	hypothetical protein	SAR1306	MRSA252	0	0	0	0	0.35	0.8673	0_tan	0.0001	0.66	0.64	0.52	0.84	1	0.14	0.8	0.5	0.18	0.29	0.7	0	0
GACAGAAATAATCATGCAACGTATTGATGAGGTGCGCGTGGATGAAATGCAACAAGTCGGTGTTGTCGTT	conserved hypothetical protein	SAR2490	MRSA252	0	0	0	0	0.08	0.6313	0_tan	0.1224	0.01	0.02	0	0.04	0.02	0	0.06	0	0	0.08	0	0	0
GACATACTACCTGATATTAAAGCTGCTTTTTCAGGTGAAAGTCAGGTGTTGGAATCTGGAAAAGACCCAC	conserved hypothetical protein	SAR1442	MRSA252	0	0	0	0	0.27	0.275	0_tan	0	0.74	0.82	0.66	0.93	1	0.37	0.94	0.5	0.5	0.57	1	0	0
GACATCAAAGGCTTGAAAATATGGGTATTTGCAGTCGATGAAGGTAATGAAATCAGATGTCGATTACGTT	DHH subfamily 1 protein	SA1751	COL	0	0	0	0	0.29	0.0292	0_tan	0	0.47	0.65	0.33	0.88	0.34	0.24	0.96	1	1	0.4	0.7	0	0
GACATGATGGTATGAAACAAGGATTTGATATTGAGCATCTTGCAAAAATAAAATCCCTTGTAAATATTCC	cyclase-like protein hisF	SA2465	N315	0	0	0	0	0.19	1	0_tan	0.0242	0.98	0.98	1	0.95	1	1	1	0.8	0.88	0.6	1	0	0
GACATGTTGAAATTGTTGAGAGCGCTAATCTAAACACTTTCACATCGTTTGGCCAAAATTGGAATGGTAA	truncated amidase	MW1380	MW2	1	0	0	0	0.2	0.0124	1_yellow	0.0002	0.9	0.76	0.92	0.71	0.98	0.8	0.57	0.62	0.81	0.89	0.71	1	1
GACATTCAACATCATGACAATGATAATAACAAAGCCATTCAAAATGATACACCAGATCAAAAAGCCGTTG	hypothetical protein	SA1619	N315	0	0	0	0	0.08	0.4566	0_tan	0.4749	0.99	1	0.99	1	0.98	1	1	1	1	1	1	0	0
GACCAAAAAGAAGCCATGTGTTTCTCATTAAGTCAAAGTGATTCAGAAGATCCCAGAAAAAAATATTGTT	hypothetical protein	SAV0404	Mu50	0	0	0	0	0.39	1	0_tan	0.1918	0.05	0.04	0.06	0	0	0	0	0	0.54	0	0	0	0
GACGATTTAAACACTGAAATAAGTACCAAAATTGCTGATGCTCATGTTAAAAATAGTACAAACTTTTTAG	hypothetical protein	SA0061	N315	0	0	0	1	0.47	0.0114	1_yellow	0	0.87	0.68	0.93	0.1	0.96	0.94	0.2	0.25	0.17	0	0	1	0
GACGATTTTTACTCAATTGAGTGATAGAATCAAAAAAGCCATCTCAAAAATTAATCAAGCAAACAACATT	hypothetical protein	SA1527	COL	0	0	0	0	0.4	0.5113	0_tan	0	0.79	0.84	0.59	1	0.98	0.27	0.95	1	1	0.8	0.92	0	0
GACGCACCAATTTAGTGCATCAGGTCAAAACAGAAATATGATCATTATCAACGAATCAGGATTATACAGT	prophage L54a, antirepressor, putative	SA0325	COL	1	0	0	0	0.33	0.7437	0_tan	0	0.6	0.64	0.48	0.83	0.6	0.56	0.86	0.56	0.5	0.63	0.92	0	0
GACTATATCAATGATAATATAATCTATGGTAGTGAAATCAAACGGGAGAAATTAGAGAATTTATTTAATC	conserved hypothetical protein	SA0027	COL	0	0	0	1	0.32	0.0038	2_orange	0	0.97	0.83	0.97	0.71	0.96	1	0.73	0.88	0.85	0.33	0.67	1	0
GACTATGATTTATTTACTCAATCTGAAAAGGCGCCACCATATGAAAGGGAAAGACCAGTAGCCAAACTAT	hypothetical protein	SA1778	N315	1	0	0	0	0.06	0.3467	0_tan	0.1219	0.97	0.99	0.96	1	0.99	1	1	0.93	0.88	1	1	0	0
GACTATGGATCAATAAGTAAGGGTGAAGCCTTAAAAATGGAAAATATGACAGAATATCAGTTTAGAAATA	hypothetical protein	MW0043	MW2	0	0	0	1	0.26	0.3195	0_tan	0.494	0.03	0.07	0.06	0.03	0.04	0.02	0	0.29	0.1	0	0.1	0	0
GACTTATTACAATCCGAATAACAATAAAAAGCAATATCAAATACTTACGCCAAAAACTGAAAGCTCAATC	ORFID:SA1835~hypothetical protein, similar to integrase [Pathogenicity isla	SA1835	N315	1	0	0	0	0.41	0.1032	0_tan	1	0.75	0.61	0.68	0.67	0.97	0.23	0.92	0	0.44	0.17	0.4	0	0
GAGAAACTAAGTCAAATGTACAATAAAATTGCAAGTGAGATCAGTGGAATGATACCAGTAGAATGGGAGC	conserved hypothetical protein	SA0292	COL	0	0	0	0	0.3	0.1064	0_tan	0	0.8	0.9	0.62	1	0.62	0.81	1	0.94	0.95	1	1	0	0
GAGAAAGTGGTAGTGGTAAATCAATCACTTGTAAATCGATTATTGGTTTGAATCCCGAACGACTCGGGGT	peptide ABC transporter, ATP-binding protein	SA2473	COL	0	0	0	0	0.1	0.4884	0_tan	1	0.99	1	0.99	1	0.98	1	1	1	1	1	1	0	0
GAGATATTGCTTTGCGAGGTTAGAGTTGTAAACAAAAATCCCAGATATAGAATTATTAAATATAAAAACG	conserved hypothetical protein	SA0645	COL	0	0	0	0	0.4	0.0177	1_yellow	0	0.44	0.65	0.21	0.94	0.37	0.19	0.84	0.91	1	0.8	0.83	1	0
GAGATATTTAAATAGAGTTGTACTGTACATAATTGTTATGGTTTTGAGTGTTTTTATAATAGGTTGTGAT	putative lipoprotein	SAR0443	MRSA252	1	0	0	0	0.26	0.4991	0_tan	1	1	0.98	0.99	0.99	1	1	1	1	1	1	0.71	0	0
GAGCAATTTAAGTTAAGCTATTTATTTATCGCGCATGATTTAAGTGTAGTGAAACATATTAGTGATGTAA	ORFID:SA0852~oligopeptide transport system ATP-binding protein AppF homolog	SA0852	N315	0	0	0	0	0.2	0.4973	0_tan	0.2667	0.97	0.95	0.97	0.93	0.98	1	1	1	0.91	0.17	1	0	0
GAGCAATTTGGTCAATATCATTTCTGCAGATTACTTTAACATTAGTTTCTCTCAATATCTTAGTAGAATG	arsenical pump membrane protein 2	SAR1856	MRSA252	0	0	0	0	0.18	0.4883	0_tan	0.1151	0.76	0.81	0.74	0.84	1	0.53	0.84	0.7	0.54	0.56	1	0	0
GAGGAGGTACAGCAAACTCTCCGGCACGACTTATGCCTGATAAAATACTCGATTTAAGATATAAATTACG	cell wall surface anchor family protein	SA1806	COL	0	0	1	0	0.3	0.0305	0_tan	0	0.43	0.6	0.3	0.77	0.34	0.14	0.76	0.21	1	1	1	0	0
GAGTCGATTTATTTCATGCGTAATTTTGATATTCGCACTTATACTAGTTCTTTTTACACCCAACGTATTA	ENTEROTOXIN TYPE C PRECURSOR	MW0759	MW2	1	1	0	0	0.36	0.2749	0_tan	0.0001	0.13	0.2	0.08	0.35	0.02	0.06	0.55	0.44	0.22	0	0.64	0	0
GAGTTAACATCAGCAAATAAGGTAAGTGCTCTTTCCAACCCCAAGGATGGTTTTTTAAAGAAGTTTTTAT	hypothetical protein	SAV1995	Mu50	1	0	0	0	0.21	0.0087	1_yellow	0	0.43	0.63	0.23	0.92	0.34	0.31	0.88	0.94	0.71	0.88	0.77	1	0
GAGTTAAGACCTGTAAATTGTATTAATATACTACCGGAACACCATAAATATATAGACTGGATAAAGTATC	hypothetical protein	SAR0982	MRSA252	0	0	0	0	0.3	0.7394	0_tan	0.0001	0.68	0.7	0.56	0.84	1	0.09	0.96	0.3	0.36	0.43	0.6	0	0
GATAAAAAGTTCAACAGAAGATAAAGTTATGGCAAATGGTCAAGTTATAAATGAACGTACAATTCGCTAT	ORFID:SA2290~fibronectin-binding protein homolog	SA2290	N315	0	1	0	0	0.19	0.868	0_tan	0.067	0.74	0.76	0.7	0.82	0.47	0.97	0.86	0.57	0.42	1	0.71	0	0
GATAAAAATAGAAAATTCACAAGAGTACAGATATTTGGTAAAGATATTGAAAGATTTAAAGCACGCAAAA	exotoxin 10	SA0386	N315	1	1	0	0	0.13	0.6754	0_tan	0.0013	0.86	0.89	0.8	0.95	0.6	0.98	0.97	0.94	1	1	0.76	0	0
GATAAAAGCAACACAGGCAATCGTATGTTTAAGCGTTATGCAGTCATTACAACATCTGCAAAAATATTAG	hypothetical protein	SA0059	N315	0	0	0	1	0.38	0.016	1_yellow	0	0.9	0.74	0.99	0.23	0.9	0.93	0.2	0.86	0.9	0	0.56	1	0
GATAAAATTATAACATGGTGTCTTTTTAGCAATTCAAGCACTTTCTGCTTAATTAAATTTTTAGATGTAC	hypothetical protein	SA2065	COL	0	0	0	0	0.12	0.4976	0_tan	0.4502	0.99	1	0.99	1	0.98	1	1	1	1	1	1	0	0
GATAAAGAAGGTTATCGTGATGACGAATTTGATAAAAATGATAAAGGTACATGGATTATTGGTTCTGAAA	Staphylococcal tandem lipoprotein	SA0083	COL	0	0	0	0	0.29	0.2112	0_tan	0.4025	0.99	0.94	0.95	0.99	1	1	0.96	0.75	1	1	0.6	0	0
GATAAGTAATGAAGTAGGTACGGGTATTGGTTTAGTAGTATTGGTTGTTGGTATTGTAAAATGGGCTAGT	conserved hypothetical protein	SA1581	COL	0	0	0	0	0.21	0.0929	0_tan	0.0005	0.86	0.94	0.83	0.98	1	0.71	0.92	1	0.93	0.86	0.92	0	0
GATAATCATTGGCAAGATGATTGGCGTACCATTTTTGTCGATAAACGTTTGGATCATTTGAAAGAAGAGT	conserved hypothetical protein	SA2374	N315	0	0	0	0	0.3	0.4731	0_tan	0.3174	1	0.99	1	0.98	1	1	0.92	1	1	1	1	0	0
GATACAAAAAAATCTAAAATCAAAGTAACTTACCAAAGAGAAATGGATAGATATACTAATCAATGGAATC	leukotoxin LukD	SA1880	COL	1	1	0	0	0.18	0.2388	0_tan	0.0181	0.87	0.92	0.85	0.95	0.59	1	0.96	1	1	1	0.79	0	0
GATACAAATAAAGGAAGAAATTATGGTAATAAGTCAAAATTTAGTTCTGGATTTAATGCAGGAAAAATAT	enterotoxin SEM	SA1647	N315	1	1	0	0	0.28	0.5818	0_tan	0.0004	0.76	0.8	0.67	0.9	0.51	0.98	1	0.43	0.11	0.44	1	0	0
GATACAGCAAACTTCCACGAACCTTCATTGATTAACTCTATTGAGACATTTGGTAAGGATAAATTTATGA	putative hydratase	SAR0092	MRSA252	0	0	0	0	0.3	0.8696	0_tan	0.3129	0.69	0.67	0.65	0.73	1	0.36	0.79	0.22	0.5	0.4	0.5	0	0
GATACGAAAACGGTAGCAGAAAAATACCTATGGAGGATATAGCTGAAATTGCCAATGCATTGAAAGTTAC	phage repressor	MW1436	MW2	1	0	0	0	0.41	0.0165	1_yellow	0	0.3	0.5	0.17	0.82	0.33	0.23	0.69	0.73	0.5	0.43	0.73	1	0
GATACGACGGCTATGGATACAACGGTAACAGAAATTGTTGAAAACGATAGAGAAATAGCAGGACAAATTA	hypothetical protein	SAR0285	MRSA252	0	0	0	0	0.25	0.8048	0_tan	0	0.89	0.91	0.8	0.99	1	0.62	1	0.91	1	1	0.87	0	0
GATACTAAAAAGCAAGTTGAAGATAAAAAGAAAGATAAAGCAAATTACCAAGTTCCATACACAATCACTG	map protein, authentic frameshift	SA2002	COL	0	0	1	0	0.34	0.0581	0_tan	0	0.23	0.38	0.18	0.52	0.22	0.08	0.59	0.22	1	0	0.3	0	0
GATAGTGAAAATCTCGTGTTTTTTGGTTTTGAGGTGTTGTTTGTATTTTATAAAATGGCTTACATATATG	hypothetical protein	SA0661	COL	0	0	0	0	0.13	0.6214	0_tan	0.0779	0.98	0.99	0.97	1	0.95	1	1	1	1	1	1	0	0
GATATATCACAGTTGTTTATACCTCCAGCTAAACACCCAATAAGCACTATTATCGGTTTTGTATCTGATA	traJ protein	VRA0017	Michigan	0	0	0	0	0.44	0.5903	0_tan	1	0.4	0.34	0.37	0.38	0.68	0.16	0.2	0.33	0.2	0.14	0.22	0	0
GATATCACTTTAAAAGAACTTATTGAGGCTTCAATGACATATAGTGATAATACAGCAAACAATAAAATTA	beta-lactamase	SAP010	N315	0	0	0	0	0.1	0.4466	0_tan	1	0.98	0.95	0.96	0.97	1	0.93	0.93	0.94	1	1	1	0	0
GATATTTAAGAAAAGCTGAACAATATAAGCGATTAGAATTTAATTTAAGTATTGCACTAGATGATGTTGA	hypothetical protein	SA0277	N315	0	0	0	0	0.23	0.7821	0_tan	0.0044	0.91	0.93	0.87	0.98	0.7	1	1	1	0.94	0.67	1	0	0
GATATTTTCATTCCTAAAGGTCAAAGTTTAGGCGCAGTCGATGGTCATAAGGTACTTGTACAAATTACTA	exoribonuclease, VacB/RNase II family	SA0846	COL	0	0	0	0	0.38	1	0_tan	0.4113	0.91	0.9	0.89	0.93	1	0.66	0.93	0.67	1	1	1	0	0
GATCAACAGTTGATGAAAATCATATCAACCTATCAACACAAACCCATTTTAGGTATATGTTTAGGGGCTC	anthranilate synthase component II	MW1255	MW2	0	0	0	0	0.15	0.7273	0_tan	0.4831	0.97	0.95	0.95	0.97	0.85	1	1	1	1	1	0.87	0	0
GATCAAGCAGTTAATATTCCACATGGTAAATTATTAAATGAAAATATTCCTTTTAATAAAGAGGATAAAA	conserved hypothetical protein	SA0083	N315	0	0	0	0	0.31	0.4871	0_tan	0.4851	0.76	0.7	0.75	0.7	0.16	1	0.71	1	0.95	0	0.3	0	0
GATCAGTTACAAGAGTTATTACAAATACAAAAGAAGTTCGACGATAGAATACCGACTAGAAATTTAAATG	hypothetical protein	SA1784	N315	1	0	0	0	0.04	0.4934	0_tan	0.4716	0.99	1	1	0.99	1	0.98	1	1	1	1	1	0	0
GATCATGTTAAAGAAGCACAAAGCTTAATTAACGATTATAAAGATACACAAAGCTATGAAGATCTCGCTA	ORFID:SA0745~hypothetical protein, similar to extracellular matrix and	SA0745	N315	0	0	0	0	0.28	0.8254	0_tan	0.2593	0.88	0.86	0.84	0.91	0.67	1	1	1	0.7	0.67	0.67	0	0
GATCCAGTATCTACCGTAGATATTGTTATAGGAAGAGTTGCCCAAGTTCATATTGACGATAAGGTTATTC	conserved hypothetical protein	SA2678	COL	0	0	0	0	0	1	0_tan	0.498	0.99	0.99	0.98	1	0.99	1	1	1	0.95	1	1	0	0
GATGAAATTTTAGCAATTAAATTACCAGCTGAAGCGACGAAAGTATCACCAAAAGAAATTCAGCCAGCTC	cell wall surface anchor family protein	SA1806	COL	0	0	1	0	0.06	0.0957	0_tan	0.1105	0.97	1	0.97	1	0.95	1	1	1	1	1	1	0	0
GATGACACATCGAGCAATCATGTTAGCATCTTTAGCTGAAGGAACTTCCAATATTTATAAACCATTACTT	3-phosphoshikimate 1-carboxyvinyltransferase	SA1297	N315	0	0	0	0	0.27	0.1194	0_tan	0.0001	0.67	0.55	0.73	0.41	0.54	0.98	0.29	0.2	0.2	0.2	0.23	0	0
GATGACTATTAAAGTGCGAAAAACAAATAAAAAAGAGAAAATAGAATTTTTAATAGGGACGTTTATAATT	hypothetical protein	SA1334	COL	0	0	0	0	0.09	0.2497	0_tan	1	1	0.97	0.98	0.99	1	1	1	1	0.95	1	0.75	0	0
GATGACTTTATTCAAAAAATGTTATTAGGCAATATACAAGCTGATGCATTACGTCATTATTTACAAGCTG	transcriptional activator	SAR2183	MRSA252	0	0	0	0	0.14	0.3519	0_tan	0	0.8	0.86	0.71	0.94	1	0.47	0.97	0.77	0.46	1	1	0	0
GATGGTATCGTTATTGGTAGTGAAATAGTAAAACGATTTAAATCTAACACGCGTGAAGAAATCATTAAAT	tryptophan synthase alpha chain	SAR1386	MRSA252	0	0	0	0	0.19	0.7167	0_tan	0.0145	0.96	0.97	0.93	1	1	0.91	1	0.9	0.83	1	1	0	0
GATGTTAAAATTAAAACTATTTCAGGTGGAGTTTATTTTGTAAAAACAGCTGAACCTTTTGAAAAATATG	hypothetical protein	SAV0878	Mu50	1	0	0	0	0.33	0.5623	0_tan	0	0.76	0.81	0.65	0.96	0.65	0.81	0.83	0.89	0.77	1	1	0	0
GATGTTATTTATAGTAATGATAATAAGACGGCGACAGTAGATTTATTGAATGGTCAATCTAGTAGTGATA	Ser-Asp rich fibrinogen-binding, bone sialoprotein-binding protein	SA0519	N315	0	1	1	0	0.21	0.0773	0_tan	0.0005	0.66	0.53	0.7	0.44	0.4	0.98	0.6	0.17	0.33	0.17	0.25	0	0
GATTACAATGTGAAGCAACTTCGAAAAAGATATAATATTCCAACCAACAAAGCTCCGAAACTATTATTGA	hypothetical protein	SA2274	N315	0	0	0	0	0.13	0.436	0_tan	0.034	0.9	0.94	0.88	0.97	0.8	1	0.96	1	0.69	1	1	0	0
GATTACTTCACATACTATTGATAAAGATGGCGTGAAAATTAGTGGCGATAAAGTTGATATAACAGCGAAT	hypothetical protein	SA1764	N315	1	0	0	0	0.28	0.7502	0_tan	0.0001	0.34	0.37	0.25	0.54	0.19	0.46	0.62	0.27	0.23	0	0.55	0	0
GATTATAAATTATATAAAGATGATACGCAAACAACCAATTCCGATAATCAGGAAACCAATTCCCTCTTTT	hyaluronate lyase precursor 2	SAR2292	MRSA252	0	1	0	0	0.39	1	0_tan	0.2284	0.85	0.85	0.82	0.91	1	0.63	0.86	0.83	0.78	0.6	0.89	0	0
GATTATATAAATAATCGATTTACGACAGTAAAATCAATTGTATCAACTACAGAAAAATTCTTAGACTTCG	enterotoxin SeO	SA1648	N315	1	1	0	0	0.29	0.8574	0_tan	0.0269	0.77	0.76	0.7	0.86	0.51	0.98	0.9	0.29	0.2	0.2	1	0	0
GATTATGATTCCATCAGTTTAATAGTAATGTTGTGGTTAACCATTATATTAAATACTTTGATTTGCCAAC	hypothetical protein	SA2249	N315	0	0	0	0	0.29	0.7175	0_tan	0.8531	0.75	0.78	0.77	0.75	0.56	1	0.95	0.29	0.25	1	0.42	0	0
GATTATTGCATAATGCGTTTAATGTAAGAATAGGTTGGTTAATTTTGCGATTACTTGCCGTTGTCTTTGC	putative membrane protein	SAR2265	MRSA252	0	0	0	0	0.2	0.4736	0_tan	0.0001	0.88	0.92	0.83	0.99	1	0.72	1	0.8	0.73	1	1	0	0
GATTCAAAAAGAGTAGTATTGTACATAAGCATTATGGTGTTGAGTATTTTTATAATTGGTTGTGGCAAAG	hypothetical protein	SA0400	N315	1	0	0	0	0.32	0.7253	0_tan	0.854	0.74	0.71	0.72	0.74	0.56	0.98	0.84	0.17	0.25	0.25	0.71	0	0
GATTCAGTGTATGAGTTGTATAAACAATTTCAAAATTTAAGGAATTTATTTAAAGAAGAAGGACATGAAC	conserved hypothetical protein	SA0286	COL	0	0	0	0	0.36	0.5714	0_tan	0	0.89	0.92	0.77	1	0.95	0.77	1	0.92	0.88	0.89	1	0	0
GATTCGCAAAATAGTATTCAATGAAGAGTATGATGAAGACGGTGTTTATAAAGAAACTCAAGGTAAACAA	hypothetical phage protein	SAR2054	MRSA252	1	0	0	0	0.34	0.7361	0_tan	0.1513	0.68	0.65	0.63	0.75	0.97	0.43	0.67	0.2	0.6	0	0.44	0	0
GATTCTTAGACATTGAGGATATTAATCAAGGTATACGAGGACACAAAACTTTGCGTGATATGATGCAACA	glycine betaine/carnitine/choline ABC transporter opuCA	MW2372	MW2	0	0	0	0	0.35	0.1533	0_tan	0	0.22	0.33	0.15	0.54	0.15	0.1	0.44	1	0.33	0	0.4	0	0
GATTGTTAGCTACTGGTGTAATAACAACAGAAAGTCAAACAGTAAAAGCGGCAGAATCAACTCAAGGTCA	exotoxin homolog [Genomic island nu Sa alpha2]	MW0387	MW2	1	1	0	0	0.26	0.0309	0_tan	0	0.51	0.67	0.32	0.88	0.36	0.21	0.78	1	1	1	0.69	0	0
GATTTAAAGGAATCTTTAAAAAGTTTAGGTTGGTGGGATTTATTTTTTGCGATACCTATGTTTCTGCTAT	hypothetical protein	SA0086	N315	0	0	0	0	0.28	0.1023	0_tan	0.0031	0.87	0.95	0.84	0.97	0.63	1	1	1	0.93	0.86	1	0	0
GATTTAAGCGTCCTTAGGGTTTTTGTATTGGATTACAATGGTCATGGCAATTTGATAATGATTGAGATAT	hypothetical protein	SAR0237	MRSA252	0	0	0	0	0.12	1	0_tan	0.2102	0.99	0.99	0.98	1	1	0.96	1	1	1	1	1	0	0
GATTTAATCGTAAGGAAATAATTAATTTCGAAAAAACTATAGGAAAAGCTTATGCAGGTGGAAAATATAT	hypothetical protein	SAR1312	MRSA252	0	0	0	0	0.32	0.5925	0_tan	0.002	0.72	0.76	0.64	0.86	1	0.41	0.79	0.7	0.5	0.33	0.6	0	0
GATTTATGTTACGCACTTTATTGAAGAAATTACTAGTAACTTTACTAAAATTTTGCTATTAAAAGATGGG	hypothetical protein, similar to ABC transporter (ATP-binding protein)	MW2079	MW2	0	0	0	0	0.13	1	0_tan	1	1	0.99	0.99	1	1	1	1	1	0.8	1	1	0	0
GATTTCGATAACGTTTCACAAGCTGGTAGAGAAATCTTAAAAAAAGGATTAGAACAAATTAAAAGTAATA	regulator of transfer gene ArtA	VRA0007	Michigan	0	0	0	0	0.44	0.7243	0_tan	0	0.59	0.63	0.47	0.87	0.76	0.35	0.8	0.71	0.38	0.4	0.82	0	0
GATTTGTCGAAAAAGATATCGATTTTAAAGCAAACGAACCATACAGAAATGAACATTACTGTAGAACAAT	ABC transporter ATP-binding protein	SAR0789	MRSA252	0	0	0	0	0.33	1	0_tan	0.0077	0.71	0.71	0.63	0.83	1	0.21	0.85	0.14	0.27	0.2	1	0	0
GATTTTAAACTGTTGAAAAGAAGAATTTTAGGAATTGGATTCGTTTTACCGGAGGGACAAGTATTTACTT	hypothetical protein	SAS0035	MSSA476	0	0	0	0	0.31	0.0008	3_red	0	0.26	0.52	0.01	0.98	0.25	0.12	0.9	0.69	0.36	0.8	0.79	1	0
GCAAAAGGAAACCAAGGTATTAAATGGTCTAGTTTAATAATGGGTGTATTATTATTAATGTTGGCAGTCG	conserved hypothetical protein	MW2619	MW2	0	0	0	0	0.17	1	0_tan	0.0128	0.96	0.95	0.91	0.99	0.82	1	1	1	0.95	1	0.93	0	0
GCAAAGACTAGAAAAGAATATAGAGATATTTATGTTGGTCAATATTTAGGGTCTATTATTTTAATATTAG	CadD	SAP005	N315	0	0	0	0	0.28	0.0326	0_tan	0	0.68	0.83	0.63	0.92	0.31	0.81	0.89	0.94	0.89	1	0.94	0	0
GCAAAGTTAATTCCAATGGATACCATTCCCGACAATTTAAATGCATTTAACAAAAAAGAGACATACTATA	conserved hypothetical protein	SAR1842	MRSA252	0	0	0	0	0.32	0.3554	0_tan	0.0003	0.85	0.9	0.79	0.97	1	0.46	0.94	0.83	1	1	1	0	0
GCAAATCGTATCAATGTTTTTAAGACCAATGGTTTTTCTAAAAGTTTAGGCGAACATCGAATGACAAGTA	GntR family regulatory protein	SAR0262	MRSA252	0	0	0	0	0.26	0.5603	0_tan	0.0005	0.92	0.95	0.88	1	1	0.74	1	0.9	0.89	1	1	0	0
GCAAGAAGTTCACTTACTTCAATGGCACAAAATGATTCTGAAATGATAAGATATGATGCTATAGATAAAT	hypothetical protein	SA1834	N315	1	0	0	0	0.38	0.741	0_tan	0.3956	0.59	0.55	0.54	0.62	0.97	0.06	0.54	0.14	0.11	0.2	0.55	0	0
GCAAGAGCATCGTATGGCAGATGTCATAGAAGGTACAAACATTGATAAAATTGAAGTGAATATAAAATAA	exotoxin 8	SA0384	N315	1	1	0	0	0.09	0.4191	0_tan	0.0109	0.96	0.98	0.94	1	0.93	0.98	1	1	0.93	1	1	0	0
GCAAGATGTCATGCCGAATATATTTAACGACAGATATACGTCAGCGATTTATAATCCTATAGAAAATTTA	hypothetical protein	SAV0904	Mu50	1	0	0	0	0.25	0.8494	0_tan	0.001	0.8	0.82	0.89	0.69	0.88	0.88	0.47	0.73	0.67	0.75	0.86	0	0
GCAAGGCGTAACGAATAAAGGTAATTTAGATATTAATAGGCAAAGAAAACAGTATAATGAAGTGGCTTTA	conserved hypothetical protein	SAS0044	MSSA476	0	0	0	0	0.46	0.0551	0_tan	0	0.03	0.14	0	0.33	0.09	0	0.43	0	0.13	0	0.25	0	0
GCAATAGTTTTTATGTTATTGAGTGATGAAGAAGAATGGGGAAAGCTTCACAGAAATTCTAGAACAAAAT	replication initiation protein	SAA0001	COL	0	0	0	0	0.48	0.7781	0_tan	0.305	0.13	0.1	0.09	0.18	0.05	0.12	0.33	0.29	0.11	0	0.2	0	0
GCAATGTTATCTTAACCCCATCTTTAAAAGTAATTGAATCAGGTCATTTTCATACAGACTTTTCACTAAT	hypothetical protein	SA2015	N315	0	0	0	0	0.36	0.1041	0_tan	0.0004	0.55	0.41	0.59	0.29	0.08	0.98	0.15	0.13	0.09	0	0.1	0	0
GCAATTTTAACGCTCGTCTTAGCGTTCGGTTTATCGGCATTTGAAACACTGTATTCTTTATATACATCGT	fluoroquinolone resistance protein	SAR0748	MRSA252	0	0	0	0	0.27	0.7096	0_tan	0.0587	0.78	0.81	0.74	0.86	1	0.53	1	0.67	0.55	0.67	0.7	0	0
GCAATTTTTGGACCATCATTAGATGCACACGTTTCAGGAAGTTTCCACTTGTTAGAAAACTTATTAAATG	ORFID:SA0317~hypothetical protein, similar to dihydroflavonol-4-reductase	SA0317	N315	0	0	0	0	0.11	1	0_tan	0.1936	0.99	0.99	1	0.98	1	1	1	1	1	1	0.5	0	0
GCACAAAGTCCAAATTTAAGCAGGGAAATAAACTTAAAATACACGAATATATCATTGCAGTAACTTATGT	hypothetical protein	SA0045	COL	0	0	0	1	0.33	0.2329	0_tan	0.5615	0	0.03	0.02	0	0	0	0	0.17	0	0	0	0	0
GCACAACTTAATTCAAAGATAGCTTCCTTAAAATTATTCGCAAGTTACGCCATAGCAACTTATATTTTAG	peptide ABC transporter, permease protein	SA0186	COL	0	0	0	0	0.52	0.1311	0_tan	0.0046	0.48	0.63	0.47	0.76	0.38	0.47	0.8	0.57	0.95	1	0.71	0	0
GCACACTGACCAATGTAGGTTTTAAATTCAATCAATGGTTAGATTTAGCATTTTACGAATTAGATTTACA	hypothetical protein, similar to N-acetyltransferase	MW2449	MW2	0	0	0	0	0.1	0.3296	0_tan	0.0453	0.97	0.99	0.96	1	1	0.91	1	1	1	1	1	0	0
GCACTATATTGAAGAAGTCGAACGTATGTCAGACAAAATTATTCTCATTGAAAATGGAGAAATAATACTT	ABC transporter, ATP-binding protein	SA1352	COL	0	0	0	0	0.17	0.5079	0_tan	0.74	0.97	0.94	0.95	0.96	0.88	1	1	1	1	1	0.75	0	0
GCACTTGTATTTATAGGATTAATAATTTTTATCTCTGTTGTAATACTTATAATGTCGCTTTTCACCCTTA	accessory gene regulator C	SA1843	N315	0	0	0	0	0.21	0.2137	0_tan	0.0198	0.72	0.63	0.75	0.59	0.5	0.98	0.65	0.08	0.25	1	0.46	0	0
GCACTTTTGACAAATAGAATAAGGGATAAAAAAGATAAAAGGCTAGATATTTTATCTAGTGTATTACTTT	hypothetical protein	MW2607	MW2	0	0	0	0	0.26	0.0005	3_red	0	0.39	0.66	0.12	0.98	0.35	0.23	0.93	1	0.6	0.67	0.92	1	0
GCAGACGTTGATTGGTACGTGAAAGCAGACGATCTTGTATTAAAAGGACAGACAAAACCTCATCAGAAAT	hypothetical protein	SAV0411	Mu50	0	0	0	0	0.4	0.0029	2_orange	0	0.36	0.61	0.15	0.98	0.22	0.29	0.94	0.73	0.86	0.8	0.8	1	0
GCAGCTGAAATTCAAGCATTAAAAGCACAAAATCGATTATTAGAGATGGAAAATGACGTTTTAAAAAAGT	putative insertion element protein	SAR0520	MRSA252	0	0	0	0	0.32	0.8685	0_tan	0.3951	0.67	0.66	0.64	0.71	1	0.36	0.55	0.43	0.38	0.43	0.44	0	0
GCAGGACTTTGCAACAGCTGTACAATATGATCTACCTTTAACAGTGTTTGTTCTAAATAATAAGCAATTA	thiamine pyrophosphate enzyme	SAR2619	MRSA252	0	0	0	0	0.17	0.7056	0_tan	0.0216	0.82	0.85	0.78	0.9	1	0.61	0.96	0.64	0.64	0.67	1	0	0
GCAGTAATGACAAAAGCGATTAAAGATAAAAATAAAGCAGAGCTAGAATCGCTGAACAATAGTTTGAATC	conserved hypothetical protein	MW0321	MW2	0	0	0	0	0.41	0.4461	0_tan	0.0001	0.23	0.29	0.15	0.46	0.12	0.06	0.42	1	0.25	0	0.36	0	0
GCAGTGATGAATTATTTTACTATACAAGTGTGATAAAGAAGTATAATTTATTGAAATCAAGCTTTATGGA	conserved hypothetical protein	SA0289	COL	0	0	0	0	0.32	0.1063	0_tan	0	0.14	0.24	0.08	0.43	0.04	0.02	0.56	0.14	0.88	0	0.18	0	0
GCATAAAGCGAAAAATCTTAAAGATAAAGTCATTAAAGAAAACAAAGTTGAAATCGATGGTGACAGTAAT	zinc metalloproteinase aureolysin	SA2430	N315	0	0	0	0	0.15	0.2665	0_tan	0.0005	0.91	0.95	0.87	0.99	0.68	1	1	1	0.95	1	1	0	0
GCATCTTTATTAATGTCATTGATTATGGGTTTACTATCAGAAAAACGATTAATCTTTAAATTTAGTATTG	conserved hypothetical protein	SA2283	N315	0	0	0	0	0.31	1	0_tan	0.284	0.74	0.74	0.71	0.79	0.14	0.98	0.79	1	0.8	1	0.25	0	0
GCATTATTTCAATCGAAAACGCAGAGCATACGCTTTTTACACCTTATATGTTGGAAACGCTCTCTTCCCT	hypothetical protein	SA1849	COL	1	0	0	0	0.47	0.4182	0_tan	0	0.84	0.89	0.72	1	0.95	0.36	1	1	1	0	1	0	0
GCATTCCGGATGATGGCGTAAAGCCAGCAGATTCTACTCAGAAAAAGGCATACGATATTATTTCAGATAA	putative transport protein	SAR2632	MRSA252	0	0	0	0	0.18	1	0_tan	0.6416	0.69	0.69	0.68	0.71	1	0.48	0.71	0.43	0.5	0.44	0.5	0	0
GCATTCGTAAATAGAAACTATACTGTTAAATACGAGGTCAATTGGAAGACTCATGAAATCAAGGTGAAAG	gamma-hemolysin component C	SA2208	N315	0	1	0	0	0.05	0.0507	0_tan	0.1218	0.96	1	0.97	1	0.93	1	1	1	1	1	1	0	0
GCATTGCGCAAGCATTTAATTGACAAGTATTCTATTGGTGTCATTGCACTTAATGCTACAGATATTCGTA	conserved hypothetical protein	SAR2028	MRSA252	0	0	0	0	0.31	0.7349	0_tan	0.8614	0.69	0.72	0.71	0.69	1	0.46	0.67	0.56	0.6	0.5	0.25	0	0
GCATTTGTTTTCTTGAAAAGTGGCATTCATTTTATTTTATCTATGTTTAATAAAAGCATATCAGATGACA	ORFID:SA2446~hypothetical protein, similar to preprotein translocase secY	SA2446	N315	0	0	0	0	0.07	0.1184	0_tan	1	0.97	1	0.98	0.99	0.95	1	1	1	1	1	1	0	0
GCCAAGCCCATTCAATTACTAGCAATTGTCGTAGCGGGTTATGTTATCACATTAAATTGGGGTACATTTA	putative membrane protein	SAR2776	MRSA252	0	0	0	0	0.15	0.3526	0_tan	0.0537	0.97	0.99	0.96	1	1	0.93	1	1	0.93	1	1	0	0
GCCATTTGATTCACTAGCGGTGTTAATAACTACGGAAATTGCATTTCCGACTGAAATTTTTGAAAAATAT	hypothetical protein	SA1901	COL	0	0	0	0	0.28	1	0_tan	0.0002	0.94	0.94	0.87	1	0.64	1	1	1	1	1	1	0	0
GCCTCTCAAGCAAAAGCATTAGCTGAATCAACAAATAAAGTTGAAAAGAATGCTGTTACTGAAGATAAAG	conserved hypothetical protein	SA0455	COL	0	0	0	0	0.12	0.2363	0_tan	0.0004	0.92	0.96	0.89	1	0.74	1	1	1	1	1	1	0	0
GCGAAAGAGAAGTACGAGGCACAAGTTAAAAGGGATGCAATTATTAAATTAGGTCAGTTGTTTGAAAATA	hypothetical protein	SAV0877	Mu50	1	0	0	0	0.29	1	0_tan	0.0027	0.95	0.95	0.9	1	0.98	0.9	1	0.82	0.93	1	1	0	0
GCGATCATGCAAATTCACCAAATAATGAAAGAATACCTACGCCACATATACACATATATACTGAAGAATA	hypothetical protein	SAR1913	MRSA252	1	0	0	0	0.11	0.4462	0_tan	0.7045	0.98	0.95	0.97	0.96	1	1	1	0.8	0.73	0.75	1	0	0
GCGCAAAAGTAGATATATCGATAAAAAAATCAGTCGGCAAAATCTCATTTGAGTTTGAATCGCAAGATGA	putative DNA-binding protein	SAR0357	MRSA252	0	0	0	0	0.21	0.1648	0_tan	0.0648	0.94	0.98	0.93	0.99	1	0.91	1	1	0.7	0.88	1	0	0
GCGCAAGTTCAGCATTCTTTATTTATATGTTTGCTTTTTGGTTTATTTTTAGTTCTATCTCTGGATTATT	conserved hypothetical protein	SA2723	COL	0	0	0	0	0.33	0.055	0_tan	0	0.77	0.89	0.67	0.98	0.98	0.34	0.96	0.75	1	0.83	1	0	0
GCGCCTAACTATTCAGCTGAATATAAAATTAATGATGATGATAATAACATCAAACAATTAAAAAATCGAT	putative lipoprotein	SAR0445	MRSA252	1	0	0	0	0.29	0.3854	0_tan	0.0139	0.77	0.71	0.67	0.84	1	0.35	0.71	0.38	0.5	0.29	1	0	0
GCGGAATGGTTGCGAGTATGCAAATGCAGGTGGTACAAGTAAACGTATTAACAATGGAATTAGCTCAACA	hypothetical protein	SAV0906	Mu50	1	0	0	0	0.19	0.7677	0_tan	0.0133	0.95	0.93	0.9	0.99	0.95	0.95	0.91	0.92	0.82	1	0.94	0	0
GCGTGAAGGTAAATATCGGGTAGAGAACAATACTGAAATGAAATTAGGTGAAGTTCATTATTCTAAAACT	hypothetical protein	SAR1324	MRSA252	0	0	0	0	0.35	0.7153	0_tan	0.0009	0.73	0.76	0.64	0.87	1	0.26	0.83	0.67	0.45	0.6	0.69	0	0
GCGTTTGTTGAAGCGGCAAAAATTCCGGTCGTTCATTCATTACCTGCTAAGACAATCTTACCGGATGACC	hypothetical protein, similar to pyruvate oxidase	MW2460	MW2	0	0	0	0	0.54	0.4421	0_tan	0	0.51	0.6	0.3	0.91	0.35	0.19	0.94	1	0.44	1	0.91	0	0
GCTAAACTATACTGCTAATACAAATACTGTAGCAACGTTGTTTAGTACGAATGATGAAAGGAATAGAAAA	hypothetical protein	SA1530	COL	0	0	0	0	0.43	0.0887	0_tan	0.0001	0.14	0.27	0.11	0.41	0.02	0.06	0.6	0	0.95	0	0.1	0	0
GCTAAACTATACTGCTAATACTGATGTTGTTTCTACACTTTTTTCTACTAAGAAAAACTTTACTAAAGAC	hypothetical protein	SA1318	N315	0	0	0	0	0.4	0.8464	0_tan	0.4312	0.77	0.76	0.74	0.8	0.18	0.97	0.84	1	0.8	1	0.38	0	0
GCTACAAAAAAATTGAATTTACTTTCGTAGAGAAAAAGGGAGAAAATATATACTTTAGTGATGGGCTACA	hypothetical protein	SA0093	N315	0	0	0	0	0.18	0.5847	0_tan	0.0013	0.92	0.94	0.87	0.99	0.79	1	1	0.85	0.78	1	1	0	0
GCTATCGTTATTTTAATCATCTTTGCATTATTATTTAGATTTATAGTTAAATTAATACCTATTTTCTATA	conserved domain protein	SA0416	COL	0	0	0	0	0.14	0.2951	0_tan	0.0323	0.17	0.23	0.14	0.27	0.1	0.08	0.17	0.21	1	0.11	0.13	0	0
GCTATTTGAGTTGTCTTAAATTGGCTGATCAACAAAGTTTAAATCATATAGCATTTTGCTGTATATCTAC	conserved hypothetical protein	SAR0322	MRSA252	0	0	0	0	0.25	1	0_tan	0.5112	0.99	0.99	0.98	1	1	0.98	1	1	0.92	1	1	0	0
GCTCAAACTACGGCAATTCAAATCCTGAATTGAAAAAAAGAGTTCAAGAGACTATTAAACAAGAAGGAAA	ORFID:SA0071~potassium-transporting ATPase C chain homologue	SA0071	N315	0	0	0	1	0.41	0.0015	3_red	0.0018	0.91	0.69	0.88	0.63	1	0.9	0.63	0.25	0.14	0.2	0.5	1	0
GCTCTTCAAATAAATAATGATTTACCAATAAGTATATCAAGTAAACTAAAGAAATATATTCATAAACCTG	hypothetical protein	SA2558	COL	0	0	0	0	0.35	0.0008	3_red	0	0.22	0.49	0.09	0.87	0.18	0.1	0.81	0.5	1	0.5	0.56	1	0
GCTGATGGTACGCTAGAAATTTACATCGACCATGACGAAAAAACAATAATTACAGAATTCCATGATTTAA	hypothetical protein	SAV1975	Mu50	1	0	0	0	0.44	0.4867	0_tan	0.85	0.52	0.45	0.49	0.47	0.78	0.24	0.33	0.29	0.58	0.17	0.3	0	0
GCTGCTATCATATTTGCAACCGCAAAATTCAAACCATTTAAGAACAGAATTAAAAATAACCCACTAAAAA	hypothetical protein	SAS012	N315	1	0	0	0	0.05	0.4825	0_tan	0.4825	0.99	1	1	0.99	1	1	1	1	1	0.86	1	0	0
GCTGGATAGATTAGATAATCAAATTAATGATTATTATGAAGTGTTTAATTATGTCGTAGTTATTACAAAT	conserved domain protein	SA0181	COL	0	0	0	0	0.28	0.0035	2_orange	0	0.39	0.63	0.16	0.93	0.09	0	1	0.67	0.95	1	1	1	0
GCTTAAGAGAAAATGTTTTACAAGTTATTTCAAGTATAAAAGGTATAGGTTCTTGGACAGTGCAAATGTT	hypothetical protein	SAR0983	MRSA252	0	0	0	0	0.31	1	0_tan	1	0.03	0.03	0.04	0.02	0.27	0	0.05	0	0	0	0	0	0
GCTTCAGCTGTTTTTAATGAAAATAGCATTAAATGATTTTGAAAACGATAAGAGTGTGTTATTTATATTT	hypothetical protein	SA0729	COL	0	0	0	0	0.15	1	0_tan	1	1	0.99	1	0.99	1	1	1	1	1	1	0.93	0	0
GCTTGAAAAAGTTGGGTTAGATAAGTACCAAGCTAGCAGGTTTATCAAAGTTGCAAATGAACAATCAAAA	hypothetical protein	SAR0384	MRSA252	0	0	0	0	0.31	0.8579	0_tan	0.0073	0.76	0.74	0.66	0.84	1	0.31	0.88	0.45	0.79	0.5	0.62	0	0
GCTTGGACAGGAATCAAAGGTTCAGCTATAACTACATTTATTACTGCCTTATATAATGGAAGTAGTGTTT	hypothetical protein	SA0194	N315	0	0	0	0	0.25	0.8455	0_tan	0.4363	0.81	0.83	0.8	0.85	0.68	0.98	0.96	0.92	0.5	0.71	0.6	0	0
GCTTTAAAGAGTGTCGTTACAGGAGTAAAAAGCAAAAATATAACATGGTATTCTAATAGACATCTATTAG	Mur ligase family protein, authentic frameshift	SA0054	COL	0	0	0	1	0.34	0.6217	0_tan	1	0.04	0.01	0.03	0.02	0.04	0.04	0	0	0	0	0	0	0
GCTTTACGAATCTAATATTATTAACAAAAATCCCAGATATAGAATTATTAAATATAAAAACGACTATCTG	conserved hypothetical protein	MW0553	MW2	0	0	0	0	0.24	0.0009	3_red	0	0.31	0.56	0.16	0.83	0.16	0	0.79	1	1	1	0.5	1	0
GCTTTGAAAAAAGAACCCCGTGCAAATACACAAGCAGCGGAACATATTTTACAAGAAATTAGACAACAAT	hydroxymethylglutaryl-CoA reductase, degradative	SA2560	COL	0	0	0	0	0.26	0.0333	0_tan	0	0.68	0.82	0.49	0.98	0.48	0.42	1	1	1	1	1	0	0
GGAAAACCCTCCAATACCTTCAAAAGAACACACAGCGCCCTTAAAAGAGCATACAGAACCTATTAAACGT	conserved domain protein	VRA0061	Michigan	0	0	0	0	0.47	0.8209	0_tan	0.001	0.79	0.83	0.71	0.94	0.92	0.62	1	0.71	0.63	0.33	1	0	0
GGAAACCATTGCTGTCAGATATATTATTGTATTTTTTTAGTAATCAGTCACCGGATCAATTATATGAGTA	conserved hypothetical protein	SAR0981	MRSA252	0	0	0	0	0.27	1	0_tan	0.0329	0.97	0.97	0.94	1	1	0.89	1	0.92	0.92	1	1	0	0
GGAACAAGAGCGTAATGCATTGGAGAGTAAAATAAAGATAGATAAGTCCACATATAAACAGTTAATCATG	hypothetical protein	SA1824	N315	1	0	0	0	0.34	0.3544	0_tan	0.7089	0.79	0.73	0.74	0.78	0.97	0.37	0.81	0.44	0.89	0.5	0.56	0	0
GGAACAAGGAATTGCAGATATTGGTATCGTTGGTAGCGACATTTTAGATGAGCGTCATTACAATGTTAAT	putative ATP phosphoribosyltransferase	SAR2761	MRSA252	0	0	0	0	0.23	0.2492	0_tan	0.0014	0.91	0.96	0.88	1	1	0.77	1	0.92	0.89	1	1	0	0
GGAAGTTTATAATGAAAATAACTAATTGCAAAATAAAAAAAGAAACTATAGTATATGAAGTTTTAACTAG	hypothetical protein	SA0320	COL	0	0	0	0	0.2	0.3883	0_tan	0.0144	0.96	0.92	0.89	0.98	0.97	0.92	1	0.71	1	0.75	1	0	0
GGAATGTTGTTATATGCTAAAACAGACGAAAATATTGTTTTGAACGATAAATTTCATATGAGTGGTAGTC	putative restriction enzyme modulator protein	SAR0088	MRSA252	0	0	0	0	0.32	0.1194	0_tan	0.8672	0.54	0.41	0.47	0.49	1	0.02	0.43	0.1	0.09	0	0	0	0
GGAATTGAAGACAATTACACCCCATTAATCATTAAACCATCTGTAATTAAAGGTATTAATTACAAGATGG	3-phosphoshikimate 1-carboxyvinyltransferase	SAR1475	MRSA252	0	0	0	0	0.23	0.6919	0_tan	0.0047	0.82	0.85	0.76	0.92	1	0.55	0.92	0.7	0.54	0.83	1	0	0
GGACAAGATGAGATTGATAAAATTGTAAAAAATGAGGTTGAGAAAAAAGATAATAAATATATGACGCAAG	conserved hypothetical protein	SA1577	COL	0	0	0	0	0.26	0.1705	0_tan	0	0.21	0.3	0.1	0.5	0.17	0.13	0.43	0.43	0.36	0.33	0.5	0	0
GGACCTGATGATATTGGTAAAAACGGTAAAGTTACAAAGCGTACTGTATCTGAATACGATAAAGAGACAA	putative leukocidin S subunit	SAR2108	MRSA252	1	1	0	0	0.35	0.4622	0_tan	0.075	0.91	0.86	0.84	0.94	1	0.66	1	0.63	0.63	0.6	1	0	0
GGATATAAAAATAAATAAGCTAACAATATCAAACTTTGCTGGAATCAAAGAAGAAAGCTTTAACTTTGAC	hypothetical protein	MW1924	MW2	1	0	0	0	0.51	0.4622	0_tan	0.0475	0.48	0.56	0.45	0.66	0.47	0.48	0.25	0.91	0.38	0	1	0	0
GGATGCCAAATTTAAAACAATAATCAAGTTATATGAGTATCAAAAGTCGTCAGAAAATAATTCAGAGTGC	hypothetical protein	SAR1303	MRSA252	0	0	0	0	0.31	1	0_tan	0	0.8	0.8	0.65	0.95	0.99	0.38	0.96	0.58	0.64	0.83	0.9	0	0
GGATGGAACAAAATTACAATGTTTGCGTTGATTGAATTAGTTAAAAGTGAACAACTTGATTTAGTGTATA	hypothetical protein	SA1827	N315	1	0	0	0	0.24	0.0508	0_tan	0.0001	0.77	0.89	0.73	0.95	1	0.59	0.94	0.86	0.62	0.57	1	0	0
GGATTAATAGAAAATTTGAAAATTATGCACGTAGACATGGTTTTACTTCAGCTGTACCGCTACATGAAAT	hypothetical phage protein	SAS0896	MSSA476	1	0	0	0	0.36	0.5106	0_tan	0	0.36	0.43	0.25	0.65	0.23	0.31	0.54	0.67	0.75	0.63	0.55	0	0
GGATTATGCCCCATATACAGCTGAAAATGTCGTTCAAAACGCTAATAAATTAATAGATGTTTTTAGAAAA	isochorismatase	SA0172	COL	0	0	0	0	0.15	1	0_tan	0.0148	0.92	0.93	0.88	0.97	0.7	1	1	1	0.95	1	0.86	0	0
GGATTATTGATTGTTGGTGGAATGTCATCTGGCAAAATAGTAACAGCATTACTCATATTAGATGCAACTA	hypothetical protein	SA1474	COL	0	0	0	0	0.1	0.476	0_tan	0.0018	0.95	0.97	0.92	1	0.83	1	1	1	1	1	1	0	0
GGATTCCACTATATATAGGTGTGCTACTACTTTATTATTCTCGTTTTATAATCATGCATAACAATGAGTA	ORFID:SAS070~hypothetical protein, similar to transposase for IS232	SAS070	N315	0	0	0	0	0.31	0.2203	0_tan	0.683	0.99	0.94	0.98	0.95	1	1	0.95	1	0	1	0.63	0	0
GGCACGTATTGACAATAAAGACAATCAGAATCAAGTTAGTCTAAACAAACAGACAGAGGGGTCTGAACAA	putative transport protein	SAR2437	MRSA252	0	0	0	0	0.21	1	0_tan	0.0219	0.78	0.78	0.71	0.86	1	0.47	0.94	0.58	0.54	0.44	1	0	0
GGCATCATATGATATTAAGCCAGGTACATTTAAATATATTGAGTCAGAGATATATAACCTACAAGAGAAC	prophage L54a, transcriptional regulator, RinA family	SA0364	COL	1	0	0	0	0.44	1	0_tan	0	0.54	0.55	0.4	0.8	0.46	0.57	0.79	0.29	0.58	0.6	0.56	0	0
GGCGCAGTGATTAATTTTACAAAATCAATCGCAATTGAGTATGGTCGTGATGGCATTCGATCCAATGCAA	ORFID:SA2260~hypothetical protein, similar to glucose 1-dehydrogenase	SA2260	N315	0	0	0	0	0.61	0.6699	0_tan	0.8296	0.4	0.34	0.39	0.35	0.05	0.95	0.33	0	0	0	1	0	0
GGCGGCTTTGTGAATAGTCTAATAATGAAGGATTTAAGCGATAATGATATGCGTTTTAAATATGAATATT	hypothetical protein	SA2637	COL	0	0	0	0	0.05	1	0_tan	0.2317	0.99	0.99	1	0.98	1	1	1	1	1	0.78	1	0	0
GGCGTTAGTTTACAAAAGAAATTTAATGAAGTACTAGGTAATATAGAATCGTCTAACATGTACAGAGATA	ORFID:SA2010~hypothetical protein, similar to RNA-directed DNA polymerase	SA2010	N315	0	0	0	0	0.44	0.2262	0_tan	0.0651	0.64	0.54	0.65	0.48	0.25	1	0.57	0	0.11	0	0.25	0	0
GGCTAAAACAATTAGTTGATATTGAAAGAGATTGGATTCCTGAAGGGGAAGGTCAATCATTATATATTCG	branched-chain amino acid aminotransferase	SA0600	COL	0	0	0	0	0.06	0.2599	0_tan	0.1191	0.95	0.98	0.95	0.99	0.88	1	1	1	1	1	1	0	0
GGCTATCAACAATATAAAGATGACAGTCAGATAAGAAATTCAACAAGTGCGAGTAAAGTGATGGTAATGA	hypothetical protein, similar to butyryl-CoA dehydrogenase	MW2203	MW2	0	0	0	0	0.03	0.4809	0_tan	0.0033	0.95	0.98	0.93	1	0.88	1	1	1	1	1	1	0	0
GGCTCAAATAAGCCTTAATACAGTTTTAGGTAACAGAGATATAAGTTTAGAATCTATTGAAAAAGAATCG	nicking enzyme	VRA0057	Michigan	0	0	0	0	0.24	0.1651	0_tan	0	0.28	0.19	0.35	0.08	0.5	0.13	0	0.14	0.15	0	0	0	0
GGCTTTGTGTTTGGTTCGGTTTCGACAATGCTTGTAGATTGGGCTTATCAAAATAATAAGGCTGGTATAA	putative membrane protein	SAR0602	MRSA252	0	0	0	0	0.36	0.3417	0_tan	0.0076	0.74	0.81	0.7	0.9	1	0.54	0.8	0.57	0.55	0.75	0.5	0	0
GGGCAAGTACCTAAAAAAAGCATTAGACAAATTGAGTCGATTATAGCGTGCTTATATTACATGGTTCAAT	conserved hypothetical protein	MW0346	MW2	0	0	0	0	0.18	0.3119	0_tan	0.0349	0.96	0.99	0.95	1	0.92	1	1	1	1	1	1	0	0
GGGGATATTGTTCAAGATTGTTATTCGAGAGAAGTAAGTTTTATCGAGTTTAAAGAAGGAGCCTTTTATA	phage uncharacterized protein TIGR01671	SA0354	COL	1	0	0	0	0.46	1	0_tan	0.1208	0.81	0.8	0.76	0.87	0.76	0.8	0.94	0.71	0.91	0.6	0.83	0	0
GGGGTATATAAAAAGAATGGCTTTATACATGAGTGTATTTCTTTTAATCATTTTTATTGTTGGATGTCGA	Staphylococcus tandem lipoprotein	SA0484	COL	1	0	0	0	0.59	0.1775	0_tan	0.5011	0.95	1	0.96	1	0.97	0.93	1	1	1	1	1	0	0
GGTAAAGATTATATAGATGTTATAGTAGACAATCAATATTCTCAAATTTCTTTAGTTGGATCTGATAAAG	exotoxin 6	SA0382	N315	1	1	0	0	0.44	0.4895	0_tan	0.0289	0.56	0.49	0.6	0.39	0.07	0.98	0.5	0.13	0	0	0.11	0	0
GGTAACCTTCCAGATGCTATATTATGTATCAGTGACGAAGAAGCTATTGGTATCATGCATAGTGCAATGG	catabolite control protein A	SAR1814	MRSA252	0	0	0	0	0.25	0.4469	0_tan	1	0.01	0	0.01	0	0.03	0	0	0	0	0	0	0	0
GGTAACTTATGGATTTAATTTAACAGGAGAGATTACAACGTGCGAAAACAAGTTATTATTACAAAAACAG	putative exported protein	SAR0370	MRSA252	1	0	0	0	0.33	0.8545	0_tan	0.0003	0.76	0.77	0.65	0.9	1	0.39	0.93	0.67	0.67	0.43	0.56	0	0
GGTAATAGCTATTATCATTTTTGAATTAATTATATTAATGTGTTTAGCAATAGCACTGGAGGTGTTGTAA	hypothetical phage protein	SAS0923a	MSSA476	1	0	0	0	0.26	0.369	0_tan	0.0047	0.9	0.85	0.81	0.96	0.98	0.71	0.89	0.8	0.86	0.88	1	0	0
GGTACCTGTTGTGAACATTGAAAAATTTCATAGTGAACAAAAAGGATTAAGAAATTATGATGAAATTATA	arginase	MW2091	MW2	0	0	0	0	0.22	1	0_tan	0.0045	0.89	0.88	0.82	0.96	0.4	1	0.97	1	1	1	0.82	0	0
GGTAGACAATATGGTTTTGGTATTAATTTAATATCCTATTATCAAGGTTTAAAAAGCAAAGAACAAAAAT	hypothetical protein	SAV0791	Mu50	1	0	0	0	0.23	0.2099	0_tan	0	0.03	0.08	0	0.14	0.03	0.02	0.21	0.07	0.08	0	0.1	0	0
GGTAGGTATAAGCATGAGAGATACAGAAAGAAATATATTGAATATTTTTAAAACGTTATTCGACGAATAT	hypothetical phage protein	SAS1908	MSSA476	0	0	0	0	0.17	0.7212	0_tan	0.7313	0.95	0.97	0.95	0.97	0.98	0.97	0.95	1	0.93	0.25	1	0	0
GGTATGAAACAAGGCTTTGATATTGAACACCTAGCAAATATTAAGTCTCTTGTAAATATTCCAATCATTG	hisF protein (cyclase)	SA2697	COL	0	0	0	0	0.24	0.0726	0_tan	0	0.72	0.83	0.54	0.99	0.8	0.32	0.97	1	0.95	1	0.93	0	0
GGTCATGCACAACATGCAGACGCTGCTGAAAATTATACAAATTATAACTATAATACGACTCAAACTACAA	putative exported protein	SAR2388	MRSA252	0	0	0	0	0.26	1	0_tan	0.0021	0.91	0.92	0.86	0.99	1	0.74	1	0.89	0.8	0.86	1	0	0
GGTCCAGGAAATCTAAGAAATTTTTATACTAAATATGAATATGTGAATTTAAAGAATGTTAAAGACAAAA	extracellular enterotoxin L	SA1816	N315	1	1	0	0	0.38	0.1347	0_tan	0	0.08	0.16	0.04	0.32	0.04	0	0.27	0.44	0.08	0	0.57	0	0
GGTCGCCTCGTCCACGCTTTCGTAATACAGGTAGATTTGTTCAAACTTACATGCCAACGTCTTACACAAA	hypothetical protein	SA1789	N315	1	0	0	0	0.31	0.8313	0_tan	0.0134	0.86	0.84	0.79	0.94	0.68	0.93	0.95	0.83	0.91	0.75	0.9	0	0
GGTGAAATAGGTTATCCGTCTGTAATTTTAAATGACCCTGAAAATACTGTGTTTAGTGGATTTGTATTAA	putative restriction and modification system specificity protein	SAR0434	MRSA252	1	0	0	0	0.19	0.292	0_tan	0.0313	0.76	0.83	0.74	0.87	1	0.57	0.85	0.58	0.53	0.67	1	0	0
GGTGACTGGCAAAAATGCACTACTATCAGATAGTCTTTTAAGAGATATTAAAGTATTAAGTTCTAATGCT	hypothetical protein	SA2450	N315	0	0	0	0	0	0.477	0_tan	1	0.99	1	0.99	1	0.99	1	1	1	1	1	1	0	0
GGTGATGACTATAATGATCATAAACAATTGATGTTATTTAAAAAGGATATAGATAAAATCACGATAAACT	Ear	MW0758	MW2	1	1	0	0	0.38	0.2322	0_tan	0.0027	0.05	0.11	0.04	0.21	0.04	0	0.13	0.5	0.15	0.17	0.1	0	0
GGTGCTAACCAATCAGAAACATCAAAAAATGAACATGATAATGATTCTGTAAAACAAGATCAAGATGAAC	elastin binding protein, putative	SA1522	COL	0	1	1	0	0.2	0.0374	0_tan	0	0.3	0.46	0.15	0.71	0.18	0.08	0.72	0.4	1	1	0.44	0	0
GGTGCTGCTTTAACAGCAGTTTTCCAAAGTAAAAAAGCAAATCCTGACATTGAAAATGGTTTTATTTATA	probabale ammonium transporter	MW1967	MW2	0	0	0	0	0.38	0.7702	0_tan	0.0012	0.93	0.91	0.86	1	0.56	1	1	1	1	1	1	0	0
GGTGGCTTTGAAGAAGGTATTGATATTGAAAATTTACCAGAAAATTTCTCTCAAGTTTTTAGACCTAAAG	hypothetical protein	MW1384	MW2	1	0	0	0	0.3	0.0357	0_tan	0.0191	0.86	0.73	0.86	0.7	0.97	0.68	0.7	0.75	0.85	0.5	0.54	0	0
GGTGGTATTTATAAAATTAAAAGTATTTCCGATTATCCAGGCAATGAAGATATTTCCGTCATGAATATAG	serine protease	SAR1906	MRSA252	1	1	0	0	0.38	1	0_tan	0.3088	0.79	0.78	0.76	0.83	1	0.54	0.91	0.67	0.55	0.4	0.33	0	0
GGTGGTTAAAGAAATTTTGAGACTATTATTCTTACTAGCAATGTATGAGTTAGGTAAGTATGTAACTGAG	hypothetical protein, similar to int gene activator RinB [Bacteriophage phi	MW1411	MW2	1	0	0	0	0.44	1	0_tan	0.0087	0.92	0.91	0.85	0.98	0.9	0.9	0.93	0.92	0.89	1	1	0	0
GGTGGTTGGATTGGATGGACAGTGTTTATCCTATTATGGGGCACAACGCTTTGGGGAATTTTATATAAAT	putative membrane protein	SAR2261	MRSA252	0	0	0	0	0.36	1	0_tan	0.6487	0.97	0.96	0.96	0.98	1	0.88	1	1	1	1	1	0	0
GGTGTTTATAGAAGAACAGTTGATAAATATTTAAATGGCTTTGAGCCAACCAAAAAGAGAAATCGTCAGT	ORFID:SA1624~transposase homolog for IS232 [Pathogenicity island SaPIn3]	SA1624	N315	1	0	0	0	0.32	0.7084	0_tan	0.7098	0.79	0.76	0.76	0.79	0.58	1	0.96	0.43	0.22	0.57	0.55	0	0
GGTTACAAAATGCGAAATTAATGGATAATAGTAATAAGTCAACGGATTATCTTAAGCAATCAGACGAATT	hypothetical protein	SA1320	N315	0	0	0	0	0.26	0.2893	0_tan	0.0001	0.59	0.5	0.68	0.39	0.27	0.97	0.48	0.25	0.33	0.22	0.1	0	0
GGTTACGGCGAAGACGGGGAAAGAAGCGGACTTTCGCCTAAGAACAGAACAACCAGATATTATCTTATTA	ORFID:SA0066~hypothetical protein, similar to kdp operon transcriptional	SA0066	N315	0	0	0	1	0.4	0.0692	0_tan	0	0.89	0.77	0.97	0.29	0.94	0.93	0.5	0.83	0.6	0.2	0.38	0	0
GGTTAGATAAAGGATTCTTCTTTGAACCAACGTTAATTGCTGTGCCAGATAATCATCATAAATTAGCGCA	putative aldehyde dehydrogenase	SAR0169	MRSA252	0	0	0	0	0.25	0.6822	0_tan	0.2137	0.96	0.98	0.95	0.99	1	0.9	1	1	0.8	1	1	0	0
GGTTATCGTACACTTGTTGCTGGTATTGATGCTTCTAATGAAGCGAGTATTAAATTACATCAAAAATTCA	ORFID:SA2317~hypothetical protein, similar to N-acetyltransferase	SA2317	N315	0	0	0	0	0.24	0.521	0_tan	0.0286	0.84	0.88	0.81	0.93	0.73	1	0.92	0.67	0.56	1	0.75	0	0
GGTTCATATTATTAGATGGTTTCTGGCATATAAAAAAGTTCCTAAAATTTTGGTAGATAAAATTATAGCA	hypothetical protein	SA2011	N315	0	0	0	0	0.46	0.282	0_tan	0.7026	0.67	0.57	0.63	0.6	0.26	1	0.5	0.25	0.13	0	0.22	0	0
GGTTGGAAAACTGTGTTTGGTAGAATTTGATTATGCTACAAGTCAAGATTTTTTATCATTAAGTAGTCTT	putative type I restriction modification DNA specificity protein	SAR1898	MRSA252	1	0	0	0	0.32	0.433	0_tan	0.8725	0.51	0.44	0.49	0.47	1	0.03	0.4	0	0	0	0	0	0
GGTTGTTCTAATTCTAATGATAATCAAGACAACAAAAAAGATGCAGCAGACAATGGAAAAAAACAAGAAA	putative molybdate-binding lipoprotein precursor	SAR2363	MRSA252	0	0	0	0	0.26	0.8593	0_tan	0.0036	0.76	0.78	0.68	0.88	1	0.4	0.88	0.56	0.5	0.38	1	0	0
GTAAAAAAAGCGGTTAATGAAGCGGTTAAGGTTAACGCTAGACAATCGCCATTGACTGGTGGAGATTCAT	hypothetical protein	SAV0890	Mu50	1	0	0	0	0.28	0.6787	0_tan	0.2028	0.83	0.86	0.81	0.89	0.8	0.91	0.8	0.9	0.73	0.71	0.93	0	0
GTAAAAAATTTTATCCGACTAAATATTTACTAATTTATAATGATAATAAAACAGTTGAGAGTAAATCTAT	enterotoxin YENT2	SA1644	N315	1	1	0	0	0.19	0.0812	0_tan	0.8259	0.92	0.83	0.88	0.87	1	1	0.9	0	0	0.2	1	0	0
GTAAACTCTCAAGCCAACCATTATTATTAACACGATCAACACTTGGACTCATAGGTGTATTATTAAATAT	putative membrane protein	SAR0783	MRSA252	0	0	0	0	0.26	1	0_tan	0.3311	0.03	0.02	0.04	0.01	0.29	0	0	0	0	0	0	0	0
GTAAATCATAAAGGGAAATATGTGCGTTCGATAGAATACATTACAAAAGATATTCCTAGCTTTTTAAAAT	hypothetical protein	SAP021	N315	0	0	0	0	0.2	1	0_tan	0	0.83	0.82	0.68	0.96	1	0.34	0.93	0.94	0.64	0.89	0.94	0	0
GTAAATGGATAAATATGATTAACATTGCTGATTATACTGATTCAAAATATAATATTGCACCAGATGAACT	hypothetical protein	MW0298	MW2	0	0	0	0	0.05	1	0_tan	0.4978	0.99	0.99	0.98	1	0.98	1	1	1	0.95	1	1	0	0
GTAACCGATGGGTTTAAAAAAAGATGGCCAATTAATATAGGTTTTATTGGTAATGTTAGATTTAATGAGA	capsular polysaccharide synthesis enzyme Cap8H	MW0131	MW2	0	0	1	0	0.26	0.3493	0_tan	0	0.76	0.83	0.64	0.98	1	0.09	0.94	1	0.38	1	1	0	0
GTAATAACACCAGTGAAATCCATATGCATACCCTCTTTCTATTTAAGATACATTAAGTATAATATCAAAC	hypothetical protein	SAR0042	MRSA252	0	0	0	1	0.26	0.2949	0_tan	0.5775	0.94	0.89	0.93	0.89	0.97	0.96	0.95	0.77	0.73	0.67	0.82	0	0
GTAATGAGTGTAGTATATATTTTAACTTCAGTCATAATGTTCTACATTAATGGATTAAGTAAACAATTTT	hypothetical protein	SAS006	N315	0	0	0	0	0.38	0.57	0_tan	0.0022	0.72	0.77	0.64	0.86	0.33	0.98	0.95	0.92	0.5	0.2	0.7	0	0
GTAATTATTAGTAAAGGTGAACCAAAAGAAGAGATTACAAAAGATCCGATTAATGAATTAACAGAATACG	cell wall surface anchor family protein	SA2505	COL	0	0	1	0	0.34	0.875	0_tan	0.1479	0.53	0.51	0.57	0.45	0.05	0.98	0.21	0.13	1	0	0.1	0	0
GTAATTGGTTCAGCAAAATTTTTGATGAGGTATATTGAAGATGTAGATAAAGCTCATTATGATGCTATGA	hypothetical protein	SAR0080	MRSA252	0	0	0	1	0.24	0.3728	0_tan	0.2931	0.55	0.47	0.54	0.46	1	0.21	0.18	0.15	0.23	0.13	0.25	0	0
GTAATTTCACAATTAAGACAAGGAAAGCGCGAAGTAGATAACTTAACTTTAAATACAACTGAAAAACTAT	hypothetical protein	SA0911	COL	1	0	0	0	0.3	0.7991	0_tan	0.7914	0.89	0.91	0.91	0.89	0.89	0.92	0.88	0.88	0.94	0.75	0.83	0	0
GTACAAGATATCAAGGATCATGTTGAAGCAGTTGATATCATGTTAGACGCATTTAAAAAACATAATATCA	acetate kinase	SAR1789	MRSA252	0	0	0	0	0.44	1	0_tan	0.4258	0.88	0.87	0.86	0.91	1	0.65	0.86	0.71	0.78	1	0.83	0	0
GTACACAAATCAATGTTTTATGCTTTACAAAGTTATATTGGCAGTAGTTAACTGCAGTCCACAAACATAG	putative membrane protein	SAS1774	MSSA476	0	0	0	0	0.18	0.4574	0_tan	0.2578	0.98	0.95	0.95	0.98	0.86	1	1	1	1	1	0.87	0	0
GTACAGCTATTTATAACCATTATAAAGCTGGGCATGGTTATAAAGGTGCACAAGCTGCTTCTAAATTTTT	putative membrane protein	SAR0093	MRSA252	0	0	0	0	0.38	0.8565	0_tan	0.0143	0.7	0.72	0.63	0.84	1	0.3	0.91	0.6	0.45	0.25	0.44	0	0
GTACCAAGGATGAGGATACTATAGAAGGCTATTGGACTTATGATGAAACCTTTACTGGAGGTGTAACACC	exotoxin	SAR1141	MRSA252	1	1	0	0	0.41	0.3877	0_tan	0.1932	0.67	0.6	0.59	0.72	1	0.19	0.67	0.14	0.38	0.17	0.43	0	0
GTACCTAGAGACTCAGATAAATATGTCACACAAATATTCAACTTAAAATTAGAAGCAATAAGACAAAACG	probable ss-1,3-N-acetylglucosaminyltransferase	SA1808	N315	1	0	0	0	0.44	0.8443	0_tan	0.0847	0.28	0.25	0.22	0.37	0.12	0.48	0.25	0	0.09	0	0.44	0	0
GTACTTAAGTGGGTTAGTTCCTATAATAATGAAAGGGATGCTTGGTTTGTACTTTATCCACCAAGCAAAG	hypothetical protein	SAS003	N315	0	0	0	0	0.44	1	0_tan	0.6658	0.95	0.96	0.97	0.94	0.98	0.98	1	0.83	0.6	0.8	1	0	0
GTACTTCAGTAATCACTGCTACGTCTACTGATGGAAGCGATAAGTCAGGACAAATTTCAGTGACAGTAAC	major tail protein	MW1392	MW2	1	0	0	0	0.26	0.2627	0_tan	0.249	0.9	0.85	0.9	0.84	0.97	0.79	0.86	0.91	0.82	0.8	0.75	0	0
GTACTTTCCATATATCAAAATAAAAACAATGACATTTCTGAAGAAAAAGCAGAGGCTTTAATTGATGCGT	hypothetical phage protein	SAR2051	MRSA252	1	0	0	0	0.14	1	0_tan	0.3804	0.94	0.94	0.93	0.96	0.99	0.97	0.92	0.78	0.8	0.71	1	0	0
GTAGATAAACTGACAGGTACGAGTGAAGATAAGGAAGGCAAAGCATTCAGAGAAAATCAGAAATGGATGA	hypothetical protein, similar to glucose 1-dehydrogenase	MW2396	MW2	0	0	0	0	0.3	0.7547	0_tan	0.0068	0.93	0.95	0.89	0.99	1	0.62	1	1	0.8	1	1	0	0
GTAGTATCTTATCAATGATGAAAGACTCAATTAAAACTGATGTTACAACTGCGAAAGTTACAGTTATAGA	hypothetical protein, similar to ABC transporter (permease)	MW2621	MW2	0	0	0	0	0.26	0.7732	0_tan	0.0129	0.94	0.93	0.89	0.99	1	0.7	1	1	0.85	1	1	0	0
GTATAAGTAATAGTGATACAAACTATATTCATACATTGGAGAATAAACTGGATGCGGTTATTAATTGTTT	putative membrane protein	SAS1878	MSSA476	0	0	0	0	0.25	0.0631	0_tan	0.0001	0.2	0.33	0.16	0.43	0.16	0.08	0.58	0.75	0.54	0.14	0.18	0	0
GTATAATTTCAACTATGATTATGCACATAAAATTGTATCAAAAAAATACGATTATTCAATTTTTATAAAA	hypothetical protein	SA1337	COL	0	0	0	0	0.51	0.0543	0_tan	0	0.43	0.63	0.19	0.87	0.11	0.31	0.95	1	0.93	1	0.22	0	0
GTATACATTTAGAAGGAACATACACAGTTGCTGATAGAGTATATACACCTAAGAGAAATATTACTCTTAA	ORFID:SA0357~hypothetical protein, similar to exotoxin 2	SA0357	N315	0	1	0	0	0.14	0.1069	0_tan	0	0.89	0.96	0.84	1	0.63	1	1	1	1	1	1	0	0
GTATATTAATTATGATGTGATTAAGAGGGGGTGCCTCATGGAAAGTACATATAAAAAAAGAGGGAAACTT	sensor kinase protein	SAR0069	MRSA252	0	0	0	1	0.36	0.4408	0_tan	0.2303	1	0.99	1	0.97	1	0.98	1	1	1	1	1	0	0
GTATCTATTATCGGTCCTTTATTAGAAGAATACGTATTCAGAAAAGTAATCTTTGGAGAATTATTTAATG	conserved hypothetical protein	SA1838	N315	0	0	0	0	0.13	0.1885	0_tan	0.0226	0.96	0.99	0.95	1	0.9	1	1	1	1	1	1	0	0
GTATGAAGCTTCGGGTGGAAGTGATGATACTAGAGAAGGCACCGTAATGGGTGGCGAGGTGTTAGTGATT	gamma-glutamyltranspeptidase	SA0188	COL	0	0	0	0	0.36	0.0184	1_yellow	0	0.55	0.73	0.35	0.97	0.37	0.26	0.96	0.88	1	1	1	1	0
GTATGCAACAAGCTAGAAAAGAGTTAGATTATACTGCCAATACTGATGCAGTTTCTACACTTTTTTCAAC	hypothetical protein	MW1444	MW2	0	0	0	0	0.35	0.2604	0_tan	0.0012	0.53	0.62	0.46	0.72	0.15	0.85	0.95	0.93	0.22	1	0.23	0	0
GTATGCCTATTACAGAATTTAGCAATAACGAAAGAAGAAAAGGGGATTACGAGAAAGTAATCACTTTAAT	hypothetical protein	SAV0887	Mu50	1	0	0	0	0.35	0.2581	0_tan	0.6039	0.64	0.55	0.62	0.56	0.54	0.84	0.11	0.25	0.42	0.14	0.77	0	0
GTATGGTGGAAGACCCGAAAAATTAAACAAACAAGATTTAAAATTGCTCAAAACACTTTATGATAATGGT	putative resolvase	SAR0719	MRSA252	0	0	0	0	0.21	0.4464	0_tan	0.0655	0.9	0.93	0.88	0.96	1	0.87	1	0.92	0.69	0.57	0.87	0	0
GTATTACGCAAGATGAAATGGCTCACAAAATGGGGTGGAAAACAAGAACGCCTTATGCAAAGAGAGAAAA	transcriptional regulator, putative	SA0891	COL	1	0	0	0	0.46	0.0554	0_tan	0	0.62	0.78	0.34	0.99	0.64	0.44	1	0.75	0.85	0.83	1	0	0
GTATTGATAATAGCATTGTACAAGTTTTAATAATGCCGTTTTTGTACGCCAATACTTACTATTCTATCGA	hypothetical protein	SAV0876	Mu50	1	0	0	0	0.18	0.356	0_tan	0.0052	0.92	0.87	0.95	0.82	0.97	0.93	0.85	0.75	0.5	0.7	0.94	0	0
GTATTTGAGAAGTTCTGTTTAACACCTTTATTAAAAAAGATTCAGAACGAATTAAACGCGAAACTCATAA	hypothetical protein	SA1776	N315	1	0	0	0	0.11	0.5717	0_tan	1	0.95	0.93	0.94	0.94	0.99	1	0.85	0.75	0.82	0.67	1	0	0
GTATTTTAGCTACAGGTGTAAATACTGTAACGGAACAACCGGTGCATGCCGAAAATAAACATGTTCAAGT	exotoxin	SAR0423	MRSA252	1	1	0	0	0.29	1	0_tan	0.0476	0.81	0.81	0.75	0.88	1	0.46	0.88	0.75	0.5	0.57	1	0	0
GTCAAAGGCCGACTATATTTAAAGTTGAATATGAAATTAATGGTAAAAGAAATATTAGAAGAATATTAAA	conserved hypothetical protein	SA0281	N315	0	0	0	0	0.32	0.4779	0_tan	0.0124	0.77	0.71	0.81	0.63	0.53	1	0.61	0.2	0.94	0.25	0.45	0	0
GTCAAGAACAAGGCGAACAAATCACTGTTAAAACGCCTAATAAAGTGGAATTAGACTATTTACAAGAATG	conserved hypothetical protein	SA1585	COL	0	0	0	0	0.26	0.4868	0_tan	0.0003	0.86	0.9	0.79	0.97	1	0.56	0.92	0.83	1	0.83	0.86	0	0
GTCAAGAATTGATACTTATACGCGCTAGATATGCTTATCAAGATTTATTAGAACACTTCAACGATAATTA	hypothetical protein	SA1772	N315	1	0	0	0	0.14	1	0_tan	0.7233	0.96	0.96	0.95	0.97	0.99	1	0.96	0.75	0.88	0.71	1	0	0
GTCATATTTCTCAAGAAGAAGCTGAGACGATATTGCGTCAAATGAAACAGCGACAACGTTATCAACGCGA	putative sulfite reductase [NADPH] flavoprotein alpha-component	SAR2698	MRSA252	0	0	0	0	0.19	1	0_tan	0.0132	0.9	0.9	0.85	0.97	1	0.72	0.94	1	0.73	1	0.92	0	0
GTCCAATAAGTATATTACTAAAACTAAAATCTTAAATCAATTGGGATATGAATATAATTCAAGCAATGAA	hypothetical protein	SA1825	N315	1	0	0	0	0.29	0.8648	0_tan	0.0017	0.71	0.73	0.62	0.85	1	0.25	0.88	0.43	0.88	0.29	0.64	0	0
GTCCGTACTCTACAAAGATTATTTAGAATGTGTAAAGTTAGGTTCGGTTAAATTAACCTGCAATAATTTT	hypothetical protein	SA0328	COL	1	0	0	0	0.33	0.1983	0_tan	1	0.88	0.79	0.84	0.84	0.99	0.72	0.79	0.63	0.75	0.57	0.83	0	0
GTCCTTATTGTGATTCAACACTAACTAATATGACCATTAGAAAAAAGCACCATACATTACGTTATTATGT	cassette chromosome recombinase A1	SA0042	COL	0	0	0	1	0.49	1	0_tan	0.4049	0.02	0.02	0.01	0.04	0	0.02	0	0	0	0	0.13	0	0
GTGAAAAGGAAATCGAATGTATTAACAATCATAAAAATTGTAACGGATATAGTGGCAACCGTGTTAATCA	hypothetical protein	SA1165	COL	1	0	0	0	0.13	0.1512	0_tan	0	0.83	0.9	0.77	0.96	0.49	1	0.97	1	1	1	0.86	0	0
GTGAAAGAAAGCAAATTAAAAAAATATAAAGTGGTCTCGGATAGAGAAGGTAAGAAATATCTAATTAAAT	hypothetical phage protein	SAR1553	MRSA252	1	0	0	0	0.31	0.8581	0_tan	0	0.75	0.76	0.63	0.97	1	0.49	0.94	0.5	0.42	0.5	0.92	0	0
GTGAAGGCGACACTTTAGTTATTTACAAGCTAGATAGATTAGGCAGGACTACTAAGCAACTGATAGATTT	putative resolvase	SAVP017	Mu50	0	0	0	0	0.47	1	0_tan	0.0283	0.6	0.59	0.53	0.75	0.83	0.4	0.67	0.5	0.27	0	0.83	0	0
GTGAATATTATAAAGGGAGAGGATTTGAATTAACAAATGTAACAGGATATAAATACGGAAATAAAGTTAC	exotoxin 15	SA0393	N315	1	1	0	0	0.42	0.106	0_tan	0.3577	0.73	0.6	0.64	0.72	0.33	1	0.73	0.14	0.11	0.33	0.56	0	0
GTGACAAAATATTATCATCAGTAGGACAACCTGAACAAGCTAAAGGGGGAAATTTAGTAGACATTGCTAA	hyaluronate lyase precursor	MW2129	MW2	0	1	0	0	0.28	1	0_tan	0.24	0.99	0.99	0.98	1	0.98	1	1	1	0.83	1	1	0	0
GTGACAACTAAATTAATTTCACCATTTGGAAAGTTAAGAGCAGGGTTTGATTTATTTAAAAAACCTACTC	putative protoporphyrinogen oxidase	SAR1923	MRSA252	0	0	0	0	0.19	0.2282	0_tan	0.0002	0.82	0.88	0.76	0.96	1	0.5	1	0.92	0.67	1	1	0	0
GTGACAGGTATCATCCCGTTAGTGCCAGGTGGATTAGCTTACGATGCAACGAAAAATTTAGTATTATTAA	putative membrane protein	SAR0590	MRSA252	0	0	0	0	0.17	0.3255	0_tan	0.0063	0.89	0.93	0.86	0.97	1	0.77	1	0.88	0.73	0.75	1	0	0
GTGAGTCTTACTCTAAGGTTGAACATGAACTAAATAGCAAAAAAATGAATGTTAAGGAAAAGTTGAATCA	hypothetical protein	SAR0103	MRSA252	0	0	0	0	0.27	0.7523	0_tan	0.7482	0.64	0.66	0.64	0.67	1	0.36	0.56	0.22	0.27	1	0	0	0
GTGATGATGAACAGCAAGCTATTCGGTCATGTATATATTAAAGATTGTAAAGTAAGGCAATCATTTGAAT	hypothetical protein	SA1826	N315	1	0	0	0	0.33	0.8632	0_tan	0.0078	0.72	0.71	0.64	0.83	1	0.26	0.8	0.2	0.93	0	0.71	0	0
GTGATGCCAGAAACAGCACCAATTGCTAAACAGAATGCTACCAAAGGATATGGTGCAAAAGTCATTTTAA	ORFID:SA1271~threonine deaminase IlvA homolog	SA1271	N315	0	0	0	0	0.29	1	0_tan	0.0155	0.87	0.88	0.82	0.96	0.7	1	0.83	0.67	0.75	1	1	0	0
GTGATTATAAATTAAAGAAACATTATTTCGTGAAAAGTACGAATGAGGAAAAAGCCACGAACATGGTATT	hypothetical phage protein	SAR1534	MRSA252	1	0	0	0	0.36	1	0_tan	0.0401	0.76	0.75	0.69	0.84	0.98	0.35	0.86	0.56	0.5	0.71	0.75	0	0
GTGCAAAATACAATGTGTCTATCAGTTCACAATCTAATGATTCGGTTAATGTAGTAGACTATGCACCTAA	gamma-hemolysin component C precursor	SAR2511	MRSA252	0	1	0	0	0.25	0.8477	0_tan	0.0323	0.81	0.83	0.76	0.89	1	0.57	0.94	0.56	0.53	0.57	1	0	0
GTGCAGAAGAACAAGCATTATTCGACAAATCAGTTAAAACATTAGAAGATACTTTCGATTCAATTAAATA	L-lactate dehydrogenase 2	SAR2680	MRSA252	0	0	0	0	0.2	1	0_tan	0.0164	0.91	0.92	0.87	0.97	1	0.68	1	0.89	1	0.89	1	0	0
GTGCCGTATCAGACCGTACAAGATTTGAGGAATGGTAAAACGAAAATAGAAGATGCTAGATTTAGAACAA	hypothetical protein	SAR1137	MRSA252	1	0	0	0	0.3	0.6854	0_tan	0.002	0.81	0.84	0.74	0.92	1	0.41	0.9	0.67	0.58	0.67	1	0	0
GTGCGAAAACAAGTTATTATTACAAAAACAGTAGTTGGCTGGTACAACATTAAAGATACTCAACATAATT	hypothetical protein	SAR0371	MRSA252	0	0	0	0	0.28	0.688	0_tan	0.0001	0.81	0.84	0.71	0.94	1	0.57	0.87	0.8	0.71	0.71	0.7	0	0
GTGCTTGGAGCAGGGGAAGATAACGGACGCTAAGATTGTGCACCATATAGTTTATCTAGACAATGACTTT	hypothetical phage protein	SAR1521	MRSA252	1	0	0	0	0.41	0.5322	0_tan	0.3681	0.77	0.82	0.77	0.85	1	0.66	0.9	0.5	0.5	0.6	0.38	0	0
GTGGAATCACAGCTACTAACGAATATCTAGATAAACCTAGAAATATACCTATAAATATATGGATCAATGG	staphylococcal enterotoxin Sek	MW1938	MW2	1	1	0	0	0.39	0.0326	0_tan	0.1351	0.05	0.17	0.08	0.18	0.02	0.04	0.1	0.78	0.63	0	0	0	0
GTGGTATTTATATTTTTAAAGAAGAATCTTTTAGAATTACACATATATTACACTAGGTTTATTGAAAAAA	hypothetical protein	SA2677	COL	0	0	0	0	0.47	0.0805	0_tan	0	0.69	0.84	0.61	0.93	0.19	1	0.95	1	0.93	1	0.56	0	0
GTGTATTCTTACAAAAAGAACCGGATAATCCTTATGATGAAAACGCGATAAAAGTTATGATTTCAAATGA	hypothetical protein	SAV1999	Mu50	1	0	0	0	0.36	0.4628	0_tan	0.5497	0.23	0.28	0.24	0.29	0.14	0.51	0.2	0.11	0	0	0.11	0	0
GTGTTGATGATGTTGAAATACTAGCAAACGAAACAGCTGATCATGTGCTTGAACTTAGAGAGGAACATAA	hypothetical protein	SA1762	N315	1	0	0	0	0.15	1	0_tan	0.3336	0.95	0.95	0.93	0.97	0.99	0.88	1	1	1	0.71	0.94	0	0
GTGTTTAGTAGTGGCAAACTGAAACCTACTAAAACAATTGATAATTACAGTCAAAAAAAGGACGTTTTTA	alkaline phosphatase synthesis sensor protein	SAR1771	MRSA252	0	0	0	0	0.36	0.1814	0_tan	0.0363	0.8	0.89	0.79	0.93	1	0.55	1	0.86	0.78	0.8	1	0	0
GTTAAACATATTGTACCCCTATATTGAAACCATTCACATTACGAAAGATAAAAATCTTATAGGAATCTAT	cassette chromosome recombinase A	SA0058	N315	0	0	0	1	0.43	0.0124	1_yellow	0	0.8	0.6	0.87	0.22	0.69	0.94	0.38	0.5	0.69	0.17	0.33	1	0
GTTAAAGTTAAAAAAGGTGATTTTGTAATTGTTTATAAATTAGCAGATTCAGATAAAATTGTTAAAGTTA	conserved hypothetical protein	SA2381	COL	0	0	0	0	0.11	0.7584	0_tan	0.0002	0.94	0.96	0.89	1	0.74	1	1	1	1	1	1	0	0
GTTAACGAAAAACGATTTAAGCAGGCAGATGTATTTGAAGATTTATATAGAGAGAAACTAAAAGACACAA	hypothetical protein	SA1529	COL	0	0	0	0	0.26	0.0016	3_red	0	0.41	0.65	0.16	0.98	0.35	0.23	0.95	0.64	1	0.71	0.85	1	0
GTTAATAAAACGGCAGTCAAGACTAGTGAACCAATAGCTTTTGTGATTTTCATTATACATTTATCTCCTT	hypothetical protein	MW0371	MW2	1	0	0	0	0.33	0.0014	3_red	0	0.29	0.55	0.1	0.92	0.27	0.13	0.88	1	0.45	0.5	0.77	1	0
GTTAATGATATTCATGTTTATTTTGATACTTATGACCCTAAAAAAGATAGTTATAAAGTTTTTGTTCAGT	hypothetical protein	SA1575	COL	0	0	0	0	0.19	0.7395	0_tan	0	0.74	0.77	0.6	0.92	1	0.23	0.92	0.64	0.94	0.63	0.75	0	0
GTTACAAGATTTTCCATCAAAAGAAAATACAGTTACAGAACCGGAACAAGTTGTAGTAAATCCGTTGTTT	conserved hypothetical protein	SAR0369	MRSA252	1	0	0	0	0.41	1	0_tan	0.0873	0.81	0.8	0.75	0.88	1	0.42	0.89	0.8	0.9	0.25	0.67	0	0
GTTACGAAACATCGGCTATTTTCATGGATTCAAAGGGTATAATTTCTTTTTAAACAAAGAAGAAGAACTT	hypothetical protein	SAR0386	MRSA252	0	0	0	0	0.24	0.8647	0_tan	0.016	0.74	0.76	0.68	0.84	1	0.39	0.83	0.4	0.4	0.57	1	0	0
GTTAGAATGGCTAGCCCTATTATTGTTAATGCAAGATTTTCTGATCCAATTACTGGTGTTGAAAAGTTGA	hypothetical protein	MW0040	MW2	0	0	0	1	0.3	0.5774	0_tan	0.5597	0.07	0.09	0.09	0.06	0.04	0.02	0.07	0.36	0.23	0	0.18	0	0
GTTAGAGGTATATGAGATTCAAGAAGGAGTCTATAAATCCGCATTACACAAAGGTATCAGTTTGAACGAA	hypothetical phage protein	SAS0915	MSSA476	1	0	0	0	0.3	0.0579	0_tan	0	0.52	0.67	0.34	0.92	0.36	0.6	0.85	0.7	0.81	0.75	0.71	0	0
GTTAGCATATTTTAAAATGTTCCCTAATTTAACAGAAACGTATATAGCACCTCAAAACGAATACAAACGT	traK protein	VRA0018	Michigan	0	0	0	0	0.43	0.1657	0_tan	0.017	0.49	0.37	0.51	0.28	0.68	0.31	0.22	0.3	0.25	0	0.4	0	0
GTTAGGGGCAATTTTAGCTAGTTTGTTTAATGCTACTTTTGTAAATACGGTATATGTAATAATCGCCATA	conserved hypothetical protein	SA0046	N315	0	0	0	1	0.51	0.0183	1_yellow	0	0.94	0.78	0.99	0.19	0.98	0.98	0.2	0.33	0.75	0	0.33	1	0
GTTATAATTGATGATCTTAGTCTACCAATACGTGCAGGTTATTCGTTGGAAATTAAAGTCCCATTAAATG	hypothetical protein	MW0171	MW2	0	0	0	0	0.31	0.1496	0_tan	0.0162	0.68	0.56	0.7	0.51	0.26	0.98	0.6	0.86	0	0	0.18	0	0
GTTATTATCCAGAATATAATATCGCAGTAAGTTGGCAACGTTTAAGAGAAGGAAAAACAATAAAAAGCAA	hypothetical protein	MW1195	MW2	0	0	0	0	0.18	0.0924	0_tan	0.0005	0.86	0.94	0.82	0.97	0.67	1	0.94	1	0.94	1	0.86	0	0
GTTATTTATAGTAATGATAATAAAACAGCTACAGTCGATTTAATGAAAGGCCAAACAAGCAGCAATAAAC	sdrC protein	SA0608	COL	0	0	1	0	0.26	0.0016	3_red	0	0.38	0.63	0.25	0.83	0.25	0.15	0.74	0.6	1	1	0.94	1	0
GTTCAACAAACTGCCAAAGCAGAAAATAATGTCACAAAAATTCAAGATACTAATATTTTTCCATATACTG	serine protease SplB	SA1630	N315	1	1	0	0	0.3	0.8331	0_tan	0.0105	0.83	0.85	0.77	0.92	0.15	0.98	1	1	0.94	1	0.5	0	0
GTTCGCAACGCATAACAATGTCGTTGTAATATCAATTATTGCGACTATAATCATCATATTAATAGAAATC	putative membrane protein	SAR0347	MRSA252	0	0	0	0	0.3	0.71	0_tan	0.2549	0.8	0.77	0.75	0.83	0.99	0.49	0.9	0.63	0.55	0.33	1	0	0
GTTCTATATTGTGTTAGACAACAAGCAAGTCATCGAAAACTCTGACTTACTATTCAAAAAGAAATTTGAT	hypothetical protein	SAV0881	Mu50	1	0	0	0	0.42	0.3739	0_tan	1	0.68	0.6	0.65	0.64	0.84	0.55	0.4	0.33	0.44	0.5	0.67	0	0
GTTCTTAATGAATACAGATTTAATTAGAAATAAAATAAAAGGTATGATGCAAGGAGCAACCCAAGTTTAT	probable specificity determinant HsdS	MW0393	MW2	1	0	0	0	0.41	0.1368	0_tan	0	0.23	0.36	0.12	0.59	0.16	0.1	0.6	1	0	0	0.33	0	0
GTTGAAAATGCGAATTTATATGGAGCTGATAGTGAAGATATAACAAGACAAATAGAATATTTGAAAGCCA	hypothetical protein	SA0406	N315	0	0	0	0	0.26	0.3392	0_tan	0.1441	0.7	0.63	0.71	0.6	0.46	0.98	0.81	0.29	0.42	0.17	0.33	0	0
GTTGAACGCAACTGTTGTGTGACTTTTGATGTTGATAGCATCTTATGTAATGTGACTGGATACGTATCAA	hypothetical protein	SA0352	COL	1	0	0	0	0.41	0.131	0_tan	0	0.39	0.52	0.31	0.76	0.14	0.51	0.71	0.5	0.69	0.57	0.63	0	0
GTTGACTAAACCTGTGCTAGGAGAGATTTTTAAGGATGTCGTAAATATTTCAAGAAGTGCAAGGGCATAT	inositol monophosphatase family protein	SAR1081	MRSA252	0	0	0	0	0.28	1	0_tan	0.0189	0.85	0.85	0.79	0.92	1	0.59	1	0.75	0.6	0.67	1	0	0
GTTGATAGCTTTACACCTGATACTTCAAAACTTATAGATGTTACTGATAAATTCAAAATCACATACAGCA	putative surface anchored protein	SAR0566	MRSA252	0	0	1	0	0.35	0.4047	0_tan	1	0.68	0.6	0.64	0.64	1	0.28	0.5	0.1	0.5	0	0.86	0	0
GTTGGAATGCCTTTACCTAAAAATGACCGCTCACAGCGACCAGCAAGAGGTAAAACGATTCAAGCTAAAA	Arabidopsis thaliana genomic DNA	SAV0781	Mu50	0	0	0	0	0.11	0.2689	0_tan	0.0001	0.91	0.96	0.87	1	0.82	1	1	0.93	0.8	1	1	0	0
GTTGGTGAAAACTATAATGGCAACAAGGGGTTAATGCTAAATCAGAGAGATATAACAAAAATAACTATAA	hypothetical protein	SA0908	COL	1	0	0	0	0.44	0.0794	0_tan	0	0.19	0.34	0.11	0.69	0.09	0.14	0.71	0.5	0.78	0.25	0.38	0	0
GTTGGTTAGGTGGCGCAATTTATGGTTTGCTATATGCACCGCTTGTAATTACTGGCTTGCATCATATGTT	sugar-specific PTS transport system, IIBC component	SAR0473	MRSA252	0	0	0	0	0.32	0.2168	0_tan	0.0187	0.86	0.92	0.84	0.97	0.99	0.67	1	0.86	0.78	1	1	0	0
GTTGTAACTGACTATGAAAATGAATTTGAGAGTGAAACAGGAAATCTTGTTGTAGATATACAGACTGATT	hypothetical protein	MW1202	MW2	0	0	0	0	0.18	0.581	0_tan	0	0.79	0.83	0.65	0.97	1	0.22	0.89	1	1	1	0.86	0	0
GTTGTAGGGACTGCATCACCAATACATCAAGAAGCACAGGCGGCAACAACACCTTACTATACTTATCATG	immunodominant antigen B	SAR2717	MRSA252	0	0	0	0	0.26	0.7628	0_tan	0.0663	0.93	0.94	0.91	0.98	1	0.8	1	1	0.8	0.88	1	0	0
GTTGTCGAAAAAATCACTTATGATAGGGCGAATGCTTTTAAATTAAATCAAGAGTTAAAGAATTATGGCT	terminase large subunit	MW1401	MW2	1	0	0	0	0.46	0.475	0_tan	0.0753	0.04	0.08	0.04	0.14	0.07	0	0.11	0.25	0	0.14	0.17	0	0
GTTTCAAATATTCAAAATACAAATAATATAGCAAATCCTAATTTAATATTTATTGGTCAAAAATTAAAAG	cell wall hydrolase	SA1264	COL	0	1	0	0	0.1	1	0_tan	0.1739	0.98	0.97	0.99	0.96	1	1	0.74	1	1	1	1	0	0
GTTTCAACGCGGTTGATAAAAACGTAAGCAATAGTAACCACGGACAAAATGTCTCTAACGAATACATTAA	lipoprotein	SAR0790	MRSA252	0	0	0	0	0.29	0.8664	0_tan	0.0885	0.72	0.7	0.66	0.78	1	0.32	0.67	0.29	0.3	0.38	1	0	0
GTTTCTGAAAAACATCTAAACGAAAATATTAATAATCTAAGAGGCACGGTTAATCTAGACGAAAAATGTA	hypothetical protein	SA1809	N315	1	0	0	0	0.4	0.5481	0_tan	0.0672	0.24	0.2	0.18	0.34	0.09	0.38	0.29	0	0.11	0	0.4	0	0
GTTTGGACAGCCAGAAGTGTATTTAACTATAAAAGATATTATACCAAAGTTGTCTAGAGCAAAATTATAT	putative nucleoside permease	SAR0310	MRSA252	0	0	0	0	0.19	0.2243	0_tan	0	0.82	0.88	0.75	0.97	1	0.57	1	0.88	0.46	0.86	1	0	0
GTTTTAAACGTGACTTCAAGCTATATGAATGCAACGAGCTGTACATTATAAAATACATATCAAAAAAGCT	IS1272-related, transposase, degenerate	SA2355	COL	0	0	0	0	0.38	0.3169	0_tan	0.0438	0.97	0.91	0.88	0.98	0.9	0.92	0.95	1	1	1	0.8	0	0
GTTTTAAAGCAAATATTGCTAATCACGAGACGAAATAGAAATCATTTAACAGAATGCGTATCAATATTCA	putative transposase	SAR0416	MRSA252	1	0	0	0	0.36	1	0_tan	0.3821	0.65	0.66	0.63	0.7	1	0.31	0.63	0.38	0.38	0.38	0.3	0	0
GTTTTCAAAAGTAAACAATCAAAAGATGTTAGAAGATTGCTTCTATATAAGAAAGAAAGTGTTTGTAGAA	acetyltransferase, GNAT family	SA1063	COL	0	0	0	0	0.1	0.338	0_tan	0.0541	0.97	0.99	0.96	1	0.91	1	1	1	1	1	1	0	0
GTTTTGGATTTTACGGATTTACGTTTTATAGGAAAATATGAAAACATAGTCTTTTTAGACTCAAATGTCG	ORFID:SA2013~truncated IS232 IstB protein homolog	SA2013	N315	0	0	0	0	0.49	0.4586	0_tan	1	0.62	0.55	0.6	0.58	0.16	0.98	0.5	0	0.25	0	0.3	0	0
GTTTTTATAACGGACCTTCTAACAGCTATTTGTTTAATGGGATTCAATTTATATATTCCAGTCTACCTTC	ORFID:SA1972~hypothetical protein, similar to multidrug transporter	SA1972	N315	0	0	0	0	0.13	0.5343	0_tan	0.0035	0.85	0.89	0.8	0.94	0.56	0.98	0.97	1	1	1	0.69	0	0
TAAAAAACTTGACTGTAACTTGGTATAACGTTATTGCTTTAGCAATTATTGTTATTGTCTTAAGCACCGT	putative membrane protein	SAR2783	MRSA252	0	0	0	0	0.38	0.6814	0_tan	0.0065	0.97	0.95	0.91	1	1	0.78	1	1	0.78	1	1	0	0
TAAAAAGCATGCTCGCGATCACATAGCTGTTTCTAATGTGAAAACAGACAGACACACAAGTGAGAAAATC	hypothetical protein	MW1900	MW2	1	0	0	0	0.26	0.0056	2_orange	0	0.48	0.69	0.22	0.97	0.42	0.28	0.96	0.94	0.87	0.71	0.86	1	0
TAAAAAGCTTATGAGATTGTTCTACATAGCTGCAATTATAATAACTTTATTATGTCTTATTAATAATAAT	enterotoxin SeN	SA1643	N315	1	1	0	0	0.44	0.855	0_tan	0.3555	0.68	0.65	0.63	0.72	0.14	1	0.82	0	0	0	1	0	0
TAAAAAGGGCGACAAAGGAATGTGGACTATATATACAGATTTTGCTAAAGGCAATAAATCAGACGAATTG	Staphylococcus tandem lipoprotein	SA0481	COL	1	0	0	0	0.29	0.4934	0_tan	1	0.97	0.94	0.96	0.95	0.96	0.98	0.89	0.71	1	1	0.86	0	0
TAAAAAGTTACCGTTTGCCACAAACAAATATCGTCACATCATCTATTCATAGTTCTGAAATGACTGGTGA	conserved hypothetical protein	SA0042	N315	0	0	0	1	0.35	0.0062	2_orange	0	0.86	0.68	0.95	0.42	0.98	0.89	0.6	0.29	0.4	0.29	0.36	1	0
TAAAAATAAATTAGATAAATTAAAAATAGGCGAAGCAGGAATTATTCAAAATAGCATTGTACAGAAATCC	hypothetical protein	SA0382	COL	1	0	0	0	0.21	0.1646	0_tan	0.0404	0.89	0.81	0.8	0.91	1	0.67	0.89	0.75	0.86	0.7	0.92	0	0
TAAAAATGCTGTTTTATGGCGGTTTCAAAATGGTGTTTCGATTAATAAGCCACAGCAAGACTTAGATCTA	hypothetical protein	SA2009	N315	0	0	0	0	0.14	1	0_tan	0.4878	1	0.99	0.99	1	1	1	1	0.89	1	1	1	0	0
TAAAAATGTAATGGTTAAAGGTTTAACTGCTTTAACTATTTTAACATCTCTTGGTTTCGCTGAAAATATT	serine protease SplA	SA1631	N315	1	1	0	0	0.37	0.6766	0_tan	0.0185	0.81	0.83	0.75	0.9	0.13	0.98	1	1	1	1	0	0	0
TAAAACAAACAATTTATGAATGGATTGAATTCAACACAGATGAACAGGACAAATTAATCAATTTAATCAT	hypothetical phage protein	SAS0905	MSSA476	1	0	0	0	0.36	0.6262	0_tan	0.0008	0.86	0.89	0.77	0.96	0.95	0.76	0.92	0.71	0.75	0.83	0.95	0	0
TAAAACACTAGAAACTTTAAAAGGTAAATGTAATTTAGTAACAAATTCTGAATCTCTTTCAGACTTAAAA	hypothetical protein	VRA0025	Michigan	0	0	0	0	0.35	0.7346	0_tan	0.1115	0.35	0.32	0.29	0.42	0.58	0.17	0.43	0	0.14	0.14	0.33	0	0
TAAAACGTCCAATTCGAATGAGAAATCTAGTCGCAATGCTTTTGTTCAGCATATTTATACTCTACATCAA	putative membrane protein	SAR1372	MRSA252	0	0	0	0	0.23	0.7174	0_tan	0.3531	0.79	0.81	0.77	0.84	1	0.58	0.76	0.55	0.5	0.5	1	0	0
TAAAATTAAGTAAAAAAGTCCCTAACATAATACAAAAATGGATTATCAGTATTTTAATCGTTTTTGCTAT	conserved domain protein	SA0061	COL	0	0	0	0	0.28	1	0_tan	0.2913	0.84	0.84	0.81	0.88	0.52	1	0.86	1	0.95	0	0.67	0	0
TAAACAACGAAAGATTGAATATATTGCAGACTTCGCGTTATATCTCGATGACAAACTGATTGAAGTTATC	hypothetical protein	SAV0872	Mu50	1	0	0	0	0.36	0.0301	0_tan	0	0.1	0.23	0.01	0.53	0.12	0.04	0.5	0.45	0.08	0.17	0.42	0	0
TAAACAACTATCTCTAGACCTTCAAATCCTACTTTGGAATATGGTAAAAGATCGAGACAATCAACTTAAT	hypothetical protein	SAS0030	MSSA476	0	0	0	0	0.52	0.0392	0_tan	0.0584	0.67	0.48	0.64	0.46	0.82	0.61	0.4	0.29	0.2	0.17	0.47	0	0
TAAACATTTTATACTTTATCAGAACAAAAAAGACATGCATCAACATGTCAGTGAAACTAATCCATATTAT	hypothetical protein	SA1632	N315	1	0	0	0	0.26	0.5731	0_tan	0.0396	0.91	0.94	0.88	0.97	0.66	1	1	1	1	1	0.73	0	0
TAAACCAGGAAGTGAAGATTTGAATTATTATACCGATATACCTAAGGAGTATAATGTTTCTGTGCAAGTA	conserved hypothetical protein	SA0295	COL	0	0	0	0	0.53	0.0566	0_tan	0	0.5	0.68	0.24	0.93	0.36	0.3	0.84	0.75	0.58	1	0.95	0	0
TAAACGGATTGTTGATAAAGAATTACAACGTAAAAAAATCCGCAATACAAATAAAGGTAAAGAGCTTCAG	conserved hypothetical protein	SAR2596	MRSA252	0	0	0	0	0.23	0.8743	0_tan	0.5234	0.7	0.69	0.68	0.72	1	0.45	0.85	0.42	0.43	0.33	0.46	0	0
TAAACTAATAGATACTGATGTAGAAAAAGTAAAAGCTGAATTATTAGCAATTAATAAATTATCTCGTGAA	ORFID:SA1158~hypothetical protein, similar to two-component sensor histidin	SA1158	N315	0	0	0	0	0.25	0.4194	0_tan	0.0259	0.81	0.86	0.78	0.9	0.28	0.98	0.92	1	1	1	0.44	0	0
TAAACTCACCCGGACAAAAATATGAGGAATTGAGAAATGTTATAAAAAAGGAAATTTCTAATGGTCATTG	hypothetical protein	SAV0867	Mu50	1	0	0	0	0.26	0.1255	0_tan	0	0.68	0.79	0.53	0.98	0.5	0.77	1	0.64	0.87	0.75	1	0	0
TAAACTTTATGGTGCTTTTAAAGAAAAATACGAAAAAGAATTGCGTGACAATGAGACGCAAAAAGAAGCT	conserved hypothetical protein	SAR0231	MRSA252	0	0	0	0	0.22	0.2064	0_tan	0.0001	0.88	0.94	0.83	0.99	1	0.7	1	0.92	0.89	0.86	1	0	0
TAAAGAACCTAAACAAGATTTAGAAGCTGCAACTGCTCAAATGGAAACTACTAAAGGTAAAAAATCTAGT	PTS system, mannitol-specific IIBC component	SAR2244	MRSA252	0	0	0	0	0.23	0.78	0_tan	0.0192	0.92	0.94	0.89	0.98	1	0.78	1	0.88	0.8	0.88	1	0	0
TAAAGAATGGTCATGAGGATTTAGCAAAGGCGAAGTTTTACGTCCAAAGAGCATTTGATTTGTGGGAGTG	hypothetical phage protein	SAS0912	MSSA476	1	0	0	0	0.08	0.4977	0_tan	0.4612	1	0.99	1	0.99	1	1	0.97	1	1	1	1	0	0
TAAAGAATTAGTTGAAGAATTTGAAAGTATAGAAAAAGCGAAAAAGAATTCAAATTCAAAAGATAAATAG	hypothetical protein	SA1343	COL	0	0	0	0	0.36	0.0918	0_tan	0	0.68	0.8	0.42	1	0.95	0.22	0.95	0.75	0.94	0.83	0.94	0	0
TAAAGACAGTAGAGGCACATAAAACGCATATTATGACAAAGCTTGGCTTGAAAAGTAAACCAGAGCTCGT	putative response regulator	SAR2480	MRSA252	0	0	0	0	0.28	1	0_tan	1	1	0.99	0.99	1	1	0.97	1	1	1	1	1	0	0
TAAAGACGAACGTATACGATTCTATAAGTCTAAAGAATGGCAAACAACAAGAAAAAGAGTACTAGAAAGA	hypothetical protein	SA1779	N315	1	0	0	0	0.13	0.7186	0_tan	0.0143	0.96	0.97	0.93	1	0.99	0.98	1	0.85	0.8	1	1	0	0
TAAAGATTCATTACATGATTCTGATATTATTTTAAGTAACGAGTACGAAACAATCAACGTTACTTATTTA	beta-lactamase, putative	SA1870	COL	1	0	0	0	0.29	0.0065	1_yellow	0	0.26	0.47	0.17	0.71	0.16	0.12	0.77	0.93	1	0.2	0.36	1	0
TAAAGATTTAGAATCTATTATTGATGATTTCTTCATTGAAACCAAGTTGAATAGACCTAAACACATTACT	staphylocoagulase precursor	MW0206	MW2	0	1	0	0	0.21	0.0137	1_yellow	0	0.18	0.34	0.14	0.44	0.08	0.05	0.55	0.86	0.09	0	1	1	0
TAAAGCTTAAACATCGCGAAAGTGATTTTGAATTTACTAAAAACCATAAGAGATTATTGTTAGGTTCTGT	putative membrane protein	SAR1683	MRSA252	0	0	0	0	0.23	0.7383	0_tan	0.2395	0.73	0.75	0.7	0.78	1	0.47	0.69	0.38	0.38	0.43	1	0	0
TAAAGGATGACCAAGGATTAGATATACCTAATTTACAAAAGAAAACGGTTCAGGAGTACTTAAAAGAAGC	DNA polymerase	MW1425	MW2	1	0	0	0	0.27	0.0385	0_tan	0	0.8	0.66	0.87	0.54	0.97	0.67	0.31	0.5	0.79	0.6	0.36	0	0
TAAAGTAATTAAAGCTTTTAAACTTAAACCTGACTGTCATTGTACATCGAAATATCTGAATAACCTCATT	IS431mec, transposase	SA0028	COL	0	0	0	1	0.31	0.004	2_orange	0	0.93	0.76	1	0.47	0.95	0.97	0.5	0.8	0.81	0.33	0.44	1	0
TAAAGTCTACGATAACGAAAGTACATCAATTGCACAATACGGTTATCAATCTGCGATGCCAAAAGCTAAA	hypothetical protein	MW1912	MW2	1	0	0	0	0.31	0.0414	0_tan	0	0.45	0.62	0.23	0.94	0.33	0.24	0.96	0.93	0.69	0.67	0.9	0	0
TAAAGTTGAATTCCAGAATGACGACGTAGAAGGCAATTTTATTGATCGTTTGTTTGATGAGAGCTCGCAT	hypothetical protein	MW1898	MW2	1	0	0	0	0.39	0.0882	0_tan	0	0.3	0.45	0.2	0.74	0.27	0.19	0.87	0.92	0.4	0.4	0.25	0	0
TAAATACTTTAAAAAATGTGAAGAAGTTGTTAAACGTTGTTATGTACTTAGTTTTAAAAAATCGGTTTAG	hypothetical protein	SA0817	COL	0	0	0	0	0.28	1	0_tan	1	1	0.99	1	0.99	1	1	1	1	1	1	0.92	0	0
TAAATATAGAGGGATGAAGACTCAAGTATTATTGCCTGGAGATGAGTACCGTAAATATCAACAGCGAAGA	exotoxin 4	SAR0431	MRSA252	1	1	0	0	0.26	0.8224	0_tan	0.0052	0.87	0.88	0.81	0.95	1	0.67	0.95	0.78	0.64	0.78	1	0	0
TAAATCAAAATTTGATACTAAAGGGCTCACGCTATTTTATATATTCCAGTCTACCTTCAAGAACAACTAG	hypothetical protein	SAV2169	Mu50	0	0	0	0	0.16	1	0_tan	0.0918	0.96	0.95	0.93	0.98	0.81	1	1	1	1	1	0.88	0	0
TAAATCAATATGATACAACGCTATTTAATAAAGACAGCAAAGCGGTTAATGATGCGATTGTTAAGCAGAA	putative membrane protein	SAR0281	MRSA252	0	0	0	0	0.06	0.4768	0_tan	0.0027	0.95	0.98	0.93	1	1	0.85	1	1	1	1	1	0	0
TAAATGAAATTATACACAAAATCAATGAACGTTTTCCAAATGATTTTACTCAAGGCGATAGAGTACTCGT	putative type I restriction enzyme protein	SAS0025	MSSA476	0	0	0	0	0.18	0.4975	0_tan	0.4112	0	0.01	0	0.01	0.02	0	0	0	0	0	0	0	0
TAAATGAGATGTCAGAGTCACTCTTATTATACGTATACTCAGTCTTAATCAATGTTACCTCTATTAATAA	hypothetical protein	SA0074	N315	0	0	0	1	0.39	0.0011	3_red	0	0.84	0.59	0.91	0.29	0.94	0.89	0.58	0.2	0.13	0	0.18	1	0
TAAATGGCAATCCAATTAAATCATTCCCGTTTGAAATAACAGAACTTCCAAAAGATACTAAATATCTTGC	conserved hypothetical protein	SA0840	N315	0	0	0	0	0.38	0.3003	0_tan	0.1535	0.71	0.62	0.71	0.59	0.38	0.98	0.64	0.43	0.33	0.25	0.46	0	0
TAAATTAATTCCAATTATTGTTATCGTTATCTTTGGTATTTTCCAATCAGGAGACATCACTTTTTCATTA	amino acid permease	SAR1449	MRSA252	0	0	0	0	0.25	0.6038	0_tan	0.1662	0.74	0.78	0.72	0.81	1	0.45	0.73	0.5	0.5	0.5	1	0	0
TAAATTATATACAAAATTTGGATTTATACCTACGGAACCAGATTCAGGTGGAATGTATATTAAGTTTTAA	hypothetical protein	MW2293	MW2	0	0	0	0	0.39	0.0579	0_tan	0	0.67	0.81	0.43	0.99	0.41	0.32	1	1	1	1	0.93	0	0
TAAATTATTACCTTATCGATTTATTCAGACAACAAAATCAATTAAAAGATGTCATTTTATGTGAGAATAA	hypothetical protein	SA1595	N315	0	0	0	0	0.2	0.6453	0_tan	0.0056	0.88	0.9	0.82	0.95	0.55	0.98	0.97	1	1	1	0.71	0	0
TAAATTCTACGATTACCCAAATGAACATCTACTAACCGGTGTCAAACTTCCAAAGAAAAGAAAAACGATT	phage integrase	SAS0891	MSSA476	1	0	0	0	0.46	1	0_tan	0.6887	0.06	0.05	0.06	0.03	0.1	0.07	0	0	0	0	0	0	0
TAAATTTGGCGACCAAGTGACTGGGAATGAAAGTTTGAACCAAAGAGGCGTTGGTTATTTCCTGTATACT	peptide chain release factor 3	SAV1020	Mu50	0	0	0	0	0.33	0.0013	3_red	0	0.33	0.6	0	1	0.3	0.19	0.96	0.69	0.5	0.83	0.92	1	0
TAACAAGAATTTTAAAATGTTTATTGTGATTAAAAATACAAAAGTCATTATTTTAAAGAATAAAATATTT	hypothetical protein	SA0258	COL	0	0	0	0	0.59	0.8318	0_tan	0	0.33	0.35	0	0.72	0.28	0.11	0.67	0.5	0.5	1	0.18	0	0
TAACAATTTTATTACTAGCAATATCTAACATGTATGTCGCTTTTAGCGTTTATGCTTGGCTAATAACTTT	pathogenicity island protein	SA0893	COL	1	0	0	0	0.26	0.0721	0_tan	0.0013	0.82	0.92	0.79	0.95	1	0.5	0.92	0.91	1	0.8	0.92	0	0
TAACATCATTTAATGATGCTTTTGTAGCAACTGCTTTAGTAGGTGGGATTATCATGATTATCATTTCAAT	QacA protein	SAVP032	Mu50	0	0	0	0	0.44	1	0_tan	0.6745	0.05	0.05	0.06	0.03	0.05	0.08	0	0	0.09	0	0	0	0
TAACATCGACGAAATAGATTTTTGGTTGAGGTTTGGTTTCAAGCTAAAAAGATATACAGGTTTAAGTAAA	hypothetical phage protein	SAS0922	MSSA476	1	0	0	0	0.3	0.0116	1_yellow	0	0.07	0.2	0	0.46	0.06	0.02	0.47	0.13	0.2	0.29	0.38	1	0
TAACATGTTACAATACATTTAACACATCATTTGCAATCATTGAATTTAAATCAAAGATTAGTGGAATAGA	hypothetical protein	SA2244	COL	0	0	0	0	0.15	0.7032	0_tan	0.0036	0.96	0.97	0.92	1	1	0.78	1	1	1	1	1	0	0
TAACGCTCAAGGCGACGGCAAAGATAAACTAAAGGAACCTATTATAGAACATAGTACTCCTATCGAACTT	fibronectin binding protein B	SA2509	COL	0	1	1	0	0.26	0.0442	0_tan	0	0.29	0.44	0.21	0.59	0.1	0.12	0.72	0.5	1	1	0.36	0	0
TAACGGATTTGATGTGGAAGTCGATGTAAGCGTCATAGATCCATTTCAAATTACCGGCAAGCAACGACGA	hypothetical protein	SAV0866	Mu50	1	0	0	0	0.36	0.8081	0_tan	1	0.87	0.89	0.87	0.88	0.88	0.89	0.9	0.86	0.88	0.71	0.83	0	0
TAACTTAAAATACGCAAGTAGCAAAGATGTGCAAATATTGAAGTCGTGGTATTTGAGAGGTGAAAATGAT	putative membrane protein	SAR2161	MRSA252	0	0	0	0	0.23	0.1633	0_tan	0	0.85	0.92	0.8	0.99	1	0.67	1	0.91	0.7	0.86	0.94	0	0
TAAGAATAGTAATTTGAATGGTGCTGCTGATATTAAAATATATGAGTTATTAGATGATAAAAGTAAACCA	hypothetical protein	SA1532	COL	0	0	0	0	0.29	0.0063	2_orange	0	0.24	0.45	0.17	0.63	0.04	0.04	0.69	0.38	1	0	1	1	0
TAAGAATGATTGATACCATAAAACAATCACAACGATTTAGCAGAAGGCAGAAAGTTTACTTCTATAAAAG	traC protein	VRA0010	Michigan	0	0	0	0	0.45	0.601	0_tan	0.8548	0.5	0.45	0.47	0.49	0.72	0.26	0.58	0.5	0.18	0.17	0.3	0	0
TAAGCTTCTACAAGGTTTAGCAATAGCAAATGATATTAACTATGATTTGAATTATATTAAAGGGTATTTG	peptidase, M20/M25/M40 family	SA0595	COL	0	0	0	0	0.07	0.1801	0_tan	0.0003	0.91	0.96	0.87	0.99	0.75	0.98	0.97	1	1	1	1	0	0
TAAGGAGAAAGGTCATTGGTATAATCTTGAGAAAGAGTGGCAAGAGTTCTTAAACTCTGGGAAAGAGGTG	conserved hypothetical protein	SA0281	COL	0	0	0	0	0.27	0.0199	1_yellow	0	0.21	0.38	0.16	0.49	0.14	0.09	0.61	0.33	0.95	0.17	0.31	1	0
TAAGTAGAACAGATAATATAAGTGAAATTGTAAAGTCTATATTGCATAATAATTTGCGTTTTATCTCTCC	replication initiation factor family protein	SA1583	COL	0	0	0	0	0.23	0.7092	0_tan	0.0001	0.8	0.82	0.7	0.93	1	0.41	0.91	0.8	0.94	0.57	0.79	0	0
TAAGTCAATTAGAAAAACAAATTGCACAACTGAAAGAGCAAAAGAAAAAACAAGAAGAACAACTATCTAA	hypothetical protein	SAVP002	Mu50	0	0	0	0	0.34	0.0059	2_orange	0	0.4	0.63	0.01	1	0.33	0.24	1	0.85	0.5	1	0.92	1	0
TAATAAAAAGTCTGTACGTAAATATATCTTTGACTCAGCTAACATGACAAATCATGGTGGCGACGGTGAA	hypothetical protein	SAV1957	Mu50	1	0	0	0	0.33	0.7146	0_tan	0.0137	0.95	0.96	0.91	1	0.98	0.93	1	0.88	0.8	1	1	0	0
TAATAAAATAGACGAAGATAAGAAAGAACAGTTTAGGAATATTTTAAATGATAATCCAGGGTCTCAACAC	hypothetical protein	SAV0025	Mu50	0	0	0	1	0.37	0.1544	0_tan	0	0.94	0.86	0.99	0.59	0.94	0.98	0.4	1	0.83	0	0.67	0	0
TAATAAAGTTATAAGGTTTATTTTACGTACTGCAATTGGTTACAGTATATTTGCATATGGTTTACATTAC	hypothetical protein	SA2192	N315	0	0	0	0	0.39	0.354	0_tan	0.0001	0.83	0.88	0.73	0.95	0.46	0.98	1	0.93	1	0.67	0.9	0	0
TAATAACCAAGAACAAGAAAATAAATCTACGCATAAAAAAACAGAAACCGAAGAAAATGATCAACAAGAT	conserved hypothetical protein	SA2432	N315	0	0	0	0	0.1	0.5197	0_tan	0.0006	0.94	0.97	0.9	1	0.82	1	1	1	0.95	1	1	0	0
TAATAGAAACTTTGACAAACTAAATGATAATGATTTACATATCGCCCACTTCATCAACACACACGTTGAT	putative transcription regulator	SAR2409	MRSA252	0	0	0	0	0.3	0.0916	0_tan	0.0012	0.12	0.04	0.14	0.01	0.81	0	0	0	0	0	0	0	0
TAATATTCCAGGTGTAGGCTTAGAAGGCACAGTTGATAATAAAAAACTCAAAATAGTGAATGTTTCTTAT	putative cation exporting ATPase protein	SAR0720	MRSA252	0	0	0	0	0.32	0.2753	0_tan	0.8714	0.52	0.44	0.48	0.49	1	0.02	0.38	0	0	0	0	0	0
TAATCAAACCACGTTAGAAACATGGTTGTTAGAAAGTCAAAAAGAGGTGATACCTTATGAAGAAAAATGA	ORFID:SA0197~hypothetical protein, similar to ABC transporter ATP-binding	SA0197	N315	0	0	0	0	0.31	0.84	0_tan	0.0131	0.82	0.83	0.74	0.9	0.48	1	0.95	1	0.56	0.71	0.64	0	0
TAATCACATTAGTCAATGAACTTAATGAGAGAGGCGTGAGTTTCCATAGCTTAGAAGAAAATATAACCAT	DNA invertase	VRA0050	Michigan	0	0	0	0	0.35	0.0013	3_red	0	0.34	0.6	0	0.97	0.25	0.25	0.96	0.69	0.55	0.71	0.92	1	0
TAATCATCACGGATACTTATCGATTAATTTCTTGCACTATCACGACAGTTACAAAACAAACAATAAGCTT	hypothetical protein	SA1796	N315	1	0	0	0	0.06	0.6167	0_tan	0.6071	0.98	0.99	0.99	0.98	0.99	1	0.97	1	1	0.89	1	0	0
TAATGAAATCTCTTAAATCTGAATTTGCAGAAGTACATACGCTTAATAAACGACGTGATCATTTACCAAT	replication initiator protein A	SAVP001	Mu50	0	0	0	0	0.48	1	0_tan	0.3741	0.01	0.02	0.01	0.04	0	0.02	0.14	0	0	0	0	0	0
TAATGGTGTGTCTCAAGAAGTATTAGCAGCATGCTATATTACGCAAGTTGATCAAGTATTTCAAGTTGGT	histidinol dehydrogenase	SA2702	COL	0	0	0	0	0.43	0.2722	0_tan	0	0.85	0.92	0.77	1	0.83	0.73	1	0.89	1	1	1	0	0
TAATGTCATAAAGCAACTTGGTTATGCTAAAGAAGAAATTACAGCAGATAGTGCAGAACAAAAAAGTATA	hypothetical protein	SAV0886	Mu50	1	0	0	0	0.38	0.5149	0_tan	0.0153	0.49	0.44	0.39	0.61	0.53	0.44	0.29	0.3	0.38	0.17	0.82	0	0
TAATGTTATTTTTTCAGATGACTTTAGAGGCAATATTGAAGAAATATTTGAGGGACGTTTATCATATGAT	dehydrosqualene desaturase	SA2576	COL	0	0	0	0	0.02	0.1986	0_tan	0.0016	0.94	0.98	0.91	1	0.85	1	1	1	1	1	1	0	0
TAATTATAATCGGCCATACAAAATTGAAGAGTTTGCTGATTACCTGATTGTTGCTGTTATCGATGATGAA	hypothetical protein	SA0406	COL	0	0	0	0	0.34	0.2358	0_tan	0	0.28	0.38	0.17	0.67	0.17	0.11	0.69	0.38	1	0.17	0.43	0	0
TAATTCTATTAAGACTATGACAATTGTAACTAATAAAGGACGTATTAAATTTATAAGTAAGACAGAACAT	hypothetical protein	SAR1314	MRSA252	0	0	0	0	0.29	0.7177	0_tan	0	0.75	0.78	0.63	0.91	1	0.25	0.88	0.64	0.5	0.8	0.94	0	0
TAATTTAAATGAGAACAAGAAAGAGATAAATAGATTGAGAATGGAGATACTTAACCCAACGAAAGAACTA	phage regulatory protein	SAR1522	MRSA252	1	0	0	0	0.29	0.002	2_orange	0.1017	0.92	0.74	0.87	0.77	0.97	0.77	0.67	0.57	0.73	0.75	0.73	1	1
TAATTTAGATTATCTAGGATTATCTCATGAAAGATATGAAAGTGTATTTAATACTTTGAAAAAACAAAGT	staphylocoagulase precursor, putative	SA0857	COL	0	1	0	0	0.34	0.0018	2_orange	0	0.25	0.49	0.17	0.74	0.21	0.07	0.53	1	1	0	0.58	1	0
TAATTTTGAAAATACGAAAATATTTTTACAACTAGCAAAATCTACTATTAGTACTAATCGAGTTAATTAC	hypothetical protein	MW1376	MW2	0	0	0	0	0.16	0.1412	0_tan	0.008	0.97	0.92	0.98	0.89	0.99	1	0.91	1	0.43	1	0.55	0	0
TACAAAATATGTCATTAAAGAAGGTTATCAAGATATTTATTTCCTCAACAAAAACGGGGAATGGTATTAT	hypotehtical protein	SAP029	N315	0	0	0	0	0.23	0.7893	0_tan	0.0002	0.93	0.91	0.84	0.99	1	0.65	0.96	1	0.67	1	1	0	0
TACAAAGAAGTATAAAAATGTTGAGCGGTCAAAAAGTTATTATAAGATTTATAATGATGGTGAGGTTATT	putative lipoprotein	SAR1288	MRSA252	0	0	0	0	0.29	0.7077	0_tan	0	0.77	0.8	0.65	0.97	1	0.25	0.96	0.7	0.93	0.71	0.78	0	0
TACAACAAAAGTATAGATAAAAACACTGATTTTGTTTTAGATGGTGTGTATGCATATCGAGATATAAATA	conserved hypothetical protein, authentic frameshift	SA0380	COL	1	0	0	0	0.32	0.0281	0_tan	0.0019	0.88	0.74	0.88	0.68	0.98	0.72	0.6	0.56	0.83	0.67	0.6	0	0
TACAACATCACTAAAAAATAATGGTAATTCTGGTGCTTCTTTAGACACAGATGAATTTGTTTATAAAATT	hypothetical protein, similar to FmtB protein	MW1699	MW2	0	0	0	0	0.27	0.0243	0_tan	0	0.18	0.34	0.11	0.52	0.1	0.05	0.72	0.93	0.44	0.67	0.25	0	0
TACAAGAGATGGCAAATTGAATGTATCTTTTGATTATATAGATTGGATAAATACAGAGTTTGATCAATTG	conserved hypothetical protein	SA0293	COL	0	0	0	0	0.23	0.5167	0_tan	0	0.85	0.88	0.72	1	0.49	0.94	1	1	0.94	1	1	0	0
TACAAGGTGCGATTATCATTCCTGTATTATTTATTATGAATGCTTTGTTCGGCCTCACAGGTGTCATATG	conserved hypothetical protein	MW0311	MW2	0	0	0	0	0.19	0.4675	0_tan	0	0.89	0.92	0.82	0.99	0.49	1	1	1	1	1	1	0	0
TACAATGATCAACTAGAAGAAGTGTATGATGGCGTATTAGTAACGACACCACATCAAGTGTTTTTAAATT	protoporphyrinogen oxidase	SA1887	COL	0	0	0	0	0.18	0.0076	1_yellow	0	0.28	0.46	0.15	0.67	0.17	0.11	0.81	0.53	1	0.17	0.42	1	0
TACAATTACAAGTTACTTCGACTATTGGAAAAGGAACAACGGTTAAATTGATCTTCCCATTACAAAATGA	putative sensor histidine kinase protein	SAR0670	MRSA252	0	0	0	0	0.3	0.8652	0_tan	0.2977	0.72	0.7	0.67	0.76	1	0.34	0.75	0.14	0.2	0.17	1	0	0
TACAATTCAATCGTTGATAGGTGAATACGCCATATCAAAAAATCACAAACCAATCATATTAGTTACAGAT	hypothetical protein	SA2076	N315	0	0	0	0	0.04	0.33	0_tan	0.0251	0.9	0.94	0.88	0.96	0.8	0.98	0.97	1	1	1	0.79	0	0
TACACTTTATCTCAAGCATAATACCAAGGAGCCAAACACAATCAAAACTGTACATTTCACTAACTTTGAA	hypothetical protein	MW2400	MW2	0	0	0	0	0.41	0.0607	0_tan	0	0.47	0.63	0.2	0.97	0.37	0.15	1	0.94	0.4	0.67	0.89	0	0
TACAGAATTTGCTGCTTATAACTTCCTTTATACATTCTCATTCTCTATGATTCTTGGTGAATTAATTAGA	abortive infection protein family	SA2328	COL	0	0	0	0	0.02	0.222	0_tan	1	0.98	1	0.99	0.99	0.97	1	1	1	1	1	1	0	0
TACAGATGATGACGAAAAAGCCGATGAAGATGGATTTTCTATTATTGCAATGTGGAATTGGGAACGGAAA	truncated replication protein for plasmid	SA0027	N315	0	0	0	1	0.23	1	0_tan	0.3327	0.94	0.94	0.96	0.91	0.98	0.98	0.95	0.9	0.76	0.83	0.82	0	0
TACAGCTAAAACACTGGATAAGTAACAAAGAAGAAGTTAATTTACATAAACCTTTCTTCTATATTAGTTA	hypothetical protein	SA0195	N315	0	0	0	0	0.26	0.5488	0_tan	0.0499	0.53	0.48	0.58	0.42	0.06	0.98	0.52	0.8	0	0	0	0	0
TACATGACAGTTTAGAATCCATCACAAAAAACTTATATGCGACACCTACTTCGGAACTGCCTTTTGATAA	conserved hypothetical protein	SA2631	COL	0	0	0	0	0.2	0.0252	0_tan	0	0.3	0.46	0.2	0.62	0.16	0.02	0.5	0.93	0.95	1	0.44	0	0
TACATTGAACGAAGTTGTAGCTGTATTGCCGCTTGTATCAGTTGCTAATAAATTGATTGTCTTATTAGTT	hypothetical protein	SA1473	COL	0	0	0	0	0.28	0.7622	0_tan	0.0006	0.94	0.93	0.86	0.99	0.69	0.98	1	1	1	1	0.93	0	0
TACATTGTCTTTAGGACTTATAAGTTTAATTATACCTTTACTAAGCTTAAGTAATATATTTATATCAGGA	conserved hypothetical protein	MW2415	MW2	0	0	0	0	0.24	0.5952	0_tan	0.0208	0.75	0.79	0.7	0.85	0.18	1	0.87	1	1	1	0.5	0	0
TACATTTTTTAAACCAGAATATAATAAACAACATGTGAATGAGGAGTTTAATTCTTTATCTTCTTCGAAA	conserved domain protein, putative	SA2201	COL	0	0	0	0	0.29	0.1352	0_tan	0	0.26	0.37	0.1	0.66	0.18	0.06	0.65	0.25	1	0.38	0.4	0	0
TACCAATATAAGATTGTAGAGCCTACGATTTGGATTTTATGTCCTGGGATCGGTTTCCTATTCTTATTAA	hypothetical protein	MW0369	MW2	1	0	0	0	0.34	0.0007	3_red	0	0.28	0.55	0.12	0.93	0.17	0.11	0.96	1	0.14	0.25	0.75	1	0
TACCAATGAAGTTTCAAAAGAACAATTCCAAGAAATTGAGAATGTAAATAATAAGGTCAAAGAATTTTAT	hypothetical protein	SA0057	COL	0	0	0	0	0.3	0.7505	0_tan	0.0002	0.6	0.63	0.49	0.79	0.22	1	0.74	0.27	0.94	0.2	0.62	0	0
TACCAGGTATTGTTGAAAGTTACGAAGGCTACTTATCAGTATTTGTTAAAGATGATGCAAATAAGTTATT	hypothetical protein	SAV0905	Mu50	1	0	0	0	0.3	0.6246	0_tan	0	0.32	0.36	0.19	0.58	0.28	0.23	0.71	0.15	0.33	0.6	0.62	0	0
TACCGCAAATATTGTTGTCAAAAATAACAATTTAATCAAAACATTGATTCAAACACTTGCCGGTTACACC	putative membrane protein	SAR0232	MRSA252	0	0	0	0	0.21	0.4341	0_tan	0.0014	0.81	0.86	0.75	0.92	1	0.59	0.88	0.92	0.73	0.83	0.77	0	0
TACCTACATCTAAATTGATACAACCAATTATGCAGTTATTTATAGATAATGCTATCCTTAACATTGTTCA	hypothetical protein	SA0364	N315	0	0	0	0	0.41	1	0_tan	0.0586	0.97	0.96	0.93	1	1	1	1	1	0.33	1	1	0	0
TACGAATTATAGCGAAAAAGGCATGCGAGAAATTAAGAAAGATATCGGTATGATATTTCAGCATTTCAAT	ORFID:SA0420~hypothetical protein, similar to ABC transporter ATP-binding	SA0420	N315	1	0	0	0	0.17	0.2462	0_tan	0.2592	0.97	1	0.97	1	0.95	1	1	1	1	1	1	0	0
TACGATTGCATTAATCGAAGATGGCACACCAGTTGTTGCTTTAGCAACTCAAGAAAACGTTAATTTATCA	glucosamine-fructose-6-phosphate aminotransferase	SA1959	N315	0	0	0	0	0.2	0.1363	0_tan	0.0001	0.68	0.58	0.75	0.47	0.5	0.98	0.6	0.29	0.33	0.14	0.42	0	0
TACGTAGCCTTACTTAAAGGTACTTTTAGTTTAGATTCAATTGAATTTAAAACACGAGGTGAAAAAGCAG	major tail protein	MW1393	MW2	1	0	0	0	0.38	0.1064	0_tan	0.1996	0.84	0.73	0.82	0.72	1	0.61	0.57	0.71	0.6	0.63	0.67	0	0
TACTACGTATAAAGACAATCCAACATCTCAAGAAGGTAAATGGGCAAATCAAAAGCTAAAGAAATATAAA	holin	MW1381	MW2	1	0	0	0	0.22	0.4599	0_tan	0.0008	0.92	0.88	0.83	0.98	1	0.74	0.96	0.9	0.77	1	0.89	0	0
TACTAGTTTTAAAAAGACGCCTATGGGTGGCTATATTGTGGATGGATATGTTAATCACAACAAAAATTAT	putative exported protein	SAR1890	MRSA252	0	0	0	0	0.24	0.7095	0_tan	0	0.79	0.82	0.63	0.97	1	0.34	0.96	0.67	0.54	1	0.85	0	0
TACTCAACATTAACAAGCTGGTGCCTATTTACCTTAATCCGAAAACGATTCTTTTCCCAATAAAACAAAA	hypothetical protein	SAR1860	MRSA252	0	0	0	0	0.23	0.32	0_tan	0	0.8	0.86	0.71	0.97	1	0.48	0.95	0.9	0.64	0.78	1	0	0
TACTTAGTAGGTATGAATGATGGAACGATGCCACAACCAGTAACTGCGTCAAGCTTGATTACAGATGAAG	exonuclease RexB	SA0970	COL	0	0	0	0	0.07	0.598	0_tan	0.1135	0.98	0.99	0.97	1	1	0.94	1	1	1	1	1	0	0
TACTTGATATATGAATATCATCAAGATTTTAAAAGTATCGCTAATTTTAAAGTCTTAAAACGCATGATTA	hypothetical protein	SA2247	COL	0	0	0	0	0.14	0.2205	0_tan	0.2251	0.98	1	0.98	1	0.97	1	1	1	1	1	1	0	0
TACTTGCGCCAACAAGTAACAGTGACAAACGATTAACAAAATTAATTCATTTTCAATATAAAACGAAAAA	hypothetical phage protein	SAR2090	MRSA252	1	0	0	0	0.34	1	0_tan	0.2467	0.98	0.99	0.96	1	0.98	0.94	1	1	1	1	1	0	0
TACTTTAAGTAAACAAAATACACATTCCGAAAAATTAAATTTCAGTTTAATTGCAAATATCAATAAAATT	hypothetical protein	SA0795	COL	0	0	0	0	0.31	0.8142	0_tan	0.0002	0.86	0.88	0.76	0.96	0.37	1	0.97	1	1	1	0.73	0	0
TACTTTTACAGGGATTAGACCTGGTGAAAAAATGTATGAAGAATTGATGAATAAGGATGAAATTCACCCT	capsular polysaccharide synthesis enzyme	SAR0154	MRSA252	0	0	0	0	0.24	0.8605	0_tan	0.2894	0.76	0.78	0.74	0.81	1	0.51	0.69	0.63	0.5	0.43	1	0	0
TAGAAAAAAGTGCTCGTGAACATCTTGCACAATATGAGGAAATTGAAATAGATTTACCAAATCAAACTGT	3-isopropylmalate dehydratase small subunit	SA1865	N315	0	0	0	0	0.26	0.3634	0_tan	0.0027	0.92	0.96	0.89	1	0.76	1	1	0.8	1	1	1	0	0
TAGAAATTAAATTAGCACTAATCACAACATTAATTGCATTATTCAGTACATTAATTGTAATTCTGTTATT	fmtA-like protein	SA2445	COL	0	0	0	0	0.09	1	0_tan	0.8309	0.89	0.89	0.88	0.9	0.72	0.98	0.89	1	1	1	0.77	0	0
TAGAAGATAGATTTATCGACGGTATAAATATAACAGATGAGAATGATCTATACACAGCATTAGACATATT	hypothetical protein	MW1926	MW2	1	0	0	0	0.29	0.0122	1_yellow	0	0.49	0.69	0.35	0.92	0.38	0.46	0.89	1	0.79	0.25	0.93	1	0
TAGAATTAACCAATCTAAATTATCTGATTGGGCTTCCTATATGCATCGAGTAACTAAGAATCATCCAATG	hypothetical protein	SAV0858	Mu50	1	0	0	0	0.33	0.0309	0_tan	0	0.14	0.28	0.04	0.59	0.12	0.04	0.54	0.4	0.23	0.29	0.73	0	0
TAGAATTGTTAAATTCGCATTCGGATCATACACCTCTCAATATCTATCGGAATTAACACATGAACAAACT	hypothetical protein	SAV0916	Mu50	1	0	0	0	0.41	0.1259	0_tan	0	0.08	0.17	0.01	0.42	0.06	0	0.55	0	0.1	0.14	0.55	0	0
TAGACAATAACGGTGCGATTGCATTAGCAACTGATTATAACCCTGGTAGTAGTGTCACAAACAACTTACA	imidazolonepropionase	MW2251	MW2	0	0	0	0	0.05	0.1832	0_tan	0.0007	0.91	0.96	0.88	0.99	1	0.74	1	1	1	1	1	0	0
TAGAGAAAGGCACAAAAAATACTGCTCAATTTGAAAAAATGGTTATTTTAACTGAAAATAAAGGTTACTA	hypothetical protein	SA1755	N315	1	0	0	0	0.15	0.6216	0_tan	0.1214	0.97	0.99	0.96	1	0.98	0.98	1	0.9	0.91	1	1	0	0
TAGAGAAGGTATTGAACTTGATGAAGCAATAGGGATTATGACGGGGCAAGTGGTCTATAAATATGAGGAG	hypothetical protein	MW1419	MW2	1	0	0	0	0.02	1	0_tan	0.2468	0.99	0.99	0.98	1	0.99	0.98	1	1	1	1	1	0	0
TAGAGGCGCCGAGTGACTTCGCAAAGTTGAGCGATCAGTCTGATTTGATGAGGGCGGAGGTGACAGAGTA	int gene activator RinB	SAV0882	Mu50	1	0	0	0	0.08	0.4986	0_tan	0.2466	1	0.98	0.98	1	1	0.98	1	0.94	1	1	1	0	0
TAGATATAATAATGAATATTTCATGGTCGATTTAGTAAGTACTTGGATTACTTATTTTTTCGCTATGATT	putative membrane protein	SAS0563	MSSA476	0	0	0	0	0.31	0.0032	2_orange	0	0.36	0.59	0.22	0.86	0.07	0.05	1	1	1	1	0.6	1	0
TAGATCAAAACTGGTATACAAATAACGCAACAGGAAGTCCACCTTATAAAATTAAACACTCTTATCATGA	hypothetical protein	SAV0909	Mu50	1	0	0	0	0.34	0.7412	0_tan	0.6162	0.64	0.66	0.67	0.63	0.7	0.74	0.36	0.4	0.5	0.5	0.77	0	0
TAGATGGCGTGGCGTCAGTTGATGAAAATGAAACACAGTTAGTTATCGTATTTAATGAAGAAGTAAAATA	putative PTS transport system protein	SAR0263	MRSA252	0	0	0	0	0.28	0.2294	0_tan	0.0001	0.86	0.92	0.81	0.99	1	0.59	1	0.86	0.89	1	1	0	0
TAGATGTAATAGACTTCCATAATTTTGCTAAACAATCCTATTTTATTTTGACGGATTCGGGAGGCATACA	UDP-GlcNAc 2-epimerase	SAR2199	MRSA252	0	0	0	0	0.24	0.7192	0_tan	0.1429	0.77	0.8	0.74	0.84	1	0.54	0.85	0.5	0.5	0.5	1	0	0
TAGCAACATTAAGATTGTTAGAAATCATTAAAAAATATAATAGTCATATAAAACGTTTTATCTTTGCTTC	ORFID:SA0123~hypothetical protein, similar to UDP-glucose 4-epimerase (gale	SA0123	N315	0	0	0	0	0.07	0.7093	0_tan	0.0069	0.96	0.97	0.94	1	0.89	1	1	1	0.95	1	1	0	0
TAGCGATGGGACAAACCTTATCAGATATTGGCAACCTTCAGCCGATGACCTCATGGCAAATGATTGGGAA	hypothetical protein	SA0327	COL	0	0	0	0	0.23	0.4103	0_tan	0.0041	0.91	0.94	0.88	0.99	1	0.84	1	0.79	0.78	0.83	1	0	0
TAGCGTTATCTGCTTCTATTGCTAGAGGAGAACCTCAAGAGGCTTACAGTAAGAAATATGACCATTTAAA	hypothetical protein	SAV0885	Mu50	1	0	0	0	0.28	0.1945	0_tan	0	0.61	0.72	0.52	0.88	0.66	0.62	0.78	0.7	0.62	0.57	0.81	0	0
TAGCTAACGGAGAGAAAGTAAAAGCGGTAGATGTGACATCTGAAACAAACTGGAAGTACGAATTTAAAGA	collagen adhesin precursor	MW2612	MW2	0	1	1	0	0.27	0.3775	0_tan	0.0489	0.73	0.79	0.71	0.84	1	0.19	0.67	1	0.6	0.4	1	0	0
TAGCTATCAACGATAAAACAGGGATTTTGAATATTCCAGATTTGGCAAAGAAATGTAAACAGGAAGAATG	hypothetical protein	SAV0408	Mu50	0	0	0	0	0.48	0.7201	0_tan	0.1987	0.08	0.05	0.08	0	0	0.02	0	0	0.54	0	0	0	0
TAGCTGAACTGCACATTTTGGCAATGACAAATGAACAAGCTAATGGCAAGCGATTTATTGCGACGGCTGA	oxidoreductase, putative	SA0399	COL	0	0	0	0	0.06	1	0_tan	0.4711	1	0.99	1	0.99	1	1	1	1	1	1	0.92	0	0
TAGCTGAAGCTATAAAAGAACAGAGAGAATTAAAAAGATGGTCTCAAGAGGAATTAGCCAATATATTAAA	conserved hypothetical protein	SAP028	N315	0	0	0	0	0.21	0.426	0_tan	0	0.87	0.82	0.71	0.97	1	0.43	0.93	0.94	0.64	0.89	0.94	0	0
TAGGAATGAAATTATACGCGAGTATGATTTCACACCTTCGACGTTTGTAAATGGCGGTTATAAAATGTAG	transposase, putative, degenerate	SA1855	COL	1	0	0	0	0.25	0.1544	0_tan	0	0.85	0.92	0.79	0.99	1	0.42	1	1	1	0.5	1	0	0
TAGGATCATTATTACAAGAATTATTTAATATCATCTTAGAATCTCACAAAATATCAACTTTGTTTAATTA	hypothetical protein	SA0852	COL	0	0	0	0	0.5	1	0_tan	1	1	0.99	1	0.99	1	0.95	1	1	1	1	1	0	0
TAGGCAGTTTGGTATCAAGATTGATACTATCGGTCATTTTAAATTTACCTGTGTGGGTCGTGTTATTAAA	putative membrane protein	SAR2512	MRSA252	0	0	0	0	0.3	0.7896	0_tan	0.0045	0.9	0.92	0.85	0.99	1	0.7	1	0.89	0.8	1	1	0	0
TAGGCGTATCATTGTTTTTCAATGTAATTATATTACTGCTACTTTTTATTTTTAGTATTTTCATTAAAGA	epidermin immunity protein F	SA1871	COL	1	0	0	0	0.33	0.0151	1_yellow	0	0.29	0.49	0.21	0.71	0.19	0.17	0.73	0.93	1	0.14	0.38	1	0
TAGGTATAAGCATGAGAGACACAGAAAGAAATATATTGAATATTTTTAAGACGTTATTCGACGAATATAC	hypothetical phage protein	SAR2087	MRSA252	1	0	0	0	0.21	0.706	0_tan	0.2589	0.97	0.95	0.98	0.94	0.97	0.98	0.9	1	1	0.6	1	0	0
TAGGTGTCACGTTACGATACATGCACTCTAATGTATCGGTACTCAATGTAGATGATTATGAAAATTCTGT	conserved hypothetical protein	SAR2545	MRSA252	0	0	0	0	0.23	0.8618	0_tan	0.1618	0.78	0.76	0.73	0.82	1	0.52	0.87	0.45	0.6	0.56	0.86	0	0
TAGGTGTCATTTTGAACAAGACAAAGGTCGATAAATCTTCTAGTTATTATCACTATTATGGAGATGAATA	capsular polysaccharide biosynthesis protein Cap5B	SA0137	COL	0	0	0	0	0.08	1	0_tan	0.0188	0.95	0.96	0.92	0.99	0.84	1	1	1	0.95	1	1	0	0
TAGTAAATTACTTGAAAAATTTTATAGTTTTTTGGTAACACGTATTAAAAAGAGAGGAATATTCTTTATC	hypothetical protein	SA1508	COL	0	0	0	0	0.37	0.0344	0_tan	0	0.79	0.91	0.63	1	0.38	0.97	1	1	1	1	1	0	0
TAGTAATAACGGTTATAAGGAATTGACAATGGATGGAAAACACACTGTGCCTTACACGATCTCAGTAGAT	ORFID:SA2006~hypothetical protein, similar to MHC class II	SA2006	N315	0	0	0	0	0.13	0.6731	0_tan	0.3719	0.97	0.98	0.96	0.99	0.98	1	1	1	0.77	0.83	1	0	0
TAGTATTATATTTAGAAGAGGTTCCTAAGTTTATTTCTAATCTTAAAGAGCGACTGAACTACTCAGTTCA	ORFID:SAS077~hypothetical protein, similar to transposase for IS232	SAS077	N315	0	0	0	0	0.42	0.2323	0_tan	0.0002	0.73	0.82	0.65	0.93	0.41	0.98	0.89	0.2	0.17	0.5	0.92	0	0
TAGTATTATTAGCTGTTTTTATTAGCGCGTGTGGTATGAAAGAAGATAAACAAATTAAAGAAAATTTCAA	hypothetical protein	MW2408	MW2	0	0	0	0	0.28	0.0089	1_yellow	0	0.33	0.54	0.18	0.87	0.14	0.09	0.81	1	0.22	1	1	1	0
TAGTCATAAGATATCGGAACAAGAATTTATAAGAGTTAAAGATCGATTTGGTGAACCAGAATTAAAAGTG	putative membrane protein	SAR0284	MRSA252	0	0	0	0	0.23	0.8778	0_tan	0.8768	0.66	0.64	0.64	0.66	1	0.3	0.68	0.53	0.45	0.38	0.33	0	0
TAGTCTAGCAAATACACATTTGGAACAACCCCAAAAATACAAGGCACATTTTAAAAAAATACCAATCGAA	hypothetical protein	SA0076	N315	0	0	0	1	0.44	0.0126	1_yellow	0	0.92	0.77	0.96	0.46	0.98	0.93	0.83	0.6	0.75	0.2	0.4	1	0
TAGTGAAGACGCTATGATCAGGATGACACGTATTATAGAATCTTTCGATAGAGAAACGAATCAACGTATC	hypothetical protein	SA2495	COL	0	0	0	0	0.15	0.6844	0_tan	0	0.85	0.88	0.76	0.97	0.59	0.98	0.9	0.57	0.95	1	0.95	0	0
TAGTGCTAACGTACAAATTGTGATATTTTTACATAGTTGTTTAATCATTAGTAATCCGCCCTTTCAATAT	hypothetical protein	SA2005	COL	0	0	0	0	0.31	0.0114	1_yellow	0	0.7	0.87	0.52	0.97	0.35	0.9	1	1	1	1	0.67	1	0
TAGTGTGTTCCACTGCTGATTTCTTTTTGAGCATTATAGGCGGTATGTTGGAAGAAAAGAACAAAAGTTT	hypothetical protein	SA2466	COL	0	0	0	0	0.3	0.2494	0_tan	0.0002	0.9	0.95	0.83	0.99	0.63	0.98	1	1	1	1	0.91	0	0
TAGTTCCAAAGGTCAATCGAAATTGATAAAAGGAACGTTAAGTCAAAACAAGAAAGGTTTTGCTTTCCTA	putative ribonuclease R	SAR0836	MRSA252	0	0	0	0	0.24	0.2297	0_tan	0.0077	0.81	0.88	0.77	0.92	1	0.47	0.95	0.75	1	0.75	1	0	0
TAGTTCGCGCTTTAAATAGAAATGTAGTTACATGTCATTCTGAATTAGTGGATATTAATGTTAGTGGTGT	homoserine kinase	SAR1340	MRSA252	0	0	0	0	0.16	0.8365	0_tan	0.0007	0.86	0.87	0.78	0.95	1	0.61	1	0.67	0.58	1	1	0	0
TAGTTGAAGGCGTTAAGTCATCACAAAATGCTGTGCTCTTCTTTGACGAAATTCACCAAATCATCGGTTC	putative ATP-dependent protease ATP-binding subunit ClpL	SAR2628	MRSA252	0	1	0	0	0.18	0.6893	0_tan	0.0041	0.84	0.87	0.78	0.93	1	0.62	1	0.69	0.7	0.75	1	0	0
TAGTTGCTAAAGCTATGACAAATATCACGAATGATAGAACAAATCAGCAAGTTAATGACTCAACAAATCA	putative surface anchored protein	SAR1841	MRSA252	0	0	1	0	0.18	0.8684	0_tan	0.5063	0.75	0.77	0.73	0.78	1	0.48	0.75	0.62	0.47	0.56	1	0	0
TATAAAAAATACGATGCTGAAAAAGGTTCGAAGTTATTGCAAATTGCAATTATCGTAACAATAATTGCTT	conserved hypothetical protein	SA0285	COL	0	0	0	0	0.02	1	0_tan	0.498	0.99	0.99	0.98	1	1	1	1	0.93	1	1	0.95	0	0
TATAAAAACAGGTGTACTTTCTTTCATAGCATTTGTTGGTGCAATCATTCTTATAGCTTTGATTAGTATG	putative membrane protein	SAR2791	MRSA252	0	0	0	0	0.18	0.5728	0_tan	0.0001	0.81	0.85	0.72	0.93	1	0.5	0.96	0.82	0.6	0.82	1	0	0
TATAAAACGTCAAGAACGACAAAACAAGCGAGAAGAATTACATCGAATAGAGTTTGATAAGCATTTAGAA	hypothetical protein	MW0755	MW2	1	0	0	0	0.41	0.083	0_tan	0	0.3	0.45	0.09	0.84	0.28	0.16	0.79	0.77	0.33	0.2	0.75	0	0
TATAAAGACATGACGCAGGAAGAAATAAAAGACTTATTATCTGAAAAAACGGCAGAATTGTATGAATTAG	hypothetical protein	SA1798	N315	1	0	0	0	0.22	0.7936	0_tan	0.0006	0.91	0.93	0.85	0.99	0.81	0.98	1	0.85	0.92	0.9	1	0	0
TATAAAGATAGTATCATCGATATTATGGCTGATATGTTAGACTATTCTCCAGCTCAAATTGAGGCTTATA	aerobic glycerol-3-phosphate dehydrogenase	SAR1276	MRSA252	0	0	0	0	0.18	1	0_tan	0.0858	0.83	0.83	0.78	0.88	1	0.52	1	0.7	0.67	0.7	1	0	0
TATAAATTTATCAACTATAACTAAAAATGATAAAAGATTTAACGCCACTGATGACCGAATTAATATTATT	hypothetical protein	SA0060	COL	0	0	0	0	0.38	0.0204	1_yellow	0	0.58	0.76	0.28	0.99	0.43	0.45	0.92	0.86	0.95	0.83	1	1	0
TATAACATATAACGAAAAGCAACAGTTACTGTCACAAATTGTGTCACAAGAATATTTAAATCATGACAAA	siroheme synthase, putative	SA2638	COL	0	0	0	0	0.06	1	0_tan	0.103	0.98	0.99	1	0.97	1	1	0.97	1	1	0.78	1	0	0
TATAATAATAACTCTAGTAAAGGGAAAATAATTTTATTTCCTTCATTAAAAAACTTTTGTTTCACAATAT	conserved hypothetical protein	SA0653	COL	0	0	0	0	0.28	0.3729	0_tan	0.0003	0.73	0.79	0.65	0.89	1	0.03	0.85	1	1	1	0	0	0
TATAATAATGTTGAAACATGAAGCTCTTGAACACTATCTAATGAATAAGTATAATTTACACTATATAGAG	hypothetical protein	SAR1319	MRSA252	0	0	0	0	0.41	0.7183	0_tan	0.0064	0.66	0.7	0.59	0.81	1	0.09	0.79	0.2	1	0.33	0.38	0	0
TATAATAGAGTAAAAATGAAATCTTTTTATTATATTATAGACAAGTATAAAAAAGGTATAGTAATATATG	hypothetical protein	SAS060	N315	1	0	0	0	0.35	1	0_tan	0	0.8	0.81	0.62	0.95	0.96	0.54	0.88	0.73	0.8	0.71	0.85	0	0
TATACAAAAACATCACAATTTGTAGTTTAGCAATATCTACTGCATTAACTGTATTTCCGGCAACTTCTTA	ORFID:SA1812~hypothetical protein, similar to synergohymenotropic toxin pre	SA1812	N315	0	1	0	0	0.21	0.7083	0_tan	0.0077	0.8	0.83	0.75	0.9	0.55	1	0.89	0.73	0.45	1	0.86	0	0
TATACAACAATTTCCAGAGAATGATAGCCCTTCTTATATGGTATACAACACTGATATTACAGCATTTATT	hypothetical protein	SAVP022	Mu50	0	0	0	0	0.35	0.8628	0_tan	0.0007	0.69	0.7	0.59	0.85	0.82	0.51	0.88	0.7	0.42	0.5	0.85	0	0
TATACGCGAGTATGATTTAACACCTTCCGCGTTAGGGAAATGGATAAAGCAACATCAAAACACAGGTTGA	truncated transposase	MW0050	MW2	0	0	0	0	0.24	0.442	0_tan	1	0.99	1	1	0.99	1	1	1	1	1	0.86	1	0	0
TATACTAATATTTCATATCTAAAAGAATTAAAAGGTTATATCGAAAATGATATTTTAGATAAGATGAAAT	hypothetical protein	SA1859	COL	1	0	0	0	0.2	0.0515	0_tan	0.1114	0.11	0.23	0.13	0.23	0	0	0.05	0.86	1	0	0	0	0
TATACTCTGTGCCCTATTTGTGATTTTCTTCATTCCATATATGGAGAAGAAAGACAAAAAGAAGAAATAA	hypothetical protein	MW2077	MW2	0	0	0	0	0.14	0.4985	0_tan	1	1	0.98	0.99	0.99	0.99	1	1	1	1	1	0.88	0	0
TATAGAAAAAAATAATTATGATAAGGTTATTTCATTCATAAAAATTAACGACTCAAATTATAGACTTAGT	hypothetical protein, similar to transcriptional regulator	MW0066	MW2	0	0	0	0	0.31	0.0233	1_yellow	0	0.19	0.35	0.14	0.52	0.08	0.02	0.36	0.92	0.95	0.14	0.31	1	0
TATAGATAATGGATGGTTACCTAACAAAGATTTAGCTACTTTAGCAGGACCAATGATTACTTATTTAATC	PTS system, mannitol-specific IIBC components	SA2146	COL	0	0	0	0	0.07	0.2073	0_tan	0.0189	0.94	0.97	0.92	0.99	0.83	1	1	1	1	1	1	0	0
TATAGCCCAACCAAAATTTAAATACGGAGCTAATAAATTTGAGTTTAATCAAACGGTACAAAAAGTTCAG	hypothetical protein	SAV0902	Mu50	1	0	0	0	0.37	0.1316	0_tan	0.3841	0.68	0.55	0.64	0.57	0.54	0.82	0.14	0.4	0.5	0.14	0.75	0	0
TATAGCGTCTATTGATTTGACAGATTTAATGAAAATATCTTTAAGAGGAAATGAAAACCAATTGCAAAAA	replication initiation protein, degenerate	SA0132	COL	0	0	0	0	0.33	0.0297	0_tan	0	0.54	0.72	0.23	0.99	0.39	0.33	0.96	1	0.89	1	0.83	0	0
TATAGGGGAAGTTGTTGATTATACTGAAAACACTCCTAAATCATATGATCCTATGAAGCAATTTTATGTA	uroporphyrinogen III methylase SirB, putative	SA2396	COL	0	0	0	0	0.19	0.0141	1_yellow	0	0.42	0.6	0.22	0.81	0.26	0.18	0.97	0.29	1	1	0.63	1	0
TATAGTGCTTATATTGCCTCAGGATTAACTTCAAGTCAGGTGTTTTTTAGTACATTGAGTGGATCTTTAA	conserved domain protein	SA0049	COL	0	0	0	1	0.47	1	0_tan	0.0084	0.06	0.05	0.02	0.17	0.08	0	0	0.14	0	0	0.25	0	0
TATATAAATACAGGAGATGAAGGAAATCAGTTTAATAGTAGCATAGGATATAAGGAAGAAAAAATAGGGC	putative exported protein	SAR1886	MRSA252	0	0	0	0	0.25	1	0_tan	0.0004	0.94	0.95	0.88	1	1	0.8	1	0.85	0.9	1	1	0	0
TATATAATTTCTTTTCGTCAATTTTATGGCTGATTGGTGGTATTTTGCTGATTTGGAATAAATACTCAAA	hypothetical protein	MW0098	MW2	0	0	0	0	0.22	0.0177	1_yellow	0	0.49	0.66	0.3	0.9	0.35	0.22	0.85	1	0.95	0.57	1	1	0
TATATAGAGATAAGAAGTTTAGACGATGTTGATAAAAATATTGATAAAGTTTTGCATAAAATCAGTATCC	conserved hypothetical protein	SA0383	COL	1	0	0	0	0.23	0.055	0_tan	0	0.83	0.71	0.9	0.59	0.99	0.71	0.4	0.6	0.77	0.64	0.64	0	0
TATATAGTAAACGCATTTATCAAAATTTAACATTAGACTCTATTGTTTTTAGAAATACATTGAGATATAC	membrane protein, putative	SA2520	COL	0	0	0	0	0.16	1	0_tan	0.0759	0.88	0.89	0.84	0.93	0.56	0.98	1	1	1	1	0.8	0	0
TATATCAGCAATTGGTATACTCAGCCTCATAATTTTCCTTAGTGTGTATATGGCAAATAAGTTTTTATAA	ORFID:SA2495~hypothetical protein, similar to hypothetical protein	SA2495	N315	0	0	0	0	0.11	1	0_tan	0.105	0.95	0.95	0.93	0.98	0.87	1	0.96	1	0.95	1	0.93	0	0
TATATGCTACTCAATTTCTGATGAAAAAATACAATATACCAGTAAAATCAATATTAGGTTTTGGAGATAG	conserved hypothetical protein	SA2005	N315	0	0	0	0	0.08	0.4979	0_tan	1	1	0.98	0.99	0.99	0.99	1	1	0.88	1	1	1	0	0
TATATGTAATCTTGATTCCAATTTTGACTATTTTAGCTAGTTTAATCAATTTAATTTGTGATATTAAAAA	hypothetical protein	SA2282	N315	0	0	0	0	0.32	0.0242	0_tan	0	0.68	0.84	0.57	0.91	0.3	0.97	0.89	0.94	1	1	0.82	0	0
TATATTATATCATTTATTTATTATATTTCACGCAATATTAAAGTTCGAGTAAAGCGTTTTTTAGTGGTTT	hypothetical protein	MW2354	MW2	0	0	0	0	0.06	0.343	0_tan	0.0545	0.97	0.99	0.96	1	0.95	1	1	1	0.93	1	1	0	0
TATATTATATCATTTATTTATTATATTTCACGCAATATTAAGACCCTTCCAAAGTATTTTTTAGTGGTTT	hypothetical protein	SAR2520	MRSA252	0	0	0	0	0.34	0.7458	0_tan	0.0088	0.92	0.95	0.88	0.99	1	0.73	1	0.89	1	1	1	0	0
TATATTATTTTTAGATACAATTTTTAGATTAATGTTACCATTTAGTACTTATATTTTTATACTCATCCCA	ORFID:SA1341~hypothetical protein, similar to export protein SpcT	SA1341	N315	0	0	0	0	0.16	0.0731	0_tan	0.0217	0.93	0.85	0.94	0.83	1	1	0.7	0.55	0.29	1	0.5	0	0
TATATTCTTAAGGTGAGGGGTGATTTTATGTTTATGACTGTAAAAGAAGTTGCTCAATTGTTACGTATAA	putative DNA-binding protein	SAR0368	MRSA252	0	0	0	0	0.33	0.809	0_tan	0.0013	0.89	0.87	0.8	0.96	1	0.62	1	0.89	0.73	0.78	0.83	0	0
TATATTTTATAAAAATTGTGACATCATACTTTACTAAGAAACTTTTAGAAATTAAATTTAATTCGAAATA	conserved hypothetical protein	SA1829	COL	0	0	0	0	0.38	0.3185	0_tan	0	0.73	0.81	0.61	0.9	0.13	0.97	1	1	1	1	0.4	0	0
TATATTTTTAGGAAATGAAATCATCCATACACTGACTGTTTTAATAACAACATTATATATTGTTAATTCA	hypothetical protein	MW1045	MW2	1	0	0	0	0.33	0.2119	0_tan	0	0.77	0.85	0.61	0.98	0.56	0.7	1	1	1	1	0.83	0	0
TATCAAAGTATCAATACAGCAAAGAATACTTTAAAAGGTATTGAATGTATTTACGCTCTATATAAAAAGA	IS431mec, transposase	SA0028	COL	0	0	0	1	0.32	0.0295	0_tan	0	0.9	0.77	1	0.56	0.95	0.98	0.54	0.67	0.92	0.5	0.42	0	0
TATCATCTATTCTCCAGCTGGACAGTTAATTAATATTCCGAAGTTAGAAGCGTATTTAATTAAAAGGCAA	hypothetical protein	MW1431	MW2	1	0	0	0	0.41	0.4356	0_tan	0.0006	0.1	0.15	0.07	0.35	0.16	0.02	0.2	0.33	0.09	0.25	0.25	0	0
TATCATGAGTATGGGCACTTACGGCTCTAATAAATCAGAACCGCTGATTACAGGTGGAAATCAATTGTTT	putative membrane protein	SAR0632	MRSA252	0	0	0	0	0.24	0.5878	0_tan	0.0009	0.77	0.81	0.7	0.9	1	0.45	0.9	0.7	0.46	0.5	1	0	0
TATCATTCCGGTATTTTTTGGACATGTTGTAGGATTATTAATACCTAAGTCGTGGATGGATGCTGCCGGT	putative nitrate reductase gamma chain	SAR2483	MRSA252	0	0	0	0	0.24	0.3981	0_tan	0.007	0.91	0.95	0.88	0.99	1	0.77	1	1	0.75	1	1	0	0
TATCATTTCTCAGCCGTTGGTAGCCTTTTACTTCACAACTATAACTATCATGTTAATAGTAATATTTCTT	drug transporter, putative	SA2523	COL	0	0	0	0	0.19	0.1969	0_tan	0.0001	0.22	0.31	0.16	0.42	0.12	0.09	0.56	0.08	1	0	0.29	0	0
TATCCCTCCTTTAGTAGAAAAAGGAATTCATGTTATTGATTTATCTGGTGCATTCAGAATTAAAAACCGT	putative N-acetyl-gamma-glutamyl-phosphate reductase	SAR0185	MRSA252	0	0	0	0	0.26	0.4437	0_tan	0.0197	0.94	0.98	0.93	1	1	0.89	1	0.9	0.89	1	1	0	0
TATCCTCCTTTTTCCTCAACACCCACATTCAGCAGACGGTTATCGCAATGACTATCGAATGTATTTAAAC	hypothetical protein	SA0324	COL	0	0	0	0	0.39	0.4069	0_tan	0	0.49	0.58	0.3	0.9	0.42	0.47	0.95	0.5	0.38	0.71	0.73	0	0
TATCGGTAGAGTATCTAGTCCTACATTAAACATGGTTTACAACAGAGAGAATAACATTAAAGGTTTTAAA	traI protein	VRA0016	Michigan	0	0	0	0	0.26	0.2846	0_tan	0	0.27	0.19	0.34	0.07	0.48	0.14	0	0.14	0.14	0	0	0	0
TATCTAAGATATACATTGAGTTATCGTGATATATCTGAAATATTAAGGGAACGTGGTGTAAACGTTCATC	IS431mec, transposase	SA0028	COL	0	0	0	1	0.26	0.031	0_tan	0	0.91	0.78	1	0.55	0.95	0.97	0.58	0.8	0.94	0.29	0.38	0	0
TATCTCTATCATCATTACTACAACAATTGACCGATATATCATATACGAATAACGCATCGTTTCCTGCATA	putative thiamine pyrophosphate enzyme	SAR0189	MRSA252	0	0	0	0	0.15	0.309	0_tan	0.0008	0.83	0.89	0.78	0.95	1	0.56	1	0.92	0.7	1	1	0	0
TATCTGATGCAGATTGGGAATCGATTGAAGAATTGGCGAGTAAAAAGTATAAAAATTGGGATTGGAATTA	putative lipoate-protein ligase A	SAR0324	MRSA252	0	0	0	0	0.12	0.4762	0_tan	0.4952	0.99	1	0.99	1	1	1	1	1	0.94	1	1	0	0
TATGAAAAATTAATCAATATTGCTCTATTTATTACTGCCACAATTACGGCATTAGTCGTTGTGACAGTTG	FecCD transport family protein	SAR0787	MRSA252	0	0	0	0	0.27	0.8692	0_tan	0.0434	0.69	0.71	0.64	0.79	1	0.27	0.77	0.29	0.33	0.43	1	0	0
TATGAAAGAAAAGGTGTAGAGATAATTGAAGCAGAGGTATGTAAAGATCATATCCATATGTTAGTTAGTA	transposase, IS200 family, degenerate	SA0134	COL	0	0	0	0	0.26	0.0434	0_tan	0	0.54	0.69	0.34	0.94	0.32	0.37	0.92	0.93	1	1	0.73	0	0
TATGAAGAAACCACTTATCACATATTGACGAATGGAGACATCTTAAACCAACCCGGAAATTTGAAATTAT	hypothetical protein	SAR1908	MRSA252	1	0	0	0	0.39	0.8587	0_tan	0.0007	0.7	0.68	0.59	0.87	1	0.25	0.83	0.33	0.38	0.2	0.57	0	0
TATGAGTTTAAAAGCCTAACAGACTACCCAGCTAAAATAAATTCTAATGATATTGATAATCCTTTCTTAG	hypothetical protein	SAVP016	Mu50	0	0	0	0	0.38	0.1036	0_tan	0.001	0.36	0.23	0.38	0.12	0.55	0.16	0	0.27	0.15	0	0	0	0
TATGATTACACGGTTGTGAATGAAATATTTGAAATGAAAGCACCATCAGCTTCTAAAGAAGAGCTTGCAG	conserved hypothetical protein	SAR2735	MRSA252	0	0	0	0	0.17	1	0_tan	0.4573	1	0.99	0.99	1	1	0.98	1	1	1	1	1	0	0
TATGATTATAGCTAATGTCGGTTTAGCATTGGGACCAGAAGAAAAGATTGACTATCCAATTTTATTAAGC	hypothetical protein	SAR2482	MRSA252	0	0	0	0	0.22	0.7607	0_tan	0.001	0.93	0.95	0.89	1	1	0.83	1	0.93	0.8	1	1	0	0
TATGCAACAAGCCAATGACTATTATATTGAACATGGTAACTTCCGAAATTTATTACTTAAATTTAGTTCC	capsular polysaccharide synthesis enzyme Cap8K	MW0134	MW2	0	0	1	0	0.28	1	0_tan	0.0044	0.86	0.85	0.77	0.93	1	0.24	0.86	1	0.25	1	1	0	0
TATGCCATCGTTAATGGTGAAAATTTAGGTCAAGTTGCCAGTCAAACACTTCATAGTATGTATGCAATTA	putative thiamine biosynthesis protein	SAR1793	MRSA252	0	0	0	0	0.39	0.7919	0_tan	0.5736	0.9	0.89	0.88	0.92	1	0.76	0.89	0.89	0.78	1	0.6	0	0
TATGCTCGAAGGTTTGGTGAAATATTCAATTCCGATTACCCTCGTAACATTTGTATTAGGGTTAATCATT	transport system membrane protein	SAR2503	MRSA252	0	0	0	0	0.25	0.5926	0_tan	0.0568	0.9	0.93	0.88	0.96	1	0.77	1	0.89	0.88	0.71	1	0	0
TATGCTTCTTTTTCAATTGAGTATAGAGTATTAGCAAGACGTAGTAAGTATATGAGACAACTTCTACAAT	hypothetical protein	MW0203	MW2	0	0	0	0	0.1	0.4137	0_tan	0.0075	0.96	0.98	0.94	1	0.89	1	1	1	0.95	1	1	0	0
TATGGATATTAAAGGATACGCCAATCTATATCAAAAGGATATAGGTAAAGATGTAAGTATGATTGAACAG	hypothetical protein	MW0754	MW2	1	0	0	0	0.34	0.647	0_tan	0	0.13	0.16	0.05	0.35	0.06	0.05	0.42	0.58	0.18	0	0.13	0	0
TATGGGCTTTATAGCTGCTTTCTTATCTTCGATTATGAACAACATGCCAACTGTTTTAATAGATGCAATA	arsenic efflux pump protein	SAP017	N315	0	0	0	0	0.32	0.6085	0_tan	0.606	0.72	0.68	0.69	0.73	1	0.28	0.79	0.33	0.42	0.57	0.69	0	0
TATGTAGATAAATATGAAGATATAAAAGCACGTTTAACTTTATACTCATATATTGATAAGCAAGCAGTAC	Ser-Asp rich fibrinogen-binding, bone sialoprotein-binding protein	SA0521	N315	0	1	1	0	0.32	0.4118	0_tan	0.4037	0.68	0.62	0.68	0.61	0.14	0.95	0.69	0.25	0.42	1	0.5	0	0
TATGTATGTTTTATTAATAAGTCCGCTGGTATTTCTTTGTTTTGCTATTTTCACAGTCTTATTCGCCAAA	epidermin immunity protein F	SA1872	COL	1	0	0	0	0.36	0.0764	0_tan	0	0.38	0.53	0.3	0.75	0.29	0.2	0.82	0.93	1	0.17	0.5	0	0
TATGTGCGGAACCAACTTATTTTAAGAATACAGAAAACTGCGTGAATCAAAAACAATGGATTCAATTTTG	truncated replication protein for pUB110 plasmid	SA0028	N315	0	0	0	1	0.42	0.0112	1_yellow	0	0.91	0.75	0.93	0.56	0.94	0.96	0.73	0.83	0.77	0	0	1	0
TATGTTAAAATAAACAATGGTGGTACGACTGTGGCAGAGGGAACGGTTAAATCAATAGGACTTCGTTCAA	conserved hypothetical protein	MW0337	MW2	0	0	0	0	0.24	0.4615	0_tan	1	0.99	1	0.99	1	1	0.97	1	1	1	1	1	0	0
TATGTTAAGAAAGTCTTTGTTGAAGATGATAGATTGACTCTAGTTTCACTAAATAAAGATTACGACGATC	ORFID:SA1805~repressor homolog [Bacteriophage phiN315]	SA1805	N315	1	0	0	0	0.2	1	0_tan	0.0022	0.84	0.85	0.77	0.93	0.97	0.67	0.96	0.67	0.79	0.5	1	0	0
TATGTTAATAACTCATTGACTAAAGATTTTCCAAGCAGTAATTCAGGTGTTGATATGAATGATTTTAATG	ORFID:SA1577~hypothetical protein, similar to FmtB protein	SA1577	N315	0	0	0	0	0.1	1	0_tan	1	0.99	0.99	0.99	0.99	1	1	1	0.93	1	0.88	1	0	0
TATTAAAACCAGCACATCAAACCAAAACGCCTGATGATATAAAAAAAGAACTAGATTCTAAAAAGAACGA	hypothetical protein	MW2402	MW2	0	0	0	0	0.36	0.269	0_tan	0	0.68	0.77	0.48	0.96	0.88	0.1	1	0.94	0.58	0.5	1	0	0
TATTAAACAAAACTATTAATATAACAGGTACAATTCACCGCATTAAATACGAGGAAGGATTCGGATACAA	integrase	MW1442	MW2	1	0	0	0	0.35	0.0765	0_tan	0.1543	0.85	0.73	0.83	0.73	1	0.62	0.71	0.71	0.82	0.5	0.5	0	0
TATTAAACAACTCGAAGAGTCTATTATTAAAAACTTCCAAGCATTATCTGGAAAGGAAGTGGATACAAAT	putative type I restriction enzyme methylase protein	SAS0027	MSSA476	0	0	0	0	0.41	0.6206	0_tan	1	0.04	0.01	0.03	0.02	0.05	0.04	0	0	0	0	0	0	0
TATTAAATAAGAATTTACGCGTGTTAAATACTGAACTATCAACTGTAGATTCATCAATAGTACAAGAGAA	hypothetical phage protein	SAS0906	MSSA476	1	0	0	0	0.39	0.0264	0_tan	0.2284	0.81	0.64	0.69	0.8	1	0.52	0.6	0.2	0.17	0.5	0.64	0	0
TATTAAATATAATGATGAATATTTGATGGTGAATATAATAAATAATTGGTTAGTTTTATTCATTCCATTG	conserved hypothetical protein	SA0556	N315	0	0	0	0	0.23	0.1495	0_tan	0.3826	0.96	0.9	0.94	0.91	1	1	0.87	0	0	0.25	1	0	0
TATTAAGTATGAAAGGATATTCATATCATGTAGAACCAAATAGAGAATCTGTTATTGAGGATTCACATAT	hypothetical protein	SAVP015	Mu50	0	0	0	0	0.43	1	0_tan	0.415	0.38	0.37	0.35	0.44	0.6	0.16	0.38	0.3	0.2	0.4	0.33	0	0
TATTAATATTATTTTGGGTATTATCAAAGTGTTCTCTAGTCTTTTCACAGGAAACTGGCGAGGCGTTTGG	hypothetical protein	SA1766	N315	1	0	0	0	0.37	0.1404	0_tan	0	0.5	0.63	0.39	0.82	0.39	0.55	0.84	0.7	0.38	0.6	1	0	0
TATTAATGCGCAATGGGTTGAGTATCCAGAAGACTGGGCGTCAGAGGTTTTGAGAGAAGTAAGAGAGCTT	hypothetical protein	SAV1976	Mu50	1	0	0	0	0.28	0.3229	0_tan	0	0.79	0.85	0.68	0.99	0.93	0.55	0.95	0.85	0.79	1	0.92	0	0
TATTAATGTTAACAATTATGAATTTGAATTTTGAATTAAATGAAGTGTCTGATTATATCACTGTATTAAT	epidermin biosynthesis protein EpiC, authentic point mutation	SA1876	COL	1	0	0	0	0.28	0.0217	1_yellow	0.0009	0.17	0.33	0.16	0.4	0.06	0.02	0.38	0.86	1	0	0.15	1	0
TATTAATTTATTACTTTTTTATCCTATCTTATCTACATTTTCAAATATTATAATACATATTGACCATTTT	hypothetical protein	SAS011	N315	0	0	0	0	0.1	0.235	0_tan	0.235	0.98	1	0.98	1	0.97	1	1	1	1	1	1	0	0
TATTACAATGTACTTTGTACCATTTGAATCTCGGAAAATGCCACTATTTATGACGATAATTTTTACAATC	hypothetical protein	SA2191	COL	0	0	0	0	0.24	0.0025	2_orange	0	0.56	0.77	0.33	0.98	0.49	0.15	0.92	1	1	1	1	1	0
TATTACTGGGATTTTAAAAAACATTGGTAACATCGCAGCTTATAGTACTTGTGACTTCATAATGGATGAA	accessory gene regulator protein D	SA2024	COL	0	0	0	0	0.25	0.0027	2_orange	0	0.39	0.63	0.16	0.91	0.26	0.07	1	0.5	1	0.6	1	1	0
TATTAGAAACCATTAAAAAATATAACAGTCATATAAAACGATTCATCTTTGCATCATCTGCAGCCGTTTA	NAD dependent epimerase/dehydratase family protein	SAR0130	MRSA252	0	0	0	0	0.21	0.3366	0_tan	0.0105	0.8	0.86	0.77	0.91	1	0.61	0.94	0.78	0.57	0.67	1	0	0
TATTAGATAAAGAAAATAGTAAAATACATCATTTAGCTTATATAAACCCTAAAAAAAGCGATATGACCTC	fibronectin-binding protein homolog	MW2420	MW2	0	1	1	0	0.23	0.2658	0_tan	0.3952	0.05	0.1	0.06	0.1	0.02	0.02	0	0.73	0	0	0.08	0	0
TATTAGTATTAACACACCCAAGATATTATAAAACATCACAAAAACACCACTATCTAATTTATCTCAATAA	hypothetical protein	SA0112	COL	0	0	0	0	0.12	0.6866	0_tan	0.1091	0.98	0.96	0.95	0.99	0.92	1	1	1	0.95	1	0.94	0	0
TATTAGTTATAGTCAACTCATTAACTCATTTTCTAACTCTAAACACCTCATTTTTTAATAGTTCAGCATC	hypothetical protein	SA1753	N315	1	0	0	0	0.06	0.4889	0_tan	0.4889	0.99	1	0.99	1	0.98	1	1	1	1	1	1	0	0
TATTATAAGCGAACTATAAAAATTTCAGGTCTAAAAGCAATGTATGCTCTTAAGTCAAAAGACTTTAAGA	hypothetical protein	SA1754	N315	1	0	0	0	0.09	0.2465	0_tan	0.4982	0.98	1	0.98	1	0.98	0.98	1	1	1	1	1	0	0
TATTATAATAGACCGTTCTTTGAGTATACAAATCAGTCAGGATATAAAGAGGAAGGAAAAGTGACGTTTA	exotoxin 3, putative	SA0478	COL	1	1	0	0	0.34	0.4643	0_tan	0.0003	0.22	0.28	0.16	0.43	0.12	0.06	0.5	0.14	1	0	0.27	0	0
TATTATGATGAACAAAAAGAAAGAATAACGATTTATATGAAGTACAATGTGAAAGGTTATAAAAATATAA	hypothetical protein	SA1857	COL	1	0	0	0	0.2	0.4409	0_tan	0	0.8	0.85	0.67	0.98	1	0.27	1	1	1	0.71	0.91	0	0
TATTATTTTGTACTTTAAATTATTTAGTTCCAATGCAAAGTAATGCTTTTTCAATAATTATATATTCATC	hypothetical protein	MW1743	MW2	1	0	0	0	0.3	0.0001	3_red	0	0.27	0.57	0.19	0.8	0.08	0.02	0.85	1	1	1	0.5	1	0
TATTCAAAAAAAGAAAACGGACATATTAGAATTAATGTTGACGATTTAGCAAAAGTAATTGAAGTGTTAG	hypothetical protein, similar to Cro-like protein from Streptococcus pyogen	MW1435	MW2	1	0	0	0	0.41	0.0188	1_yellow	0	0.16	0.33	0.1	0.6	0.11	0.14	0.5	0.5	0.45	0.5	0.56	1	0
TATTCAATTCCTATTACATTAGTTACATTTGTTTTAGGATTGATTATTGCATTATTTACAGCATTAATGC	amino acid ABC transporter, permease protein	SA2411	COL	0	0	0	0	0.06	0.0969	0_tan	0.0105	0.91	0.97	0.89	0.98	0.79	1	1	1	1	1	0.94	0	0
TATTCAGAAAACACTTATTTTTAGGGTTACTTGTGTCTAGTTTAGTTTTTGCATCATTACACGAATCTGA	hypothetical protein	SA1598	N315	0	0	0	0	0.1	0.1718	0_tan	0.0102	0.87	0.93	0.85	0.95	0.63	1	1	1	1	1	0.88	0	0
TATTCCTGTTTTAGAAGATGAAAAACAAGAAGAGAAAAATCATAAAAATATAGCTCAATTAAAATCTGAC	truncated secreted von Willebrand factor-binding protein VWbp	MW0766	MW2	0	0	0	0	0.3	0.0362	0_tan	0.0009	0.2	0.35	0.18	0.43	0.08	0.04	0.23	0.92	1	0	0.29	0	0
TATTCTTCCTTGCAAATCTATTCTTAGAACCTACTAAACTTGGTTACTTAATCATTATTATTTTAGGTGT	spore cortex protein homolog	MW1697	MW2	0	0	0	0	0.06	0.6239	0_tan	0.334	0.91	0.93	0.9	0.94	0.77	0.98	1	1	1	1	0.78	0	0
TATTGAATTTACTTTCGTGGAGAAAAAAGGTGAAAATATATACTTTAGTGATAGTCTACATCTTGAACCA	hypothetical protein	SA0092	N315	0	0	0	0	0.12	0.2394	0_tan	0.4992	0.98	1	0.98	1	0.97	1	1	1	1	1	1	0	0
TATTGAGTATCGTTTTAGCAATTACATTCGTAGAAACACTAGGGAATAGCGGTATGCTTCGTGAGAGTAT	putative membrane protein	SAR0342	MRSA252	0	0	0	0	0.13	1	0_tan	0.6082	0.8	0.8	0.78	0.81	0.99	0.59	0.88	0.67	0.5	0.56	1	0	0
TATTGATTATCCGATAGCGATTGTTTTTCAAGCATCTTGTTTTAATGAATTCGTCGTTAAAGGGCGCTTA	tetrapyrrole (corrin/porphyrin) methylase family protein	SAR2487	MRSA252	0	0	0	0	0.21	0.621	0_tan	0.6278	0.99	0.97	0.97	0.99	1	0.98	1	0.9	0.8	1	1	0	0
TATTGCTTTCGGCGATGGCACATTGACATTACAAGATGCCCTAAATGTTACGGGTAGCGTTCATGATGAA	DNA polymerase III, tau subunit	SAR0477	MRSA252	0	0	0	0	0.16	0.2803	0_tan	0.001	0.78	0.85	0.73	0.91	1	0.52	0.96	0.8	0.5	0.67	1	0	0
TATTGGAAGGAGAGGAAGAGTTTTTCTACTCTGATTGCACCCAAAAACCAATTGATAATCAATTTTTACT	vancomycin resistance protein VanH	VRA0039	Michigan	0	0	0	0	0.39	1	0_tan	0.0362	0.03	0.03	0.01	0.09	0.04	0.02	0.13	0	0	0	0	0	0
TATTGGTCTTGATGAAGCAGTAGGGATTATGACGGGTCAAGTTGTCTATAAATATGAGGAGGAACAGGAA	hypothetical protein	SAV0875	Mu50	1	0	0	0	0.03	1	0_tan	1	1	0.99	0.99	1	1	0.98	1	1	1	1	1	0	0
TATTGTGAGGGAATTATGGGAAGATAAAAAAGGATACTCACGTAGTAAAGAAAAAGAATATCCAGTGAAA	hypothetical protein	SA2275	N315	0	0	0	0	0.28	1	0_tan	1	0.76	0.76	0.76	0.76	0.36	0.98	0.86	0.78	1	0.2	0.45	0	0
TATTTAACAAGGTCTTTTCTCGAATATTGGCATATCAATTTAACTTTTTAAATAGTCATCAAAAAGATAA	hypothetical protein	SA1521	COL	0	0	0	0	0.57	0.2047	0_tan	0	0.6	0.73	0.39	0.84	0.33	0.9	0.82	0.63	1	1	0.58	0	0
TATTTACTTACTATCATTTACATTGTTACTAGTAAGTAGTATTATCATTTCATTTGGTATTAAATTGCCG	putative multidrug transporter	SAV2168	Mu50	0	0	0	0	0.1	0.2219	0_tan	0.0004	0.89	0.94	0.85	0.98	0.72	0.98	0.97	1	1	1	0.88	0	0
TATTTAGCTGGTGGTATTAATGTTCAGAAATTTAAAGAAACACTTGCGTTAGATGATATGGATTTATACA	hypothetical protein	SA1774	N315	1	0	0	0	0.15	0.5353	0_tan	0.7538	0.96	0.94	0.94	0.96	0.99	1	0.92	0.67	0.87	0.6	1	0	0
TATTTATACAAAATTAAAGATAACAACGATAATAGTCTAAAGAATTTACATGAAATGATTTATGAAAGCG	hypothetical protein	MW1742	MW2	1	0	0	0	0.28	0.0012	3_red	0	0.31	0.56	0.17	0.82	0.13	0.04	0.83	1	1	1	0.38	1	0
TATTTATCTGTAGTTGAATCATTAAAACATGCCGGATATCCTTTCGCTAAAGATATTGATATTAGATGGA	putative CTP synthase	SAR2215	MRSA252	0	0	0	0	0.21	0.6831	0_tan	0.0365	0.85	0.87	0.81	0.92	1	0.61	0.95	0.88	0.64	0.86	1	0	0
TATTTATTGGTTTAATATTGCTTGTAGTAAGTTTAGTGACAAGATTTATAAAATTAAATAGCCATCAATA	truncated hypothetical protein	MW2515	MW2	0	0	0	0	0.18	0.4517	0_tan	0.1332	0.9	0.93	0.88	0.95	0.81	1	1	1	0.64	0.83	0.86	0	0
TATTTATTTTATATGTTAACCATATATTTATTGCTGGAACGTTATATGCATTAGATATTTATACGATTGA	fmtC protein	SA1396	COL	0	0	0	0	0.14	0.4791	0_tan	0.0573	0.88	0.92	0.86	0.94	0.61	1	0.97	1	1	1	0.78	0	0
TATTTCATCATTCATTTAAATTATGTTTATATCAATATCGATTTTTGGGTCATCATGGTTATTATAGGGT	hypothetical protein	SA1971	N315	0	0	0	0	0.03	0.4807	0_tan	1	0.99	1	0.99	1	0.98	1	1	1	1	1	1	0	0
TATTTCTGTAAATATATCTTTTTCAGGGGATCGATATAAACTAACTGATCATGGTGAAACTTTATGGAAC	hypothetical protein	SA1636	N315	1	0	0	0	0.31	0.8681	0_tan	0.0457	0.66	0.68	0.61	0.76	0	0.98	0.88	0.58	0	1	0.29	0	0
TATTTGTAGGTTCGATTGTAATTGGCGGATATTCACTATTTAAAGTTGGTTTTCAAAATTTGATACGCTT	probable cadmium-transporting ATPase	SAR0723	MRSA252	0	0	0	0	0.33	0.5973	0_tan	0.7207	0.75	0.7	0.74	0.71	1	0.48	0.69	0.33	0.54	0.5	0.5	0	0
TATTTTAACAATATAAATATTAATAGTATAATGGCTTTAAATGATAATAATTATCAATTTGAGCACGTTA	hypothetical protein	SA2370	COL	0	0	0	0	0.07	0.21	0_tan	0.2226	0.98	1	0.98	1	0.96	1	1	1	1	1	1	0	0
TATTTTATTAATAAAGAGTATTCGAATAAAAATACCCTGTTTTATAAATTGATTGGCGATAATATCTTTA	conserved hypothetical protein	MW2447	MW2	0	0	0	0	0.24	0.0027	2_orange	0	0.45	0.68	0.25	0.96	0.17	0.1	0.93	1	1	1	1	1	0
TATTTTCCCTACACCAATTGTTGGTATGGTAGGTCTGATTGAAAACGTAGACTATTTAAATGATTTTCAA	putative phosphoribosylformylglycinamidine synthase II	SAR1043	MRSA252	0	0	0	0	0.3	0.6392	0_tan	0.1128	0.6	0.56	0.63	0.51	1	0.33	0.31	0	0.25	0.29	0.22	0	0
TATTTTTTTCTTCATAGTTTATGTGTTGTGTATCAGTTGTTTTAATAGCGATAAGCACGATAAAAATAAA	hypothetical protein	SA2568	COL	0	0	0	0	0.03	1	0_tan	0.4936	1	0.99	0.99	1	0.99	1	1	1	1	1	1	0	0
TCAAACAATATTTATTTGATAATACCAGAGCTGTTTTTGGGTTTAATTTCTTTTTAGATAAAAAGCAGTT	capsular polysaccharide synthesis enzyme Cap8I	MW0132	MW2	0	0	1	0	0.2	0.2735	0_tan	0	0.76	0.83	0.65	0.96	1	0.21	0.92	1	0.38	1	1	0	0
TCAAATCCAAGGTCAAAATAATGGTAACCAGTCATTCGAAGAAGATACAGAGAAAGACAAACCTAAGTAT	fibronectin-binding protein homolog	MW2421	MW2	0	1	1	0	0.25	1	0_tan	0.0001	0.85	0.86	0.76	0.96	0.32	0.98	1	1	1	1	1	0	0
TCAAATGTACAACGAGATTGCGAATAAGATTAGTAGCATGATACCAGTAGAGTGGGAAAAAGTATATACA	conserved hypothetical protein	SA0286	N315	0	0	0	0	0.02	0.2261	0_tan	0.4979	0.98	1	0.98	1	0.97	1	1	1	1	1	1	0	0
TCAAATTAAACGATATTCAAAACCATACATTACTTGTTACTGAAAAAGGGTGTAGTTACAGAGAACAGTT	conserved hypothetical protein	SA0072	COL	0	0	0	0	0.33	0.0072	1_yellow	0	0.37	0.59	0.21	0.89	0.2	0.05	0.83	1	0.95	0	1	1	0
TCAAGAACAATACAATGAGCAAATACAAAAAATTAAAAGTAATATTGAATAAAAATAAAGACAATAATAC	truncated hypothetical protein	SAVP020	Mu50	0	0	0	0	0.36	0.6111	0_tan	0	0.62	0.67	0.44	0.91	0.77	0.38	0.83	0.75	0.45	0.6	0.77	0	0
TCAATAATTACGGCAAATGTCAGATACGATAACCGACTTACTGACAGCGAAAAGTTACTTTTTGCAGAAA	hypothetical protein	SAV0868	Mu50	1	0	0	0	0.52	0.6618	0_tan	0.0001	0.21	0.26	0.14	0.52	0.28	0.07	0.44	0	0.55	0.33	0.5	0	0
TCAATACTTCATCCCTCCCACAATCTGCACAAAATCAAATAAGTGAACTTTCTAAACAGAAAGATTCAGG	hypothetical protein	SAVP008	Mu50	0	0	0	0	0.46	0.4401	0_tan	0.0026	0.03	0.06	0.01	0.17	0.05	0	0	0	0	0	0.57	0	0
TCAATATGTAGAAACAGGTAAAGATACTGCAACATTATATCTTTCTTCTGCATATACAAAAACAATAGCT	hypothetical protein	SA1854	COL	1	0	0	0	0.25	0.0045	2_orange	0	0.4	0.61	0.25	0.85	0.33	0.14	0.86	1	1	0.38	0.69	1	0
TCAATCAGCACAAACTAAAGGTGTAAAAAAAGAAACTAAAGACATTAAACTTTATCAAGACGTAGATAAT	traH protein	VRA0015	Michigan	0	0	0	0	0.34	0.6248	0_tan	0	0.65	0.61	0.48	0.8	0.82	0.32	0.83	0.54	0.4	0.56	0.69	0	0
TCAATCCATTCATCTATTGCTTGGTTGAATAAGTCTGATGCCATATCTAAGTCATTCTCATCTACGACAT	hypothetical protein	SAV0861	Mu50	1	0	0	0	0.16	0.822	0_tan	0.1765	0.9	0.88	0.86	0.92	0.94	0.86	0.85	0.85	0.71	1	1	0	0
TCAATCGATACATCACAAGAGGTATTAGTGAATACCTATCTCTAGACCTTCAAATCTTACTTTGGAATAT	conserved hypothetical protein	SA0055	N315	0	0	0	1	0.41	0	3_red	0	0.87	0.53	0.95	0.13	0.86	0.92	0.13	0.57	0.5	0	0.29	1	0
TCAATGCAAACATTATTTATTGCACTTGTACAAGGGCTACTTATTACAACAAAGCAACTATCTGCAGCCA	putative siderophore transport system permease	SAR0116	MRSA252	0	0	0	0	0.17	0.4921	0_tan	0.2276	0.76	0.81	0.75	0.82	1	0.54	0.84	0.58	0.53	0.56	1	0	0
TCAATTGTGGGCGTTTGTTGCGCCTGGTTTGCATAATAATGAGCGCCAATTTATTTATAAATATAGCTTT	conserved hypothetical protein	MW0322	MW2	0	0	0	0	0.44	0.0307	0_tan	0	0.63	0.81	0.48	1	0.58	0.36	1	1	0.6	1	1	0	0
TCACGTTTGAAACAAAATCAGTTACTGAAAACAAAGTTGTTGGTGATTTAACAATTAAAGGTATCACTAA	conserved hypothetical protein	SA2479	N315	0	0	0	0	0.08	0.3483	0_tan	0.1224	0.97	0.99	0.96	1	0.95	1	1	1	0.93	1	1	0	0
TCACTAAAGTGAATATATTTAAACACATTCATTCAATGATGTGGACAACAATACCTGCGTCAATCATCGG	putative Na1/H1 antiporter	SAR2385	MRSA252	0	0	0	0	0.17	0.7458	0_tan	0.5131	0.74	0.76	0.73	0.77	1	0.49	0.75	0.55	0.44	0.56	1	0	0
TCACTATCAATTTGAAAGACGAGAAAAAGGAAGTAATTGATTTAGGTGATAAACTGCAATTCGAGCGCAT	exotoxin 11	SA0387	N315	1	1	0	0	0.21	0.421	0_tan	0.2118	0.95	0.98	0.95	0.99	0.91	1	1	0.92	1	1	0.93	0	0
TCAGAAAAGTTAGCTGTCACTAAAAATAACTATAAACATTTTTTAGAAAAATATTTTGGACTAGATATAA	hypothetical protein, similar to N-hydroxyarylamine O-acetyltransferase	MW2618	MW2	0	0	0	0	0.44	0.0097	1_yellow	0	0.61	0.82	0.44	0.99	0.29	0.81	0.95	1	0.89	1	0.83	1	0
TCAGATAATCCTGATTTCAATCCAAATAAGCCTCAATATAAAGGTGCATCCATATTAATTACTGGAGATA	3-isopropylmalate dehydratase small subunit	SAR2147	MRSA252	0	0	0	0	0.22	0.5795	0_tan	0.0004	0.91	0.94	0.86	0.99	1	0.73	1	0.9	0.82	0.89	1	0	0
TCAGCTTTTTTCATTGCCTAAAAACTTAATGTCCCGACCTCTTTATCTACGCATAAATACTTATTACTGA	IS1272-related, transposase, degenerate	SA2305	COL	0	0	0	0	0.18	0.0066	1_yellow	0	0.81	0.94	0.73	1	0.82	0.66	1	1	1	1	1	1	0
TCAGTCTAAACGTGCAACGCAATTCCGCACGTGGCCAATATATCTTGCGCTAGATCATGAAAATCATTAA	hypothetical protein	SA0493	COL	0	0	0	0	0.18	0.575	0_tan	0.0828	0.98	0.99	0.97	1	0.92	1	1	1	1	1	1	0	0
TCAGTTTTAAATATACTAAATTCATTTGAGACAATATCAATTTCAGGAAGTGAATCAGCACACGATGTTG	hypothetical protein	SAR2114	MRSA252	0	0	0	0	0.37	0.3726	0_tan	0	0.67	0.74	0.57	0.9	1	0.1	0.83	0.63	0.25	0.5	0.7	0	0
TCATAAAATTAATGGAATTACTATATGGTGCTATATTTTTAGATAAACCACTTAATCCTATAACAAAAAT	hypothetical protein	MW1357	MW2	0	0	0	0	0.46	0.0421	0_tan	0	0.72	0.88	0.54	1	0.18	0.96	1	1	0.94	1	1	0	0
TCATCACATAAAGAAGTTCAAGAACATAACTCAGCATATGAAGAAATTGATATTACTCATTTTGCTGAAG	hypothetical protein	SA0372	N315	0	0	0	0	0.26	1	0_tan	0.029	0.76	0.77	0.7	0.86	0.55	1	0.87	0.6	0.4	0.5	0.82	0	0
TCATCCTCTTATTTAGTAGAAATTAACAACACAAATCTAATTAAAAATATGGTCCACGCTGATAAAGGCT	LysR family regulatory protein	SAR0717	MRSA252	0	0	0	0	0.41	0.8468	0_tan	0.0629	0.75	0.76	0.71	0.85	1	0.46	0.63	0.5	0.57	0.4	0.67	0	0
TCATCGCATACAAGGACAGCTTAATGGAGTCATTAAAATGATGGAGGAAGAAAAAAATTGTAAAGACGTC	conserved hypothetical protein	SA0048	COL	0	0	0	1	0.31	0.0124	1_yellow	0	0.37	0.57	0.03	0.99	0.36	0.22	0.91	0.64	0.42	0.8	0.92	1	0
TCATCGCTAGTCATGTTGGTGGCATTTCGGAATTAGTAACTGATAATGGTATATGTATAGTGAACAATCA	galactosyl transferase	SAR0132	MRSA252	0	0	0	0	0.21	0.314	0_tan	0.0131	0.83	0.88	0.8	0.93	1	0.61	1	0.9	0.7	0.63	1	0	0
TCATTGTCGGTTATTATTGGGGTTACATTTTCATATAAATTAAACGAAGGGATAGCTATTTTTATTGGTA	putative membrane protein	SAR0838	MRSA252	0	0	0	0	0.31	0.6977	0_tan	0.0001	0.82	0.78	0.68	0.93	1	0.29	0.88	0.43	0.29	1	1	0	0
TCATTTTACCTATATTAATTGTTAGTTTATCGGTAATTTTAGTGAGTTGTAATAATAACGATTCAGAACA	conserved hypothetical protein	SAVP006	Mu50	0	0	0	0	0.41	0.4643	0_tan	0.2214	0	0.02	0	0.03	0	0	0.14	0	0	0	0	0	0
TCATTTTTATTTTAGTTGCTGAAAGGTGCGTTGAAGTGTTGGTATGTATGTGTTTTAAAGTATTGAAAAC	hypothetical protein	SAR0030	MRSA252	0	0	0	1	0.23	0.3551	0_tan	0.1531	0.99	0.97	0.96	1	1	0.98	1	0.87	0.91	1	1	0	0
TCCAAAGAACTTAAAGATTTGTTGACAGAAATTACTGATATGTCACCTAGACTATCTCTTTCTGAAAAAT	alkyl hydroperoxide reductase, subunit F	SA0451	COL	0	0	0	0	0.48	0.0674	0_tan	0	0.65	0.8	0.51	1	0.5	0.5	0.93	0.75	1	1	0.91	0	0
TCCAAATGAATCTATTATAGAAAGATTGAAAGAAGCAAACATTAAGCTAATAGGTACAGCAACAAGTGTT	ORFID:SA0781~hypothetical protein, similar to 2-nitropropane dioxygenase	SA0781	N315	0	0	0	0	0.1	0.4907	0_tan	0.4673	0.99	1	1	0.99	1	1	1	1	1	0.8	1	0	0
TCCAAGTTTTTTTCTGGATTTAATACTGGGAAAATATCATTTCATTTGAATGACGGTACATCATTCTCTT	enterotoxin	SAR1920	MRSA252	1	1	0	0	0.36	1	0_tan	0.292	0.66	0.65	0.62	0.71	1	0.39	0.6	0.14	0.14	0.14	0.45	0	0
TCCACTATTTGGGGTATTATATATCTTATTTTAATTATCACTTTTTCTTTGATTAGTATTAGCATTCAGT	hypothetical protein	SA0190	N315	0	0	0	0	0.31	0.4697	0_tan	0.1991	0.78	0.73	0.8	0.7	0.59	0.98	0.89	0.92	0.44	0.33	0.42	0	0
TCCTTCAGGGACGTTGTATGTCACTATAAGTGATGTTTATTCAGGATCTCCGACATTGACCATTGAATAA	hypothetical protein	SAV0911	Mu50	1	0	0	0	0.18	0.4465	0_tan	1	0.93	0.89	0.91	0.91	0.95	0.93	0.91	0.86	0.69	1	0.94	0	0
TCGAAGGAACTTGAACAATCAAATGCTAGTCCTAATGTTATAGGGTACACGCGACGTGATAGTGCGTATT	hypothetical protein	SAV0790	Mu50	1	0	0	0	0.45	0.7276	0_tan	0.1369	0.52	0.49	0.45	0.6	0.92	0.1	0.6	0.13	0.86	0	0.64	0	0
TCGACACCAAGGAATCGGTTCTACCATGCAGTCATTAGTAGGTGAATATGCTTTATCTAGAAATCATAAA	acetyltransferase (GNAT) family protein	SAR2365	MRSA252	0	0	0	0	0.21	0.3817	0_tan	0.0022	0.76	0.81	0.7	0.89	1	0.49	0.89	0.64	0.5	0.57	1	0	0
TCGAGGTAAAGGAGTCATGGTAGTTGCTCCACTAGAAATATTAGATCCATTTAAAGGTATTTTAAAATTT	hypothetical protein	MW1385	MW2	1	0	0	0	0.25	0.0022	2_orange	0.0008	0.79	0.58	0.78	0.53	0.98	0.56	0.31	0.5	0.64	0.5	0.36	1	1
TCGATGGTTGGTATCAAGAAGGAGAAATTTTTATTAGACCTTCCCTATCCGAAAGGAACAAATTAGAAGT	hypothetical phage protein	SAR1557	MRSA252	1	0	0	0	0.39	0.2264	0_tan	0.5748	0.69	0.59	0.66	0.6	0.91	0.43	0.75	0.29	0.33	0.25	0.64	0	0
TCGCAGCAGCTTTAGAAGTGACAGATGTAAATATCTTTAAACCTTCTGGGTTTACAATGGGAATGAATAA	conserved hypothetical protein	SAR1028	MRSA252	0	0	0	0	0.2	0.7354	0_tan	0.0008	0.94	0.96	0.9	1	1	0.76	1	1	0.93	1	1	0	0
TCGCAGTTCATAATCATCCATCCGGTGATGTAACGCCCTCACAAGAAGATATCATAACAACAATGAGGTT	DNA repair protein RadC	SA1707	COL	0	0	0	0	0.01	0.4988	0_tan	0.2364	0	0.02	0	0.02	0.01	0	0.03	0	0	0	0	0	0
TCGCATTCAAAAGTTATTATGGTCTGAACTAAAAATGGGAAATGTTTCAAATGGAAAACCGGAATATATA	hypothetical protein	SA1769	N315	1	0	0	0	0.09	0.6775	0_tan	0.3694	0.97	0.98	0.96	0.99	0.99	1	0.97	0.85	0.93	1	1	0	0
TCGCATTCGGTAAATCTAAAGAAGGTGTAGATTACCAAAGTTTAGATATGCAACCAGCTCATTTATTCTT	fructose specific permease	SA0655	N315	0	0	0	0	0.18	0.1212	0_tan	0.2495	0.97	1	0.97	1	0.96	1	1	1	0.86	1	1	0	0
TCGCTAAAGAAAAAAGTAAATTAAAACTCAATTTACTAAAACATGCAAACAGTAATTTAGAAACAAGAAA	hypothetical protein	SAV0857	Mu50	1	0	0	0	0.36	0.1142	0_tan	0	0.62	0.74	0.31	0.99	0.42	0.62	1	0.83	0.64	0.89	0.93	0	0
TCGGAAAATTTCTAAGTCAAAGTTTTTTGAATAGTAATAATGTAATAAAGCAAGAGATTATAAAAATTAT	hypothetical protein	SA2012	N315	0	0	0	0	0.4	0.8636	0_tan	0.2108	0.6	0.63	0.57	0.69	0.21	1	0.67	0.14	0.13	0.33	0.4	0	0
TCGTTTTTTTATTTCCAACCTCTTCTCATGTTAATTTATTACTTTTTAATCCTATCTTACCTACATTTTC	hypothetical protein	SAR0393	MRSA252	0	0	0	0	0.15	0.0303	0_tan	0.0003	0.83	0.93	0.8	0.97	1	0.61	1	0.91	0.8	0.9	1	0	0
TCTAAAGGATCGTTGGCAGGTGTAGACGGACGACTACAAACACGTAACTATGAAAACAAAGACGGGCAAC	single strand DNA binding protein	SAV0864	Mu50	1	0	0	0	0.29	1	0_tan	0	0.88	0.89	0.75	0.99	0.89	0.85	0.97	0.9	0.7	0.8	1	0	0
TCTAAATTAGTACAACCAATTATGCAGTTATTTATAGATAAAGCTATCCTTAACAACGTCCAAAATGATG	hypothetical protein	SA0450	COL	0	0	0	0	0.17	1	0_tan	0.0065	0.97	0.97	0.93	1	1	0.81	1	1	1	1	1	0	0
TCTAAATTTTCGATTGAAGGTAAAGTTATTAATTTTAATTCAATAGCAAAGGAAGCTAATGTTTCTAAAT	transposase for Tn554	SA0050	N315	0	0	0	1	0.27	0.0894	0_tan	0.0195	0.96	0.89	0.97	0.87	1	0.98	0.91	0.83	0.7	0.5	0.8	0	0
TCTAACTAAACAATTAGATCAACAAAATAGCAATGTTAATACATTAAATAAACTGTTGGAGAATCAACAA	replication-associated protein	SAVP034	Mu50	0	0	0	0	0.34	0.3373	0_tan	0.0312	0.41	0.49	0.38	0.56	0.09	0.72	0.64	0.3	0.6	0.14	0.38	0	0
TCTAATTGGGAAAGAGAAGTAAGTAATCCCGACTTAAAAACAATTTTAGAAATCACTAAATTATTTAATG	conserved hypothetical protein	SAVP004	Mu50	0	0	0	0	0.42	0.1446	0_tan	0	0.15	0.26	0.01	0.62	0.21	0.1	0.4	0.33	0	0.2	0.5	0	0
TCTACAGAAAAAGCCGTAGATAGTGTTGGGAATGTTGTTGGTGAAGGTTCAAAAAGTATTTCTAATCATA	hypothetical protein	SAR0604	MRSA252	0	0	0	0	0.23	0.1036	0_tan	0	0.84	0.93	0.78	1	1	0.58	1	0.92	0.8	1	0.92	0	0
TCTACATTAGCCCAACCATCTCCATTTGTATCTGCGCTATTTGGTAAGTTCTCTCCGTATACGGTTTTGG	hypothetical protein	SAVP007	Mu50	0	0	0	0	0.48	0.4959	0_tan	0.061	0	0.03	0	0.06	0	0	0.14	0	0	0	0.11	0	0
TCTAGAGATTATAATATTTCAGAAGAAATATTTGATGATTTATGGATGAATCTTTATTACTTGTTTATGA	hypothetical protein	MW0278	MW2	0	0	0	0	0.25	0.5494	0_tan	0	0.81	0.85	0.7	0.98	1	0.28	1	1	0.6	1	1	0	0
TCTAGGATTAATAGGGACGATTCTAAGTACATTTGTTATAGCCTTGTTAAAAACTATTTTTGGCATTTAA	conserved hypothetical protein	SA0387	COL	1	0	0	0	0.32	0.0305	0_tan	0.0002	0.9	0.77	0.94	0.73	0.95	0.85	0.64	0.75	0.86	0.71	0.67	0	0
TCTAGGTATTATTTTAATCATCAGTGGGTATTACTACTCTTTACGCATTGTACATTACTATGATGCAATT	putative ABC transporter permease	SAR0672	MRSA252	0	0	0	0	0.23	1	0_tan	0.4393	0.65	0.65	0.62	0.68	1	0.25	0.56	0.2	0.33	0.14	1	0	0
TCTAGGTATTGGAGGCGAGCGTTTAACTGAGAATGAATTGGCTTATATTATTAGAAAGCCTTTTATTTCA	conserved hypothetical protein	SA1579	COL	0	0	0	0	0.27	1	0_tan	0.0051	0.74	0.75	0.66	0.85	1	0.24	0.8	0.6	1	0.5	0.7	0	0
TCTATACCTCACAGATACTAAAAATACAATTATCGATGAACGTCATCTATTACAAAAAGGAGGAGAATAA	hypothetical protein	SAS0031	MSSA476	0	0	0	0	0.43	0.0254	0_tan	0.1897	0.8	0.62	0.75	0.64	0.9	0.76	0.72	0.29	0.4	0.38	0.5	0	0
TCTATCTCAAGCATAACACTAAAGAACCGAACACGATCAAATCTGTACATTTCACAAGTTTAAAGACAGG	putative exported protein	SAR2566	MRSA252	0	0	0	0	0.06	0.4732	0_tan	0.4911	0.99	1	0.99	1	1	0.98	1	1	1	1	1	0	0
TCTATTTATTTTTTGTTACAAGTTCCATCAGTAATTAAACAGCATTATTTGTCTGTTTCCATTCCGTGGA	putative NADH-Ubiquinone/plastoquinone (complex I) oxidoreductase protein	SAR0630	MRSA252	0	0	0	0	0.15	0.6133	0_tan	0.7329	0.8	0.77	0.77	0.8	1	0.6	0.76	0.5	0.54	0.5	1	0	0
TCTCGATTTTTGTTTTCCTTCTAACAGGAATCATGATTTTTTCGCAAGTGCTATTTATTATTTTCGCTAT	hypothetical protein	SAV0401	Mu50	0	0	0	0	0.26	0.7676	0_tan	0.0307	0.08	0.06	0.1	0.01	0.02	0.04	0.05	0.08	0.54	0	0	0	0
TCTCTTTTTTATGGCTCGAATGAATGTTTGATTACCAATTACAGTAAGACGTTGTTTGTAGTGATTTTCC	hypothetical protein	SAR1930a	MRSA252	0	0	0	0	0.19	0.2128	0_tan	0	0.82	0.9	0.75	0.99	1	0.65	1	0.91	0.64	1	0.87	0	0
TCTGAAGAAGCATTGGCTACAAAATCCATAAATGCAAACGATTTATTAACTTTAGCATATGTGAAAGTTT	hypothetical protein	SAR2113	MRSA252	0	0	0	0	0.44	1	0_tan	0.0464	0.74	0.73	0.67	0.83	1	0.27	0.86	0.5	0.14	0.4	0.43	0	0
TCTGATTTATCACGTGAAACAGGTGTTGGAATTTCTTATTTAAGCCAAATTATTAATGGTAAAAAGATTC	ORFID:SA1833~hypothetical protein, similar to transcription regulator [Path	SA1833	N315	1	0	0	0	0.31	0.8653	0_tan	0	0.71	0.69	0.56	0.9	0.99	0.18	0.86	0.33	0.4	0.5	0.92	0	0
TCTGGTGTTTCGTTAAGGATAAACGTTACTAAATCAGGTTTTACTAAATTTATTAATGAATTAGTCTCGT	hypothetical protein	SAR1981	MRSA252	0	0	0	0	0.36	0.5664	0_tan	0.0168	0.75	0.79	0.7	0.88	1	0.38	0.75	0.63	0.57	0.5	1	0	0
TCTGTTAAACATAGTCTTTATGCGCTTGAAGAATATATCGACATTTTCCCTACTTTATCTCTAAAAGAAA	conserved hypothetical protein	SA0073	COL	0	0	0	0	0.29	0.077	0_tan	0.0001	0.19	0.32	0.16	0.43	0.12	0.02	0.1	0.92	0.95	0	0.31	0	0
TCTGTTAAATATAGGTATGTTACTCATAAATTCTGGGATGTTAGGCTTTTTTATAGCACATGGAATCTAT	conserved hypothetical protein	SA0196	N315	0	0	0	0	0.24	0.8439	0_tan	0.8442	0.84	0.82	0.82	0.84	0.66	1	0.96	0.93	0.38	0.67	0.64	0	0
TCTTAAGTGTATTTTTGTTTACCTTAGTTACACACTTATCCTATATGTTAATACGCTATAATGCACATGG	accessory gene regulator B	SA1842	N315	0	0	0	0	0.23	0.6299	0_tan	0.5198	0.72	0.68	0.68	0.73	0.44	0.98	0.76	0.29	0.09	1	0.5	0	0
TCTTAATTGCTTTACCATTTATGATCGGTTATGGCATTGGTATTACTATCTACTATCAACGCAAAGTTGC	MerR family regulatory protein	SAR2585	MRSA252	0	0	0	0	0.25	1	0_tan	0.1137	0.87	0.88	0.83	0.92	1	0.67	1	0.75	1	0.56	0.91	0	0
TCTTGTTGAAAAAACCAATTTTTTAGGAGTCAACGGGTCAGCAACGTATCAAATCACATTGAATCAAGTC	conserved hypothetical protein	SA0160	COL	0	0	0	0	0.17	1	0_tan	1	0.95	0.94	0.95	0.94	0.93	1	0.96	0.93	0.95	0.67	0.82	0	0
TCTTTAAATAGTCAGGTAGTATCATGCCATTCTGAATTGGTCGATATTAATATCAGTGGTGTTAAAGAAC	homoserine kinase	SA1364	COL	0	0	0	0	0.47	1	0_tan	0.0037	0.2	0.21	0.31	0.1	0.02	0.82	0.18	1	1	0	0	0	0
TCTTTACACCTTATATGATGGAAACACTCTCTTCCCTAGGCATGAAAGACAGCATTGTCGATTTAATTCA	hypothetical protein	MW1740	MW2	0	0	0	0	0.17	0.6565	0_tan	0.0234	0.97	0.98	0.95	1	0.98	0.92	1	1	1	1	1	0	0
TGAAAAAAGAACCCCGTGCAAATACACAAGCAGCGGAACGTATTTTACAAGATTTAAGAAGCCAACAATA	hydroxymethylglutaryl-CoA reductase	MW2466	MW2	0	0	0	0	0.08	1	0_tan	0.2267	0.99	0.99	0.98	1	1	0.96	1	1	1	1	1	0	0
TGAAAAATTTATTAGTTACTGGCTACACAACTGGAATTTTGAAAATCATAGGGCAAATGTTACTTGCTGT	putative membrane protein	SAS0372	MSSA476	0	0	0	0	0.27	0.0002	3_red	0	0.28	0.56	0.09	0.9	0.24	0.13	0.86	1	0.42	0.67	0.75	1	0
TGAAAACGCAGACGATAATTTTAACCAACTTTACGAAAATGCAAAGCCACTTAAAGAGAATATAGAAATA	plasmid recombination enzyme	SAA0003	COL	0	0	0	0	0.44	0.0057	2_orange	0	0.21	0.44	0.1	0.8	0.14	0.1	0.71	0.63	0.5	0.67	0.77	1	0
TGAAAAGTACGATTCCTGTTGCTCAAAAATCAAATCAATCTATCGTTCAAGATGTATTAACTAGACATCA	conserved hypothetical protein	MW0324	MW2	0	0	0	0	0.15	1	0_tan	1	0.98	0.98	0.98	0.98	0.99	1	1	1	0.85	0.8	1	0	0
TGAAAAGTGATGAGAAAATATTACTTGACCAAATGGTAAGTCATTTCAAAAACTTTGAAGATGATTTTAA	hypothetical protein	SA2270	N315	0	0	0	0	0.25	0.4109	0_tan	0	0.82	0.87	0.71	0.99	0.27	0.98	0.96	0.5	0.95	1	1	0	0
TGAAAATACTGAAATCCTAACGTTGGCATCGGAAGCTAAAGCGAATGAAAGAGTTGCAATCGTTGGCTAT	serine protease	SAR1905	MRSA252	1	1	0	0	0.29	0.1593	0_tan	0.0012	0.7	0.8	0.65	0.88	1	0.37	0.95	0.38	0.57	0.67	0.78	0	0
TGAAAATAGTATGACACAAACGGAAAATACGAGTAATGAGAGCAAAAGTAATGATCCAAGTAGCGTTAAT	clumping factor	SAR0842	MRSA252	0	0	1	0	0.27	1	0_tan	0.2311	0.94	0.93	0.92	0.96	1	0.85	0.94	0.89	0.8	0.89	1	0	0
TGAAAATGGTGACATTTCCTATAATTCTGAAGCTCCTATTTATTCAGCGAAATATAAACTGAAAAATGAT	hypothetical protein	SA0399	N315	1	0	0	0	0.13	0.2235	0_tan	0	0.83	0.9	0.74	0.99	0.68	1	0.97	0.79	0.8	0.78	1	0	0
TGAAACAAAAGCAGGGTTACAAAACTATAAAAATAGATCTATAAATAATATGGCGTTGTTGAAAAAGGTA	pathogenicity island protein	SA0904	COL	1	0	0	0	0.19	0.0893	0_tan	0	0.86	0.94	0.81	0.99	1	0.64	1	0.92	1	0.75	1	0	0
TGAAACATTTTATCAAAGAAGCGAGAAAGTGATTCGATATCAATATAATACTGATACTGTATCTGCAACT	conserved hypothetical protein	SA0381	COL	1	0	0	0	0.33	0.874	0_tan	0.7423	0.57	0.56	0.55	0.59	0.57	0.57	0.36	0.5	0.75	0.71	0.6	0	0
TGAAAGAACAACACTTTCAGGATGTCAACAATGTCGTGAATGCACTAAGAGATAAAGGATTTATCGAATC	putative membrane protein	SAS0034	MSSA476	0	0	0	0	0.3	1	0_tan	1	0.01	0	0.01	0	0.02	0	0	0	0	0	0	0	0
TGAAAGAATATATAGAGGATTATAAAAAATCTGATGACATATTAATTAATTTGTATATAGAAACGTATGA	terminase small subunit	MW1402	MW2	1	0	0	0	0.5	0.0652	0_tan	0.0176	0.07	0.19	0.08	0.26	0.08	0	0.3	0.63	0.25	0.2	0.2	0	0
TGAAATCATTACTTGATCAATCTTATGTAAATGATTTAGCTGCAGGAAGCTTAAACCCATACTACAAACG	putative exported protein	SAR1131	MRSA252	1	0	0	0	0.26	0.6618	0_tan	0.0001	0.86	0.88	0.77	0.97	1	0.59	0.92	0.88	0.69	1	0.9	0	0
TGAAATGCTGATGGTTGTATTAACAATCATTGGTTTAGTATTGATTAGTACTCAAGACCATAAAAAATAA	hypothetical protein	MW2072	MW2	0	0	0	0	0.03	1	0_tan	0.4871	1	0.99	1	0.99	1	1	1	1	1	1	0.93	0	0
TGAAATTGAAACGTTTATTTGCTGTTGTGATTGCAATGCTTTTAGTATTAGCTGGTTGCTCTAATTCTAA	molybdenum ABC transporter, molybdenum-binding protein ModA	SA2272	COL	0	0	0	0	0.26	0.1339	0_tan	0	0.86	0.93	0.78	1	0.53	1	1	1	1	1	0.92	0	0
TGAACTATCTTTAACAACCGAATACTATTATCCACTTCAAAACGCAATAATTGAATTTTACACTGAATAT	transcriptional regulator	SAVP031	Mu50	0	0	0	0	0.41	0.6092	0_tan	0.5702	0.01	0.03	0.03	0	0	0.04	0	0	0.08	0	0	0	0
TGAAGAAAATTATGGAATAAAAATCATATATACATCAAATATTAAAAATACTCGCTTTGATAGTGATATT	sensory box histidine kinase, putative	SA2390	COL	0	0	0	0	0.28	0.4044	0_tan	0.0343	0.81	0.87	0.78	0.91	0.13	0.98	0.97	1	1	1	0.33	0	0
TGAAGATATTGAAATACTAAAATCCAAAGCATTAAAGATTAATAATGTGTTGAAACAATTAATGGATGCT	phosphoribosylaminoimidazole-succinocarboxamide synthase	SA1075	COL	0	0	0	0	0.26	0.62	0_tan	0.0799	0.88	0.91	0.86	0.94	0.59	1	1	1	1	1	0.55	0	0
TGAAGATGTAAGCGAGAGAGTGAACGGAAATCCGATGAAACCGAAGACGAAAATATTATACTCTTGTTTC	hypothetical protein	MW1901	MW2	1	0	0	0	0.27	0.1719	0_tan	0	0.41	0.52	0.22	0.78	0.27	0.23	0.95	0.88	0.63	0.5	0.5	0	0
TGAAGCAATCAGCTCAGCTTTAATCAATGTTGCATGGTTTTGGCACACAAGTTACTCGCACAGAACTGAA	hypothetical protein	SAR0374	MRSA252	0	0	0	0	0.2	0.1111	0_tan	0.0187	0.85	0.93	0.84	0.95	1	0.69	0.95	0.88	1	0.71	0.93	0	0
TGAAGCCATTTCTTTTATTCGGCAATACCATTATTCAAAGATACTCCCTAGATTGTGTAAATACTTTCTA	hypothetical protein	SAV0410	Mu50	0	0	0	0	0.4	0.7902	0_tan	0.2001	0.11	0.1	0.08	0.17	0	0.04	0.25	0.38	0.54	0	0.1	0	0
TGAAGTCAGAAAACAGCCGTATGTAAAACTTTTAGAAATACTTAATGAAGAGAATAAAGAAGAGACTGAA	hypothetical protein	SA0378	COL	1	0	0	0	0.26	0.042	0_tan	0.838	0.9	0.78	0.84	0.83	1	0.7	0.72	0.8	0.85	0.67	0.77	0	0
TGAATAATTTAACAGTAGATCAATTAAAAGAACTTTTACAAATACAAAAGGAGTTCGACGATAGAATACC	hypothetical protein	MW1415	MW2	1	0	0	0	0.12	0.5397	0_tan	1	0.96	0.94	0.94	0.95	0.99	0.89	0.97	0.92	0.94	0.89	1	0	0
TGAATGAACATAAATTACAGTTCATTATACAGGATAATGGAGAAGGTATTGACAGCGGCTGTGAAATAAA	sensor kinase protein	SAR1331	MRSA252	0	0	0	0	0.33	0.8651	0_tan	0.0026	0.7	0.68	0.6	0.84	1	0.19	0.75	0.25	0.25	0	1	0	0
TGAATGATATTGATTTGATTCATTACATGTTACTGATGAACATACCTGCATATGTGTTTCTAGCTTGTTT	hypothetical protein	SA1757	COL	0	0	0	0	0.12	0.2325	0_tan	0.1931	1	0.98	0.98	1	0.98	0.98	1	1	1	1	1	0	0
TGAATTATGTGAATGCTCAACCCGATCCTAAATTAGACGAACTAAATAAAGTAAGTGATTATAAAAATAA	extracellular enterotoxin type G precursor	SA1642	N315	1	1	0	0	0.45	0.1089	0_tan	0.2853	0.18	0.08	0.16	0.09	0.02	0.8	0.11	0	0	0	1	0	0
TGAATTTGCGTTTTTACATCCACATAAAATAACAACAAACGACTTGAATGCTAAACTTAGACTAGCGTTA	MHC class II analog	SAR2030	MRSA252	0	0	0	0	0.26	0.8618	0_tan	0.2881	0.77	0.76	0.73	0.8	1	0.38	0.75	0.5	0.5	0.43	1	0	0
TGACAATGATATTACAGAATTAGAAGAGCGTATCAATCAGTTCGTGAGTTTATCTCAAGAAAAGGGACGA	conserved hypothetical protein	SA0338	COL	1	0	0	0	0.31	0.0085	1_yellow	0	0.58	0.38	0.61	0.28	0.7	0.57	0.27	0	0.17	0.43	0.08	1	1
TGACAATTTTAACTGCACTAGGTTCATTTTTTGAAGGGCTAATAAATATTAGTAAAGCAGGCATAAATTT	nucleoside permease NupC, putative	SA0310	COL	0	0	0	0	0.37	0.1046	0_tan	0	0.22	0.35	0.17	0.54	0.12	0.13	0.5	0.4	0.95	0	0.57	0	0
TGACAGATAGCGCACGTAAAGAACGCTTAAACCAATTTTTCGGCTCTAAAAGATATCTGTATCAAGATAA	hypothetical protein	MW1420	MW2	1	0	0	0	0.25	0.6358	0_tan	0.6268	0.88	0.91	0.91	0.88	1	0.79	0.95	0.85	0.88	0.57	0.89	0	0
TGACAGATAGTGGACGCAAAGAATACTTGAACCAATTTTTCGGATCTAAGAGTTATCTGTATCAGGATAA	hypothetical phage protein	SAS0913	MSSA476	1	0	0	0	0.51	1	0_tan	0.1681	0.65	0.67	0.6	0.74	0.71	0.79	0.75	0.43	0.25	0.2	0.6	0	0
TGACGAAATACAATTAACAAGACATATTAGTCAGGTTAAAGGTATTGGTTTTGATGTTGACTTTAAAGTG	hypothetical protein, similar to two-component sensor histidine kinase	MW0622	MW2	0	0	0	0	0.19	0.3597	0_tan	0.3505	0.92	0.96	0.92	0.96	0.79	1	1	1	1	1	0.81	0	0
TGACGACAAAGTGATGGATCCAGCGAAAAAACCAGCTCCAGGTAAAGTTGTATTGTTGCTAGCGCATAGA	5-nucleotidase family protein	SA0024	COL	0	0	1	0	0.3	1	0_tan	1	0.99	1	0.99	1	1	0.98	1	1	1	1	1	0	0
TGACGATGAAATTGAATAATGTTAAGCAAAAGCGTCATATTTTATGCACAAATGAATATAATAATAAGAA	hypothetical protein	SA1347	COL	0	0	0	0	0.33	0.0144	1_yellow	0	0.29	0.49	0.09	0.82	0.28	0.14	0.8	0.42	1	0.5	0.54	1	0
TGACTAAAGAAGCGGTAAACCCCTCTGAGAATATAAAAGTGATTCAAACGGATATTCTAAAATTTTCCTT	rRNA methylase	SA0048	N315	0	0	0	1	0.36	0.0016	3_red	0	0.87	0.65	0.91	0.43	0.96	0.94	0.5	0.25	0.33	0	0.27	1	0
TGACTTTTTTTATAGTACCTATGTTTCTACTATTCGTGTATCTGCCGAATTATAATTTTATAACTATATT	putative membrane protein	SAR0100	MRSA252	0	0	0	0	0.22	0.1968	0_tan	0.0001	0.83	0.9	0.77	0.97	1	0.63	0.91	0.75	0.6	1	1	0	0
TGAGCGCAAATACGAGGCACAAGTTAAGATAAGGAGAGATGGAGATGCCAAAGAAAACGGTAACGATTGA	hypothetical protein	MW1413	MW2	1	0	0	0	0.41	0.0829	0_tan	0	0.74	0.86	0.64	0.96	0.58	0.9	0.91	1	0.7	0.75	1	0	0
TGAGTTAATAAAGTATTATACACAGCCTCATTTATCACTATCAAATAAATGGTTATGGCAAAAGCCCAAT	hypothetical protein, similar to exotoxin 3	MW1049	MW2	1	1	0	0	0.25	0.016	1_yellow	0	0.35	0.53	0.15	0.84	0.2	0.1	0.96	0.85	0.31	1	1	1	0
TGATAAAAGAGATAAAGGGACTTGGATTATTTATTCTGAAATGGTTATCGAACCAAAAGGGAAAAATATG	Staphylococcus tandem lipoprotein	SA2497	COL	0	0	0	0	0.28	0.005	2_orange	0	0.48	0.69	0.22	0.94	0.27	0.24	0.86	0.57	0.95	1	1	1	0
TGATAATAAATCTCCATCTGACGCCATTTGTGATAATCCTTATGACTTAACTCCTAAAGGTACATTTGAT	putative membrane protein	SAR0061	MRSA252	0	0	0	1	0.2	0.0001	3_red	0	0.72	0.43	0.97	0.01	0.74	0.83	0.05	0.38	0.67	0	0	1	0
TGATAGATGAATTTGAAATTAAATTGAATTGGCTTATCATTCGTAAACATTATTATGACGTAACAATTCT	hypothetical protein	SAR1006	MRSA252	0	0	0	0	0.38	0.3392	0_tan	0	0.72	0.8	0.63	0.94	1	0.16	0.93	0.88	0.33	0.5	1	0	0
TGATATTTTTTTAGGTAATGAATACGAAAATTTCGTATTTACGAACGATAAAAAGAAATCAATTATTTTA	hypothetical transcriptional regulator	SA1804	N315	1	0	0	0	0.22	0.1116	0_tan	0.0002	0.84	0.92	0.79	0.97	0.97	0.7	0.93	0.91	0.79	0.71	1	0	0
TGATCGTCTCTTATCGACTAATGATGAGATCGCTTTACAATTCAATACTAAAAAGCATCAAATATTGCAA	hypothetical protein	SAR0793	MRSA252	0	0	0	0	0.21	0.8646	0_tan	0.0582	0.75	0.77	0.71	0.83	1	0.49	0.75	0.6	0.5	0.6	1	0	0
TGATCTTCAGTCAAAAAAAGCCATAAGAGAAGAAACGACAGTGAATACAATTTTAAATGTAGTTATGAGT	transposase A for Tn554	SA1484	N315	0	0	0	0	0.36	0.0478	0_tan	0.0001	0.95	0.85	0.97	0.74	0.98	0.96	0.86	0.4	0.63	0.2	1	0	0
TGATGATGGAGTGATAATAAATGCATTAGGAATTTTTGGTATGTATAAAATTATAGATTCCTTTTCAGAA	hypothetical protein	MW1915	MW2	1	0	0	0	0.24	0.0008	3_red	0	0.27	0.52	0.1	0.79	0.3	0.18	0.7	0.92	0.31	0.67	0.75	1	0
TGATGGTGACTACAAGCAAAATATCGATGCTTTCAAGACAATTGCGAAAGCTTTAGATAAAGAAAAAGAA	putative transport system binding lipoprotein	SAR2268	MRSA252	0	0	0	0	0.23	0.8619	0_tan	0.003	0.76	0.77	0.68	0.87	1	0.4	0.83	0.56	0.54	0.56	1	0	0
TGATGTCGTGAATTTAAAGGGTGGATATAAAGATTATGAAGCAAAGAACTTCAATAGTGCTCCTTTAATA	conserved hypothetical protein	SA0044	N315	0	0	0	1	0.38	0.0001	3_red	0	0.82	0.51	0.91	0.03	0.85	0.87	0.2	0.29	0.3	0	0	1	0
TGATGTCGTGGAAATATTATGGAGTTATACCAGAAGTTGATTTGTATTGTAATGTCGTGGAAATTTTATG	hypothetical protein	SA0500	COL	0	0	0	0	0.13	0.7376	0_tan	0.0006	0.95	0.96	0.9	1	1	0.76	1	1	1	1	1	0	0
TGATTCAAAAAGCAGCAGATATCGTTGATGAAACATATGAATACATACTAACGGTTGCAAAAGCTGGTAT	putative peptidase	SAR1607	MRSA252	0	0	0	0	0.33	0.8666	0_tan	0.7276	0.67	0.68	0.66	0.7	1	0.36	0.71	0.38	0.5	0.44	0.38	0	0
TGATTCTATATGCCTACACACAATCTGTATTCTCAGGTCGTAAAATAGAAAAAATGCTTAATGATAGCAT	IS1272, transposase POINT MUTATION	SA0036	COL	0	0	0	1	0.29	0.7035	0_tan	0.001	0.21	0.18	0.27	0.06	0.15	0.19	0	0.54	0.5	0	0.14	0	0
TGATTGCGGATGATACCGAAGGTTTACCTATAACCCAAGGTAATAATATATCGCTTTGTATTACTTTTGA	conserved hypothetical protein	SAS0046	MSSA476	0	0	0	0	0.44	0.0023	2_orange	0	0.06	0.27	0.03	0.5	0.15	0.05	0.55	0.14	0.25	0.29	0.3	1	0
TGCAAAAGCTGAGCAAACGACAGATAACGCATTGTGGAAAAATGTAAGAGACGCTTTAAAAGACGCGAAT	ORFID:SA1818~hypothetical protein, similar to beta-lactamase [Pathogenicity	SA1818	N315	1	0	0	0	0.3	0.7515	0_tan	0	0.6	0.63	0.43	0.85	0.3	0.84	0.72	0.6	0.44	0.4	0.92	0	0
TGCAAAGTTTAGTACCGGAAATACAAAGTAGTTATGGCATAACCATAAATAAAAATTTCAATATAGATAG	hypothetical protein	MW0370	MW2	1	0	0	0	0.29	0.0002	3_red	0	0.28	0.56	0.11	0.86	0.25	0.05	0.96	1	0.22	0.33	0.71	1	0
TGCAACAGATTCCTATTCATAATGATGCCAAGCAGACAATGAGTGCAATTCAATTTTTAGATGCCTTTCA	conserved hypothetical protein	SAR2477	MRSA252	0	0	0	0	0.33	0.4247	0_tan	0.0003	0.84	0.78	0.9	0.67	1	0.83	0.29	0.4	0.78	0.4	1	0	0
TGCAACCAATCAAAGCCAAGCACAAAACAATCAATTTAGTAATCATTCAGACCTGTCTAATAACGCACCT	putative lipoprotein	SAS0895	MSSA476	1	0	0	0	0.54	0.0812	0_tan	0	0.33	0.5	0.1	0.85	0.47	0.13	0.82	0.5	0.17	0.33	0.83	0	0
TGCAAGCATTATCAACACGTGTATTTGATTTCCAAATAGAACATCGCAATATTTCAATTGAAGCGTATAG	TetR family regulatory protein	SAR2658	MRSA252	0	0	0	0	0.16	0.4319	0_tan	0.029	0.96	0.98	0.94	1	1	0.91	1	0.93	0.93	1	1	0	0
TGCAGTACTAATGACTATTAAATATGTTATGAGAGAATCCAAAGTTAATAAAGACGACATTAAGTTTGTG	gluconokinase	SA2515	COL	0	0	0	0	0.38	0.0312	0_tan	0	0.34	0.53	0.24	0.75	0.21	0.16	0.6	0.92	1	1	0.5	0	0
TGCCATCTATGGACTGAACTTTTTAATTCAAAATGATTTAGCGCGCTTAAAAGCACATTATAAAATCGAA	putative GTPase protein	SAR1219	MRSA252	0	0	0	0	0.11	1	0_tan	0.5984	0.98	0.99	0.99	0.98	1	0.98	1	0.92	1	0.89	1	0	0
TGCCATTGCTTTTTGTATCTATTTACGTTTTTGGTGTAGTCGGTTTTGGATTTGATGTTTTCAATTATTG	hypothetical protein	SA0268	COL	0	0	0	0	0.39	0.0466	0_tan	0	0.41	0.59	0.24	0.9	0.27	0.18	0.81	0.5	0.95	0.33	1	0	0
TGCCGTTTATTATTACACAAGGGCAAGCTTTTGAATACCGTAATGATCTATTGTTTATTGCATCTTTCAT	sodium/hydrogen exchanger family protein	SAR2529	MRSA252	0	0	0	0	0.36	0.8047	0_tan	1	0.89	0.87	0.89	0.88	1	0.78	0.8	0.8	0.82	0.8	0.67	0	0
TGCCTATTTAAAAAAATCGGATATGAATATGAAAGGGGCTACGCCTTTTAAGAGTAAATGGATAAAAAAA	hypothetical protein	SAS0037	MSSA476	0	0	0	0	0.47	0.3588	0_tan	0	0.31	0.39	0.01	0.79	0.2	0.15	0.76	0.5	0.44	0.57	0.55	0	0
TGCGAAAGTTATTGAAGAAGTTACAGGTAAATCTTATGCTGAGAATTATTATACAAAAATAGGAGATCCT	Fmt, autolysis and methicillin resistant-related protein	SA0909	N315	0	0	0	0	0.08	0.8035	0_tan	0.0097	0.92	0.93	0.87	0.97	0.75	1	0.97	1	1	1	0.88	0	0
TGCTAAATATTTTACGCATATTAATATCATTAATGATAGCCATATTGAAAAATTATTGAAAAAACTTTAT	hypothetical protein	SA1342	COL	0	0	0	0	0.42	0.0564	0_tan	0	0.48	0.65	0.27	0.94	0.79	0.07	0.83	0.56	0.95	0.5	0.82	0	0
TGCTATGATAGAAAGTGAAAAATTAAGCGAGTTACTAAAGCCAGCCAATCAGTTAAAATCACCAGATGAT	hypothetical protein	SA2486	COL	0	0	0	0	0.37	0.0411	0_tan	0	0.65	0.8	0.37	0.99	0.53	0.48	1	0.85	1	0.67	0.94	0	0
TGCTGAAAGCAAAACTCTACACATCATTCATCCAAAAGATAGAGTTGTCAGTTTAGATCATGTTTTGTAT	hypothetical phage protein	SAS0900	MSSA476	1	0	0	0	0.38	0.057	0_tan	0	0.26	0.42	0.17	0.72	0.2	0.21	0.64	0.63	0.75	0.57	0.4	0	0
TGCTGAACTTGAAGAAATGCACTCAACTATTATGAGAAGAAAAAATATGGAAAACAATCCATTATCTCTA	replication initiator protein	VRA0001	Michigan	0	0	0	0	0.37	0.1147	0_tan	0.0002	0.39	0.25	0.42	0.12	0.58	0.24	0.08	0.18	0.23	0	0	0	0
TGGAAAAAACATATCTAGTGCTAATGATACTTAACATGCAAAAATGGCACTATTTAAATTTTTCAATTTC	hypothetical protein	SA2336	COL	0	0	0	0	0.28	0.0004	3_red	0	0.47	0.74	0.19	1	0.34	0.25	0.96	0.69	1	1	0.93	1	0
TGGAATTAAAAGTAAAACAATAGGTAGACAAATAGATCAATTAAAAGAAGCGAAAAAATTCCCTTCTAAT	hypothetical protein	MW0402	MW2	0	0	0	0	0.38	0.056	0_tan	0	0.17	0.3	0.11	0.47	0.11	0.09	0.33	1	0.1	0	0.33	0	0
TGGAGAACAAGGGGCACCTGAAGAGATTTTTAACAATCCAAAAACTGAAGAACTAAAACGCTTTTTAAAT	ABC transporter ATP-binding protein	SAR2502	MRSA252	0	0	0	0	0.28	0.5237	0_tan	0.0039	0.84	0.87	0.79	0.95	1	0.56	1	0.67	0.64	0.86	1	0	0
TGGAGATGAACATGCCAAAGTATCATTGTCAAAAGATTTAGTAGATCGTGAAACTAATGTTGTTTTAATT	ClpA-related protein	SA2203	COL	0	0	0	0	0.47	0.4411	0_tan	0	0.27	0.35	0.15	0.68	0.17	0.1	0.67	0	1	0	0.38	0	0
TGGATATATAGATTGGCCTAGTTTCGTTGATTACGAAGATTTCCAAGTTGAAGAAGTAATGAGTTTATTA	hypothetical protein	SAR0084	MRSA252	0	0	0	1	0.34	1	0_tan	0.0304	0.78	0.78	0.72	0.87	1	0.52	0.83	0.75	0.56	0.5	0.67	0	0
TGGCGATATTAGAGACACGCATTACAAGTTATCTGACGGATCTATTATTAGTCTTATAGACTTTGTTGTT	hypothetical phage protein	SAR2073	MRSA252	1	0	0	0	0.34	0.5068	0_tan	0.2558	0.87	0.82	0.82	0.89	0.98	0.78	0.92	0.57	0.78	0.4	0.75	0	0
TGGCGCTATGATAGAAAGTGAAAGATTAAGTGAATTACTAAAACCAGCACAGAAATTAAAATCGCCTGAT	putative membrane protein	SAR2563	MRSA252	0	0	0	0	0.28	1	0_tan	0.4979	0.99	0.99	0.98	1	1	1	1	1	0.8	1	1	0	0
TGGTGAATCCTATCTTTACCAGAAAAGATAACCAAGTAATCGTGAATGTCGCTGTGAAATATTTAGATCA	hypothetical protein	SAV0399	Mu50	0	0	0	0	0.42	1	0_tan	0.1425	0.1	0.12	0.08	0.17	0	0.09	0.2	0	0.54	0.29	0	0	0
TGGTTCAGATGAAAAATCTAAGGAACTCAAAGAATTATTAACAGAAATTTCTGATATGTCACCTAGACTT	alkyl hydroperoxide reductase subunit F	MW0356	MW2	0	0	0	0	0.05	1	0_tan	0.2233	0.99	0.99	1	0.98	1	1	1	1	0.92	0.88	1	0	0
TGGTTGATAACGAACTTTATTAATAACAAATATAGAAAAAGTACCCATACTTTTATCTCCTTTCCATTTT	hypothetical protein	SAV0051	Mu50	0	0	0	1	0.33	0.5168	0_tan	0.3409	0.95	0.92	0.96	0.92	0.98	0.98	0.9	0.86	0.71	0.67	0.92	0	0
TGTAAAAAGTAATCATCCTGTCGCTCCAAGTTCAAATCAATCTATCGTTCAAGATGTATTAACTAGACAT	conserved hypothetical protein	SAR0345	MRSA252	0	0	0	0	0.19	0.5718	0_tan	0.024	0.92	0.94	0.89	0.97	0.99	0.79	1	1	0.8	0.8	1	0	0
TGTACAAATGATATTTGAACCATCACATTATGATGATATGTTTATTTCAAGAAAAGCTTTAACGCCAGTG	hypothetical protein	MW1443	MW2	1	0	0	0	0.41	0.5167	0_tan	0.7528	0.95	0.91	0.92	0.94	1	0.74	0.89	1	1	1	1	0	0
TGTACCGAGATATGAAGCAGAATACAAATTGAATAATAGTGATACAAATGTAAAAAAACTTAGAGATATT	hypothetical protein	SA0397	N315	1	0	0	0	0.42	0.0049	2_orange	0	0.83	0.62	0.93	0.44	0.91	1	0.33	0	0	0	0.14	1	1
TGTAGGTTTAAATCCAGAACGATTACGCGTAACAGGTGATATAACCTTTGATGGTAAGTCAATGTTGTCG	oligopeptide transporter putative ATPase domain	SAR2551	MRSA252	0	0	0	0	0.16	0.3676	0_tan	0.0034	0.78	0.84	0.73	0.9	1	0.54	1	0.56	0.47	0.8	1	0	0
TGTATCACCTGAAAATAACTTTCAATTTGTAGGTGATTTAATTAAAAGTGAAAGATTAAGTGAGTTACTA	putative exported protein	SAS2368	MSSA476	0	0	0	0	0.15	0.6176	0_tan	0.104	0.99	0.98	1	0.97	1	1	1	1	0.91	0.71	1	0	0
TGTATTTACTTAGGATATCAAGGTTTAATTTGGTTGCTCGATTTTTTTCAAATAAATAGTGGGTTTTTAC	hypothetical protein	SA1477	N315	0	0	0	0	0.15	1	0_tan	0.191	0.99	0.99	0.98	1	0.96	1	1	1	1	1	1	0	0
TGTATTTATACGAAAAGATGGTTATTGAAAACAAAGAGATACCAATTGATGATGGGAAGTCTTTAGGTAA	pathogenicity island protein	SA0889	COL	1	0	0	0	0.37	0.0062	2_orange	0	0.25	0.48	0.14	0.78	0.23	0.13	0.77	0.4	0.86	0.67	0.54	1	0
TGTCATTGAAGGAACTTGATTTTAAAATAAGAAAACTGTTGATTAAAAAATACAAACTGTATGAAGGGTC	exotoxin 12	SA0388	N315	1	1	0	0	0.15	0.3152	0_tan	0	0.83	0.88	0.73	0.98	0.39	1	0.97	1	1	1	0.93	0	0
TGTCTTTAACGAACTGATTATTAAGTTAGATGATATTAGTAAAGTAGAAACATACAGACGTAGTAAGAAG	hypothetical protein	MW0746	MW2	1	0	0	0	0.34	0.3473	0_tan	0.0101	0.05	0.1	0.04	0.16	0.02	0.02	0.13	0.58	0.08	0	0	0	0
TGTGAGAGATGTAGCAGAACTACACATTTTGGCAATGACCAATGAGCAAGCCAGCGGTAAACGATTTATT	putative reductase	SAR0325	MRSA252	0	0	0	0	0.35	0.6813	0_tan	1	0.97	0.95	0.96	0.96	1	0.98	0.92	1	0.78	1	0.6	0	0
TGTGGTTCAGGTTCATTACTGTTACGCGTTGGTAAAGAGGCAAAAGTGTATCGTTATTTTGGACAAGAAC	putative type I restriction enzyme modification protein	SAR0433	MRSA252	1	0	0	0	0.28	0.4595	0_tan	0.1275	0.88	0.92	0.86	0.94	1	0.75	0.92	0.67	0.7	1	1	0	0
TGTTAATTACCTATCAAATCATTTTATTTTTTATTATTAGTCTAAGTTACTATTTAACTTTAAATCATTA	hypothetical protein	SA0188	N315	0	0	0	0	0.23	0.4714	0_tan	0.6299	0.92	0.88	0.91	0.88	0.84	1	0.96	1	0.95	0.33	0.54	0	0
TGTTATAGATATCATCAGTGTATCCAAAGATACTCTTGATTATATAAAGTCAGAATTCAATGATCACTGT	hypothetical protein	SA2728	COL	0	0	0	0	0.18	1	0_tan	0	0.74	0.75	0.59	0.93	1	0.12	0.92	0.62	1	1	0.71	0	0
TGTTATCGACAGTGAATTGCGTACTATTAGAAACACTAATCATTTAGTTATGAGAAATAATTTGGTTCTG	trsO protein	VRA0021	Michigan	0	0	0	0	0.42	0.7336	0_tan	0.4685	0.48	0.44	0.44	0.51	0.69	0.26	0.44	0.44	0.18	0.5	0.27	0	0
TGTTATTCTTTATTGGTTTATACCACTTTTAACAACTTTTCAGATTATTCGTTATTGGGCAGAAATGGCT	putative fatty acid desaturase	SAR2592	MRSA252	0	0	0	0	0.31	0.6137	0_tan	0.0856	0.71	0.67	0.64	0.77	1	0.4	0.75	0.33	0.5	0.38	0.56	0	0
TGTTCAGCATCATATTTGTATCTATAGTAGCTCCTATTATAGTAGGGGTTATAATCACGTTGTTTTCACA	hypothetical protein	SAVP009	Mu50	0	0	0	0	0.38	1	0_tan	0.0068	0.06	0.07	0.03	0.16	0.08	0	0.25	0	0	0.14	0.3	0	0
TGTTCGATACATTTTATAAATCTCTTAAGGGAAAACAAATTCTTGTTTATTCTGGACTGTTTAAAGAGGC	replication protein	VRA0023	Michigan	0	0	0	0	0.33	0.0852	0_tan	0.0002	0.36	0.23	0.39	0.1	0.53	0.29	0.08	0	0.15	0	0	0	0
TGTTGCTAAAACATCTATGTCTAAAATCACTTTAACACCACAACAAATTATTAATATGATGACGCGTTTA	FdhD/NarQ family protein	SAR2364	MRSA252	0	0	0	0	0.36	0.1701	0_tan	0.0242	0.13	0.06	0.15	0.04	0.93	0	0	0	0	0	0	0	0
TGTTGCTTTATCCATTTTCCTACATTTTATAACCGCCATTTACAAACGTCGAAGGTGTGAAATCATACTC	hypothetical protein	MW1746	MW2	1	0	0	0	0.37	0.0091	1_yellow	0	0.37	0.59	0.24	0.91	0.32	0.13	0.78	0.93	1	0.4	0.92	1	0
TGTTTACAGCTTTAGGGATTGGTATAGTATTCGGTGTGTTATTGCATCTTATTTATGGCACACATTCGAA	sodium:dicarboxylate symporter family protein	SA0454	COL	0	0	0	0	0.21	0.0079	1_yellow	0	0.33	0.53	0.24	0.73	0.19	0.17	0.8	0.33	1	0.2	1	1	0
TGTTTACGTTTCATAGTGGACTATCGTTAAACATCGAGGCACAAGGTGATATCGATGTAGATGATCACCA	putative imidazoleglycerol-phosphate dehydratase	SAR2758	MRSA252	0	0	0	0	0.31	0.3695	0_tan	0.0026	0.91	0.95	0.88	1	1	0.74	1	1	0.89	1	1	0	0
TGTTTGAAAATGTACAAAATTTAATCTTATATATTTCTTGGCTTTTCATGACTATGCTATTTATGTTAAT	conserved hypothetical protein	SA0554	N315	0	0	0	0	0.2	1	0_tan	0.09	0.86	0.87	0.82	0.91	0.42	1	1	1	1	1	0.67	0	0
TGTTTGTGCCCTACTAAACCACAGGGAACGTCAGTGGCTTATGCTTTATCTTGAAGGCTATAAGCAATAT	putative DNA-binding protein	SAR1859	MRSA252	0	0	0	0	0.24	0.1574	0_tan	0	0.8	0.88	0.71	0.99	1	0.47	1	0.78	0.6	0.71	1	0	0
TGTTTTTGAACAAAGTATTAAAAAACATAACGAAATGATGTATATTGAACTATGTATTGAAAAATTTTAA	NADH dehydrogenase subunit	SAV0272	Mu50	0	0	0	0	0.59	0.1402	0_tan	0	0.66	0.81	0.33	0.97	0.39	0.94	1	0.86	0.89	1	0.75	0	0
TTAAAACAACTAAAGAATGTAAAAGTAATAATATCTTTAAAAGAAGTCAAGAAATTAATAATAGAGAAAG	hypothetical protein	SAS058	N315	1	0	0	0	0.36	0.3382	0_tan	0.0015	0.91	0.95	0.86	0.99	0.96	0.83	0.96	1	0.82	1	1	0	0
TTAAAACAATCAGATTTGGTCGTAACGTTATGTAGTGATGCAGACAATAATTGTCCTATTTTACCACCAA	arsenate reductase	SAP018	N315	0	0	0	0	0.22	0.8716	0_tan	0	0.72	0.73	0.6	0.89	1	0.29	0.91	0.42	0.46	0.78	0.88	0	0
TTAAAACTCAACGGTAAAGTTGGTTGGAAAGACAGTGAAATATGGAAAGCTATACAACTACTAGATATAC	hypothetical protein	MW1935	MW2	1	0	0	0	0.32	0.0121	1_yellow	0	0.38	0.58	0.18	0.98	0.31	0.23	0.94	0.92	0.79	0.6	0.91	1	0
TTAAAACTGCTATAAAGCTAATTATTAATAATAGGGGCAAAGCAAAAAATGTCATACAACAAGTTGGTGG	hypothetical protein	MW0372	MW2	1	0	0	0	0.44	0.0142	1_yellow	0	0.32	0.54	0.15	0.83	0.2	0.16	0.84	1	0.2	0.5	0.67	1	0
TTAAAATGATTGTTGTCATCGCGTTTTTGGGTGCTATTGTTGTTACAGTCTTAGTCGTTGCACTAGGGAT	putative siderophore transport system permease	SAR0117	MRSA252	0	0	0	0	0.17	0.3887	0_tan	0.0003	0.86	0.9	0.8	0.97	1	0.62	1	0.82	0.85	1	1	0	0
TTAAACATATTAAAGAACCTTATGATAAACACACAGACATCCACTTGATGAAAGCAATTAGCGAAAGTGA	hypothetical protein	SA0054	N315	0	0	0	1	0.24	0.0745	0_tan	0.0001	0.95	0.86	0.97	0.79	0.97	0.98	0.84	0.73	0.77	0.67	0.75	0	0
TTAAACATTTAGTAGATGAATTTATTCTTGTTACTGAAGAAGAAATTGAACATGCTATGAAAGATTTAAT	threonine dehydratase, catabolic	SA1477	COL	0	0	0	0	0.16	0.1114	0_tan	0.0003	0.92	0.97	0.89	1	1	0.67	1	1	1	1	1	0	0
TTAAAGAATTTGGGTGTGGGTGTGTATATAGTGAAAGAATAAGTGGTGTCAAACGTACAGAGCTTGTTAA	site-specific recombinase family protein, degenerate	SA2141	COL	0	0	0	0	0.4	0.0165	1_yellow	0	0.59	0.78	0.33	1	0.5	0.35	1	0.89	1	1	1	1	0
TTAAAGACCTAAAAGAACGTATGCATGCACCTGATGGAATGAATGCACTTCGTGAACAAGTGATTTTCAT	hypothetical protein	SA1767	N315	1	0	0	0	0.15	1	0_tan	0.7238	0.96	0.96	0.95	0.97	0.99	1	0.96	0.8	0.87	0.5	1	0	0
TTAAAGATATTTTAACAGAACATCATATTAGAATATTAGACTTACCGCTTATGACTGGGCTGGTTGCTGA	ORFID:SA2120~hypothetical protein, similar to amino acid amidohydrolase	SA2120	N315	0	0	0	0	0.06	0.0505	0_tan	0.1216	0.96	1	0.96	1	0.93	1	1	1	1	1	1	0	0
TTAAAGTTGTTGAAAGATAGTTTTGAGGATTTAAAGGATAGTAATGGTTGGCATTTTGATGAGCTATATC	hypothetical protein	SA1830	N315	1	0	0	0	0.4	0.6907	0_tan	0	0.75	0.79	0.52	0.99	0.93	0.28	0.95	0.78	0.57	0.86	0.93	0	0
TTAAATCAAAATGGCAAGCTTTGAATAAAGGGATGATTAACTTGTTTGGAGGGGAAAACGATGTTAACTA	conserved hypothetical protein	SA2484	N315	0	0	0	0	0.22	0.3251	0_tan	0	0.8	0.86	0.73	0.95	0.54	1	0.93	0.56	1	0.5	0.93	0	0
TTAAATCAAATTAATAAGTTGGGCAAAGATTATGGAGAAGTTACTGATGAAGACATTTATAATATTATTC	sdrH protein, putative	SA2019	COL	0	0	0	0	0.05	0.2059	0_tan	0.1017	0.94	0.97	0.93	0.98	0.84	0.98	1	1	1	1	1	0	0
TTAACAACTCCTATAAGATTATATTTAATTGATAATAATTATCAATATCAATTATTAGTGTTAATTGTAG	hypothetical protein	MW1673	MW2	0	0	0	0	0.45	0.574	0_tan	0.0207	0.96	0.99	0.92	1	0.94	1	1	0.9	1	1	1	0	0
TTAACGAAGGTAAAGATATAAGATTTAGTAGCGAACGTGATGAATACGAACCACAAAATAATGAATTCTT	hypothetical protein	SAV0900	Mu50	1	0	0	0	0.31	0.8402	0_tan	0.0018	0.8	0.83	0.73	0.93	0.73	0.9	0.93	0.7	0.78	0.5	0.93	0	0
TTAACGATAGAAAAAGATTATGGCAGAGAACTTGTATTGAACAAAGGTTATATAGTTGGGATCAATGTTG	hypothetical protein	SAV0879	Mu50	1	0	0	0	0.43	0.4783	0_tan	0.153	0.43	0.35	0.43	0.28	0.33	0.66	0.17	0	0	0	0.29	0	0
TTAAGAAAAGATCTAAGGTTATGTAATTGGCCTAAATTTATTAATCGTTTAAATTCAGTTAGTAAAAAGT	transposase for IS1181	SA0369	N315	0	0	0	0	0.3	0.0446	0_tan	0	0.61	0.45	0.7	0.33	0.11	0.98	0.39	0	1	0	0	0	0
TTAAGAAATACAAATTATTGTGACACTGTGAAAAAGCAAACGCGATATGGTGAAGGTATTGGTAAGCAAT	conserved hypothetical protein	SA0897	COL	1	0	0	0	0.38	0.177	0_tan	0	0.18	0.28	0.13	0.47	0.05	0.08	0.75	0.17	0.67	0	0.57	0	0
TTAAGCATTACTAAAAAAGATGAGAAAGGCAAAATCTCACACGATGATTCAGAATATAAGATAACTAAAG	exotoxin	SAR0425	MRSA252	1	1	0	0	0.33	0.8315	0_tan	0.131	0.85	0.83	0.8	0.89	1	0.58	0.9	0.71	0.57	0.33	1	0	0
TTAAGGAAAATAAAACATTCTTATTTAAAGAAGTCATTTTTAGAAATTGTTGAGACTTTAAAAAATGATC	conserved hypothetical protein	SA2245	N315	0	0	0	0	0.19	0.4078	0_tan	0.0002	0.91	0.94	0.86	0.99	0.67	1	1	1	1	1	0.85	0	0
TTAAGGTTCATGGTAAAGATAGCCCCTTAAAGTATTGGCCAAAGTTCGATAAAAAACAATTAGCTATATC	toxic shock syndrome toxin-1	SA1819	N315	1	1	0	0	0.4	0.3472	0_tan	0.1844	0.78	0.7	0.69	0.8	0.98	0.39	0.86	0.5	0.67	0.38	0.38	0	0
TTAAGTATAAAACTTAAATCAGCAATGGCAAATGATCAAGGGATAACTAAACATGACATAGGACTTGCTG	map protein, authentic frameshift	SA2002	COL	0	0	1	0	0.15	0.5927	0_tan	0.0338	0.91	0.94	0.88	0.96	0.72	1	1	1	1	1	0.76	0	0
TTAAGTTTTAAATCTTCACTAGACAAGCCTGTAAAACTGCAATTACCACAATTAAACAACGTAGTGACCG	conserved hypothetical protein	SA0676	COL	0	0	0	0	0.05	0.2253	0_tan	0.2423	0.98	1	0.98	1	0.97	1	1	1	1	1	1	0	0
TTAATAATAAAGAAAAGATAGAAAATATCATTTTTAAGTTAGTGGAACAGGATGTTGCTATCATGTGGAT	ORFID:SA2243~hypothetical protein, similar to ABC transporter (ATP-binding	SA2243	N315	0	0	0	0	0.24	0.6727	0_tan	0.0933	0.84	0.87	0.81	0.9	0.53	0.98	0.96	1	0.7	1	0.64	0	0
TTAATCAAATTATTGGAAAAATACATATCGAAAATGTGTATATTGAAACCAGAAAGGGAAAAGTGCATTA	hypothetical protein	SA1345	COL	0	0	0	0	0.22	0.1269	0_tan	0	0.76	0.86	0.68	0.96	1	0.18	0.88	1	1	1	0.67	0	0
TTAATCCCGAAAGCATGGTAGAGGTATTTAAAGGAATGGATACCGTTGTGTTTATTCCAAGTATTATCCA	conserved hypothetical protein	MW0381	MW2	1	0	0	0	0.17	0.6275	0_tan	0.1215	0.99	0.97	0.96	1	0.89	1	1	1	1	1	1	0	0
TTAATGCGTTATTATCTTTAATGTCAACCGAAGGTATTATCGTATTAGTTATCTATCATGGTCATAGTGA	conserved hypothetical protein	SAR1846	MRSA252	0	0	0	0	0.33	0.8597	0_tan	0.4719	0.74	0.72	0.7	0.76	1	0.47	0.7	0.5	0.55	0.5	0.5	0	0
TTAATGTTGTTTACTCAGGGAAACATGAAGTAGTTACAAACGAAAATAGTTTATTTGTTATTGATGAAGA	hypothetical protein	SAR1134	MRSA252	1	0	0	0	0.31	0.1096	0_tan	0	0.7	0.81	0.57	0.97	1	0.19	0.94	0.57	0.45	0.8	1	0	0
TTAATTAATAAGAAAGAAACATTTTTAACTGATATGATAGAGGGCATGTTAATTGCGCATCCAGAGTTAG	putative dihydroxyacetone kinase	SAR0660	MRSA252	0	0	0	0	0.34	1	0_tan	0.0444	0.95	0.96	0.93	1	1	0.87	1	0.89	0.9	1	1	0	0
TTAATTATGATTATTTTAACAGTTATTTCTTTAGGTGTAATCTCAGTATATGCTCCTGCAGCAACTAAAA	accessory gene regulator protein B	SA2023	COL	0	0	0	0	0.32	0.0028	2_orange	0	0.36	0.6	0.16	0.95	0.25	0.12	1	0.58	1	0.5	1	1	0
TTAATTATTCTTTGTATGATACCTTAAATACCTTATTACATATCCCATATGAAAACGGCTTTTTTATTAT	hypothetical protein	SAS038	N315	0	0	0	0	0.21	0.621	0_tan	0.6231	0.99	0.97	0.97	0.99	1	1	1	1	0.63	0.83	1	0	0
TTACAACTTTATTCAATTTACCTTGGTAGAATTGACGAAGGTATGTCTAAACATTCTGCATCTTATTTCG	hypothetical protein	SA1802	N315	1	0	0	0	0.28	0.8297	0_tan	0.0503	0.86	0.85	0.81	0.92	0.98	0.79	0.83	0.67	0.64	0	1	0	0
TTACAAGCCAATCCACAATATACAATTCACTATTTATCGCAAGAAATCACAAGACTAACACAAGAAAATG	hypothetical protein	SAS061	N315	1	0	0	0	0.4	0.7363	0_tan	0	0.54	0.58	0.41	0.79	0.31	0.52	0.71	1	0.83	0.2	0.92	0	0
TTACAAGGTCGTGTCGAAGACAGAAAAGATTTATACATACACATGCTATAATGAAATCATACCTAAAAGA	GTP pyrophosphokinase	SAV1001	Mu50	0	0	0	0	0.31	0.0008	3_red	0	0.15	0.39	0	0.76	0.25	0.02	0.73	0.33	0.18	0.43	0.77	1	0
TTACAATACAGATCTACCAGCAATACCTCATACCAAATTGAGAGATGCCCTTGCTCACGAAATAAATAAA	hypothetical protein	SAR0086	MRSA252	0	0	0	1	0.41	0.7205	0_tan	0.1027	0.69	0.66	0.62	0.75	1	0.18	0.73	0.29	0.33	0.33	0.5	0	0
TTACAATCCATTTGGGATGAAAACAAGCGTTTCTTAAATCCACAAGAGTACCCAGTCGATTTAAGTAAAG	conserved hypothetical protein	SAR2006	MRSA252	0	0	0	0	0.26	0.6801	0_tan	0.0933	0.84	0.86	0.8	0.9	1	0.59	0.94	0.78	0.64	0.67	1	0	0
TTACAGAAGGCAAGTACAGTGTTCTTGACTTTGGTAGTGGTACTACAATTATTGATACTTATCAAAATAT	conserved hypothetical protein	VRA0060	Michigan	0	0	0	0	0.41	0.2765	0_tan	0.0483	0.36	0.27	0.37	0.2	0.58	0.16	0	0.27	0.18	0	0	0	0
TTACATGCGTTCCCAAGTTACACAACAACCATTTGATACATCACGTTTAGAGCGATTAGGTTTAACTGAA	nitrate reductase beta chain	SAR2485	MRSA252	0	0	0	0	0.32	1	0_tan	0.4507	0.76	0.75	0.73	0.79	1	0.57	0.67	0.57	0.5	0.67	0.43	0	0
TTACATTTACTTAAATAAAAAGCTTAAACTAAAGATATATGATGATAATCTAGATAATGAAAATAAGGTT	hypothetical protein	MW0552	MW2	0	0	0	0	0.45	0.4318	0_tan	1	0	0.02	0.01	0	0	0	0	0.5	0	0	0	0	0
TTACATTTAGGAGATTCAGAATTCGCGTATGATGATACGGAACTTAGCTTATTTAATAGAGTAAAAGGCA	conserved hypothetical protein	SA0999	N315	0	0	0	0	0.06	0.1121	0_tan	0.2468	0.97	1	0.97	1	0.95	1	1	1	1	1	1	0	0
TTACCTCTTATCAACTAATGATGATATTGCTTTGCAATTCAATACAAAAAAGCACCAAATATTGCAACAT	conserved hypothetical protein	SA0694	N315	0	0	0	0	0.06	1	0_tan	0.2745	0.93	0.94	0.92	0.96	0.83	0.98	1	1	1	1	0.85	0	0
TTACGGATTATATAAAGGTACATCTAAATACGGTAAAATCATTATCAATTTGAAAGACGAAAATAAAGTA	exotoxin 1	SAR0428	MRSA252	1	1	0	0	0.38	0.6197	0_tan	0.1675	0.59	0.54	0.53	0.65	1	0.03	0.43	0	0	0	0.73	0	0
TTACTAAAACAGTTATATCAAAAATAGTATCAAGTAGTCTTTCTGAAGAAGAAGTTGCTTCTGGAATGAG	tetracycline resistance protein	SAA0002	COL	0	0	0	0	0.28	0.7733	0_tan	1	0.08	0.06	0.07	0.07	0.02	0.05	0.14	0.22	0.15	0	0.17	0	0
TTACTAAATTAAGAAATTGGATGTCAAACATCTGGAACTCTATTAAAGATAACACGGTGGGTATAGCTGG	hypothetical protein	MW1895	MW2	1	0	0	0	0.13	0.2795	0_tan	0.0463	0.98	0.95	0.99	0.94	1	0.98	0.96	0.93	1	0.86	0.8	0	0
TTACTACAAAATTAATATCGCCACTTGGTAAATTAAGAGCAGGATTAGATTTAATCAAAAAGCCTATACA	protoporphyrinogen oxidase	SA1650	N315	0	0	0	0	0.19	0.2996	0_tan	0.0001	0.81	0.74	0.88	0.64	0.67	0.98	0.47	0.86	1	0.17	0.5	0	0
TTACTACTGTTCTTATTCTTAACCAATTAGCGAATTCTGAACAATATGGTGCTGTATATCTTGTGAATCT	conserved hypothetical protein	SAS0029	MSSA476	0	0	0	0	0.57	0.6235	0_tan	1	0.02	0.05	0.04	0.03	0.06	0.03	0	0	0.13	0	0	0	0
TTACTATTTCGAACAAAGACGTAACTGACGATTATAAACATGGAGCAATAGTTACATTAAAAATTTTGAA	conserved hypothetical protein	MW0378	MW2	1	0	0	0	0.21	0.0006	3_red	0	0.46	0.71	0.24	0.97	0.39	0.2	1	1	0.6	0.71	1	1	0
TTACTTCGAAATGTGTACCAAATAAAGTTGTTAGATTTATTTTGCGTACAGTCGTAGGCTACGGTATATT	putative membrane protein	SAR2494	MRSA252	0	0	0	0	0.19	0.4762	0_tan	0	0.88	0.92	0.8	0.99	1	0.63	1	0.82	0.67	1	1	0	0
TTACTTTTTATTGCTTTTCAAAAAGCGACAAAACAATTTATCGATATACAAAATAATTTAGGTAGTAATG	Dyp-type peroxidase family protein	SA0415	COL	0	0	0	0	0.06	0.2467	0_tan	1	0.98	1	0.99	0.99	0.97	1	1	1	1	1	1	0	0
TTAGACATCAGAATACCAAGGGTTTTCAGAAGAGATCACGCGCCAGTAGAATCTTTAACAGAAAATGAAC	hypothetical protein	MW1432	MW2	1	0	0	0	0.32	0.0015	3_red	0	0.36	0.62	0.17	0.92	0.34	0.26	0.86	1	0.75	0.71	0.69	1	0
TTAGTCCGCATATTCCATTGGCATTATTTATGTTATTCCAAATGATGTTTTGTACGATTGCAATCTCAAT	ammonium transporter family protein	SAR2130	MRSA252	0	0	0	0	0.26	0.3302	0_tan	0.0444	0.92	0.97	0.91	0.99	1	0.83	1	0.89	0.85	1	1	0	0
TTAGTCTTATTAAATTTCAGCACAGCAATAAATACAATGTTAGAAGTAACACTTATTGCAGGAGCCATCG	conserved hypothetical protein	MW0540	MW2	0	0	0	0	0.2	0.1701	0_tan	0	0.9	0.95	0.84	1	0.71	1	1	1	0.6	1	1	0	0
TTAGTTGAATTTTTTGATATTGACAATTTAAAGCCGAAAAAACTTAAATTCAAATCTCAAAACTGGTATT	hypothetical protein	MW1894	MW2	1	0	0	0	0.36	0.1881	0_tan	0.0008	0.2	0.29	0.16	0.43	0.09	0.09	0.59	0.73	0.58	0	0.3	0	0
TTAGTTTGTATCAGTATTAATAGTGATCATGCAAGAGAGATACAAGCACTCAGATATATGAATGATTATC	hypothetical protein	SA1781	N315	1	0	0	0	0.17	0.2464	0_tan	0.114	0.97	1	0.97	1	0.98	0.98	1	1	0.93	1	1	0	0
TTATAAAACGATACAAATCAGAAAATATTTATTTTTACTCATCAAATATTAAAGAAGACGATATTAAAAT	PENICILLINASE REPRESSOR	SAP012	N315	0	0	0	0	0.18	0.7363	0_tan	0.0038	0.95	0.96	0.91	1	0.98	0.9	0.96	1	0.93	0.9	1	0	0
TTATAAACGTACGATTATGATGAATGAATATAGAGCTAAAGCGGCACTTAAGAAAAATGATTTCGTATCA	fibrinogen-binding protein precursor-related protein	SA1169	COL	1	1	1	0	0.22	0.4738	0_tan	0.0013	0.88	0.91	0.83	0.97	0.48	1	0.97	1	1	0.6	1	0	0
TTATAAAGAACTATCAACAATATTAAAAATTTTATCAGATCCAAGTAGGTTAGAAATATTAGATTTACTT	arsenical resistance operon repressor	SAP016	N315	0	0	0	0	0.34	1	0_tan	0.0005	0.68	0.67	0.56	0.84	0.99	0.22	0.82	0.43	0.2	0	0.79	0	0
TTATAAAGAACTATCAACAATATTAAAAATTTTATCAGATTCAAGTAGGTTAGAAATATTAGATTTACTT	arsenical resistance operon repressor 1	SAR0690	MRSA252	0	0	0	0	0.31	0.3369	0_tan	0.0725	0.66	0.58	0.57	0.71	1	0.18	0.69	0.22	0.11	0.29	0.64	0	0
TTATAAAGCCTACTGCTTTCCTAGAGAAAAAACAAAGCATAACAATATTGAGTACAATGTATCGTTGTTT	hypothetical protein	MW0042	MW2	0	0	0	1	0.41	0.4776	0_tan	0.6793	0.04	0.07	0.07	0.03	0.02	0.02	0	0.44	0.1	0	0.14	0	0
TTATAAAGTGTATAACGGTAAGAAAGAATATAGTGCTTCTCTTATGACTTCATTTTTCACAGATGGAACA	response regulator	SAR1332	MRSA252	0	0	0	0	0.21	0.6297	0_tan	0.0354	0.7	0.74	0.66	0.8	1	0.32	0.74	0.5	0.5	0.56	1	0	0
TTATACCAAGCCCAGAAATGATGAGCTGTATTATTATTCGAGTATCGTTGAAGATTATAATGTTTTAGAA	conserved hypothetical protein	SA0287	COL	0	0	0	0	0.26	0.0507	0_tan	0	0.44	0.59	0.18	0.89	0.27	0.21	0.91	0.64	0.89	1	0.69	0	0
TTATACCAGTTCTATTGAATAAATTAATTAAAGAGGTATATTTACCATTATTTTTGACACCTTATATGTT	hypothetical protein	SA2444	COL	0	0	0	0	0.44	1	0_tan	1	1	0.99	1	0.99	1	1	1	0.83	1	1	1	0	0
TTATACCGAGAAGATGGCACAGAAGATATTAAGGTCATCAAGTATAAAGAGAATGAGAATGAAGTTTATT	hypothetical protein	SAV0871	Mu50	1	0	0	0	0.17	1	0_tan	0.0289	0.97	0.97	0.94	1	0.95	0.96	1	0.93	1	1	1	0	0
TTATACTGTTTATTGCCTTTGATAGTTAATTTGTCTATTTATGGTTTTTATGTTTTTGTTAAAAGAAAGT	hypothetical protein	SAP004	N315	0	0	0	0	0.36	1	0_tan	0	0.17	0.16	0.08	0.36	0.08	0.09	0.46	0.25	0.1	0	0.57	0	0
TTATAGATTTTCACAACACGTTGGTAAACAATATACCTACGGTAAAGGATTAGAAGAGCTGTCAGAAGTA	ORFID:SA0064~hypothetical protein, similar to transposase	SA0064	N315	0	0	0	1	0.22	0.5545	0_tan	0.5683	0.95	0.92	0.93	0.95	0.98	0.96	0.96	0.83	0.67	0.71	1	0	0
TTATATCGTAATAAGTCTTTTTCTGTAGTAAGAGACTTTATCGAGAAGCAAGAATTTCCCGAAAATTATA	hypothetical protein	SA1338	COL	0	0	0	0	0.1	0.3126	0_tan	0.0164	0.94	0.97	0.92	0.99	0.85	1	1	1	1	1	0.94	0	0
TTATATGGCAGATGTGTGCCTACCAAAGCATTCTACATCTTAAACGATGACCTAACTATGACGTTAATCT	hypothetical protein	SA0353	COL	1	0	0	0	0.42	0.0026	2_orange	0	0.16	0.39	0.04	0.74	0.16	0.15	0.69	0.38	0.29	0.5	0.5	1	0
TTATATGTAATAGCTAAAAAGATGGGTAAAGGCAATACAATAGCTGTAGTAAAAATCAAAGACGGTGGTA	hypothetical protein	MW1038	MW2	1	0	0	0	0.37	0.0135	1_yellow	0	0.33	0.54	0.18	0.79	0.25	0.13	0.91	0.93	0.4	0.8	0.57	1	0
TTATATTACGACTATACCGTATAATTTAACTGAGTATAGAGACTATTTTGAACCATTATTAAACAAAAGT	putative lipoprotein	SAR1494	MRSA252	0	0	0	0	0.37	0.3034	0_tan	0.2999	0.7	0.61	0.62	0.71	1	0.14	0.4	0	0.4	0	1	0	0
TTATATTCAGTTGTTGTCTTAATATTATTAGTTTTTGCTAATGGCTATTGGTCAATAATGTTAATCAGTT	quinolone resistance protein	SA0650	N315	0	0	0	0	0.04	0.187	0_tan	0.1068	0.91	0.96	0.91	0.96	0.82	0.98	1	1	1	1	0.83	0	0
TTATATTGGTAATCATATGCCAGTAAGTGACATGAAACTAAATGAATTGAAATCACATGACCGTAACATT	putative branched-chain amino acid transporter protein	SAR1419	MRSA252	0	0	0	0	0.22	1	0_tan	0.4516	1	0.99	1	0.99	1	1	1	0.9	1	1	1	0	0
TTATATTGTCATTAATTACATCAAGGTAAAACTAAAATATCATGATGCATTAGATGCATTTGGTATTCAT	ammonium transporter family protein	SA2031	COL	0	0	0	0	0.08	1	0_tan	0.1216	0.98	0.98	0.96	1	0.93	1	1	1	1	1	1	0	0
TTATCAAGGTCAAGATTACGGCAGTCTAATTATGGAACATATTATGAAGTATATTAAAAATGTATCTGTC	ORFID:SA2161~hypothetical protein, similar to attachment to host	SA2161	N315	0	0	0	0	0.15	1	0_tan	1	1	0.99	0.99	1	1	1	1	1	0.91	1	1	0	0
TTATCACATATCAAGTAGTATATGAAAATGGTAAACGAGATATTAATCACATTGATTTGAACAAGATAGC	putative non-ribosomal peptide synthetase	SAR0180	MRSA252	0	0	0	0	0.27	0.7471	0_tan	0.4119	0.67	0.69	0.7	0.64	1	0.49	0.55	0.4	0.55	0.44	0.29	0	0
TTATCCAATACACATTTGGGAATGAACCTGATGATATAGAGGTATTGGATTTTATTCATCATCAATTAAT	conserved hypothetical protein	MW0377	MW2	1	0	0	0	0.26	0.0012	3_red	0	0.25	0.48	0.13	0.74	0.13	0.02	0.9	1	0.1	0	1	1	0
TTATCGAGTAGAAGGAAATTTTTGTGTAATCATTTTGTACTGCTTACTGCCATTATTTGTAAATACGTCA	hypothetical protein	MW2430	MW2	0	0	0	0	0.22	0.0001	3_red	0	0.42	0.71	0.21	0.97	0.31	0.14	1	1	0.45	1	1	1	0
TTATCTTTCAATAAGCTCTTTTATTGTGGTTTCTCTCCAAATATCTCATCCAAATTTTTATTCAACACCG	hypothetical protein	MW0180	MW2	0	0	0	0	0.29	1	0_tan	0.1201	0.9	0.9	0.86	0.95	0.71	1	1	1	0.82	0.67	0.9	0	0
TTATGAAAACAGGAAAGCGTATGGTAATAGCCAATGTTGGTTTAGCTTTAGGGCCTGAAGAAAAGATTGA	conserved hypothetical protein	SA2391	COL	0	0	0	0	0.05	0.7402	0_tan	0.171	0.95	0.97	0.94	0.98	0.89	1	1	1	1	1	0.89	0	0
TTATGAAACCATTATTACCAAAAAGCATAACTATGGATAGAGGTAAGGAGTTCGCTCTATTTGAACAAAT	integrase/recombinase, core domain family, authentic frameshift	SA1573	COL	0	0	0	0	0.26	1	0_tan	0	0.72	0.71	0.59	0.89	1	0.21	0.77	0.55	1	0.6	0.6	0	0
TTATGAATTACAAAACGAAGAAGATAACGAGGAGTGCGAAGAGGAGTACGAAGAATACAAGGAGGACTAA	hypothetical protein	SA0335	COL	1	0	0	0	0.43	0.0123	1_yellow	0	0.26	0.48	0.1	0.85	0.23	0.15	0.69	0.6	0.75	0.33	0.92	1	0
TTATGAATTGAACGTATGGACTGTAAACAAACCAGCACGTGCAAACCAACTTGCTAATTGGGGAGTTGAT	glycerophosphoryl diester phosphodiesterase, putative	SA0031	COL	0	0	0	1	0.41	0.005	2_orange	0	0.96	0.82	1	0.39	0.96	0.95	0.75	1	1	0	0.33	1	0
TTATGCACCTCCAATTTTAGAAAAAAATAAAGATGGTCAAAGGTTAATTGTCACTTATGAAGTTGATTGG	ORFID:SA1813~hypothetical protein, similar to leukocidin chain lukM	SA1813	N315	0	1	0	0	0.18	0.3783	0_tan	0.0078	0.92	0.95	0.89	0.98	0.69	1	1	1	1	1	0.88	0	0
TTATGGACTCAGTATATGAATTATATAAGCAATTTGATAAACTAAGAGATTTATTTAAAGAAGAAGGACT	conserved hypothetical protein	SA0288	N315	0	0	0	0	0.26	0.122	0_tan	0	0.76	0.87	0.69	0.95	0.42	0.94	0.96	0.89	0.38	1	1	0	0
TTATGGATACTGGATCATATATTTTTATGTACTTTGCAATTAAGTGTTTATGGGTGAAACCTAAGGTAGT	conserved hypothetical protein	SA0269	COL	0	0	0	0	0.28	0.0038	2_orange	0	0.44	0.66	0.23	0.94	0.31	0.21	0.92	0.58	1	0.57	1	1	0
TTATGGATGAGGCGGAACGTTGTGATAAAGTTGGACTTATTGTCGACGGAAGAATATTTGCTATAGATAC	ABC transporter ATP_binding protein	SAR2452	MRSA252	0	0	0	0	0.23	0.5863	0_tan	0.0016	0.77	0.81	0.71	0.9	1	0.44	1	0.7	0.46	0.57	1	0	0
TTATGTCTGAACGGAAGATATCTCAATCAGAGCTATCAAGAAGGACTGGTATTGGCAGAAACTCAATTAG	repressor homolog	SAV1998	Mu50	1	0	0	0	0.35	0.2339	0_tan	0.0073	0.27	0.37	0.25	0.46	0.17	0.53	0.46	0.27	0	0.14	0.22	0	0
TTATGTTAAAATTAACAATTCCTACTGAAGCTAACTTATACAAAGACTTAGCTGAGCATCCAAACGTTGT	fructose-bisphosphate aldolase class I	SAR2684	MRSA252	0	0	0	0	0.23	0.7821	0_tan	0.0017	0.91	0.93	0.87	0.99	1	0.76	1	0.91	0.78	0.86	1	0	0
TTATTAATTCTGAAATGGCGACTCAAAATAAGGGAGAAGCTTTGAAAATTAAAGGTATGGTCTTATACAT	hypothetical protein	MW0073	MW2	0	0	0	0	0.27	0.0021	2_orange	0	0.31	0.54	0.14	0.85	0.21	0.11	0.96	1	0.63	0.33	0.58	1	0
TTATTATTTTACTTGCATCTTTTAGTGAAAGTTTGTATTTTACTTTCCAGAAAAAATACATAGAAAAATA	integral membrane domain protein	SA0090	COL	0	0	0	0	0.19	0.2137	0_tan	0	0.82	0.89	0.76	0.97	0.52	1	0.97	0.7	0.95	0.8	1	0	0
TTATTGAATACCACAATGGATGGTTTTGATGTTGTGACGGGTGGGATCAATGAAATTGCACCTTATAAAC	putative gamma-glutamyltranspeptidase	SAR0202	MRSA252	0	0	0	0	0.19	0.7772	0_tan	0.0188	0.92	0.94	0.89	0.98	1	0.76	1	1	0.8	1	1	0	0
TTATTTAGCGTTAATGGCATTCGACCAAAATTTACTCTCATTAAATCATACTGAACAACAATGGGATAAA	methicillin resistance protein	SA0039	N315	0	0	0	1	0.31	0.0005	3_red	0	0.77	0.51	0.95	0.04	0.81	0.88	0.13	0.25	0.4	0	0.1	1	0
TTATTTGATTCTAAGCATGATATTAATCATTATATTCAATATTTAATACAACTTGGCTATCCTTTAGACA	putative 3-dehydroquinate synthase	SAR1476	MRSA252	0	0	0	0	0.15	0.2672	0_tan	0.0268	0.91	0.95	0.89	0.97	1	0.69	1	1	1	0.71	1	0	0
TTATTTTAAATATCATTATCAATCCAGAAGTATTTACTATTCACTTTTACAATAATCAATCATTTAACTA	conserved hypothetical protein	SA0675	COL	0	0	0	0	0.09	0.3206	0_tan	0.0006	0.9	0.94	0.86	0.98	0.67	1	1	1	1	1	1	0	0
TTATTTTATTAGACAAGGTAAACGATCCAAACCTTAAAGAAAGAATAGAAAATTTTAAGTTTTTTGGACA	putative membrane protein	SAR0442	MRSA252	1	0	0	0	0.39	1	0_tan	0.0037	0.83	0.82	0.74	0.93	1	0.42	0.94	0.57	0.56	1	0.67	0	0
TTCAAAATTTTAAACTAATTCATAATAATACTATTTTAGAAAATATAAGTATGCCACTGGTATATACAAA	ORFID:SA0192~hypothetical protein, similar to ABC transporter ATP-binding	SA0192	N315	0	0	0	0	0.37	1	0_tan	1	0.54	0.53	0.53	0.54	0.02	0.98	0.85	0.86	0	0	0	0	0
TTCAAGTCCTGGAAAAAACCAAATTATATACAAAGAAAGCCTTACTTATAATAAATTAAGTGAACATTAA	hypothetical protein	SA0203	N315	0	0	0	0	0.31	0.2797	0_tan	0	0.82	0.88	0.75	0.99	0.26	1	1	1	0.33	1	1	0	0
TTCAATTAACTTCGACCCAATTTTAAAGCAAATCATTAACGATAGATTAGAAAGCTTAATGATTCCAATG	transcriptional regulator NirR	SA2399	COL	0	0	0	0	0.04	0.2276	0_tan	0.4978	0.98	1	0.98	1	0.97	1	1	1	1	1	1	0	0
TTCAATTAAGAGTTAAGAAGCGAGCATATAGTGTCGAAATAGTCGTTTTAGATCATGAAGGAAATTCAAT	hypothetical protein	SA1797	N315	1	0	0	0	0.09	1	0_tan	0.4372	0.97	0.97	0.98	0.96	0.97	1	0.97	0.92	1	0.8	1	0	0
TTCACCAGGCCCTGGGCATCCATTAGACGACCAACATTTAATGAAAATTATCTCATCCTATCAAGATAAA	anthranilate synthase component II	SAR1381	MRSA252	0	0	0	0	0.23	0.2335	0_tan	0.0011	0.87	0.92	0.83	0.98	1	0.66	1	0.89	0.8	0.86	1	0	0
TTCACTAAATATAGGCGTGTTACTACTTTCTTACTCCCGTTTTGTAATCATGAAAGTGACAATGAATAAA	ORFID:SA2014~truncated IS232 IstA protein homolog	SA2014	N315	0	0	0	0	0.35	0.4179	0_tan	0.0688	0.62	0.54	0.64	0.48	0.25	0.98	0.63	0.14	0.1	0.11	0.27	0	0
TTCACTTTGGTTCACCATGAAGATGGATTCGCAGTTCTAATGTGTAATGAGGTTCGGATTCATCTATGGG	bleomycin resistance protein	SA0032	N315	0	0	0	1	0.48	0.003	2_orange	0	0.96	0.78	0.99	0.38	0.96	0.98	0.25	0.5	0.86	0	0.57	1	0
TTCAGCAATAGATATTGATAAGGCATCTATTACGGGAACTATAGAAAATCAGTATGTTAACAACAGTTTT	hypothetical protein	MW0374	MW2	1	0	0	0	0.3	0.0042	2_orange	0	0.09	0.26	0.07	0.4	0.04	0	0.4	1	0.1	0	0.36	1	0
TTCAGTAAAAATAGATACCCCTTTTAAAGATAATTCTTTAGATAATTTAAAAATATACGCTTTATACGAT	hypothetical protein	SA1639	N315	1	0	0	0	0.38	0.6155	0_tan	0.2988	0.58	0.63	0.57	0.67	0.05	0.98	0.87	0.75	0	0	0.13	0	0
TTCATCGTTGGGTTAGTACTTTTAATTGCGCTTATTGTAATTTGTATTTTAATTAAACAGAAAATTTATG	hypothetical protein	SA2483	N315	0	0	0	0	0.25	0.5744	0_tan	0.3366	0.79	0.83	0.78	0.85	0.59	0.98	0.9	0.75	0.95	0.5	0.44	0	0
TTCATTTAATACCTATTATTAAAAACCAGCAATCAAAAATCGAAAAACTGGAGGAATTAATAAATGAATG	hypothetical protein	MW1893	MW2	1	0	0	0	0.29	0.8761	0_tan	0.2023	0.41	0.43	0.38	0.48	0.17	0.5	0.55	0.83	0.67	0	0.5	0	0
TTCATTTGCAGAGGGACAAGGACGTCAAAGAGCAAATATAAATGGTGATGTCAAAACACCTAAAAACTAG	hypothetical protein	SA0073	N315	0	0	0	1	0.46	0.0006	3_red	0	0.91	0.66	0.92	0.24	0.98	0.9	0.67	0.2	0.17	0	0.2	1	0
TTCCAAGCAATAAACTTATCGAAAGTTACTTAATGAACATAAAAGACACTAATGAGGAGTATAATTTTTA	DNA-binding protein	SAR0367	MRSA252	0	0	0	0	0.36	0.4205	0_tan	0.8648	0.55	0.48	0.51	0.53	1	0.03	0.25	0	0.25	0.14	0.09	0	0
TTCCAAGCGAACAGATTATAAGCAGGTTGAAAGCAGCGAATGTCAAACTTATAGGTACAGCAACAAGTGT	conserved hypothetical protein	SA0922	COL	0	0	0	0	0.33	0.0581	0_tan	0	0.45	0.6	0.28	0.89	0.28	0.24	0.87	0.5	1	1	0.6	0	0
TTCCAAGTAATGAATGATAAGAATATTGAAGCATGTACGTCTTTGAAAATTCGATTTTTAAATAATCTAG	conserved hypothetical protein	SA2004	N315	0	0	0	0	0.13	1	0_tan	0.506	0.99	0.99	0.98	1	1	1	1	0.6	1	1	1	0	0
TTCCTAACGTGATTAATATTCATTTAAACAATGATTTAGTAGTAAAAGGTACAAAGAACGAGACTTTTCG	ABC transporter permease protein	SAR2782	MRSA252	0	0	0	0	0.24	0.7045	0_tan	0.0115	0.83	0.81	0.74	0.9	1	0.41	0.96	0.5	0.54	1	1	0	0
TTCGAAGAAAAACTAAGTCAAATGTACAATGAAATTGCAAATGAAATCAGTGGGATGATACCAGTAGAGT	conserved hypothetical protein	SA0290	N315	0	0	0	0	0.06	0.192	0_tan	0.0598	0.96	0.99	0.96	1	0.93	0.98	1	1	1	1	1	0	0
TTCGGTCAAAATATAGGACTTTTATGCATTGGTATAACACTGATTGTTATTTCGTTGATTTTAAATCATG	hypothetical protein	MW1907	MW2	1	0	0	0	0.34	0.0153	1_yellow	0	0.15	0.33	0.12	0.47	0.06	0.04	0.71	0.85	0.54	0.17	0.09	1	0
TTCTAAAGAAATGATATTAATTCTAGACTTTACCGAAGCAACAAATCTCACTGATTTATTTAAGACCATA	conserved hypothetical protein	SA0069	COL	0	0	0	0	0.38	0.0043	2_orange	0	0.48	0.71	0.32	0.9	0.39	0.19	1	1	0.95	0.4	0.58	1	0
TTCTGAAAGATTTAAAGAGTTAGTTAATCTTTTCAATGAGCGTTATGACATCATTATTGTCGATACACCG	capsular polysaccharide synthesis enzyme	SAR0152	MRSA252	0	0	1	0	0.27	0.6053	0_tan	0.1112	0.72	0.76	0.7	0.81	1	0.44	0.7	0.56	0.54	0.43	1	0	0
TTCTGCAGACAGTTATTGCTTTTTTAGTATTGCTTATTTTTGTGGTAGGGCACGCTGCAGCAAATGCAAT	hypothetical protein	SA0421	COL	0	0	0	0	0.43	0.2624	0_tan	0	0.66	0.75	0.46	0.97	0.62	0.32	0.95	0.5	1	1	0.91	0	0
TTCTGGCGCGTCATTTGTCATTGTATTAGTAACGATTATTATTCCATCATTAGAATACTACTCACTTTAT	FecCD transport family protein	SAR2267	MRSA252	0	0	0	0	0.18	0.5857	0_tan	0.0425	0.8	0.83	0.77	0.88	1	0.6	0.89	0.7	0.58	0.63	1	0	0
TTCTGTACCTTACAGATACTCAAAATATCATTATTGATGAACGTCATTTACTAAAACAAGGAGGTCAGGA	hypothetical protein	MW0037	MW2	0	0	0	1	0.34	0.0985	0_tan	0.0015	0.3	0.43	0.27	0.54	0.25	0.25	0.64	0.78	0.54	0.29	0.54	0	0
TTCTTAAGACCTAAATTAATGTTATTTTTTAATAATTTACACCAAATTAATAGCAAAAATTATGTTATTC	hypothetical protein	SA0674	COL	0	0	0	0	0.22	0.414	0_tan	0.3817	0.99	1	0.99	1	0.98	1	1	1	1	1	1	0	0
TTCTTTATTACAGAGTGAATCGGATTGGTGGAAATCGAAGTTTTGAGATTTTTACCAATCCGATTTTTTG	hypothetical protein	SAR2384	MRSA252	0	0	0	0	0.31	0.1857	0_tan	0.6497	0.95	0.99	0.96	0.98	0.96	0.97	0.93	1	1	1	1	0	0
TTGAAATTAAGAAAGGTAATGAAGAACCACAAAATAGTCTGTATCAAATTTATAAAGAAAATATCTCATT	exotoxin	SAR0422	MRSA252	1	1	0	0	0.37	1	0_tan	0.0238	0.74	0.74	0.67	0.84	1	0.21	0.57	0.33	0.33	0.57	1	0	0
TTGAACTTCAGGCAAAACAATTAAAAGAACTACATCGACAAACTGGTCATAAAATTCAATGGTACATTAT	putative UTP--glucose-1-phosphate uridylyltransferase	SAR2262	MRSA252	0	0	0	0	0.24	0.6758	0_tan	0.0186	0.84	0.87	0.8	0.93	1	0.62	0.94	1	0.62	0.63	1	0	0
TTGAAGCAACGATGAATGTTCCTGTTGATTACTATGTACGCGTTAATATGAAGGCCTTTGTAGAAGCTGT	putative exported protein	SAR1029	MRSA252	0	0	0	0	0.21	1	0_tan	0.0047	0.81	0.81	0.73	0.9	1	0.53	0.94	0.67	0.58	0.63	1	0	0
TTGAAGGACCAATAAAGCTGCACAAAGAATTTGCAATACCTGTTAAGTTCACTATCAAAGTAGTACTAAC	hypothetical protein	SA1765	N315	1	0	0	0	0.14	0.7811	0_tan	1	0.94	0.93	0.94	0.94	0.97	0.97	0.92	0.75	0.92	0.25	1	0	0
TTGAATGGCCTCAGTACTTAATTTATATTTTATTTGTTTTATGTACTTTGACTGTTTTAAAATTAATCAT	conserved hypothetical protein	SAR2162	MRSA252	0	0	0	0	0.32	0.8707	0_tan	0.7386	0.66	0.65	0.64	0.68	1	0.38	0.7	0.38	0.4	0.3	0.33	0	0
TTGAATTTGGTGATGTAAAAAACGATGTAAGTGTTCTGAGGATAAAAGAATCAATATCTCACCCTGTTAG	hypothetical protein	SAV0895	Mu50	1	0	0	0	0.32	0.2471	0_tan	0.0183	0.75	0.83	0.72	0.88	0.71	0.86	0.88	0.75	0.64	0.67	0.93	0	0
TTGACAAGGTCTTAAGCACTGACGTTACAAATAGCCATGATATTAATGAATTATATTTATTTCTTAAAAA	hypothetical protein	SA2559	COL	0	0	0	0	0.25	0.0169	1_yellow	0	0.43	0.61	0.16	0.93	0.35	0.18	0.89	0.67	1	0.67	0.85	1	0
TTGACACATGGTACAAACGCTATTGATTACATTACATTTGATCCAAATACTAATACGAATGGTATTACAG	ORFID:SA1268~hypothetical protein, similar to streptococcal adhesin emb	SA1268	N315	0	0	0	0	0.35	0.2156	0_tan	0.1238	0.86	0.77	0.85	0.74	0.74	1	0.92	0.44	0.44	0.5	0.57	0	0
TTGACGGAAAGAAACCCTATGGATTTCTAAAGTCTATCATTACCTATGCTCTACGCCCTAAAGTAACCTA	hypothetical protein	SAV0403	Mu50	0	0	0	0	0.33	0.6591	0_tan	0.0026	0.13	0.17	0.09	0.28	0.14	0.04	0.36	0	0.57	0	0.15	0	0
TTGACTTCAAACCACATAGCTATCAAAAGTATGCAATAGATAAAGTGATAGATAATGAGAAATACGGTCT	hypothetical protein	MW1405	MW2	1	0	0	0	0.28	0.6846	0_tan	1	0.96	0.98	0.96	0.97	1	0.89	1	1	1	0.88	1	0	0
TTGAGCACTGTCCTGACAATGTCCTGAAACATATTGAAAATAGCGAAATGGGACACCTATCAAAAATTAG	hypothetical protein	SAV0792	Mu50	1	0	0	0	0.37	0.096	0_tan	0	0.2	0.33	0	0.75	0.18	0.1	0.69	0.25	0.38	0.57	0.67	0	0
TTGAGTAGGAAGTATAAAATAGATTTAAAAGCAATTAATCAAAATACTGAGTCTACAAGTGCTATTTCGA	hypothetical protein	SA0487	COL	0	0	0	0	0.4	0.1028	0_tan	0	0.24	0.38	0.17	0.58	0.24	0.09	0.3	0.3	1	0	0.4	0	0
TTGATAATAAGAGTTTAAATATTAACGGAACAATCCATTGGTTTCACGATGAATCTGGTGGATTCGGTGT	pathogenicity island protein, integrase	SA0885	COL	0	0	0	0	0.42	0.2097	0_tan	0.0004	0.16	0.26	0.13	0.42	0.05	0.08	0.46	0.2	0.93	0	0.29	0	0
TTGATACATTTAAAATTTCACATAATCCTGCTGAAAACGAAGGGAAGTCTGTCTTAATCATTAATGGTGC	hypothetical protein, similar to alginate lyase	MW2112	MW2	0	0	0	0	0.08	0.4475	0_tan	0.4703	0.99	1	0.99	1	0.98	1	1	1	1	1	1	0	0
TTGATGAAAAATATGGATAAACTAATAAGTAATTATTCACATTCTTTCTATACAATTACTATAGATGACC	hypothetical protein	SAV0801	Mu50	1	0	0	0	0.36	0.6564	0_tan	1	0.14	0.16	0.16	0.14	0.74	0	0	0.09	0.18	0	0	0	0
TTGATGAAACCCTACGTGGCAGAATGGAAACGAAACTCATCTCTAAGATTTTATCGTTCGAAATTAAATA	hhypothetical protein	SAV0394	Mu50	0	0	0	0	0.39	0.1454	0_tan	0	0.14	0.24	0.08	0.47	0.13	0.06	0.5	0.25	0.64	0.17	0.2	0	0
TTGATGGTAAAGGTCTAAAGCTACCAATCGTAAAGAATAAAAATATAAAAATAGATCATTGGCTACCAGT	hypothetical protein	MW0752	MW2	1	0	0	0	0.2	0.0001	3_red	0	0.36	0.65	0.07	0.99	0.35	0.24	0.96	0.83	0.5	0.71	0.87	1	0
TTGATTAAAAGCACTCGAAGGTTACAGGTAGAAAAATACATGGATAGCTTTACAGACAAAGAACTATCCT	hypothetical protein	SAV0397	Mu50	0	0	0	0	0.36	0.0226	1_yellow	0	0.16	0.33	0.09	0.53	0.13	0.07	0.5	0.4	0.6	0.38	0.46	1	0
TTGATTCCAATGGATACCATTCCGGATAATTTAAATTCATTTAATAAAAATGAAATATATTATATTGTAT	conserved hypothetical protein	MW1700	MW2	0	0	0	0	0.1	1	0_tan	0.0367	0.92	0.93	0.88	0.96	0.76	0.98	1	1	1	1	0.84	0	0
TTGATTGGTTTTATTTATGTATGAATGAACAACTTTTTGACATCATTAAGAATATAAATGATTTTGAAAG	hypothetical protein	SA1863	COL	0	0	0	0	0.16	0.506	0_tan	1	1	0.98	0.99	0.99	1	1	1	1	1	1	0.78	0	0
TTGATTTAAATGACTATTATGCATTGTCAGATAAGTCGGCAAAGAAAACTATATTTTATGGACGTAATGT	truncated replication initiator protein	MW0120	MW2	0	0	0	0	0.26	0.0201	1_yellow	0	0.3	0.48	0.16	0.74	0.24	0.08	0.81	0.92	0.89	0	0.43	1	0
TTGATTTTAAGGTGAAAAAACGTGTGGATTTCTTAAAGTTCTATAATGACAATGAACTTATAAGTACCAA	truncated hypothetical protein, similar to enterotoxin SEO	MW0052	MW2	0	1	0	0	0.39	0.0111	1_yellow	0.0001	0.1	0.27	0.1	0.37	0.14	0.05	0.18	0.92	0.09	0.13	0.36	1	0
TTGATTTTAGAACACAAATGGTAGGACATCCAGAGCAACTTTATAAGTATTATTATGATAGAGGATATAC	fibronectin-binding protein A	SA2511	COL	0	1	1	0	0.21	0.0444	0_tan	0	0.26	0.41	0.16	0.58	0.14	0.07	0.58	0.21	1	1	0.31	0	0
TTGCCAAAAATACAAAAAATAATATGCGACAATTATACGCTTATTATAATAATAGTCAAATGCATTTTTT	hypothetical protein	SA2457	COL	0	0	0	0	0.29	1	0_tan	0.0459	0.94	0.95	0.91	0.98	0.81	0.98	1	1	1	1	0.82	0	0
TTGCTCGACCTGGTGTTCAATCTAAGGCATCTGCTCCAAAGGCTTGGGGTGGAAACAAAACATTTTATAG	hypothetical protein	SAP019	N315	0	0	0	0	0.16	1	0_tan	0.0055	0.94	0.94	0.9	0.99	1	0.8	1	1	0.88	1	0.94	0	0
TTGCTGACAAATCTCTTGCACCACAAGGACAAACAGGTATTTATGTTTTAATGCCAACACCAGAACTTAA	squalene synthase	SAR2642	MRSA252	0	0	0	0	0.23	0.7581	0_tan	0.35	0.66	0.63	0.68	0.61	1	0.46	0.38	0.33	0.5	0.38	0.33	0	0
TTGGATATAAACGATTAAGTAAAATGCTTTTTCAGTTTGAAATTAATCATATAAATTTCTTATGGGAGGG	hypothetical protein	SA0853	COL	0	0	0	0	0.39	0.6736	0_tan	0.0005	0.95	0.97	0.86	1	0.92	0.93	1	0.92	1	1	1	0	0
TTGGCGTTCGCGATCATTCATCTCACCAAGAAGTACTAGAAAATAATTCAGCTTATGAAGAAGTTGATAT	hypothetical protein	SAR0405	MRSA252	0	0	0	0	0.16	0.5605	0_tan	0.0001	0.83	0.86	0.75	0.95	1	0.6	1	0.71	0.57	0.78	1	0	0
TTGGGGGATCTTACAGATAGAGTAATTAGGAAAAATAAAAACTTAGAATCGAAAAAGCCTTTAACAATAT	probable restriction modification system specificity subunit	SA0392	N315	1	0	0	0	0.31	1	0_tan	0.013	0.91	0.9	0.95	0.83	0.89	0.98	0.75	0.63	1	0.5	0.86	0	0
TTGGTACATTATATCGTCATTTTGAAAGTAAAACATTGTTGTGTCAGGCTATTATGGATAAAAAAGTCGA	putative DNA-binding protein	SAR0097	MRSA252	0	0	0	0	0.28	0.8625	0_tan	0.1532	0.74	0.75	0.7	0.81	1	0.51	0.92	0.67	0.46	0.38	0.5	0	0
TTGGTCGGAGATATTAGAGATACACATTATAAACTGTCTGATGATTCAGTTATTAGCATTATAGATTTTA	hypothetical protein	MW1418	MW2	1	0	0	0	0.27	0.004	2_orange	0	0.37	0.6	0.14	0.91	0.43	0.21	0.86	0.64	0.42	0.67	0.94	1	0
TTGGTCTTTATTACAGATCTTCTTACAGCTGTTTGTTTAATGGGCTTTAATTTATATATTCCTGTGTATC	putative transport protein	SAR2260	MRSA252	0	0	0	0	0.23	1	0_tan	0.3042	0.76	0.76	0.72	0.79	1	0.42	0.75	0.44	0.54	0.57	1	0	0
TTGGTGAATTGGCTTTAATCGTCTATATTATTTTTTATCACGTTTATGGAGCTAATAACCAAATAACGTA	putative membrane protein (pseudogene)	SAR0685	MRSA252	0	0	0	0	0.3	1	0_tan	0.0005	0.82	0.83	0.72	0.93	1	0.32	0.91	0.93	0.83	0.9	0.93	0	0
TTGGTGTGTTACAAGATTGGGTCAAACGAGGATATAAAGAGAGTCCTAAAGAAGTAGCAGAAATTATGAA	putative membrane protein	SAR2451	MRSA252	0	0	0	0	0.23	0.5554	0_tan	0	0.81	0.85	0.72	0.97	1	0.49	1	0.55	0.6	0.71	1	0	0
TTGGTTCACCAAAAGATATTACATCCTTTGTTATACCGATTGGCTATACGTTTAACTTAGACGGATCAGC	putative proton/sodium-glutamate symport protein	SAR2472	MRSA252	0	0	0	0	0.14	0.6024	0_tan	0.2475	0.98	0.99	0.97	1	1	0.96	1	1	0.91	1	1	0	0
TTGTAAAGTCGTTCGTAAAATTGATAATGAGGTACCATCAGAAGCATTGAACGATGAAACACTAAATTAG	putative acetyltransferase	SAR2635	MRSA252	0	0	0	0	0.18	0.6722	0_tan	0.0593	0.97	0.98	0.95	1	1	0.95	1	0.92	0.86	1	1	0	0
TTGTAAATTCTCAAATGGCAATTCAAAATAAAGGAGAACCTATGAAATCAAAAGGCATGGTTCTGTATAT	hypothetical protein	SA0095	N315	0	0	0	0	0.22	0.8092	0_tan	0.0065	0.89	0.91	0.84	0.97	0.63	1	1	1	0.87	1	0.82	0	0
TTGTACAAGTTGAAGAAAAATCAACGCAACCAAAAGGTAGAAAATTCAAAGATTTCACTAGCAAATTTAA	serine protease SplD	SA1628	N315	1	1	0	0	0.08	1	0_tan	0.4661	1	0.99	1	0.99	1	1	1	1	1	1	0.91	0	0
TTGTACACTGACTCTAAGTTAATTGCGGATAGTGTTAACGCTGGTTATGTAAAAAATGCCAAATTCAAAC	conserved hypothetical protein	SAR1446	MRSA252	0	0	0	0	0.22	0.8438	0_tan	0.003	0.82	0.84	0.76	0.92	1	0.54	1	0.64	0.46	0.75	1	0	0
TTGTACCTCTAAATATTTAAATAATCTCATTGAACAAGATCATCGTCATATCAAAGTAAGGAAAATAAGT	putative transposase	SAR0726	MRSA252	0	0	0	0	0.19	0.1557	0_tan	0.0162	0.86	0.93	0.84	0.96	1	0.69	0.92	0.92	0.93	0.86	1	0	0
TTGTATCATTTGTTGCATCAATGTTGCATCACTAAAAATGATGCAACACCTACGATTACTTTTTACACTC	hypothetical protein	MW1407	MW2	1	0	0	0	0.33	0.5158	0_tan	0.1874	0.92	0.96	0.91	0.97	1	0.81	1	1	0.92	1	0.85	0	0
TTGTCATTTAGTAATAAGATTGCATCAGCAGCTATAATTGATCGTTTTGTTCACCATTCAAAAGTATTTA	putative insertion sequence protein	SAR0091	MRSA252	0	0	0	0	0.36	0.8592	0_tan	0.007	0.72	0.69	0.61	0.82	1	0.14	0.94	0.33	0.44	0.43	0.55	0	0
TTGTCATTTCAATCGTTTTAGCTATATTTTTATTGATCTTGTTAAGTAGCATTTCTCATAAGATGAAAAC	hypothetical protein	MW1410	MW2	1	0	0	0	0.51	0.1566	0_tan	0.2281	0.88	0.77	0.77	0.87	1	0.57	0.73	1	0.88	0.75	0.7	0	0
TTGTGATTATCATGAGCGAACTAGAAGTGATGTATTAATAGATGATGATATAAATACTGATGAATTCTTT	hypothetical protein	SAR0381	MRSA252	1	0	0	0	0.28	0.3638	0_tan	0.0017	0.74	0.81	0.67	0.88	1	0.26	0.91	0.44	0.93	0.5	0.86	0	0
TTGTGATTTATGTATTAATTTGGATAATTCAATTCTTTAAAAACAAGAACTACGTAGACACTATTAACGA	hypothetical protein	SA2154	N315	0	0	0	0	0.03	1	0_tan	1	1	0.99	0.99	1	1	1	1	0.93	1	1	1	0	0
TTGTTAACGCCATTAGTATCAGTGGTTGCATTACAATTAATTTCATACTATGCAGCATTACACAGAGATT	glucosamine--fructose-6-phosphate aminotransferase (isomerizing)	SA2145	COL	0	0	0	0	0.05	0.0471	0_tan	0.1217	0.96	1	0.96	1	1	0.93	1	1	1	1	1	0	0
TTGTTGACAGATTAGCGACCGATAAAGAGTTTTATATTTTTGACTCCCTTATACAAGGACTTAGTTATCA	truncated hypothetical protein	MW1950	MW2	1	0	0	0	0.31	0.026	0_tan	0	0.49	0.66	0.31	0.93	0.42	0.24	0.87	1	1	0.63	0.9	0	0
TTGTTGTAATAAGGCCAATATTATTCAGTTGTTGGATATTTATTTTGAATATGATTTTATCAAGATTATT	hypothetical protein	SA0284	N315	0	0	0	0	0.15	1	0_tan	0.0461	0.92	0.91	0.87	0.96	0.79	0.98	1	0.92	0.88	1	0.79	0	0
TTGTTTAATGTACCTCAGAAACATTCACGTGATCCGTACTGGTTTGATAATACTTATAACCAAATGTTCA	hypothetical protein	SA1788	N315	1	0	0	0	0.05	0.4978	0_tan	0.2189	1	0.98	1	0.98	1	0.98	0.96	1	1	1	1	0	0
TTTAAAAAAACAGATTATCGATATCAGTAGTAAAGTACAAGCATTAACCCAAAAATATAGAGATATTGAC	hypothetical protein	SA0378	N315	1	0	0	0	0.09	1	0_tan	1	0.99	0.99	0.99	0.99	1	1	0.95	0.88	1	1	1	0	0
TTTAAAAATTAACGCTGAAGATCCTTCTGGTAGAATGAAACTCGATTTTGATAGTATGAAATTAGTAGAT	hypothetical protein	SAR0365	MRSA252	0	0	0	0	0.38	0.4026	0_tan	0.1522	0.64	0.55	0.55	0.69	1	0.14	0.5	0.13	0.27	0.17	0.38	0	0
TTTAAAACATTCTGAAGAGCCGACATTATACTTAGCAGCAGATACAGTTTGGTTTGAAGGGGTTGAAAAA	conserved hypothetical protein	SA2259	N315	0	0	0	0	0.22	0.6682	0_tan	0.3912	0.86	0.88	0.85	0.9	0.75	1	0.88	0.92	0.58	0.5	1	0	0
TTTAAACTCTACCTCAATGAACAGGAAGTATCCGTAAAAAATGTTGGGAAAGAAATTCAAAAAGCATTTG	hypothetical protein	SAV0402	Mu50	0	0	0	0	0.27	1	0_tan	0.261	0.04	0.05	0.06	0.02	0.02	0	0	0	0.54	0	0	0	0
TTTAAAGAGCGTGAAGGTAAATATCAAGTAGAAGGTTGTTTTATTGAATCAGGTGCACTTAATAATAAAA	conserved hypothetical protein	SA1339	COL	0	0	0	0	0.36	0.3101	0_tan	0	0.77	0.84	0.67	0.98	0.98	0.13	0.93	0.92	0.94	1	1	0	0
TTTAACAATTTTCATATTAAACTTACTTTTTTCAATACTTTATTGTTTACCTATACTGTTTTATTTATGA	putative membrane protein	SAS1865	MSSA476	0	0	0	0	0.61	0.0606	0_tan	0	0.59	0.78	0.41	0.93	0.67	0.32	0.88	0.9	0.86	1	1	0	0
TTTAACACAACTAGAATTTAGTGATGAAGATGTTGATATTATAATTAACTCAAATGGTGGTAACCTAGTA	ORFID:SA1775~hypothetical protein, similar to scaffolding protein [Bacterio	SA1775	N315	1	0	0	0	0.14	1	0_tan	0.7244	0.96	0.96	0.95	0.97	0.99	1	0.96	0.82	0.88	0.67	1	0	0
TTTAACCTTGATGCAGTTTCATGGTTACATGTTTTAAAAAATATCGTTTTTGCTTTCTTAGGTAACTTTG	ORFID:SA2191~hypothetical protein, similar to NirC	SA2191	N315	0	0	0	0	0.06	0.1217	0_tan	1	0.97	1	0.98	0.99	0.95	1	1	1	1	1	1	0	0
TTTAAGAGTAGTTCCGCAATCCATTAAGCTAATGAATGATAAATCATTAGATACACCTATCAAAATCGAT	conserved hypothetical protein	SA2379	COL	0	0	0	0	0.23	1	0_tan	0.1112	0.99	0.98	0.97	1	1	0.89	1	1	1	1	1	0	0
TTTAAGTAATGTTACAGTTTACGCTTTAGCAAAGTTATATGATATTGAGGTAGACCAGATAAAGGTCTAA	hypothetical protein	SAV0852	Mu50	1	0	0	0	0.38	0.2252	0_tan	0.0006	0.16	0.25	0.13	0.39	0.04	0.11	0.38	0.5	0.64	0.56	0.17	0	0
TTTAATATTATTACTAGTTATAGGATTTTTAGTGTTTATAGGAACATATATGATTTTATCAATCAATTTA	Na1/H1 antiporter, MnhC component, putative	SA0681	COL	0	0	0	0	0.18	0.7556	0_tan	0.0062	0.94	0.95	0.9	0.99	0.74	1	1	1	1	1	0.93	0	0
TTTAATGGCTTTGGTCGTATCTCTAATCGAATTAAAAGAACAAAATGAATTGCCTCATGGAACGATTAGA	peptidase, M20/M25/M40 family, authentic frameshift	SA2007	COL	0	0	0	0	0.53	0.0073	1_yellow	0	0.41	0.67	0.35	0.89	0.21	0.47	0.6	0.71	1	1	0.92	1	0
TTTAATGGTATTAGTCGCATTACCTTCACTTGTTTTAGCTATATATGATTATATGAGTTTTAGAATTTCT	conserved hypothetical protein	SA0362	N315	0	0	0	0	0.04	0.1201	0_tan	0.1139	0.97	1	0.97	1	0.95	1	1	1	1	1	1	0	0
TTTAATTAAGGATTTATCAATAGTAAAAGTTTATTCATCTTATATTAATCCTCCTAATAATAGATATAAC	probable ATP-dependent helicase	SA1806	N315	1	0	0	0	0.32	0.1084	0_tan	0.0057	0.46	0.33	0.48	0.26	0.75	0.26	0.15	0.07	0.08	0	0.83	0	0
TTTAATTTTATTAACAAAATTAAATATGACGCGTGAATTAAAAAATGATGTAACGTCTCTTTGTATACCT	hypothetical protein	SA2027	COL	0	0	0	0	0.42	0.1275	0_tan	0	0.82	0.92	0.71	1	0.35	1	0.96	1	1	1	1	0	0
TTTACAGATTATGTAAATGATAAGCAAAATATTAATGGGAAATTTTCATTACCACTATTTACAGACAGAG	Clumping factor B	MW2551	MW2	0	1	1	0	0.23	0.0274	0_tan	0	0.24	0.4	0.15	0.58	0.16	0.04	0.38	1	0.31	1	0.54	0	0
TTTACAGCCCTATGTTAGCCAGTCTAAATGAACAACAGTTAAAGAGTATGTTGAGACAGGTACTTTTTTT	hypothetical phage protein	SAR1528	MRSA252	1	0	0	0	0.23	0.1364	0_tan	0.0935	0.85	0.76	0.76	0.86	1	0.65	0.88	0.4	0.73	0.6	0.79	0	0
TTTACCACTGCATTAAAAGTATTAGACGACCAACTTCCAGACGGTCAGACATTCCCTAGAATTGTTATAC	hypothetical protein, similar to integrase [Genomic island nu Sa alpha3mw]	MW0745	MW2	1	0	0	0	0.48	1	0_tan	0.1644	0.16	0.17	0.14	0.26	0.14	0.09	0.29	0.58	0.18	0	0.14	0	0
TTTACTTTGGCTTTGCTGATCGACAAACTTATGAAGACTTTAAAAATTCTGATGCTTTTAAAGATCATTT	signal transduction protein	SAR1926	MRSA252	0	0	0	0	0.21	0.4883	0_tan	0	0.75	0.8	0.65	0.92	1	0.36	1	0.58	0.46	0.56	1	0	0
TTTAGAAAGGAGACGCCTAATGATTACAATTAGTACCATGTTGCAGTTTGGTTTATTCCTTATTGCATTG	hypothetical protein	SAS059	N315	1	0	0	0	0.08	1	0_tan	0.6083	0.98	0.99	0.98	0.99	0.99	0.98	1	1	1	0.88	1	0	0
TTTAGACTGAAAGAAGATGAGAATATACTTTCAATCATACATGAGCAAGAACAACCCACGTACAAATTGG	conserved hypothetical protein	SA0038	COL	0	0	0	1	0.56	1	0_tan	0.0001	0.65	0.66	0.47	0.84	0.65	0.43	0.88	0.88	0.63	0.6	0.64	0	0
TTTAGTGATAACAGGTACAATACATTAAGAAATATAGTTAACGGTGTAGATAGATTGATAGATGAAAGTG	hypothetical protein	SA1780	N315	1	0	0	0	0.13	1	0_tan	0.5004	0.95	0.96	0.94	0.97	0.99	0.98	0.96	0.91	0.82	0.71	1	0	0
TTTATAGTAGGTGAGATAACTAAAGATAAAAAAGGATATACACATGATAAAGATAAAAAATACCCTGTCA	hypothetical protein	MW2407	MW2	0	0	0	0	0.34	0.0024	2_orange	0	0.39	0.64	0.23	0.9	0.22	0.3	0.83	1	0.22	0.67	1	1	0
TTTATATAACTAACAAACCAACTGATAACAATTCAGATATTAGTTACTCCACAAATAGAAATAGAGCTAG	hypothetical protein	SA0337	COL	1	0	0	0	0.23	0.3071	0_tan	0.1494	0.88	0.82	0.81	0.89	0.87	0.83	0.87	0.78	0.87	0.67	0.92	0	0
TTTATATAGATTGTTTAAGAAGTTAAGAGAAACTTTTAAAGAAGAAGGGCTTGAACCATGGACATCAAGT	conserved hypothetical protein	SA0296	COL	0	0	0	0	0.35	0.0015	3_red	0	0.5	0.75	0.25	0.99	0.27	0.2	1	0.92	0.94	1	1	1	0
TTTATATTATTGTAAGGAGTGTTTCATCATGAATAAACAACAAAGTAAAGTACGCTATTCAATTAGAAAA	cell wall hydrolase	SA1264	COL	0	1	0	0	0.06	1	0_tan	0.2125	0.99	0.99	1	0.98	1	1	0.9	1	1	1	1	0	0
TTTATATTTCCTCCCATATTCAAAATATTAATTTTTTCTAATACTATTAACTTTAAAACTACGTTATCTA	hypothetical protein	MW2223	MW2	0	0	0	0	0.16	1	0_tan	0.1682	0.98	0.97	0.95	0.99	0.98	0.92	1	1	1	1	0.94	0	0
TTTATCTACATGTTTGCATTCTGGTTCATTTTTAGTTCTATTGCAGGATTATTTACGTTTACGGGTAGTG	conserved hypothetical protein	SA2491	N315	0	0	0	0	0.16	1	0_tan	1	0.99	1	0.99	1	0.98	1	1	1	1	1	1	0	0
TTTATGAAAAAGGTATTTACTTTATTCAACAAAGTCCGTTATTAGGCTATGGGCCATTTAACTATTATAA	capsular polysaccharide synthesis enzyme Cap5J	SA0153	N315	0	0	1	0	0.31	0.3065	0_tan	0.4119	0.86	0.79	0.8	0.86	0.62	1	1	0.17	0.95	0.33	0.55	0	0
TTTATGACCGTAACAGTGATACGTTAGATGGTCTACCTGTGGTTAACCTTAAATCAAGCAATTTAAAACG	hypothetical protein	SAV0892	Mu50	1	0	0	0	0.24	0.1667	0_tan	0.0279	0.8	0.88	0.78	0.9	0.74	0.95	0.91	0.8	0.73	0.6	0.88	0	0
TTTATTGATGAAAGTGATTATGATAGGTTAGTACAACTTTTAAGAAGAAAGCGAAATGTCATTCTACAGG	putative restriction enzyme	SAR0087	MRSA252	0	0	0	0	0.27	1	0_tan	0.7602	0.55	0.54	0.56	0.53	1	0.1	0.45	0.46	0.33	0.13	0.08	0	0
TTTATTGGCATCGAACTTAACACAGATGCCGCACCTTTCGTTGAACAACTGATTAAACGTGGCATTTTAT	putative ornithine aminotransferase precursor	SAR0186	MRSA252	0	0	0	0	0.26	0.1379	0_tan	0.0001	0.35	0.24	0.42	0.14	1	0.02	0.03	0	0.07	0	0.06	0	0
TTTATTTCATTGGGGAACAAATCCAACAGTTCAATATGCTTTACTTAAATTTTTAAAAGGCGATCCAAGT	putative membrane protein	SAR0638	MRSA252	0	0	0	0	0.36	0.5082	0_tan	0.1748	0.63	0.57	0.65	0.53	1	0.23	0.5	0	0.36	0	0.25	0	0
TTTCAATTCTGATGATGTTGTTGAAACTTTTGGGATATCTAAAACACATGCAAAATCCACTCTTTCAAAA	hypothetical phage protein	SAR1545	MRSA252	1	0	0	0	0.41	0.3312	0_tan	0.4177	0.78	0.71	0.78	0.71	1	0.65	0.71	0.17	0.5	0.25	0.55	0	0
TTTCCCTAAGAAAACAGACTTAGCTAAAGTAAATCAAGAGCAACTTAACTATGCATTAGACTCAATTAAT	putative transposase	SAR0085	MRSA252	0	0	0	1	0.26	0.3566	0_tan	0.1177	0.66	0.59	0.68	0.55	1	0.4	0.38	0.33	0.43	0.22	0.36	0	0
TTTCGCAAAAGATTTGTCGCTAGGAAGATTGAGGAAGCTCAATCATCCGATTCCGCTAAAAAAGTATCAG	hypothetical phage protein	SAR1554	MRSA252	1	0	0	0	0.26	0.1245	0_tan	0.0231	0.91	0.82	0.81	0.94	0.98	0.84	0.93	0.67	0.64	0.5	0.86	0	0
TTTCTATGTCCCTTTCTTTAAAAAGTTAAAAGTAACATCAGCATATGAATATTTAGAAGCTAGATTTGGC	hypothetical protein, similar to sodium-coupled permease	MW0291	MW2	0	0	0	0	0.11	1	0_tan	0.6469	0.9	0.9	0.89	0.91	0.75	0.98	0.96	1	0.95	1	0.69	0	0
TTTCTATTTTACCAATTTAATCAAACGAAAACATCAAGCTGAAGATCGCCGAAAGATTTTAATCAAGCAA	hypothetical protein	SA0923	COL	0	0	0	0	0.14	0.2165	0_tan	0.0002	0.89	0.94	0.85	0.99	0.77	0.98	1	0.75	1	1	0.93	0	0
TTTGAAGTAAAAGAAAAGACGTACAACTTACCGAATGAACACCGCCAAGTACTCAATGTGATAAGAAATA	hypothetical protein	SAR0378	MRSA252	1	0	0	0	0.2	0.4881	0_tan	0	0.87	0.91	0.78	1	1	0.66	1	0.92	0.82	1	0.88	0	0
TTTGAATATCTGGCAAGAAATGGAAATTGGTAATGTCAGTCATAAAGTCGCTAAACGTGCTCAAATACCA	conserved domain protein	SA0066	COL	0	0	0	0	0.26	0.8179	0_tan	0.4953	0.87	0.89	0.86	0.9	0.68	1	0.84	1	0.95	0.5	0.79	0	0
TTTGAATCAGCAAATACACAAATCGAAAGATGCATTGAAATATGCATCGAAAGATCCAGCAGTGTCTACA	conserved hypothetical protein	MW2567	MW2	0	0	0	0	0.07	0.6297	0_tan	0.4626	0.91	0.93	0.9	0.94	0.78	0.98	1	1	0.95	1	0.82	0	0
TTTGATGCAATATTATTTCTCAAAGAAGATACTACATTACAAAATAATGTATATATTATACCTTTTGGAC	hypothetical protein	SA0078	N315	0	0	0	0	0.27	0.07	0_tan	0.0217	0.57	0.43	0.58	0.4	0	0.97	0.32	0	0.95	0	0	0	0
TTTGATTATTCAGCTTTAATAGGTCGTATAATTGAAAAGTATGGTAATAGATATGCTTTTGCATACGCGA	putative regulatory protein	SAS1879	MRSA252	1	0	0	0	0.45	0.0146	1_yellow	0.0043	0.56	0.34	0.54	0.24	0.96	0.16	0.25	0	0.1	0	0.1	1	1
TTTGCTTGCGCTCGGTGCATGTATCCCTCTTTTACCTTACAACTTTTAGTTGTTAGGGGCTTTTTTGCAT	hypothetical protein	SAV1078	Mu50	0	0	0	0	0.16	0.4677	0_tan	0.4129	1	0.99	0.99	1	0.98	1	1	1	1	1	1	0	0
TTTGGATAATGGACAAGCGTACTACAATACTGAATACGTTCTGGGCGGAACTAAAAATCAGTATGAAAAA	conserved hypothetical protein	SA0332	COL	1	0	0	0	0.42	0.0727	0_tan	0	0.25	0.4	0.03	0.84	0.29	0.13	0.71	0.5	0.2	0.25	0.75	0	0
TTTGGGGTTACTATAAAAACGAGCAAATTAAGTGGTACGTAGACAAGGGTTTAATCGATAAAGAAGAATA	hypothetical protein	SAV0907	Mu50	1	0	0	0	0.44	0.4752	0_tan	0.2121	0.83	0.88	0.82	0.91	0.83	0.91	0.75	0.86	0.63	0.75	1	0	0
TTTGGTCGTGAGTCTTACGATAACCATGGTAGTCCAATAGTCTCATTAACACATGTAAATCATTATGGTG	zinc metalloproteinase aureolysin precursor	SAR2716	MRSA252	0	0	0	0	0.2	0.5531	0_tan	0.8453	0.86	0.82	0.84	0.85	1	0.68	0.88	0.69	0.67	0.56	1	0	0
TTTGTGTATTGAAAGTGATAAATTAGTACTGTCAACGCCTCTGTTAAAGGGTTTTAAGGACGTTGAAAAC	hypothetical protein	SA0017	COL	0	0	0	0	0.08	0.2594	0_tan	0.0066	0.95	0.98	0.94	1	0.89	1	1	1	0.95	1	1	0	0
TTTGTTCACAAGCACAATTATCACATTAGCCATTGGTGGTAAGTCTGTTGAAAAGAATGATTCCCCTTAA	conserved hypothetical protein	SA0448	COL	0	0	0	0	0.19	0.6023	0_tan	0	0.9	0.93	0.83	1	0.63	1	0.97	1	1	1	1	0	0
TTTGTTGAACCAAAAACAAAGGCGAGCGTTCGTCATATTGTATTAGATAAATGCACATTAACTTATTTAT	integrase homolog	SAV0392	Mu50	0	0	0	0	0.56	0.7756	0_tan	1	0.15	0.12	0.14	0.11	0.12	0.05	0.25	0	0.7	0	0	0	0
TTTTAAACGAGAATTTTCAAAACTCATTGGCTTCTTGATTATTGCTCTAATCGCCGTCGGACTTGTGTTC	hypothetical protein	SAV0407	Mu50	0	0	0	0	0.45	0.2725	0_tan	0	0.16	0.25	0.11	0.56	0.11	0.04	0.36	0.17	0.78	0.5	0.67	0	0
[truncated: 16 more rows]
