# Supplementary material for: Potential Associations between Severity of Infection and the Presence of Virulence-Associated Genes in Clinical Strains of Staphylococcus aureus
Source: PLoS One. 2011 Apr 26;6(4):e18673. doi: 10.1371/journal.pone.0018673 (PMC3082525; doi:10.1371/journal.pone.0018673)
Supplement: Table S3 — Primers used in this study. (XLS) [file pone.0018673.s004.xls]

## Sheet: Sheet1
		Table S3. PCR primers used for verification of 14 virulence genes identified by aCGH.
Gene Target	Primer description	Primer sequence
VRA0002	Forward	5'-AACAATTTGGTAAACCTCAAAAGG
	Reverse	5'-AATCCGTAGATCTGAAGAGACCTG
SA1483	Forward	5'-CTCTGAAACTTTATCTTCCCGAAC
	Reverse	5'-ATGATTGTTCAAGAATGTGGAATG
VRA0005	Forward	5'-ACGTAAAATTGAAACATTGTGTGG
	Reverse	5'-AAAAATATGGCAACTTAGGGAATG
SAS0928	Forward	5'-CAGACAAGGACAAAATCATACGAC
	Reverse	5'-TCATTAATTCTTCTTGCGTTAGTTC
SA0389	Forward	5'-TGAGAGCGCAAATTTAAATACTTTC
	Reverse	5'-TCGCTTGCTTAATAATACCTTTAGC
SA0329	Forward	5'-ATGACGAAGAAGGTAATAGACGAC
	Reverse	5'-TAAATTCATAACCATCAACCAAGG
SAR1546	Forward	5'-GAATATGAATGTTGCGATACTTGC
	Reverse	5'-TGAGCGACACATATAAAAGCTACC
SAR1502	Forward	5'-TTGATTGTTCCTCTATTTGCATTG
	Reverse	5'-ATCAAATTTACCGGATAATGATGG
MW1380	Forward	5'-ATTTGTCCAACCTTTACCATTCC
	Reverse	5'-CGAAAGGTTACAAGGTTTATACGC
MW1385	Forward	5'-CGACAACTACCACGTCTGAATTAC
	Reverse	5'-AATAGCGATTCGAGGTAAAGGAG
SA0338	Forward	5'-TTATATATCTACAACGGCGAGGAAC
	Reverse	5'-TAGAGATTTTTAGCCATCTCATCG
SA0397	Forward	5'-ATTCTTTTGGATAATGTAGAAGACG
	Reverse	5'-TTAATATTGGAGCCTTTTTCGTTG
SAR1555	Forward	5'-TAGCTATTTCGGAATCTCTCCAAC
	Reverse	5'-TGATTATTCAGCTTTAATAGGTCGT
